# Supplementary material for: Small Changes in pH Have Direct Effects on Marine Bacterial Community Composition: A Microcosm Approach
Source: PubMed Central journal article supplement (PMC3469576; doi:10.1371/journal.pone.0047035), 2012-10-11
Supplement: pone.0047035.s005.pdf [file pone.0047035.s005.pdf]

**Table S1. pH after the four weeks of incubation.**

| season | dilution         | pH <i>in situ</i> | pH 7.82     | pH 7.67     |
|--------|------------------|-------------------|-------------|-------------|
| spring | no dilution      | 8.20 ± 0.00       | 7.79 ± 0.00 | 7.64 ± 0.01 |
|        | serial dilution  | 8.04 ± 0.01       | 7.90 ± 0.01 | 7.75 ± 0.03 |
|        | initial dilution | 8.08 ± 0.01       | 7.56 ± 0.02 | 7.44 ± 0.03 |
| summer | no dilution      | 8.05 ± 0.00       | 7.61 ± 0.01 | 7.49 ± 0.00 |
|        | serial dilution  | 8.21 ± 0.01       | 7.94 ± 0.03 | 7.84 ± 0.01 |
|        | initial dilution | 7.27 ± 0.03       | 7.06 ± 0.05 | 6.93 ± 0.03 |
| autumn | no dilution      | 8.06 ± 0.00       | 7.71 ± 0.01 | 7.59 ± 0.00 |
|        | serial dilution  | 8.08 ± 0.01       | 7.79 ± 0.01 | 7.72 ± 0.02 |
|        | initial dilution | 7.22 ± 0.05       | 6.96 ± 0.03 | 6.95 ± 0.04 |
| winter | no dilution      | 8.10 ± 0.01       | 7.75 ± 0.01 | 7.63 ± 0.01 |
|        | serial dilution  | 8.16 ± 0.01       | 7.89 ± 0.02 | 7.78 ± 0.02 |
|        | initial dilution | 7.33 ± 0.10       | 7.24 ± 0.02 | 7.24 ± 0.01 |

Given are the means of five replicate incubations ± standard deviation. Starting values for the pH *in situ* treatment were 8.26 (spring), 8.22 (summer), 8.15 (autumn) and 8.19 (winter), respectively.
