# Supplementary material for: Small Changes in pH Have Direct Effects on Marine Bacterial Community Composition: A Microcosm Approach
Source: PubMed Central journal article supplement (PMC3469576; doi:10.1371/journal.pone.0047035), 2012-10-11
Supplement: pone.0047035.s006.pdf [file pone.0047035.s006.pdf]

**Table S2. Sample coverage obtained by 16S ribosomal amplicon pyrosequencing, based on the standardized subsample (n=494 sequences).**

| Sample             |                   | spring | summer | autumn | winter |
|--------------------|-------------------|--------|--------|--------|--------|
| d0                 |                   | 92.5%  | 95.1%  | 83.2%  | 76.5%  |
| 'no dilution'      | pH <i>in situ</i> | 94.9%  | 90.3%  | 76.5%  | 82.6%  |
|                    |                   | 95.3%  | 90.7%  | 79.4%  | 81.2%  |
|                    |                   | 95.7%  | 90.5%  | 84.2%  | 84.6%  |
|                    |                   | 96.2%  | 88.3%  | 83.0%  | 81.4%  |
|                    |                   | 97.0%  | 85.2%  | 76.5%  | 82.0%  |
|                    | pH 7.67           | 94.5%  | 87.9%  | 72.3%  | 80.4%  |
|                    |                   | 88.1%  | 92.5%  | 72.1%  | 77.5%  |
|                    |                   | 89.7%  | 89.9%  | 72.7%  | 82.8%  |
|                    |                   | 90.1%  | 87.7%  | 76.3%  | 80.8%  |
|                    |                   | 89.5%  | 90.7%  | 74.7%  | 80.0%  |
| 'serial dilution'  | pH <i>in situ</i> | 99.6%  | 98.0%  | 99.2%  | 97.6%  |
|                    |                   | 98.4%  | 99.2%  | 99.8%  | 98.2%  |
|                    |                   | 96.8%  | 97.6%  | 98.4%  | 98.4%  |
|                    |                   | 99.4%  | 97.8%  | 98.2%  | 97.8%  |
|                    |                   | 98.4%  | 98.4%  | 98.4%  | 96.8%  |
|                    | pH 7.67           | 98.6%  | 98.0%  | 98.2%  | 98.6%  |
|                    |                   | 98.6%  | 97.6%  | 99.4%  | 99.2%  |
|                    |                   | 99.0%  | 98.2%  | 98.8%  | 98.8%  |
|                    |                   | 98.6%  | 99.4%  | 98.4%  | 98.4%  |
|                    |                   | -      | 98.8%  | 98.6%  | 97.6%  |
| 'initial dilution' | pH <i>in situ</i> | -      | 95.3%  | -      | -      |
|                    |                   | -      | 96.0%  | -      | -      |
|                    |                   | -      | 94.7%  | -      | -      |
|                    |                   | -      | 93.7%  | -      | -      |
|                    |                   | -      | 92.5%  | -      | -      |
|                    | pH 7.67           | -      | 93.9%  | -      | -      |
|                    |                   | -      | 94.1%  | -      | -      |
|                    |                   | -      | -      | -      | -      |
|                    |                   | -      | 95.5%  | -      | -      |
|                    |                   | -      | 95.3%  | -      | -      |
