# Supplementary material for: Small Changes in pH Have Direct Effects on Marine Bacterial Community Composition: A Microcosm Approach
Source: PubMed Central journal article supplement (PMC3469576; doi:10.1371/journal.pone.0047035), 2012-10-11
Supplement: pone.0047035.s007.pdf [file pone.0047035.s007.pdf]

**Table S3. Results of the SIMPER analysis giving the similarities within ‘season’-‘dilution’-‘pH’ combinations.**

Displayed are the OTUs (16S ribosomal amplicon pyrosequencing) that predominantly contributed to 90% of to the total similarity. Av.A<sub>i</sub>: average abundance of the i th species over all samples of the treatment, Av.S<sub>i</sub>: average contribution of the i th species to the total similarity, Av.S<sub>i</sub>/SD: the average value of the i th species as a typifying species, Av.S<sub>i</sub>%: average percentage contribution of the i th species to the total similarity,  $\sum$ Av.S<sub>i</sub>%: average cumulative contribution to the total similarity.

| OTU                                                                | Av.A <sub>i</sub> | Av.S <sub>i</sub> | Av.S <sub>i</sub> /SD | Av.S <sub>i</sub> % | $\sum$ Av.S <sub>i</sub> % | Genus                               | Family                              | Order                               | Class                         | Phylum                 | Domain          |
|--------------------------------------------------------------------|-------------------|-------------------|-----------------------|---------------------|----------------------------|-------------------------------------|-------------------------------------|-------------------------------------|-------------------------------|------------------------|-----------------|
| Spring 'no dilution' pH <i>in situ</i> (average similarity: 60.6%) |                   |                   |                       |                     |                            |                                     |                                     |                                     |                               |                        |                 |
| Otu0005                                                            | 9.45              | 7.11              | 2.22                  | 11.74               | 11.74                      | <i>Pelagibacter</i>                 | SAR11-clade                         | <i>Rickettsiales</i>                | <i>Alphaproteobacteria</i>    | <i>Proteobacteria</i>  | <i>Bacteria</i> |
| Otu0134                                                            | 7.21              | 5.58              | 2.89                  | 9.22                | 20.96                      | unclass. <i>Gammaproteobacteria</i> | unclass. <i>Gammaproteobacteria</i> | unclass. <i>Gammaproteobacteria</i> | <i>Gammaproteobacteria</i>    | <i>Proteobacteria</i>  | <i>Bacteria</i> |
| Otu0029                                                            | 5.69              | 4.63              | 10.95                 | 7.64                | 28.6                       | unclass. <i>Bacteroidetes</i>       | unclass. <i>Bacteroidetes</i>       | unclass. <i>Bacteroidetes</i>       | unclass. <i>Bacteroidetes</i> | <i>Bacteroidetes</i>   | <i>Bacteria</i> |
| Otu0022                                                            | 5.16              | 4.3               | 7.95                  | 7.09                | 35.69                      | unclass. <i>Betaproteobacteria</i>  | unclass. <i>Betaproteobacteria</i>  | unclass. <i>Betaproteobacteria</i>  | <i>Betaproteobacteria</i>     | <i>Proteobacteria</i>  | <i>Bacteria</i> |
| Otu0008                                                            | 5.12              | 4.22              | 6.59                  | 6.97                | 42.66                      | unclass. <i>Gammaproteobacteria</i> | unclass. <i>Gammaproteobacteria</i> | unclass. <i>Gammaproteobacteria</i> | <i>Gammaproteobacteria</i>    | <i>Proteobacteria</i>  | <i>Bacteria</i> |
| Otu0002                                                            | 6.43              | 4.05              | 1.78                  | 6.69                | 49.35                      | unclass. <i>Flavobacteriaceae</i>   | <i>Flavobacteriaceae</i>            | <i>Flavobacteriales</i>             | <i>Flavobacteria</i>          | <i>Bacteroidetes</i>   | <i>Bacteria</i> |
| Otu0012                                                            | 4.52              | 3.42              | 2.19                  | 5.65                | 54.99                      | unclass. <i>Comamonadaceae</i>      | <i>Comamonadaceae</i>               | <i>Burkholderiales</i>              | <i>Betaproteobacteria</i>     | <i>Proteobacteria</i>  | <i>Bacteria</i> |
| Otu0001                                                            | 6.06              | 3.35              | 1.34                  | 5.54                | 60.53                      | unclass. <i>Flavobacteriaceae</i>   | <i>Flavobacteriaceae</i>            | <i>Flavobacteriales</i>             | <i>Flavobacteria</i>          | <i>Bacteroidetes</i>   | <i>Bacteria</i> |
| Otu0135                                                            | 3.24              | 2.33              | 2.31                  | 3.84                | 64.37                      | unclass. <i>Gammaproteobacteria</i> | unclass. <i>Gammaproteobacteria</i> | unclass. <i>Gammaproteobacteria</i> | <i>Gammaproteobacteria</i>    | <i>Proteobacteria</i>  | <i>Bacteria</i> |
| Otu0014                                                            | 3.76              | 2.21              | 1.43                  | 3.64                | 68.02                      | <i>Reinekea</i>                     | <i>Oceanospirillaceae</i>           | <i>Oceanospirillales</i>            | <i>Gammaproteobacteria</i>    | <i>Proteobacteria</i>  | <i>Bacteria</i> |
| Otu0007                                                            | 3.2               | 2.16              | 1.16                  | 3.57                | 71.58                      | unclass. <i>Flavobacteriales</i>    | unclass. <i>Flavobacteriales</i>    | <i>Flavobacteriales</i>             | <i>Flavobacteria</i>          | <i>Bacteroidetes</i>   | <i>Bacteria</i> |
| Otu0013                                                            | 2.74              | 1.87              | 3.99                  | 3.09                | 74.67                      | unclass. <i>Flavobacteriaceae</i>   | <i>Flavobacteriaceae</i>            | <i>Flavobacteriales</i>             | <i>Flavobacteria</i>          | <i>Bacteroidetes</i>   | <i>Bacteria</i> |
| Otu0010                                                            | 3.32              | 1.83              | 1.5                   | 3.02                | 77.69                      | unclass. <i>Flavobacteriaceae</i>   | <i>Flavobacteriaceae</i>            | <i>Flavobacteriales</i>             | <i>Flavobacteria</i>          | <i>Bacteroidetes</i>   | <i>Bacteria</i> |
| Otu0018                                                            | 1.91              | 1.36              | 8.42                  | 2.24                | 79.93                      | unclass. <i>Puniceococcaceae</i>    | <i>Puniceococcaceae</i>             | <i>Puniceococcales</i>              | <i>Opitutae</i>               | <i>Verrucomicrobia</i> | <i>Bacteria</i> |
| Otu0044                                                            | 1.63              | 1.26              | 3.99                  | 2.08                | 82                         | unclass. <i>Gammaproteobacteria</i> | unclass. <i>Gammaproteobacteria</i> | unclass. <i>Gammaproteobacteria</i> | <i>Gammaproteobacteria</i>    | <i>Proteobacteria</i>  | <i>Bacteria</i> |
| Otu0056                                                            | 1.59              | 1.15              | 3.06                  | 1.9                 | 83.9                       | unclass. <i>Gammaproteobacteria</i> | unclass. <i>Gammaproteobacteria</i> | unclass. <i>Gammaproteobacteria</i> | <i>Gammaproteobacteria</i>    | <i>Proteobacteria</i>  | <i>Bacteria</i> |

| OTU                                                      | Av.A <sub>i</sub> | Av.S <sub>i</sub> | Av.S <sub>i</sub> /SD | Av.S <sub>i</sub> % | ΣAv.S <sub>i</sub> % | Genus                               | Family                              | Order                               | Class                      | Phylum                 | Domain          |
|----------------------------------------------------------|-------------------|-------------------|-----------------------|---------------------|----------------------|-------------------------------------|-------------------------------------|-------------------------------------|----------------------------|------------------------|-----------------|
| Otu0052                                                  | 1.49              | 1.04              | 5.72                  | 1.71                | 85.61                | unclass. <i>Betaproteobacteria</i>  | unclass. <i>Betaproteobacteria</i>  | unclass. <i>Betaproteobacteria</i>  | <i>Betaproteobacteria</i>  | <i>Proteobacteria</i>  | <i>Bacteria</i> |
| Otu0041                                                  | 1.76              | 0.96              | 1.06                  | 1.59                | 87.2                 | <i>Sulfitobacter</i>                | <i>Rhodobacteraceae</i>             | <i>Rhodobacterales</i>              | <i>Alphaproteobacteria</i> | <i>Proteobacteria</i>  | <i>Bacteria</i> |
| Otu0020                                                  | 1.78              | 0.96              | 0.96                  | 1.58                | 88.78                | unclass. <i>Flammeovirgaceae</i>    | <i>Flammeovirgaceae</i>             | <i>Sphingobacteriales</i>           | <i>Sphingobacteria</i>     | <i>Bacteroidetes</i>   | <i>Bacteria</i> |
| Otu0139                                                  | 1.76              | 0.96              | 1.12                  | 1.58                | 90.36                | unclass. <i>Gammaproteobacteria</i> | unclass. <i>Gammaproteobacteria</i> | unclass. <i>Gammaproteobacteria</i> | <i>Gammaproteobacteria</i> | <i>Proteobacteria</i>  | <i>Bacteria</i> |
| Spring 'no dilution' pH 7.67 (average similarity: 57.1%) |                   |                   |                       |                     |                      |                                     |                                     |                                     |                            |                        |                 |
| Otu0002                                                  | 7.01              | 3.65              | 3.39                  | 6.4                 | 6.4                  | unclass. <i>Flavobacteriaceae</i>   | <i>Flavobacteriaceae</i>            | <i>Flavobacteriales</i>             | <i>Flavobacteria</i>       | <i>Bacteroidetes</i>   | <i>Bacteria</i> |
| Otu0018                                                  | 5.96              | 3.4               | 11.57                 | 5.95                | 12.34                | unclass. <i>Puniceicoccaceae</i>    | <i>Puniceicoccaceae</i>             | <i>Puniceicoccales</i>              | <i>Opitutae</i>            | <i>Verrucomicrobia</i> | <i>Bacteria</i> |
| Otu0013                                                  | 5.62              | 3.33              | 9.8                   | 5.83                | 18.17                | unclass. <i>Flavobacteriaceae</i>   | <i>Flavobacteriaceae</i>            | <i>Flavobacteriales</i>             | <i>Flavobacteria</i>       | <i>Bacteroidetes</i>   | <i>Bacteria</i> |
| Otu0134                                                  | 5.85              | 3.08              | 2.4                   | 5.39                | 23.56                | unclass. <i>Gammaproteobacteria</i> | unclass. <i>Gammaproteobacteria</i> | unclass. <i>Gammaproteobacteria</i> | <i>Gammaproteobacteria</i> | <i>Proteobacteria</i>  | <i>Bacteria</i> |
| Otu0010                                                  | 5.77              | 2.84              | 3.21                  | 4.98                | 28.54                | unclass. <i>Flavobacteriaceae</i>   | <i>Flavobacteriaceae</i>            | <i>Flavobacteriales</i>             | <i>Flavobacteria</i>       | <i>Bacteroidetes</i>   | <i>Bacteria</i> |
| Otu0056                                                  | 4.87              | 2.81              | 8.75                  | 4.93                | 33.47                | unclass. <i>Gammaproteobacteria</i> | unclass. <i>Gammaproteobacteria</i> | unclass. <i>Gammaproteobacteria</i> | <i>Gammaproteobacteria</i> | <i>Proteobacteria</i>  | <i>Bacteria</i> |
| Otu0005                                                  | 4.62              | 2.14              | 3.84                  | 3.74                | 37.21                | <i>Pelagibacter</i>                 | SAR11-clade                         | <i>Rickettsiales</i>                | <i>Alphaproteobacteria</i> | <i>Proteobacteria</i>  | <i>Bacteria</i> |
| Otu0001                                                  | 4.13              | 2.13              | 3.64                  | 3.72                | 40.94                | unclass. <i>Flavobacteriaceae</i>   | <i>Flavobacteriaceae</i>            | <i>Flavobacteriales</i>             | <i>Flavobacteria</i>       | <i>Bacteroidetes</i>   | <i>Bacteria</i> |
| Otu0139                                                  | 3.91              | 2.06              | 8.22                  | 3.61                | 44.54                | unclass. <i>Gammaproteobacteria</i> | unclass. <i>Gammaproteobacteria</i> | unclass. <i>Gammaproteobacteria</i> | <i>Gammaproteobacteria</i> | <i>Proteobacteria</i>  | <i>Bacteria</i> |
| Otu0007                                                  | 4.03              | 1.82              | 3                     | 3.19                | 47.74                | unclass. <i>Flavobacteriales</i>    | unclass. <i>Flavobacteriales</i>    | <i>Flavobacteriales</i>             | <i>Flavobacteria</i>       | <i>Bacteroidetes</i>   | <i>Bacteria</i> |
| Otu0014                                                  | 3.88              | 1.61              | 2.4                   | 2.82                | 50.56                | <i>Reinekea</i>                     | <i>Oceanospirillaceae</i>           | <i>Oceanospirillales</i>            | <i>Gammaproteobacteria</i> | <i>Proteobacteria</i>  | <i>Bacteria</i> |
| Otu0055                                                  | 2.31              | 1.31              | 8.79                  | 2.29                | 52.85                | <i>Colwellia</i>                    | <i>Colwelliaceae</i>                | <i>Alteromonadales</i>              | <i>Gammaproteobacteria</i> | <i>Proteobacteria</i>  | <i>Bacteria</i> |
| Otu0041                                                  | 2.71              | 1.29              | 3.45                  | 2.26                | 55.11                | <i>Sulfitobacter</i>                | <i>Rhodobacteraceae</i>             | <i>Rhodobacterales</i>              | <i>Alphaproteobacteria</i> | <i>Proteobacteria</i>  | <i>Bacteria</i> |
| Otu0025                                                  | 2.74              | 1.17              | 1.72                  | 2.05                | 57.16                | <i>Polaribacter</i>                 | <i>Flavobacteriaceae</i>            | <i>Flavobacteriales</i>             | <i>Flavobacteria</i>       | <i>Bacteroidetes</i>   | <i>Bacteria</i> |
| Otu0151                                                  | 2.27              | 1.14              | 5.09                  | 2                   | 59.16                | <i>Rhodococcus</i>                  | <i>Nocardiaceae</i>                 | <i>Actinomycetales</i>              | <i>Actinobacteria</i>      | <i>Actinobacteria</i>  | <i>Bacteria</i> |
| Otu0019                                                  | 2.32              | 1.13              | 3.82                  | 1.99                | 61.15                | unclass. <i>Gammaproteobacteria</i> | unclass. <i>Gammaproteobacteria</i> | unclass. <i>Gammaproteobacteria</i> | <i>Gammaproteobacteria</i> | <i>Proteobacteria</i>  | <i>Bacteria</i> |
| Otu0022                                                  | 2.41              | 1.09              | 3.14                  | 1.91                | 63.06                | unclass. <i>Betaproteobacteria</i>  | unclass. <i>Betaproteobacteria</i>  | unclass. <i>Betaproteobacteria</i>  | <i>Betaproteobacteria</i>  | <i>Proteobacteria</i>  | <i>Bacteria</i> |
| Otu0143                                                  | 2.11              | 1.01              | 2.97                  | 1.78                | 64.84                | unclass. <i>Gammaproteobacteria</i> | unclass. <i>Gammaproteobacteria</i> | unclass. <i>Gammaproteobacteria</i> | <i>Gammaproteobacteria</i> | <i>Proteobacteria</i>  | <i>Bacteria</i> |
| Otu0135                                                  | 1.86              | 0.96              | 6.21                  | 1.67                | 66.51                | unclass. <i>Gammaproteobacteria</i> | unclass. <i>Gammaproteobacteria</i> | unclass. <i>Gammaproteobacteria</i> | <i>Gammaproteobacteria</i> | <i>Proteobacteria</i>  | <i>Bacteria</i> |
| Otu0232                                                  | 1.66              | 0.92              | 6.15                  | 1.6                 | 68.11                | unclass. <i>Rhodobacteraceae</i>    | <i>Rhodobacteraceae</i>             | <i>Rhodobacterales</i>              | <i>Alphaproteobacteria</i> | <i>Proteobacteria</i>  | <i>Bacteria</i> |
| Otu0020                                                  | 2.15              | 0.91              | 2.63                  | 1.59                | 69.7                 | unclass. <i>Flammeovirgaceae</i>    | <i>Flammeovirgaceae</i>             | <i>Sphingobacteriales</i>           | <i>Sphingobacteria</i>     | <i>Bacteroidetes</i>   | <i>Bacteria</i> |
| Otu0035                                                  | 1.91              | 0.89              | 3.71                  | 1.55                | 71.25                | <i>Colwellia</i>                    | <i>Colwelliaceae</i>                | <i>Alteromonadales</i>              | <i>Gammaproteobacteria</i> | <i>Proteobacteria</i>  | <i>Bacteria</i> |

| OTU                                                                    | Av.A <sub>i</sub> | Av.S <sub>i</sub> | Av.S <sub>i</sub> /SD | Av.S <sub>i</sub> % | ΣAv.S <sub>i</sub> % | Genus                               | Family                              | Order                               | Class                         | Phylum                   | Domain          |
|------------------------------------------------------------------------|-------------------|-------------------|-----------------------|---------------------|----------------------|-------------------------------------|-------------------------------------|-------------------------------------|-------------------------------|--------------------------|-----------------|
| Otu0044                                                                | 1.81              | 0.84              | 3.12                  | 1.48                | 72.73                | unclass. <i>Gammaproteobacteria</i> | unclass. <i>Gammaproteobacteria</i> | unclass. <i>Gammaproteobacteria</i> | <i>Gammaproteobacteria</i>    | <i>Proteobacteria</i>    | <i>Bacteria</i> |
| Otu0144                                                                | 1.49              | 0.74              | 3.27                  | 1.29                | 74.02                | <i>Lewinella</i>                    | <i>Saprospiraceae</i>               | <i>Sphingobacteriales</i>           | <i>Sphingobacteria</i>        | <i>Bacteroidetes</i>     | <i>Bacteria</i> |
| Otu0062                                                                | 1.93              | 0.7               | 0.92                  | 1.22                | 75.25                | <i>Haliea</i>                       | <i>Alteromonadaceae</i>             | <i>Alteromonadales</i>              | <i>Gammaproteobacteria</i>    | <i>Proteobacteria</i>    | <i>Bacteria</i> |
| Otu0070                                                                | 1.43              | 0.69              | 6.01                  | 1.21                | 76.45                | <i>Winogradskyella</i>              | <i>Flavobacteriaceae</i>            | <i>Flavobacteriales</i>             | <i>Flavobacteria</i>          | <i>Bacteroidetes</i>     | <i>Bacteria</i> |
| Otu0169                                                                | 1.17              | 0.63              | 7.02                  | 1.1                 | 77.55                | unclass. <i>Bacteria</i>            | unclass. <i>Bacteria</i>            | unclass. <i>Bacteria</i>            | unclass. <i>Bacteria</i>      | unclass. <i>Bacteria</i> | <i>Bacteria</i> |
| Otu0037                                                                | 1.08              | 0.6               | 12.32                 | 1.06                | 78.61                | <i>Marinobacter</i>                 | <i>Alteromonadaceae</i>             | <i>Alteromonadales</i>              | <i>Gammaproteobacteria</i>    | <i>Proteobacteria</i>    | <i>Bacteria</i> |
| Otu0006                                                                | 1.36              | 0.55              | 1.15                  | 0.97                | 79.58                | <i>Polaribacter</i>                 | <i>Flavobacteriaceae</i>            | <i>Flavobacteriales</i>             | <i>Flavobacteria</i>          | <i>Bacteroidetes</i>     | <i>Bacteria</i> |
| Otu0092                                                                | 1.31              | 0.53              | 1.16                  | 0.93                | 80.51                | unclass. <i>Bacteroidetes</i>       | unclass. <i>Bacteroidetes</i>       | unclass. <i>Bacteroidetes</i>       | unclass. <i>Bacteroidetes</i> | <i>Bacteroidetes</i>     | <i>Bacteria</i> |
| Otu0012                                                                | 1.48              | 0.5               | 1.03                  | 0.87                | 81.38                | unclass. <i>Comamonadaceae</i>      | <i>Comamonadaceae</i>               | <i>Burkholderiales</i>              | <i>Betaproteobacteria</i>     | <i>Proteobacteria</i>    | <i>Bacteria</i> |
| Otu0160                                                                | 1.34              | 0.47              | 1.09                  | 0.82                | 82.2                 | <i>Colwellia</i>                    | <i>Colwelliaceae</i>                | <i>Alteromonadales</i>              | <i>Gammaproteobacteria</i>    | <i>Proteobacteria</i>    | <i>Bacteria</i> |
| Otu0145                                                                | 1.17              | 0.41              | 1.13                  | 0.72                | 82.92                | unclass. <i>Gammaproteobacteria</i> | unclass. <i>Gammaproteobacteria</i> | unclass. <i>Gammaproteobacteria</i> | <i>Gammaproteobacteria</i>    | <i>Proteobacteria</i>    | <i>Bacteria</i> |
| Otu0213                                                                | 0.97              | 0.39              | 1.12                  | 0.68                | 83.6                 | unclass. <i>Gammaproteobacteria</i> | unclass. <i>Gammaproteobacteria</i> | unclass. <i>Gammaproteobacteria</i> | <i>Gammaproteobacteria</i>    | <i>Proteobacteria</i>    | <i>Bacteria</i> |
| Otu0150                                                                | 0.97              | 0.39              | 1.14                  | 0.68                | 84.28                | unclass. <i>Bacteria</i>            | unclass. <i>Bacteria</i>            | unclass. <i>Bacteria</i>            | unclass. <i>Bacteria</i>      | unclass. <i>Bacteria</i> | <i>Bacteria</i> |
| Otu0148                                                                | 1.08              | 0.38              | 1.14                  | 0.67                | 84.95                | unclass. <i>Sphingobacteriales</i>  | unclass. <i>Sphingobacteriales</i>  | <i>Sphingobacteriales</i>           | <i>Sphingobacteria</i>        | <i>Bacteroidetes</i>     | <i>Bacteria</i> |
| Otu0119                                                                | 0.95              | 0.37              | 1.15                  | 0.65                | 85.59                | <i>Colwellia</i>                    | <i>Colwelliaceae</i>                | <i>Alteromonadales</i>              | <i>Gammaproteobacteria</i>    | <i>Proteobacteria</i>    | <i>Bacteria</i> |
| Otu0174                                                                | 0.88              | 0.36              | 1.15                  | 0.64                | 86.23                | unclass. <i>Flavobacteriaceae</i>   | <i>Flavobacteriaceae</i>            | <i>Flavobacteriales</i>             | <i>Flavobacteria</i>          | <i>Bacteroidetes</i>     | <i>Bacteria</i> |
| Otu0042                                                                | 0.95              | 0.34              | 1.16                  | 0.6                 | 86.83                | <i>Rhodococcus</i>                  | <i>Nocardiaceae</i>                 | <i>Actinomycetales</i>              | <i>Actinobacteria</i>         | <i>Actinobacteria</i>    | <i>Bacteria</i> |
| Otu0146                                                                | 0.95              | 0.34              | 1.16                  | 0.6                 | 87.43                | <i>Reichenbachella</i>              | <i>Flammeovirgaceae</i>             | <i>Sphingobacteriales</i>           | <i>Sphingobacteria</i>        | <i>Bacteroidetes</i>     | <i>Bacteria</i> |
| Otu0187                                                                | 0.8               | 0.34              | 1.16                  | 0.6                 | 88.04                | <i>Lentisphaera</i>                 | <i>Lentisphaeraceae</i>             | <i>Lentisphaerales</i>              | <i>Lentisphaeria</i>          | <i>Lentisphaerae</i>     | <i>Bacteria</i> |
| Otu0237                                                                | 0.95              | 0.34              | 1.16                  | 0.6                 | 88.64                | unclass. <i>Flavobacteriaceae</i>   | <i>Flavobacteriaceae</i>            | <i>Flavobacteriales</i>             | <i>Flavobacteria</i>          | <i>Bacteroidetes</i>     | <i>Bacteria</i> |
| Otu0149                                                                | 0.77              | 0.22              | 0.61                  | 0.39                | 89.03                | unclass. <i>Gammaproteobacteria</i> | unclass. <i>Gammaproteobacteria</i> | unclass. <i>Gammaproteobacteria</i> | <i>Gammaproteobacteria</i>    | <i>Proteobacteria</i>    | <i>Bacteria</i> |
| Otu0177                                                                | 0.83              | 0.22              | 0.61                  | 0.39                | 89.42                | <i>Haliea</i>                       | <i>Alteromonadaceae</i>             | <i>Alteromonadales</i>              | <i>Gammaproteobacteria</i>    | <i>Proteobacteria</i>    | <i>Bacteria</i> |
| Otu0029                                                                | 1.39              | 0.21              | 0.59                  | 0.38                | 89.8                 | unclass. <i>Bacteroidetes</i>       | unclass. <i>Bacteroidetes</i>       | unclass. <i>Bacteroidetes</i>       | unclass. <i>Bacteroidetes</i> | <i>Bacteroidetes</i>     | <i>Bacteria</i> |
| Otu0009                                                                | 0.77              | 0.21              | 0.62                  | 0.37                | 90.17                | unclass. <i>Rhodobacteraceae</i>    | <i>Rhodobacteraceae</i>             | <i>Rhodobacterales</i>              | <i>Alphaproteobacteria</i>    | <i>Proteobacteria</i>    | <i>Bacteria</i> |
| Spring 'serial dilution' pH <i>in situ</i> (average similarity: 48.0%) |                   |                   |                       |                     |                      |                                     |                                     |                                     |                               |                          |                 |
| Otu0027                                                                | 11.23             | 11.78             | 1.38                  | 24.55               | 24.55                | <i>Pseudoalteromonas</i>            | <i>Pseudoalteromonadaceae</i>       | <i>Alteromonadales</i>              | <i>Gammaproteobacteria</i>    | <i>Proteobacteria</i>    | <i>Bacteria</i> |
| Otu0106                                                                | 7.05              | 9.25              | 1.46                  | 19.29               | 43.85                | <i>Marinomonas</i>                  | <i>Oceanospirillaceae</i>           | <i>Oceanospirillales</i>            | <i>Gammaproteobacteria</i>    | <i>Proteobacteria</i>    | <i>Bacteria</i> |

| OTU                                                                | Av.A <sub>i</sub> | Av.S <sub>i</sub> | Av.S <sub>i</sub> /SD | Av.S <sub>i</sub> % | ∑Av.S <sub>i</sub> % | Genus                             | Family                          | Order                    | Class                        | Phylum                | Domain          |
|--------------------------------------------------------------------|-------------------|-------------------|-----------------------|---------------------|----------------------|-----------------------------------|---------------------------------|--------------------------|------------------------------|-----------------------|-----------------|
| Otu0035                                                            | 9.32              | 7.97              | 0.9                   | 16.62               | 60.46                | <i>Colwellia</i>                  | <i>Colwelliaceae</i>            | <i>Alteromonadales</i>   | <i>Gammaproteobacteria</i>   | <i>Proteobacteria</i> | <i>Bacteria</i> |
| Otu0107                                                            | 4.07              | 5.41              | 3.34                  | 11.28               | 71.74                | unclass. <i>Rhodobacteraceae</i>  | <i>Rhodobacteraceae</i>         | <i>Rhodobacterales</i>   | <i>Alphaproteobacteria</i>   | <i>Proteobacteria</i> | <i>Bacteria</i> |
| Otu0036                                                            | 3.68              | 4.31              | 1.82                  | 8.98                | 80.73                | <i>Glaciecola</i>                 | <i>Alteromonadaceae</i>         | <i>Alteromonadales</i>   | <i>Gammaproteobacteria</i>   | <i>Proteobacteria</i> | <i>Bacteria</i> |
| Otu0111                                                            | 2.28              | 2.27              | 0.87                  | 4.74                | 85.46                | <i>Marinomonas</i>                | <i>Oceanospirillaceae</i>       | <i>Oceanospirillales</i> | <i>Gammaproteobacteria</i>   | <i>Proteobacteria</i> | <i>Bacteria</i> |
| Otu0108                                                            | 1.4               | 1.02              | 1.12                  | 2.12                | 87.58                | unclass. <i>Colwelliaceae</i>     | <i>Colwelliaceae</i>            | <i>Alteromonadales</i>   | <i>Gammaproteobacteria</i>   | <i>Proteobacteria</i> | <i>Bacteria</i> |
| Otu0113                                                            | 1.95              | 0.83              | 0.51                  | 1.73                | 89.31                | <i>Colwellia</i>                  | <i>Colwelliaceae</i>            | <i>Alteromonadales</i>   | <i>Gammaproteobacteria</i>   | <i>Proteobacteria</i> | <i>Bacteria</i> |
| Otu0132                                                            | 1.08              | 0.79              | 0.61                  | 1.64                | 90.95                | unclass. <i>Alteromonadales</i>   | unclass. <i>Alteromonadales</i> | <i>Alteromonadales</i>   | <i>Gammaproteobacteria</i>   | <i>Proteobacteria</i> | <i>Bacteria</i> |
| Spring 'serial dilution' pH 7.67 (average similarity: 67.4%)       |                   |                   |                       |                     |                      |                                   |                                 |                          |                              |                       |                 |
| Otu0027                                                            | 18.57             | 25.53             | 13.36                 | 37.87               | 37.87                | <i>Pseudoalteromonas</i>          | <i>Pseudoalteromonadaceae</i>   | <i>Alteromonadales</i>   | <i>Gammaproteobacteria</i>   | <i>Proteobacteria</i> | <i>Bacteria</i> |
| Otu0106                                                            | 4.44              | 5                 | 3.5                   | 7.42                | 45.29                | <i>Marinomonas</i>                | <i>Oceanospirillaceae</i>       | <i>Oceanospirillales</i> | <i>Gammaproteobacteria</i>   | <i>Proteobacteria</i> | <i>Bacteria</i> |
| Otu0109                                                            | 3.81              | 4.5               | 14.57                 | 6.67                | 51.95                | <i>Alteromonas</i>                | <i>Alteromonadaceae</i>         | <i>Alteromonadales</i>   | <i>Gammaproteobacteria</i>   | <i>Proteobacteria</i> | <i>Bacteria</i> |
| Otu0039                                                            | 4.41              | 4.28              | 3.46                  | 6.36                | 58.31                | <i>Pseudoalteromonas</i>          | <i>Pseudoalteromonadaceae</i>   | <i>Alteromonadales</i>   | <i>Gammaproteobacteria</i>   | <i>Proteobacteria</i> | <i>Bacteria</i> |
| Otu0111                                                            | 3                 | 3.11              | 3.37                  | 4.62                | 62.93                | <i>Marinomonas</i>                | <i>Oceanospirillaceae</i>       | <i>Oceanospirillales</i> | <i>Gammaproteobacteria</i>   | <i>Proteobacteria</i> | <i>Bacteria</i> |
| Otu0114                                                            | 2.57              | 3.03              | 4.57                  | 4.5                 | 67.43                | <i>Shewanella</i>                 | <i>Shewanellaceae</i>           | <i>Alteromonadales</i>   | <i>Gammaproteobacteria</i>   | <i>Proteobacteria</i> | <i>Bacteria</i> |
| Otu0059                                                            | 2.27              | 2.64              | 3.95                  | 3.92                | 71.35                | <i>Flavobacterium</i>             | <i>Flavobacteriaceae</i>        | <i>Flavobacteriales</i>  | <i>Flavobacteria</i>         | <i>Bacteroidetes</i>  | <i>Bacteria</i> |
| Otu0113                                                            | 2.22              | 2.6               | 3.32                  | 3.86                | 75.21                | <i>Colwellia</i>                  | <i>Colwelliaceae</i>            | <i>Alteromonadales</i>   | <i>Gammaproteobacteria</i>   | <i>Proteobacteria</i> | <i>Bacteria</i> |
| Otu0115                                                            | 2.07              | 2.48              | 5.26                  | 3.68                | 78.89                | <i>Glaciecola</i>                 | <i>Alteromonadaceae</i>         | <i>Alteromonadales</i>   | <i>Gammaproteobacteria</i>   | <i>Proteobacteria</i> | <i>Bacteria</i> |
| Otu0117                                                            | 1.87              | 1.96              | 3.23                  | 2.9                 | 81.79                | <i>Arcobacter</i>                 | <i>Campylobacteraceae</i>       | <i>Campylobacterales</i> | <i>Epsilonproteobacteria</i> | <i>Proteobacteria</i> | <i>Bacteria</i> |
| Otu0035                                                            | 2.06              | 1.76              | 0.9                   | 2.61                | 84.39                | <i>Colwellia</i>                  | <i>Colwelliaceae</i>            | <i>Alteromonadales</i>   | <i>Gammaproteobacteria</i>   | <i>Proteobacteria</i> | <i>Bacteria</i> |
| Otu0120                                                            | 1.29              | 1.52              | 6.43                  | 2.26                | 86.65                | <i>Pseudoalteromonas</i>          | <i>Pseudoalteromonadaceae</i>   | <i>Alteromonadales</i>   | <i>Gammaproteobacteria</i>   | <i>Proteobacteria</i> | <i>Bacteria</i> |
| Otu0107                                                            | 2.41              | 1.45              | 0.77                  | 2.16                | 88.81                | unclass. <i>Rhodobacteraceae</i>  | <i>Rhodobacteraceae</i>         | <i>Rhodobacterales</i>   | <i>Alphaproteobacteria</i>   | <i>Proteobacteria</i> | <i>Bacteria</i> |
| Otu0036                                                            | 1.53              | 1.22              | 0.91                  | 1.81                | 90.62                | <i>Glaciecola</i>                 | <i>Alteromonadaceae</i>         | <i>Alteromonadales</i>   | <i>Gammaproteobacteria</i>   | <i>Proteobacteria</i> | <i>Bacteria</i> |
| Summer 'no dilution' pH <i>in situ</i> (average similarity: 47.9%) |                   |                   |                       |                     |                      |                                   |                                 |                          |                              |                       |                 |
| Otu0005                                                            | 15.27             | 10.06             | 9.45                  | 21                  | 21                   | <i>Pelagibacter</i>               | SAR11-clade                     | <i>Rickettsiales</i>     | <i>Alphaproteobacteria</i>   | <i>Proteobacteria</i> | <i>Bacteria</i> |
| Otu0691                                                            | 5.44              | 3.02              | 4.19                  | 6.31                | 27.31                | <i>Planctomyces</i>               | <i>Planctomycetaceae</i>        | <i>Planctomycetales</i>  | <i>Planctomycetacia</i>      | <i>Planctomycetes</i> | <i>Bacteria</i> |
| Otu0001                                                            | 4.58              | 2.74              | 5.4                   | 5.72                | 33.03                | unclass. <i>Flavobacteriaceae</i> | <i>Flavobacteriaceae</i>        | <i>Flavobacteriales</i>  | <i>Flavobacteria</i>         | <i>Bacteroidetes</i>  | <i>Bacteria</i> |
| Otu0003                                                            | 3.21              | 2.12              | 13.52                 | 4.42                | 37.45                | unclass. <i>Rhodobacteraceae</i>  | <i>Rhodobacteraceae</i>         | <i>Rhodobacterales</i>   | <i>Alphaproteobacteria</i>   | <i>Proteobacteria</i> | <i>Bacteria</i> |

| OTU     | Av.A <sub>i</sub> | Av.S <sub>i</sub> | Av.S <sub>i</sub> /SD | Av.S <sub>i</sub> % | ΣAv.S <sub>i</sub> % | Genus                               | Family                              | Order                               | Class                          | Phylum                   | Domain          |
|---------|-------------------|-------------------|-----------------------|---------------------|----------------------|-------------------------------------|-------------------------------------|-------------------------------------|--------------------------------|--------------------------|-----------------|
| Otu0052 | 2.91              | 1.76              | 7.89                  | 3.67                | 41.12                | unclass. <i>Betaproteobacteria</i>  | unclass. <i>Betaproteobacteria</i>  | unclass. <i>Betaproteobacteria</i>  | <i>Betaproteobacteria</i>      | <i>Proteobacteria</i>    | <i>Bacteria</i> |
| Otu0203 | 3.14              | 1.67              | 3.31                  | 3.49                | 44.61                | <i>Pelagibacter</i>                 | SAR11-clade                         | <i>Rickettsiales</i>                | <i>Alphaproteobacteria</i>     | <i>Proteobacteria</i>    | <i>Bacteria</i> |
| Otu0693 | 3.22              | 1.58              | 2.54                  | 3.29                | 47.9                 | <i>Planctomyces</i>                 | <i>Planctomycetaceae</i>            | <i>Planctomycetales</i>             | <i>Planctomycetacia</i>        | <i>Planctomycetes</i>    | <i>Bacteria</i> |
| Otu0007 | 2.06              | 1.23              | 4.26                  | 2.58                | 50.48                | unclass. <i>Flavobacteriales</i>    | unclass. <i>Flavobacteriales</i>    | <i>Flavobacteriales</i>             | <i>Flavobacteria</i>           | <i>Bacteroidetes</i>     | <i>Bacteria</i> |
| Otu0706 | 1.99              | 1.16              | 6.04                  | 2.42                | 52.9                 | unclass. <i>Planctomycetaceae</i>   | <i>Planctomycetaceae</i>            | <i>Planctomycetales</i>             | <i>Planctomycetacia</i>        | <i>Planctomycetes</i>    | <i>Bacteria</i> |
| Otu0692 | 2.21              | 1.11              | 2.28                  | 2.32                | 55.22                | unclass. <i>Bacteria</i>            | unclass. <i>Bacteria</i>            | unclass. <i>Bacteria</i>            | unclass. <i>Bacteria</i>       | unclass. <i>Bacteria</i> | <i>Bacteria</i> |
| Otu0461 | 1.89              | 0.9               | 4.06                  | 1.87                | 57.09                | unclass. <i>Microbacteriaceae</i>   | <i>Microbacteriaceae</i>            | <i>Actinomycetales</i>              | <i>Actinobacteria</i>          | <i>Actinobacteria</i>    | <i>Bacteria</i> |
| Otu0068 | 1.51              | 0.89              | 4.97                  | 1.85                | 58.94                | <i>Pelagibacter</i>                 | SAR11-clade                         | <i>Rickettsiales</i>                | <i>Alphaproteobacteria</i>     | <i>Proteobacteria</i>    | <i>Bacteria</i> |
| Otu0519 | 1.72              | 0.82              | 3.81                  | 1.71                | 60.65                | unclass. <i>Rhodospirillaceae</i>   | <i>Rhodospirillaceae</i>            | <i>Rhodospirillales</i>             | <i>Alphaproteobacteria</i>     | <i>Proteobacteria</i>    | <i>Bacteria</i> |
| Otu0463 | 1.43              | 0.8               | 4.36                  | 1.67                | 62.32                | unclass. <i>Flavobacteriaceae</i>   | <i>Flavobacteriaceae</i>            | <i>Flavobacteriales</i>             | <i>Flavobacteria</i>           | <i>Bacteroidetes</i>     | <i>Bacteria</i> |
| Otu0473 | 1.63              | 0.8               | 4.85                  | 1.67                | 63.99                | unclass. <i>Alphaproteobacteria</i> | unclass. <i>Alphaproteobacteria</i> | unclass. <i>Alphaproteobacteria</i> | <i>Alphaproteobacteria</i>     | <i>Proteobacteria</i>    | <i>Bacteria</i> |
| Otu0019 | 1.33              | 0.69              | 18.39                 | 1.45                | 65.44                | unclass. <i>Gammaproteobacteria</i> | unclass. <i>Gammaproteobacteria</i> | unclass. <i>Gammaproteobacteria</i> | <i>Gammaproteobacteria</i>     | <i>Proteobacteria</i>    | <i>Bacteria</i> |
| Otu0521 | 1.08              | 0.69              | 18.39                 | 1.45                | 66.88                | unclass. <i>Rhodobacteraceae</i>    | <i>Rhodobacteraceae</i>             | <i>Rhodobacterales</i>              | <i>Alphaproteobacteria</i>     | <i>Proteobacteria</i>    | <i>Bacteria</i> |
| Otu0495 | 1.53              | 0.63              | 1.14                  | 1.31                | 68.19                | unclass. <i>Flavobacteriales</i>    | unclass. <i>Flavobacteriales</i>    | <i>Flavobacteriales</i>             | <i>Flavobacteria</i>           | <i>Bacteroidetes</i>     | <i>Bacteria</i> |
| Otu0512 | 1.58              | 0.6               | 0.95                  | 1.24                | 69.44                | <i>Rhodopirellula</i>               | <i>Planctomycetaceae</i>            | <i>Planctomycetales</i>             | <i>Planctomycetacia</i>        | <i>Planctomycetes</i>    | <i>Bacteria</i> |
| Otu0046 | 1.29              | 0.59              | 1.08                  | 1.23                | 70.67                | unclass. <i>Flavobacteriaceae</i>   | <i>Flavobacteriaceae</i>            | <i>Flavobacteriales</i>             | <i>Flavobacteria</i>           | <i>Bacteroidetes</i>     | <i>Bacteria</i> |
| Otu0157 | 1.37              | 0.56              | 1.08                  | 1.17                | 71.84                | unclass. <i>Gammaproteobacteria</i> | unclass. <i>Gammaproteobacteria</i> | unclass. <i>Gammaproteobacteria</i> | <i>Gammaproteobacteria</i>     | <i>Proteobacteria</i>    | <i>Bacteria</i> |
| Otu0450 | 1.66              | 0.52              | 0.94                  | 1.09                | 72.93                | <i>Sphingobium</i>                  | <i>Sphingomonadaceae</i>            | <i>Sphingomonadales</i>             | <i>Alphaproteobacteria</i>     | <i>Proteobacteria</i>    | <i>Bacteria</i> |
| Otu0469 | 1.52              | 0.51              | 1.1                   | 1.07                | 74                   | unclass. <i>Bacteria</i>            | unclass. <i>Bacteria</i>            | unclass. <i>Bacteria</i>            | unclass. <i>Bacteria</i>       | unclass. <i>Bacteria</i> | <i>Bacteria</i> |
| Otu0354 | 1.11              | 0.49              | 1.12                  | 1.03                | 75.03                | <i>Andersenella</i>                 | <i>Rhodobiaceae</i>                 | <i>Rhizobiales</i>                  | <i>Alphaproteobacteria</i>     | <i>Proteobacteria</i>    | <i>Bacteria</i> |
| Otu0053 | 1.29              | 0.47              | 1.06                  | 0.99                | 76.02                | unclass. <i>Rhodobacteraceae</i>    | <i>Rhodobacteraceae</i>             | <i>Rhodobacterales</i>              | <i>Alphaproteobacteria</i>     | <i>Proteobacteria</i>    | <i>Bacteria</i> |
| Otu0186 | 0.97              | 0.46              | 1.13                  | 0.97                | 76.98                | unclass. <i>Planctomycetaceae</i>   | <i>Planctomycetaceae</i>            | <i>Planctomycetales</i>             | <i>Planctomycetacia</i>        | <i>Planctomycetes</i>    | <i>Bacteria</i> |
| Otu0704 | 0.97              | 0.46              | 1.14                  | 0.96                | 77.95                | unclass. <i>Proteobacteria</i>      | unclass. <i>Proteobacteria</i>      | unclass. <i>Proteobacteria</i>      | unclass. <i>Proteobacteria</i> | <i>Proteobacteria</i>    | <i>Bacteria</i> |
| Otu0503 | 1.15              | 0.46              | 1.1                   | 0.95                | 78.9                 | unclass. <i>Bacteroidetes</i>       | unclass. <i>Bacteroidetes</i>       | unclass. <i>Bacteroidetes</i>       | unclass. <i>Bacteroidetes</i>  | <i>Bacteroidetes</i>     | <i>Bacteria</i> |
| Otu0502 | 1.03              | 0.44              | 1.14                  | 0.93                | 79.83                | unclass. <i>Gammaproteobacteria</i> | unclass. <i>Gammaproteobacteria</i> | unclass. <i>Gammaproteobacteria</i> | <i>Gammaproteobacteria</i>     | <i>Proteobacteria</i>    | <i>Bacteria</i> |
| Otu0703 | 1.03              | 0.44              | 1.13                  | 0.92                | 80.74                | unclass. <i>Gammaproteobacteria</i> | unclass. <i>Gammaproteobacteria</i> | unclass. <i>Gammaproteobacteria</i> | <i>Gammaproteobacteria</i>     | <i>Proteobacteria</i>    | <i>Bacteria</i> |
| Otu0245 | 0.97              | 0.44              | 1.12                  | 0.91                | 81.65                | unclass. <i>Flavobacteriales</i>    | unclass. <i>Flavobacteriales</i>    | <i>Flavobacteriales</i>             | <i>Flavobacteria</i>           | <i>Bacteroidetes</i>     | <i>Bacteria</i> |

| OTU     | Av.A <sub>i</sub> | Av.S <sub>i</sub> | Av.S <sub>i</sub> /SD | Av.S <sub>i</sub> % | ΣAv.S <sub>i</sub> % | Genus                               | Family                              | Order                               | Class                          | Phylum                   | Domain          |
|---------|-------------------|-------------------|-----------------------|---------------------|----------------------|-------------------------------------|-------------------------------------|-------------------------------------|--------------------------------|--------------------------|-----------------|
| Otu0010 | 0.88              | 0.41              | 1.16                  | 0.85                | 82.51                | unclass. <i>Flavobacteriaceae</i>   | <i>Flavobacteriaceae</i>            | <i>Flavobacteriales</i>             | <i>Flavobacteria</i>           | <i>Bacteroidetes</i>     | <i>Bacteria</i> |
| Otu0705 | 1.19              | 0.38              | 0.62                  | 0.79                | 83.3                 | <i>Planctomyces</i>                 | <i>Planctomycetaceae</i>            | <i>Planctomycetales</i>             | <i>Planctomycetacia</i>        | <i>Planctomycetes</i>    | <i>Bacteria</i> |
| Otu0289 | 1.08              | 0.26              | 0.58                  | 0.53                | 83.83                | unclass. <i>Bacteroidetes</i>       | unclass. <i>Bacteroidetes</i>       | unclass. <i>Bacteroidetes</i>       | unclass. <i>Bacteroidetes</i>  | <i>Bacteroidetes</i>     | <i>Bacteria</i> |
| Otu0701 | 0.88              | 0.23              | 0.6                   | 0.49                | 84.32                | unclass. <i>Bacteria</i>            | unclass. <i>Bacteria</i>            | unclass. <i>Bacteria</i>            | unclass. <i>Bacteria</i>       | unclass. <i>Bacteria</i> | <i>Bacteria</i> |
| Otu0084 | 0.93              | 0.23              | 0.6                   | 0.48                | 84.8                 | unclass. <i>Gammaproteobacteria</i> | unclass. <i>Gammaproteobacteria</i> | unclass. <i>Gammaproteobacteria</i> | <i>Gammaproteobacteria</i>     | <i>Proteobacteria</i>    | <i>Bacteria</i> |
| Otu0532 | 0.77              | 0.23              | 0.6                   | 0.48                | 85.28                | unclass. <i>Rhodobacteraceae</i>    | <i>Rhodobacteraceae</i>             | <i>Rhodobacterales</i>              | <i>Alphaproteobacteria</i>     | <i>Proteobacteria</i>    | <i>Bacteria</i> |
| Otu0261 | 0.77              | 0.23              | 0.61                  | 0.48                | 85.77                | <i>Winogradskyella</i>              | <i>Flavobacteriaceae</i>            | <i>Flavobacteriales</i>             | <i>Flavobacteria</i>           | <i>Bacteroidetes</i>     | <i>Bacteria</i> |
| Otu0142 | 0.68              | 0.22              | 0.62                  | 0.46                | 86.22                | unclass. <i>Gammaproteobacteria</i> | unclass. <i>Gammaproteobacteria</i> | unclass. <i>Gammaproteobacteria</i> | <i>Gammaproteobacteria</i>     | <i>Proteobacteria</i>    | <i>Bacteria</i> |
| Otu0504 | 0.68              | 0.22              | 0.62                  | 0.46                | 86.68                | unclass. <i>Alphaproteobacteria</i> | unclass. <i>Alphaproteobacteria</i> | unclass. <i>Alphaproteobacteria</i> | <i>Alphaproteobacteria</i>     | <i>Proteobacteria</i>    | <i>Bacteria</i> |
| Otu0697 | 0.6               | 0.22              | 0.62                  | 0.46                | 87.14                | unclass. <i>Flavobacteriaceae</i>   | <i>Flavobacteriaceae</i>            | <i>Flavobacteriales</i>             | <i>Flavobacteria</i>           | <i>Bacteroidetes</i>     | <i>Bacteria</i> |
| Otu0714 | 0.68              | 0.22              | 0.62                  | 0.46                | 87.59                | unclass. <i>Alphaproteobacteria</i> | unclass. <i>Alphaproteobacteria</i> | unclass. <i>Alphaproteobacteria</i> | <i>Alphaproteobacteria</i>     | <i>Proteobacteria</i>    | <i>Bacteria</i> |
| Otu0696 | 0.68              | 0.21              | 0.62                  | 0.45                | 88.04                | unclass. <i>Flavobacteriaceae</i>   | <i>Flavobacteriaceae</i>            | <i>Flavobacteriales</i>             | <i>Flavobacteria</i>           | <i>Bacteroidetes</i>     | <i>Bacteria</i> |
| Otu0695 | 1.12              | 0.21              | 0.62                  | 0.43                | 88.48                | unclass. <i>Proteobacteria</i>      | unclass. <i>Proteobacteria</i>      | unclass. <i>Proteobacteria</i>      | unclass. <i>Proteobacteria</i> | <i>Proteobacteria</i>    | <i>Bacteria</i> |
| Otu0041 | 0.75              | 0.2               | 0.62                  | 0.42                | 88.9                 | <i>Sulfitobacter</i>                | <i>Rhodobacteraceae</i>             | <i>Rhodobacterales</i>              | <i>Alphaproteobacteria</i>     | <i>Proteobacteria</i>    | <i>Bacteria</i> |
| Otu0408 | 0.75              | 0.2               | 0.62                  | 0.42                | 89.32                | unclass. <i>Flavobacteriaceae</i>   | <i>Flavobacteriaceae</i>            | <i>Flavobacteriales</i>             | <i>Flavobacteria</i>           | <i>Bacteroidetes</i>     | <i>Bacteria</i> |
| Otu0694 | 0.75              | 0.2               | 0.62                  | 0.42                | 89.75                | unclass. <i>Alphaproteobacteria</i> | unclass. <i>Alphaproteobacteria</i> | unclass. <i>Alphaproteobacteria</i> | <i>Alphaproteobacteria</i>     | <i>Proteobacteria</i>    | <i>Bacteria</i> |
| Otu0476 | 0.6               | 0.2               | 0.62                  | 0.42                | 90.17                | unclass. <i>Actinomycetales</i>     | unclass. <i>Actinomycetales</i>     | <i>Actinomycetales</i>              | <i>Actinobacteria</i>          | <i>Actinobacteria</i>    | <i>Bacteria</i> |

Summer 'no dilution' pH 7.67 (average similarity: 49.0%)

|         |       |      |       |       |       |                                     |                                     |                                     |                            |                          |                 |
|---------|-------|------|-------|-------|-------|-------------------------------------|-------------------------------------|-------------------------------------|----------------------------|--------------------------|-----------------|
| Otu0005 | 15.85 | 10.4 | 7.53  | 21.23 | 21.23 | <i>Pelagibacter</i>                 | SAR11-clade                         | <i>Rickettsiales</i>                | <i>Alphaproteobacteria</i> | <i>Proteobacteria</i>    | <i>Bacteria</i> |
| Otu0469 | 3.64  | 2.13 | 3.02  | 4.34  | 25.57 | unclass. <i>Bacteria</i>            | unclass. <i>Bacteria</i>            | unclass. <i>Bacteria</i>            | unclass. <i>Bacteria</i>   | unclass. <i>Bacteria</i> | <i>Bacteria</i> |
| Otu0691 | 2.99  | 1.88 | 3.55  | 3.84  | 29.41 | <i>Planctomyces</i>                 | <i>Planctomycetaceae</i>            | <i>Planctomycetales</i>             | <i>Planctomycetacia</i>    | <i>Planctomycetes</i>    | <i>Bacteria</i> |
| Otu0001 | 3.07  | 1.54 | 2.63  | 3.14  | 32.55 | unclass. <i>Flavobacteriaceae</i>   | <i>Flavobacteriaceae</i>            | <i>Flavobacteriales</i>             | <i>Flavobacteria</i>       | <i>Bacteroidetes</i>     | <i>Bacteria</i> |
| Otu0203 | 3.03  | 1.46 | 2.25  | 2.98  | 35.54 | <i>Pelagibacter</i>                 | SAR11-clade                         | <i>Rickettsiales</i>                | <i>Alphaproteobacteria</i> | <i>Proteobacteria</i>    | <i>Bacteria</i> |
| Otu0084 | 2.23  | 1.43 | 19.17 | 2.92  | 38.45 | unclass. <i>Gammaproteobacteria</i> | unclass. <i>Gammaproteobacteria</i> | unclass. <i>Gammaproteobacteria</i> | <i>Gammaproteobacteria</i> | <i>Proteobacteria</i>    | <i>Bacteria</i> |
| Otu0010 | 2.58  | 1.38 | 4.35  | 2.82  | 41.27 | unclass. <i>Flavobacteriaceae</i>   | <i>Flavobacteriaceae</i>            | <i>Flavobacteriales</i>             | <i>Flavobacteria</i>       | <i>Bacteroidetes</i>     | <i>Bacteria</i> |
| Otu0692 | 2.58  | 1.37 | 4.75  | 2.8   | 44.07 | unclass. <i>Bacteria</i>            | unclass. <i>Bacteria</i>            | unclass. <i>Bacteria</i>            | unclass. <i>Bacteria</i>   | unclass. <i>Bacteria</i> | <i>Bacteria</i> |
| Otu0693 | 2.46  | 1.33 | 6.27  | 2.72  | 46.79 | <i>Planctomyces</i>                 | <i>Planctomycetaceae</i>            | <i>Planctomycetales</i>             | <i>Planctomycetacia</i>    | <i>Planctomycetes</i>    | <i>Bacteria</i> |

| OTU     | Av.A <sub>i</sub> | Av.S <sub>i</sub> | Av.S <sub>i</sub> /SD | Av.S <sub>i</sub> % | ΣAv.S <sub>i</sub> % | Genus                                  | Family                                | Order                                      | Class                          | Phylum                | Domain          |
|---------|-------------------|-------------------|-----------------------|---------------------|----------------------|----------------------------------------|---------------------------------------|--------------------------------------------|--------------------------------|-----------------------|-----------------|
| Otu0003 | 2.58              | 1.32              | 2                     | 2.7                 | 49.49                | unclass. <i>Rhodobacteraceae</i>       | <i>Rhodobacteraceae</i>               | <i>Rhodobacterales</i>                     | <i>Alphaproteobacteria</i>     | <i>Proteobacteria</i> | <i>Bacteria</i> |
| Otu0052 | 2.27              | 1.31              | 4.23                  | 2.67                | 52.15                | unclass. <i>Betaproteobacteria</i>     | unclass. <i>Betaproteobacteria</i>    | unclass. <i>Betaproteobacteria</i>         | <i>Betaproteobacteria</i>      | <i>Proteobacteria</i> | <i>Bacteria</i> |
| Otu0706 | 1.88              | 1.05              | 3.37                  | 2.14                | 54.29                | unclass. <i>Planctomycetaceae</i>      | <i>Planctomycetaceae</i>              | <i>Planctomycetales</i>                    | <i>Planctomycetacia</i>        | <i>Planctomycetes</i> | <i>Bacteria</i> |
| Otu0519 | 1.95              | 1.03              | 8.88                  | 2.11                | 56.4                 | unclass. <i>Rhodospirillaceae</i>      | <i>Rhodospirillaceae</i>              | <i>Rhodospirillales</i>                    | <i>Alphaproteobacteria</i>     | <i>Proteobacteria</i> | <i>Bacteria</i> |
| Otu0002 | 1.81              | 0.91              | 2.51                  | 1.85                | 58.25                | unclass. <i>Flavobacteriaceae</i>      | <i>Flavobacteriaceae</i>              | <i>Flavobacteriales</i>                    | <i>Flavobacteria</i>           | <i>Bacteroidetes</i>  | <i>Bacteria</i> |
| Otu0779 | 2.48              | 0.88              | 1.09                  | 1.8                 | 60.05                | unclass. <i>Ectothiorhodospiraceae</i> | <i>Ectothiorhodospiraceae</i>         | <i>Chromatiales</i>                        | <i>Gammaproteobacteria</i>     | <i>Proteobacteria</i> | <i>Bacteria</i> |
| Otu0277 | 1.56              | 0.87              | 5.66                  | 1.78                | 61.83                | unclass. <i>Flavobacteriaceae</i>      | <i>Flavobacteriaceae</i>              | <i>Flavobacteriales</i>                    | <i>Flavobacteria</i>           | <i>Bacteroidetes</i>  | <i>Bacteria</i> |
| Otu0354 | 1.38              | 0.79              | 4.42                  | 1.61                | 63.45                | <i>Andersenella</i>                    | <i>Rhodobiaceae</i>                   | <i>Rhizobiales</i>                         | <i>Alphaproteobacteria</i>     | <i>Proteobacteria</i> | <i>Bacteria</i> |
| Otu0695 | 1.38              | 0.79              | 4.92                  | 1.61                | 65.06                | unclass. <i>Proteobacteria</i>         | unclass. <i>Proteobacteria</i>        | unclass. <i>Proteobacteria</i>             | unclass. <i>Proteobacteria</i> | <i>Proteobacteria</i> | <i>Bacteria</i> |
| Otu0473 | 1.46              | 0.77              | 5.74                  | 1.57                | 66.63                | unclass. <i>Alphaproteobacteria</i>    | unclass. <i>Alphaproteobacteria</i>   | unclass. <i>Alphaproteobacteria</i>        | <i>Alphaproteobacteria</i>     | <i>Proteobacteria</i> | <i>Bacteria</i> |
| Otu0710 | 1.31              | 0.77              | 5.88                  | 1.57                | 68.2                 | unclass. <i>Gammaproteobacteria</i>    | unclass. <i>Gammaproteobacteria</i>   | unclass. <i>Gammaproteobacteria</i>        | <i>Gammaproteobacteria</i>     | <i>Proteobacteria</i> | <i>Bacteria</i> |
| Otu0503 | 1.41              | 0.76              | 8.69                  | 1.56                | 69.75                | unclass. <i>Bacteroidetes</i>          | unclass. <i>Bacteroidetes</i>         | unclass. <i>Bacteroidetes</i>              | unclass. <i>Bacteroidetes</i>  | <i>Bacteroidetes</i>  | <i>Bacteria</i> |
| Otu0461 | 1.45              | 0.75              | 4.31                  | 1.53                | 71.28                | unclass. <i>Microbacteriaceae</i>      | <i>Microbacteriaceae</i>              | <i>Actinomycetales</i>                     | <i>Actinobacteria</i>          | <i>Actinobacteria</i> | <i>Bacteria</i> |
| Otu0046 | 1.44              | 0.69              | 1.16                  | 1.4                 | 72.68                | unclass. <i>Flavobacteriaceae</i>      | <i>Flavobacteriaceae</i>              | <i>Flavobacteriales</i>                    | <i>Flavobacteria</i>           | <i>Bacteroidetes</i>  | <i>Bacteria</i> |
| Otu0352 | 1.47              | 0.66              | 1.13                  | 1.35                | 74.03                | unclass. <i>Flavobacteriaceae</i>      | <i>Flavobacteriaceae</i>              | <i>Flavobacteriales</i>                    | <i>Flavobacteria</i>           | <i>Bacteroidetes</i>  | <i>Bacteria</i> |
| Otu0053 | 1.25              | 0.56              | 1.16                  | 1.15                | 75.17                | unclass. <i>Rhodobacteraceae</i>       | <i>Rhodobacteraceae</i>               | <i>Rhodobacterales</i>                     | <i>Alphaproteobacteria</i>     | <i>Proteobacteria</i> | <i>Bacteria</i> |
| Otu0495 | 1.11              | 0.5               | 1.13                  | 1.02                | 76.19                | unclass. <i>Flavobacteriales</i>       | unclass. <i>Flavobacteriales</i>      | <i>Flavobacteriales</i>                    | <i>Flavobacteria</i>           | <i>Bacteroidetes</i>  | <i>Bacteria</i> |
| Otu0060 | 1.08              | 0.45              | 1.09                  | 0.92                | 77.11                | unclass. <i>Actinomycetales</i>        | unclass. <i>Actinomycetales</i>       | <i>Actinomycetales</i>                     | <i>Actinobacteria</i>          | <i>Actinobacteria</i> | <i>Bacteria</i> |
| Otu0004 | 1.09              | 0.45              | 1.05                  | 0.91                | 78.03                | unclass. <i>Flavobacteriales</i>       | unclass. <i>Flavobacteriales</i>      | <i>Flavobacteriales</i>                    | <i>Flavobacteria</i>           | <i>Bacteroidetes</i>  | <i>Bacteria</i> |
| Otu0752 | 0.8               | 0.43              | 1.16                  | 0.88                | 78.9                 | unclass. <i>Gammaproteobacteria</i>    | unclass. <i>Gammaproteobacteria</i>   | unclass. <i>Gammaproteobacteria</i>        | <i>Gammaproteobacteria</i>     | <i>Proteobacteria</i> | <i>Bacteria</i> |
| Otu0502 | 1.13              | 0.43              | 1.12                  | 0.87                | 79.77                | unclass. <i>Gammaproteobacteria</i>    | unclass. <i>Gammaproteobacteria</i>   | unclass. <i>Gammaproteobacteria</i>        | <i>Gammaproteobacteria</i>     | <i>Proteobacteria</i> | <i>Bacteria</i> |
| Otu0463 | 1.37              | 0.4               | 0.62                  | 0.82                | 80.59                | unclass. <i>Flavobacteriaceae</i>      | <i>Flavobacteriaceae</i>              | <i>Flavobacteriales</i>                    | <i>Flavobacteria</i>           | <i>Bacteroidetes</i>  | <i>Bacteria</i> |
| Otu0704 | 0.88              | 0.4               | 1.16                  | 0.81                | 81.4                 | unclass. <i>Proteobacteria</i>         | unclass. <i>Proteobacteria</i>        | unclass. <i>Proteobacteria</i>             | unclass. <i>Proteobacteria</i> | <i>Proteobacteria</i> | <i>Bacteria</i> |
| Otu0708 | 0.8               | 0.4               | 1.16                  | 0.81                | 82.2                 | unclass. <i>Proteobacteria</i>         | unclass. <i>Proteobacteria</i>        | unclass. <i>Proteobacteria</i>             | unclass. <i>Proteobacteria</i> | <i>Proteobacteria</i> | <i>Bacteria</i> |
| Otu0480 | 0.98              | 0.34              | 0.62                  | 0.69                | 82.89                | <i>Ilumatobacter</i>                   | <i>Acidimicrobidae_incertae_sedis</i> | <i>Actinobacteria_order_incertae_sedis</i> | <i>Actinobacteria</i>          | <i>Actinobacteria</i> | <i>Bacteria</i> |
| Otu0007 | 1.13              | 0.32              | 0.61                  | 0.66                | 83.55                | unclass. <i>Flavobacteriales</i>       | unclass. <i>Flavobacteriales</i>      | <i>Flavobacteriales</i>                    | <i>Flavobacteria</i>           | <i>Bacteroidetes</i>  | <i>Bacteria</i> |
| Otu0245 | 0.98              | 0.3               | 0.62                  | 0.62                | 84.17                | unclass. <i>Flavobacteriales</i>       | unclass. <i>Flavobacteriales</i>      | <i>Flavobacteriales</i>                    | <i>Flavobacteria</i>           | <i>Bacteroidetes</i>  | <i>Bacteria</i> |

| OTU                                                                    | Av.A <sub>i</sub> | Av.S <sub>i</sub> | Av.S <sub>i</sub> /SD | Av.S <sub>i</sub> % | ∑Av.S <sub>i</sub> % | Genus                               | Family                              | Order                               | Class                        | Phylum                 | Domain          |
|------------------------------------------------------------------------|-------------------|-------------------|-----------------------|---------------------|----------------------|-------------------------------------|-------------------------------------|-------------------------------------|------------------------------|------------------------|-----------------|
| Otu0450                                                                | 1.2               | 0.28              | 0.62                  | 0.58                | 84.74                | <i>Sphingobium</i>                  | <i>Sphingomonadaceae</i>            | <i>Sphingomonadales</i>             | <i>Alphaproteobacteria</i>   | <i>Proteobacteria</i>  | <i>Bacteria</i> |
| Otu0490                                                                | 0.91              | 0.28              | 0.62                  | 0.58                | 85.32                | unclass. <i>Burkholderiales</i>     | unclass. <i>Burkholderiales</i>     | <i>Burkholderiales</i>              | <i>Betaproteobacteria</i>    | <i>Proteobacteria</i>  | <i>Bacteria</i> |
| Otu0512                                                                | 0.89              | 0.26              | 0.58                  | 0.53                | 85.85                | <i>Rhodopirellula</i>               | <i>Planctomycetaceae</i>            | <i>Planctomycetales</i>             | <i>Planctomycetacia</i>      | <i>Planctomycetes</i>  | <i>Bacteria</i> |
| Otu0142                                                                | 0.83              | 0.25              | 0.61                  | 0.51                | 86.36                | unclass. <i>Gammaproteobacteria</i> | unclass. <i>Gammaproteobacteria</i> | unclass. <i>Gammaproteobacteria</i> | <i>Gammaproteobacteria</i>   | <i>Proteobacteria</i>  | <i>Bacteria</i> |
| Otu0261                                                                | 0.99              | 0.23              | 0.58                  | 0.48                | 86.84                | <i>Winogradskyella</i>              | <i>Flavobacteriaceae</i>            | <i>Flavobacteriales</i>             | <i>Flavobacteria</i>         | <i>Bacteroidetes</i>   | <i>Bacteria</i> |
| Otu0521                                                                | 0.77              | 0.23              | 0.61                  | 0.48                | 87.31                | unclass. <i>Rhodobacteraceae</i>    | <i>Rhodobacteraceae</i>             | <i>Rhodobacterales</i>              | <i>Alphaproteobacteria</i>   | <i>Proteobacteria</i>  | <i>Bacteria</i> |
| Otu0468                                                                | 0.88              | 0.23              | 0.6                   | 0.47                | 87.78                | unclass. <i>Flavobacteriaceae</i>   | <i>Flavobacteriaceae</i>            | <i>Flavobacteriales</i>             | <i>Flavobacteria</i>         | <i>Bacteroidetes</i>   | <i>Bacteria</i> |
| Otu0759                                                                | 0.77              | 0.23              | 0.61                  | 0.47                | 88.25                | unclass. <i>Verrucomicrobiaceae</i> | <i>Verrucomicrobiaceae</i>          | <i>Verrucomicrobiales</i>           | <i>Verrucomicrobiae</i>      | <i>Verrucomicrobia</i> | <i>Bacteria</i> |
| Otu0510                                                                | 0.77              | 0.23              | 0.61                  | 0.47                | 88.71                | unclass. <i>Gammaproteobacteria</i> | unclass. <i>Gammaproteobacteria</i> | unclass. <i>Gammaproteobacteria</i> | <i>Gammaproteobacteria</i>   | <i>Proteobacteria</i>  | <i>Bacteria</i> |
| Otu0782                                                                | 0.77              | 0.23              | 0.62                  | 0.46                | 89.18                | unclass. <i>Gammaproteobacteria</i> | unclass. <i>Gammaproteobacteria</i> | unclass. <i>Gammaproteobacteria</i> | <i>Gammaproteobacteria</i>   | <i>Proteobacteria</i>  | <i>Bacteria</i> |
| Otu0347                                                                | 0.6               | 0.22              | 0.62                  | 0.45                | 89.63                | unclass. <i>Flavobacteriaceae</i>   | <i>Flavobacteriaceae</i>            | <i>Flavobacteriales</i>             | <i>Flavobacteria</i>         | <i>Bacteroidetes</i>   | <i>Bacteria</i> |
| Otu0019                                                                | 0.6               | 0.22              | 0.62                  | 0.45                | 90.08                | unclass. <i>Gammaproteobacteria</i> | unclass. <i>Gammaproteobacteria</i> | unclass. <i>Gammaproteobacteria</i> | <i>Gammaproteobacteria</i>   | <i>Proteobacteria</i>  | <i>Bacteria</i> |
| Summer 'serial dilution' pH <i>in situ</i> (average similarity: 47.1%) |                   |                   |                       |                     |                      |                                     |                                     |                                     |                              |                        |                 |
| Otu0132                                                                | 11.11             | 9.97              | 1.14                  | 21.16               | 21.16                | unclass. <i>Alteromonadales</i>     | unclass. <i>Alteromonadales</i>     | <i>Alteromonadales</i>              | <i>Gammaproteobacteria</i>   | <i>Proteobacteria</i>  | <i>Bacteria</i> |
| Otu0459                                                                | 10.06             | 9.08              | 1.31                  | 19.28               | 40.44                | <i>Croceibacter</i>                 | <i>Flavobacteriaceae</i>            | <i>Flavobacteriales</i>             | <i>Flavobacteria</i>         | <i>Bacteroidetes</i>   | <i>Bacteria</i> |
| Otu0471                                                                | 6.52              | 7.15              | 1.74                  | 15.18               | 55.63                | <i>Oceaniserpentilla</i>            | <i>Oceanospirillaceae</i>           | <i>Oceanospirillales</i>            | <i>Gammaproteobacteria</i>   | <i>Proteobacteria</i>  | <i>Bacteria</i> |
| Otu0125                                                                | 4.15              | 3.1               | 1.06                  | 6.59                | 62.21                | <i>Leeuwenhoekella</i>              | <i>Flavobacteriaceae</i>            | <i>Flavobacteriales</i>             | <i>Flavobacteria</i>         | <i>Bacteroidetes</i>   | <i>Bacteria</i> |
| Otu0521                                                                | 4.58              | 2.85              | 1.09                  | 6.05                | 68.26                | unclass. <i>Rhodobacteraceae</i>    | <i>Rhodobacteraceae</i>             | <i>Rhodobacterales</i>              | <i>Alphaproteobacteria</i>   | <i>Proteobacteria</i>  | <i>Bacteria</i> |
| Otu0525                                                                | 2.2               | 2.11              | 1.79                  | 4.48                | 72.74                | <i>Reinekea</i>                     | <i>Oceanospirillaceae</i>           | <i>Oceanospirillales</i>            | <i>Gammaproteobacteria</i>   | <i>Proteobacteria</i>  | <i>Bacteria</i> |
| Otu0523                                                                | 2.3               | 1.6               | 1.01                  | 3.39                | 76.13                | <i>Pseudidiomarina</i>              | <i>Idiomarinaceae</i>               | <i>Alteromonadales</i>              | <i>Gammaproteobacteria</i>   | <i>Proteobacteria</i>  | <i>Bacteria</i> |
| Otu0524                                                                | 1.85              | 1.51              | 1.13                  | 3.21                | 79.35                | <i>Pseudidiomarina</i>              | <i>Idiomarinaceae</i>               | <i>Alteromonadales</i>              | <i>Gammaproteobacteria</i>   | <i>Proteobacteria</i>  | <i>Bacteria</i> |
| Otu0460                                                                | 3.42              | 1.51              | 0.82                  | 3.21                | 82.56                | <i>Arcobacter</i>                   | <i>Campylobacteraceae</i>           | <i>Campylobacterales</i>            | <i>Epsilonproteobacteria</i> | <i>Proteobacteria</i>  | <i>Bacteria</i> |
| Otu0522                                                                | 1.75              | 1.4               | 1.14                  | 2.97                | 85.53                | unclass. <i>Flavobacteriaceae</i>   | <i>Flavobacteriaceae</i>            | <i>Flavobacteriales</i>             | <i>Flavobacteria</i>         | <i>Bacteroidetes</i>   | <i>Bacteria</i> |
| Otu0531                                                                | 1.7               | 1.16              | 1.1                   | 2.46                | 87.99                | unclass. <i>Flavobacteriaceae</i>   | <i>Flavobacteriaceae</i>            | <i>Flavobacteriales</i>             | <i>Flavobacteria</i>         | <i>Bacteroidetes</i>   | <i>Bacteria</i> |
| Otu0537                                                                | 1.38              | 1.08              | 1.14                  | 2.29                | 90.28                | unclass. <i>Flavobacteriaceae</i>   | <i>Flavobacteriaceae</i>            | <i>Flavobacteriales</i>             | <i>Flavobacteria</i>         | <i>Bacteroidetes</i>   | <i>Bacteria</i> |
| Summer 'serial dilution' pH 7.67 (average similarity: 63.1%)           |                   |                   |                       |                     |                      |                                     |                                     |                                     |                              |                        |                 |
| Otu0471                                                                | 13.99             | 21.82             | 3.37                  | 34.59               | 34.59                | <i>Oceaniserpentilla</i>            | <i>Oceanospirillaceae</i>           | <i>Oceanospirillales</i>            | <i>Gammaproteobacteria</i>   | <i>Proteobacteria</i>  | <i>Bacteria</i> |



| OTU                                                                     | Av.A <sub>i</sub> | Av.S <sub>i</sub> | Av.S <sub>i</sub> /SD | Av.S <sub>i</sub> % | ΣAv.S <sub>i</sub> % | Genus                               | Family                              | Order                               | Class                        | Phylum                | Domain          |
|-------------------------------------------------------------------------|-------------------|-------------------|-----------------------|---------------------|----------------------|-------------------------------------|-------------------------------------|-------------------------------------|------------------------------|-----------------------|-----------------|
| Otu0132                                                                 | 13.17             | 19.12             | 2.01                  | 30.31               | 64.9                 | unclass. <i>Alteromonadales</i>     | unclass. <i>Alteromonadales</i>     | <i>Alteromonadales</i>              | <i>Gammaproteobacteria</i>   | <i>Proteobacteria</i> | <i>Bacteria</i> |
| Otu0525                                                                 | 6.66              | 10.29             | 4.22                  | 16.31               | 81.2                 | <i>Reinekea</i>                     | <i>Oceanospirillaceae</i>           | <i>Oceanospirillales</i>            | <i>Gammaproteobacteria</i>   | <i>Proteobacteria</i> | <i>Bacteria</i> |
| Otu0533                                                                 | 2.33              | 3.16              | 6.16                  | 5.01                | 86.22                | <i>Nisaea</i>                       | <i>Rhodospirillaceae</i>            | <i>Rhodospirillales</i>             | <i>Alphaproteobacteria</i>   | <i>Proteobacteria</i> | <i>Bacteria</i> |
| Otu0180                                                                 | 1.45              | 2.12              | 3.85                  | 3.36                | 89.57                | <i>Reichenbachella</i>              | <i>Flammeovirgaceae</i>             | <i>Sphingobacteriales</i>           | <i>Sphingobacteria</i>       | <i>Bacteroidetes</i>  | <i>Bacteria</i> |
| Otu0531                                                                 | 0.88              | 1.17              | 1.15                  | 1.85                | 91.43                | unclass. <i>Flavobacteriaceae</i>   | <i>Flavobacteriaceae</i>            | <i>Flavobacteriales</i>             | <i>Flavobacteria</i>         | <i>Bacteroidetes</i>  | <i>Bacteria</i> |
| Summer 'initial dilution' pH <i>in situ</i> (average similarity: 55.6%) |                   |                   |                       |                     |                      |                                     |                                     |                                     |                              |                       |                 |
| Otu0109                                                                 | 18.3              | 18.69             | 9.04                  | 33.63               | 33.63                | <i>Alteromonas</i>                  | <i>Alteromonadaceae</i>             | <i>Alteromonadales</i>              | <i>Gammaproteobacteria</i>   | <i>Proteobacteria</i> | <i>Bacteria</i> |
| Otu0035                                                                 | 3.47              | 3.14              | 3.93                  | 5.64                | 39.28                | <i>Colwellia</i>                    | <i>Colwelliaceae</i>                | <i>Alteromonadales</i>              | <i>Gammaproteobacteria</i>   | <i>Proteobacteria</i> | <i>Bacteria</i> |
| Otu0041                                                                 | 3.93              | 3.09              | 4.81                  | 5.56                | 44.84                | <i>Sulfitobacter</i>                | <i>Rhodobacteraceae</i>             | <i>Rhodobacterales</i>              | <i>Alphaproteobacteria</i>   | <i>Proteobacteria</i> | <i>Bacteria</i> |
| Otu0521                                                                 | 3.2               | 2.25              | 1.12                  | 4.05                | 48.89                | unclass. <i>Rhodobacteraceae</i>    | <i>Rhodobacteraceae</i>             | <i>Rhodobacterales</i>              | <i>Alphaproteobacteria</i>   | <i>Proteobacteria</i> | <i>Bacteria</i> |
| Otu0487                                                                 | 2.26              | 2.12              | 7.33                  | 3.81                | 52.7                 | unclass. <i>Chitinophagaceae</i>    | <i>Chitinophagaceae</i>             | <i>Sphingobacteriales</i>           | <i>Sphingobacteria</i>       | <i>Bacteroidetes</i>  | <i>Bacteria</i> |
| Otu0115                                                                 | 2.35              | 2.1               | 5.41                  | 3.77                | 56.48                | <i>Glaciicola</i>                   | <i>Alteromonadaceae</i>             | <i>Alteromonadales</i>              | <i>Gammaproteobacteria</i>   | <i>Proteobacteria</i> | <i>Bacteria</i> |
| Otu0532                                                                 | 2.73              | 2.06              | 2.06                  | 3.71                | 60.19                | unclass. <i>Rhodobacteraceae</i>    | <i>Rhodobacteraceae</i>             | <i>Rhodobacterales</i>              | <i>Alphaproteobacteria</i>   | <i>Proteobacteria</i> | <i>Bacteria</i> |
| Otu0027                                                                 | 2.28              | 1.57              | 3.16                  | 2.83                | 63.02                | <i>Pseudoalteromonas</i>            | <i>Pseudoalteromonadaceae</i>       | <i>Alteromonadales</i>              | <i>Gammaproteobacteria</i>   | <i>Proteobacteria</i> | <i>Bacteria</i> |
| Otu0588                                                                 | 1.8               | 1.49              | 4.44                  | 2.69                | 65.7                 | <i>Amphritea</i>                    | <i>Oceanospirillaceae</i>           | <i>Oceanospirillales</i>            | <i>Gammaproteobacteria</i>   | <i>Proteobacteria</i> | <i>Bacteria</i> |
| Otu0525                                                                 | 1.62              | 1.42              | 3.8                   | 2.55                | 68.26                | <i>Reinekea</i>                     | <i>Oceanospirillaceae</i>           | <i>Oceanospirillales</i>            | <i>Gammaproteobacteria</i>   | <i>Proteobacteria</i> | <i>Bacteria</i> |
| Otu0553                                                                 | 1.75              | 1.4               | 3.98                  | 2.51                | 70.77                | <i>Vibrio</i>                       | <i>Vibrionaceae</i>                 | <i>Vibrionales</i>                  | <i>Gammaproteobacteria</i>   | <i>Proteobacteria</i> | <i>Bacteria</i> |
| Otu0110                                                                 | 2.08              | 1.33              | 1.15                  | 2.4                 | 73.17                | unclass. <i>Rhodobacteraceae</i>    | <i>Rhodobacteraceae</i>             | <i>Rhodobacterales</i>              | <i>Alphaproteobacteria</i>   | <i>Proteobacteria</i> | <i>Bacteria</i> |
| Otu0576                                                                 | 1.81              | 1.31              | 2.53                  | 2.35                | 75.52                | unclass. <i>Alphaproteobacteria</i> | unclass. <i>Alphaproteobacteria</i> | unclass. <i>Alphaproteobacteria</i> | <i>Alphaproteobacteria</i>   | <i>Proteobacteria</i> | <i>Bacteria</i> |
| Otu0583                                                                 | 1.17              | 1.1               | 6.61                  | 1.97                | 77.49                | unclass. <i>Flavobacteriaceae</i>   | <i>Flavobacteriaceae</i>            | <i>Flavobacteriales</i>             | <i>Flavobacteria</i>         | <i>Bacteroidetes</i>  | <i>Bacteria</i> |
| Otu0489                                                                 | 1                 | 1.05              | 10.72                 | 1.89                | 79.38                | unclass. <i>Vibrionaceae</i>        | <i>Vibrionaceae</i>                 | <i>Vibrionales</i>                  | <i>Gammaproteobacteria</i>   | <i>Proteobacteria</i> | <i>Bacteria</i> |
| Otu0551                                                                 | 1.57              | 0.96              | 1.05                  | 1.73                | 81.11                | <i>Arcobacter</i>                   | <i>Campylobacteraceae</i>           | <i>Campylobacterales</i>            | <i>Epsilonproteobacteria</i> | <i>Proteobacteria</i> | <i>Bacteria</i> |
| Otu0261                                                                 | 1.24              | 0.81              | 1.1                   | 1.46                | 82.57                | <i>Winogradskyella</i>              | <i>Flavobacteriaceae</i>            | <i>Flavobacteriales</i>             | <i>Flavobacteria</i>         | <i>Bacteroidetes</i>  | <i>Bacteria</i> |
| Otu0542                                                                 | 1.09              | 0.67              | 1.11                  | 1.21                | 83.77                | unclass. <i>Oceanospirillaceae</i>  | <i>Oceanospirillaceae</i>           | <i>Oceanospirillales</i>            | <i>Gammaproteobacteria</i>   | <i>Proteobacteria</i> | <i>Bacteria</i> |
| Otu0578                                                                 | 0.97              | 0.65              | 1.11                  | 1.16                | 84.94                | <i>Winogradskyella</i>              | <i>Flavobacteriaceae</i>            | <i>Flavobacteriales</i>             | <i>Flavobacteria</i>         | <i>Bacteroidetes</i>  | <i>Bacteria</i> |
| Otu0599                                                                 | 0.8               | 0.65              | 1.15                  | 1.16                | 86.1                 | <i>Winogradskyella</i>              | <i>Flavobacteriaceae</i>            | <i>Flavobacteriales</i>             | <i>Flavobacteria</i>         | <i>Bacteroidetes</i>  | <i>Bacteria</i> |

| OTU                                                           | Av.A <sub>i</sub> | Av.S <sub>i</sub> | Av.S <sub>i</sub> /SD | Av.S <sub>i</sub> % | ΣAv.S <sub>i</sub> % | Genus                               | Family                              | Order                               | Class                        | Phylum                | Domain          |
|---------------------------------------------------------------|-------------------|-------------------|-----------------------|---------------------|----------------------|-------------------------------------|-------------------------------------|-------------------------------------|------------------------------|-----------------------|-----------------|
| Otu0036                                                       | 0.95              | 0.61              | 1.15                  | 1.09                | 87.19                | <i>Glaciecola</i>                   | <i>Alteromonadaceae</i>             | <i>Alteromonadales</i>              | <i>Gammaproteobacteria</i>   | <i>Proteobacteria</i> | <i>Bacteria</i> |
| Otu0460                                                       | 1.32              | 0.61              | 1.15                  | 1.09                | 88.28                | <i>Arcobacter</i>                   | <i>Campylobacteraceae</i>           | <i>Campylobacterales</i>            | <i>Epsilonproteobacteria</i> | <i>Proteobacteria</i> | <i>Bacteria</i> |
| Otu0533                                                       | 0.95              | 0.6               | 1.16                  | 1.08                | 89.37                | <i>Nisaea</i>                       | <i>Rhodospirillaceae</i>            | <i>Rhodospirillales</i>             | <i>Alphaproteobacteria</i>   | <i>Proteobacteria</i> | <i>Bacteria</i> |
| Otu0107                                                       | 1.25              | 0.49              | 0.6                   | 0.89                | 90.26                | unclass. <i>Rhodobacteraceae</i>    | <i>Rhodobacteraceae</i>             | <i>Rhodobacterales</i>              | <i>Alphaproteobacteria</i>   | <i>Proteobacteria</i> | <i>Bacteria</i> |
| Summer 'initial dilution' pH 7.67 (average similarity: 55.0%) |                   |                   |                       |                     |                      |                                     |                                     |                                     |                              |                       |                 |
| Otu0109                                                       | 14.05             | 10.62             | 7.03                  | 19.32               | 19.32                | <i>Alteromonas</i>                  | <i>Alteromonadaceae</i>             | <i>Alteromonadales</i>              | <i>Gammaproteobacteria</i>   | <i>Proteobacteria</i> | <i>Bacteria</i> |
| Otu0551                                                       | 6.75              | 3.77              | 4.9                   | 6.86                | 26.18                | <i>Arcobacter</i>                   | <i>Campylobacteraceae</i>           | <i>Campylobacterales</i>            | <i>Epsilonproteobacteria</i> | <i>Proteobacteria</i> | <i>Bacteria</i> |
| Otu0588                                                       | 4.34              | 3.05              | 3.45                  | 5.56                | 31.73                | <i>Amphritea</i>                    | <i>Oceanospirillaceae</i>           | <i>Oceanospirillales</i>            | <i>Gammaproteobacteria</i>   | <i>Proteobacteria</i> | <i>Bacteria</i> |
| Otu0027                                                       | 3.93              | 2.86              | 17.05                 | 5.2                 | 36.93                | <i>Pseudoalteromonas</i>            | <i>Pseudoalteromonadaceae</i>       | <i>Alteromonadales</i>              | <i>Gammaproteobacteria</i>   | <i>Proteobacteria</i> | <i>Bacteria</i> |
| Otu0576                                                       | 3.39              | 2.38              | 5.81                  | 4.34                | 41.27                | unclass. <i>Alphaproteobacteria</i> | unclass. <i>Alphaproteobacteria</i> | unclass. <i>Alphaproteobacteria</i> | <i>Alphaproteobacteria</i>   | <i>Proteobacteria</i> | <i>Bacteria</i> |
| Otu0115                                                       | 2.56              | 1.87              | 2.44                  | 3.4                 | 44.67                | <i>Glaciecola</i>                   | <i>Alteromonadaceae</i>             | <i>Alteromonadales</i>              | <i>Gammaproteobacteria</i>   | <i>Proteobacteria</i> | <i>Bacteria</i> |
| Otu0035                                                       | 2.9               | 1.75              | 4.93                  | 3.18                | 47.84                | <i>Colwellia</i>                    | <i>Colwelliaceae</i>                | <i>Alteromonadales</i>              | <i>Gammaproteobacteria</i>   | <i>Proteobacteria</i> | <i>Bacteria</i> |
| Otu0487                                                       | 2.54              | 1.74              | 5.15                  | 3.17                | 51.02                | unclass. <i>Chitinophagaceae</i>    | <i>Chitinophagaceae</i>             | <i>Sphingobacteriales</i>           | <i>Sphingobacteria</i>       | <i>Bacteroidetes</i>  | <i>Bacteria</i> |
| Otu0532                                                       | 2.64              | 1.72              | 2.6                   | 3.13                | 54.15                | unclass. <i>Rhodobacteraceae</i>    | <i>Rhodobacteraceae</i>             | <i>Rhodobacterales</i>              | <i>Alphaproteobacteria</i>   | <i>Proteobacteria</i> | <i>Bacteria</i> |
| Otu0583                                                       | 2.84              | 1.62              | 1.63                  | 2.95                | 57.1                 | unclass. <i>Flavobacteriaceae</i>   | <i>Flavobacteriaceae</i>            | <i>Flavobacteriales</i>             | <i>Flavobacteria</i>         | <i>Bacteroidetes</i>  | <i>Bacteria</i> |
| Otu0553                                                       | 2.25              | 1.44              | 2.02                  | 2.62                | 59.73                | <i>Vibrio</i>                       | <i>Vibrionaceae</i>                 | <i>Vibrionales</i>                  | <i>Gammaproteobacteria</i>   | <i>Proteobacteria</i> | <i>Bacteria</i> |
| Otu0525                                                       | 2.36              | 1.44              | 2.18                  | 2.61                | 62.34                | <i>Reinekea</i>                     | <i>Oceanospirillaceae</i>           | <i>Oceanospirillales</i>            | <i>Gammaproteobacteria</i>   | <i>Proteobacteria</i> | <i>Bacteria</i> |
| Otu0489                                                       | 2.2               | 1.4               | 2.15                  | 2.54                | 64.88                | unclass. <i>Vibrionaceae</i>        | <i>Vibrionaceae</i>                 | <i>Vibrionales</i>                  | <i>Gammaproteobacteria</i>   | <i>Proteobacteria</i> | <i>Bacteria</i> |
| Otu0578                                                       | 2.18              | 1.38              | 1.8                   | 2.51                | 67.4                 | <i>Winogradskyella</i>              | <i>Flavobacteriaceae</i>            | <i>Flavobacteriales</i>             | <i>Flavobacteria</i>         | <i>Bacteroidetes</i>  | <i>Bacteria</i> |
| Otu0041                                                       | 2.89              | 1.32              | 0.91                  | 2.41                | 69.8                 | <i>Sulfitobacter</i>                | <i>Rhodobacteraceae</i>             | <i>Rhodobacterales</i>              | <i>Alphaproteobacteria</i>   | <i>Proteobacteria</i> | <i>Bacteria</i> |
| Otu0261                                                       | 1.77              | 1.22              | 18.19                 | 2.21                | 72.02                | <i>Winogradskyella</i>              | <i>Flavobacteriaceae</i>            | <i>Flavobacteriales</i>             | <i>Flavobacteria</i>         | <i>Bacteroidetes</i>  | <i>Bacteria</i> |
| Otu0107                                                       | 1.72              | 1.11              | 3.76                  | 2.03                | 74.04                | unclass. <i>Rhodobacteraceae</i>    | <i>Rhodobacteraceae</i>             | <i>Rhodobacterales</i>              | <i>Alphaproteobacteria</i>   | <i>Proteobacteria</i> | <i>Bacteria</i> |
| Otu0521                                                       | 1.98              | 1.07              | 0.91                  | 1.94                | 75.99                | unclass. <i>Rhodobacteraceae</i>    | <i>Rhodobacteraceae</i>             | <i>Rhodobacterales</i>              | <i>Alphaproteobacteria</i>   | <i>Proteobacteria</i> | <i>Bacteria</i> |
| Otu0580                                                       | 1.37              | 0.96              | 3.9                   | 1.75                | 77.74                | <i>Neptuniibacter</i>               | <i>Oceanospirillaceae</i>           | <i>Oceanospirillales</i>            | <i>Gammaproteobacteria</i>   | <i>Proteobacteria</i> | <i>Bacteria</i> |
| Otu0072                                                       | 1.29              | 0.92              | 4.71                  | 1.68                | 79.42                | <i>Sulfitobacter</i>                | <i>Rhodobacteraceae</i>             | <i>Rhodobacterales</i>              | <i>Alphaproteobacteria</i>   | <i>Proteobacteria</i> | <i>Bacteria</i> |
| Otu0460                                                       | 1.51              | 0.91              | 8.54                  | 1.66                | 81.08                | <i>Arcobacter</i>                   | <i>Campylobacteraceae</i>           | <i>Campylobacterales</i>            | <i>Epsilonproteobacteria</i> | <i>Proteobacteria</i> | <i>Bacteria</i> |
| Otu0615                                                       | 1.29              | 0.91              | 8.54                  | 1.66                | 82.75                | <i>Neptuniibacter</i>               | <i>Oceanospirillaceae</i>           | <i>Oceanospirillales</i>            | <i>Gammaproteobacteria</i>   | <i>Proteobacteria</i> | <i>Bacteria</i> |

| OTU                                                                | Av.A <sub>i</sub> | Av.S <sub>i</sub> | Av.S <sub>i</sub> /SD | Av.S <sub>i</sub> % | ∑Av.S <sub>i</sub> % | Genus                               | Family                              | Order                               | Class                          | Phylum                   | Domain          |
|--------------------------------------------------------------------|-------------------|-------------------|-----------------------|---------------------|----------------------|-------------------------------------|-------------------------------------|-------------------------------------|--------------------------------|--------------------------|-----------------|
| Otu0536                                                            | 1.1               | 0.86              | 18.19                 | 1.56                | 84.31                | <i>Maribacter</i>                   | <i>Flavobacteriaceae</i>            | <i>Flavobacteriales</i>             | <i>Flavobacteria</i>           | <i>Bacteroidetes</i>     | <i>Bacteria</i> |
| Otu0533                                                            | 1.62              | 0.71              | 0.89                  | 1.29                | 85.6                 | <i>Nisaea</i>                       | <i>Rhodospirillaceae</i>            | <i>Rhodospirillales</i>             | <i>Alphaproteobacteria</i>     | <i>Proteobacteria</i>    | <i>Bacteria</i> |
| Otu0608                                                            | 1.21              | 0.58              | 0.91                  | 1.06                | 86.66                | unclass. <i>Flavobacteriaceae</i>   | <i>Flavobacteriaceae</i>            | <i>Flavobacteriales</i>             | <i>Flavobacteria</i>           | <i>Bacteroidetes</i>     | <i>Bacteria</i> |
| Otu0234                                                            | 2.68              | 0.58              | 0.8                   | 1.05                | 87.71                | <i>Arcobacter</i>                   | <i>Campylobacteraceae</i>           | <i>Campylobacterales</i>            | <i>Epsilonproteobacteria</i>   | <i>Proteobacteria</i>    | <i>Bacteria</i> |
| Otu0346                                                            | 1.56              | 0.58              | 0.8                   | 1.05                | 88.76                | unclass. <i>Bacteria</i>            | unclass. <i>Bacteria</i>            | unclass. <i>Bacteria</i>            | unclass. <i>Bacteria</i>       | unclass. <i>Bacteria</i> | <i>Bacteria</i> |
| Otu0459                                                            | 1.22              | 0.48              | 0.88                  | 0.88                | 89.64                | <i>Croceibacter</i>                 | <i>Flavobacteriaceae</i>            | <i>Flavobacteriales</i>             | <i>Flavobacteria</i>           | <i>Bacteroidetes</i>     | <i>Bacteria</i> |
| Otu0110                                                            | 0.85              | 0.44              | 0.91                  | 0.8                 | 90.45                | unclass. <i>Rhodobacteraceae</i>    | <i>Rhodobacteraceae</i>             | <i>Rhodobacterales</i>              | <i>Alphaproteobacteria</i>     | <i>Proteobacteria</i>    | <i>Bacteria</i> |
| Autumn 'no dilution' pH <i>in situ</i> (average similarity: 47.1%) |                   |                   |                       |                     |                      |                                     |                                     |                                     |                                |                          |                 |
| Otu1090                                                            | 5.7               | 2.07              | 11.11                 | 4.4                 | 4.4                  | unclass. <i>Bacteria</i>            | unclass. <i>Bacteria</i>            | unclass. <i>Bacteria</i>            | unclass. <i>Bacteria</i>       | unclass. <i>Bacteria</i> | <i>Bacteria</i> |
| Otu0068                                                            | 3.94              | 1.51              | 8.64                  | 3.21                | 7.61                 | <i>Pelagibacter</i>                 | SAR11-clade                         | <i>Rickettsiales</i>                | <i>Alphaproteobacteria</i>     | <i>Proteobacteria</i>    | <i>Bacteria</i> |
| Otu0053                                                            | 3.86              | 1.44              | 5.37                  | 3.05                | 10.66                | unclass. <i>Rhodobacteraceae</i>    | <i>Rhodobacteraceae</i>             | <i>Rhodobacterales</i>              | <i>Alphaproteobacteria</i>     | <i>Proteobacteria</i>    | <i>Bacteria</i> |
| Otu1091                                                            | 3.7               | 1.34              | 9.27                  | 2.84                | 13.5                 | unclass. <i>Flavobacteriaceae</i>   | <i>Flavobacteriaceae</i>            | <i>Flavobacteriales</i>             | <i>Flavobacteria</i>           | <i>Bacteroidetes</i>     | <i>Bacteria</i> |
| Otu0823                                                            | 3.6               | 1.33              | 7.21                  | 2.82                | 16.33                | unclass. <i>Legionellaceae</i>      | <i>Legionellaceae</i>               | <i>Legionellales</i>                | <i>Gammaproteobacteria</i>     | <i>Proteobacteria</i>    | <i>Bacteria</i> |
| Otu0001                                                            | 4.28              | 1.22              | 2.44                  | 2.58                | 18.91                | unclass. <i>Flavobacteriaceae</i>   | <i>Flavobacteriaceae</i>            | <i>Flavobacteriales</i>             | <i>Flavobacteria</i>           | <i>Bacteroidetes</i>     | <i>Bacteria</i> |
| Otu0005                                                            | 4.32              | 1.18              | 2.18                  | 2.49                | 21.4                 | <i>Pelagibacter</i>                 | SAR11-clade                         | <i>Rickettsiales</i>                | <i>Alphaproteobacteria</i>     | <i>Proteobacteria</i>    | <i>Bacteria</i> |
| Otu0714                                                            | 3.04              | 1.14              | 6.85                  | 2.42                | 23.83                | unclass. <i>Alphaproteobacteria</i> | unclass. <i>Alphaproteobacteria</i> | unclass. <i>Alphaproteobacteria</i> | <i>Alphaproteobacteria</i>     | <i>Proteobacteria</i>    | <i>Bacteria</i> |
| Otu1094                                                            | 2.68              | 1.08              | 18.31                 | 2.29                | 26.11                | unclass. <i>Bacteroidetes</i>       | unclass. <i>Bacteroidetes</i>       | unclass. <i>Bacteroidetes</i>       | unclass. <i>Bacteroidetes</i>  | <i>Bacteroidetes</i>     | <i>Bacteria</i> |
| Otu0272                                                            | 3.28              | 1.04              | 1.84                  | 2.21                | 28.32                | unclass. <i>Flavobacteriaceae</i>   | <i>Flavobacteriaceae</i>            | <i>Flavobacteriales</i>             | <i>Flavobacteria</i>           | <i>Bacteroidetes</i>     | <i>Bacteria</i> |
| Otu0408                                                            | 2.67              | 1.03              | 28.01                 | 2.18                | 30.5                 | unclass. <i>Flavobacteriaceae</i>   | <i>Flavobacteriaceae</i>            | <i>Flavobacteriales</i>             | <i>Flavobacteria</i>           | <i>Bacteroidetes</i>     | <i>Bacteria</i> |
| Otu1093                                                            | 3.01              | 0.99              | 8.09                  | 2.11                | 32.61                | unclass. <i>Proteobacteria</i>      | unclass. <i>Proteobacteria</i>      | unclass. <i>Proteobacteria</i>      | unclass. <i>Proteobacteria</i> | <i>Proteobacteria</i>    | <i>Bacteria</i> |
| Otu0826                                                            | 2.8               | 0.99              | 3.79                  | 2.11                | 34.71                | unclass. <i>Bacteroidetes</i>       | unclass. <i>Bacteroidetes</i>       | unclass. <i>Bacteroidetes</i>       | unclass. <i>Bacteroidetes</i>  | <i>Bacteroidetes</i>     | <i>Bacteria</i> |
| Otu0052                                                            | 2.7               | 0.99              | 11.14                 | 2.11                | 36.82                | unclass. <i>Betaproteobacteria</i>  | unclass. <i>Betaproteobacteria</i>  | unclass. <i>Betaproteobacteria</i>  | <i>Betaproteobacteria</i>      | <i>Proteobacteria</i>    | <i>Bacteria</i> |
| Otu0692                                                            | 2.7               | 0.91              | 7.31                  | 1.94                | 38.76                | unclass. <i>Bacteria</i>            | unclass. <i>Bacteria</i>            | unclass. <i>Bacteria</i>            | unclass. <i>Bacteria</i>       | unclass. <i>Bacteria</i> | <i>Bacteria</i> |
| Otu1023                                                            | 2.35              | 0.91              | 18.31                 | 1.93                | 40.69                | unclass. <i>Lentisphaeria</i>       | unclass. <i>Lentisphaeria</i>       | unclass. <i>Lentisphaeria</i>       | <i>Lentisphaeria</i>           | <i>Lentisphaerae</i>     | <i>Bacteria</i> |
| Otu0681                                                            | 2.85              | 0.89              | 3.15                  | 1.88                | 42.57                | unclass. <i>Bacteria</i>            | unclass. <i>Bacteria</i>            | unclass. <i>Bacteria</i>            | unclass. <i>Bacteria</i>       | unclass. <i>Bacteria</i> | <i>Bacteria</i> |
| Otu0469                                                            | 2.44              | 0.86              | 4.64                  | 1.82                | 44.39                | unclass. <i>Bacteria</i>            | unclass. <i>Bacteria</i>            | unclass. <i>Bacteria</i>            | unclass. <i>Bacteria</i>       | unclass. <i>Bacteria</i> | <i>Bacteria</i> |
| Otu0764                                                            | 2.18              | 0.84              | 14.08                 | 1.79                | 46.18                | unclass. <i>Proteobacteria</i>      | unclass. <i>Proteobacteria</i>      | unclass. <i>Proteobacteria</i>      | unclass. <i>Proteobacteria</i> | <i>Proteobacteria</i>    | <i>Bacteria</i> |

| OTU     | Av.A <sub>i</sub> | Av.S <sub>i</sub> | Av.S <sub>i</sub> /SD | Av.S <sub>i</sub> % | ∑Av.S <sub>i</sub> % | Genus                               | Family                              | Order                               | Class                          | Phylum                | Domain          |
|---------|-------------------|-------------------|-----------------------|---------------------|----------------------|-------------------------------------|-------------------------------------|-------------------------------------|--------------------------------|-----------------------|-----------------|
| Otu0983 | 2.52              | 0.83              | 5.83                  | 1.76                | 47.94                | unclass. <i>Flavobacteriales</i>    | unclass. <i>Flavobacteriales</i>    | <i>Flavobacteriales</i>             | <i>Flavobacteria</i>           | <i>Bacteroidetes</i>  | <i>Bacteria</i> |
| Otu0691 | 1.94              | 0.74              | 8.99                  | 1.57                | 49.51                | <i>Planctomyces</i>                 | <i>Planctomycetaceae</i>            | <i>Planctomycetales</i>             | <i>Planctomycetacia</i>        | <i>Planctomycetes</i> | <i>Bacteria</i> |
| Otu0490 | 1.94              | 0.74              | 13.46                 | 1.56                | 51.08                | unclass. <i>Burkholderiales</i>     | unclass. <i>Burkholderiales</i>     | <i>Burkholderiales</i>              | <i>Betaproteobacteria</i>      | <i>Proteobacteria</i> | <i>Bacteria</i> |
| Otu0467 | 2.24              | 0.71              | 2.13                  | 1.5                 | 52.58                | unclass. <i>Rhodospirillaceae</i>   | <i>Rhodospirillaceae</i>            | <i>Rhodospirillales</i>             | <i>Alphaproteobacteria</i>     | <i>Proteobacteria</i> | <i>Bacteria</i> |
| Otu0473 | 1.92              | 0.7               | 4.82                  | 1.48                | 54.06                | unclass. <i>Alphaproteobacteria</i> | unclass. <i>Alphaproteobacteria</i> | unclass. <i>Alphaproteobacteria</i> | <i>Alphaproteobacteria</i>     | <i>Proteobacteria</i> | <i>Bacteria</i> |
| Otu1097 | 1.77              | 0.65              | 5.05                  | 1.38                | 55.43                | unclass. <i>Proteobacteria</i>      | unclass. <i>Proteobacteria</i>      | unclass. <i>Proteobacteria</i>      | unclass. <i>Proteobacteria</i> | <i>Proteobacteria</i> | <i>Bacteria</i> |
| Otu0048 | 1.71              | 0.62              | 6.71                  | 1.31                | 56.74                | unclass. <i>Flavobacteriaceae</i>   | <i>Flavobacteriaceae</i>            | <i>Flavobacteriales</i>             | <i>Flavobacteria</i>           | <i>Bacteroidetes</i>  | <i>Bacteria</i> |
| Otu0541 | 1.6               | 0.61              | 9.33                  | 1.3                 | 58.05                | unclass. <i>Rhodobacteraceae</i>    | <i>Rhodobacteraceae</i>             | <i>Rhodobacterales</i>              | <i>Alphaproteobacteria</i>     | <i>Proteobacteria</i> | <i>Bacteria</i> |
| Otu0596 | 1.79              | 0.61              | 5.29                  | 1.29                | 59.34                | <i>Neptunomonas</i>                 | <i>Oceanospirillaceae</i>           | <i>Oceanospirillales</i>            | <i>Gammaproteobacteria</i>     | <i>Proteobacteria</i> | <i>Bacteria</i> |
| Otu0494 | 2.08              | 0.6               | 2.93                  | 1.27                | 60.61                | unclass. <i>Flavobacteriaceae</i>   | <i>Flavobacteriaceae</i>            | <i>Flavobacteriales</i>             | <i>Flavobacteria</i>           | <i>Bacteroidetes</i>  | <i>Bacteria</i> |
| Otu0776 | 1.76              | 0.55              | 4.22                  | 1.17                | 61.79                | unclass. <i>Proteobacteria</i>      | unclass. <i>Proteobacteria</i>      | unclass. <i>Proteobacteria</i>      | unclass. <i>Proteobacteria</i> | <i>Proteobacteria</i> | <i>Bacteria</i> |
| Otu0705 | 2.29              | 0.55              | 1.1                   | 1.16                | 62.95                | <i>Planctomyces</i>                 | <i>Planctomycetaceae</i>            | <i>Planctomycetales</i>             | <i>Planctomycetacia</i>        | <i>Planctomycetes</i> | <i>Bacteria</i> |
| Otu0281 | 1.52              | 0.54              | 4.7                   | 1.15                | 64.1                 | unclass. <i>Flavobacteriales</i>    | unclass. <i>Flavobacteriales</i>    | <i>Flavobacteriales</i>             | <i>Flavobacteria</i>           | <i>Bacteroidetes</i>  | <i>Bacteria</i> |
| Otu0509 | 1.39              | 0.51              | 6.06                  | 1.08                | 65.18                | unclass. <i>Gammaproteobacteria</i> | unclass. <i>Gammaproteobacteria</i> | unclass. <i>Gammaproteobacteria</i> | <i>Gammaproteobacteria</i>     | <i>Proteobacteria</i> | <i>Bacteria</i> |
| Otu0771 | 1.48              | 0.49              | 3.04                  | 1.03                | 66.21                | unclass. <i>Rhodobacteraceae</i>    | <i>Rhodobacteraceae</i>             | <i>Rhodobacterales</i>              | <i>Alphaproteobacteria</i>     | <i>Proteobacteria</i> | <i>Bacteria</i> |
| Otu0972 | 1.48              | 0.48              | 3.9                   | 1.02                | 67.22                | <i>Nisaea</i>                       | <i>Rhodospirillaceae</i>            | <i>Rhodospirillales</i>             | <i>Alphaproteobacteria</i>     | <i>Proteobacteria</i> | <i>Bacteria</i> |
| Otu1081 | 1.66              | 0.47              | 2.54                  | 0.99                | 68.22                | unclass. <i>Flavobacteriales</i>    | unclass. <i>Flavobacteriales</i>    | <i>Flavobacteriales</i>             | <i>Flavobacteria</i>           | <i>Bacteroidetes</i>  | <i>Bacteria</i> |
| Otu0694 | 1.41              | 0.46              | 4.44                  | 0.98                | 69.19                | unclass. <i>Alphaproteobacteria</i> | unclass. <i>Alphaproteobacteria</i> | unclass. <i>Alphaproteobacteria</i> | <i>Alphaproteobacteria</i>     | <i>Proteobacteria</i> | <i>Bacteria</i> |
| Otu1105 | 1.37              | 0.46              | 6.47                  | 0.97                | 70.16                | unclass. <i>Proteobacteria</i>      | unclass. <i>Proteobacteria</i>      | unclass. <i>Proteobacteria</i>      | unclass. <i>Proteobacteria</i> | <i>Proteobacteria</i> | <i>Bacteria</i> |
| Otu0695 | 1.29              | 0.43              | 5.6                   | 0.92                | 71.08                | unclass. <i>Proteobacteria</i>      | unclass. <i>Proteobacteria</i>      | unclass. <i>Proteobacteria</i>      | unclass. <i>Proteobacteria</i> | <i>Proteobacteria</i> | <i>Bacteria</i> |
| Otu0084 | 1.23              | 0.42              | 8.07                  | 0.9                 | 71.98                | unclass. <i>Gammaproteobacteria</i> | unclass. <i>Gammaproteobacteria</i> | unclass. <i>Gammaproteobacteria</i> | <i>Gammaproteobacteria</i>     | <i>Proteobacteria</i> | <i>Bacteria</i> |
| Otu0737 | 1.08              | 0.41              | 18.31                 | 0.86                | 72.85                | unclass. <i>Gammaproteobacteria</i> | unclass. <i>Gammaproteobacteria</i> | unclass. <i>Gammaproteobacteria</i> | <i>Gammaproteobacteria</i>     | <i>Proteobacteria</i> | <i>Bacteria</i> |
| Otu0696 | 1.48              | 0.4               | 1.13                  | 0.85                | 73.7                 | unclass. <i>Flavobacteriaceae</i>   | <i>Flavobacteriaceae</i>            | <i>Flavobacteriales</i>             | <i>Flavobacteria</i>           | <i>Bacteroidetes</i>  | <i>Bacteria</i> |
| Otu0485 | 1.26              | 0.35              | 1.16                  | 0.75                | 74.45                | unclass. <i>Alphaproteobacteria</i> | unclass. <i>Alphaproteobacteria</i> | unclass. <i>Alphaproteobacteria</i> | <i>Alphaproteobacteria</i>     | <i>Proteobacteria</i> | <i>Bacteria</i> |
| Otu0521 | 1.49              | 0.34              | 1.04                  | 0.73                | 75.17                | unclass. <i>Rhodobacteraceae</i>    | <i>Rhodobacteraceae</i>             | <i>Rhodobacterales</i>              | <i>Alphaproteobacteria</i>     | <i>Proteobacteria</i> | <i>Bacteria</i> |
| Otu1092 | 1.84              | 0.33              | 0.62                  | 0.69                | 75.87                | <i>Cycloclasticus</i>               | <i>Piscirickettsiaceae</i>          | <i>Thiotrichales</i>                | <i>Gammaproteobacteria</i>     | <i>Proteobacteria</i> | <i>Bacteria</i> |
| Otu1096 | 1.18              | 0.31              | 1.12                  | 0.66                | 76.53                | unclass. <i>Lentisphaeria</i>       | unclass. <i>Lentisphaeria</i>       | unclass. <i>Lentisphaeria</i>       | <i>Lentisphaeria</i>           | <i>Lentisphaerae</i>  | <i>Bacteria</i> |

| OTU     | Av.A <sub>i</sub> | Av.S <sub>i</sub> | Av.S <sub>i</sub> /SD | Av.S <sub>i</sub> % | ∑Av.S <sub>i</sub> % | Genus                               | Family                              | Order                               | Class                          | Phylum                   | Domain          |
|---------|-------------------|-------------------|-----------------------|---------------------|----------------------|-------------------------------------|-------------------------------------|-------------------------------------|--------------------------------|--------------------------|-----------------|
| Otu0960 | 1.23              | 0.3               | 1.1                   | 0.63                | 77.16                | unclass. <i>Bacteria</i>            | unclass. <i>Bacteria</i>            | unclass. <i>Bacteria</i>            | unclass. <i>Bacteria</i>       | unclass. <i>Bacteria</i> | <i>Bacteria</i> |
| Otu0261 | 1.17              | 0.29              | 1.14                  | 0.62                | 77.79                | <i>Winogradskyella</i>              | <i>Flavobacteriaceae</i>            | <i>Flavobacteriales</i>             | <i>Flavobacteria</i>           | <i>Bacteroidetes</i>     | <i>Bacteria</i> |
| Otu1113 | 1.11              | 0.29              | 1.11                  | 0.61                | 78.39                | unclass. <i>Gammaproteobacteria</i> | unclass. <i>Gammaproteobacteria</i> | unclass. <i>Gammaproteobacteria</i> | <i>Gammaproteobacteria</i>     | <i>Proteobacteria</i>    | <i>Bacteria</i> |
| Otu1115 | 1.17              | 0.29              | 1.11                  | 0.61                | 79                   | <i>Marinobacter</i>                 | <i>Alteromonadaceae</i>             | <i>Alteromonadales</i>              | <i>Gammaproteobacteria</i>     | <i>Proteobacteria</i>    | <i>Bacteria</i> |
| Otu0778 | 1.17              | 0.28              | 1.12                  | 0.6                 | 79.6                 | unclass. <i>Gammaproteobacteria</i> | unclass. <i>Gammaproteobacteria</i> | unclass. <i>Gammaproteobacteria</i> | <i>Gammaproteobacteria</i>     | <i>Proteobacteria</i>    | <i>Bacteria</i> |
| Otu1125 | 1.11              | 0.28              | 1.12                  | 0.6                 | 80.21                | <i>Planctomyces</i>                 | <i>Planctomycetaceae</i>            | <i>Planctomycetales</i>             | <i>Planctomycetacia</i>        | <i>Planctomycetes</i>    | <i>Bacteria</i> |
| Otu0621 | 1.15              | 0.28              | 1.11                  | 0.59                | 80.8                 | <i>Colwellia</i>                    | <i>Colwelliaceae</i>                | <i>Alteromonadales</i>              | <i>Gammaproteobacteria</i>     | <i>Proteobacteria</i>    | <i>Bacteria</i> |
| Otu1100 | 1.09              | 0.27              | 1.09                  | 0.58                | 81.38                | unclass. <i>Planctomycetaceae</i>   | <i>Planctomycetaceae</i>            | <i>Planctomycetales</i>             | <i>Planctomycetacia</i>        | <i>Planctomycetes</i>    | <i>Bacteria</i> |
| Otu0898 | 1.13              | 0.27              | 1.12                  | 0.57                | 81.95                | <i>Sphingopyxis</i>                 | <i>Sphingomonadaceae</i>            | <i>Sphingomonadales</i>             | <i>Alphaproteobacteria</i>     | <i>Proteobacteria</i>    | <i>Bacteria</i> |
| Otu0255 | 0.97              | 0.25              | 1.13                  | 0.54                | 82.49                | <i>Sphingopyxis</i>                 | <i>Sphingomonadaceae</i>            | <i>Sphingomonadales</i>             | <i>Alphaproteobacteria</i>     | <i>Proteobacteria</i>    | <i>Bacteria</i> |
| Otu1111 | 0.88              | 0.25              | 1.16                  | 0.53                | 83.02                | unclass. <i>Proteobacteria</i>      | unclass. <i>Proteobacteria</i>      | unclass. <i>Proteobacteria</i>      | unclass. <i>Proteobacteria</i> | <i>Proteobacteria</i>    | <i>Bacteria</i> |
| Otu0601 | 0.8               | 0.25              | 1.16                  | 0.52                | 83.54                | unclass. <i>Flammeovirgaceae</i>    | <i>Flammeovirgaceae</i>             | <i>Sphingobacteriales</i>           | <i>Sphingobacteria</i>         | <i>Bacteroidetes</i>     | <i>Bacteria</i> |
| Otu0817 | 0.8               | 0.25              | 1.16                  | 0.52                | 84.06                | unclass. <i>Bacteroidetes</i>       | unclass. <i>Bacteroidetes</i>       | unclass. <i>Bacteroidetes</i>       | unclass. <i>Bacteroidetes</i>  | <i>Bacteroidetes</i>     | <i>Bacteria</i> |
| Otu0170 | 0.8               | 0.24              | 1.16                  | 0.51                | 84.57                | unclass. <i>Bacteria</i>            | unclass. <i>Bacteria</i>            | unclass. <i>Bacteria</i>            | unclass. <i>Bacteria</i>       | unclass. <i>Bacteria</i> | <i>Bacteria</i> |
| Otu0137 | 0.88              | 0.24              | 1.16                  | 0.5                 | 85.08                | unclass. <i>Bacteroidetes</i>       | unclass. <i>Bacteroidetes</i>       | unclass. <i>Bacteroidetes</i>       | unclass. <i>Bacteroidetes</i>  | <i>Bacteroidetes</i>     | <i>Bacteria</i> |
| Otu0202 | 0.88              | 0.24              | 1.16                  | 0.5                 | 85.58                | unclass. <i>Alteromonadaceae</i>    | <i>Alteromonadaceae</i>             | <i>Alteromonadales</i>              | <i>Gammaproteobacteria</i>     | <i>Proteobacteria</i>    | <i>Bacteria</i> |
| Otu0959 | 0.88              | 0.24              | 1.16                  | 0.5                 | 86.08                | unclass. <i>Rhodobacteraceae</i>    | <i>Rhodobacteraceae</i>             | <i>Rhodobacterales</i>              | <i>Alphaproteobacteria</i>     | <i>Proteobacteria</i>    | <i>Bacteria</i> |
| Otu0710 | 1.24              | 0.23              | 0.62                  | 0.49                | 86.57                | unclass. <i>Gammaproteobacteria</i> | unclass. <i>Gammaproteobacteria</i> | unclass. <i>Gammaproteobacteria</i> | <i>Gammaproteobacteria</i>     | <i>Proteobacteria</i>    | <i>Bacteria</i> |
| Otu0186 | 0.85              | 0.18              | 0.62                  | 0.38                | 86.95                | unclass. <i>Planctomycetaceae</i>   | <i>Planctomycetaceae</i>            | <i>Planctomycetales</i>             | <i>Planctomycetacia</i>        | <i>Planctomycetes</i>    | <i>Bacteria</i> |
| Otu0645 | 0.97              | 0.16              | 0.62                  | 0.34                | 87.29                | <i>Arcobacter</i>                   | <i>Campylobacteraceae</i>           | <i>Campylobacterales</i>            | <i>Epsilonproteobacteria</i>   | <i>Proteobacteria</i>    | <i>Bacteria</i> |
| Otu0157 | 1.04              | 0.16              | 0.59                  | 0.34                | 87.64                | unclass. <i>Gammaproteobacteria</i> | unclass. <i>Gammaproteobacteria</i> | unclass. <i>Gammaproteobacteria</i> | <i>Gammaproteobacteria</i>     | <i>Proteobacteria</i>    | <i>Bacteria</i> |
| Otu0682 | 0.89              | 0.15              | 0.6                   | 0.33                | 87.96                | unclass. <i>Oceanospirillaceae</i>  | <i>Oceanospirillaceae</i>           | <i>Oceanospirillales</i>            | <i>Gammaproteobacteria</i>     | <i>Proteobacteria</i>    | <i>Bacteria</i> |
| Otu0846 | 0.83              | 0.14              | 0.61                  | 0.31                | 88.27                | unclass. <i>Nannocystaceae</i>      | <i>Nannocystaceae</i>               | <i>Myxococcales</i>                 | <i>Deltaproteobacteria</i>     | <i>Proteobacteria</i>    | <i>Bacteria</i> |
| Otu0611 | 0.83              | 0.14              | 0.61                  | 0.3                 | 88.57                | unclass. <i>Bacteroidetes</i>       | unclass. <i>Bacteroidetes</i>       | unclass. <i>Bacteroidetes</i>       | unclass. <i>Bacteroidetes</i>  | <i>Bacteroidetes</i>     | <i>Bacteria</i> |
| Otu0243 | 0.77              | 0.14              | 0.6                   | 0.3                 | 88.87                | unclass. <i>Gammaproteobacteria</i> | unclass. <i>Gammaproteobacteria</i> | unclass. <i>Gammaproteobacteria</i> | <i>Gammaproteobacteria</i>     | <i>Proteobacteria</i>    | <i>Bacteria</i> |
| Otu1118 | 0.77              | 0.14              | 0.61                  | 0.29                | 89.17                | unclass. <i>Oceanospirillales</i>   | unclass. <i>Oceanospirillales</i>   | <i>Oceanospirillales</i>            | <i>Gammaproteobacteria</i>     | <i>Proteobacteria</i>    | <i>Bacteria</i> |
| Otu0742 | 0.77              | 0.14              | 0.61                  | 0.29                | 89.46                | unclass. <i>Rhodobacteraceae</i>    | <i>Rhodobacteraceae</i>             | <i>Rhodobacterales</i>              | <i>Alphaproteobacteria</i>     | <i>Proteobacteria</i>    | <i>Bacteria</i> |

| OTU                                                      | Av.A <sub>i</sub> | Av.S <sub>i</sub> | Av.S <sub>i</sub> /SD | Av.S <sub>i</sub> % | ΣAv.S <sub>i</sub> % | Genus                               | Family                              | Order                               | Class                          | Phylum                   | Domain          |
|----------------------------------------------------------|-------------------|-------------------|-----------------------|---------------------|----------------------|-------------------------------------|-------------------------------------|-------------------------------------|--------------------------------|--------------------------|-----------------|
| Otu0502                                                  | 0.83              | 0.14              | 0.61                  | 0.29                | 89.74                | unclass. <i>Gammaproteobacteria</i> | unclass. <i>Gammaproteobacteria</i> | unclass. <i>Gammaproteobacteria</i> | <i>Gammaproteobacteria</i>     | <i>Proteobacteria</i>    | <i>Bacteria</i> |
| Otu1099                                                  | 0.77              | 0.13              | 0.61                  | 0.28                | 90.02                | unclass. <i>Lentisphaeria</i>       | unclass. <i>Lentisphaeria</i>       | unclass. <i>Lentisphaeria</i>       | <i>Lentisphaeria</i>           | <i>Lentisphaerae</i>     | <i>Bacteria</i> |
| Autumn 'no dilution' pH 7.67 (average similarity: 41.4%) |                   |                   |                       |                     |                      |                                     |                                     |                                     |                                |                          |                 |
| Otu0823                                                  | 4.66              | 1.37              | 3.1                   | 3.3                 | 3.3                  | unclass. <i>Legionellaceae</i>      | <i>Legionellaceae</i>               | <i>Legionellales</i>                | <i>Gammaproteobacteria</i>     | <i>Proteobacteria</i>    | <i>Bacteria</i> |
| Otu0068                                                  | 4.27              | 1.27              | 7.8                   | 3.06                | 6.36                 | <i>Pelagibacter</i>                 | SAR11-clade                         | <i>Rickettsiales</i>                | <i>Alphaproteobacteria</i>     | <i>Proteobacteria</i>    | <i>Bacteria</i> |
| Otu0691                                                  | 4.06              | 1.16              | 2.77                  | 2.8                 | 9.16                 | <i>Planctomyces</i>                 | <i>Planctomycetaceae</i>            | <i>Planctomycetales</i>             | <i>Planctomycetacia</i>        | <i>Planctomycetes</i>    | <i>Bacteria</i> |
| Otu1091                                                  | 2.89              | 0.97              | 24.66                 | 2.35                | 11.51                | unclass. <i>Flavobacteriaceae</i>   | <i>Flavobacteriaceae</i>            | <i>Flavobacteriales</i>             | <i>Flavobacteria</i>           | <i>Bacteroidetes</i>     | <i>Bacteria</i> |
| Otu1094                                                  | 3.09              | 0.96              | 7.44                  | 2.31                | 13.82                | unclass. <i>Bacteroidetes</i>       | unclass. <i>Bacteroidetes</i>       | unclass. <i>Bacteroidetes</i>       | unclass. <i>Bacteroidetes</i>  | <i>Bacteroidetes</i>     | <i>Bacteria</i> |
| Otu1023                                                  | 2.9               | 0.93              | 41                    | 2.26                | 16.08                | unclass. <i>Lentisphaeria</i>       | unclass. <i>Lentisphaeria</i>       | unclass. <i>Lentisphaeria</i>       | <i>Lentisphaeria</i>           | <i>Lentisphaerae</i>     | <i>Bacteria</i> |
| Otu0005                                                  | 3.46              | 0.91              | 2.18                  | 2.19                | 18.27                | <i>Pelagibacter</i>                 | SAR11-clade                         | <i>Rickettsiales</i>                | <i>Alphaproteobacteria</i>     | <i>Proteobacteria</i>    | <i>Bacteria</i> |
| Otu0705                                                  | 2.94              | 0.85              | 3.37                  | 2.05                | 20.32                | <i>Planctomyces</i>                 | <i>Planctomycetaceae</i>            | <i>Planctomycetales</i>             | <i>Planctomycetacia</i>        | <i>Planctomycetes</i>    | <i>Bacteria</i> |
| Otu0053                                                  | 2.81              | 0.83              | 2.84                  | 2.01                | 22.33                | unclass. <i>Rhodobacteraceae</i>    | <i>Rhodobacteraceae</i>             | <i>Rhodobacterales</i>              | <i>Alphaproteobacteria</i>     | <i>Proteobacteria</i>    | <i>Bacteria</i> |
| Otu0735                                                  | 2.76              | 0.83              | 3.78                  | 2                   | 24.33                | unclass. <i>Gammaproteobacteria</i> | unclass. <i>Gammaproteobacteria</i> | unclass. <i>Gammaproteobacteria</i> | <i>Gammaproteobacteria</i>     | <i>Proteobacteria</i>    | <i>Bacteria</i> |
| Otu1093                                                  | 2.75              | 0.8               | 5.96                  | 1.94                | 26.27                | unclass. <i>Proteobacteria</i>      | unclass. <i>Proteobacteria</i>      | unclass. <i>Proteobacteria</i>      | unclass. <i>Proteobacteria</i> | <i>Proteobacteria</i>    | <i>Bacteria</i> |
| Otu0765                                                  | 2.45              | 0.78              | 75.16                 | 1.89                | 28.16                | <i>Pelagicoccus</i>                 | <i>Puniceococcaceae</i>             | <i>Puniceococcales</i>              | <i>Opitutae</i>                | <i>Verrucomicrobia</i>   | <i>Bacteria</i> |
| Otu0490                                                  | 2.22              | 0.72              | 7.42                  | 1.74                | 29.9                 | unclass. <i>Burkholderiales</i>     | unclass. <i>Burkholderiales</i>     | <i>Burkholderiales</i>              | <i>Betaproteobacteria</i>      | <i>Proteobacteria</i>    | <i>Bacteria</i> |
| Otu0469                                                  | 2.49              | 0.72              | 3.63                  | 1.73                | 31.63                | unclass. <i>Bacteria</i>            | unclass. <i>Bacteria</i>            | unclass. <i>Bacteria</i>            | unclass. <i>Bacteria</i>       | unclass. <i>Bacteria</i> | <i>Bacteria</i> |
| Otu0261                                                  | 2.47              | 0.7               | 4.52                  | 1.68                | 33.32                | <i>Winogradskyella</i>              | <i>Flavobacteriaceae</i>            | <i>Flavobacteriales</i>             | <i>Flavobacteria</i>           | <i>Bacteroidetes</i>     | <i>Bacteria</i> |
| Otu0826                                                  | 2.19              | 0.67              | 4.48                  | 1.62                | 34.93                | unclass. <i>Bacteroidetes</i>       | unclass. <i>Bacteroidetes</i>       | unclass. <i>Bacteroidetes</i>       | unclass. <i>Bacteroidetes</i>  | <i>Bacteroidetes</i>     | <i>Bacteria</i> |
| Otu0714                                                  | 2.12              | 0.67              | 6.54                  | 1.61                | 36.55                | unclass. <i>Alphaproteobacteria</i> | unclass. <i>Alphaproteobacteria</i> | unclass. <i>Alphaproteobacteria</i> | <i>Alphaproteobacteria</i>     | <i>Proteobacteria</i>    | <i>Bacteria</i> |
| Otu0692                                                  | 2.39              | 0.67              | 3.81                  | 1.61                | 38.16                | unclass. <i>Bacteria</i>            | unclass. <i>Bacteria</i>            | unclass. <i>Bacteria</i>            | unclass. <i>Bacteria</i>       | unclass. <i>Bacteria</i> | <i>Bacteria</i> |
| Otu0052                                                  | 2.32              | 0.66              | 4.18                  | 1.59                | 39.75                | unclass. <i>Betaproteobacteria</i>  | unclass. <i>Betaproteobacteria</i>  | unclass. <i>Betaproteobacteria</i>  | <i>Betaproteobacteria</i>      | <i>Proteobacteria</i>    | <i>Bacteria</i> |
| Otu0830                                                  | 2.18              | 0.64              | 4.77                  | 1.56                | 41.3                 | unclass. <i>Gammaproteobacteria</i> | unclass. <i>Gammaproteobacteria</i> | unclass. <i>Gammaproteobacteria</i> | <i>Gammaproteobacteria</i>     | <i>Proteobacteria</i>    | <i>Bacteria</i> |
| Otu1090                                                  | 2.33              | 0.64              | 3.67                  | 1.54                | 42.84                | unclass. <i>Bacteria</i>            | unclass. <i>Bacteria</i>            | unclass. <i>Bacteria</i>            | unclass. <i>Bacteria</i>       | unclass. <i>Bacteria</i> | <i>Bacteria</i> |
| Otu0281                                                  | 2.15              | 0.61              | 2.57                  | 1.47                | 44.32                | unclass. <i>Flavobacteriales</i>    | unclass. <i>Flavobacteriales</i>    | <i>Flavobacteriales</i>             | <i>Flavobacteria</i>           | <i>Bacteroidetes</i>     | <i>Bacteria</i> |
| Otu0710                                                  | 1.89              | 0.56              | 5.96                  | 1.34                | 45.66                | unclass. <i>Gammaproteobacteria</i> | unclass. <i>Gammaproteobacteria</i> | unclass. <i>Gammaproteobacteria</i> | <i>Gammaproteobacteria</i>     | <i>Proteobacteria</i>    | <i>Bacteria</i> |
| Otu0681                                                  | 1.59              | 0.51              | 13.68                 | 1.22                | 46.89                | unclass. <i>Bacteria</i>            | unclass. <i>Bacteria</i>            | unclass. <i>Bacteria</i>            | unclass. <i>Bacteria</i>       | unclass. <i>Bacteria</i> | <i>Bacteria</i> |

| OTU     | Av.A <sub>i</sub> | Av.S <sub>i</sub> | Av.S <sub>i</sub> /SD | Av.S <sub>i</sub> % | ∑Av.S <sub>i</sub> % | Genus                               | Family                              | Order                               | Class                         | Phylum                   | Domain          |
|---------|-------------------|-------------------|-----------------------|---------------------|----------------------|-------------------------------------|-------------------------------------|-------------------------------------|-------------------------------|--------------------------|-----------------|
| Otu0359 | 1.68              | 0.5               | 3.34                  | 1.2                 | 48.09                | unclass. <i>Gammaproteobacteria</i> | unclass. <i>Gammaproteobacteria</i> | unclass. <i>Gammaproteobacteria</i> | <i>Gammaproteobacteria</i>    | <i>Proteobacteria</i>    | <i>Bacteria</i> |
| Otu1062 | 1.68              | 0.48              | 3.65                  | 1.16                | 49.25                | unclass. <i>Gammaproteobacteria</i> | unclass. <i>Gammaproteobacteria</i> | unclass. <i>Gammaproteobacteria</i> | <i>Gammaproteobacteria</i>    | <i>Proteobacteria</i>    | <i>Bacteria</i> |
| Otu1096 | 1.52              | 0.47              | 4.04                  | 1.14                | 50.39                | unclass. <i>Lentisphaeria</i>       | unclass. <i>Lentisphaeria</i>       | unclass. <i>Lentisphaeria</i>       | <i>Lentisphaeria</i>          | <i>Lentisphaerae</i>     | <i>Bacteria</i> |
| Otu0645 | 1.52              | 0.47              | 4.15                  | 1.14                | 51.53                | <i>Arcobacter</i>                   | <i>Campylobacteraceae</i>           | <i>Campylobacterales</i>            | <i>Epsilonproteobacteria</i>  | <i>Proteobacteria</i>    | <i>Bacteria</i> |
| Otu0737 | 1.58              | 0.47              | 4.15                  | 1.14                | 52.67                | unclass. <i>Gammaproteobacteria</i> | unclass. <i>Gammaproteobacteria</i> | unclass. <i>Gammaproteobacteria</i> | <i>Gammaproteobacteria</i>    | <i>Proteobacteria</i>    | <i>Bacteria</i> |
| Otu0495 | 1.71              | 0.45              | 4.92                  | 1.08                | 53.75                | unclass. <i>Flavobacteriales</i>    | unclass. <i>Flavobacteriales</i>    | <i>Flavobacteriales</i>             | <i>Flavobacteria</i>          | <i>Bacteroidetes</i>     | <i>Bacteria</i> |
| Otu0521 | 1.43              | 0.41              | 4.29                  | 0.98                | 54.73                | unclass. <i>Rhodobacteraceae</i>    | <i>Rhodobacteraceae</i>             | <i>Rhodobacterales</i>              | <i>Alphaproteobacteria</i>    | <i>Proteobacteria</i>    | <i>Bacteria</i> |
| Otu0084 | 1.52              | 0.4               | 4.5                   | 0.98                | 55.71                | unclass. <i>Gammaproteobacteria</i> | unclass. <i>Gammaproteobacteria</i> | unclass. <i>Gammaproteobacteria</i> | <i>Gammaproteobacteria</i>    | <i>Proteobacteria</i>    | <i>Bacteria</i> |
| Otu0272 | 1.31              | 0.39              | 5.33                  | 0.95                | 56.66                | unclass. <i>Flavobacteriaceae</i>   | <i>Flavobacteriaceae</i>            | <i>Flavobacteriales</i>             | <i>Flavobacteria</i>          | <i>Bacteroidetes</i>     | <i>Bacteria</i> |
| Otu0758 | 1.37              | 0.39              | 5.8                   | 0.95                | 57.61                | unclass. <i>Bacteria</i>            | unclass. <i>Bacteria</i>            | unclass. <i>Bacteria</i>            | unclass. <i>Bacteria</i>      | unclass. <i>Bacteria</i> | <i>Bacteria</i> |
| Otu0682 | 1.35              | 0.38              | 4.69                  | 0.91                | 58.52                | unclass. <i>Oceanospirillaceae</i>  | <i>Oceanospirillaceae</i>           | <i>Oceanospirillales</i>            | <i>Gammaproteobacteria</i>    | <i>Proteobacteria</i>    | <i>Bacteria</i> |
| Otu1107 | 1.35              | 0.38              | 4.86                  | 0.91                | 59.43                | unclass. <i>Planctomycetaceae</i>   | <i>Planctomycetaceae</i>            | <i>Planctomycetales</i>             | <i>Planctomycetacia</i>       | <i>Planctomycetes</i>    | <i>Bacteria</i> |
| Otu0137 | 1.23              | 0.37              | 8.19                  | 0.88                | 60.31                | unclass. <i>Bacteroidetes</i>       | unclass. <i>Bacteroidetes</i>       | unclass. <i>Bacteroidetes</i>       | unclass. <i>Bacteroidetes</i> | <i>Bacteroidetes</i>     | <i>Bacteria</i> |
| Otu1081 | 1.68              | 0.35              | 1.1                   | 0.85                | 61.17                | unclass. <i>Flavobacteriales</i>    | unclass. <i>Flavobacteriales</i>    | <i>Flavobacteriales</i>             | <i>Flavobacteria</i>          | <i>Bacteroidetes</i>     | <i>Bacteria</i> |
| Otu1092 | 1.89              | 0.31              | 0.62                  | 0.75                | 61.91                | <i>Cycloclasticus</i>               | <i>Piscirickettsiaceae</i>          | <i>Thiotrichales</i>                | <i>Gammaproteobacteria</i>    | <i>Proteobacteria</i>    | <i>Bacteria</i> |
| Otu1113 | 1.13              | 0.3               | 1.16                  | 0.72                | 62.63                | unclass. <i>Gammaproteobacteria</i> | unclass. <i>Gammaproteobacteria</i> | unclass. <i>Gammaproteobacteria</i> | <i>Gammaproteobacteria</i>    | <i>Proteobacteria</i>    | <i>Bacteria</i> |
| Otu0694 | 1.19              | 0.3               | 1.16                  | 0.72                | 63.35                | unclass. <i>Alphaproteobacteria</i> | unclass. <i>Alphaproteobacteria</i> | unclass. <i>Alphaproteobacteria</i> | <i>Alphaproteobacteria</i>    | <i>Proteobacteria</i>    | <i>Bacteria</i> |
| Otu1125 | 1.53              | 0.28              | 1.04                  | 0.68                | 64.03                | <i>Planctomyces</i>                 | <i>Planctomycetaceae</i>            | <i>Planctomycetales</i>             | <i>Planctomycetacia</i>       | <i>Planctomycetes</i>    | <i>Bacteria</i> |
| Otu0255 | 1.23              | 0.26              | 1.1                   | 0.64                | 64.67                | <i>Sphingopyxis</i>                 | <i>Sphingomonadaceae</i>            | <i>Sphingomonadales</i>             | <i>Alphaproteobacteria</i>    | <i>Proteobacteria</i>    | <i>Bacteria</i> |
| Otu0895 | 1.18              | 0.26              | 1.1                   | 0.64                | 65.31                | unclass. <i>Actinobacteria</i>      | unclass. <i>Actinobacteria</i>      | unclass. <i>Actinobacteria</i>      | <i>Actinobacteria</i>         | <i>Actinobacteria</i>    | <i>Bacteria</i> |
| Otu0001 | 1.18              | 0.26              | 1.1                   | 0.64                | 65.95                | unclass. <i>Flavobacteriaceae</i>   | <i>Flavobacteriaceae</i>            | <i>Flavobacteriales</i>             | <i>Flavobacteria</i>          | <i>Bacteroidetes</i>     | <i>Bacteria</i> |
| Otu0473 | 1.11              | 0.26              | 1.12                  | 0.62                | 66.56                | unclass. <i>Alphaproteobacteria</i> | unclass. <i>Alphaproteobacteria</i> | unclass. <i>Alphaproteobacteria</i> | <i>Alphaproteobacteria</i>    | <i>Proteobacteria</i>    | <i>Bacteria</i> |
| Otu1193 | 1.05              | 0.26              | 1.12                  | 0.62                | 67.18                | unclass. <i>Saprospiraceae</i>      | <i>Saprospiraceae</i>               | <i>Sphingobacteriales</i>           | <i>Sphingobacteria</i>        | <i>Bacteroidetes</i>     | <i>Bacteria</i> |
| Otu1099 | 1.29              | 0.25              | 1.12                  | 0.61                | 67.8                 | unclass. <i>Lentisphaeria</i>       | unclass. <i>Lentisphaeria</i>       | unclass. <i>Lentisphaeria</i>       | <i>Lentisphaeria</i>          | <i>Lentisphaerae</i>     | <i>Bacteria</i> |
| Otu0156 | 1.29              | 0.25              | 1.12                  | 0.61                | 68.41                | unclass. <i>Gammaproteobacteria</i> | unclass. <i>Gammaproteobacteria</i> | unclass. <i>Gammaproteobacteria</i> | <i>Gammaproteobacteria</i>    | <i>Proteobacteria</i>    | <i>Bacteria</i> |
| Otu0186 | 1.17              | 0.25              | 1.12                  | 0.61                | 69.03                | unclass. <i>Planctomycetaceae</i>   | <i>Planctomycetaceae</i>            | <i>Planctomycetales</i>             | <i>Planctomycetacia</i>       | <i>Planctomycetes</i>    | <i>Bacteria</i> |
| Otu0696 | 1.11              | 0.25              | 1.12                  | 0.61                | 69.64                | unclass. <i>Flavobacteriaceae</i>   | <i>Flavobacteriaceae</i>            | <i>Flavobacteriales</i>             | <i>Flavobacteria</i>          | <i>Bacteroidetes</i>     | <i>Bacteria</i> |

| OTU     | Av.A <sub>i</sub> | Av.S <sub>i</sub> | Av.S <sub>i</sub> /SD | Av.S <sub>i</sub> % | ∑Av.S <sub>i</sub> % | Genus                               | Family                              | Order                               | Class                         | Phylum                   | Domain          |
|---------|-------------------|-------------------|-----------------------|---------------------|----------------------|-------------------------------------|-------------------------------------|-------------------------------------|-------------------------------|--------------------------|-----------------|
| Otu0194 | 1.29              | 0.25              | 1                     | 0.61                | 70.25                | unclass. <i>Bacteroidetes</i>       | unclass. <i>Bacteroidetes</i>       | unclass. <i>Bacteroidetes</i>       | unclass. <i>Bacteroidetes</i> | <i>Bacteroidetes</i>     | <i>Bacteria</i> |
| Otu0517 | 1.05              | 0.25              | 1.12                  | 0.61                | 70.86                | unclass. <i>Bacteroidetes</i>       | unclass. <i>Bacteroidetes</i>       | unclass. <i>Bacteroidetes</i>       | unclass. <i>Bacteroidetes</i> | <i>Bacteroidetes</i>     | <i>Bacteria</i> |
| Otu1147 | 1.11              | 0.25              | 1.12                  | 0.61                | 71.47                | unclass. <i>Bacteria</i>            | unclass. <i>Bacteria</i>            | unclass. <i>Bacteria</i>            | unclass. <i>Bacteria</i>      | unclass. <i>Bacteria</i> | <i>Bacteria</i> |
| Otu0849 | 1.21              | 0.25              | 1.12                  | 0.61                | 72.08                | unclass. <i>Alphaproteobacteria</i> | unclass. <i>Alphaproteobacteria</i> | unclass. <i>Alphaproteobacteria</i> | <i>Alphaproteobacteria</i>    | <i>Proteobacteria</i>    | <i>Bacteria</i> |
| Otu0596 | 1.17              | 0.25              | 1.12                  | 0.61                | 72.69                | <i>Neptunomonas</i>                 | <i>Oceanospirillaceae</i>           | <i>Oceanospirillales</i>            | <i>Gammaproteobacteria</i>    | <i>Proteobacteria</i>    | <i>Bacteria</i> |
| Otu0503 | 1.15              | 0.24              | 1.08                  | 0.57                | 73.26                | unclass. <i>Bacteroidetes</i>       | unclass. <i>Bacteroidetes</i>       | unclass. <i>Bacteroidetes</i>       | unclass. <i>Bacteroidetes</i> | <i>Bacteroidetes</i>     | <i>Bacteria</i> |
| Otu0450 | 1.09              | 0.23              | 1.09                  | 0.57                | 73.83                | <i>Sphingobium</i>                  | <i>Sphingomonadaceae</i>            | <i>Sphingomonadales</i>             | <i>Alphaproteobacteria</i>    | <i>Proteobacteria</i>    | <i>Bacteria</i> |
| Otu0003 | 1.21              | 0.23              | 1.13                  | 0.55                | 74.37                | unclass. <i>Rhodobacteraceae</i>    | <i>Rhodobacteraceae</i>             | <i>Rhodobacterales</i>              | <i>Alphaproteobacteria</i>    | <i>Proteobacteria</i>    | <i>Bacteria</i> |
| Otu0157 | 1.46              | 0.23              | 1.14                  | 0.55                | 74.92                | unclass. <i>Gammaproteobacteria</i> | unclass. <i>Gammaproteobacteria</i> | unclass. <i>Gammaproteobacteria</i> | <i>Gammaproteobacteria</i>    | <i>Proteobacteria</i>    | <i>Bacteria</i> |
| Otu0509 | 1.08              | 0.23              | 1.14                  | 0.55                | 75.47                | unclass. <i>Gammaproteobacteria</i> | unclass. <i>Gammaproteobacteria</i> | unclass. <i>Gammaproteobacteria</i> | <i>Gammaproteobacteria</i>    | <i>Proteobacteria</i>    | <i>Bacteria</i> |
| Otu0971 | 0.97              | 0.23              | 1.13                  | 0.54                | 76.01                | unclass. <i>Gammaproteobacteria</i> | unclass. <i>Gammaproteobacteria</i> | unclass. <i>Gammaproteobacteria</i> | <i>Gammaproteobacteria</i>    | <i>Proteobacteria</i>    | <i>Bacteria</i> |
| Otu0134 | 1.17              | 0.23              | 1.13                  | 0.54                | 76.56                | unclass. <i>Gammaproteobacteria</i> | unclass. <i>Gammaproteobacteria</i> | unclass. <i>Gammaproteobacteria</i> | <i>Gammaproteobacteria</i>    | <i>Proteobacteria</i>    | <i>Bacteria</i> |
| Otu0541 | 1.03              | 0.23              | 1.13                  | 0.54                | 77.1                 | unclass. <i>Rhodobacteraceae</i>    | <i>Rhodobacteraceae</i>             | <i>Rhodobacterales</i>              | <i>Alphaproteobacteria</i>    | <i>Proteobacteria</i>    | <i>Bacteria</i> |
| Otu1333 | 1.03              | 0.23              | 1.13                  | 0.54                | 77.64                | unclass. <i>Legionellaceae</i>      | <i>Legionellaceae</i>               | <i>Legionellales</i>                | <i>Gammaproteobacteria</i>    | <i>Proteobacteria</i>    | <i>Bacteria</i> |
| Otu1209 | 1.03              | 0.22              | 1.13                  | 0.54                | 78.19                | unclass. <i>Bacteria</i>            | unclass. <i>Bacteria</i>            | unclass. <i>Bacteria</i>            | unclass. <i>Bacteria</i>      | unclass. <i>Bacteria</i> | <i>Bacteria</i> |
| Otu0844 | 1.08              | 0.22              | 1.14                  | 0.54                | 78.73                | unclass. <i>Flavobacteriaceae</i>   | <i>Flavobacteriaceae</i>            | <i>Flavobacteriales</i>             | <i>Flavobacteria</i>          | <i>Bacteroidetes</i>     | <i>Bacteria</i> |
| Otu0761 | 0.88              | 0.21              | 1.16                  | 0.51                | 79.24                | unclass. <i>Verrucomicrobiaceae</i> | <i>Verrucomicrobiaceae</i>          | <i>Verrucomicrobiales</i>           | <i>Verrucomicrobiae</i>       | <i>Verrucomicrobia</i>   | <i>Bacteria</i> |
| Otu1430 | 0.88              | 0.21              | 1.16                  | 0.51                | 79.74                | unclass. <i>Bacteria</i>            | unclass. <i>Bacteria</i>            | unclass. <i>Bacteria</i>            | unclass. <i>Bacteria</i>      | unclass. <i>Bacteria</i> | <i>Bacteria</i> |
| Otu0707 | 0.8               | 0.21              | 1.16                  | 0.51                | 80.25                | <i>Haliea</i>                       | <i>Alteromonadaceae</i>             | <i>Alteromonadales</i>              | <i>Gammaproteobacteria</i>    | <i>Proteobacteria</i>    | <i>Bacteria</i> |
| Otu1270 | 0.88              | 0.21              | 1.16                  | 0.51                | 80.76                | unclass. <i>Flavobacteriaceae</i>   | <i>Flavobacteriaceae</i>            | <i>Flavobacteriales</i>             | <i>Flavobacteria</i>          | <i>Bacteroidetes</i>     | <i>Bacteria</i> |
| Otu0394 | 0.8               | 0.21              | 1.16                  | 0.51                | 81.27                | unclass. <i>Bacteria</i>            | unclass. <i>Bacteria</i>            | unclass. <i>Bacteria</i>            | unclass. <i>Bacteria</i>      | unclass. <i>Bacteria</i> | <i>Bacteria</i> |
| Otu0502 | 0.95              | 0.21              | 1.16                  | 0.51                | 81.77                | unclass. <i>Gammaproteobacteria</i> | unclass. <i>Gammaproteobacteria</i> | unclass. <i>Gammaproteobacteria</i> | <i>Gammaproteobacteria</i>    | <i>Proteobacteria</i>    | <i>Bacteria</i> |
| Otu0973 | 0.8               | 0.21              | 1.16                  | 0.51                | 82.28                | unclass. <i>Flavobacteriaceae</i>   | <i>Flavobacteriaceae</i>            | <i>Flavobacteriales</i>             | <i>Flavobacteria</i>          | <i>Bacteroidetes</i>     | <i>Bacteria</i> |
| Otu1198 | 0.88              | 0.21              | 1.16                  | 0.51                | 82.78                | unclass. <i>Gammaproteobacteria</i> | unclass. <i>Gammaproteobacteria</i> | unclass. <i>Gammaproteobacteria</i> | <i>Gammaproteobacteria</i>    | <i>Proteobacteria</i>    | <i>Bacteria</i> |
| Otu1386 | 1.21              | 0.17              | 0.61                  | 0.41                | 83.19                | unclass. <i>Bacteria</i>            | unclass. <i>Bacteria</i>            | unclass. <i>Bacteria</i>            | unclass. <i>Bacteria</i>      | unclass. <i>Bacteria</i> | <i>Bacteria</i> |
| Otu1350 | 1.18              | 0.15              | 0.56                  | 0.36                | 83.56                | unclass. <i>Bacteria</i>            | unclass. <i>Bacteria</i>            | unclass. <i>Bacteria</i>            | unclass. <i>Bacteria</i>      | unclass. <i>Bacteria</i> | <i>Bacteria</i> |
| Otu0048 | 0.91              | 0.15              | 0.62                  | 0.36                | 83.91                | unclass. <i>Flavobacteriaceae</i>   | <i>Flavobacteriaceae</i>            | <i>Flavobacteriales</i>             | <i>Flavobacteria</i>          | <i>Bacteroidetes</i>     | <i>Bacteria</i> |



| OTU                                                                    | Av.A <sub>i</sub> | Av.S <sub>i</sub> | Av.S <sub>i</sub> /SD | Av.S <sub>i</sub> % | ΣAv.S <sub>i</sub> % | Genus                               | Family                              | Order                               | Class                          | Phylum                   | Domain          |
|------------------------------------------------------------------------|-------------------|-------------------|-----------------------|---------------------|----------------------|-------------------------------------|-------------------------------------|-------------------------------------|--------------------------------|--------------------------|-----------------|
| Otu0139                                                                | 1.04              | 0.13              | 0.59                  | 0.32                | 84.23                | unclass. <i>Gammaproteobacteria</i> | unclass. <i>Gammaproteobacteria</i> | unclass. <i>Gammaproteobacteria</i> | <i>Gammaproteobacteria</i>     | <i>Proteobacteria</i>    | <i>Bacteria</i> |
| Otu1102                                                                | 1.21              | 0.13              | 0.59                  | 0.32                | 84.55                | unclass. <i>Proteobacteria</i>      | unclass. <i>Proteobacteria</i>      | unclass. <i>Proteobacteria</i>      | unclass. <i>Proteobacteria</i> | <i>Proteobacteria</i>    | <i>Bacteria</i> |
| Otu1173                                                                | 0.89              | 0.13              | 0.59                  | 0.32                | 84.87                | <i>Opitutus</i>                     | <i>Opitutaceae</i>                  | <i>Opitales</i>                     | <i>Opituae</i>                 | <i>Verrucomicrobia</i>   | <i>Bacteria</i> |
| Otu0898                                                                | 1.04              | 0.13              | 0.59                  | 0.31                | 85.19                | <i>Sphingopyxis</i>                 | <i>Sphingomonadaceae</i>            | <i>Sphingomonadales</i>             | <i>Alphaproteobacteria</i>     | <i>Proteobacteria</i>    | <i>Bacteria</i> |
| Otu0986                                                                | 0.77              | 0.12              | 0.61                  | 0.29                | 85.48                | unclass. <i>Planctomycetaceae</i>   | <i>Planctomycetaceae</i>            | <i>Planctomycetales</i>             | <i>Planctomycetacia</i>        | <i>Planctomycetes</i>    | <i>Bacteria</i> |
| Otu1234                                                                | 0.83              | 0.12              | 0.61                  | 0.29                | 85.77                | unclass. <i>Oceanospirillaceae</i>  | <i>Oceanospirillaceae</i>           | <i>Oceanospirillales</i>            | <i>Gammaproteobacteria</i>     | <i>Proteobacteria</i>    | <i>Bacteria</i> |
| Otu0075                                                                | 0.77              | 0.12              | 0.61                  | 0.29                | 86.05                | unclass. <i>Alphaproteobacteria</i> | unclass. <i>Alphaproteobacteria</i> | unclass. <i>Alphaproteobacteria</i> | <i>Alphaproteobacteria</i>     | <i>Proteobacteria</i>    | <i>Bacteria</i> |
| Otu0464                                                                | 0.83              | 0.12              | 0.61                  | 0.29                | 86.34                | unclass. <i>Bacteroidetes</i>       | unclass. <i>Bacteroidetes</i>       | unclass. <i>Bacteroidetes</i>       | unclass. <i>Bacteroidetes</i>  | <i>Bacteroidetes</i>     | <i>Bacteria</i> |
| Otu0485                                                                | 0.83              | 0.12              | 0.61                  | 0.29                | 86.63                | unclass. <i>Alphaproteobacteria</i> | unclass. <i>Alphaproteobacteria</i> | unclass. <i>Alphaproteobacteria</i> | <i>Alphaproteobacteria</i>     | <i>Proteobacteria</i>    | <i>Bacteria</i> |
| Otu0467                                                                | 1.01              | 0.12              | 0.61                  | 0.29                | 86.91                | unclass. <i>Rhodospirillaceae</i>   | <i>Rhodospirillaceae</i>            | <i>Rhodospirillales</i>             | <i>Alphaproteobacteria</i>     | <i>Proteobacteria</i>    | <i>Bacteria</i> |
| Otu0142                                                                | 0.6               | 0.11              | 0.62                  | 0.26                | 87.17                | unclass. <i>Gammaproteobacteria</i> | unclass. <i>Gammaproteobacteria</i> | unclass. <i>Gammaproteobacteria</i> | <i>Gammaproteobacteria</i>     | <i>Proteobacteria</i>    | <i>Bacteria</i> |
| Otu0734                                                                | 0.68              | 0.11              | 0.62                  | 0.26                | 87.43                | unclass. <i>Bacteria</i>            | unclass. <i>Bacteria</i>            | unclass. <i>Bacteria</i>            | unclass. <i>Bacteria</i>       | unclass. <i>Bacteria</i> | <i>Bacteria</i> |
| Otu1219                                                                | 0.6               | 0.11              | 0.62                  | 0.26                | 87.68                | unclass. <i>Bacteria</i>            | unclass. <i>Bacteria</i>            | unclass. <i>Bacteria</i>            | unclass. <i>Bacteria</i>       | unclass. <i>Bacteria</i> | <i>Bacteria</i> |
| Otu0395                                                                | 0.68              | 0.11              | 0.62                  | 0.26                | 87.94                | unclass. <i>Sphingobacteriales</i>  | unclass. <i>Sphingobacteriales</i>  | <i>Sphingobacteriales</i>           | <i>Sphingobacteria</i>         | <i>Bacteroidetes</i>     | <i>Bacteria</i> |
| Otu1109                                                                | 0.6               | 0.11              | 0.62                  | 0.26                | 88.19                | unclass. <i>Saprospiraceae</i>      | <i>Saprospiraceae</i>               | <i>Sphingobacteriales</i>           | <i>Sphingobacteria</i>         | <i>Bacteroidetes</i>     | <i>Bacteria</i> |
| Otu1135                                                                | 0.68              | 0.11              | 0.62                  | 0.26                | 88.45                | unclass. <i>Sphingobacteriales</i>  | unclass. <i>Sphingobacteriales</i>  | <i>Sphingobacteriales</i>           | <i>Sphingobacteria</i>         | <i>Bacteroidetes</i>     | <i>Bacteria</i> |
| Otu0601                                                                | 0.6               | 0.11              | 0.62                  | 0.25                | 88.71                | unclass. <i>Flammeovirgaceae</i>    | <i>Flammeovirgaceae</i>             | <i>Sphingobacteriales</i>           | <i>Sphingobacteria</i>         | <i>Bacteroidetes</i>     | <i>Bacteria</i> |
| Otu0846                                                                | 0.68              | 0.11              | 0.62                  | 0.25                | 88.96                | unclass. <i>Nannocystaceae</i>      | <i>Nannocystaceae</i>               | <i>Myxococcales</i>                 | <i>Deltaproteobacteria</i>     | <i>Proteobacteria</i>    | <i>Bacteria</i> |
| Otu0998                                                                | 0.75              | 0.11              | 0.62                  | 0.25                | 89.22                | unclass. <i>Gammaproteobacteria</i> | unclass. <i>Gammaproteobacteria</i> | unclass. <i>Gammaproteobacteria</i> | <i>Gammaproteobacteria</i>     | <i>Proteobacteria</i>    | <i>Bacteria</i> |
| Otu0408                                                                | 0.68              | 0.11              | 0.62                  | 0.25                | 89.47                | unclass. <i>Flavobacteriaceae</i>   | <i>Flavobacteriaceae</i>            | <i>Flavobacteriales</i>             | <i>Flavobacteria</i>           | <i>Bacteroidetes</i>     | <i>Bacteria</i> |
| Otu0767                                                                | 0.6               | 0.11              | 0.62                  | 0.25                | 89.72                | unclass. <i>Bacteria</i>            | unclass. <i>Bacteria</i>            | unclass. <i>Bacteria</i>            | unclass. <i>Bacteria</i>       | unclass. <i>Bacteria</i> | <i>Bacteria</i> |
| Otu1195                                                                | 0.68              | 0.1               | 0.62                  | 0.25                | 89.98                | unclass. <i>Bacteria</i>            | unclass. <i>Bacteria</i>            | unclass. <i>Bacteria</i>            | unclass. <i>Bacteria</i>       | unclass. <i>Bacteria</i> | <i>Bacteria</i> |
| Otu1256                                                                | 0.68              | 0.1               | 0.62                  | 0.25                | 90.23                | unclass. <i>Sphingobacteriales</i>  | unclass. <i>Sphingobacteriales</i>  | <i>Sphingobacteriales</i>           | <i>Sphingobacteria</i>         | <i>Bacteroidetes</i>     | <i>Bacteria</i> |
| Autumn 'serial dilution' pH <i>in situ</i> (average similarity: 66.8%) |                   |                   |                       |                     |                      |                                     |                                     |                                     |                                |                          |                 |
| Otu0132                                                                | 16.35             | 26.63             | 2.66                  | 39.89               | 39.89                | unclass. <i>Alteromonadales</i>     | unclass. <i>Alteromonadales</i>     | <i>Alteromonadales</i>              | <i>Gammaproteobacteria</i>     | <i>Proteobacteria</i>    | <i>Bacteria</i> |
| Otu0106                                                                | 9.15              | 11.09             | 1.94                  | 16.61               | 56.5                 | <i>Marinomonas</i>                  | <i>Oceanospirillaceae</i>           | <i>Oceanospirillales</i>            | <i>Gammaproteobacteria</i>     | <i>Proteobacteria</i>    | <i>Bacteria</i> |
| Otu0107                                                                | 7.12              | 10.47             | 4.17                  | 15.68               | 72.18                | unclass. <i>Rhodobacteraceae</i>    | <i>Rhodobacteraceae</i>             | <i>Rhodobacterales</i>              | <i>Alphaproteobacteria</i>     | <i>Proteobacteria</i>    | <i>Bacteria</i> |

| OTU                                                                | Av.A <sub>i</sub> | Av.S <sub>i</sub> | Av.S <sub>i</sub> /SD | Av.S <sub>i</sub> % | ∑Av.S <sub>i</sub> % | Genus                               | Family                              | Order                               | Class                        | Phylum                | Domain          |
|--------------------------------------------------------------------|-------------------|-------------------|-----------------------|---------------------|----------------------|-------------------------------------|-------------------------------------|-------------------------------------|------------------------------|-----------------------|-----------------|
| Otu0471                                                            | 2.82              | 4.56              | 3.38                  | 6.83                | 79.01                | <i>Oceaniserpentilla</i>            | <i>Oceanospirillaceae</i>           | <i>Oceanospirillales</i>            | <i>Gammaproteobacteria</i>   | <i>Proteobacteria</i> | <i>Bacteria</i> |
| Otu0001                                                            | 3.02              | 3.66              | 3.38                  | 5.49                | 84.5                 | unclass. <i>Flavobacteriaceae</i>   | <i>Flavobacteriaceae</i>            | <i>Flavobacteriales</i>             | <i>Flavobacteria</i>         | <i>Bacteroidetes</i>  | <i>Bacteria</i> |
| Otu0123                                                            | 2.23              | 2.67              | 1.03                  | 4                   | 88.5                 | unclass. <i>Gammaproteobacteria</i> | unclass. <i>Gammaproteobacteria</i> | unclass. <i>Gammaproteobacteria</i> | <i>Gammaproteobacteria</i>   | <i>Proteobacteria</i> | <i>Bacteria</i> |
| Otu0036                                                            | 2.12              | 2.64              | 3.79                  | 3.96                | 92.46                | <i>Glaciecola</i>                   | <i>Alteromonadaceae</i>             | <i>Alteromonadales</i>              | <i>Gammaproteobacteria</i>   | <i>Proteobacteria</i> | <i>Bacteria</i> |
| Autumn 'serial dilution' pH 7.67 (average similarity: 61.5%)       |                   |                   |                       |                     |                      |                                     |                                     |                                     |                              |                       |                 |
| Otu0132                                                            | 13.24             | 18.33             | 3.29                  | 29.8                | 29.8                 | unclass. <i>Alteromonadales</i>     | unclass. <i>Alteromonadales</i>     | <i>Alteromonadales</i>              | <i>Gammaproteobacteria</i>   | <i>Proteobacteria</i> | <i>Bacteria</i> |
| Otu0106                                                            | 11.14             | 11.89             | 1.81                  | 19.33               | 49.13                | <i>Marinomonas</i>                  | <i>Oceanospirillaceae</i>           | <i>Oceanospirillales</i>            | <i>Gammaproteobacteria</i>   | <i>Proteobacteria</i> | <i>Bacteria</i> |
| Otu0471                                                            | 6.73              | 7.09              | 2.06                  | 11.52               | 60.65                | <i>Oceaniserpentilla</i>            | <i>Oceanospirillaceae</i>           | <i>Oceanospirillales</i>            | <i>Gammaproteobacteria</i>   | <i>Proteobacteria</i> | <i>Bacteria</i> |
| Otu0107                                                            | 5.35              | 6.96              | 4.15                  | 11.32               | 71.97                | unclass. <i>Rhodobacteraceae</i>    | <i>Rhodobacteraceae</i>             | <i>Rhodobacterales</i>              | <i>Alphaproteobacteria</i>   | <i>Proteobacteria</i> | <i>Bacteria</i> |
| Otu0551                                                            | 4.01              | 4.71              | 2.9                   | 7.65                | 79.63                | <i>Arcobacter</i>                   | <i>Campylobacteraceae</i>           | <i>Campylobacterales</i>            | <i>Epsilonproteobacteria</i> | <i>Proteobacteria</i> | <i>Bacteria</i> |
| Otu0036                                                            | 3.66              | 4.03              | 2.37                  | 6.56                | 86.19                | <i>Glaciecola</i>                   | <i>Alteromonadaceae</i>             | <i>Alteromonadales</i>              | <i>Gammaproteobacteria</i>   | <i>Proteobacteria</i> | <i>Bacteria</i> |
| Otu0621                                                            | 1.78              | 1.59              | 0.98                  | 2.58                | 88.77                | <i>Colwellia</i>                    | <i>Colwelliaceae</i>                | <i>Alteromonadales</i>              | <i>Gammaproteobacteria</i>   | <i>Proteobacteria</i> | <i>Bacteria</i> |
| Otu0123                                                            | 1.74              | 1.47              | 0.99                  | 2.39                | 91.16                | unclass. <i>Gammaproteobacteria</i> | unclass. <i>Gammaproteobacteria</i> | unclass. <i>Gammaproteobacteria</i> | <i>Gammaproteobacteria</i>   | <i>Proteobacteria</i> | <i>Bacteria</i> |
| Winter 'no dilution' pH <i>in situ</i> (average similarity: 46.3%) |                   |                   |                       |                     |                      |                                     |                                     |                                     |                              |                       |                 |
| Otu0010                                                            | 7.33              | 3.29              | 11.97                 | 7.1                 | 7.1                  | unclass. <i>Flavobacteriaceae</i>   | <i>Flavobacteriaceae</i>            | <i>Flavobacteriales</i>             | <i>Flavobacteria</i>         | <i>Bacteroidetes</i>  | <i>Bacteria</i> |
| Otu1815                                                            | 5.57              | 2.24              | 3.87                  | 4.83                | 11.93                | unclass. <i>Flavobacteriales</i>    | unclass. <i>Flavobacteriales</i>    | <i>Flavobacteriales</i>             | <i>Flavobacteria</i>         | <i>Bacteroidetes</i>  | <i>Bacteria</i> |
| Otu0041                                                            | 4.85              | 1.98              | 13.44                 | 4.28                | 16.22                | <i>Sulfitobacter</i>                | <i>Rhodobacteraceae</i>             | <i>Rhodobacterales</i>              | <i>Alphaproteobacteria</i>   | <i>Proteobacteria</i> | <i>Bacteria</i> |
| Otu0134                                                            | 4.57              | 1.9               | 5.21                  | 4.1                 | 20.31                | unclass. <i>Gammaproteobacteria</i> | unclass. <i>Gammaproteobacteria</i> | unclass. <i>Gammaproteobacteria</i> | <i>Gammaproteobacteria</i>   | <i>Proteobacteria</i> | <i>Bacteria</i> |
| Otu0236                                                            | 4.16              | 1.83              | 8.98                  | 3.94                | 24.26                | unclass. <i>Gammaproteobacteria</i> | unclass. <i>Gammaproteobacteria</i> | unclass. <i>Gammaproteobacteria</i> | <i>Gammaproteobacteria</i>   | <i>Proteobacteria</i> | <i>Bacteria</i> |
| Otu1283                                                            | 4.37              | 1.75              | 3.81                  | 3.77                | 28.03                | <i>Croceibacter</i>                 | <i>Flavobacteriaceae</i>            | <i>Flavobacteriales</i>             | <i>Flavobacteria</i>         | <i>Bacteroidetes</i>  | <i>Bacteria</i> |
| Otu0055                                                            | 3.73              | 1.51              | 5.73                  | 3.26                | 31.29                | <i>Colwellia</i>                    | <i>Colwelliaceae</i>                | <i>Alteromonadales</i>              | <i>Gammaproteobacteria</i>   | <i>Proteobacteria</i> | <i>Bacteria</i> |
| Otu0068                                                            | 3.4               | 1.38              | 5.01                  | 2.98                | 34.28                | <i>Pelagibacter</i>                 | SAR11-clade                         | <i>Rickettsiales</i>                | <i>Alphaproteobacteria</i>   | <i>Proteobacteria</i> | <i>Bacteria</i> |
| Otu0160                                                            | 3.51              | 1.31              | 4.03                  | 2.83                | 37.11                | <i>Colwellia</i>                    | <i>Colwelliaceae</i>                | <i>Alteromonadales</i>              | <i>Gammaproteobacteria</i>   | <i>Proteobacteria</i> | <i>Bacteria</i> |
| Otu0139                                                            | 4.22              | 1.29              | 1.83                  | 2.78                | 39.89                | unclass. <i>Gammaproteobacteria</i> | unclass. <i>Gammaproteobacteria</i> | unclass. <i>Gammaproteobacteria</i> | <i>Gammaproteobacteria</i>   | <i>Proteobacteria</i> | <i>Bacteria</i> |
| Otu1694                                                            | 2.94              | 1.13              | 2                     | 2.45                | 42.34                | unclass. <i>Flavobacteriales</i>    | unclass. <i>Flavobacteriales</i>    | <i>Flavobacteriales</i>             | <i>Flavobacteria</i>         | <i>Bacteroidetes</i>  | <i>Bacteria</i> |
| Otu0047                                                            | 2.51              | 0.98              | 5.58                  | 2.12                | 44.46                | unclass. <i>Rhodobacteraceae</i>    | <i>Rhodobacteraceae</i>             | <i>Rhodobacterales</i>              | <i>Alphaproteobacteria</i>   | <i>Proteobacteria</i> | <i>Bacteria</i> |
| Otu1822                                                            | 2.52              | 0.95              | 3.88                  | 2.06                | 46.52                | unclass. <i>Flavobacteriales</i>    | unclass. <i>Flavobacteriales</i>    | <i>Flavobacteriales</i>             | <i>Flavobacteria</i>         | <i>Bacteroidetes</i>  | <i>Bacteria</i> |

| OTU     | Av.A <sub>i</sub> | Av.S <sub>i</sub> | Av.S <sub>i</sub> /SD | Av.S <sub>i</sub> % | ΣAv.S <sub>i</sub> % | Genus                               | Family                              | Order                               | Class                         | Phylum                   | Domain          |
|---------|-------------------|-------------------|-----------------------|---------------------|----------------------|-------------------------------------|-------------------------------------|-------------------------------------|-------------------------------|--------------------------|-----------------|
| Otu0005 | 2.51              | 0.95              | 7.01                  | 2.06                | 48.58                | <i>Pelagibacter</i>                 | SAR11-clade                         | <i>Rickettsiales</i>                | <i>Alphaproteobacteria</i>    | <i>Proteobacteria</i>    | <i>Bacteria</i> |
| Otu0469 | 1.92              | 0.81              | 6.53                  | 1.74                | 50.32                | unclass. <i>Bacteria</i>            | unclass. <i>Bacteria</i>            | unclass. <i>Bacteria</i>            | unclass. <i>Bacteria</i>      | unclass. <i>Bacteria</i> | <i>Bacteria</i> |
| Otu0164 | 1.94              | 0.78              | 2.95                  | 1.68                | 52.01                | <i>Croceibacter</i>                 | <i>Flavobacteriaceae</i>            | <i>Flavobacteriales</i>             | <i>Flavobacteria</i>          | <i>Bacteroidetes</i>     | <i>Bacteria</i> |
| Otu0032 | 1.79              | 0.73              | 3.37                  | 1.57                | 53.58                | unclass. <i>Gammaproteobacteria</i> | unclass. <i>Gammaproteobacteria</i> | unclass. <i>Gammaproteobacteria</i> | <i>Gammaproteobacteria</i>    | <i>Proteobacteria</i>    | <i>Bacteria</i> |
| Otu0157 | 1.75              | 0.72              | 10.86                 | 1.56                | 55.14                | unclass. <i>Gammaproteobacteria</i> | unclass. <i>Gammaproteobacteria</i> | unclass. <i>Gammaproteobacteria</i> | <i>Gammaproteobacteria</i>    | <i>Proteobacteria</i>    | <i>Bacteria</i> |
| Otu0001 | 1.91              | 0.72              | 2.72                  | 1.55                | 56.69                | unclass. <i>Flavobacteriaceae</i>   | <i>Flavobacteriaceae</i>            | <i>Flavobacteriales</i>             | <i>Flavobacteria</i>          | <i>Bacteroidetes</i>     | <i>Bacteria</i> |
| Otu0163 | 1.87              | 0.71              | 2.88                  | 1.54                | 58.23                | unclass. <i>Gammaproteobacteria</i> | unclass. <i>Gammaproteobacteria</i> | unclass. <i>Gammaproteobacteria</i> | <i>Gammaproteobacteria</i>    | <i>Proteobacteria</i>    | <i>Bacteria</i> |
| Otu1720 | 1.86              | 0.7               | 2.92                  | 1.5                 | 59.73                | unclass. <i>Bacteria</i>            | unclass. <i>Bacteria</i>            | unclass. <i>Bacteria</i>            | unclass. <i>Bacteria</i>      | unclass. <i>Bacteria</i> | <i>Bacteria</i> |
| Otu0076 | 1.63              | 0.66              | 3.63                  | 1.42                | 61.15                | unclass. <i>Flammeovirgaceae</i>    | <i>Flammeovirgaceae</i>             | <i>Sphingobacteriales</i>           | <i>Sphingobacteria</i>        | <i>Bacteroidetes</i>     | <i>Bacteria</i> |
| Otu0035 | 1.78              | 0.64              | 2.42                  | 1.39                | 62.54                | <i>Colwellia</i>                    | <i>Colwelliaceae</i>                | <i>Alteromonadales</i>              | <i>Gammaproteobacteria</i>    | <i>Proteobacteria</i>    | <i>Bacteria</i> |
| Otu1146 | 1.58              | 0.64              | 4.45                  | 1.39                | 63.92                | <i>Nitrosospira</i>                 | <i>Nitrosomonadaceae</i>            | <i>Nitrosomonadales</i>             | <i>Betaproteobacteria</i>     | <i>Proteobacteria</i>    | <i>Bacteria</i> |
| Otu0124 | 1.51              | 0.61              | 4.81                  | 1.33                | 65.25                | <i>Loktanela</i>                    | <i>Rhodobacteraceae</i>             | <i>Rhodobacterales</i>              | <i>Alphaproteobacteria</i>    | <i>Proteobacteria</i>    | <i>Bacteria</i> |
| Otu0056 | 1.39              | 0.6               | 6.56                  | 1.29                | 66.54                | unclass. <i>Gammaproteobacteria</i> | unclass. <i>Gammaproteobacteria</i> | unclass. <i>Gammaproteobacteria</i> | <i>Gammaproteobacteria</i>    | <i>Proteobacteria</i>    | <i>Bacteria</i> |
| Otu0270 | 1.55              | 0.6               | 3.18                  | 1.29                | 67.83                | unclass. <i>Bacteroidetes</i>       | unclass. <i>Bacteroidetes</i>       | unclass. <i>Bacteroidetes</i>       | unclass. <i>Bacteroidetes</i> | <i>Bacteroidetes</i>     | <i>Bacteria</i> |
| Otu0012 | 1.49              | 0.54              | 5.94                  | 1.16                | 68.99                | unclass. <i>Comamonadaceae</i>      | <i>Comamonadaceae</i>               | <i>Burkholderiales</i>              | <i>Betaproteobacteria</i>     | <i>Proteobacteria</i>    | <i>Bacteria</i> |
| Otu0113 | 1.91              | 0.54              | 1.06                  | 1.16                | 70.14                | <i>Colwellia</i>                    | <i>Colwelliaceae</i>                | <i>Alteromonadales</i>              | <i>Gammaproteobacteria</i>    | <i>Proteobacteria</i>    | <i>Bacteria</i> |
| Otu0044 | 1.35              | 0.51              | 4.74                  | 1.11                | 71.25                | unclass. <i>Gammaproteobacteria</i> | unclass. <i>Gammaproteobacteria</i> | unclass. <i>Gammaproteobacteria</i> | <i>Gammaproteobacteria</i>    | <i>Proteobacteria</i>    | <i>Bacteria</i> |
| Otu0177 | 1.17              | 0.5               | 7.33                  | 1.08                | 72.33                | <i>Haliae</i>                       | <i>Alteromonadaceae</i>             | <i>Alteromonadales</i>              | <i>Gammaproteobacteria</i>    | <i>Proteobacteria</i>    | <i>Bacteria</i> |
| Otu0262 | 1.17              | 0.5               | 8.16                  | 1.08                | 73.41                | unclass. <i>Gammaproteobacteria</i> | unclass. <i>Gammaproteobacteria</i> | unclass. <i>Gammaproteobacteria</i> | <i>Gammaproteobacteria</i>    | <i>Proteobacteria</i>    | <i>Bacteria</i> |
| Otu0291 | 1.23              | 0.5               | 8.52                  | 1.08                | 74.49                | unclass. <i>Flavobacteriaceae</i>   | <i>Flavobacteriaceae</i>            | <i>Flavobacteriales</i>             | <i>Flavobacteria</i>          | <i>Bacteroidetes</i>     | <i>Bacteria</i> |
| Otu0572 | 2.33              | 0.45              | 0.94                  | 0.96                | 75.45                | <i>Croceibacter</i>                 | <i>Flavobacteriaceae</i>            | <i>Flavobacteriales</i>             | <i>Flavobacteria</i>          | <i>Bacteroidetes</i>     | <i>Bacteria</i> |
| Otu0122 | 1.58              | 0.45              | 1.01                  | 0.96                | 76.41                | <i>Glaciacola</i>                   | <i>Alteromonadaceae</i>             | <i>Alteromonadales</i>              | <i>Gammaproteobacteria</i>    | <i>Proteobacteria</i>    | <i>Bacteria</i> |
| Otu0261 | 1.51              | 0.42              | 1.15                  | 0.91                | 77.32                | <i>Winogradskyella</i>              | <i>Flavobacteriaceae</i>            | <i>Flavobacteriales</i>             | <i>Flavobacteria</i>          | <i>Bacteroidetes</i>     | <i>Bacteria</i> |
| Otu0143 | 1.28              | 0.37              | 1.09                  | 0.79                | 78.11                | unclass. <i>Gammaproteobacteria</i> | unclass. <i>Gammaproteobacteria</i> | unclass. <i>Gammaproteobacteria</i> | <i>Gammaproteobacteria</i>    | <i>Proteobacteria</i>    | <i>Bacteria</i> |
| Otu0022 | 1.34              | 0.35              | 0.98                  | 0.76                | 78.87                | unclass. <i>Betaproteobacteria</i>  | unclass. <i>Betaproteobacteria</i>  | unclass. <i>Betaproteobacteria</i>  | <i>Betaproteobacteria</i>     | <i>Proteobacteria</i>    | <i>Bacteria</i> |
| Otu0002 | 1.11              | 0.35              | 1.12                  | 0.75                | 79.62                | unclass. <i>Flavobacteriaceae</i>   | <i>Flavobacteriaceae</i>            | <i>Flavobacteriales</i>             | <i>Flavobacteria</i>          | <i>Bacteroidetes</i>     | <i>Bacteria</i> |
| Otu0052 | 1.38              | 0.33              | 0.62                  | 0.71                | 80.33                | unclass. <i>Betaproteobacteria</i>  | unclass. <i>Betaproteobacteria</i>  | unclass. <i>Betaproteobacteria</i>  | <i>Betaproteobacteria</i>     | <i>Proteobacteria</i>    | <i>Bacteria</i> |

| OTU                                                      | Av.A <sub>i</sub> | Av.S <sub>i</sub> | Av.S <sub>i</sub> /SD | Av.S <sub>i</sub> % | ΣAv.S <sub>i</sub> % | Genus                               | Family                              | Order                               | Class                         | Phylum                   | Domain          |
|----------------------------------------------------------|-------------------|-------------------|-----------------------|---------------------|----------------------|-------------------------------------|-------------------------------------|-------------------------------------|-------------------------------|--------------------------|-----------------|
| Otu0140                                                  | 1.09              | 0.32              | 1.08                  | 0.7                 | 81.03                | <i>Oleispira</i>                    | <i>Oceanospirillaceae</i>           | <i>Oceanospirillales</i>            | <i>Gammaproteobacteria</i>    | <i>Proteobacteria</i>    | <i>Bacteria</i> |
| Otu0268                                                  | 1.15              | 0.32              | 1.08                  | 0.7                 | 81.73                | unclass. <i>Flavobacteriaceae</i>   | <i>Flavobacteriaceae</i>            | <i>Flavobacteriales</i>             | <i>Flavobacteria</i>          | <i>Bacteroidetes</i>     | <i>Bacteria</i> |
| Otu0366                                                  | 1.09              | 0.32              | 1.09                  | 0.68                | 82.41                | unclass. <i>Saprospiraceae</i>      | <i>Saprospiraceae</i>               | <i>Sphingobacteriales</i>           | <i>Sphingobacteria</i>        | <i>Bacteroidetes</i>     | <i>Bacteria</i> |
| Otu0009                                                  | 0.97              | 0.31              | 1.13                  | 0.67                | 83.08                | unclass. <i>Rhodobacteraceae</i>    | <i>Rhodobacteraceae</i>             | <i>Rhodobacterales</i>              | <i>Alphaproteobacteria</i>    | <i>Proteobacteria</i>    | <i>Bacteria</i> |
| Otu0133                                                  | 0.97              | 0.3               | 1.13                  | 0.65                | 83.73                | <i>Colwellia</i>                    | <i>Colwelliaceae</i>                | <i>Alteromonadales</i>              | <i>Gammaproteobacteria</i>    | <i>Proteobacteria</i>    | <i>Bacteria</i> |
| Otu1723                                                  | 1.08              | 0.3               | 1.13                  | 0.65                | 84.39                | unclass. <i>Bacteroidetes</i>       | unclass. <i>Bacteroidetes</i>       | unclass. <i>Bacteroidetes</i>       | unclass. <i>Bacteroidetes</i> | <i>Bacteroidetes</i>     | <i>Bacteria</i> |
| Otu0203                                                  | 0.88              | 0.29              | 1.16                  | 0.62                | 85.01                | <i>Pelagibacter</i>                 | SAR11-clade                         | <i>Rickettsiales</i>                | <i>Alphaproteobacteria</i>    | <i>Proteobacteria</i>    | <i>Bacteria</i> |
| Otu1816                                                  | 0.8               | 0.29              | 1.16                  | 0.62                | 85.63                | unclass. <i>Flavobacteriales</i>    | unclass. <i>Flavobacteriales</i>    | <i>Flavobacteriales</i>             | <i>Flavobacteria</i>          | <i>Bacteroidetes</i>     | <i>Bacteria</i> |
| Otu0170                                                  | 0.88              | 0.29              | 1.16                  | 0.62                | 86.26                | unclass. <i>Bacteria</i>            | unclass. <i>Bacteria</i>            | unclass. <i>Bacteria</i>            | unclass. <i>Bacteria</i>      | unclass. <i>Bacteria</i> | <i>Bacteria</i> |
| Otu0348                                                  | 0.8               | 0.29              | 1.16                  | 0.62                | 86.88                | unclass. <i>Flavobacteriaceae</i>   | <i>Flavobacteriaceae</i>            | <i>Flavobacteriales</i>             | <i>Flavobacteria</i>          | <i>Bacteroidetes</i>     | <i>Bacteria</i> |
| Otu0046                                                  | 0.95              | 0.28              | 1.16                  | 0.61                | 87.49                | unclass. <i>Flavobacteriaceae</i>   | <i>Flavobacteriaceae</i>            | <i>Flavobacteriales</i>             | <i>Flavobacteria</i>          | <i>Bacteroidetes</i>     | <i>Bacteria</i> |
| Otu0369                                                  | 0.8               | 0.28              | 1.16                  | 0.61                | 88.1                 | unclass. <i>Deltaproteobacteria</i> | unclass. <i>Deltaproteobacteria</i> | unclass. <i>Deltaproteobacteria</i> | <i>Deltaproteobacteria</i>    | <i>Proteobacteria</i>    | <i>Bacteria</i> |
| Otu1837                                                  | 0.88              | 0.28              | 1.16                  | 0.61                | 88.71                | unclass. <i>Flavobacteriales</i>    | unclass. <i>Flavobacteriales</i>    | <i>Flavobacteriales</i>             | <i>Flavobacteria</i>          | <i>Bacteroidetes</i>     | <i>Bacteria</i> |
| Otu0013                                                  | 1.09              | 0.25              | 0.62                  | 0.55                | 89.26                | unclass. <i>Flavobacteriaceae</i>   | <i>Flavobacteriaceae</i>            | <i>Flavobacteriales</i>             | <i>Flavobacteria</i>          | <i>Bacteroidetes</i>     | <i>Bacteria</i> |
| Otu0062                                                  | 0.95              | 0.18              | 0.59                  | 0.39                | 89.65                | <i>Halieta</i>                      | <i>Alteromonadaceae</i>             | <i>Alteromonadales</i>              | <i>Gammaproteobacteria</i>    | <i>Proteobacteria</i>    | <i>Bacteria</i> |
| Otu0118                                                  | 1.04              | 0.18              | 0.59                  | 0.38                | 90.03                | <i>Colwellia</i>                    | <i>Colwelliaceae</i>                | <i>Alteromonadales</i>              | <i>Gammaproteobacteria</i>    | <i>Proteobacteria</i>    | <i>Bacteria</i> |
| Winter 'no dilution' pH 7.67 (average similarity: 40.6%) |                   |                   |                       |                     |                      |                                     |                                     |                                     |                               |                          |                 |
| Otu0010                                                  | 6.83              | 2.94              | 13.81                 | 7.25                | 7.25                 | unclass. <i>Flavobacteriaceae</i>   | <i>Flavobacteriaceae</i>            | <i>Flavobacteriales</i>             | <i>Flavobacteria</i>          | <i>Bacteroidetes</i>     | <i>Bacteria</i> |
| Otu0055                                                  | 6.14              | 2.42              | 8.96                  | 5.95                | 13.2                 | <i>Colwellia</i>                    | <i>Colwelliaceae</i>                | <i>Alteromonadales</i>              | <i>Gammaproteobacteria</i>    | <i>Proteobacteria</i>    | <i>Bacteria</i> |
| Otu0139                                                  | 5.78              | 1.96              | 3.12                  | 4.83                | 18.03                | unclass. <i>Gammaproteobacteria</i> | unclass. <i>Gammaproteobacteria</i> | unclass. <i>Gammaproteobacteria</i> | <i>Gammaproteobacteria</i>    | <i>Proteobacteria</i>    | <i>Bacteria</i> |
| Otu1692                                                  | 3.71              | 1.49              | 10.87                 | 3.68                | 21.71                | unclass. <i>Rhodobacteraceae</i>    | <i>Rhodobacteraceae</i>             | <i>Rhodobacterales</i>              | <i>Alphaproteobacteria</i>    | <i>Proteobacteria</i>    | <i>Bacteria</i> |
| Otu0160                                                  | 3.81              | 1.49              | 6.83                  | 3.67                | 25.39                | <i>Colwellia</i>                    | <i>Colwelliaceae</i>                | <i>Alteromonadales</i>              | <i>Gammaproteobacteria</i>    | <i>Proteobacteria</i>    | <i>Bacteria</i> |
| Otu1815                                                  | 4.03              | 1.47              | 3.24                  | 3.61                | 29                   | unclass. <i>Flavobacteriales</i>    | unclass. <i>Flavobacteriales</i>    | <i>Flavobacteriales</i>             | <i>Flavobacteria</i>          | <i>Bacteroidetes</i>     | <i>Bacteria</i> |
| Otu0134                                                  | 3.58              | 1.35              | 3.89                  | 3.32                | 32.32                | unclass. <i>Gammaproteobacteria</i> | unclass. <i>Gammaproteobacteria</i> | unclass. <i>Gammaproteobacteria</i> | <i>Gammaproteobacteria</i>    | <i>Proteobacteria</i>    | <i>Bacteria</i> |
| Otu0366                                                  | 3.02              | 1.3               | 14.75                 | 3.21                | 35.54                | unclass. <i>Saprospiraceae</i>      | <i>Saprospiraceae</i>               | <i>Sphingobacteriales</i>           | <i>Sphingobacteria</i>        | <i>Bacteroidetes</i>     | <i>Bacteria</i> |
| Otu0469                                                  | 3.36              | 1.27              | 5.6                   | 3.12                | 38.66                | unclass. <i>Bacteria</i>            | unclass. <i>Bacteria</i>            | unclass. <i>Bacteria</i>            | unclass. <i>Bacteria</i>      | unclass. <i>Bacteria</i> | <i>Bacteria</i> |
| Otu0068                                                  | 3.42              | 1.27              | 4.56                  | 3.12                | 41.78                | <i>Pelagibacter</i>                 | SAR11-clade                         | <i>Rickettsiales</i>                | <i>Alphaproteobacteria</i>    | <i>Proteobacteria</i>    | <i>Bacteria</i> |

| OTU     | Av.A <sub>i</sub> | Av.S <sub>i</sub> | Av.S <sub>i</sub> /SD | Av.S <sub>i</sub> % | ΣAv.S <sub>i</sub> % | Genus                               | Family                              | Order                               | Class                         | Phylum                   | Domain          |
|---------|-------------------|-------------------|-----------------------|---------------------|----------------------|-------------------------------------|-------------------------------------|-------------------------------------|-------------------------------|--------------------------|-----------------|
| Otu0047 | 3.28              | 1.24              | 3.82                  | 3.06                | 44.84                | unclass. <i>Rhodobacteraceae</i>    | <i>Rhodobacteraceae</i>             | <i>Rhodobacterales</i>              | <i>Alphaproteobacteria</i>    | <i>Proteobacteria</i>    | <i>Bacteria</i> |
| Otu0005 | 2.76              | 1.03              | 7.32                  | 2.55                | 47.39                | <i>Pelagibacter</i>                 | SAR11-clade                         | <i>Rickettsiales</i>                | <i>Alphaproteobacteria</i>    | <i>Proteobacteria</i>    | <i>Bacteria</i> |
| Otu0066 | 2.32              | 0.85              | 3.69                  | 2.09                | 49.48                | <i>Granulosicoccus</i>              | <i>Granulosicoccaceae</i>           | <i>Chromatiales</i>                 | <i>Gammaproteobacteria</i>    | <i>Proteobacteria</i>    | <i>Bacteria</i> |
| Otu0035 | 2.06              | 0.75              | 4.19                  | 1.84                | 51.32                | <i>Colwellia</i>                    | <i>Colwelliaceae</i>                | <i>Alteromonadales</i>              | <i>Gammaproteobacteria</i>    | <i>Proteobacteria</i>    | <i>Bacteria</i> |
| Otu1283 | 2.5               | 0.7               | 2.44                  | 1.73                | 53.06                | <i>Croceibacter</i>                 | <i>Flavobacteriaceae</i>            | <i>Flavobacteriales</i>             | <i>Flavobacteria</i>          | <i>Bacteroidetes</i>     | <i>Bacteria</i> |
| Otu0012 | 1.91              | 0.7               | 7.72                  | 1.73                | 54.78                | unclass. <i>Comamonadaceae</i>      | <i>Comamonadaceae</i>               | <i>Burkholderiales</i>              | <i>Betaproteobacteria</i>     | <i>Proteobacteria</i>    | <i>Bacteria</i> |
| Otu0052 | 1.66              | 0.69              | 8.94                  | 1.7                 | 56.49                | unclass. <i>Betaproteobacteria</i>  | unclass. <i>Betaproteobacteria</i>  | unclass. <i>Betaproteobacteria</i>  | <i>Betaproteobacteria</i>     | <i>Proteobacteria</i>    | <i>Bacteria</i> |
| Otu1822 | 1.87              | 0.62              | 1.16                  | 1.54                | 58.02                | unclass. <i>Flavobacteriales</i>    | unclass. <i>Flavobacteriales</i>    | <i>Flavobacteriales</i>             | <i>Flavobacteria</i>          | <i>Bacteroidetes</i>     | <i>Bacteria</i> |
| Otu0157 | 1.46              | 0.59              | 4.76                  | 1.44                | 59.47                | unclass. <i>Gammaproteobacteria</i> | unclass. <i>Gammaproteobacteria</i> | unclass. <i>Gammaproteobacteria</i> | <i>Gammaproteobacteria</i>    | <i>Proteobacteria</i>    | <i>Bacteria</i> |
| Otu0261 | 1.66              | 0.55              | 2.86                  | 1.36                | 60.83                | <i>Winogradskyella</i>              | <i>Flavobacteriaceae</i>            | <i>Flavobacteriales</i>             | <i>Flavobacteria</i>          | <i>Bacteroidetes</i>     | <i>Bacteria</i> |
| Otu0013 | 1.35              | 0.49              | 4.29                  | 1.21                | 62.04                | unclass. <i>Flavobacteriaceae</i>   | <i>Flavobacteriaceae</i>            | <i>Flavobacteriales</i>             | <i>Flavobacteria</i>          | <i>Bacteroidetes</i>     | <i>Bacteria</i> |
| Otu0076 | 1.64              | 0.48              | 1.16                  | 1.18                | 63.22                | unclass. <i>Flammeovirgaceae</i>    | <i>Flammeovirgaceae</i>             | <i>Sphingobacteriales</i>           | <i>Sphingobacteria</i>        | <i>Bacteroidetes</i>     | <i>Bacteria</i> |
| Otu0267 | 1.23              | 0.48              | 8.25                  | 1.17                | 64.39                | unclass. <i>Flavobacteriaceae</i>   | <i>Flavobacteriaceae</i>            | <i>Flavobacteriales</i>             | <i>Flavobacteria</i>          | <i>Bacteroidetes</i>     | <i>Bacteria</i> |
| Otu0713 | 1.17              | 0.48              | 8.36                  | 1.17                | 65.57                | unclass. <i>Bacteria</i>            | unclass. <i>Bacteria</i>            | unclass. <i>Bacteria</i>            | unclass. <i>Bacteria</i>      | unclass. <i>Bacteria</i> | <i>Bacteria</i> |
| Otu0341 | 1.38              | 0.43              | 1.14                  | 1.06                | 66.63                | unclass. <i>Gammaproteobacteria</i> | unclass. <i>Gammaproteobacteria</i> | unclass. <i>Gammaproteobacteria</i> | <i>Gammaproteobacteria</i>    | <i>Proteobacteria</i>    | <i>Bacteria</i> |
| Otu0163 | 1.46              | 0.38              | 1.07                  | 0.93                | 67.56                | unclass. <i>Gammaproteobacteria</i> | unclass. <i>Gammaproteobacteria</i> | unclass. <i>Gammaproteobacteria</i> | <i>Gammaproteobacteria</i>    | <i>Proteobacteria</i>    | <i>Bacteria</i> |
| Otu0262 | 1.29              | 0.37              | 1.07                  | 0.91                | 68.47                | unclass. <i>Gammaproteobacteria</i> | unclass. <i>Gammaproteobacteria</i> | unclass. <i>Gammaproteobacteria</i> | <i>Gammaproteobacteria</i>    | <i>Proteobacteria</i>    | <i>Bacteria</i> |
| Otu1694 | 1.78              | 0.37              | 0.62                  | 0.9                 | 69.37                | unclass. <i>Flavobacteriales</i>    | unclass. <i>Flavobacteriales</i>    | <i>Flavobacteriales</i>             | <i>Flavobacteria</i>          | <i>Bacteroidetes</i>     | <i>Bacteria</i> |
| Otu0213 | 1.05              | 0.33              | 1.12                  | 0.82                | 70.19                | unclass. <i>Gammaproteobacteria</i> | unclass. <i>Gammaproteobacteria</i> | unclass. <i>Gammaproteobacteria</i> | <i>Gammaproteobacteria</i>    | <i>Proteobacteria</i>    | <i>Bacteria</i> |
| Otu0022 | 1.09              | 0.31              | 1.08                  | 0.77                | 70.95                | unclass. <i>Betaproteobacteria</i>  | unclass. <i>Betaproteobacteria</i>  | unclass. <i>Betaproteobacteria</i>  | <i>Betaproteobacteria</i>     | <i>Proteobacteria</i>    | <i>Bacteria</i> |
| Otu0001 | 1.24              | 0.31              | 1.08                  | 0.76                | 71.71                | unclass. <i>Flavobacteriaceae</i>   | <i>Flavobacteriaceae</i>            | <i>Flavobacteriales</i>             | <i>Flavobacteria</i>          | <i>Bacteroidetes</i>     | <i>Bacteria</i> |
| Otu0094 | 1.09              | 0.3               | 1.08                  | 0.75                | 72.46                | unclass. <i>Flavobacteriaceae</i>   | <i>Flavobacteriaceae</i>            | <i>Flavobacteriales</i>             | <i>Flavobacteria</i>          | <i>Bacteroidetes</i>     | <i>Bacteria</i> |
| Otu0032 | 1.03              | 0.3               | 1.13                  | 0.73                | 73.19                | unclass. <i>Gammaproteobacteria</i> | unclass. <i>Gammaproteobacteria</i> | unclass. <i>Gammaproteobacteria</i> | <i>Gammaproteobacteria</i>    | <i>Proteobacteria</i>    | <i>Bacteria</i> |
| Otu0270 | 1.03              | 0.29              | 1.14                  | 0.73                | 73.91                | unclass. <i>Bacteroidetes</i>       | unclass. <i>Bacteroidetes</i>       | unclass. <i>Bacteroidetes</i>       | unclass. <i>Bacteroidetes</i> | <i>Bacteroidetes</i>     | <i>Bacteria</i> |
| Otu0291 | 1.03              | 0.29              | 1.14                  | 0.73                | 74.64                | unclass. <i>Flavobacteriaceae</i>   | <i>Flavobacteriaceae</i>            | <i>Flavobacteriales</i>             | <i>Flavobacteria</i>          | <i>Bacteroidetes</i>     | <i>Bacteria</i> |
| Otu0177 | 1.03              | 0.29              | 1.14                  | 0.72                | 75.36                | <i>Haliea</i>                       | <i>Alteromonadaceae</i>             | <i>Alteromonadales</i>              | <i>Gammaproteobacteria</i>    | <i>Proteobacteria</i>    | <i>Bacteria</i> |
| Otu0113 | 0.8               | 0.28              | 1.16                  | 0.68                | 76.04                | <i>Colwellia</i>                    | <i>Colwelliaceae</i>                | <i>Alteromonadales</i>              | <i>Gammaproteobacteria</i>    | <i>Proteobacteria</i>    | <i>Bacteria</i> |

| OTU     | Av.A <sub>i</sub> | Av.S <sub>i</sub> | Av.S <sub>i</sub> /SD | Av.S <sub>i</sub> % | ∑Av.S <sub>i</sub> % | Genus                               | Family                              | Order                               | Class                         | Phylum                   | Domain          |
|---------|-------------------|-------------------|-----------------------|---------------------|----------------------|-------------------------------------|-------------------------------------|-------------------------------------|-------------------------------|--------------------------|-----------------|
| Otu0056 | 0.95              | 0.28              | 1.16                  | 0.68                | 76.72                | unclass. <i>Gammaproteobacteria</i> | unclass. <i>Gammaproteobacteria</i> | unclass. <i>Gammaproteobacteria</i> | <i>Gammaproteobacteria</i>    | <i>Proteobacteria</i>    | <i>Bacteria</i> |
| Otu0621 | 0.88              | 0.28              | 1.16                  | 0.68                | 77.41                | <i>Colwellia</i>                    | <i>Colwelliaceae</i>                | <i>Alteromonadales</i>              | <i>Gammaproteobacteria</i>    | <i>Proteobacteria</i>    | <i>Bacteria</i> |
| Otu0025 | 1                 | 0.27              | 1.16                  | 0.68                | 78.08                | <i>Polaribacter</i>                 | <i>Flavobacteriaceae</i>            | <i>Flavobacteriales</i>             | <i>Flavobacteria</i>          | <i>Bacteroidetes</i>     | <i>Bacteria</i> |
| Otu0232 | 0.88              | 0.27              | 1.16                  | 0.68                | 78.76                | unclass. <i>Rhodobacteraceae</i>    | <i>Rhodobacteraceae</i>             | <i>Rhodobacterales</i>              | <i>Alphaproteobacteria</i>    | <i>Proteobacteria</i>    | <i>Bacteria</i> |
| Otu0009 | 1                 | 0.27              | 1.16                  | 0.68                | 79.43                | unclass. <i>Rhodobacteraceae</i>    | <i>Rhodobacteraceae</i>             | <i>Rhodobacterales</i>              | <i>Alphaproteobacteria</i>    | <i>Proteobacteria</i>    | <i>Bacteria</i> |
| Otu0042 | 0.88              | 0.27              | 1.16                  | 0.68                | 80.11                | <i>Rhodococcus</i>                  | <i>Nocardiaceae</i>                 | <i>Actinomycetales</i>              | <i>Actinobacteria</i>         | <i>Actinobacteria</i>    | <i>Bacteria</i> |
| Otu0234 | 0.88              | 0.27              | 1.16                  | 0.68                | 80.78                | <i>Arcobacter</i>                   | <i>Campylobacteraceae</i>           | <i>Campylobacterales</i>            | <i>Epsilonproteobacteria</i>  | <i>Proteobacteria</i>    | <i>Bacteria</i> |
| Otu0508 | 0.8               | 0.27              | 1.16                  | 0.68                | 81.46                | unclass. <i>Flavobacteriales</i>    | unclass. <i>Flavobacteriales</i>    | <i>Flavobacteriales</i>             | <i>Flavobacteria</i>          | <i>Bacteroidetes</i>     | <i>Bacteria</i> |
| Otu0172 | 0.88              | 0.27              | 1.16                  | 0.67                | 82.13                | unclass. <i>Gammaproteobacteria</i> | unclass. <i>Gammaproteobacteria</i> | unclass. <i>Gammaproteobacteria</i> | <i>Gammaproteobacteria</i>    | <i>Proteobacteria</i>    | <i>Bacteria</i> |
| Otu1119 | 0.8               | 0.27              | 1.16                  | 0.67                | 82.79                | unclass. <i>Bacteroidetes</i>       | unclass. <i>Bacteroidetes</i>       | unclass. <i>Bacteroidetes</i>       | unclass. <i>Bacteroidetes</i> | <i>Bacteroidetes</i>     | <i>Bacteria</i> |
| Otu1720 | 1.22              | 0.23              | 0.6                   | 0.58                | 83.37                | unclass. <i>Bacteria</i>            | unclass. <i>Bacteria</i>            | unclass. <i>Bacteria</i>            | unclass. <i>Bacteria</i>      | unclass. <i>Bacteria</i> | <i>Bacteria</i> |
| Otu0041 | 1.09              | 0.23              | 0.62                  | 0.57                | 83.94                | <i>Sulfitobacter</i>                | <i>Rhodobacteraceae</i>             | <i>Rhodobacterales</i>              | <i>Alphaproteobacteria</i>    | <i>Proteobacteria</i>    | <i>Bacteria</i> |
| Otu0026 | 1.22              | 0.23              | 0.6                   | 0.57                | 84.51                | unclass. <i>Rhodobacteraceae</i>    | <i>Rhodobacteraceae</i>             | <i>Rhodobacterales</i>              | <i>Alphaproteobacteria</i>    | <i>Proteobacteria</i>    | <i>Bacteria</i> |
| Otu1937 | 0.91              | 0.2               | 0.62                  | 0.49                | 85                   | unclass. <i>Gammaproteobacteria</i> | unclass. <i>Gammaproteobacteria</i> | unclass. <i>Gammaproteobacteria</i> | <i>Gammaproteobacteria</i>    | <i>Proteobacteria</i>    | <i>Bacteria</i> |
| Otu0062 | 1.17              | 0.19              | 0.62                  | 0.47                | 85.47                | <i>Haliea</i>                       | <i>Alteromonadaceae</i>             | <i>Alteromonadales</i>              | <i>Gammaproteobacteria</i>    | <i>Proteobacteria</i>    | <i>Bacteria</i> |
| Otu1828 | 1.09              | 0.19              | 0.57                  | 0.46                | 85.92                | unclass. <i>Chromatiales</i>        | unclass. <i>Chromatiales</i>        | <i>Chromatiales</i>                 | <i>Gammaproteobacteria</i>    | <i>Proteobacteria</i>    | <i>Bacteria</i> |
| Otu0753 | 1.09              | 0.19              | 0.57                  | 0.46                | 86.38                | unclass. <i>Flavobacteriales</i>    | unclass. <i>Flavobacteriales</i>    | <i>Flavobacteriales</i>             | <i>Flavobacteria</i>          | <i>Bacteroidetes</i>     | <i>Bacteria</i> |
| Otu0164 | 0.93              | 0.16              | 0.61                  | 0.39                | 86.77                | <i>Croceibacter</i>                 | <i>Flavobacteriaceae</i>            | <i>Flavobacteriales</i>             | <i>Flavobacteria</i>          | <i>Bacteroidetes</i>     | <i>Bacteria</i> |
| Otu1146 | 0.83              | 0.15              | 0.61                  | 0.38                | 87.15                | <i>Nitrospira</i>                   | <i>Nitrosomonadaceae</i>            | <i>Nitrosomonadales</i>             | <i>Betaproteobacteria</i>     | <i>Proteobacteria</i>    | <i>Bacteria</i> |
| Otu0124 | 1.01              | 0.15              | 0.61                  | 0.38                | 87.53                | <i>Loktanella</i>                   | <i>Rhodobacteraceae</i>             | <i>Rhodobacterales</i>              | <i>Alphaproteobacteria</i>    | <i>Proteobacteria</i>    | <i>Bacteria</i> |
| Otu0203 | 0.83              | 0.15              | 0.61                  | 0.38                | 87.91                | <i>Pelagibacter</i>                 | SAR11-clade                         | <i>Rickettsiales</i>                | <i>Alphaproteobacteria</i>    | <i>Proteobacteria</i>    | <i>Bacteria</i> |
| Otu0140 | 0.77              | 0.15              | 0.61                  | 0.38                | 88.29                | <i>Oleispira</i>                    | <i>Oceanospirillaceae</i>           | <i>Oceanospirillales</i>            | <i>Gammaproteobacteria</i>    | <i>Proteobacteria</i>    | <i>Bacteria</i> |
| Otu1723 | 0.77              | 0.15              | 0.61                  | 0.38                | 88.67                | unclass. <i>Bacteroidetes</i>       | unclass. <i>Bacteroidetes</i>       | unclass. <i>Bacteroidetes</i>       | unclass. <i>Bacteroidetes</i> | <i>Bacteroidetes</i>     | <i>Bacteria</i> |
| Otu0359 | 0.68              | 0.14              | 0.62                  | 0.34                | 89.01                | unclass. <i>Gammaproteobacteria</i> | unclass. <i>Gammaproteobacteria</i> | unclass. <i>Gammaproteobacteria</i> | <i>Gammaproteobacteria</i>    | <i>Proteobacteria</i>    | <i>Bacteria</i> |
| Otu0282 | 0.68              | 0.14              | 0.62                  | 0.34                | 89.36                | <i>Haliea</i>                       | <i>Alteromonadaceae</i>             | <i>Alteromonadales</i>              | <i>Gammaproteobacteria</i>    | <i>Proteobacteria</i>    | <i>Bacteria</i> |
| Otu0313 | 0.68              | 0.14              | 0.62                  | 0.34                | 89.7                 | unclass. <i>Gammaproteobacteria</i> | unclass. <i>Gammaproteobacteria</i> | unclass. <i>Gammaproteobacteria</i> | <i>Gammaproteobacteria</i>    | <i>Proteobacteria</i>    | <i>Bacteria</i> |
| Otu0878 | 0.6               | 0.14              | 0.62                  | 0.34                | 90.04                | unclass. <i>Bacteria</i>            | unclass. <i>Bacteria</i>            | unclass. <i>Bacteria</i>            | unclass. <i>Bacteria</i>      | unclass. <i>Bacteria</i> | <i>Bacteria</i> |

| OTU                                                                    | Av.A <sub>i</sub> | Av.S <sub>i</sub> | Av.S <sub>i</sub> /SD | Av.S <sub>i</sub> % | ∑Av.S <sub>i</sub> % | Genus                                 | Family                                | Order                                 | Class                        | Phylum                | Domain          |
|------------------------------------------------------------------------|-------------------|-------------------|-----------------------|---------------------|----------------------|---------------------------------------|---------------------------------------|---------------------------------------|------------------------------|-----------------------|-----------------|
| Winter 'serial dilution' pH <i>in situ</i> (average similarity: 67.6%) |                   |                   |                       |                     |                      |                                       |                                       |                                       |                              |                       |                 |
| Otu0106                                                                | 12.27             | 15.17             | 6.64                  | 22.43               | 22.43                | <i>Marinomonas</i>                    | <i>Oceanospirillaceae</i>             | <i>Oceanospirillales</i>              | <i>Gammaproteobacteria</i>   | <i>Proteobacteria</i> | <i>Bacteria</i> |
| Otu0132                                                                | 8.64              | 10.31             | 12.97                 | 15.24               | 37.68                | unclass. <i>Alteromonadales</i>       | unclass. <i>Alteromonadales</i>       | <i>Alteromonadales</i>                | <i>Gammaproteobacteria</i>   | <i>Proteobacteria</i> | <i>Bacteria</i> |
| Otu0055                                                                | 9.17              | 9.42              | 1.68                  | 13.93               | 51.61                | <i>Colwellia</i>                      | <i>Colwelliaceae</i>                  | <i>Alteromonadales</i>                | <i>Gammaproteobacteria</i>   | <i>Proteobacteria</i> | <i>Bacteria</i> |
| Otu1777                                                                | 5.49              | 6.5               | 5.78                  | 9.61                | 61.22                | <i>Oceaniserpentilla</i>              | <i>Oceanospirillaceae</i>             | <i>Oceanospirillales</i>              | <i>Gammaproteobacteria</i>   | <i>Proteobacteria</i> | <i>Bacteria</i> |
| Otu0160                                                                | 5.46              | 5.3               | 2.27                  | 7.83                | 69.05                | <i>Colwellia</i>                      | <i>Colwelliaceae</i>                  | <i>Alteromonadales</i>                | <i>Gammaproteobacteria</i>   | <i>Proteobacteria</i> | <i>Bacteria</i> |
| Otu0123                                                                | 5.62              | 5.01              | 3.57                  | 7.41                | 76.45                | unclass. <i>Gammaproteobacteria</i>   | unclass. <i>Gammaproteobacteria</i>   | unclass. <i>Gammaproteobacteria</i>   | <i>Gammaproteobacteria</i>   | <i>Proteobacteria</i> | <i>Bacteria</i> |
| Otu0471                                                                | 4.28              | 4.46              | 3.87                  | 6.59                | 83.04                | <i>Oceaniserpentilla</i>              | <i>Oceanospirillaceae</i>             | <i>Oceanospirillales</i>              | <i>Gammaproteobacteria</i>   | <i>Proteobacteria</i> | <i>Bacteria</i> |
| Otu0571                                                                | 1.95              | 2.27              | 4.25                  | 3.35                | 86.4                 | <i>Marinomonas</i>                    | <i>Oceanospirillaceae</i>             | <i>Oceanospirillales</i>              | <i>Gammaproteobacteria</i>   | <i>Proteobacteria</i> | <i>Bacteria</i> |
| Otu0035                                                                | 2.68              | 2.22              | 3.52                  | 3.28                | 89.67                | <i>Colwellia</i>                      | <i>Colwelliaceae</i>                  | <i>Alteromonadales</i>                | <i>Gammaproteobacteria</i>   | <i>Proteobacteria</i> | <i>Bacteria</i> |
| Otu0209                                                                | 1.54              | 1.53              | 3.16                  | 2.26                | 91.93                | unclass. <i>Oceanospirillales</i>     | unclass. <i>Oceanospirillales</i>     | <i>Oceanospirillales</i>              | <i>Gammaproteobacteria</i>   | <i>Proteobacteria</i> | <i>Bacteria</i> |
| Winter 'serial dilution' pH 7.67 (average similarity: 73.6%)           |                   |                   |                       |                     |                      |                                       |                                       |                                       |                              |                       |                 |
| Otu0117                                                                | 14.6              | 18.3              | 9.49                  | 24.85               | 24.85                | <i>Arcobacter</i>                     | <i>Campylobacteraceae</i>             | <i>Campylobacterales</i>              | <i>Epsilonproteobacteria</i> | <i>Proteobacteria</i> | <i>Bacteria</i> |
| Otu0106                                                                | 7.72              | 8.81              | 4.15                  | 11.96               | 36.81                | <i>Marinomonas</i>                    | <i>Oceanospirillaceae</i>             | <i>Oceanospirillales</i>              | <i>Gammaproteobacteria</i>   | <i>Proteobacteria</i> | <i>Bacteria</i> |
| Otu1748                                                                | 6.37              | 7.52              | 5.26                  | 10.21               | 47.02                | unclass. <i>Epsilonproteobacteria</i> | unclass. <i>Epsilonproteobacteria</i> | unclass. <i>Epsilonproteobacteria</i> | <i>Epsilonproteobacteria</i> | <i>Proteobacteria</i> | <i>Bacteria</i> |
| Otu1777                                                                | 5.32              | 6.56              | 8.77                  | 8.91                | 55.93                | <i>Oceaniserpentilla</i>              | <i>Oceanospirillaceae</i>             | <i>Oceanospirillales</i>              | <i>Gammaproteobacteria</i>   | <i>Proteobacteria</i> | <i>Bacteria</i> |
| Otu0234                                                                | 4.68              | 5.34              | 5.33                  | 7.25                | 63.18                | <i>Arcobacter</i>                     | <i>Campylobacteraceae</i>             | <i>Campylobacterales</i>              | <i>Epsilonproteobacteria</i> | <i>Proteobacteria</i> | <i>Bacteria</i> |
| Otu0686                                                                | 5.23              | 4.89              | 2.28                  | 6.64                | 69.83                | <i>Marinomonas</i>                    | <i>Oceanospirillaceae</i>             | <i>Oceanospirillales</i>              | <i>Gammaproteobacteria</i>   | <i>Proteobacteria</i> | <i>Bacteria</i> |
| Otu0132                                                                | 4.05              | 4.69              | 6.41                  | 6.36                | 76.19                | unclass. <i>Alteromonadales</i>       | unclass. <i>Alteromonadales</i>       | <i>Alteromonadales</i>                | <i>Gammaproteobacteria</i>   | <i>Proteobacteria</i> | <i>Bacteria</i> |
| Otu0055                                                                | 4.54              | 3.89              | 2.05                  | 5.28                | 81.47                | <i>Colwellia</i>                      | <i>Colwelliaceae</i>                  | <i>Alteromonadales</i>                | <i>Gammaproteobacteria</i>   | <i>Proteobacteria</i> | <i>Bacteria</i> |
| Otu0123                                                                | 2.75              | 2.66              | 5.33                  | 3.61                | 85.08                | unclass. <i>Gammaproteobacteria</i>   | unclass. <i>Gammaproteobacteria</i>   | unclass. <i>Gammaproteobacteria</i>   | <i>Gammaproteobacteria</i>   | <i>Proteobacteria</i> | <i>Bacteria</i> |
| Otu1780                                                                | 1.81              | 1.89              | 2.99                  | 2.57                | 87.65                | unclass. <i>Oceanospirillales</i>     | unclass. <i>Oceanospirillales</i>     | <i>Oceanospirillales</i>              | <i>Gammaproteobacteria</i>   | <i>Proteobacteria</i> | <i>Bacteria</i> |
| Otu1801                                                                | 1.31              | 1.51              | 4.86                  | 2.05                | 89.7                 | <i>Arcobacter</i>                     | <i>Campylobacteraceae</i>             | <i>Campylobacterales</i>              | <i>Epsilonproteobacteria</i> | <i>Proteobacteria</i> | <i>Bacteria</i> |
| Otu0209                                                                | 1.38              | 1.1               | 1.08                  | 1.49                | 91.19                | unclass. <i>Oceanospirillales</i>     | unclass. <i>Oceanospirillales</i>     | <i>Oceanospirillales</i>              | <i>Gammaproteobacteria</i>   | <i>Proteobacteria</i> | <i>Bacteria</i> |
