# Supplementary material for: Small Changes in pH Have Direct Effects on Marine Bacterial Community Composition: A Microcosm Approach
Source: PubMed Central journal article supplement (PMC3469576; doi:10.1371/journal.pone.0047035), 2012-10-11
Supplement: pone.0047035.s008.pdf [file pone.0047035.s008.pdf]

**Table S4. Results of the SIMPER analysis giving the dissimilarities between pH *in situ* levels of the different dilution treatments, separately for each season.**

Displayed are the OTUs (16S ribosomal amplicon pyrosequencing) that predominantly contributed to 90% of to the total dissimilarity.  $Av.A_i$ : average abundance of the *i* th species over all samples of the treatment (no: 'no dilution', serial: 'serial dilution', initial: 'initial dilution'),  $Av.\delta_i$ : average contribution of the *i* th species to the total dissimilarity,  $Av.\delta_i/SD$ : the average value of the *i* th species as a discriminating species,  $Av.\delta_i\%$ : average percentage contribution of the *i* th species to the total dissimilarity,  $\sum Av.\delta_i\%$ : average cumulative contribution to the total dissimilarity.

| OTU                                                                                         | $Av.A_i$<br>(no) | $Av.A_i$<br>(serial) | $Av.\delta_i$ | $Av.\delta_i/SD$ | $Av.\delta_i\%$ | $\sum Av.\delta_i\%$ | Genus                               | Family                              | Order                               | Class                         | Phylum                | Domain          |
|---------------------------------------------------------------------------------------------|------------------|----------------------|---------------|------------------|-----------------|----------------------|-------------------------------------|-------------------------------------|-------------------------------------|-------------------------------|-----------------------|-----------------|
| Spring pH <i>in situ</i> 'no dilution' vs. 'serial dilution' (average dissimilarity: 93.1%) |                  |                      |               |                  |                 |                      |                                     |                                     |                                     |                               |                       |                 |
| Otu0027                                                                                     | 1.37             | 11.23                | 5.93          | 1.51             | 6.37            | 6.37                 | <i>Pseudoalteromonas</i>            | <i>Pseudoalteromonadaceae</i>       | <i>Alteromonadales</i>              | <i>Gammaproteobacteria</i>    | <i>Proteobacteria</i> | <i>Bacteria</i> |
| Otu0005                                                                                     | 9.45             | 0                    | 5.65          | 2.92             | 6.07            | 12.44                | <i>Pelagibacter</i>                 | SAR11-clade                         | <i>Rickettsiales</i>                | <i>Alphaproteobacteria</i>    | <i>Proteobacteria</i> | <i>Bacteria</i> |
| Otu0035                                                                                     | 0.97             | 9.32                 | 5.05          | 1.18             | 5.43            | 17.87                | <i>Colwellia</i>                    | <i>Colwelliaceae</i>                | <i>Alteromonadales</i>              | <i>Gammaproteobacteria</i>    | <i>Proteobacteria</i> | <i>Bacteria</i> |
| Otu0106                                                                                     | 0                | 7.05                 | 4.29          | 2.19             | 4.61            | 22.48                | <i>Marinomonas</i>                  | <i>Oceanospirillaceae</i>           | <i>Oceanospirillales</i>            | <i>Gammaproteobacteria</i>    | <i>Proteobacteria</i> | <i>Bacteria</i> |
| Otu0134                                                                                     | 7.21             | 0                    | 4.28          | 3.58             | 4.6             | 27.08                | unclass. <i>Gammaproteobacteria</i> | unclass. <i>Gammaproteobacteria</i> | unclass. <i>Gammaproteobacteria</i> | <i>Gammaproteobacteria</i>    | <i>Proteobacteria</i> | <i>Bacteria</i> |
| Otu0002                                                                                     | 6.43             | 0                    | 3.77          | 2.16             | 4.05            | 31.14                | unclass. <i>Flavobacteriaceae</i>   | <i>Flavobacteriaceae</i>            | <i>Flavobacteriales</i>             | <i>Flavobacteria</i>          | <i>Bacteroidetes</i>  | <i>Bacteria</i> |
| Otu0001                                                                                     | 6.06             | 0                    | 3.57          | 1.67             | 3.83            | 34.97                | unclass. <i>Flavobacteriaceae</i>   | <i>Flavobacteriaceae</i>            | <i>Flavobacteriales</i>             | <i>Flavobacteria</i>          | <i>Bacteroidetes</i>  | <i>Bacteria</i> |
| Otu0029                                                                                     | 5.69             | 0                    | 3.37          | 4.89             | 3.62            | 38.6                 | unclass. <i>Bacteroidetes</i>       | unclass. <i>Bacteroidetes</i>       | unclass. <i>Bacteroidetes</i>       | unclass. <i>Bacteroidetes</i> | <i>Bacteroidetes</i>  | <i>Bacteria</i> |
| Otu0022                                                                                     | 5.16             | 0                    | 3.06          | 5.65             | 3.29            | 41.89                | unclass. <i>Betaproteobacteria</i>  | unclass. <i>Betaproteobacteria</i>  | unclass. <i>Betaproteobacteria</i>  | <i>Betaproteobacteria</i>     | <i>Proteobacteria</i> | <i>Bacteria</i> |
| Otu0008                                                                                     | 5.12             | 0                    | 3.04          | 5.33             | 3.26            | 45.15                | unclass. <i>Gammaproteobacteria</i> | unclass. <i>Gammaproteobacteria</i> | unclass. <i>Gammaproteobacteria</i> | <i>Gammaproteobacteria</i>    | <i>Proteobacteria</i> | <i>Bacteria</i> |
| Otu0010                                                                                     | 3.32             | 3.24                 | 2.74          | 1.28             | 2.95            | 48.1                 | unclass. <i>Flavobacteriaceae</i>   | <i>Flavobacteriaceae</i>            | <i>Flavobacteriales</i>             | <i>Flavobacteria</i>          | <i>Bacteroidetes</i>  | <i>Bacteria</i> |
| Otu0012                                                                                     | 4.52             | 0                    | 2.67          | 3.07             | 2.87            | 50.97                | unclass. <i>Comamonadaceae</i>      | <i>Comamonadaceae</i>               | <i>Burkholderiales</i>              | <i>Betaproteobacteria</i>     | <i>Proteobacteria</i> | <i>Bacteria</i> |

| OTU     | Av.A <sub>i</sub><br>(no) | Av.A <sub>i</sub><br>(serial) | Av.δ <sub>i</sub> | Av.δ <sub>i</sub> /SD | Av.δ <sub>i</sub> % | ΣAv.δ <sub>i</sub> % | Genus                               | Family                              | Order                               | Class                         | Phylum                 | Domain          |
|---------|---------------------------|-------------------------------|-------------------|-----------------------|---------------------|----------------------|-------------------------------------|-------------------------------------|-------------------------------------|-------------------------------|------------------------|-----------------|
| Otu0107 | 0                         | 4.07                          | 2.39              | 3.76                  | 2.56                | 53.53                | unclass. <i>Rhodobacteraceae</i>    | <i>Rhodobacteraceae</i>             | <i>Rhodobacterales</i>              | <i>Alphaproteobacteria</i>    | <i>Proteobacteria</i>  | <i>Bacteria</i> |
| Otu0014 | 3.76                      | 0                             | 2.24              | 1.81                  | 2.41                | 55.94                | <i>Reinekea</i>                     | <i>Oceanospirillaceae</i>           | <i>Oceanospirillales</i>            | <i>Gammaproteobacteria</i>    | <i>Proteobacteria</i>  | <i>Bacteria</i> |
| Otu0135 | 3.24                      | 0                             | 1.92              | 2.74                  | 2.06                | 58                   | unclass. <i>Gammaproteobacteria</i> | unclass. <i>Gammaproteobacteria</i> | unclass. <i>Gammaproteobacteria</i> | <i>Gammaproteobacteria</i>    | <i>Proteobacteria</i>  | <i>Bacteria</i> |
| Otu0007 | 3.2                       | 0                             | 1.89              | 1.93                  | 2.03                | 60.03                | unclass. <i>Flavobacteriales</i>    | unclass. <i>Flavobacteriales</i>    | <i>Flavobacteriales</i>             | <i>Flavobacteria</i>          | <i>Bacteroidetes</i>   | <i>Bacteria</i> |
| Otu0036 | 0.75                      | 3.68                          | 1.75              | 1.91                  | 1.88                | 61.91                | <i>Glaciecola</i>                   | <i>Alteromonadaceae</i>             | <i>Alteromonadales</i>              | <i>Gammaproteobacteria</i>    | <i>Proteobacteria</i>  | <i>Bacteria</i> |
| Otu0013 | 2.74                      | 0.2                           | 1.51              | 2.25                  | 1.62                | 63.53                | unclass. <i>Flavobacteriaceae</i>   | <i>Flavobacteriaceae</i>            | <i>Flavobacteriales</i>             | <i>Flavobacteria</i>          | <i>Bacteroidetes</i>   | <i>Bacteria</i> |
| Otu0111 | 0                         | 2.28                          | 1.42              | 1.4                   | 1.52                | 65.05                | <i>Marinomonas</i>                  | <i>Oceanospirillaceae</i>           | <i>Oceanospirillales</i>            | <i>Gammaproteobacteria</i>    | <i>Proteobacteria</i>  | <i>Bacteria</i> |
| Otu0018 | 1.91                      | 0                             | 1.12              | 2.71                  | 1.21                | 66.26                | unclass. <i>Puniceococcaceae</i>    | <i>Puniceococcaceae</i>             | <i>Puniceococcales</i>              | <i>Opitutae</i>               | <i>Verrucomicrobia</i> | <i>Bacteria</i> |
| Otu0020 | 1.78                      | 0                             | 1.07              | 1.53                  | 1.15                | 67.41                | unclass. <i>Flammeovirgaceae</i>    | <i>Flammeovirgaceae</i>             | <i>Sphingobacteriales</i>           | <i>Sphingobacteria</i>        | <i>Bacteroidetes</i>   | <i>Bacteria</i> |
| Otu0139 | 1.76                      | 0                             | 1.03              | 1.68                  | 1.11                | 68.52                | unclass. <i>Gammaproteobacteria</i> | unclass. <i>Gammaproteobacteria</i> | unclass. <i>Gammaproteobacteria</i> | <i>Gammaproteobacteria</i>    | <i>Proteobacteria</i>  | <i>Bacteria</i> |
| Otu0113 | 0.6                       | 1.95                          | 1.02              | 1.1                   | 1.09                | 69.61                | <i>Colwellia</i>                    | <i>Colwelliaceae</i>                | <i>Alteromonadales</i>              | <i>Gammaproteobacteria</i>    | <i>Proteobacteria</i>  | <i>Bacteria</i> |
| Otu0044 | 1.63                      | 0                             | 0.96              | 4.27                  | 1.03                | 70.64                | unclass. <i>Gammaproteobacteria</i> | unclass. <i>Gammaproteobacteria</i> | unclass. <i>Gammaproteobacteria</i> | <i>Gammaproteobacteria</i>    | <i>Proteobacteria</i>  | <i>Bacteria</i> |
| Otu0056 | 1.59                      | 0                             | 0.95              | 2.9                   | 1.02                | 71.66                | unclass. <i>Gammaproteobacteria</i> | unclass. <i>Gammaproteobacteria</i> | unclass. <i>Gammaproteobacteria</i> | <i>Gammaproteobacteria</i>    | <i>Proteobacteria</i>  | <i>Bacteria</i> |
| Otu0109 | 0                         | 1.72                          | 0.91              | 0.58                  | 0.97                | 72.63                | <i>Alteromonas</i>                  | <i>Alteromonadaceae</i>             | <i>Alteromonadales</i>              | <i>Gammaproteobacteria</i>    | <i>Proteobacteria</i>  | <i>Bacteria</i> |
| Otu0015 | 1.5                       | 0                             | 0.89              | 1.68                  | 0.95                | 73.59                | <i>Polaribacter</i>                 | <i>Flavobacteriaceae</i>            | <i>Flavobacteriales</i>             | <i>Flavobacteria</i>          | <i>Bacteroidetes</i>   | <i>Bacteria</i> |
| Otu0052 | 1.49                      | 0                             | 0.88              | 2.59                  | 0.94                | 74.53                | unclass. <i>Betaproteobacteria</i>  | unclass. <i>Betaproteobacteria</i>  | unclass. <i>Betaproteobacteria</i>  | <i>Betaproteobacteria</i>     | <i>Proteobacteria</i>  | <i>Bacteria</i> |
| Otu0041 | 1.76                      | 0.89                          | 0.81              | 1.43                  | 0.88                | 75.4                 | <i>Sulfitobacter</i>                | <i>Rhodobacteraceae</i>             | <i>Rhodobacterales</i>              | <i>Alphaproteobacteria</i>    | <i>Proteobacteria</i>  | <i>Bacteria</i> |
| Otu0108 | 0                         | 1.4                           | 0.79              | 1.26                  | 0.85                | 76.25                | unclass. <i>Colwelliaceae</i>       | <i>Colwelliaceae</i>                | <i>Alteromonadales</i>              | <i>Gammaproteobacteria</i>    | <i>Proteobacteria</i>  | <i>Bacteria</i> |
| Otu0059 | 0                         | 1.29                          | 0.77              | 1                     | 0.83                | 77.08                | <i>Flavobacterium</i>               | <i>Flavobacteriaceae</i>            | <i>Flavobacteriales</i>             | <i>Flavobacteria</i>          | <i>Bacteroidetes</i>   | <i>Bacteria</i> |
| Otu0123 | 0                         | 1.12                          | 0.66              | 0.96                  | 0.71                | 77.79                | unclass. <i>Gammaproteobacteria</i> | unclass. <i>Gammaproteobacteria</i> | unclass. <i>Gammaproteobacteria</i> | <i>Gammaproteobacteria</i>    | <i>Proteobacteria</i>  | <i>Bacteria</i> |
| Otu0132 | 0                         | 1.08                          | 0.65              | 1.14                  | 0.7                 | 78.48                | unclass. <i>Alteromonadales</i>     | unclass. <i>Alteromonadales</i>     | <i>Alteromonadales</i>              | <i>Gammaproteobacteria</i>    | <i>Proteobacteria</i>  | <i>Bacteria</i> |
| Otu0017 | 1                         | 0                             | 0.57              | 0.78                  | 0.61                | 79.1                 | unclass. <i>Flavobacteriales</i>    | unclass. <i>Flavobacteriales</i>    | <i>Flavobacteriales</i>             | <i>Flavobacteria</i>          | <i>Bacteroidetes</i>   | <i>Bacteria</i> |
| Otu0115 | 0                         | 1.02                          | 0.53              | 0.49                  | 0.57                | 79.67                | <i>Glaciecola</i>                   | <i>Alteromonadaceae</i>             | <i>Alteromonadales</i>              | <i>Gammaproteobacteria</i>    | <i>Proteobacteria</i>  | <i>Bacteria</i> |
| Otu0006 | 0.88                      | 0                             | 0.5               | 0.73                  | 0.54                | 80.21                | <i>Polaribacter</i>                 | <i>Flavobacteriaceae</i>            | <i>Flavobacteriales</i>             | <i>Flavobacteria</i>          | <i>Bacteroidetes</i>   | <i>Bacteria</i> |
| Otu0110 | 0                         | 0.96                          | 0.5               | 0.49                  | 0.54                | 80.74                | unclass. <i>Rhodobacteraceae</i>    | <i>Rhodobacteraceae</i>             | <i>Rhodobacterales</i>              | <i>Alphaproteobacteria</i>    | <i>Proteobacteria</i>  | <i>Bacteria</i> |
| Otu0055 | 1.08                      | 0.91                          | 0.48              | 1.31                  | 0.52                | 81.26                | <i>Colwellia</i>                    | <i>Colwelliaceae</i>                | <i>Alteromonadales</i>              | <i>Gammaproteobacteria</i>    | <i>Proteobacteria</i>  | <i>Bacteria</i> |
| Otu0136 | 0.68                      | 0                             | 0.41              | 0.78                  | 0.44                | 81.7                 | unclass. <i>Bacteroidetes</i>       | unclass. <i>Bacteroidetes</i>       | unclass. <i>Bacteroidetes</i>       | unclass. <i>Bacteroidetes</i> | <i>Bacteroidetes</i>   | <i>Bacteria</i> |

| OTU     | Av.A <sub>i</sub><br>(no) | Av.A <sub>i</sub><br>(serial) | Av.δ <sub>i</sub> | Av.δ <sub>i</sub> /SD | Av.δ <sub>i</sub> % | ΣAv.δ <sub>i</sub> % | Genus                               | Family                                | Order                               | Class                         | Phylum                | Domain          |
|---------|---------------------------|-------------------------------|-------------------|-----------------------|---------------------|----------------------|-------------------------------------|---------------------------------------|-------------------------------------|-------------------------------|-----------------------|-----------------|
| Otu0114 | 0                         | 0.75                          | 0.41              | 0.8                   | 0.44                | 82.14                | <i>Shewanella</i>                   | <i>Shewanellaceae</i>                 | <i>Alteromonadales</i>              | <i>Gammaproteobacteria</i>    | <i>Proteobacteria</i> | <i>Bacteria</i> |
| Otu0039 | 0                         | 0.68                          | 0.39              | 1.15                  | 0.42                | 82.56                | <i>Pseudoalteromonas</i>            | <i>Pseudoalteromonadaceae</i>         | <i>Alteromonadales</i>              | <i>Gammaproteobacteria</i>    | <i>Proteobacteria</i> | <i>Bacteria</i> |
| Otu0009 | 0.63                      | 0                             | 0.37              | 0.79                  | 0.4                 | 82.96                | unclass. <i>Rhodobacteraceae</i>    | <i>Rhodobacteraceae</i>               | <i>Rhodobacterales</i>              | <i>Alphaproteobacteria</i>    | <i>Proteobacteria</i> | <i>Bacteria</i> |
| Otu0175 | 0.6                       | 0                             | 0.35              | 1.19                  | 0.38                | 83.34                | unclass. <i>Flavobacteriaceae</i>   | <i>Flavobacteriaceae</i>              | <i>Flavobacteriales</i>             | <i>Flavobacteria</i>          | <i>Bacteroidetes</i>  | <i>Bacteria</i> |
| Otu0151 | 0.6                       | 0                             | 0.35              | 1.19                  | 0.38                | 83.72                | <i>Rhodococcus</i>                  | <i>Nocardiaceae</i>                   | <i>Actinomycetales</i>              | <i>Actinobacteria</i>         | <i>Actinobacteria</i> | <i>Bacteria</i> |
| Otu0160 | 0.57                      | 0                             | 0.34              | 0.8                   | 0.36                | 84.08                | <i>Colwellia</i>                    | <i>Colwelliaceae</i>                  | <i>Alteromonadales</i>              | <i>Gammaproteobacteria</i>    | <i>Proteobacteria</i> | <i>Bacteria</i> |
| Otu0032 | 0.55                      | 0                             | 0.32              | 0.74                  | 0.35                | 84.43                | unclass. <i>Gammaproteobacteria</i> | unclass. <i>Gammaproteobacteria</i>   | unclass. <i>Gammaproteobacteria</i> | <i>Gammaproteobacteria</i>    | <i>Proteobacteria</i> | <i>Bacteria</i> |
| Otu0176 | 0.2                       | 0.48                          | 0.32              | 0.88                  | 0.34                | 84.77                | <i>Colwellia</i>                    | <i>Colwelliaceae</i>                  | <i>Alteromonadales</i>              | <i>Gammaproteobacteria</i>    | <i>Proteobacteria</i> | <i>Bacteria</i> |
| Otu0120 | 0                         | 0.48                          | 0.3               | 0.77                  | 0.32                | 85.09                | <i>Pseudoalteromonas</i>            | <i>Pseudoalteromonadaceae</i>         | <i>Alteromonadales</i>              | <i>Gammaproteobacteria</i>    | <i>Proteobacteria</i> | <i>Bacteria</i> |
| Otu0011 | 0.48                      | 0                             | 0.29              | 0.78                  | 0.31                | 85.4                 | unclass. <i>Flavobacteriaceae</i>   | <i>Flavobacteriaceae</i>              | <i>Flavobacteriales</i>             | <i>Flavobacteria</i>          | <i>Bacteroidetes</i>  | <i>Bacteria</i> |
| Otu0118 | 0.4                       | 0.4                           | 0.29              | 0.94                  | 0.31                | 85.71                | <i>Colwellia</i>                    | <i>Colwelliaceae</i>                  | <i>Alteromonadales</i>              | <i>Gammaproteobacteria</i>    | <i>Proteobacteria</i> | <i>Bacteria</i> |
| Otu0019 | 0.48                      | 0                             | 0.28              | 0.78                  | 0.3                 | 86.01                | unclass. <i>Gammaproteobacteria</i> | unclass. <i>Gammaproteobacteria</i>   | unclass. <i>Gammaproteobacteria</i> | <i>Gammaproteobacteria</i>    | <i>Proteobacteria</i> | <i>Bacteria</i> |
| Otu0068 | 0.48                      | 0                             | 0.28              | 0.78                  | 0.3                 | 86.3                 | <i>Pelagibacter</i>                 | SAR11-clade                           | <i>Rickettsiales</i>                | <i>Alphaproteobacteria</i>    | <i>Proteobacteria</i> | <i>Bacteria</i> |
| Otu0112 | 0                         | 0.48                          | 0.26              | 0.79                  | 0.28                | 86.59                | <i>Polaribacter</i>                 | <i>Flavobacteriaceae</i>              | <i>Flavobacteriales</i>             | <i>Flavobacteria</i>          | <i>Bacteroidetes</i>  | <i>Bacteria</i> |
| Otu0227 | 0.4                       | 0                             | 0.24              | 0.8                   | 0.26                | 86.85                | unclass. <i>Gammaproteobacteria</i> | unclass. <i>Gammaproteobacteria</i>   | unclass. <i>Gammaproteobacteria</i> | <i>Gammaproteobacteria</i>    | <i>Proteobacteria</i> | <i>Bacteria</i> |
| Otu0133 | 0.4                       | 0                             | 0.24              | 0.8                   | 0.26                | 87.11                | <i>Colwellia</i>                    | <i>Colwelliaceae</i>                  | <i>Alteromonadales</i>              | <i>Gammaproteobacteria</i>    | <i>Proteobacteria</i> | <i>Bacteria</i> |
| Otu0141 | 0.4                       | 0                             | 0.24              | 0.8                   | 0.26                | 87.36                | unclass. <i>Bacteroidetes</i>       | unclass. <i>Bacteroidetes</i>         | unclass. <i>Bacteroidetes</i>       | unclass. <i>Bacteroidetes</i> | <i>Bacteroidetes</i>  | <i>Bacteria</i> |
| Otu0159 | 0.4                       | 0                             | 0.24              | 0.8                   | 0.26                | 87.62                | unclass. <i>Saprospiraceae</i>      | <i>Saprospiraceae</i>                 | <i>Sphingobacteriales</i>           | <i>Sphingobacteria</i>        | <i>Bacteroidetes</i>  | <i>Bacteria</i> |
| Otu0042 | 0.4                       | 0                             | 0.24              | 0.8                   | 0.26                | 87.88                | <i>Rhodococcus</i>                  | <i>Nocardiaceae</i>                   | <i>Actinomycetales</i>              | <i>Actinobacteria</i>         | <i>Actinobacteria</i> | <i>Bacteria</i> |
| Otu0157 | 0.4                       | 0                             | 0.24              | 0.8                   | 0.26                | 88.14                | unclass. <i>Gammaproteobacteria</i> | unclass. <i>Gammaproteobacteria</i>   | unclass. <i>Gammaproteobacteria</i> | <i>Gammaproteobacteria</i>    | <i>Proteobacteria</i> | <i>Bacteria</i> |
| Otu0164 | 0.4                       | 0                             | 0.24              | 0.8                   | 0.26                | 88.39                | <i>Croceibacter</i>                 | <i>Flavobacteriaceae</i>              | <i>Flavobacteriales</i>             | <i>Flavobacteria</i>          | <i>Bacteroidetes</i>  | <i>Bacteria</i> |
| Otu0147 | 0.4                       | 0                             | 0.24              | 0.8                   | 0.26                | 88.65                | <i>Dasania</i>                      | <i>Pseudomonadales_incertae_sedis</i> | <i>Pseudomonadales</i>              | <i>Gammaproteobacteria</i>    | <i>Proteobacteria</i> | <i>Bacteria</i> |
| Otu0140 | 0                         | 0.4                           | 0.23              | 0.8                   | 0.25                | 88.9                 | <i>Oleispira</i>                    | <i>Oceanospirillaceae</i>             | <i>Oceanospirillales</i>            | <i>Gammaproteobacteria</i>    | <i>Proteobacteria</i> | <i>Bacteria</i> |
| Otu0051 | 0.4                       | 0                             | 0.23              | 0.8                   | 0.25                | 89.15                | unclass. <i>Flavobacteriaceae</i>   | <i>Flavobacteriaceae</i>              | <i>Flavobacteriales</i>             | <i>Flavobacteria</i>          | <i>Bacteroidetes</i>  | <i>Bacteria</i> |
| Otu0124 | 0                         | 0.4                           | 0.21              | 0.49                  | 0.22                | 89.37                | <i>Loktanella</i>                   | <i>Rhodobacteraceae</i>               | <i>Rhodobacterales</i>              | <i>Alphaproteobacteria</i>    | <i>Proteobacteria</i> | <i>Bacteria</i> |
| Otu0003 | 0.28                      | 0                             | 0.17              | 0.49                  | 0.18                | 89.56                | unclass. <i>Rhodobacteraceae</i>    | <i>Rhodobacteraceae</i>               | <i>Rhodobacterales</i>              | <i>Alphaproteobacteria</i>    | <i>Proteobacteria</i> | <i>Bacteria</i> |
| Otu0143 | 0.28                      | 0                             | 0.17              | 0.49                  | 0.18                | 89.74                | unclass. <i>Gammaproteobacteria</i> | unclass. <i>Gammaproteobacteria</i>   | unclass. <i>Gammaproteobacteria</i> | <i>Gammaproteobacteria</i>    | <i>Proteobacteria</i> | <i>Bacteria</i> |

| OTU                                                                                         | Av.A <sub>i</sub><br>(no) | Av.A <sub>i</sub><br>(serial) | Av.δ <sub>i</sub> | Av.δ <sub>i</sub> /SD | Av.δ <sub>i</sub> % | ∑Av.δ <sub>i</sub> % | Genus                              | Family                             | Order                              | Class                          | Phylum                   | Domain          |
|---------------------------------------------------------------------------------------------|---------------------------|-------------------------------|-------------------|-----------------------|---------------------|----------------------|------------------------------------|------------------------------------|------------------------------------|--------------------------------|--------------------------|-----------------|
| Otu0339                                                                                     | 0.28                      | 0                             | 0.17              | 0.49                  | 0.18                | 89.93                | unclass. <i>Proteobacteria</i>     | unclass. <i>Proteobacteria</i>     | unclass. <i>Proteobacteria</i>     | unclass. <i>Proteobacteria</i> | <i>Proteobacteria</i>    | <i>Bacteria</i> |
| Otu0137                                                                                     | 0.28                      | 0                             | 0.17              | 0.49                  | 0.18                | 90.11                | unclass. <i>Bacteroidetes</i>      | unclass. <i>Bacteroidetes</i>      | unclass. <i>Bacteroidetes</i>      | unclass. <i>Bacteroidetes</i>  | <i>Bacteroidetes</i>     | <i>Bacteria</i> |
| Summer pH <i>in situ</i> 'no dilution' vs. 'serial dilution' (average dissimilarity: 97.4%) |                           |                               |                   |                       |                     |                      |                                    |                                    |                                    |                                |                          |                 |
| Otu0005                                                                                     | 15.27                     | 0.2                           | 7.06              | 6.15                  | 7.25                | 7.25                 | <i>Pelagibacter</i>                | SAR11-clade                        | <i>Rickettsiales</i>               | <i>Alphaproteobacteria</i>     | <i>Proteobacteria</i>    | <i>Bacteria</i> |
| Otu0132                                                                                     | 0                         | 11.11                         | 5.44              | 1.45                  | 5.59                | 12.83                | unclass. <i>Alteromonadales</i>    | unclass. <i>Alteromonadales</i>    | <i>Alteromonadales</i>             | <i>Gammaproteobacteria</i>     | <i>Proteobacteria</i>    | <i>Bacteria</i> |
| Otu0459                                                                                     | 0.2                       | 10.06                         | 4.44              | 1.97                  | 4.56                | 17.39                | <i>Croceibacter</i>                | <i>Flavobacteriaceae</i>           | <i>Flavobacteriales</i>            | <i>Flavobacteria</i>           | <i>Bacteroidetes</i>     | <i>Bacteria</i> |
| Otu0471                                                                                     | 0                         | 6.52                          | 3.06              | 2.58                  | 3.14                | 20.53                | <i>Oceaniserpentilla</i>           | <i>Oceanospirillaceae</i>          | <i>Oceanospirillales</i>           | <i>Gammaproteobacteria</i>     | <i>Proteobacteria</i>    | <i>Bacteria</i> |
| Otu0691                                                                                     | 5.44                      | 0                             | 2.52              | 3.59                  | 2.59                | 23.12                | <i>Planctomyces</i>                | <i>Planctomycetaceae</i>           | <i>Planctomycetales</i>            | <i>Planctomycetacia</i>        | <i>Planctomycetes</i>    | <i>Bacteria</i> |
| Otu0001                                                                                     | 4.58                      | 0                             | 2.14              | 4.15                  | 2.2                 | 25.32                | unclass. <i>Flavobacteriaceae</i>  | <i>Flavobacteriaceae</i>           | <i>Flavobacteriales</i>            | <i>Flavobacteria</i>           | <i>Bacteroidetes</i>     | <i>Bacteria</i> |
| Otu0125                                                                                     | 0                         | 4.15                          | 1.86              | 1.61                  | 1.91                | 27.23                | <i>Leeuwenhoekella</i>             | <i>Flavobacteriaceae</i>           | <i>Flavobacteriales</i>            | <i>Flavobacteria</i>           | <i>Bacteroidetes</i>     | <i>Bacteria</i> |
| Otu0521                                                                                     | 1.08                      | 4.58                          | 1.74              | 1.56                  | 1.78                | 29.01                | unclass. <i>Rhodobacteraceae</i>   | <i>Rhodobacteraceae</i>            | <i>Rhodobacterales</i>             | <i>Alphaproteobacteria</i>     | <i>Proteobacteria</i>    | <i>Bacteria</i> |
| Otu0693                                                                                     | 3.22                      | 0                             | 1.51              | 2.16                  | 1.55                | 30.56                | <i>Planctomyces</i>                | <i>Planctomycetaceae</i>           | <i>Planctomycetales</i>            | <i>Planctomycetacia</i>        | <i>Planctomycetes</i>    | <i>Bacteria</i> |
| Otu0003                                                                                     | 3.21                      | 0                             | 1.5               | 6.09                  | 1.54                | 32.1                 | unclass. <i>Rhodobacteraceae</i>   | <i>Rhodobacteraceae</i>            | <i>Rhodobacterales</i>             | <i>Alphaproteobacteria</i>     | <i>Proteobacteria</i>    | <i>Bacteria</i> |
| Otu0203                                                                                     | 3.14                      | 0                             | 1.47              | 2.64                  | 1.51                | 33.61                | <i>Pelagibacter</i>                | SAR11-clade                        | <i>Rickettsiales</i>               | <i>Alphaproteobacteria</i>     | <i>Proteobacteria</i>    | <i>Bacteria</i> |
| Otu0460                                                                                     | 0.28                      | 3.42                          | 1.42              | 1.1                   | 1.46                | 35.07                | <i>Arcobacter</i>                  | <i>Campylobacteraceae</i>          | <i>Campylobacterales</i>           | <i>Epsilonproteobacteria</i>   | <i>Proteobacteria</i>    | <i>Bacteria</i> |
| Otu0052                                                                                     | 2.91                      | 0                             | 1.36              | 4.3                   | 1.4                 | 36.47                | unclass. <i>Betaproteobacteria</i> | unclass. <i>Betaproteobacteria</i> | unclass. <i>Betaproteobacteria</i> | <i>Betaproteobacteria</i>      | <i>Proteobacteria</i>    | <i>Bacteria</i> |
| Otu0525                                                                                     | 0                         | 2.2                           | 1.02              | 2.08                  | 1.05                | 37.52                | <i>Reinekea</i>                    | <i>Oceanospirillaceae</i>          | <i>Oceanospirillales</i>           | <i>Gammaproteobacteria</i>     | <i>Proteobacteria</i>    | <i>Bacteria</i> |
| Otu0692                                                                                     | 2.21                      | 0                             | 1.02              | 2.53                  | 1.05                | 38.57                | unclass. <i>Bacteria</i>           | unclass. <i>Bacteria</i>           | unclass. <i>Bacteria</i>           | unclass. <i>Bacteria</i>       | unclass. <i>Bacteria</i> | <i>Bacteria</i> |
| Otu0523                                                                                     | 0                         | 2.3                           | 1.02              | 1.57                  | 1.04                | 39.61                | <i>Pseudidiomarina</i>             | <i>Idiomarinaceae</i>              | <i>Alteromonadales</i>             | <i>Gammaproteobacteria</i>     | <i>Proteobacteria</i>    | <i>Bacteria</i> |
| Otu0007                                                                                     | 2.06                      | 0                             | 0.96              | 4.03                  | 0.99                | 40.6                 | unclass. <i>Flavobacteriales</i>   | unclass. <i>Flavobacteriales</i>   | <i>Flavobacteriales</i>            | <i>Flavobacteria</i>           | <i>Bacteroidetes</i>     | <i>Bacteria</i> |
| Otu0706                                                                                     | 1.99                      | 0                             | 0.93              | 3.93                  | 0.95                | 41.55                | unclass. <i>Planctomycetaceae</i>  | <i>Planctomycetaceae</i>           | <i>Planctomycetales</i>            | <i>Planctomycetacia</i>        | <i>Planctomycetes</i>    | <i>Bacteria</i> |
| Otu0524                                                                                     | 0                         | 1.85                          | 0.83              | 1.82                  | 0.85                | 42.4                 | <i>Pseudidiomarina</i>             | <i>Idiomarinaceae</i>              | <i>Alteromonadales</i>             | <i>Gammaproteobacteria</i>     | <i>Proteobacteria</i>    | <i>Bacteria</i> |
| Otu0461                                                                                     | 1.89                      | 0.2                           | 0.81              | 1.42                  | 0.83                | 43.22                | unclass. <i>Microbacteriaceae</i>  | <i>Microbacteriaceae</i>           | <i>Actinomycetales</i>             | <i>Actinobacteria</i>          | <i>Actinobacteria</i>    | <i>Bacteria</i> |
| Otu0519                                                                                     | 1.72                      | 0                             | 0.8               | 1.92                  | 0.82                | 44.05                | unclass. <i>Rhodospirillaceae</i>  | <i>Rhodospirillaceae</i>           | <i>Rhodospirillales</i>            | <i>Alphaproteobacteria</i>     | <i>Proteobacteria</i>    | <i>Bacteria</i> |
| Otu0450                                                                                     | 1.66                      | 0                             | 0.79              | 1.16                  | 0.81                | 44.86                | <i>Sphingobium</i>                 | <i>Sphingomonadaceae</i>           | <i>Sphingomonadales</i>            | <i>Alphaproteobacteria</i>     | <i>Proteobacteria</i>    | <i>Bacteria</i> |
| Otu0522                                                                                     | 0                         | 1.75                          | 0.78              | 1.8                   | 0.8                 | 45.65                | unclass. <i>Flavobacteriaceae</i>  | <i>Flavobacteriaceae</i>           | <i>Flavobacteriales</i>            | <i>Flavobacteria</i>           | <i>Bacteroidetes</i>     | <i>Bacteria</i> |
| Otu0531                                                                                     | 0                         | 1.7                           | 0.76              | 1.56                  | 0.78                | 46.43                | unclass. <i>Flavobacteriaceae</i>  | <i>Flavobacteriaceae</i>           | <i>Flavobacteriales</i>            | <i>Flavobacteria</i>           | <i>Bacteroidetes</i>     | <i>Bacteria</i> |

| OTU     | Av.A <sub>i</sub><br>(no) | Av.A <sub>i</sub><br>(serial) | Av.δ <sub>i</sub> | Av.δ <sub>i</sub> /SD | Av.δ <sub>i</sub> % | ΣAv.δ <sub>i</sub> % | Genus                               | Family                              | Order                               | Class                          | Phylum                   | Domain   |
|---------|---------------------------|-------------------------------|-------------------|-----------------------|---------------------|----------------------|-------------------------------------|-------------------------------------|-------------------------------------|--------------------------------|--------------------------|----------|
| Otu0512 | 1.58                      | 0                             | 0.75              | 1.41                  | 0.77                | 47.2                 | <i>Rhodopirellula</i>               | Planctomycetaceae                   | Planctomycetales                    | Planctomycetacia               | Planctomycetes           | Bacteria |
| Otu0473 | 1.63                      | 0                             | 0.74              | 2.45                  | 0.76                | 47.96                | unclass. <i>Alphaproteobacteria</i> | unclass. <i>Alphaproteobacteria</i> | unclass. <i>Alphaproteobacteria</i> | <i>Alphaproteobacteria</i>     | <i>Proteobacteria</i>    | Bacteria |
| Otu0495 | 1.53                      | 0                             | 0.7               | 1.69                  | 0.72                | 48.68                | unclass. <i>Flavobacteriales</i>    | unclass. <i>Flavobacteriales</i>    | <i>Flavobacteriales</i>             | <i>Flavobacteria</i>           | <i>Bacteroidetes</i>     | Bacteria |
| Otu0469 | 1.52                      | 0                             | 0.7               | 1.28                  | 0.72                | 49.4                 | unclass. <i>Bacteria</i>            | unclass. <i>Bacteria</i>            | unclass. <i>Bacteria</i>            | unclass. <i>Bacteria</i>       | unclass. <i>Bacteria</i> | Bacteria |
| Otu0068 | 1.51                      | 0                             | 0.7               | 4.41                  | 0.72                | 50.12                | <i>Pelagibacter</i>                 | SAR11-clade                         | <i>Rickettsiales</i>                | <i>Alphaproteobacteria</i>     | <i>Proteobacteria</i>    | Bacteria |
| Otu0463 | 1.43                      | 0                             | 0.67              | 3.25                  | 0.68                | 50.81                | unclass. <i>Flavobacteriaceae</i>   | <i>Flavobacteriaceae</i>            | <i>Flavobacteriales</i>             | <i>Flavobacteria</i>           | <i>Bacteroidetes</i>     | Bacteria |
| Otu0157 | 1.37                      | 0                             | 0.65              | 1.59                  | 0.67                | 51.48                | unclass. <i>Gammaproteobacteria</i> | unclass. <i>Gammaproteobacteria</i> | unclass. <i>Gammaproteobacteria</i> | <i>Gammaproteobacteria</i>     | <i>Proteobacteria</i>    | Bacteria |
| Otu0019 | 1.33                      | 0                             | 0.63              | 1.79                  | 0.65                | 52.12                | unclass. <i>Gammaproteobacteria</i> | unclass. <i>Gammaproteobacteria</i> | unclass. <i>Gammaproteobacteria</i> | <i>Gammaproteobacteria</i>     | <i>Proteobacteria</i>    | Bacteria |
| Otu0526 | 0                         | 1.39                          | 0.62              | 1.02                  | 0.64                | 52.76                | <i>Maribacter</i>                   | <i>Flavobacteriaceae</i>            | <i>Flavobacteriales</i>             | <i>Flavobacteria</i>           | <i>Bacteroidetes</i>     | Bacteria |
| Otu0537 | 0                         | 1.38                          | 0.62              | 1.75                  | 0.64                | 53.4                 | unclass. <i>Flavobacteriaceae</i>   | <i>Flavobacteriaceae</i>            | <i>Flavobacteriales</i>             | <i>Flavobacteria</i>           | <i>Bacteroidetes</i>     | Bacteria |
| Otu0046 | 1.29                      | 0                             | 0.62              | 1.72                  | 0.63                | 54.03                | unclass. <i>Flavobacteriaceae</i>   | <i>Flavobacteriaceae</i>            | <i>Flavobacteriales</i>             | <i>Flavobacteria</i>           | <i>Bacteroidetes</i>     | Bacteria |
| Otu0487 | 0                         | 1.38                          | 0.61              | 0.79                  | 0.63                | 54.66                | unclass. <i>Chitinophagaceae</i>    | <i>Chitinophagaceae</i>             | <i>Sphingobacteriales</i>           | <i>Sphingobacteria</i>         | <i>Bacteroidetes</i>     | Bacteria |
| Otu0053 | 1.29                      | 0                             | 0.58              | 1.53                  | 0.6                 | 55.26                | unclass. <i>Rhodobacteraceae</i>    | <i>Rhodobacteraceae</i>             | <i>Rhodobacterales</i>              | <i>Alphaproteobacteria</i>     | <i>Proteobacteria</i>    | Bacteria |
| Otu0705 | 1.19                      | 0                             | 0.55              | 1.18                  | 0.57                | 55.83                | <i>Planctomyces</i>                 | Planctomycetaceae                   | Planctomycetales                    | Planctomycetacia               | Planctomycetes           | Bacteria |
| Otu0695 | 1.12                      | 0                             | 0.53              | 0.8                   | 0.55                | 56.37                | unclass. <i>Proteobacteria</i>      | unclass. <i>Proteobacteria</i>      | unclass. <i>Proteobacteria</i>      | unclass. <i>Proteobacteria</i> | <i>Proteobacteria</i>    | Bacteria |
| Otu0549 | 0                         | 1.26                          | 0.53              | 0.49                  | 0.54                | 56.92                | unclass. <i>Bacteroidetes</i>       | unclass. <i>Bacteroidetes</i>       | unclass. <i>Bacteroidetes</i>       | unclass. <i>Bacteroidetes</i>  | <i>Bacteroidetes</i>     | Bacteria |
| Otu0123 | 0                         | 1.08                          | 0.53              | 1.18                  | 0.54                | 57.46                | unclass. <i>Gammaproteobacteria</i> | unclass. <i>Gammaproteobacteria</i> | unclass. <i>Gammaproteobacteria</i> | <i>Gammaproteobacteria</i>     | <i>Proteobacteria</i>    | Bacteria |
| Otu0503 | 1.15                      | 0                             | 0.52              | 1.65                  | 0.53                | 57.99                | unclass. <i>Bacteroidetes</i>       | unclass. <i>Bacteroidetes</i>       | unclass. <i>Bacteroidetes</i>       | unclass. <i>Bacteroidetes</i>  | <i>Bacteroidetes</i>     | Bacteria |
| Otu0354 | 1.11                      | 0                             | 0.51              | 1.76                  | 0.53                | 58.52                | <i>Andersenella</i>                 | <i>Rhodobiaceae</i>                 | <i>Rhizobiales</i>                  | <i>Alphaproteobacteria</i>     | <i>Proteobacteria</i>    | Bacteria |
| Otu0435 | 1.12                      | 0                             | 0.51              | 0.6                   | 0.53                | 59.05                | unclass. <i>Flavobacteriales</i>    | unclass. <i>Flavobacteriales</i>    | <i>Flavobacteriales</i>             | <i>Flavobacteria</i>           | <i>Bacteroidetes</i>     | Bacteria |
| Otu0289 | 1.08                      | 0                             | 0.5               | 0.99                  | 0.52                | 59.56                | unclass. <i>Bacteroidetes</i>       | unclass. <i>Bacteroidetes</i>       | unclass. <i>Bacteroidetes</i>       | unclass. <i>Bacteroidetes</i>  | <i>Bacteroidetes</i>     | Bacteria |
| Otu0027 | 0.2                       | 1.11                          | 0.5               | 0.78                  | 0.51                | 60.07                | <i>Pseudoalteromonas</i>            | <i>Pseudoalteromonadaceae</i>       | <i>Alteromonadales</i>              | <i>Gammaproteobacteria</i>     | <i>Proteobacteria</i>    | Bacteria |
| Otu0041 | 0.75                      | 0.88                          | 0.48              | 1.24                  | 0.49                | 60.56                | <i>Sulfitobacter</i>                | <i>Rhodobacteraceae</i>             | <i>Rhodobacterales</i>              | <i>Alphaproteobacteria</i>     | <i>Proteobacteria</i>    | Bacteria |
| Otu0703 | 1.03                      | 0                             | 0.48              | 1.67                  | 0.49                | 61.05                | unclass. <i>Gammaproteobacteria</i> | unclass. <i>Gammaproteobacteria</i> | unclass. <i>Gammaproteobacteria</i> | <i>Gammaproteobacteria</i>     | <i>Proteobacteria</i>    | Bacteria |
| Otu0502 | 1.03                      | 0                             | 0.48              | 1.76                  | 0.49                | 61.54                | unclass. <i>Gammaproteobacteria</i> | unclass. <i>Gammaproteobacteria</i> | unclass. <i>Gammaproteobacteria</i> | <i>Gammaproteobacteria</i>     | <i>Proteobacteria</i>    | Bacteria |
| Otu0186 | 0.97                      | 0                             | 0.46              | 1.79                  | 0.47                | 62.01                | unclass. <i>Planctomycetaceae</i>   | <i>Planctomycetaceae</i>            | <i>Planctomycetales</i>             | <i>Planctomycetacia</i>        | <i>Planctomycetes</i>    | Bacteria |
| Otu0704 | 0.97                      | 0                             | 0.46              | 1.82                  | 0.47                | 62.49                | unclass. <i>Proteobacteria</i>      | unclass. <i>Proteobacteria</i>      | unclass. <i>Proteobacteria</i>      | unclass. <i>Proteobacteria</i> | <i>Proteobacteria</i>    | Bacteria |

| OTU     | Av.A <sub>i</sub><br>(no) | Av.A <sub>i</sub><br>(serial) | Av.δ <sub>i</sub> | Av.δ <sub>i</sub> /SD | Av.δ <sub>i</sub> % | ΣAv.δ <sub>i</sub> % | Genus                                  | Family                              | Order                               | Class                         | Phylum                   | Domain          |
|---------|---------------------------|-------------------------------|-------------------|-----------------------|---------------------|----------------------|----------------------------------------|-------------------------------------|-------------------------------------|-------------------------------|--------------------------|-----------------|
| Otu0753 | 0.95                      | 0                             | 0.45              | 0.64                  | 0.46                | 62.95                | unclass. <i>Flavobacteriales</i>       | unclass. <i>Flavobacteriales</i>    | <i>Flavobacteriales</i>             | <i>Flavobacteria</i>          | <i>Bacteroidetes</i>     | <i>Bacteria</i> |
| Otu0245 | 0.97                      | 0                             | 0.45              | 1.77                  | 0.46                | 63.4                 | unclass. <i>Flavobacteriales</i>       | unclass. <i>Flavobacteriales</i>    | <i>Flavobacteriales</i>             | <i>Flavobacteria</i>          | <i>Bacteroidetes</i>     | <i>Bacteria</i> |
| Otu0084 | 0.93                      | 0                             | 0.43              | 1.02                  | 0.45                | 63.85                | unclass. <i>Gammaproteobacteria</i>    | unclass. <i>Gammaproteobacteria</i> | unclass. <i>Gammaproteobacteria</i> | <i>Gammaproteobacteria</i>    | <i>Proteobacteria</i>    | <i>Bacteria</i> |
| Otu0779 | 0.95                      | 0                             | 0.43              | 0.69                  | 0.44                | 64.29                | unclass. <i>Ectothiorhodospiraceae</i> | <i>Ectothiorhodospiraceae</i>       | <i>Chromatiales</i>                 | <i>Gammaproteobacteria</i>    | <i>Proteobacteria</i>    | <i>Bacteria</i> |
| Otu0029 | 0                         | 1                             | 0.42              | 0.49                  | 0.43                | 64.72                | unclass. <i>Bacteroidetes</i>          | unclass. <i>Bacteroidetes</i>       | unclass. <i>Bacteroidetes</i>       | unclass. <i>Bacteroidetes</i> | <i>Bacteroidetes</i>     | <i>Bacteria</i> |
| Otu0701 | 0.88                      | 0                             | 0.41              | 1.05                  | 0.42                | 65.14                | unclass. <i>Bacteria</i>               | unclass. <i>Bacteria</i>            | unclass. <i>Bacteria</i>            | unclass. <i>Bacteria</i>      | unclass. <i>Bacteria</i> | <i>Bacteria</i> |
| Otu0548 | 0                         | 0.98                          | 0.41              | 0.49                  | 0.42                | 65.57                | unclass. <i>Bacteroidetes</i>          | unclass. <i>Bacteroidetes</i>       | unclass. <i>Bacteroidetes</i>       | unclass. <i>Bacteroidetes</i> | <i>Bacteroidetes</i>     | <i>Bacteria</i> |
| Otu0010 | 0.88                      | 0                             | 0.41              | 1.74                  | 0.42                | 65.99                | unclass. <i>Flavobacteriaceae</i>      | <i>Flavobacteriaceae</i>            | <i>Flavobacteriales</i>             | <i>Flavobacteria</i>          | <i>Bacteroidetes</i>     | <i>Bacteria</i> |
| Otu0109 | 0                         | 0.88                          | 0.38              | 1.09                  | 0.39                | 66.38                | <i>Alteromonas</i>                     | <i>Alteromonadaceae</i>             | <i>Alteromonadales</i>              | <i>Gammaproteobacteria</i>    | <i>Proteobacteria</i>    | <i>Bacteria</i> |
| Otu0527 | 0                         | 0.83                          | 0.38              | 1.13                  | 0.39                | 66.77                | <i>Idiomarina</i>                      | <i>Idiomarinaceae</i>               | <i>Alteromonadales</i>              | <i>Gammaproteobacteria</i>    | <i>Proteobacteria</i>    | <i>Bacteria</i> |
| Otu0532 | 0.77                      | 0.88                          | 0.37              | 1.18                  | 0.38                | 67.15                | unclass. <i>Rhodobacteraceae</i>       | <i>Rhodobacteraceae</i>             | <i>Rhodobacterales</i>              | <i>Alphaproteobacteria</i>    | <i>Proteobacteria</i>    | <i>Bacteria</i> |
| Otu0611 | 0.72                      | 0                             | 0.35              | 0.49                  | 0.36                | 67.51                | unclass. <i>Bacteroidetes</i>          | unclass. <i>Bacteroidetes</i>       | unclass. <i>Bacteroidetes</i>       | unclass. <i>Bacteroidetes</i> | <i>Bacteroidetes</i>     | <i>Bacteria</i> |
| Otu0694 | 0.75                      | 0                             | 0.35              | 1.05                  | 0.36                | 67.87                | unclass. <i>Alphaproteobacteria</i>    | unclass. <i>Alphaproteobacteria</i> | unclass. <i>Alphaproteobacteria</i> | <i>Alphaproteobacteria</i>    | <i>Proteobacteria</i>    | <i>Bacteria</i> |
| Otu0408 | 0.75                      | 0                             | 0.34              | 1.13                  | 0.35                | 68.21                | unclass. <i>Flavobacteriaceae</i>      | <i>Flavobacteriaceae</i>            | <i>Flavobacteriales</i>             | <i>Flavobacteria</i>          | <i>Bacteroidetes</i>     | <i>Bacteria</i> |
| Otu0714 | 0.68                      | 0                             | 0.33              | 1.14                  | 0.34                | 68.55                | unclass. <i>Alphaproteobacteria</i>    | unclass. <i>Alphaproteobacteria</i> | unclass. <i>Alphaproteobacteria</i> | <i>Alphaproteobacteria</i>    | <i>Proteobacteria</i>    | <i>Bacteria</i> |
| Otu0504 | 0.68                      | 0                             | 0.33              | 1.14                  | 0.34                | 68.89                | unclass. <i>Alphaproteobacteria</i>    | unclass. <i>Alphaproteobacteria</i> | unclass. <i>Alphaproteobacteria</i> | <i>Alphaproteobacteria</i>    | <i>Proteobacteria</i>    | <i>Bacteria</i> |
| Otu0142 | 0.68                      | 0                             | 0.33              | 1.15                  | 0.34                | 69.23                | unclass. <i>Gammaproteobacteria</i>    | unclass. <i>Gammaproteobacteria</i> | unclass. <i>Gammaproteobacteria</i> | <i>Gammaproteobacteria</i>    | <i>Proteobacteria</i>    | <i>Bacteria</i> |
| Otu0696 | 0.68                      | 0                             | 0.33              | 1.13                  | 0.33                | 69.56                | unclass. <i>Flavobacteriaceae</i>      | <i>Flavobacteriaceae</i>            | <i>Flavobacteriales</i>             | <i>Flavobacteria</i>          | <i>Bacteroidetes</i>     | <i>Bacteria</i> |
| Otu0261 | 0.77                      | 0.4                           | 0.32              | 1.17                  | 0.33                | 69.89                | <i>Winogradskyella</i>                 | <i>Flavobacteriaceae</i>            | <i>Flavobacteriales</i>             | <i>Flavobacteria</i>          | <i>Bacteroidetes</i>     | <i>Bacteria</i> |
| Otu0700 | 0.68                      | 0                             | 0.31              | 1.17                  | 0.32                | 70.21                | unclass. <i>Alphaproteobacteria</i>    | unclass. <i>Alphaproteobacteria</i> | unclass. <i>Alphaproteobacteria</i> | <i>Alphaproteobacteria</i>    | <i>Proteobacteria</i>    | <i>Bacteria</i> |
| Otu0782 | 0.68                      | 0                             | 0.31              | 1.13                  | 0.32                | 70.52                | unclass. <i>Gammaproteobacteria</i>    | unclass. <i>Gammaproteobacteria</i> | unclass. <i>Gammaproteobacteria</i> | <i>Gammaproteobacteria</i>    | <i>Proteobacteria</i>    | <i>Bacteria</i> |
| Otu0048 | 0.63                      | 0                             | 0.3               | 0.79                  | 0.31                | 70.83                | unclass. <i>Flavobacteriaceae</i>      | <i>Flavobacteriaceae</i>            | <i>Flavobacteriales</i>             | <i>Flavobacteria</i>          | <i>Bacteroidetes</i>     | <i>Bacteria</i> |
| Otu0781 | 0.63                      | 0                             | 0.3               | 0.49                  | 0.3                 | 71.14                | unclass. <i>Thiotrichales</i>          | unclass. <i>Thiotrichales</i>       | <i>Thiotrichales</i>                | <i>Gammaproteobacteria</i>    | <i>Proteobacteria</i>    | <i>Bacteria</i> |
| Otu0697 | 0.6                       | 0                             | 0.29              | 1.18                  | 0.3                 | 71.43                | unclass. <i>Flavobacteriaceae</i>      | <i>Flavobacteriaceae</i>            | <i>Flavobacteriales</i>             | <i>Flavobacteria</i>          | <i>Bacteroidetes</i>     | <i>Bacteria</i> |
| Otu0020 | 0.63                      | 0                             | 0.28              | 0.79                  | 0.29                | 71.72                | unclass. <i>Flammeovirgaceae</i>       | <i>Flammeovirgaceae</i>             | <i>Sphingobacteriales</i>           | <i>Sphingobacteria</i>        | <i>Bacteroidetes</i>     | <i>Bacteria</i> |
| Otu0550 | 0.28                      | 0.49                          | 0.28              | 0.68                  | 0.29                | 72.01                | unclass. <i>Flavobacteriales</i>       | unclass. <i>Flavobacteriales</i>    | <i>Flavobacteriales</i>             | <i>Flavobacteria</i>          | <i>Bacteroidetes</i>     | <i>Bacteria</i> |
| Otu0505 | 0.63                      | 0                             | 0.28              | 0.79                  | 0.29                | 72.3                 | unclass. <i>Chitinophagaceae</i>       | <i>Chitinophagaceae</i>             | <i>Sphingobacteriales</i>           | <i>Sphingobacteria</i>        | <i>Bacteroidetes</i>     | <i>Bacteria</i> |

| OTU     | Av. A <sub>i</sub><br>(no) | Av. A <sub>i</sub><br>(serial) | Av. δ <sub>i</sub> | Av. δ <sub>i</sub> /SD | Av. δ <sub>i</sub> % | ΣAv. δ <sub>i</sub> % | Genus                               | Family                              | Order                               | Class                          | Phylum                   | Domain          |
|---------|----------------------------|--------------------------------|--------------------|------------------------|----------------------|-----------------------|-------------------------------------|-------------------------------------|-------------------------------------|--------------------------------|--------------------------|-----------------|
| Otu0737 | 0.63                       | 0                              | 0.28               | 0.79                   | 0.29                 | 72.58                 | unclass. <i>Gammaproteobacteria</i> | unclass. <i>Gammaproteobacteria</i> | unclass. <i>Gammaproteobacteria</i> | <i>Gammaproteobacteria</i>     | <i>Proteobacteria</i>    | <i>Bacteria</i> |
| Otu0110 | 0                          | 0.55                           | 0.28               | 0.72                   | 0.29                 | 72.87                 | unclass. <i>Rhodobacteraceae</i>    | <i>Rhodobacteraceae</i>             | <i>Rhodobacterales</i>              | <i>Alphaproteobacteria</i>     | <i>Proteobacteria</i>    | <i>Bacteria</i> |
| Otu0476 | 0.6                        | 0                              | 0.28               | 1.18                   | 0.28                 | 73.15                 | unclass. <i>Actinomycetales</i>     | unclass. <i>Actinomycetales</i>     | <i>Actinomycetales</i>              | <i>Actinobacteria</i>          | <i>Actinobacteria</i>    | <i>Bacteria</i> |
| Otu0272 | 0.6                        | 0                              | 0.28               | 1.18                   | 0.28                 | 73.43                 | unclass. <i>Flavobacteriaceae</i>   | <i>Flavobacteriaceae</i>            | <i>Flavobacteriales</i>             | <i>Flavobacteria</i>           | <i>Bacteroidetes</i>     | <i>Bacteria</i> |
| Otu0368 | 0.6                        | 0                              | 0.28               | 1.18                   | 0.28                 | 73.72                 | unclass. <i>Saprospiraceae</i>      | <i>Saprospiraceae</i>               | <i>Sphingobacteriales</i>           | <i>Sphingobacteria</i>         | <i>Bacteroidetes</i>     | <i>Bacteria</i> |
| Otu0191 | 0.6                        | 0                              | 0.28               | 1.18                   | 0.28                 | 74                    | unclass. <i>Proteobacteria</i>      | unclass. <i>Proteobacteria</i>      | unclass. <i>Proteobacteria</i>      | unclass. <i>Proteobacteria</i> | <i>Proteobacteria</i>    | <i>Bacteria</i> |
| Otu0485 | 0.6                        | 0                              | 0.28               | 1.18                   | 0.28                 | 74.28                 | unclass. <i>Alphaproteobacteria</i> | unclass. <i>Alphaproteobacteria</i> | unclass. <i>Alphaproteobacteria</i> | <i>Alphaproteobacteria</i>     | <i>Proteobacteria</i>    | <i>Bacteria</i> |
| Otu0468 | 0.57                       | 0                              | 0.27               | 0.79                   | 0.28                 | 74.56                 | unclass. <i>Flavobacteriaceae</i>   | <i>Flavobacteriaceae</i>            | <i>Flavobacteriales</i>             | <i>Flavobacteria</i>           | <i>Bacteroidetes</i>     | <i>Bacteria</i> |
| Otu0721 | 0.6                        | 0                              | 0.27               | 1.18                   | 0.28                 | 74.84                 | unclass. <i>Alphaproteobacteria</i> | unclass. <i>Alphaproteobacteria</i> | unclass. <i>Alphaproteobacteria</i> | <i>Alphaproteobacteria</i>     | <i>Proteobacteria</i>    | <i>Bacteria</i> |
| Otu0768 | 0.6                        | 0                              | 0.27               | 1.18                   | 0.28                 | 75.12                 | unclass. <i>Flavobacteriales</i>    | unclass. <i>Flavobacteriales</i>    | <i>Flavobacteriales</i>             | <i>Flavobacteria</i>           | <i>Bacteroidetes</i>     | <i>Bacteria</i> |
| Otu0533 | 0                          | 0.55                           | 0.25               | 0.77                   | 0.26                 | 75.37                 | <i>Nisaea</i>                       | <i>Rhodospirillaceae</i>            | <i>Rhodospirillales</i>             | <i>Alphaproteobacteria</i>     | <i>Proteobacteria</i>    | <i>Bacteria</i> |
| Otu0538 | 0                          | 0.48                           | 0.23               | 0.79                   | 0.24                 | 75.61                 | <i>Oceaniserpentilla</i>            | <i>Oceanospirillaceae</i>           | <i>Oceanospirillales</i>            | <i>Gammaproteobacteria</i>     | <i>Proteobacteria</i>    | <i>Bacteria</i> |
| Otu0080 | 0.48                       | 0                              | 0.23               | 0.77                   | 0.24                 | 75.85                 | <i>Polaribacter</i>                 | <i>Flavobacteriaceae</i>            | <i>Flavobacteriales</i>             | <i>Flavobacteria</i>           | <i>Bacteroidetes</i>     | <i>Bacteria</i> |
| Otu0497 | 0.48                       | 0                              | 0.23               | 0.77                   | 0.24                 | 76.09                 | <i>Opitutus</i>                     | <i>Opitutaceae</i>                  | <i>Opitutales</i>                   | <i>Opitutae</i>                | <i>Verrucomicrobia</i>   | <i>Bacteria</i> |
| Otu0754 | 0.48                       | 0                              | 0.23               | 0.77                   | 0.24                 | 76.33                 | unclass. <i>Flavobacteriales</i>    | unclass. <i>Flavobacteriales</i>    | <i>Flavobacteriales</i>             | <i>Flavobacteria</i>           | <i>Bacteroidetes</i>     | <i>Bacteria</i> |
| Otu0710 | 0.48                       | 0                              | 0.23               | 0.78                   | 0.23                 | 76.56                 | unclass. <i>Gammaproteobacteria</i> | unclass. <i>Gammaproteobacteria</i> | unclass. <i>Gammaproteobacteria</i> | <i>Gammaproteobacteria</i>     | <i>Proteobacteria</i>    | <i>Bacteria</i> |
| Otu0218 | 0.48                       | 0                              | 0.22               | 0.79                   | 0.22                 | 76.78                 | unclass. <i>Flavobacteriaceae</i>   | <i>Flavobacteriaceae</i>            | <i>Flavobacteriales</i>             | <i>Flavobacteria</i>           | <i>Bacteroidetes</i>     | <i>Bacteria</i> |
| Otu0758 | 0.48                       | 0                              | 0.22               | 0.79                   | 0.22                 | 77                    | unclass. <i>Bacteria</i>            | unclass. <i>Bacteria</i>            | unclass. <i>Bacteria</i>            | unclass. <i>Bacteria</i>       | unclass. <i>Bacteria</i> | <i>Bacteria</i> |
| Otu0221 | 0.48                       | 0                              | 0.22               | 0.76                   | 0.22                 | 77.22                 | unclass. <i>Flavobacteriaceae</i>   | <i>Flavobacteriaceae</i>            | <i>Flavobacteriales</i>             | <i>Flavobacteria</i>           | <i>Bacteroidetes</i>     | <i>Bacteria</i> |
| Otu0798 | 0.48                       | 0                              | 0.22               | 0.76                   | 0.22                 | 77.45                 | unclass. <i>Gammaproteobacteria</i> | unclass. <i>Gammaproteobacteria</i> | unclass. <i>Gammaproteobacteria</i> | <i>Gammaproteobacteria</i>     | <i>Proteobacteria</i>    | <i>Bacteria</i> |
| Otu0732 | 0.48                       | 0                              | 0.22               | 0.76                   | 0.22                 | 77.67                 | unclass. <i>Proteobacteria</i>      | unclass. <i>Proteobacteria</i>      | unclass. <i>Proteobacteria</i>      | unclass. <i>Proteobacteria</i> | <i>Proteobacteria</i>    | <i>Bacteria</i> |
| Otu0180 | 0                          | 0.48                           | 0.21               | 0.78                   | 0.22                 | 77.89                 | <i>Reichenbachiella</i>             | <i>Flammeovirgaceae</i>             | <i>Sphingobacteriales</i>           | <i>Sphingobacteria</i>         | <i>Bacteroidetes</i>     | <i>Bacteria</i> |
| Otu0529 | 0                          | 0.48                           | 0.21               | 0.78                   | 0.22                 | 78.11                 | unclass. <i>Sphingobacteriales</i>  | unclass. <i>Sphingobacteriales</i>  | <i>Sphingobacteriales</i>           | <i>Sphingobacteria</i>         | <i>Bacteroidetes</i>     | <i>Bacteria</i> |
| Otu0535 | 0                          | 0.48                           | 0.21               | 0.78                   | 0.22                 | 78.32                 | <i>Loktanelia</i>                   | <i>Rhodobacteraceae</i>             | <i>Rhodobacterales</i>              | <i>Alphaproteobacteria</i>     | <i>Proteobacteria</i>    | <i>Bacteria</i> |
| Otu0840 | 0.49                       | 0                              | 0.21               | 0.49                   | 0.21                 | 78.54                 | unclass. <i>Flavobacteriaceae</i>   | <i>Flavobacteriaceae</i>            | <i>Flavobacteriales</i>             | <i>Flavobacteria</i>           | <i>Bacteroidetes</i>     | <i>Bacteria</i> |
| Otu0038 | 0.4                        | 0                              | 0.2                | 0.79                   | 0.2                  | 78.74                 | unclass. <i>Proteobacteria</i>      | unclass. <i>Proteobacteria</i>      | unclass. <i>Proteobacteria</i>      | unclass. <i>Proteobacteria</i> | <i>Proteobacteria</i>    | <i>Bacteria</i> |
| Otu0216 | 0.4                        | 0                              | 0.2                | 0.79                   | 0.2                  | 78.94                 | <i>Pelagibacter</i>                 | SAR11-clade                         | <i>Rickettsiales</i>                | <i>Alphaproteobacteria</i>     | <i>Proteobacteria</i>    | <i>Bacteria</i> |

| OTU     | Av. A <sub>i</sub><br>(no) | Av. A <sub>i</sub><br>(serial) | Av. δ <sub>i</sub> | Av. δ <sub>i</sub> /SD | Av. δ <sub>i</sub> % | ΣAv. δ <sub>i</sub> % | Genus                               | Family                              | Order                               | Class                           | Phylum                   | Domain          |
|---------|----------------------------|--------------------------------|--------------------|------------------------|----------------------|-----------------------|-------------------------------------|-------------------------------------|-------------------------------------|---------------------------------|--------------------------|-----------------|
| Otu0735 | 0.4                        | 0                              | 0.19               | 0.79                   | 0.2                  | 79.13                 | unclass. <i>Gammaproteobacteria</i> | unclass. <i>Gammaproteobacteria</i> | unclass. <i>Gammaproteobacteria</i> | <i>Gammaproteobacteria</i>      | <i>Proteobacteria</i>    | <i>Bacteria</i> |
| Otu0745 | 0.4                        | 0                              | 0.19               | 0.79                   | 0.2                  | 79.33                 | <i>Planctomyces</i>                 | <i>Planctomycetaceae</i>            | <i>Planctomycetales</i>             | <i>Planctomycetacia</i>         | <i>Planctomycetes</i>    | <i>Bacteria</i> |
| Otu0002 | 0.4                        | 0                              | 0.19               | 0.79                   | 0.2                  | 79.53                 | unclass. <i>Flavobacteriaceae</i>   | <i>Flavobacteriaceae</i>            | <i>Flavobacteriales</i>             | <i>Flavobacteria</i>            | <i>Bacteroidetes</i>     | <i>Bacteria</i> |
| Otu0277 | 0.4                        | 0                              | 0.19               | 0.79                   | 0.2                  | 79.72                 | unclass. <i>Flavobacteriaceae</i>   | <i>Flavobacteriaceae</i>            | <i>Flavobacteriales</i>             | <i>Flavobacteria</i>            | <i>Bacteroidetes</i>     | <i>Bacteria</i> |
| Otu0724 | 0.4                        | 0                              | 0.19               | 0.79                   | 0.2                  | 79.92                 | unclass. <i>Bacteria</i>            | unclass. <i>Bacteria</i>            | unclass. <i>Bacteria</i>            | unclass. <i>Bacteria</i>        | unclass. <i>Bacteria</i> | <i>Bacteria</i> |
| Otu0746 | 0.4                        | 0                              | 0.19               | 0.79                   | 0.2                  | 80.12                 | unclass. <i>Flavobacteriaceae</i>   | <i>Flavobacteriaceae</i>            | <i>Flavobacteriales</i>             | <i>Flavobacteria</i>            | <i>Bacteroidetes</i>     | <i>Bacteria</i> |
| Otu0202 | 0.4                        | 0                              | 0.19               | 0.79                   | 0.2                  | 80.31                 | unclass. <i>Alteromonadaceae</i>    | <i>Alteromonadaceae</i>             | <i>Alteromonadales</i>              | <i>Gammaproteobacteria</i>      | <i>Proteobacteria</i>    | <i>Bacteria</i> |
| Otu0051 | 0.4                        | 0                              | 0.19               | 0.79                   | 0.2                  | 80.51                 | unclass. <i>Flavobacteriaceae</i>   | <i>Flavobacteriaceae</i>            | <i>Flavobacteriales</i>             | <i>Flavobacteria</i>            | <i>Bacteroidetes</i>     | <i>Bacteria</i> |
| Otu0352 | 0.4                        | 0                              | 0.19               | 0.79                   | 0.2                  | 80.71                 | unclass. <i>Flavobacteriaceae</i>   | <i>Flavobacteriaceae</i>            | <i>Flavobacteriales</i>             | <i>Flavobacteria</i>            | <i>Bacteroidetes</i>     | <i>Bacteria</i> |
| Otu0595 | 0.4                        | 0                              | 0.19               | 0.79                   | 0.2                  | 80.9                  | unclass. <i>Legionellaceae</i>      | <i>Legionellaceae</i>               | <i>Legionellales</i>                | <i>Gammaproteobacteria</i>      | <i>Proteobacteria</i>    | <i>Bacteria</i> |
| Otu0783 | 0.4                        | 0                              | 0.19               | 0.49                   | 0.19                 | 81.09                 | unclass. <i>Gammaproteobacteria</i> | unclass. <i>Gammaproteobacteria</i> | unclass. <i>Gammaproteobacteria</i> | <i>Gammaproteobacteria</i>      | <i>Proteobacteria</i>    | <i>Bacteria</i> |
| Otu0534 | 0                          | 0.4                            | 0.19               | 0.8                    | 0.19                 | 81.28                 | unclass. <i>Alphaproteobacteria</i> | unclass. <i>Alphaproteobacteria</i> | unclass. <i>Alphaproteobacteria</i> | <i>Alphaproteobacteria</i>      | <i>Proteobacteria</i>    | <i>Bacteria</i> |
| Otu0727 | 0.4                        | 0                              | 0.18               | 0.79                   | 0.19                 | 81.47                 | unclass. <i>Deltaproteobacteria</i> | unclass. <i>Deltaproteobacteria</i> | unclass. <i>Deltaproteobacteria</i> | <i>Deltaproteobacteria</i>      | <i>Proteobacteria</i>    | <i>Bacteria</i> |
| Otu0472 | 0.4                        | 0                              | 0.18               | 0.79                   | 0.19                 | 81.66                 | unclass. <i>Bacteroidetes</i>       | unclass. <i>Bacteroidetes</i>       | unclass. <i>Bacteroidetes</i>       | unclass. <i>Bacteroidetes</i>   | <i>Bacteroidetes</i>     | <i>Bacteria</i> |
| Otu0490 | 0.4                        | 0                              | 0.18               | 0.79                   | 0.19                 | 81.84                 | unclass. <i>Burkholderiales</i>     | unclass. <i>Burkholderiales</i>     | <i>Burkholderiales</i>              | <i>Betaproteobacteria</i>       | <i>Proteobacteria</i>    | <i>Bacteria</i> |
| Otu0766 | 0.4                        | 0                              | 0.18               | 0.79                   | 0.19                 | 82.03                 | <i>Lentisphaera</i>                 | <i>Lentisphaeraceae</i>             | <i>Lentisphaerales</i>              | <i>Lentisphaeria</i>            | <i>Lentisphaerae</i>     | <i>Bacteria</i> |
| Otu0774 | 0.4                        | 0                              | 0.18               | 0.79                   | 0.19                 | 82.22                 | unclass. <i>Bacteria</i>            | unclass. <i>Bacteria</i>            | unclass. <i>Bacteria</i>            | unclass. <i>Bacteria</i>        | unclass. <i>Bacteria</i> | <i>Bacteria</i> |
| Otu0541 | 0.4                        | 0                              | 0.18               | 0.79                   | 0.18                 | 82.4                  | unclass. <i>Rhodobacteraceae</i>    | <i>Rhodobacteraceae</i>             | <i>Rhodobacterales</i>              | <i>Alphaproteobacteria</i>      | <i>Proteobacteria</i>    | <i>Bacteria</i> |
| Otu0736 | 0.4                        | 0                              | 0.18               | 0.79                   | 0.18                 | 82.58                 | <i>Persicirhabdus</i>               | <i>Verrucomicrobiaceae</i>          | <i>Verrucomicrobiales</i>           | <i>Verrucomicrobiae</i>         | <i>Verrucomicrobia</i>   | <i>Bacteria</i> |
| Otu0811 | 0.4                        | 0                              | 0.18               | 0.79                   | 0.18                 | 82.76                 | unclass. <i>Bacteria</i>            | unclass. <i>Bacteria</i>            | unclass. <i>Bacteria</i>            | unclass. <i>Bacteria</i>        | unclass. <i>Bacteria</i> | <i>Bacteria</i> |
| Otu0255 | 0.4                        | 0                              | 0.18               | 0.79                   | 0.18                 | 82.95                 | <i>Sphingopyxis</i>                 | <i>Sphingomonadaceae</i>            | <i>Sphingomonadales</i>             | <i>Alphaproteobacteria</i>      | <i>Proteobacteria</i>    | <i>Bacteria</i> |
| Otu0467 | 0.4                        | 0                              | 0.18               | 0.79                   | 0.18                 | 83.13                 | unclass. <i>Rhodospirillaceae</i>   | <i>Rhodospirillaceae</i>            | <i>Rhodospirillales</i>             | <i>Alphaproteobacteria</i>      | <i>Proteobacteria</i>    | <i>Bacteria</i> |
| Otu0470 | 0.4                        | 0                              | 0.18               | 0.79                   | 0.18                 | 83.31                 | unclass. <i>Flavobacteriaceae</i>   | <i>Flavobacteriaceae</i>            | <i>Flavobacteriales</i>             | <i>Flavobacteria</i>            | <i>Bacteroidetes</i>     | <i>Bacteria</i> |
| Otu0707 | 0.4                        | 0                              | 0.18               | 0.79                   | 0.18                 | 83.49                 | <i>Haliae</i>                       | <i>Alteromonadaceae</i>             | <i>Alteromonadales</i>              | <i>Gammaproteobacteria</i>      | <i>Proteobacteria</i>    | <i>Bacteria</i> |
| Otu0787 | 0.4                        | 0                              | 0.18               | 0.79                   | 0.18                 | 83.67                 | unclass. <i>Verrucomicrobia</i>     | unclass. <i>Verrucomicrobia</i>     | unclass. <i>Verrucomicrobia</i>     | unclass. <i>Verrucomicrobia</i> | <i>Verrucomicrobia</i>   | <i>Bacteria</i> |
| Otu0819 | 0.4                        | 0                              | 0.18               | 0.79                   | 0.18                 | 83.86                 | unclass. <i>Bacteria</i>            | unclass. <i>Bacteria</i>            | unclass. <i>Bacteria</i>            | unclass. <i>Bacteria</i>        | unclass. <i>Bacteria</i> | <i>Bacteria</i> |
| Otu0072 | 0.35                       | 0                              | 0.17               | 0.49                   | 0.17                 | 84.03                 | <i>Sulfitobacter</i>                | <i>Rhodobacteraceae</i>             | <i>Rhodobacterales</i>              | <i>Alphaproteobacteria</i>      | <i>Proteobacteria</i>    | <i>Bacteria</i> |



| OTU     | Av.A <sub>i</sub><br>(no) | Av.A <sub>i</sub><br>(serial) | Av.δ <sub>i</sub> | Av.δ <sub>i</sub> /SD | Av.δ <sub>i</sub> % | ΣAv.δ <sub>i</sub> % | Genus                               | Family                              | Order                               | Class                           | Phylum                   | Domain          |
|---------|---------------------------|-------------------------------|-------------------|-----------------------|---------------------|----------------------|-------------------------------------|-------------------------------------|-------------------------------------|---------------------------------|--------------------------|-----------------|
| Otu0757 | 0.35                      | 0                             | 0.17              | 0.49                  | 0.17                | 84.2                 | unclass. <i>Gammaproteobacteria</i> | unclass. <i>Gammaproteobacteria</i> | unclass. <i>Gammaproteobacteria</i> | <i>Gammaproteobacteria</i>      | <i>Proteobacteria</i>    | <i>Bacteria</i> |
| Otu0789 | 0.35                      | 0                             | 0.16              | 0.49                  | 0.17                | 84.37                | unclass. <i>Proteobacteria</i>      | unclass. <i>Proteobacteria</i>      | unclass. <i>Proteobacteria</i>      | unclass. <i>Proteobacteria</i>  | <i>Proteobacteria</i>    | <i>Bacteria</i> |
| Otu0031 | 0.35                      | 0                             | 0.16              | 0.49                  | 0.17                | 84.54                | unclass. <i>Gammaproteobacteria</i> | unclass. <i>Gammaproteobacteria</i> | unclass. <i>Gammaproteobacteria</i> | <i>Gammaproteobacteria</i>      | <i>Proteobacteria</i>    | <i>Bacteria</i> |
| Otu0380 | 0.35                      | 0                             | 0.16              | 0.49                  | 0.17                | 84.7                 | unclass. <i>Proteobacteria</i>      | unclass. <i>Proteobacteria</i>      | unclass. <i>Proteobacteria</i>      | unclass. <i>Proteobacteria</i>  | <i>Proteobacteria</i>    | <i>Bacteria</i> |
| Otu0814 | 0.35                      | 0                             | 0.16              | 0.49                  | 0.17                | 84.87                | unclass. <i>Proteobacteria</i>      | unclass. <i>Proteobacteria</i>      | unclass. <i>Proteobacteria</i>      | unclass. <i>Proteobacteria</i>  | <i>Proteobacteria</i>    | <i>Bacteria</i> |
| Otu0009 | 0.2                       | 0.2                           | 0.15              | 0.67                  | 0.15                | 85.02                | unclass. <i>Rhodobacteraceae</i>    | <i>Rhodobacteraceae</i>             | <i>Rhodobacterales</i>              | <i>Alphaproteobacteria</i>      | <i>Proteobacteria</i>    | <i>Bacteria</i> |
| Otu0060 | 0.35                      | 0                             | 0.15              | 0.49                  | 0.15                | 85.17                | unclass. <i>Actinomycetales</i>     | unclass. <i>Actinomycetales</i>     | <i>Actinomycetales</i>              | <i>Actinobacteria</i>           | <i>Actinobacteria</i>    | <i>Bacteria</i> |
| Otu0630 | 0.35                      | 0                             | 0.15              | 0.49                  | 0.15                | 85.32                | unclass. <i>Flavobacteriales</i>    | unclass. <i>Flavobacteriales</i>    | <i>Flavobacteriales</i>             | <i>Flavobacteria</i>            | <i>Bacteroidetes</i>     | <i>Bacteria</i> |
| Otu0555 | 0.2                       | 0.2                           | 0.14              | 0.67                  | 0.15                | 85.46                | <i>Maricaulis</i>                   | <i>Hyphomonadaceae</i>              | <i>Caulobacterales</i>              | <i>Alphaproteobacteria</i>      | <i>Proteobacteria</i>    | <i>Bacteria</i> |
| Otu0017 | 0.28                      | 0                             | 0.14              | 0.49                  | 0.14                | 85.61                | unclass. <i>Flavobacteriales</i>    | unclass. <i>Flavobacteriales</i>    | <i>Flavobacteriales</i>             | <i>Flavobacteria</i>            | <i>Bacteroidetes</i>     | <i>Bacteria</i> |
| Otu0030 | 0.28                      | 0                             | 0.14              | 0.49                  | 0.14                | 85.75                | unclass. <i>Gammaproteobacteria</i> | unclass. <i>Gammaproteobacteria</i> | unclass. <i>Gammaproteobacteria</i> | <i>Gammaproteobacteria</i>      | <i>Proteobacteria</i>    | <i>Bacteria</i> |
| Otu0759 | 0.28                      | 0                             | 0.14              | 0.49                  | 0.14                | 85.89                | unclass. <i>Verrucomicrobiaceae</i> | <i>Verrucomicrobiaceae</i>          | <i>Verrucomicrobiales</i>           | <i>Verrucomicrobiae</i>         | <i>Verrucomicrobia</i>   | <i>Bacteria</i> |
| Otu0075 | 0.28                      | 0                             | 0.13              | 0.49                  | 0.14                | 86.03                | unclass. <i>Alphaproteobacteria</i> | unclass. <i>Alphaproteobacteria</i> | unclass. <i>Alphaproteobacteria</i> | <i>Alphaproteobacteria</i>      | <i>Proteobacteria</i>    | <i>Bacteria</i> |
| Otu0282 | 0.28                      | 0                             | 0.13              | 0.49                  | 0.14                | 86.16                | <i>Haliae</i>                       | <i>Alteromonadaceae</i>             | <i>Alteromonadales</i>              | <i>Gammaproteobacteria</i>      | <i>Proteobacteria</i>    | <i>Bacteria</i> |
| Otu0743 | 0.28                      | 0                             | 0.13              | 0.49                  | 0.14                | 86.3                 | unclass. <i>Verrucomicrobia</i>     | unclass. <i>Verrucomicrobia</i>     | unclass. <i>Verrucomicrobia</i>     | unclass. <i>Verrucomicrobia</i> | <i>Verrucomicrobia</i>   | <i>Bacteria</i> |
| Otu0761 | 0.28                      | 0                             | 0.13              | 0.49                  | 0.14                | 86.43                | unclass. <i>Verrucomicrobiaceae</i> | <i>Verrucomicrobiaceae</i>          | <i>Verrucomicrobiales</i>           | <i>Verrucomicrobiae</i>         | <i>Verrucomicrobia</i>   | <i>Bacteria</i> |
| Otu0810 | 0.28                      | 0                             | 0.13              | 0.49                  | 0.14                | 86.57                | unclass. <i>Gammaproteobacteria</i> | unclass. <i>Gammaproteobacteria</i> | unclass. <i>Gammaproteobacteria</i> | <i>Gammaproteobacteria</i>      | <i>Proteobacteria</i>    | <i>Bacteria</i> |
| Otu0822 | 0.28                      | 0                             | 0.13              | 0.49                  | 0.14                | 86.71                | unclass. <i>Proteobacteria</i>      | unclass. <i>Proteobacteria</i>      | unclass. <i>Proteobacteria</i>      | unclass. <i>Proteobacteria</i>  | <i>Proteobacteria</i>    | <i>Bacteria</i> |
| Otu0827 | 0.28                      | 0                             | 0.13              | 0.49                  | 0.14                | 86.84                | unclass. <i>Bacteria</i>            | unclass. <i>Bacteria</i>            | unclass. <i>Bacteria</i>            | unclass. <i>Bacteria</i>        | unclass. <i>Bacteria</i> | <i>Bacteria</i> |
| Otu0036 | 0                         | 0.28                          | 0.12              | 0.49                  | 0.13                | 86.97                | <i>Glaciecola</i>                   | <i>Alteromonadaceae</i>             | <i>Alteromonadales</i>              | <i>Gammaproteobacteria</i>      | <i>Proteobacteria</i>    | <i>Bacteria</i> |
| Otu0772 | 0.28                      | 0                             | 0.12              | 0.49                  | 0.12                | 87.09                | unclass. <i>Alphaproteobacteria</i> | unclass. <i>Alphaproteobacteria</i> | unclass. <i>Alphaproteobacteria</i> | <i>Alphaproteobacteria</i>      | <i>Proteobacteria</i>    | <i>Bacteria</i> |
| Otu0839 | 0.28                      | 0                             | 0.12              | 0.49                  | 0.12                | 87.21                | unclass. <i>Bacteria</i>            | unclass. <i>Bacteria</i>            | unclass. <i>Bacteria</i>            | unclass. <i>Bacteria</i>        | unclass. <i>Bacteria</i> | <i>Bacteria</i> |
| Otu0167 | 0.2                       | 0                             | 0.1               | 0.49                  | 0.1                 | 87.31                | unclass. <i>Rhodobacteraceae</i>    | <i>Rhodobacteraceae</i>             | <i>Rhodobacterales</i>              | <i>Alphaproteobacteria</i>      | <i>Proteobacteria</i>    | <i>Bacteria</i> |
| Otu0213 | 0.2                       | 0                             | 0.1               | 0.49                  | 0.1                 | 87.42                | unclass. <i>Gammaproteobacteria</i> | unclass. <i>Gammaproteobacteria</i> | unclass. <i>Gammaproteobacteria</i> | <i>Gammaproteobacteria</i>      | <i>Proteobacteria</i>    | <i>Bacteria</i> |
| Otu0290 | 0.2                       | 0                             | 0.1               | 0.49                  | 0.1                 | 87.52                | unclass. <i>Flavobacteriaceae</i>   | <i>Flavobacteriaceae</i>            | <i>Flavobacteriales</i>             | <i>Flavobacteria</i>            | <i>Bacteroidetes</i>     | <i>Bacteria</i> |
| Otu0464 | 0.2                       | 0                             | 0.1               | 0.49                  | 0.1                 | 87.62                | unclass. <i>Bacteroidetes</i>       | unclass. <i>Bacteroidetes</i>       | unclass. <i>Bacteroidetes</i>       | unclass. <i>Bacteroidetes</i>   | <i>Bacteroidetes</i>     | <i>Bacteria</i> |
| Otu0482 | 0.2                       | 0                             | 0.1               | 0.49                  | 0.1                 | 87.72                | unclass. <i>Microbacteriaceae</i>   | <i>Microbacteriaceae</i>            | <i>Actinomycetales</i>              | <i>Actinobacteria</i>           | <i>Actinobacteria</i>    | <i>Bacteria</i> |

| OTU     | Av. A <sub>i</sub><br>(no) | Av. A <sub>i</sub><br>(serial) | Av. δ <sub>i</sub> | Av. δ <sub>i</sub> /SD | Av. δ <sub>i</sub> % | ΣAv. δ <sub>i</sub> % | Genus                               | Family                              | Order                               | Class                          | Phylum                   | Domain          |
|---------|----------------------------|--------------------------------|--------------------|------------------------|----------------------|-----------------------|-------------------------------------|-------------------------------------|-------------------------------------|--------------------------------|--------------------------|-----------------|
| Otu0594 | 0.2                        | 0                              | 0.1                | 0.49                   | 0.1                  | 87.82                 | unclass. <i>Bacteria</i>            | unclass. <i>Bacteria</i>            | unclass. <i>Bacteria</i>            | unclass. <i>Bacteria</i>       | unclass. <i>Bacteria</i> | <i>Bacteria</i> |
| Otu0666 | 0.2                        | 0                              | 0.1                | 0.49                   | 0.1                  | 87.92                 | unclass. <i>Deltaproteobacteria</i> | unclass. <i>Deltaproteobacteria</i> | unclass. <i>Deltaproteobacteria</i> | <i>Deltaproteobacteria</i>     | <i>Proteobacteria</i>    | <i>Bacteria</i> |
| Otu0702 | 0.2                        | 0                              | 0.1                | 0.49                   | 0.1                  | 88.02                 | unclass. <i>Flavobacteriales</i>    | unclass. <i>Flavobacteriales</i>    | <i>Flavobacteriales</i>             | <i>Flavobacteria</i>           | <i>Bacteroidetes</i>     | <i>Bacteria</i> |
| Otu0709 | 0.2                        | 0                              | 0.1                | 0.49                   | 0.1                  | 88.12                 | unclass. <i>Bacteria</i>            | unclass. <i>Bacteria</i>            | unclass. <i>Bacteria</i>            | unclass. <i>Bacteria</i>       | unclass. <i>Bacteria</i> | <i>Bacteria</i> |
| Otu0712 | 0.2                        | 0                              | 0.1                | 0.49                   | 0.1                  | 88.22                 | unclass. <i>Alphaproteobacteria</i> | unclass. <i>Alphaproteobacteria</i> | unclass. <i>Alphaproteobacteria</i> | <i>Alphaproteobacteria</i>     | <i>Proteobacteria</i>    | <i>Bacteria</i> |
| Otu0719 | 0.2                        | 0                              | 0.1                | 0.49                   | 0.1                  | 88.32                 | unclass. <i>Flavobacteriales</i>    | unclass. <i>Flavobacteriales</i>    | <i>Flavobacteriales</i>             | <i>Flavobacteria</i>           | <i>Bacteroidetes</i>     | <i>Bacteria</i> |
| Otu0722 | 0.2                        | 0                              | 0.1                | 0.49                   | 0.1                  | 88.42                 | unclass. <i>Rhodobacteraceae</i>    | <i>Rhodobacteraceae</i>             | <i>Rhodobacterales</i>              | <i>Alphaproteobacteria</i>     | <i>Proteobacteria</i>    | <i>Bacteria</i> |
| Otu0723 | 0.2                        | 0                              | 0.1                | 0.49                   | 0.1                  | 88.52                 | unclass. <i>Microbacteriaceae</i>   | <i>Microbacteriaceae</i>            | <i>Actinomycetales</i>              | <i>Actinobacteria</i>          | <i>Actinobacteria</i>    | <i>Bacteria</i> |
| Otu0726 | 0.2                        | 0                              | 0.1                | 0.49                   | 0.1                  | 88.63                 | unclass. <i>Bacteroidetes</i>       | unclass. <i>Bacteroidetes</i>       | unclass. <i>Bacteroidetes</i>       | unclass. <i>Bacteroidetes</i>  | <i>Bacteroidetes</i>     | <i>Bacteria</i> |
| Otu0728 | 0.2                        | 0                              | 0.1                | 0.49                   | 0.1                  | 88.73                 | unclass. <i>Gammaproteobacteria</i> | unclass. <i>Gammaproteobacteria</i> | unclass. <i>Gammaproteobacteria</i> | <i>Gammaproteobacteria</i>     | <i>Proteobacteria</i>    | <i>Bacteria</i> |
| Otu0729 | 0.2                        | 0                              | 0.1                | 0.49                   | 0.1                  | 88.83                 | unclass. <i>Bacteroidetes</i>       | unclass. <i>Bacteroidetes</i>       | unclass. <i>Bacteroidetes</i>       | unclass. <i>Bacteroidetes</i>  | <i>Bacteroidetes</i>     | <i>Bacteria</i> |
| Otu0731 | 0.2                        | 0                              | 0.1                | 0.49                   | 0.1                  | 88.93                 | <i>Lentisphaera</i>                 | <i>Lentisphaeraceae</i>             | <i>Lentisphaerales</i>              | <i>Lentisphaeria</i>           | <i>Lentisphaerae</i>     | <i>Bacteria</i> |
| Otu0747 | 0.2                        | 0                              | 0.1                | 0.49                   | 0.1                  | 89.03                 | unclass. <i>Rhodobacteraceae</i>    | <i>Rhodobacteraceae</i>             | <i>Rhodobacterales</i>              | <i>Alphaproteobacteria</i>     | <i>Proteobacteria</i>    | <i>Bacteria</i> |
| Otu0748 | 0.2                        | 0                              | 0.1                | 0.49                   | 0.1                  | 89.13                 | unclass. <i>Proteobacteria</i>      | unclass. <i>Proteobacteria</i>      | unclass. <i>Proteobacteria</i>      | unclass. <i>Proteobacteria</i> | <i>Proteobacteria</i>    | <i>Bacteria</i> |
| Otu0749 | 0.2                        | 0                              | 0.1                | 0.49                   | 0.1                  | 89.23                 | unclass. <i>Gammaproteobacteria</i> | unclass. <i>Gammaproteobacteria</i> | unclass. <i>Gammaproteobacteria</i> | <i>Gammaproteobacteria</i>     | <i>Proteobacteria</i>    | <i>Bacteria</i> |
| Otu0750 | 0.2                        | 0                              | 0.1                | 0.49                   | 0.1                  | 89.33                 | unclass. <i>Gammaproteobacteria</i> | unclass. <i>Gammaproteobacteria</i> | unclass. <i>Gammaproteobacteria</i> | <i>Gammaproteobacteria</i>     | <i>Proteobacteria</i>    | <i>Bacteria</i> |
| Otu0083 | 0.2                        | 0                              | 0.1                | 0.49                   | 0.1                  | 89.43                 | unclass. <i>Rhodobacteraceae</i>    | <i>Rhodobacteraceae</i>             | <i>Rhodobacterales</i>              | <i>Alphaproteobacteria</i>     | <i>Proteobacteria</i>    | <i>Bacteria</i> |
| Otu0165 | 0.2                        | 0                              | 0.1                | 0.49                   | 0.1                  | 89.53                 | <i>Marinomonas</i>                  | <i>Oceanospirillaceae</i>           | <i>Oceanospirillales</i>            | <i>Gammaproteobacteria</i>     | <i>Proteobacteria</i>    | <i>Bacteria</i> |
| Otu0174 | 0.2                        | 0                              | 0.1                | 0.49                   | 0.1                  | 89.63                 | unclass. <i>Flavobacteriaceae</i>   | <i>Flavobacteriaceae</i>            | <i>Flavobacteriales</i>             | <i>Flavobacteria</i>           | <i>Bacteroidetes</i>     | <i>Bacteria</i> |
| Otu0178 | 0.2                        | 0                              | 0.1                | 0.49                   | 0.1                  | 89.73                 | unclass. <i>Actinobacteria</i>      | unclass. <i>Actinobacteria</i>      | unclass. <i>Actinobacteria</i>      | <i>Actinobacteria</i>          | <i>Actinobacteria</i>    | <i>Bacteria</i> |
| Otu0381 | 0.2                        | 0                              | 0.1                | 0.49                   | 0.1                  | 89.83                 | unclass. <i>Chitinophagaceae</i>    | <i>Chitinophagaceae</i>             | <i>Sphingobacteriales</i>           | <i>Sphingobacteria</i>         | <i>Bacteroidetes</i>     | <i>Bacteria</i> |
| Otu0483 | 0.2                        | 0                              | 0.1                | 0.49                   | 0.1                  | 89.93                 | unclass. <i>Flavobacteriaceae</i>   | <i>Flavobacteriaceae</i>            | <i>Flavobacteriales</i>             | <i>Flavobacteria</i>           | <i>Bacteroidetes</i>     | <i>Bacteria</i> |
| Otu0499 | 0.2                        | 0                              | 0.1                | 0.49                   | 0.1                  | 90.03                 | unclass. <i>Flavobacteriaceae</i>   | <i>Flavobacteriaceae</i>            | <i>Flavobacteriales</i>             | <i>Flavobacteria</i>           | <i>Bacteroidetes</i>     | <i>Bacteria</i> |

Autumn pH *in situ* 'no dilution' vs. 'serial dilution' (average dissimilarity: 97.4%)

|         |   |       |      |      |      |       |                                  |                                 |                          |                            |                       |                 |
|---------|---|-------|------|------|------|-------|----------------------------------|---------------------------------|--------------------------|----------------------------|-----------------------|-----------------|
| Otu0132 | 0 | 16.35 | 5.53 | 3.48 | 5.68 | 5.68  | unclass. <i>Alteromonadales</i>  | unclass. <i>Alteromonadales</i> | <i>Alteromonadales</i>   | <i>Gammaproteobacteria</i> | <i>Proteobacteria</i> | <i>Bacteria</i> |
| Otu0106 | 0 | 9.15  | 3.05 | 1.94 | 3.13 | 8.81  | <i>Marinomonas</i>               | <i>Oceanospirillaceae</i>       | <i>Oceanospirillales</i> | <i>Gammaproteobacteria</i> | <i>Proteobacteria</i> | <i>Bacteria</i> |
| Otu0107 | 0 | 7.12  | 2.38 | 3.23 | 2.44 | 11.25 | unclass. <i>Rhodobacteraceae</i> | <i>Rhodobacteraceae</i>         | <i>Rhodobacterales</i>   | <i>Alphaproteobacteria</i> | <i>Proteobacteria</i> | <i>Bacteria</i> |

| OTU     | Av. A <sub>i</sub><br>(no) | Av. A <sub>i</sub><br>(serial) | Av. δ <sub>i</sub> | Av. δ <sub>i</sub> /SD | Av. δ <sub>i</sub> % | ΣAv. δ <sub>i</sub> % | Genus                               | Family                              | Order                               | Class                          | Phylum                   | Domain          |
|---------|----------------------------|--------------------------------|--------------------|------------------------|----------------------|-----------------------|-------------------------------------|-------------------------------------|-------------------------------------|--------------------------------|--------------------------|-----------------|
| Otu1090 | 5.7                        | 0                              | 1.9                | 8.49                   | 1.95                 | 13.21                 | unclass. <i>Bacteria</i>            | unclass. <i>Bacteria</i>            | unclass. <i>Bacteria</i>            | unclass. <i>Bacteria</i>       | unclass. <i>Bacteria</i> | <i>Bacteria</i> |
| Otu0005 | 4.32                       | 0                              | 1.5                | 1.67                   | 1.54                 | 14.75                 | <i>Pelagibacter</i>                 | SAR11-clade                         | <i>Rickettsiales</i>                | <i>Alphaproteobacteria</i>     | <i>Proteobacteria</i>    | <i>Bacteria</i> |
| Otu0068 | 3.94                       | 0                              | 1.33               | 6.39                   | 1.37                 | 16.12                 | <i>Pelagibacter</i>                 | SAR11-clade                         | <i>Rickettsiales</i>                | <i>Alphaproteobacteria</i>     | <i>Proteobacteria</i>    | <i>Bacteria</i> |
| Otu0053 | 3.86                       | 0                              | 1.31               | 5.04                   | 1.34                 | 17.46                 | unclass. <i>Rhodobacteraceae</i>    | <i>Rhodobacteraceae</i>             | <i>Rhodobacterales</i>              | <i>Alphaproteobacteria</i>     | <i>Proteobacteria</i>    | <i>Bacteria</i> |
| Otu1091 | 3.7                        | 0                              | 1.24               | 7.96                   | 1.27                 | 18.73                 | unclass. <i>Flavobacteriaceae</i>   | <i>Flavobacteriaceae</i>            | <i>Flavobacteriales</i>             | <i>Flavobacteria</i>           | <i>Bacteroidetes</i>     | <i>Bacteria</i> |
| Otu0823 | 3.6                        | 0                              | 1.21               | 5.67                   | 1.25                 | 19.98                 | unclass. <i>Legionellaceae</i>      | <i>Legionellaceae</i>               | <i>Legionellales</i>                | <i>Gammaproteobacteria</i>     | <i>Proteobacteria</i>    | <i>Bacteria</i> |
| Otu0272 | 3.28                       | 0                              | 1.11               | 2.58                   | 1.14                 | 21.12                 | unclass. <i>Flavobacteriaceae</i>   | <i>Flavobacteriaceae</i>            | <i>Flavobacteriales</i>             | <i>Flavobacteria</i>           | <i>Bacteroidetes</i>     | <i>Bacteria</i> |
| Otu0714 | 3.04                       | 0                              | 1.03               | 5.86                   | 1.06                 | 22.17                 | unclass. <i>Alphaproteobacteria</i> | unclass. <i>Alphaproteobacteria</i> | unclass. <i>Alphaproteobacteria</i> | <i>Alphaproteobacteria</i>     | <i>Proteobacteria</i>    | <i>Bacteria</i> |
| Otu1093 | 3.01                       | 0                              | 1                  | 4.4                    | 1.02                 | 23.19                 | unclass. <i>Proteobacteria</i>      | unclass. <i>Proteobacteria</i>      | unclass. <i>Proteobacteria</i>      | unclass. <i>Proteobacteria</i> | <i>Proteobacteria</i>    | <i>Bacteria</i> |
| Otu0826 | 2.8                        | 0                              | 0.96               | 3.66                   | 0.98                 | 24.18                 | unclass. <i>Bacteroidetes</i>       | unclass. <i>Bacteroidetes</i>       | unclass. <i>Bacteroidetes</i>       | unclass. <i>Bacteroidetes</i>  | <i>Bacteroidetes</i>     | <i>Bacteria</i> |
| Otu0471 | 0                          | 2.82                           | 0.95               | 3.79                   | 0.98                 | 25.15                 | <i>Oceaniserpentilla</i>            | <i>Oceanospirillaceae</i>           | <i>Oceanospirillales</i>            | <i>Gammaproteobacteria</i>     | <i>Proteobacteria</i>    | <i>Bacteria</i> |
| Otu0681 | 2.85                       | 0                              | 0.94               | 3.26                   | 0.97                 | 26.12                 | unclass. <i>Bacteria</i>            | unclass. <i>Bacteria</i>            | unclass. <i>Bacteria</i>            | unclass. <i>Bacteria</i>       | unclass. <i>Bacteria</i> | <i>Bacteria</i> |
| Otu0692 | 2.7                        | 0                              | 0.91               | 3.74                   | 0.93                 | 27.05                 | unclass. <i>Bacteria</i>            | unclass. <i>Bacteria</i>            | unclass. <i>Bacteria</i>            | unclass. <i>Bacteria</i>       | unclass. <i>Bacteria</i> | <i>Bacteria</i> |
| Otu0052 | 2.7                        | 0                              | 0.91               | 6.27                   | 0.93                 | 27.98                 | unclass. <i>Betaproteobacteria</i>  | unclass. <i>Betaproteobacteria</i>  | unclass. <i>Betaproteobacteria</i>  | <i>Betaproteobacteria</i>      | <i>Proteobacteria</i>    | <i>Bacteria</i> |
| Otu1094 | 2.68                       | 0                              | 0.9                | 12.88                  | 0.93                 | 28.91                 | unclass. <i>Bacteroidetes</i>       | unclass. <i>Bacteroidetes</i>       | unclass. <i>Bacteroidetes</i>       | unclass. <i>Bacteroidetes</i>  | <i>Bacteroidetes</i>     | <i>Bacteria</i> |
| Otu0408 | 2.67                       | 0                              | 0.9                | 26.28                  | 0.92                 | 29.83                 | unclass. <i>Flavobacteriaceae</i>   | <i>Flavobacteriaceae</i>            | <i>Flavobacteriales</i>             | <i>Flavobacteria</i>           | <i>Bacteroidetes</i>     | <i>Bacteria</i> |
| Otu0983 | 2.52                       | 0                              | 0.83               | 4.66                   | 0.86                 | 30.69                 | unclass. <i>Flavobacteriales</i>    | unclass. <i>Flavobacteriales</i>    | <i>Flavobacteriales</i>             | <i>Flavobacteria</i>           | <i>Bacteroidetes</i>     | <i>Bacteria</i> |
| Otu0469 | 2.44                       | 0                              | 0.82               | 4.57                   | 0.84                 | 31.53                 | unclass. <i>Bacteria</i>            | unclass. <i>Bacteria</i>            | unclass. <i>Bacteria</i>            | unclass. <i>Bacteria</i>       | unclass. <i>Bacteria</i> | <i>Bacteria</i> |
| Otu1023 | 2.35                       | 0                              | 0.79               | 6.93                   | 0.82                 | 32.35                 | unclass. <i>Lentisphaeria</i>       | unclass. <i>Lentisphaeria</i>       | unclass. <i>Lentisphaeria</i>       | <i>Lentisphaeria</i>           | <i>Lentisphaerae</i>     | <i>Bacteria</i> |
| Otu0001 | 4.28                       | 3.02                           | 0.78               | 1.12                   | 0.8                  | 33.15                 | unclass. <i>Flavobacteriaceae</i>   | <i>Flavobacteriaceae</i>            | <i>Flavobacteriales</i>             | <i>Flavobacteria</i>           | <i>Bacteroidetes</i>     | <i>Bacteria</i> |
| Otu0467 | 2.24                       | 0                              | 0.77               | 2.48                   | 0.79                 | 33.94                 | unclass. <i>Rhodospirillaceae</i>   | <i>Rhodospirillaceae</i>            | <i>Rhodospirillales</i>             | <i>Alphaproteobacteria</i>     | <i>Proteobacteria</i>    | <i>Bacteria</i> |
| Otu0705 | 2.29                       | 0                              | 0.74               | 1.72                   | 0.76                 | 34.7                  | <i>Planctomyces</i>                 | <i>Planctomycetaceae</i>            | <i>Planctomycetales</i>             | <i>Planctomycetacia</i>        | <i>Planctomycetes</i>    | <i>Bacteria</i> |
| Otu0764 | 2.18                       | 0                              | 0.73               | 10.28                  | 0.75                 | 35.45                 | unclass. <i>Proteobacteria</i>      | unclass. <i>Proteobacteria</i>      | unclass. <i>Proteobacteria</i>      | unclass. <i>Proteobacteria</i> | <i>Proteobacteria</i>    | <i>Bacteria</i> |
| Otu0123 | 0.2                        | 2.23                           | 0.72               | 1.64                   | 0.74                 | 36.19                 | unclass. <i>Gammaproteobacteria</i> | unclass. <i>Gammaproteobacteria</i> | unclass. <i>Gammaproteobacteria</i> | <i>Gammaproteobacteria</i>     | <i>Proteobacteria</i>    | <i>Bacteria</i> |
| Otu0494 | 2.08                       | 0                              | 0.69               | 2.59                   | 0.71                 | 36.89                 | unclass. <i>Flavobacteriaceae</i>   | <i>Flavobacteriaceae</i>            | <i>Flavobacteriales</i>             | <i>Flavobacteria</i>           | <i>Bacteroidetes</i>     | <i>Bacteria</i> |
| Otu0551 | 0                          | 2                              | 0.67               | 1.67                   | 0.69                 | 37.58                 | <i>Arcobacter</i>                   | <i>Campylobacteraceae</i>           | <i>Campylobacterales</i>            | <i>Epsilonproteobacteria</i>   | <i>Proteobacteria</i>    | <i>Bacteria</i> |
| Otu0691 | 1.94                       | 0                              | 0.66               | 6.52                   | 0.67                 | 38.25                 | <i>Planctomyces</i>                 | <i>Planctomycetaceae</i>            | <i>Planctomycetales</i>             | <i>Planctomycetacia</i>        | <i>Planctomycetes</i>    | <i>Bacteria</i> |

| OTU     | Av.A <sub>i</sub><br>(no) | Av.A <sub>i</sub><br>(serial) | Av.δ <sub>i</sub> | Av.δ <sub>i</sub> /SD | Av.δ <sub>i</sub> % | ΣAv.δ <sub>i</sub> % | Genus                               | Family                              | Order                               | Class                          | Phylum                   | Domain          |
|---------|---------------------------|-------------------------------|-------------------|-----------------------|---------------------|----------------------|-------------------------------------|-------------------------------------|-------------------------------------|--------------------------------|--------------------------|-----------------|
| Otu0473 | 1.92                      | 0                             | 0.65              | 4.9                   | 0.67                | 38.92                | unclass. <i>Alphaproteobacteria</i> | unclass. <i>Alphaproteobacteria</i> | unclass. <i>Alphaproteobacteria</i> | <i>Alphaproteobacteria</i>     | <i>Proteobacteria</i>    | <i>Bacteria</i> |
| Otu0490 | 1.94                      | 0                             | 0.65              | 11.6                  | 0.67                | 39.59                | unclass. <i>Burkholderiales</i>     | unclass. <i>Burkholderiales</i>     | <i>Burkholderiales</i>              | <i>Betaproteobacteria</i>      | <i>Proteobacteria</i>    | <i>Bacteria</i> |
| Otu0036 | 0.2                       | 2.12                          | 0.65              | 1.54                  | 0.67                | 40.26                | <i>Glaciecola</i>                   | <i>Alteromonadaceae</i>             | <i>Alteromonadales</i>              | <i>Gammaproteobacteria</i>     | <i>Proteobacteria</i>    | <i>Bacteria</i> |
| Otu1092 | 1.84                      | 0                             | 0.61              | 1.17                  | 0.63                | 40.88                | <i>Cycloclasticus</i>               | <i>Piscirickettsiaceae</i>          | <i>Thiotrichales</i>                | <i>Gammaproteobacteria</i>     | <i>Proteobacteria</i>    | <i>Bacteria</i> |
| Otu0596 | 1.79                      | 0                             | 0.6               | 3.62                  | 0.62                | 41.5                 | <i>Neptunomonas</i>                 | <i>Oceanospirillaceae</i>           | <i>Oceanospirillales</i>            | <i>Gammaproteobacteria</i>     | <i>Proteobacteria</i>    | <i>Bacteria</i> |
| Otu1097 | 1.77                      | 0                             | 0.6               | 5.05                  | 0.61                | 42.11                | unclass. <i>Proteobacteria</i>      | unclass. <i>Proteobacteria</i>      | unclass. <i>Proteobacteria</i>      | unclass. <i>Proteobacteria</i> | <i>Proteobacteria</i>    | <i>Bacteria</i> |
| Otu0776 | 1.76                      | 0                             | 0.58              | 3.32                  | 0.6                 | 42.71                | unclass. <i>Proteobacteria</i>      | unclass. <i>Proteobacteria</i>      | unclass. <i>Proteobacteria</i>      | unclass. <i>Proteobacteria</i> | <i>Proteobacteria</i>    | <i>Bacteria</i> |
| Otu0048 | 1.71                      | 0                             | 0.58              | 4.78                  | 0.59                | 43.3                 | unclass. <i>Flavobacteriaceae</i>   | <i>Flavobacteriaceae</i>            | <i>Flavobacteriales</i>             | <i>Flavobacteria</i>           | <i>Bacteroidetes</i>     | <i>Bacteria</i> |
| Otu1081 | 1.66                      | 0                             | 0.54              | 2.27                  | 0.56                | 43.86                | unclass. <i>Flavobacteriales</i>    | unclass. <i>Flavobacteriales</i>    | <i>Flavobacteriales</i>             | <i>Flavobacteria</i>           | <i>Bacteroidetes</i>     | <i>Bacteria</i> |
| Otu0541 | 1.6                       | 0                             | 0.54              | 8.95                  | 0.55                | 44.42                | unclass. <i>Rhodobacteraceae</i>    | <i>Rhodobacteraceae</i>             | <i>Rhodobacterales</i>              | <i>Alphaproteobacteria</i>     | <i>Proteobacteria</i>    | <i>Bacteria</i> |
| Otu0281 | 1.52                      | 0                             | 0.51              | 5.84                  | 0.52                | 44.94                | unclass. <i>Flavobacteriales</i>    | unclass. <i>Flavobacteriales</i>    | <i>Flavobacteriales</i>             | <i>Flavobacteria</i>           | <i>Bacteroidetes</i>     | <i>Bacteria</i> |
| Otu0771 | 1.48                      | 0                             | 0.51              | 2.78                  | 0.52                | 45.46                | unclass. <i>Rhodobacteraceae</i>    | <i>Rhodobacteraceae</i>             | <i>Rhodobacterales</i>              | <i>Alphaproteobacteria</i>     | <i>Proteobacteria</i>    | <i>Bacteria</i> |
| Otu0972 | 1.48                      | 0                             | 0.49              | 3.63                  | 0.51                | 45.96                | <i>Nisaea</i>                       | <i>Rhodospirillaceae</i>            | <i>Rhodospirillales</i>             | <i>Alphaproteobacteria</i>     | <i>Proteobacteria</i>    | <i>Bacteria</i> |
| Otu0696 | 1.48                      | 0                             | 0.48              | 1.9                   | 0.49                | 46.46                | unclass. <i>Flavobacteriaceae</i>   | <i>Flavobacteriaceae</i>            | <i>Flavobacteriales</i>             | <i>Flavobacteria</i>           | <i>Bacteroidetes</i>     | <i>Bacteria</i> |
| Otu0694 | 1.41                      | 0                             | 0.48              | 2.94                  | 0.49                | 46.95                | unclass. <i>Alphaproteobacteria</i> | unclass. <i>Alphaproteobacteria</i> | unclass. <i>Alphaproteobacteria</i> | <i>Alphaproteobacteria</i>     | <i>Proteobacteria</i>    | <i>Bacteria</i> |
| Otu0509 | 1.39                      | 0                             | 0.47              | 4.65                  | 0.48                | 47.43                | unclass. <i>Gammaproteobacteria</i> | unclass. <i>Gammaproteobacteria</i> | unclass. <i>Gammaproteobacteria</i> | <i>Gammaproteobacteria</i>     | <i>Proteobacteria</i>    | <i>Bacteria</i> |
| Otu0546 | 0                         | 1.37                          | 0.46              | 1.36                  | 0.47                | 47.9                 | unclass. <i>Bacteria</i>            | unclass. <i>Bacteria</i>            | unclass. <i>Bacteria</i>            | unclass. <i>Bacteria</i>       | unclass. <i>Bacteria</i> | <i>Bacteria</i> |
| Otu1105 | 1.37                      | 0                             | 0.45              | 4.45                  | 0.47                | 48.37                | unclass. <i>Proteobacteria</i>      | unclass. <i>Proteobacteria</i>      | unclass. <i>Proteobacteria</i>      | unclass. <i>Proteobacteria</i> | <i>Proteobacteria</i>    | <i>Bacteria</i> |
| Otu0521 | 1.49                      | 0.4                           | 0.43              | 1.3                   | 0.45                | 48.81                | unclass. <i>Rhodobacteraceae</i>    | <i>Rhodobacteraceae</i>             | <i>Rhodobacterales</i>              | <i>Alphaproteobacteria</i>     | <i>Proteobacteria</i>    | <i>Bacteria</i> |
| Otu0695 | 1.29                      | 0                             | 0.43              | 4.41                  | 0.44                | 49.25                | unclass. <i>Proteobacteria</i>      | unclass. <i>Proteobacteria</i>      | unclass. <i>Proteobacteria</i>      | unclass. <i>Proteobacteria</i> | <i>Proteobacteria</i>    | <i>Bacteria</i> |
| Otu0710 | 1.24                      | 0                             | 0.43              | 1.18                  | 0.44                | 49.69                | unclass. <i>Gammaproteobacteria</i> | unclass. <i>Gammaproteobacteria</i> | unclass. <i>Gammaproteobacteria</i> | <i>Gammaproteobacteria</i>     | <i>Proteobacteria</i>    | <i>Bacteria</i> |
| Otu0485 | 1.26                      | 0                             | 0.42              | 1.94                  | 0.43                | 50.12                | unclass. <i>Alphaproteobacteria</i> | unclass. <i>Alphaproteobacteria</i> | unclass. <i>Alphaproteobacteria</i> | <i>Alphaproteobacteria</i>     | <i>Proteobacteria</i>    | <i>Bacteria</i> |
| Otu0084 | 1.23                      | 0                             | 0.41              | 4.57                  | 0.42                | 50.54                | unclass. <i>Gammaproteobacteria</i> | unclass. <i>Gammaproteobacteria</i> | unclass. <i>Gammaproteobacteria</i> | <i>Gammaproteobacteria</i>     | <i>Proteobacteria</i>    | <i>Bacteria</i> |
| Otu0960 | 1.23                      | 0                             | 0.4               | 1.72                  | 0.41                | 50.95                | unclass. <i>Bacteria</i>            | unclass. <i>Bacteria</i>            | unclass. <i>Bacteria</i>            | unclass. <i>Bacteria</i>       | unclass. <i>Bacteria</i> | <i>Bacteria</i> |
| Otu1096 | 1.18                      | 0                             | 0.4               | 1.85                  | 0.41                | 51.36                | unclass. <i>Lentisphaeria</i>       | unclass. <i>Lentisphaeria</i>       | unclass. <i>Lentisphaeria</i>       | <i>Lentisphaeria</i>           | <i>Lentisphaerae</i>     | <i>Bacteria</i> |
| Otu0898 | 1.13                      | 0                             | 0.4               | 1.43                  | 0.41                | 51.77                | <i>Sphingopyxis</i>                 | <i>Sphingomonadaceae</i>            | <i>Sphingomonadales</i>             | <i>Alphaproteobacteria</i>     | <i>Proteobacteria</i>    | <i>Bacteria</i> |
| Otu0261 | 1.17                      | 0                             | 0.39              | 1.79                  | 0.4                 | 52.17                | <i>Winogradskyella</i>              | <i>Flavobacteriaceae</i>            | <i>Flavobacteriales</i>             | <i>Flavobacteria</i>           | <i>Bacteroidetes</i>     | <i>Bacteria</i> |

| OTU     | Av.A <sub>i</sub><br>(no) | Av.A <sub>i</sub><br>(serial) | Av.δ <sub>i</sub> | Av.δ <sub>i</sub> /SD | Av.δ <sub>i</sub> % | ΣAv.δ <sub>i</sub> % | Genus                               | Family                              | Order                               | Class                          | Phylum                   | Domain          |
|---------|---------------------------|-------------------------------|-------------------|-----------------------|---------------------|----------------------|-------------------------------------|-------------------------------------|-------------------------------------|--------------------------------|--------------------------|-----------------|
| Otu1115 | 1.17                      | 0                             | 0.39              | 1.64                  | 0.4                 | 52.56                | <i>Marinobacter</i>                 | <i>Alteromonadaceae</i>             | <i>Alteromonadales</i>              | <i>Gammaproteobacteria</i>     | <i>Proteobacteria</i>    | <i>Bacteria</i> |
| Otu0778 | 1.17                      | 0                             | 0.38              | 1.76                  | 0.39                | 52.95                | unclass. <i>Gammaproteobacteria</i> | unclass. <i>Gammaproteobacteria</i> | unclass. <i>Gammaproteobacteria</i> | <i>Gammaproteobacteria</i>     | <i>Proteobacteria</i>    | <i>Bacteria</i> |
| Otu0157 | 1.04                      | 0                             | 0.37              | 1.03                  | 0.38                | 53.33                | unclass. <i>Gammaproteobacteria</i> | unclass. <i>Gammaproteobacteria</i> | unclass. <i>Gammaproteobacteria</i> | <i>Gammaproteobacteria</i>     | <i>Proteobacteria</i>    | <i>Bacteria</i> |
| Otu1100 | 1.09                      | 0                             | 0.37              | 1.68                  | 0.38                | 53.71                | unclass. <i>Planctomycetaceae</i>   | <i>Planctomycetaceae</i>            | <i>Planctomycetales</i>             | <i>Planctomycetacia</i>        | <i>Planctomycetes</i>    | <i>Bacteria</i> |
| Otu1113 | 1.11                      | 0                             | 0.36              | 1.79                  | 0.37                | 54.08                | unclass. <i>Gammaproteobacteria</i> | unclass. <i>Gammaproteobacteria</i> | unclass. <i>Gammaproteobacteria</i> | <i>Gammaproteobacteria</i>     | <i>Proteobacteria</i>    | <i>Bacteria</i> |
| Otu0737 | 1.08                      | 0                             | 0.36              | 8.36                  | 0.37                | 54.45                | unclass. <i>Gammaproteobacteria</i> | unclass. <i>Gammaproteobacteria</i> | unclass. <i>Gammaproteobacteria</i> | <i>Gammaproteobacteria</i>     | <i>Proteobacteria</i>    | <i>Bacteria</i> |
| Otu1125 | 1.11                      | 0                             | 0.36              | 1.83                  | 0.37                | 54.82                | <i>Planctomyces</i>                 | <i>Planctomycetaceae</i>            | <i>Planctomycetales</i>             | <i>Planctomycetacia</i>        | <i>Planctomycetes</i>    | <i>Bacteria</i> |
| Otu0840 | 1.01                      | 0                             | 0.34              | 0.8                   | 0.35                | 55.18                | unclass. <i>Flavobacteriaceae</i>   | <i>Flavobacteriaceae</i>            | <i>Flavobacteriales</i>             | <i>Flavobacteria</i>           | <i>Bacteroidetes</i>     | <i>Bacteria</i> |
| Otu1102 | 0.93                      | 0                             | 0.33              | 0.77                  | 0.33                | 55.51                | unclass. <i>Proteobacteria</i>      | unclass. <i>Proteobacteria</i>      | unclass. <i>Proteobacteria</i>      | unclass. <i>Proteobacteria</i> | <i>Proteobacteria</i>    | <i>Bacteria</i> |
| Otu0255 | 0.97                      | 0                             | 0.32              | 1.81                  | 0.32                | 55.83                | <i>Sphingopyxis</i>                 | <i>Sphingomonadaceae</i>            | <i>Sphingomonadales</i>             | <i>Alphaproteobacteria</i>     | <i>Proteobacteria</i>    | <i>Bacteria</i> |
| Otu0645 | 0.97                      | 0                             | 0.31              | 1.17                  | 0.31                | 56.15                | <i>Arcobacter</i>                   | <i>Campylobacteraceae</i>           | <i>Campylobacterales</i>            | <i>Epsilonproteobacteria</i>   | <i>Proteobacteria</i>    | <i>Bacteria</i> |
| Otu0682 | 0.89                      | 0                             | 0.3               | 1.15                  | 0.31                | 56.46                | unclass. <i>Oceanospirillaceae</i>  | <i>Oceanospirillaceae</i>           | <i>Oceanospirillales</i>            | <i>Gammaproteobacteria</i>     | <i>Proteobacteria</i>    | <i>Bacteria</i> |
| Otu1111 | 0.88                      | 0                             | 0.3               | 1.86                  | 0.31                | 56.77                | unclass. <i>Proteobacteria</i>      | unclass. <i>Proteobacteria</i>      | unclass. <i>Proteobacteria</i>      | unclass. <i>Proteobacteria</i> | <i>Proteobacteria</i>    | <i>Bacteria</i> |
| Otu0186 | 0.85                      | 0                             | 0.3               | 1.19                  | 0.3                 | 57.07                | unclass. <i>Planctomycetaceae</i>   | <i>Planctomycetaceae</i>            | <i>Planctomycetales</i>             | <i>Planctomycetacia</i>        | <i>Planctomycetes</i>    | <i>Bacteria</i> |
| Otu1217 | 0.85                      | 0                             | 0.29              | 0.75                  | 0.3                 | 57.38                | unclass. <i>Alteromonadales</i>     | unclass. <i>Alteromonadales</i>     | <i>Alteromonadales</i>              | <i>Gammaproteobacteria</i>     | <i>Proteobacteria</i>    | <i>Bacteria</i> |
| Otu0202 | 0.88                      | 0                             | 0.29              | 1.77                  | 0.3                 | 57.67                | unclass. <i>Alteromonadaceae</i>    | <i>Alteromonadaceae</i>             | <i>Alteromonadales</i>              | <i>Gammaproteobacteria</i>     | <i>Proteobacteria</i>    | <i>Bacteria</i> |
| Otu0959 | 0.88                      | 0                             | 0.29              | 1.77                  | 0.3                 | 57.97                | unclass. <i>Rhodobacteraceae</i>    | <i>Rhodobacteraceae</i>             | <i>Rhodobacterales</i>              | <i>Alphaproteobacteria</i>     | <i>Proteobacteria</i>    | <i>Bacteria</i> |
| Otu0137 | 0.88                      | 0                             | 0.29              | 1.85                  | 0.3                 | 58.27                | unclass. <i>Bacteroidetes</i>       | unclass. <i>Bacteroidetes</i>       | unclass. <i>Bacteroidetes</i>       | unclass. <i>Bacteroidetes</i>  | <i>Bacteroidetes</i>     | <i>Bacteria</i> |
| Otu0611 | 0.83                      | 0                             | 0.29              | 1.11                  | 0.29                | 58.56                | unclass. <i>Bacteroidetes</i>       | unclass. <i>Bacteroidetes</i>       | unclass. <i>Bacteroidetes</i>       | unclass. <i>Bacteroidetes</i>  | <i>Bacteroidetes</i>     | <i>Bacteria</i> |
| Otu0846 | 0.83                      | 0                             | 0.29              | 1.15                  | 0.29                | 58.86                | unclass. <i>Nannocystaceae</i>      | <i>Nannocystaceae</i>               | <i>Myxococcales</i>                 | <i>Deltaproteobacteria</i>     | <i>Proteobacteria</i>    | <i>Bacteria</i> |
| Otu0844 | 0.85                      | 0                             | 0.28              | 1.03                  | 0.29                | 59.14                | unclass. <i>Flavobacteriaceae</i>   | <i>Flavobacteriaceae</i>            | <i>Flavobacteriales</i>             | <i>Flavobacteria</i>           | <i>Bacteroidetes</i>     | <i>Bacteria</i> |
| Otu1219 | 0.88                      | 0                             | 0.28              | 0.78                  | 0.29                | 59.43                | unclass. <i>Bacteria</i>            | unclass. <i>Bacteria</i>            | unclass. <i>Bacteria</i>            | unclass. <i>Bacteria</i>       | unclass. <i>Bacteria</i> | <i>Bacteria</i> |
| Otu0601 | 0.8                       | 0                             | 0.27              | 1.93                  | 0.28                | 59.7                 | unclass. <i>Flammeovirgaceae</i>    | <i>Flammeovirgaceae</i>             | <i>Sphingobacteriales</i>           | <i>Sphingobacteria</i>         | <i>Bacteroidetes</i>     | <i>Bacteria</i> |
| Otu0817 | 0.8                       | 0                             | 0.27              | 1.93                  | 0.28                | 59.98                | unclass. <i>Bacteroidetes</i>       | unclass. <i>Bacteroidetes</i>       | unclass. <i>Bacteroidetes</i>       | unclass. <i>Bacteroidetes</i>  | <i>Bacteroidetes</i>     | <i>Bacteria</i> |
| Otu0502 | 0.83                      | 0                             | 0.27              | 1.16                  | 0.28                | 60.26                | unclass. <i>Gammaproteobacteria</i> | unclass. <i>Gammaproteobacteria</i> | unclass. <i>Gammaproteobacteria</i> | <i>Gammaproteobacteria</i>     | <i>Proteobacteria</i>    | <i>Bacteria</i> |
| Otu0170 | 0.8                       | 0                             | 0.27              | 1.93                  | 0.27                | 60.53                | unclass. <i>Bacteria</i>            | unclass. <i>Bacteria</i>            | unclass. <i>Bacteria</i>            | unclass. <i>Bacteria</i>       | unclass. <i>Bacteria</i> | <i>Bacteria</i> |
| Otu0947 | 0.8                       | 0                             | 0.26              | 0.49                  | 0.27                | 60.81                | unclass. <i>Bacteroidetes</i>       | unclass. <i>Bacteroidetes</i>       | unclass. <i>Bacteroidetes</i>       | unclass. <i>Bacteroidetes</i>  | <i>Bacteroidetes</i>     | <i>Bacteria</i> |

| OTU     | Av.A <sub>i</sub><br>(no) | Av.A <sub>i</sub><br>(serial) | Av.δ <sub>i</sub> | Av.δ <sub>i</sub> /SD | Av.δ <sub>i</sub> % | ΣAv.δ <sub>i</sub> % | Genus                               | Family                              | Order                               | Class                          | Phylum                   | Domain          |
|---------|---------------------------|-------------------------------|-------------------|-----------------------|---------------------|----------------------|-------------------------------------|-------------------------------------|-------------------------------------|--------------------------------|--------------------------|-----------------|
| Otu0243 | 0.77                      | 0                             | 0.26              | 1.14                  | 0.27                | 61.08                | unclass. <i>Gammaproteobacteria</i> | unclass. <i>Gammaproteobacteria</i> | unclass. <i>Gammaproteobacteria</i> | <i>Gammaproteobacteria</i>     | <i>Proteobacteria</i>    | <i>Bacteria</i> |
| Otu0621 | 1.15                      | 0.6                           | 0.26              | 1.21                  | 0.27                | 61.34                | <i>Colwellia</i>                    | <i>Colwelliaceae</i>                | <i>Alteromonadales</i>              | <i>Gammaproteobacteria</i>     | <i>Proteobacteria</i>    | <i>Bacteria</i> |
| Otu0375 | 0.75                      | 0                             | 0.26              | 1.09                  | 0.27                | 61.61                | unclass. <i>Bacteroidetes</i>       | unclass. <i>Bacteroidetes</i>       | unclass. <i>Bacteroidetes</i>       | unclass. <i>Bacteroidetes</i>  | <i>Bacteroidetes</i>     | <i>Bacteria</i> |
| Otu0986 | 0.75                      | 0                             | 0.26              | 1.04                  | 0.26                | 61.87                | unclass. <i>Planctomycetaceae</i>   | <i>Planctomycetaceae</i>            | <i>Planctomycetales</i>             | <i>Planctomycetacia</i>        | <i>Planctomycetes</i>    | <i>Bacteria</i> |
| Otu1118 | 0.77                      | 0                             | 0.26              | 1.19                  | 0.26                | 62.14                | unclass. <i>Oceanospirillales</i>   | unclass. <i>Oceanospirillales</i>   | <i>Oceanospirillales</i>            | <i>Gammaproteobacteria</i>     | <i>Proteobacteria</i>    | <i>Bacteria</i> |
| Otu0742 | 0.77                      | 0                             | 0.25              | 1.19                  | 0.26                | 62.4                 | unclass. <i>Rhodobacteraceae</i>    | <i>Rhodobacteraceae</i>             | <i>Rhodobacterales</i>              | <i>Alphaproteobacteria</i>     | <i>Proteobacteria</i>    | <i>Bacteria</i> |
| Otu0191 | 0.68                      | 0                             | 0.25              | 0.79                  | 0.25                | 62.65                | unclass. <i>Proteobacteria</i>      | unclass. <i>Proteobacteria</i>      | unclass. <i>Proteobacteria</i>      | unclass. <i>Proteobacteria</i> | <i>Proteobacteria</i>    | <i>Bacteria</i> |
| Otu1099 | 0.77                      | 0                             | 0.25              | 1.16                  | 0.25                | 62.9                 | unclass. <i>Lentisphaeria</i>       | unclass. <i>Lentisphaeria</i>       | unclass. <i>Lentisphaeria</i>       | <i>Lentisphaeria</i>           | <i>Lentisphaerae</i>     | <i>Bacteria</i> |
| Otu1109 | 0.77                      | 0                             | 0.24              | 1.17                  | 0.25                | 63.15                | unclass. <i>Saprospiraceae</i>      | <i>Saprospiraceae</i>               | <i>Sphingobacteriales</i>           | <i>Sphingobacteria</i>         | <i>Bacteroidetes</i>     | <i>Bacteria</i> |
| Otu0765 | 0.68                      | 0                             | 0.24              | 1.15                  | 0.24                | 63.39                | <i>Pelagicoccus</i>                 | <i>Puniceococcaceae</i>             | <i>Puniceococcales</i>              | <i>Opitutae</i>                | <i>Verrucomicrobia</i>   | <i>Bacteria</i> |
| Otu1110 | 0.68                      | 0                             | 0.24              | 1.15                  | 0.24                | 63.64                | unclass. <i>Alphaproteobacteria</i> | unclass. <i>Alphaproteobacteria</i> | unclass. <i>Alphaproteobacteria</i> | <i>Alphaproteobacteria</i>     | <i>Proteobacteria</i>    | <i>Bacteria</i> |
| Otu1281 | 0.63                      | 0                             | 0.24              | 0.49                  | 0.24                | 63.88                | unclass. <i>Proteobacteria</i>      | unclass. <i>Proteobacteria</i>      | unclass. <i>Proteobacteria</i>      | unclass. <i>Proteobacteria</i> | <i>Proteobacteria</i>    | <i>Bacteria</i> |
| Otu0284 | 0.68                      | 0                             | 0.24              | 1.18                  | 0.24                | 64.12                | unclass. <i>Saprospiraceae</i>      | <i>Saprospiraceae</i>               | <i>Sphingobacteriales</i>           | <i>Sphingobacteria</i>         | <i>Bacteroidetes</i>     | <i>Bacteria</i> |
| Otu1107 | 0.68                      | 0                             | 0.23              | 1.18                  | 0.24                | 64.36                | unclass. <i>Planctomycetaceae</i>   | <i>Planctomycetaceae</i>            | <i>Planctomycetales</i>             | <i>Planctomycetacia</i>        | <i>Planctomycetes</i>    | <i>Bacteria</i> |
| Otu0758 | 0.69                      | 0                             | 0.23              | 0.8                   | 0.23                | 64.6                 | unclass. <i>Bacteria</i>            | unclass. <i>Bacteria</i>            | unclass. <i>Bacteria</i>            | unclass. <i>Bacteria</i>       | unclass. <i>Bacteria</i> | <i>Bacteria</i> |
| Otu1186 | 0.68                      | 0                             | 0.23              | 1.13                  | 0.23                | 64.83                | unclass. <i>Bacteria</i>            | unclass. <i>Bacteria</i>            | unclass. <i>Bacteria</i>            | unclass. <i>Bacteria</i>       | unclass. <i>Bacteria</i> | <i>Bacteria</i> |
| Otu1101 | 0.68                      | 0                             | 0.23              | 1.17                  | 0.23                | 65.06                | <i>Porphyrobacter</i>               | <i>Erythrobacteraceae</i>           | <i>Sphingomonadales</i>             | <i>Alphaproteobacteria</i>     | <i>Proteobacteria</i>    | <i>Bacteria</i> |
| Otu0503 | 0.68                      | 0                             | 0.23              | 1.18                  | 0.23                | 65.29                | unclass. <i>Bacteroidetes</i>       | unclass. <i>Bacteroidetes</i>       | unclass. <i>Bacteroidetes</i>       | unclass. <i>Bacteroidetes</i>  | <i>Bacteroidetes</i>     | <i>Bacteria</i> |
| Otu0483 | 0.68                      | 0                             | 0.22              | 1.13                  | 0.23                | 65.52                | unclass. <i>Flavobacteriaceae</i>   | <i>Flavobacteriaceae</i>            | <i>Flavobacteriales</i>             | <i>Flavobacteria</i>           | <i>Bacteroidetes</i>     | <i>Bacteria</i> |
| Otu1119 | 0.68                      | 0                             | 0.22              | 1.17                  | 0.22                | 65.75                | unclass. <i>Bacteroidetes</i>       | unclass. <i>Bacteroidetes</i>       | unclass. <i>Bacteroidetes</i>       | unclass. <i>Bacteroidetes</i>  | <i>Bacteroidetes</i>     | <i>Bacteria</i> |
| Otu0075 | 0.63                      | 0                             | 0.21              | 0.8                   | 0.22                | 65.96                | unclass. <i>Alphaproteobacteria</i> | unclass. <i>Alphaproteobacteria</i> | unclass. <i>Alphaproteobacteria</i> | <i>Alphaproteobacteria</i>     | <i>Proteobacteria</i>    | <i>Bacteria</i> |
| Otu0044 | 0.6                       | 0                             | 0.21              | 1.2                   | 0.22                | 66.18                | unclass. <i>Gammaproteobacteria</i> | unclass. <i>Gammaproteobacteria</i> | unclass. <i>Gammaproteobacteria</i> | <i>Gammaproteobacteria</i>     | <i>Proteobacteria</i>    | <i>Bacteria</i> |
| Otu0504 | 0.6                       | 0                             | 0.2               | 1.19                  | 0.21                | 66.39                | unclass. <i>Alphaproteobacteria</i> | unclass. <i>Alphaproteobacteria</i> | unclass. <i>Alphaproteobacteria</i> | <i>Alphaproteobacteria</i>     | <i>Proteobacteria</i>    | <i>Bacteria</i> |
| Otu0703 | 0.63                      | 0                             | 0.2               | 0.79                  | 0.21                | 66.6                 | unclass. <i>Gammaproteobacteria</i> | unclass. <i>Gammaproteobacteria</i> | unclass. <i>Gammaproteobacteria</i> | <i>Gammaproteobacteria</i>     | <i>Proteobacteria</i>    | <i>Bacteria</i> |
| Otu1095 | 0.6                       | 0                             | 0.2               | 0.75                  | 0.2                 | 66.8                 | unclass. <i>Bacteria</i>            | unclass. <i>Bacteria</i>            | unclass. <i>Bacteria</i>            | unclass. <i>Bacteria</i>       | unclass. <i>Bacteria</i> | <i>Bacteria</i> |
| Otu0571 | 0                         | 0.6                           | 0.2               | 0.73                  | 0.2                 | 67.01                | <i>Marinomonas</i>                  | <i>Oceanospirillaceae</i>           | <i>Oceanospirillales</i>            | <i>Gammaproteobacteria</i>     | <i>Proteobacteria</i>    | <i>Bacteria</i> |
| Otu0677 | 0.6                       | 0                             | 0.2               | 0.73                  | 0.2                 | 67.21                | <i>Thalassobius</i>                 | <i>Rhodobacteraceae</i>             | <i>Rhodobacterales</i>              | <i>Alphaproteobacteria</i>     | <i>Proteobacteria</i>    | <i>Bacteria</i> |

| OTU     | Av.A <sub>i</sub><br>(no) | Av.A <sub>i</sub><br>(serial) | Av.δ <sub>i</sub> | Av.δ <sub>i</sub> /SD | Av.δ <sub>i</sub> % | ΣAv.δ <sub>i</sub> % | Genus                               | Family                              | Order                               | Class                          | Phylum                   | Domain          |
|---------|---------------------------|-------------------------------|-------------------|-----------------------|---------------------|----------------------|-------------------------------------|-------------------------------------|-------------------------------------|--------------------------------|--------------------------|-----------------|
| Otu1133 | 0.6                       | 0                             | 0.2               | 1.19                  | 0.2                 | 67.41                | unclass. <i>Bacteria</i>            | unclass. <i>Bacteria</i>            | unclass. <i>Bacteria</i>            | unclass. <i>Bacteria</i>       | unclass. <i>Bacteria</i> | <i>Bacteria</i> |
| Otu0062 | 0.55                      | 0                             | 0.19              | 0.73                  | 0.2                 | 67.61                | <i>Haliea</i>                       | <i>Alteromonadaceae</i>             | <i>Alteromonadales</i>              | <i>Gammaproteobacteria</i>     | <i>Proteobacteria</i>    | <i>Bacteria</i> |
| Otu0707 | 0.55                      | 0                             | 0.19              | 0.73                  | 0.2                 | 67.8                 | <i>Haliea</i>                       | <i>Alteromonadaceae</i>             | <i>Alteromonadales</i>              | <i>Gammaproteobacteria</i>     | <i>Proteobacteria</i>    | <i>Bacteria</i> |
| Otu0333 | 0.6                       | 0                             | 0.19              | 1.2                   | 0.2                 | 68                   | unclass. <i>Gammaproteobacteria</i> | unclass. <i>Gammaproteobacteria</i> | unclass. <i>Gammaproteobacteria</i> | <i>Gammaproteobacteria</i>     | <i>Proteobacteria</i>    | <i>Bacteria</i> |
| Otu0974 | 0.57                      | 0                             | 0.18              | 0.8                   | 0.19                | 68.19                | unclass. <i>Flavobacteriaceae</i>   | <i>Flavobacteriaceae</i>            | <i>Flavobacteriales</i>             | <i>Flavobacteria</i>           | <i>Bacteroidetes</i>     | <i>Bacteria</i> |
| Otu0379 | 0.55                      | 0                             | 0.18              | 0.78                  | 0.19                | 68.38                | unclass. <i>Proteobacteria</i>      | unclass. <i>Proteobacteria</i>      | unclass. <i>Proteobacteria</i>      | unclass. <i>Proteobacteria</i> | <i>Proteobacteria</i>    | <i>Bacteria</i> |
| Otu0143 | 0.48                      | 0                             | 0.18              | 0.77                  | 0.18                | 68.56                | unclass. <i>Gammaproteobacteria</i> | unclass. <i>Gammaproteobacteria</i> | unclass. <i>Gammaproteobacteria</i> | <i>Gammaproteobacteria</i>     | <i>Proteobacteria</i>    | <i>Bacteria</i> |
| Otu0192 | 0.48                      | 0                             | 0.18              | 0.77                  | 0.18                | 68.74                | unclass. <i>Gammaproteobacteria</i> | unclass. <i>Gammaproteobacteria</i> | unclass. <i>Gammaproteobacteria</i> | <i>Gammaproteobacteria</i>     | <i>Proteobacteria</i>    | <i>Bacteria</i> |
| Otu0359 | 0.48                      | 0                             | 0.17              | 0.79                  | 0.18                | 68.92                | unclass. <i>Gammaproteobacteria</i> | unclass. <i>Gammaproteobacteria</i> | unclass. <i>Gammaproteobacteria</i> | <i>Gammaproteobacteria</i>     | <i>Proteobacteria</i>    | <i>Bacteria</i> |
| Otu1114 | 0.48                      | 0                             | 0.17              | 0.79                  | 0.18                | 69.09                | unclass. <i>Microbacteriaceae</i>   | <i>Microbacteriaceae</i>            | <i>Actinomycetales</i>              | <i>Actinobacteria</i>          | <i>Actinobacteria</i>    | <i>Bacteria</i> |
| Otu1193 | 0.48                      | 0                             | 0.17              | 0.77                  | 0.18                | 69.27                | unclass. <i>Saprospiraceae</i>      | <i>Saprospiraceae</i>               | <i>Sphingobacteriales</i>           | <i>Sphingobacteria</i>         | <i>Bacteroidetes</i>     | <i>Bacteria</i> |
| Otu0731 | 0.45                      | 0                             | 0.17              | 0.49                  | 0.17                | 69.44                | <i>Lentisphaera</i>                 | <i>Lentisphaeraceae</i>             | <i>Lentisphaerales</i>              | <i>Lentisphaeria</i>           | <i>Lentisphaerae</i>     | <i>Bacteria</i> |
| Otu0761 | 0.48                      | 0                             | 0.17              | 0.79                  | 0.17                | 69.61                | unclass. <i>Verrucomicrobiaceae</i> | <i>Verrucomicrobiaceae</i>          | <i>Verrucomicrobiales</i>           | <i>Verrucomicrobiae</i>        | <i>Verrucomicrobia</i>   | <i>Bacteria</i> |
| Otu0812 | 0.48                      | 0                             | 0.16              | 0.79                  | 0.17                | 69.78                | unclass. <i>Gammaproteobacteria</i> | unclass. <i>Gammaproteobacteria</i> | unclass. <i>Gammaproteobacteria</i> | <i>Gammaproteobacteria</i>     | <i>Proteobacteria</i>    | <i>Bacteria</i> |
| Otu0809 | 0.49                      | 0                             | 0.16              | 0.49                  | 0.17                | 69.95                | unclass. <i>Gammaproteobacteria</i> | unclass. <i>Gammaproteobacteria</i> | unclass. <i>Gammaproteobacteria</i> | <i>Gammaproteobacteria</i>     | <i>Proteobacteria</i>    | <i>Bacteria</i> |
| Otu0570 | 0                         | 0.48                          | 0.16              | 0.78                  | 0.16                | 70.11                | <i>Enhydrobacter</i>                | <i>Moraxellaceae</i>                | <i>Pseudomonadales</i>              | <i>Gammaproteobacteria</i>     | <i>Proteobacteria</i>    | <i>Bacteria</i> |
| Otu0046 | 0.48                      | 0                             | 0.16              | 0.78                  | 0.16                | 70.27                | unclass. <i>Flavobacteriaceae</i>   | <i>Flavobacteriaceae</i>            | <i>Flavobacteriales</i>             | <i>Flavobacteria</i>           | <i>Bacteroidetes</i>     | <i>Bacteria</i> |
| Otu0213 | 0.48                      | 0                             | 0.16              | 0.79                  | 0.16                | 70.43                | unclass. <i>Gammaproteobacteria</i> | unclass. <i>Gammaproteobacteria</i> | unclass. <i>Gammaproteobacteria</i> | <i>Gammaproteobacteria</i>     | <i>Proteobacteria</i>    | <i>Bacteria</i> |
| Otu0744 | 0.48                      | 0                             | 0.16              | 0.79                  | 0.16                | 70.6                 | unclass. <i>Gammaproteobacteria</i> | unclass. <i>Gammaproteobacteria</i> | unclass. <i>Gammaproteobacteria</i> | <i>Gammaproteobacteria</i>     | <i>Proteobacteria</i>    | <i>Bacteria</i> |
| Otu1343 | 0.48                      | 0                             | 0.16              | 0.79                  | 0.16                | 70.76                | <i>Planctomyces</i>                 | <i>Planctomycetaceae</i>            | <i>Planctomycetales</i>             | <i>Planctomycetacia</i>        | <i>Planctomycetes</i>    | <i>Bacteria</i> |
| Otu0510 | 0.48                      | 0                             | 0.16              | 0.78                  | 0.16                | 70.92                | unclass. <i>Gammaproteobacteria</i> | unclass. <i>Gammaproteobacteria</i> | unclass. <i>Gammaproteobacteria</i> | <i>Gammaproteobacteria</i>     | <i>Proteobacteria</i>    | <i>Bacteria</i> |
| Otu0421 | 0.48                      | 0                             | 0.16              | 0.77                  | 0.16                | 71.08                | unclass. <i>Gammaproteobacteria</i> | unclass. <i>Gammaproteobacteria</i> | unclass. <i>Gammaproteobacteria</i> | <i>Gammaproteobacteria</i>     | <i>Proteobacteria</i>    | <i>Bacteria</i> |
| Otu0833 | 0.48                      | 0                             | 0.15              | 0.79                  | 0.16                | 71.23                | <i>Alcanivorax</i>                  | <i>Alcanivoracaceae</i>             | <i>Oceanospirillales</i>            | <i>Gammaproteobacteria</i>     | <i>Proteobacteria</i>    | <i>Bacteria</i> |
| Otu1197 | 0.4                       | 0                             | 0.15              | 0.49                  | 0.15                | 71.39                | unclass. <i>Gammaproteobacteria</i> | unclass. <i>Gammaproteobacteria</i> | unclass. <i>Gammaproteobacteria</i> | <i>Gammaproteobacteria</i>     | <i>Proteobacteria</i>    | <i>Bacteria</i> |
| Otu0041 | 0.2                       | 0.4                           | 0.15              | 0.86                  | 0.15                | 71.54                | <i>Sulfitobacter</i>                | <i>Rhodobacteraceae</i>             | <i>Rhodobacteriales</i>             | <i>Alphaproteobacteria</i>     | <i>Proteobacteria</i>    | <i>Bacteria</i> |
| Otu0622 | 0.2                       | 0.4                           | 0.15              | 0.87                  | 0.15                | 71.69                | <i>Colwellia</i>                    | <i>Colwelliaceae</i>                | <i>Alteromonadales</i>              | <i>Gammaproteobacteria</i>     | <i>Proteobacteria</i>    | <i>Bacteria</i> |
| Otu0738 | 0.4                       | 0                             | 0.15              | 0.8                   | 0.15                | 71.84                | unclass. <i>Alphaproteobacteria</i> | unclass. <i>Alphaproteobacteria</i> | unclass. <i>Alphaproteobacteria</i> | <i>Alphaproteobacteria</i>     | <i>Proteobacteria</i>    | <i>Bacteria</i> |

| OTU     | Av. A <sub>i</sub><br>(no) | Av. A <sub>i</sub><br>(serial) | Av. δ <sub>i</sub> | Av. δ <sub>i</sub> /SD | Av. δ <sub>i</sub> % | ΣAv. δ <sub>i</sub> % | Genus                               | Family                              | Order                               | Class                          | Phylum                   | Domain          |
|---------|----------------------------|--------------------------------|--------------------|------------------------|----------------------|-----------------------|-------------------------------------|-------------------------------------|-------------------------------------|--------------------------------|--------------------------|-----------------|
| Otu1296 | 0.4                        | 0                              | 0.15               | 0.8                    | 0.15                 | 71.99                 | unclass. <i>Proteobacteria</i>      | unclass. <i>Proteobacteria</i>      | unclass. <i>Proteobacteria</i>      | unclass. <i>Proteobacteria</i> | <i>Proteobacteria</i>    | <i>Bacteria</i> |
| Otu1300 | 0.4                        | 0                              | 0.15               | 0.8                    | 0.15                 | 72.13                 | unclass. <i>Proteobacteria</i>      | unclass. <i>Proteobacteria</i>      | unclass. <i>Proteobacteria</i>      | unclass. <i>Proteobacteria</i> | <i>Proteobacteria</i>    | <i>Bacteria</i> |
| Otu0011 | 0.4                        | 0                              | 0.14               | 0.8                    | 0.15                 | 72.28                 | unclass. <i>Flavobacteriaceae</i>   | <i>Flavobacteriaceae</i>            | <i>Flavobacteriales</i>             | <i>Flavobacteria</i>           | <i>Bacteroidetes</i>     | <i>Bacteria</i> |
| Otu0915 | 0.4                        | 0                              | 0.14               | 0.8                    | 0.15                 | 72.42                 | unclass. <i>Alphaproteobacteria</i> | unclass. <i>Alphaproteobacteria</i> | unclass. <i>Alphaproteobacteria</i> | <i>Alphaproteobacteria</i>     | <i>Proteobacteria</i>    | <i>Bacteria</i> |
| Otu0219 | 0.4                        | 0                              | 0.14               | 0.8                    | 0.14                 | 72.57                 | unclass. <i>Erythrobacteraceae</i>  | <i>Erythrobacteraceae</i>           | <i>Sphingomonadales</i>             | <i>Alphaproteobacteria</i>     | <i>Proteobacteria</i>    | <i>Bacteria</i> |
| Otu0368 | 0.4                        | 0                              | 0.14               | 0.79                   | 0.14                 | 72.71                 | unclass. <i>Saprospiraceae</i>      | <i>Saprospiraceae</i>               | <i>Sphingobacteriales</i>           | <i>Sphingobacteria</i>         | <i>Bacteroidetes</i>     | <i>Bacteria</i> |
| Otu0300 | 0.4                        | 0                              | 0.14               | 0.8                    | 0.14                 | 72.85                 | unclass. <i>Gammaproteobacteria</i> | unclass. <i>Gammaproteobacteria</i> | unclass. <i>Gammaproteobacteria</i> | <i>Gammaproteobacteria</i>     | <i>Proteobacteria</i>    | <i>Bacteria</i> |
| Otu1061 | 0                          | 0.4                            | 0.13               | 0.8                    | 0.14                 | 72.98                 | unclass. <i>Bacteria</i>            | unclass. <i>Bacteria</i>            | unclass. <i>Bacteria</i>            | unclass. <i>Bacteria</i>       | unclass. <i>Bacteria</i> | <i>Bacteria</i> |
| Otu0426 | 0.4                        | 0                              | 0.13               | 0.8                    | 0.14                 | 73.12                 | unclass. <i>Gammaproteobacteria</i> | unclass. <i>Gammaproteobacteria</i> | unclass. <i>Gammaproteobacteria</i> | <i>Gammaproteobacteria</i>     | <i>Proteobacteria</i>    | <i>Bacteria</i> |
| Otu0998 | 0.4                        | 0                              | 0.13               | 0.8                    | 0.14                 | 73.26                 | unclass. <i>Gammaproteobacteria</i> | unclass. <i>Gammaproteobacteria</i> | unclass. <i>Gammaproteobacteria</i> | <i>Gammaproteobacteria</i>     | <i>Proteobacteria</i>    | <i>Bacteria</i> |
| Otu1130 | 0.4                        | 0                              | 0.13               | 0.8                    | 0.14                 | 73.4                  | unclass. <i>Bacteria</i>            | unclass. <i>Bacteria</i>            | unclass. <i>Bacteria</i>            | unclass. <i>Bacteria</i>       | unclass. <i>Bacteria</i> | <i>Bacteria</i> |
| Otu1333 | 0.4                        | 0                              | 0.13               | 0.8                    | 0.14                 | 73.53                 | unclass. <i>Legionellaceae</i>      | <i>Legionellaceae</i>               | <i>Legionellales</i>                | <i>Gammaproteobacteria</i>     | <i>Proteobacteria</i>    | <i>Bacteria</i> |
| Otu1348 | 0.4                        | 0                              | 0.13               | 0.8                    | 0.14                 | 73.67                 | unclass. <i>Gammaproteobacteria</i> | unclass. <i>Gammaproteobacteria</i> | unclass. <i>Gammaproteobacteria</i> | <i>Gammaproteobacteria</i>     | <i>Proteobacteria</i>    | <i>Bacteria</i> |
| Otu0177 | 0.4                        | 0                              | 0.13               | 0.8                    | 0.13                 | 73.8                  | <i>Haliae</i>                       | <i>Alteromonadaceae</i>             | <i>Alteromonadales</i>              | <i>Gammaproteobacteria</i>     | <i>Proteobacteria</i>    | <i>Bacteria</i> |
| Otu0194 | 0.4                        | 0                              | 0.13               | 0.8                    | 0.13                 | 73.93                 | unclass. <i>Bacteroidetes</i>       | unclass. <i>Bacteroidetes</i>       | unclass. <i>Bacteroidetes</i>       | unclass. <i>Bacteroidetes</i>  | <i>Bacteroidetes</i>     | <i>Bacteria</i> |
| Otu0464 | 0.4                        | 0                              | 0.13               | 0.8                    | 0.13                 | 74.07                 | unclass. <i>Bacteroidetes</i>       | unclass. <i>Bacteroidetes</i>       | unclass. <i>Bacteroidetes</i>       | unclass. <i>Bacteroidetes</i>  | <i>Bacteroidetes</i>     | <i>Bacteria</i> |
| Otu0973 | 0.4                        | 0                              | 0.13               | 0.8                    | 0.13                 | 74.2                  | unclass. <i>Flavobacteriaceae</i>   | <i>Flavobacteriaceae</i>            | <i>Flavobacteriales</i>             | <i>Flavobacteria</i>           | <i>Bacteroidetes</i>     | <i>Bacteria</i> |
| Otu1153 | 0.4                        | 0                              | 0.13               | 0.8                    | 0.13                 | 74.33                 | unclass. <i>Alphaproteobacteria</i> | unclass. <i>Alphaproteobacteria</i> | unclass. <i>Alphaproteobacteria</i> | <i>Alphaproteobacteria</i>     | <i>Proteobacteria</i>    | <i>Bacteria</i> |
| Otu0203 | 0.4                        | 0                              | 0.13               | 0.8                    | 0.13                 | 74.46                 | <i>Pelagibacter</i>                 | SAR11-clade                         | <i>Rickettsiales</i>                | <i>Alphaproteobacteria</i>     | <i>Proteobacteria</i>    | <i>Bacteria</i> |
| Otu0741 | 0.4                        | 0                              | 0.13               | 0.8                    | 0.13                 | 74.6                  | unclass. <i>Alphaproteobacteria</i> | unclass. <i>Alphaproteobacteria</i> | unclass. <i>Alphaproteobacteria</i> | <i>Alphaproteobacteria</i>     | <i>Proteobacteria</i>    | <i>Bacteria</i> |
| Otu0859 | 0.4                        | 0                              | 0.13               | 0.8                    | 0.13                 | 74.73                 | unclass. <i>Flavobacteriaceae</i>   | <i>Flavobacteriaceae</i>            | <i>Flavobacteriales</i>             | <i>Flavobacteria</i>           | <i>Bacteroidetes</i>     | <i>Bacteria</i> |
| Otu0934 | 0.4                        | 0                              | 0.13               | 0.8                    | 0.13                 | 74.86                 | unclass. <i>Bacteria</i>            | unclass. <i>Bacteria</i>            | unclass. <i>Bacteria</i>            | unclass. <i>Bacteria</i>       | unclass. <i>Bacteria</i> | <i>Bacteria</i> |
| Otu1147 | 0.4                        | 0                              | 0.13               | 0.8                    | 0.13                 | 74.99                 | unclass. <i>Bacteria</i>            | unclass. <i>Bacteria</i>            | unclass. <i>Bacteria</i>            | unclass. <i>Bacteria</i>       | unclass. <i>Bacteria</i> | <i>Bacteria</i> |
| Otu1234 | 0.4                        | 0                              | 0.13               | 0.8                    | 0.13                 | 75.12                 | unclass. <i>Oceanospirillaceae</i>  | <i>Oceanospirillaceae</i>           | <i>Oceanospirillales</i>            | <i>Gammaproteobacteria</i>     | <i>Proteobacteria</i>    | <i>Bacteria</i> |
| Otu0495 | 0.4                        | 0                              | 0.13               | 0.8                    | 0.13                 | 75.25                 | unclass. <i>Flavobacteriales</i>    | unclass. <i>Flavobacteriales</i>    | <i>Flavobacteriales</i>             | <i>Flavobacteria</i>           | <i>Bacteroidetes</i>     | <i>Bacteria</i> |
| Otu1049 | 0.4                        | 0                              | 0.13               | 0.8                    | 0.13                 | 75.38                 | unclass. <i>Gammaproteobacteria</i> | unclass. <i>Gammaproteobacteria</i> | unclass. <i>Gammaproteobacteria</i> | <i>Gammaproteobacteria</i>     | <i>Proteobacteria</i>    | <i>Bacteria</i> |
| Otu1106 | 0.4                        | 0                              | 0.13               | 0.8                    | 0.13                 | 75.51                 | unclass. <i>Bacteria</i>            | unclass. <i>Bacteria</i>            | unclass. <i>Bacteria</i>            | unclass. <i>Bacteria</i>       | unclass. <i>Bacteria</i> | <i>Bacteria</i> |



| OTU     | Av.A <sub>i</sub><br>(no) | Av.A <sub>i</sub><br>(serial) | Av.δ <sub>i</sub> | Av.δ <sub>i</sub> /SD | Av.δ <sub>i</sub> % | ΣAv.δ <sub>i</sub> % | Genus                               | Family                              | Order                               | Class                          | Phylum                   | Domain          |
|---------|---------------------------|-------------------------------|-------------------|-----------------------|---------------------|----------------------|-------------------------------------|-------------------------------------|-------------------------------------|--------------------------------|--------------------------|-----------------|
| Otu1116 | 0.4                       | 0                             | 0.13              | 0.8                   | 0.13                | 75.63                | unclass. <i>Gammaproteobacteria</i> | unclass. <i>Gammaproteobacteria</i> | unclass. <i>Gammaproteobacteria</i> | <i>Gammaproteobacteria</i>     | <i>Proteobacteria</i>    | <i>Bacteria</i> |
| Otu1131 | 0.4                       | 0                             | 0.13              | 0.8                   | 0.13                | 75.76                | unclass. <i>Bacteria</i>            | unclass. <i>Bacteria</i>            | unclass. <i>Bacteria</i>            | unclass. <i>Bacteria</i>       | unclass. <i>Bacteria</i> | <i>Bacteria</i> |
| Otu1148 | 0.4                       | 0                             | 0.13              | 0.8                   | 0.13                | 75.89                | unclass. <i>Gammaproteobacteria</i> | unclass. <i>Gammaproteobacteria</i> | unclass. <i>Gammaproteobacteria</i> | <i>Gammaproteobacteria</i>     | <i>Proteobacteria</i>    | <i>Bacteria</i> |
| Otu1199 | 0.4                       | 0                             | 0.13              | 0.8                   | 0.13                | 76.02                | unclass. <i>Rhodobacteraceae</i>    | <i>Rhodobacteraceae</i>             | <i>Rhodobacterales</i>              | <i>Alphaproteobacteria</i>     | <i>Proteobacteria</i>    | <i>Bacteria</i> |
| Otu1350 | 0.4                       | 0                             | 0.12              | 0.49                  | 0.13                | 76.15                | unclass. <i>Bacteria</i>            | unclass. <i>Bacteria</i>            | unclass. <i>Bacteria</i>            | unclass. <i>Bacteria</i>       | unclass. <i>Bacteria</i> | <i>Bacteria</i> |
| Otu0849 | 0.35                      | 0                             | 0.12              | 0.49                  | 0.12                | 76.27                | unclass. <i>Alphaproteobacteria</i> | unclass. <i>Alphaproteobacteria</i> | unclass. <i>Alphaproteobacteria</i> | <i>Alphaproteobacteria</i>     | <i>Proteobacteria</i>    | <i>Bacteria</i> |
| Otu1098 | 0.35                      | 0                             | 0.11              | 0.49                  | 0.11                | 76.38                | unclass. <i>Flavobacteriaceae</i>   | <i>Flavobacteriaceae</i>            | <i>Flavobacteriales</i>             | <i>Flavobacteria</i>           | <i>Bacteroidetes</i>     | <i>Bacteria</i> |
| Otu0821 | 0.35                      | 0                             | 0.11              | 0.49                  | 0.11                | 76.49                | unclass. <i>Bacteria</i>            | unclass. <i>Bacteria</i>            | unclass. <i>Bacteria</i>            | unclass. <i>Bacteria</i>       | unclass. <i>Bacteria</i> | <i>Bacteria</i> |
| Otu1030 | 0.35                      | 0                             | 0.11              | 0.49                  | 0.11                | 76.6                 | unclass. <i>Proteobacteria</i>      | unclass. <i>Proteobacteria</i>      | unclass. <i>Proteobacteria</i>      | unclass. <i>Proteobacteria</i> | <i>Proteobacteria</i>    | <i>Bacteria</i> |
| Otu0040 | 0.28                      | 0                             | 0.11              | 0.49                  | 0.11                | 76.71                | <i>Erythrobacter</i>                | <i>Erythrobacteraceae</i>           | <i>Sphingomonadales</i>             | <i>Alphaproteobacteria</i>     | <i>Proteobacteria</i>    | <i>Bacteria</i> |
| Otu1283 | 0.28                      | 0                             | 0.11              | 0.49                  | 0.11                | 76.82                | <i>Croceibacter</i>                 | <i>Flavobacteriaceae</i>            | <i>Flavobacteriales</i>             | <i>Flavobacteria</i>           | <i>Bacteroidetes</i>     | <i>Bacteria</i> |
| Otu0140 | 0.2                       | 0.2                           | 0.1               | 0.67                  | 0.11                | 76.93                | <i>Oleispira</i>                    | <i>Oceanospirillaceae</i>           | <i>Oceanospirillales</i>            | <i>Gammaproteobacteria</i>     | <i>Proteobacteria</i>    | <i>Bacteria</i> |
| Otu0142 | 0.28                      | 0                             | 0.1               | 0.49                  | 0.1                 | 77.03                | unclass. <i>Gammaproteobacteria</i> | unclass. <i>Gammaproteobacteria</i> | unclass. <i>Gammaproteobacteria</i> | <i>Gammaproteobacteria</i>     | <i>Proteobacteria</i>    | <i>Bacteria</i> |
| Otu0513 | 0.28                      | 0                             | 0.1               | 0.49                  | 0.1                 | 77.13                | unclass. <i>Bacteroidetes</i>       | unclass. <i>Bacteroidetes</i>       | unclass. <i>Bacteroidetes</i>       | unclass. <i>Bacteroidetes</i>  | <i>Bacteroidetes</i>     | <i>Bacteria</i> |
| Otu0699 | 0.28                      | 0                             | 0.1               | 0.49                  | 0.1                 | 77.23                | unclass. <i>Flavobacteriales</i>    | unclass. <i>Flavobacteriales</i>    | <i>Flavobacteriales</i>             | <i>Flavobacteria</i>           | <i>Bacteroidetes</i>     | <i>Bacteria</i> |
| Otu0739 | 0.28                      | 0                             | 0.1               | 0.49                  | 0.1                 | 77.34                | unclass. <i>Proteobacteria</i>      | unclass. <i>Proteobacteria</i>      | unclass. <i>Proteobacteria</i>      | unclass. <i>Proteobacteria</i> | <i>Proteobacteria</i>    | <i>Bacteria</i> |
| Otu1076 | 0.28                      | 0                             | 0.1               | 0.49                  | 0.1                 | 77.44                | <i>Acinetobacter</i>                | <i>Moraxellaceae</i>                | <i>Pseudomonadales</i>              | <i>Gammaproteobacteria</i>     | <i>Proteobacteria</i>    | <i>Bacteria</i> |
| Otu1317 | 0.28                      | 0                             | 0.1               | 0.49                  | 0.1                 | 77.54                | unclass. <i>Bacteria</i>            | unclass. <i>Bacteria</i>            | unclass. <i>Bacteria</i>            | unclass. <i>Bacteria</i>       | unclass. <i>Bacteria</i> | <i>Bacteria</i> |
| Otu1058 | 0                         | 0.28                          | 0.1               | 0.49                  | 0.1                 | 77.64                | unclass. <i>Proteobacteria</i>      | unclass. <i>Proteobacteria</i>      | unclass. <i>Proteobacteria</i>      | unclass. <i>Proteobacteria</i> | <i>Proteobacteria</i>    | <i>Bacteria</i> |
| Otu0035 | 0.28                      | 0                             | 0.09              | 0.49                  | 0.1                 | 77.73                | <i>Colwellia</i>                    | <i>Colwelliaceae</i>                | <i>Alteromonadales</i>              | <i>Gammaproteobacteria</i>     | <i>Proteobacteria</i>    | <i>Bacteria</i> |
| Otu0256 | 0.28                      | 0                             | 0.09              | 0.49                  | 0.1                 | 77.83                | <i>Glaciicola</i>                   | <i>Alteromonadaceae</i>             | <i>Alteromonadales</i>              | <i>Gammaproteobacteria</i>     | <i>Proteobacteria</i>    | <i>Bacteria</i> |
| Otu1007 | 0.28                      | 0                             | 0.09              | 0.49                  | 0.1                 | 77.93                | unclass. <i>Erythrobacteraceae</i>  | <i>Erythrobacteraceae</i>           | <i>Sphingomonadales</i>             | <i>Alphaproteobacteria</i>     | <i>Proteobacteria</i>    | <i>Bacteria</i> |
| Otu1233 | 0.28                      | 0                             | 0.09              | 0.49                  | 0.1                 | 78.02                | unclass. <i>Flavobacteriaceae</i>   | <i>Flavobacteriaceae</i>            | <i>Flavobacteriales</i>             | <i>Flavobacteria</i>           | <i>Bacteroidetes</i>     | <i>Bacteria</i> |
| Otu1276 | 0.28                      | 0                             | 0.09              | 0.49                  | 0.1                 | 78.12                | unclass. <i>Flammeovirgaceae</i>    | <i>Flammeovirgaceae</i>             | <i>Sphingobacteriales</i>           | <i>Sphingobacteria</i>         | <i>Bacteroidetes</i>     | <i>Bacteria</i> |
| Otu1134 | 0.28                      | 0                             | 0.09              | 0.49                  | 0.09                | 78.21                | unclass. <i>Gammaproteobacteria</i> | unclass. <i>Gammaproteobacteria</i> | unclass. <i>Gammaproteobacteria</i> | <i>Gammaproteobacteria</i>     | <i>Proteobacteria</i>    | <i>Bacteria</i> |
| Otu0030 | 0.28                      | 0                             | 0.09              | 0.49                  | 0.09                | 78.3                 | unclass. <i>Gammaproteobacteria</i> | unclass. <i>Gammaproteobacteria</i> | unclass. <i>Gammaproteobacteria</i> | <i>Gammaproteobacteria</i>     | <i>Proteobacteria</i>    | <i>Bacteria</i> |
| Otu0518 | 0.28                      | 0                             | 0.09              | 0.49                  | 0.09                | 78.39                | unclass. <i>Proteobacteria</i>      | unclass. <i>Proteobacteria</i>      | unclass. <i>Proteobacteria</i>      | unclass. <i>Proteobacteria</i> | <i>Proteobacteria</i>    | <i>Bacteria</i> |

| OTU     | Av. A <sub>i</sub><br>(no) | Av. A <sub>i</sub><br>(serial) | Av. δ <sub>i</sub> | Av. δ <sub>i</sub> /SD | Av. δ <sub>i</sub> % | ΣAv. δ <sub>i</sub> % | Genus                               | Family                              | Order                               | Class                          | Phylum                   | Domain          |
|---------|----------------------------|--------------------------------|--------------------|------------------------|----------------------|-----------------------|-------------------------------------|-------------------------------------|-------------------------------------|--------------------------------|--------------------------|-----------------|
| Otu0724 | 0.28                       | 0                              | 0.09               | 0.49                   | 0.09                 | 78.48                 | unclass. <i>Bacteria</i>            | unclass. <i>Bacteria</i>            | unclass. <i>Bacteria</i>            | unclass. <i>Bacteria</i>       | unclass. <i>Bacteria</i> | <i>Bacteria</i> |
| Otu0734 | 0.28                       | 0                              | 0.09               | 0.49                   | 0.09                 | 78.57                 | unclass. <i>Bacteria</i>            | unclass. <i>Bacteria</i>            | unclass. <i>Bacteria</i>            | unclass. <i>Bacteria</i>       | unclass. <i>Bacteria</i> | <i>Bacteria</i> |
| Otu0832 | 0.28                       | 0                              | 0.09               | 0.49                   | 0.09                 | 78.66                 | unclass. <i>Rhodospirillaceae</i>   | <i>Rhodospirillaceae</i>            | <i>Rhodospirillales</i>             | <i>Alphaproteobacteria</i>     | <i>Proteobacteria</i>    | <i>Bacteria</i> |
| Otu1211 | 0.28                       | 0                              | 0.09               | 0.49                   | 0.09                 | 78.75                 | unclass. <i>Oceanospirillaceae</i>  | <i>Oceanospirillaceae</i>           | <i>Oceanospirillales</i>            | <i>Gammaproteobacteria</i>     | <i>Proteobacteria</i>    | <i>Bacteria</i> |
| Otu1235 | 0.28                       | 0                              | 0.09               | 0.49                   | 0.09                 | 78.84                 | unclass. <i>Proteobacteria</i>      | unclass. <i>Proteobacteria</i>      | unclass. <i>Proteobacteria</i>      | unclass. <i>Proteobacteria</i> | <i>Proteobacteria</i>    | <i>Bacteria</i> |
| Otu1278 | 0.28                       | 0                              | 0.09               | 0.49                   | 0.09                 | 78.93                 | unclass. <i>Betaproteobacteria</i>  | unclass. <i>Betaproteobacteria</i>  | unclass. <i>Betaproteobacteria</i>  | <i>Betaproteobacteria</i>      | <i>Proteobacteria</i>    | <i>Bacteria</i> |
| Otu0042 | 0.2                        | 0                              | 0.08               | 0.49                   | 0.08                 | 79                    | <i>Rhodococcus</i>                  | <i>Nocardiaceae</i>                 | <i>Actinomycetales</i>              | <i>Actinobacteria</i>          | <i>Actinobacteria</i>    | <i>Bacteria</i> |
| Otu0093 | 0.2                        | 0                              | 0.08               | 0.49                   | 0.08                 | 79.08                 | <i>Aestuariicola</i>                | <i>Flavobacteriaceae</i>            | <i>Flavobacteriales</i>             | <i>Flavobacteria</i>           | <i>Bacteroidetes</i>     | <i>Bacteria</i> |
| Otu0253 | 0.2                        | 0                              | 0.08               | 0.49                   | 0.08                 | 79.16                 | unclass. <i>Saprospiraceae</i>      | <i>Saprospiraceae</i>               | <i>Sphingobacteriales</i>           | <i>Sphingobacteria</i>         | <i>Bacteroidetes</i>     | <i>Bacteria</i> |
| Otu0280 | 0.2                        | 0                              | 0.08               | 0.49                   | 0.08                 | 79.23                 | <i>Marinobacter</i>                 | <i>Alteromonadaceae</i>             | <i>Alteromonadales</i>              | <i>Gammaproteobacteria</i>     | <i>Proteobacteria</i>    | <i>Bacteria</i> |
| Otu0324 | 0.2                        | 0                              | 0.08               | 0.49                   | 0.08                 | 79.31                 | <i>Nisaea</i>                       | <i>Rhodospirillaceae</i>            | <i>Rhodospirillales</i>             | <i>Alphaproteobacteria</i>     | <i>Proteobacteria</i>    | <i>Bacteria</i> |
| Otu0558 | 0.2                        | 0                              | 0.08               | 0.49                   | 0.08                 | 79.39                 | unclass. <i>Gammaproteobacteria</i> | unclass. <i>Gammaproteobacteria</i> | unclass. <i>Gammaproteobacteria</i> | <i>Gammaproteobacteria</i>     | <i>Proteobacteria</i>    | <i>Bacteria</i> |
| Otu0704 | 0.2                        | 0                              | 0.08               | 0.49                   | 0.08                 | 79.47                 | unclass. <i>Proteobacteria</i>      | unclass. <i>Proteobacteria</i>      | unclass. <i>Proteobacteria</i>      | unclass. <i>Proteobacteria</i> | <i>Proteobacteria</i>    | <i>Bacteria</i> |
| Otu0740 | 0.2                        | 0                              | 0.08               | 0.49                   | 0.08                 | 79.54                 | unclass. <i>Betaproteobacteria</i>  | unclass. <i>Betaproteobacteria</i>  | unclass. <i>Betaproteobacteria</i>  | <i>Betaproteobacteria</i>      | <i>Proteobacteria</i>    | <i>Bacteria</i> |
| Otu0928 | 0.2                        | 0                              | 0.08               | 0.49                   | 0.08                 | 79.62                 | <i>Crocinitomix</i>                 | <i>Cryomorphaceae</i>               | <i>Flavobacteriales</i>             | <i>Flavobacteria</i>           | <i>Bacteroidetes</i>     | <i>Bacteria</i> |
| Otu1202 | 0.2                        | 0                              | 0.08               | 0.49                   | 0.08                 | 79.7                  | unclass. <i>Gammaproteobacteria</i> | unclass. <i>Gammaproteobacteria</i> | unclass. <i>Gammaproteobacteria</i> | <i>Gammaproteobacteria</i>     | <i>Proteobacteria</i>    | <i>Bacteria</i> |
| Otu1215 | 0.2                        | 0                              | 0.08               | 0.49                   | 0.08                 | 79.77                 | unclass. <i>Gammaproteobacteria</i> | unclass. <i>Gammaproteobacteria</i> | unclass. <i>Gammaproteobacteria</i> | <i>Gammaproteobacteria</i>     | <i>Proteobacteria</i>    | <i>Bacteria</i> |
| Otu1282 | 0.2                        | 0                              | 0.08               | 0.49                   | 0.08                 | 79.85                 | unclass. <i>Gammaproteobacteria</i> | unclass. <i>Gammaproteobacteria</i> | unclass. <i>Gammaproteobacteria</i> | <i>Gammaproteobacteria</i>     | <i>Proteobacteria</i>    | <i>Bacteria</i> |
| Otu1284 | 0.2                        | 0                              | 0.08               | 0.49                   | 0.08                 | 79.93                 | unclass. <i>Bacteroidetes</i>       | unclass. <i>Bacteroidetes</i>       | unclass. <i>Bacteroidetes</i>       | unclass. <i>Bacteroidetes</i>  | <i>Bacteroidetes</i>     | <i>Bacteria</i> |
| Otu1285 | 0.2                        | 0                              | 0.08               | 0.49                   | 0.08                 | 80                    | unclass. <i>Myxococcales</i>        | unclass. <i>Myxococcales</i>        | <i>Myxococcales</i>                 | <i>Deltaproteobacteria</i>     | <i>Proteobacteria</i>    | <i>Bacteria</i> |
| Otu1287 | 0.2                        | 0                              | 0.08               | 0.49                   | 0.08                 | 80.08                 | unclass. <i>Flavobacteriaceae</i>   | <i>Flavobacteriaceae</i>            | <i>Flavobacteriales</i>             | <i>Flavobacteria</i>           | <i>Bacteroidetes</i>     | <i>Bacteria</i> |
| Otu1288 | 0.2                        | 0                              | 0.08               | 0.49                   | 0.08                 | 80.16                 | unclass. <i>Bacteria</i>            | unclass. <i>Bacteria</i>            | unclass. <i>Bacteria</i>            | unclass. <i>Bacteria</i>       | unclass. <i>Bacteria</i> | <i>Bacteria</i> |
| Otu1289 | 0.2                        | 0                              | 0.08               | 0.49                   | 0.08                 | 80.24                 | unclass. <i>Bacteroidetes</i>       | unclass. <i>Bacteroidetes</i>       | unclass. <i>Bacteroidetes</i>       | unclass. <i>Bacteroidetes</i>  | <i>Bacteroidetes</i>     | <i>Bacteria</i> |
| Otu1290 | 0.2                        | 0                              | 0.08               | 0.49                   | 0.08                 | 80.31                 | unclass. <i>Bacteria</i>            | unclass. <i>Bacteria</i>            | unclass. <i>Bacteria</i>            | unclass. <i>Bacteria</i>       | unclass. <i>Bacteria</i> | <i>Bacteria</i> |
| Otu1291 | 0.2                        | 0                              | 0.08               | 0.49                   | 0.08                 | 80.39                 | unclass. <i>Gammaproteobacteria</i> | unclass. <i>Gammaproteobacteria</i> | unclass. <i>Gammaproteobacteria</i> | <i>Gammaproteobacteria</i>     | <i>Proteobacteria</i>    | <i>Bacteria</i> |
| Otu1292 | 0.2                        | 0                              | 0.08               | 0.49                   | 0.08                 | 80.47                 | unclass. <i>Deltaproteobacteria</i> | unclass. <i>Deltaproteobacteria</i> | unclass. <i>Deltaproteobacteria</i> | <i>Deltaproteobacteria</i>     | <i>Proteobacteria</i>    | <i>Bacteria</i> |
| Otu1293 | 0.2                        | 0                              | 0.08               | 0.49                   | 0.08                 | 80.54                 | unclass. <i>Bacteroidetes</i>       | unclass. <i>Bacteroidetes</i>       | unclass. <i>Bacteroidetes</i>       | unclass. <i>Bacteroidetes</i>  | <i>Bacteroidetes</i>     | <i>Bacteria</i> |

| OTU     | Av. A <sub>i</sub><br>(no) | Av. A <sub>i</sub><br>(serial) | Av. δ <sub>i</sub> | Av. δ <sub>i</sub> /SD | Av. δ <sub>i</sub> % | ΣAv. δ <sub>i</sub> % | Genus                               | Family                              | Order                               | Class                          | Phylum                   | Domain          |
|---------|----------------------------|--------------------------------|--------------------|------------------------|----------------------|-----------------------|-------------------------------------|-------------------------------------|-------------------------------------|--------------------------------|--------------------------|-----------------|
| Otu1294 | 0.2                        | 0                              | 0.08               | 0.49                   | 0.08                 | 80.62                 | unclass. <i>Bacteria</i>            | unclass. <i>Bacteria</i>            | unclass. <i>Bacteria</i>            | unclass. <i>Bacteria</i>       | unclass. <i>Bacteria</i> | <i>Bacteria</i> |
| Otu1295 | 0.2                        | 0                              | 0.08               | 0.49                   | 0.08                 | 80.7                  | unclass. <i>Actinomycetales</i>     | unclass. <i>Actinomycetales</i>     | <i>Actinomycetales</i>              | <i>Actinobacteria</i>          | <i>Actinobacteria</i>    | <i>Bacteria</i> |
| Otu1298 | 0.2                        | 0                              | 0.08               | 0.49                   | 0.08                 | 80.78                 | unclass. <i>Gammaproteobacteria</i> | unclass. <i>Gammaproteobacteria</i> | unclass. <i>Gammaproteobacteria</i> | <i>Gammaproteobacteria</i>     | <i>Proteobacteria</i>    | <i>Bacteria</i> |
| Otu1301 | 0.2                        | 0                              | 0.08               | 0.49                   | 0.08                 | 80.85                 | unclass. <i>Alphaproteobacteria</i> | unclass. <i>Alphaproteobacteria</i> | unclass. <i>Alphaproteobacteria</i> | <i>Alphaproteobacteria</i>     | <i>Proteobacteria</i>    | <i>Bacteria</i> |
| Otu1302 | 0.2                        | 0                              | 0.08               | 0.49                   | 0.08                 | 80.93                 | unclass. <i>Bacteroidetes</i>       | unclass. <i>Bacteroidetes</i>       | unclass. <i>Bacteroidetes</i>       | unclass. <i>Bacteroidetes</i>  | <i>Bacteroidetes</i>     | <i>Bacteria</i> |
| Otu1303 | 0.2                        | 0                              | 0.08               | 0.49                   | 0.08                 | 81.01                 | unclass. <i>Acidobacteria_Gp17</i>  | unclass. <i>Acidobacteria_Gp17</i>  | unclass. <i>Acidobacteria_Gp17</i>  | <i>Acidobacteria_Gp17</i>      | <i>Acidobacteria</i>     | <i>Bacteria</i> |
| Otu1304 | 0.2                        | 0                              | 0.08               | 0.49                   | 0.08                 | 81.08                 | unclass. <i>Bacteria</i>            | unclass. <i>Bacteria</i>            | unclass. <i>Bacteria</i>            | unclass. <i>Bacteria</i>       | unclass. <i>Bacteria</i> | <i>Bacteria</i> |
| Otu1305 | 0.2                        | 0                              | 0.08               | 0.49                   | 0.08                 | 81.16                 | unclass. <i>Sphingobacteriales</i>  | unclass. <i>Sphingobacteriales</i>  | <i>Sphingobacteriales</i>           | <i>Sphingobacteria</i>         | <i>Bacteroidetes</i>     | <i>Bacteria</i> |
| Otu1306 | 0.2                        | 0                              | 0.08               | 0.49                   | 0.08                 | 81.24                 | unclass. <i>Gammaproteobacteria</i> | unclass. <i>Gammaproteobacteria</i> | unclass. <i>Gammaproteobacteria</i> | <i>Gammaproteobacteria</i>     | <i>Proteobacteria</i>    | <i>Bacteria</i> |
| Otu1307 | 0.2                        | 0                              | 0.08               | 0.49                   | 0.08                 | 81.31                 | unclass. <i>Gammaproteobacteria</i> | unclass. <i>Gammaproteobacteria</i> | unclass. <i>Gammaproteobacteria</i> | <i>Gammaproteobacteria</i>     | <i>Proteobacteria</i>    | <i>Bacteria</i> |
| Otu1308 | 0.2                        | 0                              | 0.08               | 0.49                   | 0.08                 | 81.39                 | unclass. <i>Flavobacteriaceae</i>   | <i>Flavobacteriaceae</i>            | <i>Flavobacteriales</i>             | <i>Flavobacteria</i>           | <i>Bacteroidetes</i>     | <i>Bacteria</i> |
| Otu1309 | 0.2                        | 0                              | 0.08               | 0.49                   | 0.08                 | 81.47                 | unclass. <i>Gammaproteobacteria</i> | unclass. <i>Gammaproteobacteria</i> | unclass. <i>Gammaproteobacteria</i> | <i>Gammaproteobacteria</i>     | <i>Proteobacteria</i>    | <i>Bacteria</i> |
| Otu1310 | 0.2                        | 0                              | 0.08               | 0.49                   | 0.08                 | 81.55                 | unclass. <i>Gammaproteobacteria</i> | unclass. <i>Gammaproteobacteria</i> | unclass. <i>Gammaproteobacteria</i> | <i>Gammaproteobacteria</i>     | <i>Proteobacteria</i>    | <i>Bacteria</i> |
| Otu1311 | 0.2                        | 0                              | 0.08               | 0.49                   | 0.08                 | 81.62                 | unclass. <i>Rhodobacteraceae</i>    | <i>Rhodobacteraceae</i>             | <i>Rhodobacterales</i>              | <i>Alphaproteobacteria</i>     | <i>Proteobacteria</i>    | <i>Bacteria</i> |
| Otu1312 | 0.2                        | 0                              | 0.08               | 0.49                   | 0.08                 | 81.7                  | unclass. <i>Proteobacteria</i>      | unclass. <i>Proteobacteria</i>      | unclass. <i>Proteobacteria</i>      | unclass. <i>Proteobacteria</i> | <i>Proteobacteria</i>    | <i>Bacteria</i> |
| Otu1314 | 0.2                        | 0                              | 0.08               | 0.49                   | 0.08                 | 81.78                 | unclass. <i>Acidobacteria_Gp22</i>  | unclass. <i>Acidobacteria_Gp22</i>  | unclass. <i>Acidobacteria_Gp22</i>  | <i>Acidobacteria_Gp22</i>      | <i>Acidobacteria</i>     | <i>Bacteria</i> |
| Otu1316 | 0.2                        | 0                              | 0.08               | 0.49                   | 0.08                 | 81.85                 | unclass. <i>Gammaproteobacteria</i> | unclass. <i>Gammaproteobacteria</i> | unclass. <i>Gammaproteobacteria</i> | <i>Gammaproteobacteria</i>     | <i>Proteobacteria</i>    | <i>Bacteria</i> |
| Otu0115 | 0.2                        | 0                              | 0.07               | 0.49                   | 0.07                 | 81.93                 | <i>Glaciecola</i>                   | <i>Alteromonadaceae</i>             | <i>Alteromonadales</i>              | <i>Gammaproteobacteria</i>     | <i>Proteobacteria</i>    | <i>Bacteria</i> |
| Otu0156 | 0.2                        | 0                              | 0.07               | 0.49                   | 0.07                 | 82                    | unclass. <i>Gammaproteobacteria</i> | unclass. <i>Gammaproteobacteria</i> | unclass. <i>Gammaproteobacteria</i> | <i>Gammaproteobacteria</i>     | <i>Proteobacteria</i>    | <i>Bacteria</i> |
| Otu0270 | 0.2                        | 0                              | 0.07               | 0.49                   | 0.07                 | 82.07                 | unclass. <i>Bacteroidetes</i>       | unclass. <i>Bacteroidetes</i>       | unclass. <i>Bacteroidetes</i>       | unclass. <i>Bacteroidetes</i>  | <i>Bacteroidetes</i>     | <i>Bacteria</i> |
| Otu0303 | 0.2                        | 0                              | 0.07               | 0.49                   | 0.07                 | 82.14                 | unclass. <i>Bacteroidetes</i>       | unclass. <i>Bacteroidetes</i>       | unclass. <i>Bacteroidetes</i>       | unclass. <i>Bacteroidetes</i>  | <i>Bacteroidetes</i>     | <i>Bacteria</i> |
| Otu0349 | 0.2                        | 0                              | 0.07               | 0.49                   | 0.07                 | 82.21                 | unclass. <i>Gammaproteobacteria</i> | unclass. <i>Gammaproteobacteria</i> | unclass. <i>Gammaproteobacteria</i> | <i>Gammaproteobacteria</i>     | <i>Proteobacteria</i>    | <i>Bacteria</i> |
| Otu0362 | 0.2                        | 0                              | 0.07               | 0.49                   | 0.07                 | 82.29                 | unclass. <i>Bacteroidetes</i>       | unclass. <i>Bacteroidetes</i>       | unclass. <i>Bacteroidetes</i>       | unclass. <i>Bacteroidetes</i>  | <i>Bacteroidetes</i>     | <i>Bacteria</i> |
| Otu0367 | 0.2                        | 0                              | 0.07               | 0.49                   | 0.07                 | 82.36                 | unclass. <i>Bacteroidetes</i>       | unclass. <i>Bacteroidetes</i>       | unclass. <i>Bacteroidetes</i>       | unclass. <i>Bacteroidetes</i>  | <i>Bacteroidetes</i>     | <i>Bacteria</i> |
| Otu0370 | 0.2                        | 0                              | 0.07               | 0.49                   | 0.07                 | 82.43                 | unclass. <i>Gammaproteobacteria</i> | unclass. <i>Gammaproteobacteria</i> | unclass. <i>Gammaproteobacteria</i> | <i>Gammaproteobacteria</i>     | <i>Proteobacteria</i>    | <i>Bacteria</i> |
| Otu0376 | 0.2                        | 0                              | 0.07               | 0.49                   | 0.07                 | 82.5                  | unclass. <i>Gammaproteobacteria</i> | unclass. <i>Gammaproteobacteria</i> | unclass. <i>Gammaproteobacteria</i> | <i>Gammaproteobacteria</i>     | <i>Proteobacteria</i>    | <i>Bacteria</i> |
| Otu0394 | 0.2                        | 0                              | 0.07               | 0.49                   | 0.07                 | 82.57                 | unclass. <i>Bacteria</i>            | unclass. <i>Bacteria</i>            | unclass. <i>Bacteria</i>            | unclass. <i>Bacteria</i>       | unclass. <i>Bacteria</i> | <i>Bacteria</i> |

| OTU     | Av.A <sub>i</sub><br>(no) | Av.A <sub>i</sub><br>(serial) | Av.δ <sub>i</sub> | Av.δ <sub>i</sub> /SD | Av.δ <sub>i</sub> % | ΣAv.δ <sub>i</sub> % | Genus                               | Family                              | Order                               | Class                          | Phylum                   | Domain          |
|---------|---------------------------|-------------------------------|-------------------|-----------------------|---------------------|----------------------|-------------------------------------|-------------------------------------|-------------------------------------|--------------------------------|--------------------------|-----------------|
| Otu0732 | 0.2                       | 0                             | 0.07              | 0.49                  | 0.07                | 82.64                | unclass. <i>Proteobacteria</i>      | unclass. <i>Proteobacteria</i>      | unclass. <i>Proteobacteria</i>      | unclass. <i>Proteobacteria</i> | <i>Proteobacteria</i>    | <i>Bacteria</i> |
| Otu0772 | 0.2                       | 0                             | 0.07              | 0.49                  | 0.07                | 82.72                | unclass. <i>Alphaproteobacteria</i> | unclass. <i>Alphaproteobacteria</i> | unclass. <i>Alphaproteobacteria</i> | <i>Alphaproteobacteria</i>     | <i>Proteobacteria</i>    | <i>Bacteria</i> |
| Otu0808 | 0.2                       | 0                             | 0.07              | 0.49                  | 0.07                | 82.79                | unclass. <i>Saprospiraceae</i>      | <i>Saprospiraceae</i>               | <i>Sphingobacteriales</i>           | <i>Sphingobacteria</i>         | <i>Bacteroidetes</i>     | <i>Bacteria</i> |
| Otu0892 | 0.2                       | 0                             | 0.07              | 0.49                  | 0.07                | 82.86                | unclass. <i>Bacteroidetes</i>       | unclass. <i>Bacteroidetes</i>       | unclass. <i>Bacteroidetes</i>       | unclass. <i>Bacteroidetes</i>  | <i>Bacteroidetes</i>     | <i>Bacteria</i> |
| Otu0933 | 0.2                       | 0                             | 0.07              | 0.49                  | 0.07                | 82.93                | <i>Haliae</i>                       | <i>Alteromonadaceae</i>             | <i>Alteromonadales</i>              | <i>Gammaproteobacteria</i>     | <i>Proteobacteria</i>    | <i>Bacteria</i> |
| Otu1001 | 0.2                       | 0                             | 0.07              | 0.49                  | 0.07                | 83                   | unclass. <i>Flavobacteriales</i>    | unclass. <i>Flavobacteriales</i>    | <i>Flavobacteriales</i>             | <i>Flavobacteria</i>           | <i>Bacteroidetes</i>     | <i>Bacteria</i> |
| Otu1127 | 0.2                       | 0                             | 0.07              | 0.49                  | 0.07                | 83.08                | unclass. <i>Flavobacteriales</i>    | unclass. <i>Flavobacteriales</i>    | <i>Flavobacteriales</i>             | <i>Flavobacteria</i>           | <i>Bacteroidetes</i>     | <i>Bacteria</i> |
| Otu1146 | 0.2                       | 0                             | 0.07              | 0.49                  | 0.07                | 83.15                | <i>Nitrospira</i>                   | <i>Nitrosomonadaceae</i>            | <i>Nitrosomonadales</i>             | <i>Betaproteobacteria</i>      | <i>Proteobacteria</i>    | <i>Bacteria</i> |
| Otu1170 | 0.2                       | 0                             | 0.07              | 0.49                  | 0.07                | 83.22                | unclass. <i>Bacteria</i>            | unclass. <i>Bacteria</i>            | unclass. <i>Bacteria</i>            | unclass. <i>Bacteria</i>       | unclass. <i>Bacteria</i> | <i>Bacteria</i> |
| Otu1195 | 0.2                       | 0                             | 0.07              | 0.49                  | 0.07                | 83.29                | unclass. <i>Bacteria</i>            | unclass. <i>Bacteria</i>            | unclass. <i>Bacteria</i>            | unclass. <i>Bacteria</i>       | unclass. <i>Bacteria</i> | <i>Bacteria</i> |
| Otu1198 | 0.2                       | 0                             | 0.07              | 0.49                  | 0.07                | 83.36                | unclass. <i>Gammaproteobacteria</i> | unclass. <i>Gammaproteobacteria</i> | unclass. <i>Gammaproteobacteria</i> | <i>Gammaproteobacteria</i>     | <i>Proteobacteria</i>    | <i>Bacteria</i> |
| Otu1237 | 0.2                       | 0                             | 0.07              | 0.49                  | 0.07                | 83.43                | unclass. <i>Gammaproteobacteria</i> | unclass. <i>Gammaproteobacteria</i> | unclass. <i>Gammaproteobacteria</i> | <i>Gammaproteobacteria</i>     | <i>Proteobacteria</i>    | <i>Bacteria</i> |
| Otu1286 | 0.2                       | 0                             | 0.07              | 0.49                  | 0.07                | 83.51                | unclass. <i>Gammaproteobacteria</i> | unclass. <i>Gammaproteobacteria</i> | unclass. <i>Gammaproteobacteria</i> | <i>Gammaproteobacteria</i>     | <i>Proteobacteria</i>    | <i>Bacteria</i> |
| Otu1318 | 0.2                       | 0                             | 0.07              | 0.49                  | 0.07                | 83.58                | unclass. <i>Bacteroidetes</i>       | unclass. <i>Bacteroidetes</i>       | unclass. <i>Bacteroidetes</i>       | unclass. <i>Bacteroidetes</i>  | <i>Bacteroidetes</i>     | <i>Bacteria</i> |
| Otu1319 | 0.2                       | 0                             | 0.07              | 0.49                  | 0.07                | 83.65                | unclass. <i>Gammaproteobacteria</i> | unclass. <i>Gammaproteobacteria</i> | unclass. <i>Gammaproteobacteria</i> | <i>Gammaproteobacteria</i>     | <i>Proteobacteria</i>    | <i>Bacteria</i> |
| Otu1320 | 0.2                       | 0                             | 0.07              | 0.49                  | 0.07                | 83.72                | unclass. <i>Bacteria</i>            | unclass. <i>Bacteria</i>            | unclass. <i>Bacteria</i>            | unclass. <i>Bacteria</i>       | unclass. <i>Bacteria</i> | <i>Bacteria</i> |
| Otu1321 | 0.2                       | 0                             | 0.07              | 0.49                  | 0.07                | 83.79                | unclass. <i>Flavobacteriaceae</i>   | <i>Flavobacteriaceae</i>            | <i>Flavobacteriales</i>             | <i>Flavobacteria</i>           | <i>Bacteroidetes</i>     | <i>Bacteria</i> |
| Otu1322 | 0.2                       | 0                             | 0.07              | 0.49                  | 0.07                | 83.87                | unclass. <i>Bacteria</i>            | unclass. <i>Bacteria</i>            | unclass. <i>Bacteria</i>            | unclass. <i>Bacteria</i>       | unclass. <i>Bacteria</i> | <i>Bacteria</i> |
| Otu1323 | 0.2                       | 0                             | 0.07              | 0.49                  | 0.07                | 83.94                | unclass. <i>Oceanospirillaceae</i>  | <i>Oceanospirillaceae</i>           | <i>Oceanospirillales</i>            | <i>Gammaproteobacteria</i>     | <i>Proteobacteria</i>    | <i>Bacteria</i> |
| Otu1324 | 0.2                       | 0                             | 0.07              | 0.49                  | 0.07                | 84.01                | unclass. <i>Alphaproteobacteria</i> | unclass. <i>Alphaproteobacteria</i> | unclass. <i>Alphaproteobacteria</i> | <i>Alphaproteobacteria</i>     | <i>Proteobacteria</i>    | <i>Bacteria</i> |
| Otu1325 | 0.2                       | 0                             | 0.07              | 0.49                  | 0.07                | 84.08                | <i>Algibacter</i>                   | <i>Flavobacteriaceae</i>            | <i>Flavobacteriales</i>             | <i>Flavobacteria</i>           | <i>Bacteroidetes</i>     | <i>Bacteria</i> |
| Otu1326 | 0.2                       | 0                             | 0.07              | 0.49                  | 0.07                | 84.15                | unclass. <i>Gammaproteobacteria</i> | unclass. <i>Gammaproteobacteria</i> | unclass. <i>Gammaproteobacteria</i> | <i>Gammaproteobacteria</i>     | <i>Proteobacteria</i>    | <i>Bacteria</i> |
| Otu1327 | 0.2                       | 0                             | 0.07              | 0.49                  | 0.07                | 84.23                | unclass. <i>Gammaproteobacteria</i> | unclass. <i>Gammaproteobacteria</i> | unclass. <i>Gammaproteobacteria</i> | <i>Gammaproteobacteria</i>     | <i>Proteobacteria</i>    | <i>Bacteria</i> |
| Otu1329 | 0.2                       | 0                             | 0.07              | 0.49                  | 0.07                | 84.3                 | unclass. <i>Gammaproteobacteria</i> | unclass. <i>Gammaproteobacteria</i> | unclass. <i>Gammaproteobacteria</i> | <i>Gammaproteobacteria</i>     | <i>Proteobacteria</i>    | <i>Bacteria</i> |
| Otu1330 | 0.2                       | 0                             | 0.07              | 0.49                  | 0.07                | 84.37                | unclass. <i>Bacteria</i>            | unclass. <i>Bacteria</i>            | unclass. <i>Bacteria</i>            | unclass. <i>Bacteria</i>       | unclass. <i>Bacteria</i> | <i>Bacteria</i> |
| Otu1331 | 0.2                       | 0                             | 0.07              | 0.49                  | 0.07                | 84.44                | unclass. <i>Saprospiraceae</i>      | <i>Saprospiraceae</i>               | <i>Sphingobacteriales</i>           | <i>Sphingobacteria</i>         | <i>Bacteroidetes</i>     | <i>Bacteria</i> |
| Otu1334 | 0.2                       | 0                             | 0.07              | 0.49                  | 0.07                | 84.51                | unclass. <i>Gammaproteobacteria</i> | unclass. <i>Gammaproteobacteria</i> | unclass. <i>Gammaproteobacteria</i> | <i>Gammaproteobacteria</i>     | <i>Proteobacteria</i>    | <i>Bacteria</i> |

| OTU     | Av. A <sub>i</sub><br>(no) | Av. A <sub>i</sub><br>(serial) | Av. δ <sub>i</sub> | Av. δ <sub>i</sub> /SD | Av. δ <sub>i</sub> % | ΣAv. δ <sub>i</sub> % | Genus                               | Family                              | Order                               | Class                          | Phylum                   | Domain          |
|---------|----------------------------|--------------------------------|--------------------|------------------------|----------------------|-----------------------|-------------------------------------|-------------------------------------|-------------------------------------|--------------------------------|--------------------------|-----------------|
| Otu1335 | 0.2                        | 0                              | 0.07               | 0.49                   | 0.07                 | 84.58                 | unclass. <i>Chromatiales</i>        | unclass. <i>Chromatiales</i>        | <i>Chromatiales</i>                 | <i>Gammaproteobacteria</i>     | <i>Proteobacteria</i>    | <i>Bacteria</i> |
| Otu1336 | 0.2                        | 0                              | 0.07               | 0.49                   | 0.07                 | 84.66                 | unclass. <i>Bacteria</i>            | unclass. <i>Bacteria</i>            | unclass. <i>Bacteria</i>            | unclass. <i>Bacteria</i>       | unclass. <i>Bacteria</i> | <i>Bacteria</i> |
| Otu1337 | 0.2                        | 0                              | 0.07               | 0.49                   | 0.07                 | 84.73                 | unclass. <i>Bacteria</i>            | unclass. <i>Bacteria</i>            | unclass. <i>Bacteria</i>            | unclass. <i>Bacteria</i>       | unclass. <i>Bacteria</i> | <i>Bacteria</i> |
| Otu1338 | 0.2                        | 0                              | 0.07               | 0.49                   | 0.07                 | 84.8                  | unclass. <i>Bacteroidetes</i>       | unclass. <i>Bacteroidetes</i>       | unclass. <i>Bacteroidetes</i>       | unclass. <i>Bacteroidetes</i>  | <i>Bacteroidetes</i>     | <i>Bacteria</i> |
| Otu1339 | 0.2                        | 0                              | 0.07               | 0.49                   | 0.07                 | 84.87                 | unclass. <i>Bacteria</i>            | unclass. <i>Bacteria</i>            | unclass. <i>Bacteria</i>            | unclass. <i>Bacteria</i>       | unclass. <i>Bacteria</i> | <i>Bacteria</i> |
| Otu1340 | 0.2                        | 0                              | 0.07               | 0.49                   | 0.07                 | 84.94                 | unclass. <i>Proteobacteria</i>      | unclass. <i>Proteobacteria</i>      | unclass. <i>Proteobacteria</i>      | unclass. <i>Proteobacteria</i> | <i>Proteobacteria</i>    | <i>Bacteria</i> |
| Otu1341 | 0.2                        | 0                              | 0.07               | 0.49                   | 0.07                 | 85.02                 | unclass. <i>Gammaproteobacteria</i> | unclass. <i>Gammaproteobacteria</i> | unclass. <i>Gammaproteobacteria</i> | <i>Gammaproteobacteria</i>     | <i>Proteobacteria</i>    | <i>Bacteria</i> |
| Otu1342 | 0.2                        | 0                              | 0.07               | 0.49                   | 0.07                 | 85.09                 | unclass. <i>Actinobacteria</i>      | unclass. <i>Actinobacteria</i>      | unclass. <i>Actinobacteria</i>      | <i>Actinobacteria</i>          | <i>Actinobacteria</i>    | <i>Bacteria</i> |
| Otu1344 | 0.2                        | 0                              | 0.07               | 0.49                   | 0.07                 | 85.16                 | unclass. <i>Gammaproteobacteria</i> | unclass. <i>Gammaproteobacteria</i> | unclass. <i>Gammaproteobacteria</i> | <i>Gammaproteobacteria</i>     | <i>Proteobacteria</i>    | <i>Bacteria</i> |
| Otu1345 | 0.2                        | 0                              | 0.07               | 0.49                   | 0.07                 | 85.23                 | unclass. <i>Bacteria</i>            | unclass. <i>Bacteria</i>            | unclass. <i>Bacteria</i>            | unclass. <i>Bacteria</i>       | unclass. <i>Bacteria</i> | <i>Bacteria</i> |
| Otu1346 | 0.2                        | 0                              | 0.07               | 0.49                   | 0.07                 | 85.3                  | unclass. <i>Planctomycetaceae</i>   | <i>Planctomycetaceae</i>            | <i>Planctomycetales</i>             | <i>Planctomycetacia</i>        | <i>Planctomycetes</i>    | <i>Bacteria</i> |
| Otu1347 | 0.2                        | 0                              | 0.07               | 0.49                   | 0.07                 | 85.37                 | unclass. <i>Gammaproteobacteria</i> | unclass. <i>Gammaproteobacteria</i> | unclass. <i>Gammaproteobacteria</i> | <i>Gammaproteobacteria</i>     | <i>Proteobacteria</i>    | <i>Bacteria</i> |
| Otu1349 | 0.2                        | 0                              | 0.07               | 0.49                   | 0.07                 | 85.45                 | unclass. <i>Bacteria</i>            | unclass. <i>Bacteria</i>            | unclass. <i>Bacteria</i>            | unclass. <i>Bacteria</i>       | unclass. <i>Bacteria</i> | <i>Bacteria</i> |
| Otu1066 | 0                          | 0.2                            | 0.07               | 0.49                   | 0.07                 | 85.52                 | unclass. <i>Bacteria</i>            | unclass. <i>Bacteria</i>            | unclass. <i>Bacteria</i>            | unclass. <i>Bacteria</i>       | unclass. <i>Bacteria</i> | <i>Bacteria</i> |
| Otu0538 | 0                          | 0.2                            | 0.07               | 0.49                   | 0.07                 | 85.59                 | <i>Oceaniserpentilla</i>            | <i>Oceanospirillaceae</i>           | <i>Oceanospirillales</i>            | <i>Gammaproteobacteria</i>     | <i>Proteobacteria</i>    | <i>Bacteria</i> |
| Otu0165 | 0                          | 0.2                            | 0.07               | 0.49                   | 0.07                 | 85.66                 | <i>Marinomonas</i>                  | <i>Oceanospirillaceae</i>           | <i>Oceanospirillales</i>            | <i>Gammaproteobacteria</i>     | <i>Proteobacteria</i>    | <i>Bacteria</i> |
| Otu0322 | 0                          | 0.2                            | 0.07               | 0.49                   | 0.07                 | 85.73                 | unclass. <i>Bacteria</i>            | unclass. <i>Bacteria</i>            | unclass. <i>Bacteria</i>            | unclass. <i>Bacteria</i>       | unclass. <i>Bacteria</i> | <i>Bacteria</i> |
| Otu1059 | 0                          | 0.2                            | 0.07               | 0.49                   | 0.07                 | 85.8                  | unclass. <i>Bacteria</i>            | unclass. <i>Bacteria</i>            | unclass. <i>Bacteria</i>            | unclass. <i>Bacteria</i>       | unclass. <i>Bacteria</i> | <i>Bacteria</i> |
| Otu1068 | 0                          | 0.2                            | 0.07               | 0.49                   | 0.07                 | 85.87                 | unclass. <i>Bacteria</i>            | unclass. <i>Bacteria</i>            | unclass. <i>Bacteria</i>            | unclass. <i>Bacteria</i>       | unclass. <i>Bacteria</i> | <i>Bacteria</i> |
| Otu0077 | 0.2                        | 0                              | 0.07               | 0.49                   | 0.07                 | 85.93                 | unclass. <i>Bacteria</i>            | unclass. <i>Bacteria</i>            | unclass. <i>Bacteria</i>            | unclass. <i>Bacteria</i>       | unclass. <i>Bacteria</i> | <i>Bacteria</i> |
| Otu0078 | 0.2                        | 0                              | 0.07               | 0.49                   | 0.07                 | 86                    | <i>Erythrobacter</i>                | <i>Erythrobacteraceae</i>           | <i>Sphingomonadales</i>             | <i>Alphaproteobacteria</i>     | <i>Proteobacteria</i>    | <i>Bacteria</i> |
| Otu0196 | 0.2                        | 0                              | 0.07               | 0.49                   | 0.07                 | 86.07                 | unclass. <i>Flavobacteriaceae</i>   | <i>Flavobacteriaceae</i>            | <i>Flavobacteriales</i>             | <i>Flavobacteria</i>           | <i>Bacteroidetes</i>     | <i>Bacteria</i> |
| Otu0239 | 0.2                        | 0                              | 0.07               | 0.49                   | 0.07                 | 86.14                 | unclass. <i>Gammaproteobacteria</i> | unclass. <i>Gammaproteobacteria</i> | unclass. <i>Gammaproteobacteria</i> | <i>Gammaproteobacteria</i>     | <i>Proteobacteria</i>    | <i>Bacteria</i> |
| Otu0297 | 0.2                        | 0                              | 0.07               | 0.49                   | 0.07                 | 86.21                 | <i>Lutibacter</i>                   | <i>Flavobacteriaceae</i>            | <i>Flavobacteriales</i>             | <i>Flavobacteria</i>           | <i>Bacteroidetes</i>     | <i>Bacteria</i> |
| Otu0304 | 0.2                        | 0                              | 0.07               | 0.49                   | 0.07                 | 86.27                 | unclass. <i>Bacteria</i>            | unclass. <i>Bacteria</i>            | unclass. <i>Bacteria</i>            | unclass. <i>Bacteria</i>       | unclass. <i>Bacteria</i> | <i>Bacteria</i> |
| Otu0316 | 0.2                        | 0                              | 0.07               | 0.49                   | 0.07                 | 86.34                 | unclass. <i>Bacteria</i>            | unclass. <i>Bacteria</i>            | unclass. <i>Bacteria</i>            | unclass. <i>Bacteria</i>       | unclass. <i>Bacteria</i> | <i>Bacteria</i> |
| Otu0332 | 0.2                        | 0                              | 0.07               | 0.49                   | 0.07                 | 86.41                 | unclass. <i>Gammaproteobacteria</i> | unclass. <i>Gammaproteobacteria</i> | unclass. <i>Gammaproteobacteria</i> | <i>Gammaproteobacteria</i>     | <i>Proteobacteria</i>    | <i>Bacteria</i> |

| OTU     | Av.A <sub>i</sub><br>(no) | Av.A <sub>i</sub><br>(serial) | Av.δ <sub>i</sub> | Av.δ <sub>i</sub> /SD | Av.δ <sub>i</sub> % | ΣAv.δ <sub>i</sub> % | Genus                               | Family                                | Order                               | Class                          | Phylum                   | Domain          |
|---------|---------------------------|-------------------------------|-------------------|-----------------------|---------------------|----------------------|-------------------------------------|---------------------------------------|-------------------------------------|--------------------------------|--------------------------|-----------------|
| Otu0342 | 0.2                       | 0                             | 0.07              | 0.49                  | 0.07                | 86.48                | unclass. <i>Gammaproteobacteria</i> | unclass. <i>Gammaproteobacteria</i>   | unclass. <i>Gammaproteobacteria</i> | <i>Gammaproteobacteria</i>     | <i>Proteobacteria</i>    | <i>Bacteria</i> |
| Otu0373 | 0.2                       | 0                             | 0.07              | 0.49                  | 0.07                | 86.54                | unclass. <i>Bacteria</i>            | unclass. <i>Bacteria</i>              | unclass. <i>Bacteria</i>            | unclass. <i>Bacteria</i>       | unclass. <i>Bacteria</i> | <i>Bacteria</i> |
| Otu0378 | 0.2                       | 0                             | 0.07              | 0.49                  | 0.07                | 86.61                | unclass. <i>Rickettsiaceae</i>      | <i>Rickettsiaceae</i>                 | <i>Rickettsiales</i>                | <i>Alphaproteobacteria</i>     | <i>Proteobacteria</i>    | <i>Bacteria</i> |
| Otu0403 | 0.2                       | 0                             | 0.07              | 0.49                  | 0.07                | 86.68                | unclass. <i>Acidobacteria_Gp10</i>  | unclass. <i>Acidobacteria_Gp10</i>    | unclass. <i>Acidobacteria_Gp10</i>  | <i>Acidobacteria_Gp10</i>      | <i>Acidobacteria</i>     | <i>Bacteria</i> |
| Otu0431 | 0.2                       | 0                             | 0.07              | 0.49                  | 0.07                | 86.75                | unclass. <i>Flammeovirgaceae</i>    | <i>Flammeovirgaceae</i>               | <i>Sphingobacteriales</i>           | <i>Sphingobacteria</i>         | <i>Bacteroidetes</i>     | <i>Bacteria</i> |
| Otu0491 | 0.2                       | 0                             | 0.07              | 0.49                  | 0.07                | 86.82                | unclass. <i>Flavobacteriales</i>    | unclass. <i>Flavobacteriales</i>      | <i>Flavobacteriales</i>             | <i>Flavobacteria</i>           | <i>Bacteroidetes</i>     | <i>Bacteria</i> |
| Otu0582 | 0.2                       | 0                             | 0.07              | 0.49                  | 0.07                | 86.88                | unclass. <i>Rhodobacteraceae</i>    | <i>Rhodobacteraceae</i>               | <i>Rhodobacterales</i>              | <i>Alphaproteobacteria</i>     | <i>Proteobacteria</i>    | <i>Bacteria</i> |
| Otu0651 | 0.2                       | 0                             | 0.07              | 0.49                  | 0.07                | 86.95                | <i>Arcobacter</i>                   | <i>Campylobacteraceae</i>             | <i>Campylobacterales</i>            | <i>Epsilonproteobacteria</i>   | <i>Proteobacteria</i>    | <i>Bacteria</i> |
| Otu0709 | 0.2                       | 0                             | 0.07              | 0.49                  | 0.07                | 87.02                | unclass. <i>Bacteria</i>            | unclass. <i>Bacteria</i>              | unclass. <i>Bacteria</i>            | unclass. <i>Bacteria</i>       | unclass. <i>Bacteria</i> | <i>Bacteria</i> |
| Otu0795 | 0.2                       | 0                             | 0.07              | 0.49                  | 0.07                | 87.09                | unclass. <i>Bacteria</i>            | unclass. <i>Bacteria</i>              | unclass. <i>Bacteria</i>            | unclass. <i>Bacteria</i>       | unclass. <i>Bacteria</i> | <i>Bacteria</i> |
| Otu0855 | 0.2                       | 0                             | 0.07              | 0.49                  | 0.07                | 87.16                | <i>Dasania</i>                      | <i>Pseudomonadales_incertae_sedis</i> | <i>Pseudomonadales</i>              | <i>Gammaproteobacteria</i>     | <i>Proteobacteria</i>    | <i>Bacteria</i> |
| Otu0936 | 0.2                       | 0                             | 0.07              | 0.49                  | 0.07                | 87.22                | unclass. <i>Gammaproteobacteria</i> | unclass. <i>Gammaproteobacteria</i>   | unclass. <i>Gammaproteobacteria</i> | <i>Gammaproteobacteria</i>     | <i>Proteobacteria</i>    | <i>Bacteria</i> |
| Otu0951 | 0.2                       | 0                             | 0.07              | 0.49                  | 0.07                | 87.29                | <i>Halieu</i>                       | <i>Alteromonadaceae</i>               | <i>Alteromonadales</i>              | <i>Gammaproteobacteria</i>     | <i>Proteobacteria</i>    | <i>Bacteria</i> |
| Otu1022 | 0.2                       | 0                             | 0.07              | 0.49                  | 0.07                | 87.36                | unclass. <i>Gammaproteobacteria</i> | unclass. <i>Gammaproteobacteria</i>   | unclass. <i>Gammaproteobacteria</i> | <i>Gammaproteobacteria</i>     | <i>Proteobacteria</i>    | <i>Bacteria</i> |
| Otu1120 | 0.2                       | 0                             | 0.07              | 0.49                  | 0.07                | 87.43                | unclass. <i>Bacteria</i>            | unclass. <i>Bacteria</i>              | unclass. <i>Bacteria</i>            | unclass. <i>Bacteria</i>       | unclass. <i>Bacteria</i> | <i>Bacteria</i> |
| Otu1132 | 0.2                       | 0                             | 0.07              | 0.49                  | 0.07                | 87.5                 | unclass. <i>Flavobacteriales</i>    | unclass. <i>Flavobacteriales</i>      | <i>Flavobacteriales</i>             | <i>Flavobacteria</i>           | <i>Bacteroidetes</i>     | <i>Bacteria</i> |
| Otu1163 | 0.2                       | 0                             | 0.07              | 0.49                  | 0.07                | 87.56                | unclass. <i>Bacteria</i>            | unclass. <i>Bacteria</i>              | unclass. <i>Bacteria</i>            | unclass. <i>Bacteria</i>       | unclass. <i>Bacteria</i> | <i>Bacteria</i> |
| Otu1177 | 0.2                       | 0                             | 0.07              | 0.49                  | 0.07                | 87.63                | unclass. <i>Erythrobacteraceae</i>  | <i>Erythrobacteraceae</i>             | <i>Sphingomonadales</i>             | <i>Alphaproteobacteria</i>     | <i>Proteobacteria</i>    | <i>Bacteria</i> |
| Otu1190 | 0.2                       | 0                             | 0.07              | 0.49                  | 0.07                | 87.7                 | unclass. <i>Gammaproteobacteria</i> | unclass. <i>Gammaproteobacteria</i>   | unclass. <i>Gammaproteobacteria</i> | <i>Gammaproteobacteria</i>     | <i>Proteobacteria</i>    | <i>Bacteria</i> |
| Otu1218 | 0.2                       | 0                             | 0.07              | 0.49                  | 0.07                | 87.77                | unclass. <i>Bacteria</i>            | unclass. <i>Bacteria</i>              | unclass. <i>Bacteria</i>            | unclass. <i>Bacteria</i>       | unclass. <i>Bacteria</i> | <i>Bacteria</i> |
| Otu1220 | 0.2                       | 0                             | 0.07              | 0.49                  | 0.07                | 87.84                | unclass. <i>Bacteria</i>            | unclass. <i>Bacteria</i>              | unclass. <i>Bacteria</i>            | unclass. <i>Bacteria</i>       | unclass. <i>Bacteria</i> | <i>Bacteria</i> |
| Otu1221 | 0.2                       | 0                             | 0.07              | 0.49                  | 0.07                | 87.9                 | unclass. <i>Flavobacteriales</i>    | unclass. <i>Flavobacteriales</i>      | <i>Flavobacteriales</i>             | <i>Flavobacteria</i>           | <i>Bacteroidetes</i>     | <i>Bacteria</i> |
| Otu1222 | 0.2                       | 0                             | 0.07              | 0.49                  | 0.07                | 87.97                | unclass. <i>Flavobacteriaceae</i>   | <i>Flavobacteriaceae</i>              | <i>Flavobacteriales</i>             | <i>Flavobacteria</i>           | <i>Bacteroidetes</i>     | <i>Bacteria</i> |
| Otu1225 | 0.2                       | 0                             | 0.07              | 0.49                  | 0.07                | 88.04                | unclass. <i>Proteobacteria</i>      | unclass. <i>Proteobacteria</i>        | unclass. <i>Proteobacteria</i>      | unclass. <i>Proteobacteria</i> | <i>Proteobacteria</i>    | <i>Bacteria</i> |
| Otu1227 | 0.2                       | 0                             | 0.07              | 0.49                  | 0.07                | 88.11                | unclass. <i>Bacteria</i>            | unclass. <i>Bacteria</i>              | unclass. <i>Bacteria</i>            | unclass. <i>Bacteria</i>       | unclass. <i>Bacteria</i> | <i>Bacteria</i> |
| Otu1230 | 0.2                       | 0                             | 0.07              | 0.49                  | 0.07                | 88.18                | unclass. <i>Bacteroidetes</i>       | unclass. <i>Bacteroidetes</i>         | unclass. <i>Bacteroidetes</i>       | unclass. <i>Bacteroidetes</i>  | <i>Bacteroidetes</i>     | <i>Bacteria</i> |
| Otu1232 | 0.2                       | 0                             | 0.07              | 0.49                  | 0.07                | 88.24                | <i>Halieu</i>                       | <i>Alteromonadaceae</i>               | <i>Alteromonadales</i>              | <i>Gammaproteobacteria</i>     | <i>Proteobacteria</i>    | <i>Bacteria</i> |

| OTU     | Av. A <sub>i</sub><br>(no) | Av. A <sub>i</sub><br>(serial) | Av. δ <sub>i</sub> | Av. δ <sub>i</sub> /SD | Av. δ <sub>i</sub> % | ΣAv. δ <sub>i</sub> % | Genus                               | Family                              | Order                               | Class                          | Phylum                   | Domain          |
|---------|----------------------------|--------------------------------|--------------------|------------------------|----------------------|-----------------------|-------------------------------------|-------------------------------------|-------------------------------------|--------------------------------|--------------------------|-----------------|
| Otu1239 | 0.2                        | 0                              | 0.07               | 0.49                   | 0.07                 | 88.31                 | <i>Sneathiella</i>                  | <i>Sneathiellaceae</i>              | <i>Sneathiellales</i>               | <i>Alphaproteobacteria</i>     | <i>Proteobacteria</i>    | <i>Bacteria</i> |
| Otu1240 | 0.2                        | 0                              | 0.07               | 0.49                   | 0.07                 | 88.38                 | unclass. <i>Gammaproteobacteria</i> | unclass. <i>Gammaproteobacteria</i> | unclass. <i>Gammaproteobacteria</i> | <i>Gammaproteobacteria</i>     | <i>Proteobacteria</i>    | <i>Bacteria</i> |
| Otu1241 | 0.2                        | 0                              | 0.07               | 0.49                   | 0.07                 | 88.45                 | unclass. <i>Gammaproteobacteria</i> | unclass. <i>Gammaproteobacteria</i> | unclass. <i>Gammaproteobacteria</i> | <i>Gammaproteobacteria</i>     | <i>Proteobacteria</i>    | <i>Bacteria</i> |
| Otu1243 | 0.2                        | 0                              | 0.07               | 0.49                   | 0.07                 | 88.52                 | unclass. <i>Bacteria</i>            | unclass. <i>Bacteria</i>            | unclass. <i>Bacteria</i>            | unclass. <i>Bacteria</i>       | unclass. <i>Bacteria</i> | <i>Bacteria</i> |
| Otu1244 | 0.2                        | 0                              | 0.07               | 0.49                   | 0.07                 | 88.58                 | unclass. <i>Bacteria</i>            | unclass. <i>Bacteria</i>            | unclass. <i>Bacteria</i>            | unclass. <i>Bacteria</i>       | unclass. <i>Bacteria</i> | <i>Bacteria</i> |
| Otu1246 | 0.2                        | 0                              | 0.07               | 0.49                   | 0.07                 | 88.65                 | unclass. <i>Gammaproteobacteria</i> | unclass. <i>Gammaproteobacteria</i> | unclass. <i>Gammaproteobacteria</i> | <i>Gammaproteobacteria</i>     | <i>Proteobacteria</i>    | <i>Bacteria</i> |
| Otu1248 | 0.2                        | 0                              | 0.07               | 0.49                   | 0.07                 | 88.72                 | unclass. <i>Bacteria</i>            | unclass. <i>Bacteria</i>            | unclass. <i>Bacteria</i>            | unclass. <i>Bacteria</i>       | unclass. <i>Bacteria</i> | <i>Bacteria</i> |
| Otu1250 | 0.2                        | 0                              | 0.07               | 0.49                   | 0.07                 | 88.79                 | unclass. <i>Bacteria</i>            | unclass. <i>Bacteria</i>            | unclass. <i>Bacteria</i>            | unclass. <i>Bacteria</i>       | unclass. <i>Bacteria</i> | <i>Bacteria</i> |
| Otu1251 | 0.2                        | 0                              | 0.07               | 0.49                   | 0.07                 | 88.86                 | unclass. <i>Bacteria</i>            | unclass. <i>Bacteria</i>            | unclass. <i>Bacteria</i>            | unclass. <i>Bacteria</i>       | unclass. <i>Bacteria</i> | <i>Bacteria</i> |
| Otu1252 | 0.2                        | 0                              | 0.07               | 0.49                   | 0.07                 | 88.92                 | unclass. <i>Flavobacteriaceae</i>   | <i>Flavobacteriaceae</i>            | <i>Flavobacteriales</i>             | <i>Flavobacteria</i>           | <i>Bacteroidetes</i>     | <i>Bacteria</i> |
| Otu1253 | 0.2                        | 0                              | 0.07               | 0.49                   | 0.07                 | 88.99                 | unclass. <i>Proteobacteria</i>      | unclass. <i>Proteobacteria</i>      | unclass. <i>Proteobacteria</i>      | unclass. <i>Proteobacteria</i> | <i>Proteobacteria</i>    | <i>Bacteria</i> |
| Otu1254 | 0.2                        | 0                              | 0.07               | 0.49                   | 0.07                 | 89.06                 | unclass. <i>Gammaproteobacteria</i> | unclass. <i>Gammaproteobacteria</i> | unclass. <i>Gammaproteobacteria</i> | <i>Gammaproteobacteria</i>     | <i>Proteobacteria</i>    | <i>Bacteria</i> |
| Otu1257 | 0.2                        | 0                              | 0.07               | 0.49                   | 0.07                 | 89.13                 | unclass. <i>Gammaproteobacteria</i> | unclass. <i>Gammaproteobacteria</i> | unclass. <i>Gammaproteobacteria</i> | <i>Gammaproteobacteria</i>     | <i>Proteobacteria</i>    | <i>Bacteria</i> |
| Otu1258 | 0.2                        | 0                              | 0.07               | 0.49                   | 0.07                 | 89.19                 | <i>Amphritea</i>                    | <i>Oceanospirillaceae</i>           | <i>Oceanospirillales</i>            | <i>Gammaproteobacteria</i>     | <i>Proteobacteria</i>    | <i>Bacteria</i> |
| Otu1259 | 0.2                        | 0                              | 0.07               | 0.49                   | 0.07                 | 89.26                 | unclass. <i>Nannocystaceae</i>      | <i>Nannocystaceae</i>               | <i>Myxococcales</i>                 | <i>Deltaproteobacteria</i>     | <i>Proteobacteria</i>    | <i>Bacteria</i> |
| Otu1260 | 0.2                        | 0                              | 0.07               | 0.49                   | 0.07                 | 89.33                 | <i>Marinobacterium</i>              | <i>Alteromonadaceae</i>             | <i>Alteromonadales</i>              | <i>Gammaproteobacteria</i>     | <i>Proteobacteria</i>    | <i>Bacteria</i> |
| Otu1261 | 0.2                        | 0                              | 0.07               | 0.49                   | 0.07                 | 89.4                  | unclass. <i>Gammaproteobacteria</i> | unclass. <i>Gammaproteobacteria</i> | unclass. <i>Gammaproteobacteria</i> | <i>Gammaproteobacteria</i>     | <i>Proteobacteria</i>    | <i>Bacteria</i> |
| Otu1262 | 0.2                        | 0                              | 0.07               | 0.49                   | 0.07                 | 89.47                 | unclass. <i>Bacteroidetes</i>       | unclass. <i>Bacteroidetes</i>       | unclass. <i>Bacteroidetes</i>       | unclass. <i>Bacteroidetes</i>  | <i>Bacteroidetes</i>     | <i>Bacteria</i> |
| Otu1263 | 0.2                        | 0                              | 0.07               | 0.49                   | 0.07                 | 89.53                 | unclass. <i>Gammaproteobacteria</i> | unclass. <i>Gammaproteobacteria</i> | unclass. <i>Gammaproteobacteria</i> | <i>Gammaproteobacteria</i>     | <i>Proteobacteria</i>    | <i>Bacteria</i> |
| Otu1264 | 0.2                        | 0                              | 0.07               | 0.49                   | 0.07                 | 89.6                  | unclass. <i>Bacteria</i>            | unclass. <i>Bacteria</i>            | unclass. <i>Bacteria</i>            | unclass. <i>Bacteria</i>       | unclass. <i>Bacteria</i> | <i>Bacteria</i> |
| Otu1265 | 0.2                        | 0                              | 0.07               | 0.49                   | 0.07                 | 89.67                 | unclass. <i>Bacteria</i>            | unclass. <i>Bacteria</i>            | unclass. <i>Bacteria</i>            | unclass. <i>Bacteria</i>       | unclass. <i>Bacteria</i> | <i>Bacteria</i> |
| Otu1266 | 0.2                        | 0                              | 0.07               | 0.49                   | 0.07                 | 89.74                 | unclass. <i>Gammaproteobacteria</i> | unclass. <i>Gammaproteobacteria</i> | unclass. <i>Gammaproteobacteria</i> | <i>Gammaproteobacteria</i>     | <i>Proteobacteria</i>    | <i>Bacteria</i> |
| Otu1269 | 0.2                        | 0                              | 0.07               | 0.49                   | 0.07                 | 89.81                 | unclass. <i>Bacteria</i>            | unclass. <i>Bacteria</i>            | unclass. <i>Bacteria</i>            | unclass. <i>Bacteria</i>       | unclass. <i>Bacteria</i> | <i>Bacteria</i> |
| Otu1271 | 0.2                        | 0                              | 0.07               | 0.49                   | 0.07                 | 89.87                 | unclass. <i>Alteromonadales</i>     | unclass. <i>Alteromonadales</i>     | <i>Alteromonadales</i>              | <i>Gammaproteobacteria</i>     | <i>Proteobacteria</i>    | <i>Bacteria</i> |
| Otu1272 | 0.2                        | 0                              | 0.07               | 0.49                   | 0.07                 | 89.94                 | unclass. <i>Bacteria</i>            | unclass. <i>Bacteria</i>            | unclass. <i>Bacteria</i>            | unclass. <i>Bacteria</i>       | unclass. <i>Bacteria</i> | <i>Bacteria</i> |
| Otu1275 | 0.2                        | 0                              | 0.07               | 0.49                   | 0.07                 | 90.01                 | unclass. <i>Flavobacteriaceae</i>   | <i>Flavobacteriaceae</i>            | <i>Flavobacteriales</i>             | <i>Flavobacteria</i>           | <i>Bacteroidetes</i>     | <i>Bacteria</i> |

Winter pH *in situ* 'no dilution' vs. 'serial dilution' (average dissimilarity: 92.4%)

| OTU     | Av.A <sub>i</sub><br>(no) | Av.A <sub>i</sub><br>(serial) | Av.δ <sub>i</sub> | Av.δ <sub>i</sub> /SD | Av.δ <sub>i</sub> % | ΣAv.δ <sub>i</sub> % | Genus                               | Family                              | Order                               | Class                      | Phylum                   | Domain          |
|---------|---------------------------|-------------------------------|-------------------|-----------------------|---------------------|----------------------|-------------------------------------|-------------------------------------|-------------------------------------|----------------------------|--------------------------|-----------------|
| Otu0106 | 0                         | 12.27                         | 4.36              | 6.29                  | 4.72                | 4.72                 | <i>Marinomonas</i>                  | <i>Oceanospirillaceae</i>           | <i>Oceanospirillales</i>            | <i>Gammaproteobacteria</i> | <i>Proteobacteria</i>    | <i>Bacteria</i> |
| Otu0132 | 0                         | 8.64                          | 3.07              | 4.38                  | 3.32                | 8.04                 | unclass. <i>Alteromonadales</i>     | unclass. <i>Alteromonadales</i>     | <i>Alteromonadales</i>              | <i>Gammaproteobacteria</i> | <i>Proteobacteria</i>    | <i>Bacteria</i> |
| Otu0010 | 7.33                      | 0.97                          | 2.26              | 6.92                  | 2.45                | 10.49                | unclass. <i>Flavobacteriaceae</i>   | <i>Flavobacteriaceae</i>            | <i>Flavobacteriales</i>             | <i>Flavobacteria</i>       | <i>Bacteroidetes</i>     | <i>Bacteria</i> |
| Otu0055 | 3.73                      | 9.17                          | 2.14              | 2.23                  | 2.32                | 12.8                 | <i>Colwellia</i>                    | <i>Colwelliaceae</i>                | <i>Alteromonadales</i>              | <i>Gammaproteobacteria</i> | <i>Proteobacteria</i>    | <i>Bacteria</i> |
| Otu0123 | 0                         | 5.62                          | 2                 | 1.74                  | 2.17                | 14.97                | unclass. <i>Gammaproteobacteria</i> | unclass. <i>Gammaproteobacteria</i> | unclass. <i>Gammaproteobacteria</i> | <i>Gammaproteobacteria</i> | <i>Proteobacteria</i>    | <i>Bacteria</i> |
| Otu1815 | 5.57                      | 0                             | 1.98              | 4.08                  | 2.14                | 17.11                | unclass. <i>Flavobacteriales</i>    | unclass. <i>Flavobacteriales</i>    | <i>Flavobacteriales</i>             | <i>Flavobacteria</i>       | <i>Bacteroidetes</i>     | <i>Bacteria</i> |
| Otu1777 | 0                         | 5.49                          | 1.95              | 5.16                  | 2.11                | 19.22                | <i>Oceaniserpentilla</i>            | <i>Oceanospirillaceae</i>           | <i>Oceanospirillales</i>            | <i>Gammaproteobacteria</i> | <i>Proteobacteria</i>    | <i>Bacteria</i> |
| Otu0041 | 4.85                      | 0.2                           | 1.66              | 3.24                  | 1.8                 | 21.01                | <i>Sulfitobacter</i>                | <i>Rhodobacteraceae</i>             | <i>Rhodobacterales</i>              | <i>Alphaproteobacteria</i> | <i>Proteobacteria</i>    | <i>Bacteria</i> |
| Otu0134 | 4.57                      | 0                             | 1.62              | 5.26                  | 1.75                | 22.77                | unclass. <i>Gammaproteobacteria</i> | unclass. <i>Gammaproteobacteria</i> | unclass. <i>Gammaproteobacteria</i> | <i>Gammaproteobacteria</i> | <i>Proteobacteria</i>    | <i>Bacteria</i> |
| Otu1283 | 4.37                      | 0                             | 1.55              | 3.99                  | 1.68                | 24.45                | <i>Croceibacter</i>                 | <i>Flavobacteriaceae</i>            | <i>Flavobacteriales</i>             | <i>Flavobacteria</i>       | <i>Bacteroidetes</i>     | <i>Bacteria</i> |
| Otu0471 | 0                         | 4.28                          | 1.52              | 2.93                  | 1.64                | 26.09                | <i>Oceaniserpentilla</i>            | <i>Oceanospirillaceae</i>           | <i>Oceanospirillales</i>            | <i>Gammaproteobacteria</i> | <i>Proteobacteria</i>    | <i>Bacteria</i> |
| Otu0139 | 4.22                      | 0                             | 1.51              | 1.75                  | 1.63                | 27.72                | unclass. <i>Gammaproteobacteria</i> | unclass. <i>Gammaproteobacteria</i> | unclass. <i>Gammaproteobacteria</i> | <i>Gammaproteobacteria</i> | <i>Proteobacteria</i>    | <i>Bacteria</i> |
| Otu0236 | 4.16                      | 0                             | 1.47              | 9.37                  | 1.6                 | 29.32                | unclass. <i>Gammaproteobacteria</i> | unclass. <i>Gammaproteobacteria</i> | unclass. <i>Gammaproteobacteria</i> | <i>Gammaproteobacteria</i> | <i>Proteobacteria</i>    | <i>Bacteria</i> |
| Otu0068 | 3.4                       | 0                             | 1.21              | 4.31                  | 1.31                | 30.62                | <i>Pelagibacter</i>                 | SAR11-clade                         | <i>Rickettsiales</i>                | <i>Alphaproteobacteria</i> | <i>Proteobacteria</i>    | <i>Bacteria</i> |
| Otu1694 | 2.94                      | 0                             | 1.04              | 2.91                  | 1.13                | 31.75                | unclass. <i>Flavobacteriales</i>    | unclass. <i>Flavobacteriales</i>    | <i>Flavobacteriales</i>             | <i>Flavobacteria</i>       | <i>Bacteroidetes</i>     | <i>Bacteria</i> |
| Otu0160 | 3.51                      | 5.46                          | 0.93              | 1.46                  | 1.01                | 32.76                | <i>Colwellia</i>                    | <i>Colwelliaceae</i>                | <i>Alteromonadales</i>              | <i>Gammaproteobacteria</i> | <i>Proteobacteria</i>    | <i>Bacteria</i> |
| Otu0047 | 2.51                      | 0                             | 0.9               | 3.23                  | 0.97                | 33.73                | unclass. <i>Rhodobacteraceae</i>    | <i>Rhodobacteraceae</i>             | <i>Rhodobacterales</i>              | <i>Alphaproteobacteria</i> | <i>Proteobacteria</i>    | <i>Bacteria</i> |
| Otu1822 | 2.52                      | 0                             | 0.89              | 3.21                  | 0.97                | 34.7                 | unclass. <i>Flavobacteriales</i>    | unclass. <i>Flavobacteriales</i>    | <i>Flavobacteriales</i>             | <i>Flavobacteria</i>       | <i>Bacteroidetes</i>     | <i>Bacteria</i> |
| Otu0005 | 2.51                      | 0                             | 0.89              | 2.98                  | 0.96                | 35.66                | <i>Pelagibacter</i>                 | SAR11-clade                         | <i>Rickettsiales</i>                | <i>Alphaproteobacteria</i> | <i>Proteobacteria</i>    | <i>Bacteria</i> |
| Otu0409 | 2.38                      | 0                             | 0.83              | 0.66                  | 0.9                 | 36.56                | unclass. <i>Flavobacteriales</i>    | unclass. <i>Flavobacteriales</i>    | <i>Flavobacteriales</i>             | <i>Flavobacteria</i>       | <i>Bacteroidetes</i>     | <i>Bacteria</i> |
| Otu0572 | 2.33                      | 0                             | 0.82              | 1.11                  | 0.89                | 37.45                | <i>Croceibacter</i>                 | <i>Flavobacteriaceae</i>            | <i>Flavobacteriales</i>             | <i>Flavobacteria</i>       | <i>Bacteroidetes</i>     | <i>Bacteria</i> |
| Otu0571 | 0                         | 1.95                          | 0.69              | 4.28                  | 0.75                | 38.2                 | <i>Marinomonas</i>                  | <i>Oceanospirillaceae</i>           | <i>Oceanospirillales</i>            | <i>Gammaproteobacteria</i> | <i>Proteobacteria</i>    | <i>Bacteria</i> |
| Otu0164 | 1.94                      | 0                             | 0.69              | 3.76                  | 0.75                | 38.94                | <i>Croceibacter</i>                 | <i>Flavobacteriaceae</i>            | <i>Flavobacteriales</i>             | <i>Flavobacteria</i>       | <i>Bacteroidetes</i>     | <i>Bacteria</i> |
| Otu0113 | 1.91                      | 0                             | 0.69              | 1.58                  | 0.74                | 39.68                | <i>Colwellia</i>                    | <i>Colwelliaceae</i>                | <i>Alteromonadales</i>              | <i>Gammaproteobacteria</i> | <i>Proteobacteria</i>    | <i>Bacteria</i> |
| Otu0469 | 1.92                      | 0                             | 0.68              | 5.49                  | 0.74                | 40.42                | unclass. <i>Bacteria</i>            | unclass. <i>Bacteria</i>            | unclass. <i>Bacteria</i>            | unclass. <i>Bacteria</i>   | unclass. <i>Bacteria</i> | <i>Bacteria</i> |
| Otu0001 | 1.91                      | 0                             | 0.68              | 3.07                  | 0.73                | 41.15                | unclass. <i>Flavobacteriaceae</i>   | <i>Flavobacteriaceae</i>            | <i>Flavobacteriales</i>             | <i>Flavobacteria</i>       | <i>Bacteroidetes</i>     | <i>Bacteria</i> |
| Otu1720 | 1.86                      | 0                             | 0.66              | 2.91                  | 0.72                | 41.87                | unclass. <i>Bacteria</i>            | unclass. <i>Bacteria</i>            | unclass. <i>Bacteria</i>            | unclass. <i>Bacteria</i>   | unclass. <i>Bacteria</i> | <i>Bacteria</i> |



| OTU     | Av.A <sub>i</sub><br>(no) | Av.A <sub>i</sub><br>(serial) | Av.δ <sub>i</sub> | Av.δ <sub>i</sub> /SD | Av.δ <sub>i</sub> % | ΣAv.δ <sub>i</sub> % | Genus                               | Family                              | Order                               | Class                         | Phylum                | Domain          |
|---------|---------------------------|-------------------------------|-------------------|-----------------------|---------------------|----------------------|-------------------------------------|-------------------------------------|-------------------------------------|-------------------------------|-----------------------|-----------------|
| Otu0163 | 1.87                      | 0                             | 0.66              | 3.43                  | 0.71                | 42.59                | unclass. <i>Gammaproteobacteria</i> | unclass. <i>Gammaproteobacteria</i> | unclass. <i>Gammaproteobacteria</i> | <i>Gammaproteobacteria</i>    | <i>Proteobacteria</i> | <i>Bacteria</i> |
| Otu0032 | 1.79                      | 0                             | 0.64              | 4.25                  | 0.69                | 43.27                | unclass. <i>Gammaproteobacteria</i> | unclass. <i>Gammaproteobacteria</i> | unclass. <i>Gammaproteobacteria</i> | <i>Gammaproteobacteria</i>    | <i>Proteobacteria</i> | <i>Bacteria</i> |
| Otu0157 | 1.75                      | 0                             | 0.62              | 4.82                  | 0.67                | 43.94                | unclass. <i>Gammaproteobacteria</i> | unclass. <i>Gammaproteobacteria</i> | unclass. <i>Gammaproteobacteria</i> | <i>Gammaproteobacteria</i>    | <i>Proteobacteria</i> | <i>Bacteria</i> |
| Otu0122 | 1.58                      | 0                             | 0.56              | 1.62                  | 0.61                | 44.55                | <i>Glaciecola</i>                   | <i>Alteromonadaceae</i>             | <i>Alteromonadales</i>              | <i>Gammaproteobacteria</i>    | <i>Proteobacteria</i> | <i>Bacteria</i> |
| Otu1146 | 1.58                      | 0                             | 0.56              | 4.72                  | 0.6                 | 45.15                | <i>Nitrosospira</i>                 | <i>Nitrosomonadaceae</i>            | <i>Nitrosomonadales</i>             | <i>Betaproteobacteria</i>     | <i>Proteobacteria</i> | <i>Bacteria</i> |
| Otu0270 | 1.55                      | 0                             | 0.55              | 3.41                  | 0.59                | 45.75                | unclass. <i>Bacteroidetes</i>       | unclass. <i>Bacteroidetes</i>       | unclass. <i>Bacteroidetes</i>       | unclass. <i>Bacteroidetes</i> | <i>Bacteroidetes</i>  | <i>Bacteria</i> |
| Otu0209 | 0                         | 1.54                          | 0.54              | 2.33                  | 0.59                | 46.33                | unclass. <i>Oceanospirillales</i>   | unclass. <i>Oceanospirillales</i>   | <i>Oceanospirillales</i>            | <i>Gammaproteobacteria</i>    | <i>Proteobacteria</i> | <i>Bacteria</i> |
| Otu0124 | 1.51                      | 0                             | 0.54              | 4.37                  | 0.58                | 46.92                | <i>Loktanella</i>                   | <i>Rhodobacteraceae</i>             | <i>Rhodobacterales</i>              | <i>Alphaproteobacteria</i>    | <i>Proteobacteria</i> | <i>Bacteria</i> |
| Otu0261 | 1.51                      | 0                             | 0.53              | 1.57                  | 0.58                | 47.49                | <i>Winogradskyella</i>              | <i>Flavobacteriaceae</i>            | <i>Flavobacteriales</i>             | <i>Flavobacteria</i>          | <i>Bacteroidetes</i>  | <i>Bacteria</i> |
| Otu0012 | 1.49                      | 0                             | 0.53              | 2.42                  | 0.57                | 48.07                | unclass. <i>Comamonadaceae</i>      | <i>Comamonadaceae</i>               | <i>Burkholderiales</i>              | <i>Betaproteobacteria</i>     | <i>Proteobacteria</i> | <i>Bacteria</i> |
| Otu0035 | 1.78                      | 2.68                          | 0.52              | 0.98                  | 0.56                | 48.63                | <i>Colwellia</i>                    | <i>Colwelliaceae</i>                | <i>Alteromonadales</i>              | <i>Gammaproteobacteria</i>    | <i>Proteobacteria</i> | <i>Bacteria</i> |
| Otu0076 | 1.63                      | 0.2                           | 0.51              | 2.52                  | 0.55                | 49.18                | unclass. <i>Flammeovirgaceae</i>    | <i>Flammeovirgaceae</i>             | <i>Sphingobacteriales</i>           | <i>Sphingobacteria</i>        | <i>Bacteroidetes</i>  | <i>Bacteria</i> |
| Otu0052 | 1.38                      | 0                             | 0.5               | 1.19                  | 0.54                | 49.71                | unclass. <i>Betaproteobacteria</i>  | unclass. <i>Betaproteobacteria</i>  | unclass. <i>Betaproteobacteria</i>  | <i>Betaproteobacteria</i>     | <i>Proteobacteria</i> | <i>Bacteria</i> |
| Otu0056 | 1.39                      | 0                             | 0.49              | 6.26                  | 0.53                | 50.25                | unclass. <i>Gammaproteobacteria</i> | unclass. <i>Gammaproteobacteria</i> | unclass. <i>Gammaproteobacteria</i> | <i>Gammaproteobacteria</i>    | <i>Proteobacteria</i> | <i>Bacteria</i> |
| Otu0022 | 1.34                      | 0                             | 0.48              | 1.43                  | 0.52                | 50.77                | unclass. <i>Betaproteobacteria</i>  | unclass. <i>Betaproteobacteria</i>  | unclass. <i>Betaproteobacteria</i>  | <i>Betaproteobacteria</i>     | <i>Proteobacteria</i> | <i>Bacteria</i> |
| Otu0044 | 1.35                      | 0                             | 0.48              | 3.13                  | 0.52                | 51.29                | unclass. <i>Gammaproteobacteria</i> | unclass. <i>Gammaproteobacteria</i> | unclass. <i>Gammaproteobacteria</i> | <i>Gammaproteobacteria</i>    | <i>Proteobacteria</i> | <i>Bacteria</i> |
| Otu0143 | 1.28                      | 0                             | 0.46              | 1.64                  | 0.49                | 51.78                | unclass. <i>Gammaproteobacteria</i> | unclass. <i>Gammaproteobacteria</i> | unclass. <i>Gammaproteobacteria</i> | <i>Gammaproteobacteria</i>    | <i>Proteobacteria</i> | <i>Bacteria</i> |
| Otu0291 | 1.23                      | 0                             | 0.43              | 4.25                  | 0.47                | 52.25                | unclass. <i>Flavobacteriaceae</i>   | <i>Flavobacteriaceae</i>            | <i>Flavobacteriales</i>             | <i>Flavobacteria</i>          | <i>Bacteroidetes</i>  | <i>Bacteria</i> |
| Otu0177 | 1.17                      | 0                             | 0.41              | 5.17                  | 0.45                | 52.7                 | <i>Haliea</i>                       | <i>Alteromonadaceae</i>             | <i>Alteromonadales</i>              | <i>Gammaproteobacteria</i>    | <i>Proteobacteria</i> | <i>Bacteria</i> |
| Otu0262 | 1.17                      | 0                             | 0.41              | 5.8                   | 0.45                | 53.15                | unclass. <i>Gammaproteobacteria</i> | unclass. <i>Gammaproteobacteria</i> | unclass. <i>Gammaproteobacteria</i> | <i>Gammaproteobacteria</i>    | <i>Proteobacteria</i> | <i>Bacteria</i> |
| Otu0268 | 1.15                      | 0                             | 0.41              | 1.57                  | 0.44                | 53.59                | unclass. <i>Flavobacteriaceae</i>   | <i>Flavobacteriaceae</i>            | <i>Flavobacteriales</i>             | <i>Flavobacteria</i>          | <i>Bacteroidetes</i>  | <i>Bacteria</i> |
| Otu0002 | 1.11                      | 0                             | 0.4               | 1.77                  | 0.43                | 54.02                | unclass. <i>Flavobacteriaceae</i>   | <i>Flavobacteriaceae</i>            | <i>Flavobacteriales</i>             | <i>Flavobacteria</i>          | <i>Bacteroidetes</i>  | <i>Bacteria</i> |
| Otu0013 | 1.09                      | 0                             | 0.39              | 1.2                   | 0.42                | 54.44                | unclass. <i>Flavobacteriaceae</i>   | <i>Flavobacteriaceae</i>            | <i>Flavobacteriales</i>             | <i>Flavobacteria</i>          | <i>Bacteroidetes</i>  | <i>Bacteria</i> |
| Otu1781 | 0                         | 1.09                          | 0.39              | 1.68                  | 0.42                | 54.86                | <i>Oceaniserpentilla</i>            | <i>Oceanospirillaceae</i>           | <i>Oceanospirillales</i>            | <i>Gammaproteobacteria</i>    | <i>Proteobacteria</i> | <i>Bacteria</i> |
| Otu0366 | 1.09                      | 0                             | 0.38              | 1.69                  | 0.41                | 55.28                | unclass. <i>Saprospiraceae</i>      | <i>Saprospiraceae</i>               | <i>Sphingobacteriales</i>           | <i>Sphingobacteria</i>        | <i>Bacteroidetes</i>  | <i>Bacteria</i> |
| Otu1723 | 1.08                      | 0                             | 0.38              | 1.63                  | 0.41                | 55.69                | unclass. <i>Bacteroidetes</i>       | unclass. <i>Bacteroidetes</i>       | unclass. <i>Bacteroidetes</i>       | unclass. <i>Bacteroidetes</i> | <i>Bacteroidetes</i>  | <i>Bacteria</i> |
| Otu0118 | 1.04                      | 0                             | 0.36              | 1.06                  | 0.39                | 56.08                | <i>Colwellia</i>                    | <i>Colwelliaceae</i>                | <i>Alteromonadales</i>              | <i>Gammaproteobacteria</i>    | <i>Proteobacteria</i> | <i>Bacteria</i> |

| OTU     | Av.A <sub>i</sub><br>(no) | Av.A <sub>i</sub><br>(serial) | Av.δ <sub>i</sub> | Av.δ <sub>i</sub> /SD | Av.δ <sub>i</sub> % | ΣAv.δ <sub>i</sub> % | Genus                               | Family                              | Order                               | Class                         | Phylum                   | Domain          |
|---------|---------------------------|-------------------------------|-------------------|-----------------------|---------------------|----------------------|-------------------------------------|-------------------------------------|-------------------------------------|-------------------------------|--------------------------|-----------------|
| Otu0269 | 0.99                      | 0                             | 0.35              | 1.08                  | 0.38                | 56.45                | unclass. <i>Gammaproteobacteria</i> | unclass. <i>Gammaproteobacteria</i> | unclass. <i>Gammaproteobacteria</i> | <i>Gammaproteobacteria</i>    | <i>Proteobacteria</i>    | <i>Bacteria</i> |
| Otu0009 | 0.97                      | 0                             | 0.35              | 1.81                  | 0.37                | 56.83                | unclass. <i>Rhodobacteraceae</i>    | <i>Rhodobacteraceae</i>             | <i>Rhodobacterales</i>              | <i>Alphaproteobacteria</i>    | <i>Proteobacteria</i>    | <i>Bacteria</i> |
| Otu0062 | 0.95                      | 0                             | 0.34              | 1.09                  | 0.37                | 57.2                 | <i>Haliea</i>                       | <i>Alteromonadaceae</i>             | <i>Alteromonadales</i>              | <i>Gammaproteobacteria</i>    | <i>Proteobacteria</i>    | <i>Bacteria</i> |
| Otu0133 | 0.97                      | 0                             | 0.34              | 1.82                  | 0.37                | 57.56                | <i>Colwellia</i>                    | <i>Colwelliaceae</i>                | <i>Alteromonadales</i>              | <i>Gammaproteobacteria</i>    | <i>Proteobacteria</i>    | <i>Bacteria</i> |
| Otu0046 | 0.95                      | 0                             | 0.33              | 1.69                  | 0.36                | 57.92                | unclass. <i>Flavobacteriaceae</i>   | <i>Flavobacteriaceae</i>            | <i>Flavobacteriales</i>             | <i>Flavobacteria</i>          | <i>Bacteroidetes</i>     | <i>Bacteria</i> |
| Otu0542 | 0                         | 0.91                          | 0.32              | 1.18                  | 0.35                | 58.27                | unclass. <i>Oceanospirillaceae</i>  | <i>Oceanospirillaceae</i>           | <i>Oceanospirillales</i>            | <i>Gammaproteobacteria</i>    | <i>Proteobacteria</i>    | <i>Bacteria</i> |
| Otu0170 | 0.88                      | 0                             | 0.32              | 1.8                   | 0.34                | 58.61                | unclass. <i>Bacteria</i>            | unclass. <i>Bacteria</i>            | unclass. <i>Bacteria</i>            | unclass. <i>Bacteria</i>      | unclass. <i>Bacteria</i> | <i>Bacteria</i> |
| Otu0203 | 0.88                      | 0                             | 0.31              | 1.86                  | 0.34                | 58.95                | <i>Pelagibacter</i>                 | SAR11-clade                         | <i>Rickettsiales</i>                | <i>Alphaproteobacteria</i>    | <i>Proteobacteria</i>    | <i>Bacteria</i> |
| Otu0232 | 0.89                      | 0                             | 0.31              | 1.13                  | 0.34                | 59.29                | unclass. <i>Rhodobacteraceae</i>    | <i>Rhodobacteraceae</i>             | <i>Rhodobacterales</i>              | <i>Alphaproteobacteria</i>    | <i>Proteobacteria</i>    | <i>Bacteria</i> |
| Otu0066 | 0.88                      | 0                             | 0.31              | 1.1                   | 0.34                | 59.63                | <i>Granulosicoccus</i>              | <i>Granulosicoccaceae</i>           | <i>Chromatiales</i>                 | <i>Gammaproteobacteria</i>    | <i>Proteobacteria</i>    | <i>Bacteria</i> |
| Otu1837 | 0.88                      | 0                             | 0.31              | 1.85                  | 0.33                | 59.96                | unclass. <i>Flavobacteriales</i>    | unclass. <i>Flavobacteriales</i>    | <i>Flavobacteriales</i>             | <i>Flavobacteria</i>          | <i>Bacteroidetes</i>     | <i>Bacteria</i> |
| Otu1081 | 0.82                      | 0                             | 0.29              | 0.49                  | 0.31                | 60.27                | unclass. <i>Flavobacteriales</i>    | unclass. <i>Flavobacteriales</i>    | <i>Flavobacteriales</i>             | <i>Flavobacteria</i>          | <i>Bacteroidetes</i>     | <i>Bacteria</i> |
| Otu1816 | 0.8                       | 0                             | 0.29              | 1.96                  | 0.31                | 60.58                | unclass. <i>Flavobacteriales</i>    | unclass. <i>Flavobacteriales</i>    | <i>Flavobacteriales</i>             | <i>Flavobacteria</i>          | <i>Bacteroidetes</i>     | <i>Bacteria</i> |
| Otu0117 | 0.4                       | 0.88                          | 0.28              | 1.17                  | 0.31                | 60.89                | <i>Arcobacter</i>                   | <i>Campylobacteraceae</i>           | <i>Campylobacterales</i>            | <i>Epsilonproteobacteria</i>  | <i>Proteobacteria</i>    | <i>Bacteria</i> |
| Otu0348 | 0.8                       | 0                             | 0.28              | 1.95                  | 0.31                | 61.2                 | unclass. <i>Flavobacteriaceae</i>   | <i>Flavobacteriaceae</i>            | <i>Flavobacteriales</i>             | <i>Flavobacteria</i>          | <i>Bacteroidetes</i>     | <i>Bacteria</i> |
| Otu0369 | 0.8                       | 0                             | 0.28              | 1.96                  | 0.3                 | 61.5                 | unclass. <i>Deltaproteobacteria</i> | unclass. <i>Deltaproteobacteria</i> | unclass. <i>Deltaproteobacteria</i> | <i>Deltaproteobacteria</i>    | <i>Proteobacteria</i>    | <i>Bacteria</i> |
| Otu0036 | 0.77                      | 0                             | 0.27              | 1.16                  | 0.3                 | 61.8                 | <i>Glaciecola</i>                   | <i>Alteromonadaceae</i>             | <i>Alteromonadales</i>              | <i>Gammaproteobacteria</i>    | <i>Proteobacteria</i>    | <i>Bacteria</i> |
| Otu1780 | 0                         | 0.77                          | 0.27              | 0.68                  | 0.29                | 62.09                | unclass. <i>Oceanospirillales</i>   | unclass. <i>Oceanospirillales</i>   | <i>Oceanospirillales</i>            | <i>Gammaproteobacteria</i>    | <i>Proteobacteria</i>    | <i>Bacteria</i> |
| Otu1692 | 0.77                      | 0                             | 0.27              | 0.76                  | 0.29                | 62.38                | unclass. <i>Rhodobacteraceae</i>    | <i>Rhodobacteraceae</i>             | <i>Rhodobacterales</i>              | <i>Alphaproteobacteria</i>    | <i>Proteobacteria</i>    | <i>Bacteria</i> |
| Otu0025 | 0.75                      | 0                             | 0.26              | 0.8                   | 0.28                | 62.67                | <i>Polaribacter</i>                 | <i>Flavobacteriaceae</i>            | <i>Flavobacteriales</i>             | <i>Flavobacteria</i>          | <i>Bacteroidetes</i>     | <i>Bacteria</i> |
| Otu0140 | 1.09                      | 1.08                          | 0.25              | 1.22                  | 0.27                | 62.94                | <i>Oleispira</i>                    | <i>Oceanospirillaceae</i>           | <i>Oceanospirillales</i>            | <i>Gammaproteobacteria</i>    | <i>Proteobacteria</i>    | <i>Bacteria</i> |
| Otu1821 | 0.68                      | 0                             | 0.24              | 1.14                  | 0.27                | 63.2                 | unclass. <i>Bacteroidetes</i>       | unclass. <i>Bacteroidetes</i>       | unclass. <i>Bacteroidetes</i>       | unclass. <i>Bacteroidetes</i> | <i>Bacteroidetes</i>     | <i>Bacteria</i> |
| Otu0521 | 0.68                      | 0                             | 0.24              | 1.16                  | 0.26                | 63.47                | unclass. <i>Rhodobacteraceae</i>    | <i>Rhodobacteraceae</i>             | <i>Rhodobacterales</i>              | <i>Alphaproteobacteria</i>    | <i>Proteobacteria</i>    | <i>Bacteria</i> |
| Otu1629 | 0.68                      | 0                             | 0.24              | 1.15                  | 0.26                | 63.73                | unclass. <i>Flammeovirgaceae</i>    | <i>Flammeovirgaceae</i>             | <i>Sphingobacteriales</i>           | <i>Sphingobacteria</i>        | <i>Bacteroidetes</i>     | <i>Bacteria</i> |
| Otu0026 | 0.68                      | 0                             | 0.24              | 1.16                  | 0.26                | 63.99                | unclass. <i>Rhodobacteraceae</i>    | <i>Rhodobacteraceae</i>             | <i>Rhodobacterales</i>              | <i>Alphaproteobacteria</i>    | <i>Proteobacteria</i>    | <i>Bacteria</i> |
| Otu1873 | 0.68                      | 0                             | 0.24              | 1.16                  | 0.26                | 64.25                | unclass. <i>Bacteria</i>            | unclass. <i>Bacteria</i>            | unclass. <i>Bacteria</i>            | unclass. <i>Bacteria</i>      | unclass. <i>Bacteria</i> | <i>Bacteria</i> |
| Otu0216 | 0.63                      | 0                             | 0.22              | 0.79                  | 0.24                | 64.48                | <i>Pelagibacter</i>                 | SAR11-clade                         | <i>Rickettsiales</i>                | <i>Alphaproteobacteria</i>    | <i>Proteobacteria</i>    | <i>Bacteria</i> |

| OTU     | Av.A <sub>i</sub><br>(no) | Av.A <sub>i</sub><br>(serial) | Av.δ <sub>i</sub> | Av.δ <sub>i</sub> /SD | Av.δ <sub>i</sub> % | ΣAv.δ <sub>i</sub> % | Genus                               | Family                              | Order                               | Class                          | Phylum                   | Domain          |
|---------|---------------------------|-------------------------------|-------------------|-----------------------|---------------------|----------------------|-------------------------------------|-------------------------------------|-------------------------------------|--------------------------------|--------------------------|-----------------|
| Otu0051 | 0.6                       | 0                             | 0.21              | 1.2                   | 0.23                | 64.72                | unclass. <i>Flavobacteriaceae</i>   | <i>Flavobacteriaceae</i>            | <i>Flavobacteriales</i>             | <i>Flavobacteria</i>           | <i>Bacteroidetes</i>     | <i>Bacteria</i> |
| Otu0176 | 0                         | 0.6                           | 0.21              | 1.2                   | 0.23                | 64.95                | <i>Colwellia</i>                    | <i>Colwelliaceae</i>                | <i>Alteromonadales</i>              | <i>Gammaproteobacteria</i>     | <i>Proteobacteria</i>    | <i>Bacteria</i> |
| Otu1783 | 0                         | 0.6                           | 0.21              | 1.2                   | 0.23                | 65.18                | <i>Marinomonas</i>                  | <i>Oceanospirillaceae</i>           | <i>Oceanospirillales</i>            | <i>Gammaproteobacteria</i>     | <i>Proteobacteria</i>    | <i>Bacteria</i> |
| Otu0364 | 0.6                       | 0                             | 0.21              | 1.2                   | 0.23                | 65.4                 | unclass. <i>Flavobacteriaceae</i>   | <i>Flavobacteriaceae</i>            | <i>Flavobacteriales</i>             | <i>Flavobacteria</i>           | <i>Bacteroidetes</i>     | <i>Bacteria</i> |
| Otu0169 | 0.6                       | 0                             | 0.21              | 1.2                   | 0.23                | 65.63                | unclass. <i>Bacteria</i>            | unclass. <i>Bacteria</i>            | unclass. <i>Bacteria</i>            | unclass. <i>Bacteria</i>       | unclass. <i>Bacteria</i> | <i>Bacteria</i> |
| Otu0899 | 0.6                       | 0                             | 0.21              | 1.2                   | 0.23                | 65.86                | unclass. <i>Betaproteobacteria</i>  | unclass. <i>Betaproteobacteria</i>  | unclass. <i>Betaproteobacteria</i>  | <i>Betaproteobacteria</i>      | <i>Proteobacteria</i>    | <i>Bacteria</i> |
| Otu1828 | 0.6                       | 0                             | 0.21              | 0.73                  | 0.23                | 66.09                | unclass. <i>Chromatiales</i>        | unclass. <i>Chromatiales</i>        | <i>Chromatiales</i>                 | <i>Gammaproteobacteria</i>     | <i>Proteobacteria</i>    | <i>Bacteria</i> |
| Otu0234 | 0.6                       | 0.2                           | 0.2               | 1.1                   | 0.22                | 66.3                 | <i>Arcobacter</i>                   | <i>Campylobacteraceae</i>           | <i>Campylobacterales</i>            | <i>Epsilonproteobacteria</i>   | <i>Proteobacteria</i>    | <i>Bacteria</i> |
| Otu0027 | 0.57                      | 0                             | 0.2               | 0.8                   | 0.21                | 66.52                | <i>Pseudoalteromonas</i>            | <i>Pseudoalteromonadaceae</i>       | <i>Alteromonadales</i>              | <i>Gammaproteobacteria</i>     | <i>Proteobacteria</i>    | <i>Bacteria</i> |
| Otu0173 | 0.55                      | 0                             | 0.2               | 0.76                  | 0.21                | 66.73                | unclass. <i>Alteromonadaceae</i>    | <i>Alteromonadaceae</i>             | <i>Alteromonadales</i>              | <i>Gammaproteobacteria</i>     | <i>Proteobacteria</i>    | <i>Bacteria</i> |
| Otu0290 | 0.55                      | 0                             | 0.19              | 0.76                  | 0.21                | 66.94                | unclass. <i>Flavobacteriaceae</i>   | <i>Flavobacteriaceae</i>            | <i>Flavobacteriales</i>             | <i>Flavobacteria</i>           | <i>Bacteroidetes</i>     | <i>Bacteria</i> |
| Otu0533 | 0                         | 0.48                          | 0.17              | 0.78                  | 0.19                | 67.12                | <i>Nisaea</i>                       | <i>Rhodospirillaceae</i>            | <i>Rhodospirillales</i>             | <i>Alphaproteobacteria</i>     | <i>Proteobacteria</i>    | <i>Bacteria</i> |
| Otu1084 | 0                         | 0.48                          | 0.17              | 0.78                  | 0.18                | 67.31                | <i>Marinomonas</i>                  | <i>Oceanospirillaceae</i>           | <i>Oceanospirillales</i>            | <i>Gammaproteobacteria</i>     | <i>Proteobacteria</i>    | <i>Bacteria</i> |
| Otu1119 | 0.48                      | 0                             | 0.17              | 0.78                  | 0.18                | 67.49                | unclass. <i>Bacteroidetes</i>       | unclass. <i>Bacteroidetes</i>       | unclass. <i>Bacteroidetes</i>       | unclass. <i>Bacteroidetes</i>  | <i>Bacteroidetes</i>     | <i>Bacteria</i> |
| Otu1231 | 0                         | 0.48                          | 0.17              | 0.78                  | 0.18                | 67.68                | unclass. <i>Gammaproteobacteria</i> | unclass. <i>Gammaproteobacteria</i> | unclass. <i>Gammaproteobacteria</i> | <i>Gammaproteobacteria</i>     | <i>Proteobacteria</i>    | <i>Bacteria</i> |
| Otu0686 | 0.4                       | 0.4                           | 0.17              | 0.94                  | 0.18                | 67.86                | <i>Marinomonas</i>                  | <i>Oceanospirillaceae</i>           | <i>Oceanospirillales</i>            | <i>Gammaproteobacteria</i>     | <i>Proteobacteria</i>    | <i>Bacteria</i> |
| Otu0172 | 0.48                      | 0                             | 0.17              | 0.78                  | 0.18                | 68.04                | unclass. <i>Gammaproteobacteria</i> | unclass. <i>Gammaproteobacteria</i> | unclass. <i>Gammaproteobacteria</i> | <i>Gammaproteobacteria</i>     | <i>Proteobacteria</i>    | <i>Bacteria</i> |
| Otu0202 | 0.48                      | 0                             | 0.17              | 0.78                  | 0.18                | 68.22                | unclass. <i>Alteromonadaceae</i>    | <i>Alteromonadaceae</i>             | <i>Alteromonadales</i>              | <i>Gammaproteobacteria</i>     | <i>Proteobacteria</i>    | <i>Bacteria</i> |
| Otu1848 | 0.48                      | 0                             | 0.17              | 0.78                  | 0.18                | 68.41                | unclass. <i>Gammaproteobacteria</i> | unclass. <i>Gammaproteobacteria</i> | unclass. <i>Gammaproteobacteria</i> | <i>Gammaproteobacteria</i>     | <i>Proteobacteria</i>    | <i>Bacteria</i> |
| Otu0254 | 0.48                      | 0                             | 0.17              | 0.78                  | 0.18                | 68.59                | unclass. <i>Flavobacteriaceae</i>   | <i>Flavobacteriaceae</i>            | <i>Flavobacteriales</i>             | <i>Flavobacteria</i>           | <i>Bacteroidetes</i>     | <i>Bacteria</i> |
| Otu0333 | 0.48                      | 0                             | 0.17              | 0.78                  | 0.18                | 68.77                | unclass. <i>Gammaproteobacteria</i> | unclass. <i>Gammaproteobacteria</i> | unclass. <i>Gammaproteobacteria</i> | <i>Gammaproteobacteria</i>     | <i>Proteobacteria</i>    | <i>Bacteria</i> |
| Otu0072 | 0.48                      | 0                             | 0.17              | 0.78                  | 0.18                | 68.95                | <i>Sulfitobacter</i>                | <i>Rhodobacteraceae</i>             | <i>Rhodobacterales</i>              | <i>Alphaproteobacteria</i>     | <i>Proteobacteria</i>    | <i>Bacteria</i> |
| Otu0153 | 0.48                      | 0                             | 0.17              | 0.78                  | 0.18                | 69.13                | unclass. <i>Gammaproteobacteria</i> | unclass. <i>Gammaproteobacteria</i> | unclass. <i>Gammaproteobacteria</i> | <i>Gammaproteobacteria</i>     | <i>Proteobacteria</i>    | <i>Bacteria</i> |
| Otu0310 | 0.48                      | 0                             | 0.17              | 0.78                  | 0.18                | 69.32                | unclass. <i>Bacteria</i>            | unclass. <i>Bacteria</i>            | unclass. <i>Bacteria</i>            | unclass. <i>Bacteria</i>       | unclass. <i>Bacteria</i> | <i>Bacteria</i> |
| Otu0673 | 0.48                      | 0                             | 0.17              | 0.78                  | 0.18                | 69.5                 | <i>Thalassolituus</i>               | <i>Oceanospirillaceae</i>           | <i>Oceanospirillales</i>            | <i>Gammaproteobacteria</i>     | <i>Proteobacteria</i>    | <i>Bacteria</i> |
| Otu1111 | 0.45                      | 0                             | 0.16              | 0.49                  | 0.17                | 69.67                | unclass. <i>Proteobacteria</i>      | unclass. <i>Proteobacteria</i>      | unclass. <i>Proteobacteria</i>      | unclass. <i>Proteobacteria</i> | <i>Proteobacteria</i>    | <i>Bacteria</i> |
| Otu0347 | 0.4                       | 0                             | 0.15              | 0.49                  | 0.16                | 69.83                | unclass. <i>Flavobacteriaceae</i>   | <i>Flavobacteriaceae</i>            | <i>Flavobacteriales</i>             | <i>Flavobacteria</i>           | <i>Bacteroidetes</i>     | <i>Bacteria</i> |

| OTU     | Av.A <sub>i</sub><br>(no) | Av.A <sub>i</sub><br>(serial) | Av.δ <sub>i</sub> | Av.δ <sub>i</sub> /SD | Av.δ <sub>i</sub> % | ΣAv.δ <sub>i</sub> % | Genus                               | Family                              | Order                               | Class                         | Phylum                   | Domain          |
|---------|---------------------------|-------------------------------|-------------------|-----------------------|---------------------|----------------------|-------------------------------------|-------------------------------------|-------------------------------------|-------------------------------|--------------------------|-----------------|
| Otu0283 | 0.4                       | 0                             | 0.15              | 0.8                   | 0.16                | 69.99                | unclass. <i>Gammaproteobacteria</i> | unclass. <i>Gammaproteobacteria</i> | unclass. <i>Gammaproteobacteria</i> | <i>Gammaproteobacteria</i>    | <i>Proteobacteria</i>    | <i>Bacteria</i> |
| Otu1697 | 0.4                       | 0                             | 0.15              | 0.8                   | 0.16                | 70.15                | unclass. <i>Bacteria</i>            | unclass. <i>Bacteria</i>            | unclass. <i>Bacteria</i>            | unclass. <i>Bacteria</i>      | unclass. <i>Bacteria</i> | <i>Bacteria</i> |
| Otu1861 | 0.4                       | 0                             | 0.15              | 0.8                   | 0.16                | 70.3                 | unclass. <i>Gammaproteobacteria</i> | unclass. <i>Gammaproteobacteria</i> | unclass. <i>Gammaproteobacteria</i> | <i>Gammaproteobacteria</i>    | <i>Proteobacteria</i>    | <i>Bacteria</i> |
| Otu0094 | 0.4                       | 0                             | 0.14              | 0.8                   | 0.16                | 70.46                | unclass. <i>Flavobacteriaceae</i>   | <i>Flavobacteriaceae</i>            | <i>Flavobacteriales</i>             | <i>Flavobacteria</i>          | <i>Bacteroidetes</i>     | <i>Bacteria</i> |
| Otu1267 | 0.4                       | 0                             | 0.14              | 0.8                   | 0.16                | 70.62                | unclass. <i>Gammaproteobacteria</i> | unclass. <i>Gammaproteobacteria</i> | unclass. <i>Gammaproteobacteria</i> | <i>Gammaproteobacteria</i>    | <i>Proteobacteria</i>    | <i>Bacteria</i> |
| Otu1818 | 0.4                       | 0                             | 0.14              | 0.8                   | 0.16                | 70.77                | unclass. <i>Bacteria</i>            | unclass. <i>Bacteria</i>            | unclass. <i>Bacteria</i>            | unclass. <i>Bacteria</i>      | unclass. <i>Bacteria</i> | <i>Bacteria</i> |
| Otu1836 | 0.4                       | 0                             | 0.14              | 0.8                   | 0.16                | 70.93                | unclass. <i>Bacteroidetes</i>       | unclass. <i>Bacteroidetes</i>       | unclass. <i>Bacteroidetes</i>       | unclass. <i>Bacteroidetes</i> | <i>Bacteroidetes</i>     | <i>Bacteria</i> |
| Otu0272 | 0.4                       | 0                             | 0.14              | 0.8                   | 0.16                | 71.09                | unclass. <i>Flavobacteriaceae</i>   | <i>Flavobacteriaceae</i>            | <i>Flavobacteriales</i>             | <i>Flavobacteria</i>          | <i>Bacteroidetes</i>     | <i>Bacteria</i> |
| Otu0057 | 0.4                       | 0                             | 0.14              | 0.8                   | 0.16                | 71.24                | <i>Ulvibacter</i>                   | <i>Flavobacteriaceae</i>            | <i>Flavobacteriales</i>             | <i>Flavobacteria</i>          | <i>Bacteroidetes</i>     | <i>Bacteria</i> |
| Otu0497 | 0.4                       | 0                             | 0.14              | 0.8                   | 0.16                | 71.4                 | <i>Opitutus</i>                     | <i>Opitutaceae</i>                  | <i>Opitales</i>                     | <i>Opitutae</i>               | <i>Verrucomicrobia</i>   | <i>Bacteria</i> |
| Otu1480 | 0.4                       | 0                             | 0.14              | 0.8                   | 0.16                | 71.55                | unclass. <i>Flavobacteriaceae</i>   | <i>Flavobacteriaceae</i>            | <i>Flavobacteriales</i>             | <i>Flavobacteria</i>          | <i>Bacteroidetes</i>     | <i>Bacteria</i> |
| Otu1079 | 0                         | 0.4                           | 0.14              | 0.8                   | 0.15                | 71.71                | <i>Marinomonas</i>                  | <i>Oceanospirillaceae</i>           | <i>Oceanospirillales</i>            | <i>Gammaproteobacteria</i>    | <i>Proteobacteria</i>    | <i>Bacteria</i> |
| Otu1065 | 0                         | 0.4                           | 0.14              | 0.8                   | 0.15                | 71.86                | <i>Marinomonas</i>                  | <i>Oceanospirillaceae</i>           | <i>Oceanospirillales</i>            | <i>Gammaproteobacteria</i>    | <i>Proteobacteria</i>    | <i>Bacteria</i> |
| Otu0015 | 0.4                       | 0                             | 0.14              | 0.8                   | 0.15                | 72.02                | <i>Polaribacter</i>                 | <i>Flavobacteriaceae</i>            | <i>Flavobacteriales</i>             | <i>Flavobacteria</i>          | <i>Bacteroidetes</i>     | <i>Bacteria</i> |
| Otu0019 | 0.4                       | 0                             | 0.14              | 0.8                   | 0.15                | 72.17                | unclass. <i>Gammaproteobacteria</i> | unclass. <i>Gammaproteobacteria</i> | unclass. <i>Gammaproteobacteria</i> | <i>Gammaproteobacteria</i>    | <i>Proteobacteria</i>    | <i>Bacteria</i> |
| Otu0093 | 0.4                       | 0                             | 0.14              | 0.8                   | 0.15                | 72.32                | <i>Aestuariicola</i>                | <i>Flavobacteriaceae</i>            | <i>Flavobacteriales</i>             | <i>Flavobacteria</i>          | <i>Bacteroidetes</i>     | <i>Bacteria</i> |
| Otu0443 | 0.4                       | 0                             | 0.14              | 0.8                   | 0.15                | 72.47                | unclass. <i>Gammaproteobacteria</i> | unclass. <i>Gammaproteobacteria</i> | unclass. <i>Gammaproteobacteria</i> | <i>Gammaproteobacteria</i>    | <i>Proteobacteria</i>    | <i>Bacteria</i> |
| Otu0858 | 0.4                       | 0                             | 0.14              | 0.8                   | 0.15                | 72.63                | unclass. <i>Flavobacteriaceae</i>   | <i>Flavobacteriaceae</i>            | <i>Flavobacteriales</i>             | <i>Flavobacteria</i>          | <i>Bacteroidetes</i>     | <i>Bacteria</i> |
| Otu1827 | 0.4                       | 0                             | 0.14              | 0.8                   | 0.15                | 72.78                | unclass. <i>Acidobacteria_Gp22</i>  | unclass. <i>Acidobacteria_Gp22</i>  | unclass. <i>Acidobacteria_Gp22</i>  | <i>Acidobacteria_Gp22</i>     | <i>Acidobacteria</i>     | <i>Bacteria</i> |
| Otu1795 | 0.2                       | 0.28                          | 0.14              | 0.69                  | 0.15                | 72.93                | <i>Colwellia</i>                    | <i>Colwelliaceae</i>                | <i>Alteromonadales</i>              | <i>Gammaproteobacteria</i>    | <i>Proteobacteria</i>    | <i>Bacteria</i> |
| Otu0448 | 0.4                       | 0                             | 0.14              | 0.8                   | 0.15                | 73.08                | unclass. <i>Desulfuromonadaceae</i> | <i>Desulfuromonadaceae</i>          | <i>Desulfuromonadales</i>           | <i>Deltaproteobacteria</i>    | <i>Proteobacteria</i>    | <i>Bacteria</i> |
| Otu1875 | 0.4                       | 0                             | 0.14              | 0.8                   | 0.15                | 73.24                | unclass. <i>Bacteria</i>            | unclass. <i>Bacteria</i>            | unclass. <i>Bacteria</i>            | unclass. <i>Bacteria</i>      | unclass. <i>Bacteria</i> | <i>Bacteria</i> |
| Otu0319 | 0.4                       | 0                             | 0.14              | 0.8                   | 0.15                | 73.39                | unclass. <i>Flammeovirgaceae</i>    | <i>Flammeovirgaceae</i>             | <i>Sphingobacteriales</i>           | <i>Sphingobacteria</i>        | <i>Bacteroidetes</i>     | <i>Bacteria</i> |
| Otu0356 | 0.4                       | 0                             | 0.14              | 0.8                   | 0.15                | 73.54                | unclass. <i>Comamonadaceae</i>      | <i>Comamonadaceae</i>               | <i>Burkholderiales</i>              | <i>Betaproteobacteria</i>     | <i>Proteobacteria</i>    | <i>Bacteria</i> |
| Otu1913 | 0.4                       | 0                             | 0.14              | 0.8                   | 0.15                | 73.69                | unclass. <i>Gammaproteobacteria</i> | unclass. <i>Gammaproteobacteria</i> | unclass. <i>Gammaproteobacteria</i> | <i>Gammaproteobacteria</i>    | <i>Proteobacteria</i>    | <i>Bacteria</i> |
| Otu0370 | 0.4                       | 0                             | 0.14              | 0.8                   | 0.15                | 73.84                | unclass. <i>Gammaproteobacteria</i> | unclass. <i>Gammaproteobacteria</i> | unclass. <i>Gammaproteobacteria</i> | <i>Gammaproteobacteria</i>    | <i>Proteobacteria</i>    | <i>Bacteria</i> |
| Otu0696 | 0.4                       | 0                             | 0.14              | 0.8                   | 0.15                | 74                   | unclass. <i>Flavobacteriaceae</i>   | <i>Flavobacteriaceae</i>            | <i>Flavobacteriales</i>             | <i>Flavobacteria</i>          | <i>Bacteroidetes</i>     | <i>Bacteria</i> |

| OTU     | Av.A <sub>i</sub><br>(no) | Av.A <sub>i</sub><br>(serial) | Av.δ <sub>i</sub> | Av.δ <sub>i</sub> /SD | Av.δ <sub>i</sub> % | ΣAv.δ <sub>i</sub> % | Genus                               | Family                              | Order                               | Class                          | Phylum                   | Domain          |
|---------|---------------------------|-------------------------------|-------------------|-----------------------|---------------------|----------------------|-------------------------------------|-------------------------------------|-------------------------------------|--------------------------------|--------------------------|-----------------|
| Otu1824 | 0.4                       | 0                             | 0.14              | 0.8                   | 0.15                | 74.15                | unclass. <i>Gammaproteobacteria</i> | unclass. <i>Gammaproteobacteria</i> | unclass. <i>Gammaproteobacteria</i> | <i>Gammaproteobacteria</i>     | <i>Proteobacteria</i>    | <i>Bacteria</i> |
| Otu1851 | 0.4                       | 0                             | 0.14              | 0.8                   | 0.15                | 74.3                 | <i>Aureispira</i>                   | <i>Saprospiraceae</i>               | <i>Sphingobacteriales</i>           | <i>Sphingobacteria</i>         | <i>Bacteroidetes</i>     | <i>Bacteria</i> |
| Otu1566 | 0.4                       | 0                             | 0.14              | 0.8                   | 0.15                | 74.45                | <i>Gaetbulibacter</i>               | <i>Flavobacteriaceae</i>            | <i>Flavobacteriales</i>             | <i>Flavobacteria</i>           | <i>Bacteroidetes</i>     | <i>Bacteria</i> |
| Otu1841 | 0.4                       | 0                             | 0.14              | 0.8                   | 0.15                | 74.6                 | unclass. <i>Flavobacteriaceae</i>   | <i>Flavobacteriaceae</i>            | <i>Flavobacteriales</i>             | <i>Flavobacteria</i>           | <i>Bacteroidetes</i>     | <i>Bacteria</i> |
| Otu0191 | 0.4                       | 0                             | 0.14              | 0.8                   | 0.15                | 74.75                | unclass. <i>Proteobacteria</i>      | unclass. <i>Proteobacteria</i>      | unclass. <i>Proteobacteria</i>      | unclass. <i>Proteobacteria</i> | <i>Proteobacteria</i>    | <i>Bacteria</i> |
| Otu0282 | 0.4                       | 0                             | 0.14              | 0.49                  | 0.15                | 74.9                 | <i>Haliae</i>                       | <i>Alteromonadaceae</i>             | <i>Alteromonadales</i>              | <i>Gammaproteobacteria</i>     | <i>Proteobacteria</i>    | <i>Bacteria</i> |
| Otu0119 | 0.35                      | 0                             | 0.13              | 0.49                  | 0.14                | 75.04                | <i>Colwellia</i>                    | <i>Colwelliaceae</i>                | <i>Alteromonadales</i>              | <i>Gammaproteobacteria</i>     | <i>Proteobacteria</i>    | <i>Bacteria</i> |
| Otu1883 | 0.35                      | 0                             | 0.13              | 0.49                  | 0.14                | 75.18                | unclass. <i>Rhodobacteraceae</i>    | <i>Rhodobacteraceae</i>             | <i>Rhodobacterales</i>              | <i>Alphaproteobacteria</i>     | <i>Proteobacteria</i>    | <i>Bacteria</i> |
| Otu0413 | 0.35                      | 0                             | 0.12              | 0.49                  | 0.13                | 75.31                | <i>Eudoraea</i>                     | <i>Flavobacteriaceae</i>            | <i>Flavobacteriales</i>             | <i>Flavobacteria</i>           | <i>Bacteroidetes</i>     | <i>Bacteria</i> |
| Otu0151 | 0.28                      | 0                             | 0.11              | 0.49                  | 0.11                | 75.43                | <i>Rhodococcus</i>                  | <i>Nocardiaceae</i>                 | <i>Actinomycetales</i>              | <i>Actinobacteria</i>          | <i>Actinobacteria</i>    | <i>Bacteria</i> |
| Otu0230 | 0.28                      | 0                             | 0.11              | 0.49                  | 0.11                | 75.54                | unclass. <i>Rhodobacteraceae</i>    | <i>Rhodobacteraceae</i>             | <i>Rhodobacterales</i>              | <i>Alphaproteobacteria</i>     | <i>Proteobacteria</i>    | <i>Bacteria</i> |
| Otu0354 | 0.28                      | 0                             | 0.11              | 0.49                  | 0.11                | 75.65                | <i>Andersenella</i>                 | <i>Rhodobiaceae</i>                 | <i>Rhizobiales</i>                  | <i>Alphaproteobacteria</i>     | <i>Proteobacteria</i>    | <i>Bacteria</i> |
| Otu0459 | 0.28                      | 0                             | 0.11              | 0.49                  | 0.11                | 75.77                | <i>Croceibacter</i>                 | <i>Flavobacteriaceae</i>            | <i>Flavobacteriales</i>             | <i>Flavobacteria</i>           | <i>Bacteroidetes</i>     | <i>Bacteria</i> |
| Otu1188 | 0.28                      | 0                             | 0.11              | 0.49                  | 0.11                | 75.88                | unclass. <i>Flammeovirgaceae</i>    | <i>Flammeovirgaceae</i>             | <i>Sphingobacteriales</i>           | <i>Sphingobacteria</i>         | <i>Bacteroidetes</i>     | <i>Bacteria</i> |
| Otu0490 | 0.28                      | 0                             | 0.1               | 0.49                  | 0.11                | 75.99                | unclass. <i>Burkholderiales</i>     | unclass. <i>Burkholderiales</i>     | <i>Burkholderiales</i>              | <i>Betaproteobacteria</i>      | <i>Proteobacteria</i>    | <i>Bacteria</i> |
| Otu1274 | 0.28                      | 0                             | 0.1               | 0.49                  | 0.11                | 76.1                 | unclass. <i>Gammaproteobacteria</i> | unclass. <i>Gammaproteobacteria</i> | unclass. <i>Gammaproteobacteria</i> | <i>Gammaproteobacteria</i>     | <i>Proteobacteria</i>    | <i>Bacteria</i> |
| Otu1909 | 0.28                      | 0                             | 0.1               | 0.49                  | 0.11                | 76.21                | unclass. <i>Bacteria</i>            | unclass. <i>Bacteria</i>            | unclass. <i>Bacteria</i>            | unclass. <i>Bacteria</i>       | unclass. <i>Bacteria</i> | <i>Bacteria</i> |
| Otu1910 | 0.28                      | 0                             | 0.1               | 0.49                  | 0.11                | 76.32                | unclass. <i>Gammaproteobacteria</i> | unclass. <i>Gammaproteobacteria</i> | unclass. <i>Gammaproteobacteria</i> | <i>Gammaproteobacteria</i>     | <i>Proteobacteria</i>    | <i>Bacteria</i> |
| Otu1920 | 0.28                      | 0                             | 0.1               | 0.49                  | 0.11                | 76.43                | unclass. <i>Gammaproteobacteria</i> | unclass. <i>Gammaproteobacteria</i> | unclass. <i>Gammaproteobacteria</i> | <i>Gammaproteobacteria</i>     | <i>Proteobacteria</i>    | <i>Bacteria</i> |
| Otu1922 | 0.28                      | 0                             | 0.1               | 0.49                  | 0.11                | 76.54                | unclass. <i>Bacteria</i>            | unclass. <i>Bacteria</i>            | unclass. <i>Bacteria</i>            | unclass. <i>Bacteria</i>       | unclass. <i>Bacteria</i> | <i>Bacteria</i> |
| Otu0267 | 0.28                      | 0                             | 0.1               | 0.49                  | 0.11                | 76.64                | unclass. <i>Flavobacteriaceae</i>   | <i>Flavobacteriaceae</i>            | <i>Flavobacteriales</i>             | <i>Flavobacteria</i>           | <i>Bacteroidetes</i>     | <i>Bacteria</i> |
| Otu0341 | 0.28                      | 0                             | 0.1               | 0.49                  | 0.11                | 76.75                | unclass. <i>Gammaproteobacteria</i> | unclass. <i>Gammaproteobacteria</i> | unclass. <i>Gammaproteobacteria</i> | <i>Gammaproteobacteria</i>     | <i>Proteobacteria</i>    | <i>Bacteria</i> |
| Otu1819 | 0.28                      | 0                             | 0.1               | 0.49                  | 0.11                | 76.86                | unclass. <i>Bacteroidetes</i>       | unclass. <i>Bacteroidetes</i>       | unclass. <i>Bacteroidetes</i>       | unclass. <i>Bacteroidetes</i>  | <i>Bacteroidetes</i>     | <i>Bacteria</i> |
| Otu0115 | 0                         | 0.28                          | 0.1               | 0.49                  | 0.11                | 76.96                | <i>Glaciecola</i>                   | <i>Alteromonadaceae</i>             | <i>Alteromonadales</i>              | <i>Gammaproteobacteria</i>     | <i>Proteobacteria</i>    | <i>Bacteria</i> |
| Otu0256 | 0.28                      | 0                             | 0.1               | 0.49                  | 0.11                | 77.07                | <i>Glaciecola</i>                   | <i>Alteromonadaceae</i>             | <i>Alteromonadales</i>              | <i>Gammaproteobacteria</i>     | <i>Proteobacteria</i>    | <i>Bacteria</i> |
| Otu0508 | 0.28                      | 0                             | 0.1               | 0.49                  | 0.11                | 77.18                | unclass. <i>Flavobacteriales</i>    | unclass. <i>Flavobacteriales</i>    | <i>Flavobacteriales</i>             | <i>Flavobacteria</i>           | <i>Bacteroidetes</i>     | <i>Bacteria</i> |
| Otu0985 | 0.28                      | 0                             | 0.1               | 0.49                  | 0.11                | 77.28                | unclass. <i>Gammaproteobacteria</i> | unclass. <i>Gammaproteobacteria</i> | unclass. <i>Gammaproteobacteria</i> | <i>Gammaproteobacteria</i>     | <i>Proteobacteria</i>    | <i>Bacteria</i> |

| OTU     | Av.A <sub>i</sub><br>(no) | Av.A <sub>i</sub><br>(serial) | Av.δ <sub>i</sub> | Av.δ <sub>i</sub> /SD | Av.δ <sub>i</sub> % | ΣAv.δ <sub>i</sub> % | Genus                               | Family                              | Order                               | Class                          | Phylum                   | Domain          |
|---------|---------------------------|-------------------------------|-------------------|-----------------------|---------------------|----------------------|-------------------------------------|-------------------------------------|-------------------------------------|--------------------------------|--------------------------|-----------------|
| Otu1854 | 0.28                      | 0                             | 0.1               | 0.49                  | 0.11                | 77.39                | unclass. <i>Gammaproteobacteria</i> | unclass. <i>Gammaproteobacteria</i> | unclass. <i>Gammaproteobacteria</i> | <i>Gammaproteobacteria</i>     | <i>Proteobacteria</i>    | <i>Bacteria</i> |
| Otu0185 | 0.28                      | 0                             | 0.1               | 0.49                  | 0.11                | 77.5                 | unclass. <i>Bacteria</i>            | unclass. <i>Bacteria</i>            | unclass. <i>Bacteria</i>            | unclass. <i>Bacteria</i>       | unclass. <i>Bacteria</i> | <i>Bacteria</i> |
| Otu0271 | 0.28                      | 0                             | 0.1               | 0.49                  | 0.11                | 77.6                 | unclass. <i>Proteobacteria</i>      | unclass. <i>Proteobacteria</i>      | unclass. <i>Proteobacteria</i>      | unclass. <i>Proteobacteria</i> | <i>Proteobacteria</i>    | <i>Bacteria</i> |
| Otu0691 | 0.28                      | 0                             | 0.1               | 0.49                  | 0.11                | 77.71                | <i>Planctomyces</i>                 | <i>Planctomycetaceae</i>            | <i>Planctomycetales</i>             | <i>Planctomycetacia</i>        | <i>Planctomycetes</i>    | <i>Bacteria</i> |
| Otu0880 | 0.28                      | 0                             | 0.1               | 0.49                  | 0.11                | 77.82                | unclass. <i>Flavobacteriaceae</i>   | <i>Flavobacteriaceae</i>            | <i>Flavobacteriales</i>             | <i>Flavobacteria</i>           | <i>Bacteroidetes</i>     | <i>Bacteria</i> |
| Otu1228 | 0.28                      | 0                             | 0.1               | 0.49                  | 0.11                | 77.92                | unclass. <i>Desulfobulbaceae</i>    | <i>Desulfobulbaceae</i>             | <i>Desulfobacterales</i>            | <i>Deltaproteobacteria</i>     | <i>Proteobacteria</i>    | <i>Bacteria</i> |
| Otu1696 | 0.28                      | 0                             | 0.1               | 0.49                  | 0.11                | 78.03                | <i>Pelagibacter</i>                 | SAR11-clade                         | <i>Rickettsiales</i>                | <i>Alphaproteobacteria</i>     | <i>Proteobacteria</i>    | <i>Bacteria</i> |
| Otu0028 | 0.2                       | 0                             | 0.07              | 0.49                  | 0.08                | 78.11                | unclass. <i>Gammaproteobacteria</i> | unclass. <i>Gammaproteobacteria</i> | unclass. <i>Gammaproteobacteria</i> | <i>Gammaproteobacteria</i>     | <i>Proteobacteria</i>    | <i>Bacteria</i> |
| Otu0156 | 0.2                       | 0                             | 0.07              | 0.49                  | 0.08                | 78.19                | unclass. <i>Gammaproteobacteria</i> | unclass. <i>Gammaproteobacteria</i> | unclass. <i>Gammaproteobacteria</i> | <i>Gammaproteobacteria</i>     | <i>Proteobacteria</i>    | <i>Bacteria</i> |
| Otu0159 | 0.2                       | 0                             | 0.07              | 0.49                  | 0.08                | 78.27                | unclass. <i>Saprospiraceae</i>      | <i>Saprospiraceae</i>               | <i>Sphingobacteriales</i>           | <i>Sphingobacteria</i>         | <i>Bacteroidetes</i>     | <i>Bacteria</i> |
| Otu0168 | 0.2                       | 0                             | 0.07              | 0.49                  | 0.08                | 78.35                | unclass. <i>Flavobacteriaceae</i>   | <i>Flavobacteriaceae</i>            | <i>Flavobacteriales</i>             | <i>Flavobacteria</i>           | <i>Bacteroidetes</i>     | <i>Bacteria</i> |
| Otu0192 | 0.2                       | 0                             | 0.07              | 0.49                  | 0.08                | 78.43                | unclass. <i>Gammaproteobacteria</i> | unclass. <i>Gammaproteobacteria</i> | unclass. <i>Gammaproteobacteria</i> | <i>Gammaproteobacteria</i>     | <i>Proteobacteria</i>    | <i>Bacteria</i> |
| Otu0204 | 0.2                       | 0                             | 0.07              | 0.49                  | 0.08                | 78.51                | unclass. <i>Colwelliaceae</i>       | <i>Colwelliaceae</i>                | <i>Alteromonadales</i>              | <i>Gammaproteobacteria</i>     | <i>Proteobacteria</i>    | <i>Bacteria</i> |
| Otu0208 | 0.2                       | 0                             | 0.07              | 0.49                  | 0.08                | 78.59                | unclass. <i>Saprospiraceae</i>      | <i>Saprospiraceae</i>               | <i>Sphingobacteriales</i>           | <i>Sphingobacteria</i>         | <i>Bacteroidetes</i>     | <i>Bacteria</i> |
| Otu0217 | 0.2                       | 0                             | 0.07              | 0.49                  | 0.08                | 78.68                | unclass. <i>Flavobacteriales</i>    | unclass. <i>Flavobacteriales</i>    | <i>Flavobacteriales</i>             | <i>Flavobacteria</i>           | <i>Bacteroidetes</i>     | <i>Bacteria</i> |
| Otu0240 | 0.2                       | 0                             | 0.07              | 0.49                  | 0.08                | 78.76                | unclass. <i>Chromatiales</i>        | unclass. <i>Chromatiales</i>        | <i>Chromatiales</i>                 | <i>Gammaproteobacteria</i>     | <i>Proteobacteria</i>    | <i>Bacteria</i> |
| Otu0295 | 0.2                       | 0                             | 0.07              | 0.49                  | 0.08                | 78.84                | <i>Halieta</i>                      | <i>Alteromonadaceae</i>             | <i>Alteromonadales</i>              | <i>Gammaproteobacteria</i>     | <i>Proteobacteria</i>    | <i>Bacteria</i> |
| Otu0314 | 0.2                       | 0                             | 0.07              | 0.49                  | 0.08                | 78.92                | unclass. <i>Flavobacteriaceae</i>   | <i>Flavobacteriaceae</i>            | <i>Flavobacteriales</i>             | <i>Flavobacteria</i>           | <i>Bacteroidetes</i>     | <i>Bacteria</i> |
| Otu0359 | 0.2                       | 0                             | 0.07              | 0.49                  | 0.08                | 79                   | unclass. <i>Gammaproteobacteria</i> | unclass. <i>Gammaproteobacteria</i> | unclass. <i>Gammaproteobacteria</i> | <i>Gammaproteobacteria</i>     | <i>Proteobacteria</i>    | <i>Bacteria</i> |
| Otu0398 | 0.2                       | 0                             | 0.07              | 0.49                  | 0.08                | 79.08                | unclass. <i>Flavobacteriaceae</i>   | <i>Flavobacteriaceae</i>            | <i>Flavobacteriales</i>             | <i>Flavobacteria</i>           | <i>Bacteroidetes</i>     | <i>Bacteria</i> |
| Otu0436 | 0.2                       | 0                             | 0.07              | 0.49                  | 0.08                | 79.16                | unclass. <i>Rhodobacteraceae</i>    | <i>Rhodobacteraceae</i>             | <i>Rhodobacterales</i>              | <i>Alphaproteobacteria</i>     | <i>Proteobacteria</i>    | <i>Bacteria</i> |
| Otu0479 | 0.2                       | 0                             | 0.07              | 0.49                  | 0.08                | 79.24                | unclass. <i>Rhodospirillaceae</i>   | <i>Rhodospirillaceae</i>            | <i>Rhodospirillales</i>             | <i>Alphaproteobacteria</i>     | <i>Proteobacteria</i>    | <i>Bacteria</i> |
| Otu0718 | 0.2                       | 0                             | 0.07              | 0.49                  | 0.08                | 79.32                | <i>Aureispira</i>                   | <i>Saprospiraceae</i>               | <i>Sphingobacteriales</i>           | <i>Sphingobacteria</i>         | <i>Bacteroidetes</i>     | <i>Bacteria</i> |
| Otu0765 | 0.2                       | 0                             | 0.07              | 0.49                  | 0.08                | 79.4                 | <i>Pelagicoccus</i>                 | <i>Puniceococcaceae</i>             | <i>Puniceococcales</i>              | <i>Opitutae</i>                | <i>Verrucomicrobia</i>   | <i>Bacteria</i> |
| Otu0931 | 0.2                       | 0                             | 0.07              | 0.49                  | 0.08                | 79.48                | <i>Robiginitalea</i>                | <i>Flavobacteriaceae</i>            | <i>Flavobacteriales</i>             | <i>Flavobacteria</i>           | <i>Bacteroidetes</i>     | <i>Bacteria</i> |
| Otu1008 | 0.2                       | 0                             | 0.07              | 0.49                  | 0.08                | 79.56                | unclass. <i>Flavobacteriaceae</i>   | <i>Flavobacteriaceae</i>            | <i>Flavobacteriales</i>             | <i>Flavobacteria</i>           | <i>Bacteroidetes</i>     | <i>Bacteria</i> |
| Otu1017 | 0.2                       | 0                             | 0.07              | 0.49                  | 0.08                | 79.64                | unclass. <i>Actinomycetales</i>     | unclass. <i>Actinomycetales</i>     | <i>Actinomycetales</i>              | <i>Actinobacteria</i>          | <i>Actinobacteria</i>    | <i>Bacteria</i> |

| OTU     | Av.A <sub>i</sub><br>(no) | Av.A <sub>i</sub><br>(serial) | Av.δ <sub>i</sub> | Av.δ <sub>i</sub> /SD | Av.δ <sub>i</sub> % | ΣAv.δ <sub>i</sub> % | Genus                                  | Family                                | Order                                 | Class                         | Phylum                     | Domain          |
|---------|---------------------------|-------------------------------|-------------------|-----------------------|---------------------|----------------------|----------------------------------------|---------------------------------------|---------------------------------------|-------------------------------|----------------------------|-----------------|
| Otu1027 | 0.2                       | 0                             | 0.07              | 0.49                  | 0.08                | 79.72                | unclass. <i>Epsilonproteobacteria</i>  | unclass. <i>Epsilonproteobacteria</i> | unclass. <i>Epsilonproteobacteria</i> | <i>Epsilonproteobacteria</i>  | <i>Proteobacteria</i>      | <i>Bacteria</i> |
| Otu1137 | 0.2                       | 0                             | 0.07              | 0.49                  | 0.08                | 79.8                 | unclass. <i>Gammaproteobacteria</i>    | unclass. <i>Gammaproteobacteria</i>   | unclass. <i>Gammaproteobacteria</i>   | <i>Gammaproteobacteria</i>    | <i>Proteobacteria</i>      | <i>Bacteria</i> |
| Otu1180 | 0.2                       | 0                             | 0.07              | 0.49                  | 0.08                | 79.88                | unclass. <i>Nitrosomonadaceae</i>      | <i>Nitrosomonadaceae</i>              | <i>Nitrosomonadales</i>               | <i>Betaproteobacteria</i>     | <i>Proteobacteria</i>      | <i>Bacteria</i> |
| Otu1211 | 0.2                       | 0                             | 0.07              | 0.49                  | 0.08                | 79.97                | unclass. <i>Oceanospirillaceae</i>     | <i>Oceanospirillaceae</i>             | <i>Oceanospirillales</i>              | <i>Gammaproteobacteria</i>    | <i>Proteobacteria</i>      | <i>Bacteria</i> |
| Otu1249 | 0.2                       | 0                             | 0.07              | 0.49                  | 0.08                | 80.05                | unclass. <i>Gammaproteobacteria</i>    | unclass. <i>Gammaproteobacteria</i>   | unclass. <i>Gammaproteobacteria</i>   | <i>Gammaproteobacteria</i>    | <i>Proteobacteria</i>      | <i>Bacteria</i> |
| Otu1505 | 0.2                       | 0                             | 0.07              | 0.49                  | 0.08                | 80.13                | unclass. <i>Desulfobacteraceae</i>     | <i>Desulfobacteraceae</i>             | <i>Desulfobacterales</i>              | <i>Deltaproteobacteria</i>    | <i>Proteobacteria</i>      | <i>Bacteria</i> |
| Otu1587 | 0.2                       | 0                             | 0.07              | 0.49                  | 0.08                | 80.21                | unclass. <i>Bacteria</i>               | unclass. <i>Bacteria</i>              | unclass. <i>Bacteria</i>              | unclass. <i>Bacteria</i>      | unclass. <i>Bacteria</i>   | <i>Bacteria</i> |
| Otu1774 | 0.2                       | 0                             | 0.07              | 0.49                  | 0.08                | 80.29                | unclass. <i>Flavobacteriaceae</i>      | <i>Flavobacteriaceae</i>              | <i>Flavobacteriales</i>               | <i>Flavobacteria</i>          | <i>Bacteroidetes</i>       | <i>Bacteria</i> |
| Otu1880 | 0.2                       | 0                             | 0.07              | 0.49                  | 0.08                | 80.37                | unclass. <i>Bacteria</i>               | unclass. <i>Bacteria</i>              | unclass. <i>Bacteria</i>              | unclass. <i>Bacteria</i>      | unclass. <i>Bacteria</i>   | <i>Bacteria</i> |
| Otu1881 | 0.2                       | 0                             | 0.07              | 0.49                  | 0.08                | 80.45                | unclass. <i>Bacteria</i>               | unclass. <i>Bacteria</i>              | unclass. <i>Bacteria</i>              | unclass. <i>Bacteria</i>      | unclass. <i>Bacteria</i>   | <i>Bacteria</i> |
| Otu1882 | 0.2                       | 0                             | 0.07              | 0.49                  | 0.08                | 80.53                | <i>Truepera</i>                        | <i>Trueperaceae</i>                   | <i>Deinococcales</i>                  | <i>Deinococci</i>             | <i>Deinococcus-Thermus</i> | <i>Bacteria</i> |
| Otu1885 | 0.2                       | 0                             | 0.07              | 0.49                  | 0.08                | 80.61                | unclass. <i>Gammaproteobacteria</i>    | unclass. <i>Gammaproteobacteria</i>   | unclass. <i>Gammaproteobacteria</i>   | <i>Gammaproteobacteria</i>    | <i>Proteobacteria</i>      | <i>Bacteria</i> |
| Otu1886 | 0.2                       | 0                             | 0.07              | 0.49                  | 0.08                | 80.69                | unclass. <i>Bacteria</i>               | unclass. <i>Bacteria</i>              | unclass. <i>Bacteria</i>              | unclass. <i>Bacteria</i>      | unclass. <i>Bacteria</i>   | <i>Bacteria</i> |
| Otu1888 | 0.2                       | 0                             | 0.07              | 0.49                  | 0.08                | 80.77                | unclass. <i>Bacteria</i>               | unclass. <i>Bacteria</i>              | unclass. <i>Bacteria</i>              | unclass. <i>Bacteria</i>      | unclass. <i>Bacteria</i>   | <i>Bacteria</i> |
| Otu1889 | 0.2                       | 0                             | 0.07              | 0.49                  | 0.08                | 80.85                | unclass. <i>Gammaproteobacteria</i>    | unclass. <i>Gammaproteobacteria</i>   | unclass. <i>Gammaproteobacteria</i>   | <i>Gammaproteobacteria</i>    | <i>Proteobacteria</i>      | <i>Bacteria</i> |
| Otu1890 | 0.2                       | 0                             | 0.07              | 0.49                  | 0.08                | 80.93                | unclass. <i>Bacteria</i>               | unclass. <i>Bacteria</i>              | unclass. <i>Bacteria</i>              | unclass. <i>Bacteria</i>      | unclass. <i>Bacteria</i>   | <i>Bacteria</i> |
| Otu1891 | 0.2                       | 0                             | 0.07              | 0.49                  | 0.08                | 81.01                | unclass. <i>Flavobacteriales</i>       | unclass. <i>Flavobacteriales</i>      | <i>Flavobacteriales</i>               | <i>Flavobacteria</i>          | <i>Bacteroidetes</i>       | <i>Bacteria</i> |
| Otu1892 | 0.2                       | 0                             | 0.07              | 0.49                  | 0.08                | 81.09                | unclass. <i>Bacteroidetes</i>          | unclass. <i>Bacteroidetes</i>         | unclass. <i>Bacteroidetes</i>         | unclass. <i>Bacteroidetes</i> | <i>Bacteroidetes</i>       | <i>Bacteria</i> |
| Otu1896 | 0.2                       | 0                             | 0.07              | 0.49                  | 0.08                | 81.18                | unclass. <i>Gammaproteobacteria</i>    | unclass. <i>Gammaproteobacteria</i>   | unclass. <i>Gammaproteobacteria</i>   | <i>Gammaproteobacteria</i>    | <i>Proteobacteria</i>      | <i>Bacteria</i> |
| Otu1898 | 0.2                       | 0                             | 0.07              | 0.49                  | 0.08                | 81.26                | <i>Winogradskyella</i>                 | <i>Flavobacteriaceae</i>              | <i>Flavobacteriales</i>               | <i>Flavobacteria</i>          | <i>Bacteroidetes</i>       | <i>Bacteria</i> |
| Otu1899 | 0.2                       | 0                             | 0.07              | 0.49                  | 0.08                | 81.34                | unclass. <i>Ectothiorhodospiraceae</i> | <i>Ectothiorhodospiraceae</i>         | <i>Chromatiales</i>                   | <i>Gammaproteobacteria</i>    | <i>Proteobacteria</i>      | <i>Bacteria</i> |
| Otu1900 | 0.2                       | 0                             | 0.07              | 0.49                  | 0.08                | 81.42                | unclass. <i>Flavobacteriaceae</i>      | <i>Flavobacteriaceae</i>              | <i>Flavobacteriales</i>               | <i>Flavobacteria</i>          | <i>Bacteroidetes</i>       | <i>Bacteria</i> |
| Otu1901 | 0.2                       | 0                             | 0.07              | 0.49                  | 0.08                | 81.5                 | <i>Glaciecola</i>                      | <i>Alteromonadaceae</i>               | <i>Alteromonadales</i>                | <i>Gammaproteobacteria</i>    | <i>Proteobacteria</i>      | <i>Bacteria</i> |
| Otu1902 | 0.2                       | 0                             | 0.07              | 0.49                  | 0.08                | 81.58                | unclass. <i>Bacteria</i>               | unclass. <i>Bacteria</i>              | unclass. <i>Bacteria</i>              | unclass. <i>Bacteria</i>      | unclass. <i>Bacteria</i>   | <i>Bacteria</i> |
| Otu1903 | 0.2                       | 0                             | 0.07              | 0.49                  | 0.08                | 81.66                | unclass. <i>Flavobacteriales</i>       | unclass. <i>Flavobacteriales</i>      | <i>Flavobacteriales</i>               | <i>Flavobacteria</i>          | <i>Bacteroidetes</i>       | <i>Bacteria</i> |
| Otu1904 | 0.2                       | 0                             | 0.07              | 0.49                  | 0.08                | 81.74                | unclass. <i>Flavobacteriales</i>       | unclass. <i>Flavobacteriales</i>      | <i>Flavobacteriales</i>               | <i>Flavobacteria</i>          | <i>Bacteroidetes</i>       | <i>Bacteria</i> |
| Otu1905 | 0.2                       | 0                             | 0.07              | 0.49                  | 0.08                | 81.82                | <i>Dasania</i>                         | <i>Pseudomonadales_incertae_sedis</i> | <i>Pseudomonadales</i>                | <i>Gammaproteobacteria</i>    | <i>Proteobacteria</i>      | <i>Bacteria</i> |

| OTU     | Av. A <sub>i</sub><br>(no) | Av. A <sub>i</sub><br>(serial) | Av. δ <sub>i</sub> | Av. δ <sub>i</sub> /SD | Av. δ <sub>i</sub> % | ΣAv. δ <sub>i</sub> % | Genus                               | Family                              | Order                               | Class                          | Phylum                   | Domain          |
|---------|----------------------------|--------------------------------|--------------------|------------------------|----------------------|-----------------------|-------------------------------------|-------------------------------------|-------------------------------------|--------------------------------|--------------------------|-----------------|
| Otu1906 | 0.2                        | 0                              | 0.07               | 0.49                   | 0.08                 | 81.9                  | unclass. <i>Bacteria</i>            | unclass. <i>Bacteria</i>            | unclass. <i>Bacteria</i>            | unclass. <i>Bacteria</i>       | unclass. <i>Bacteria</i> | <i>Bacteria</i> |
| Otu1907 | 0.2                        | 0                              | 0.07               | 0.49                   | 0.08                 | 81.98                 | unclass. <i>Flavobacteriaceae</i>   | <i>Flavobacteriaceae</i>            | <i>Flavobacteriales</i>             | <i>Flavobacteria</i>           | <i>Bacteroidetes</i>     | <i>Bacteria</i> |
| Otu1908 | 0.2                        | 0                              | 0.07               | 0.49                   | 0.08                 | 82.06                 | unclass. <i>Flavobacteriaceae</i>   | <i>Flavobacteriaceae</i>            | <i>Flavobacteriales</i>             | <i>Flavobacteria</i>           | <i>Bacteroidetes</i>     | <i>Bacteria</i> |
| Otu0573 | 0                          | 0.2                            | 0.07               | 0.49                   | 0.08                 | 82.14                 | <i>Thalassospira</i>                | <i>Rhodospirillaceae</i>            | <i>Rhodospirillales</i>             | <i>Alphaproteobacteria</i>     | <i>Proteobacteria</i>    | <i>Bacteria</i> |
| Otu1069 | 0                          | 0.2                            | 0.07               | 0.49                   | 0.08                 | 82.22                 | <i>Marinomonas</i>                  | <i>Oceanospirillaceae</i>           | <i>Oceanospirillales</i>            | <i>Gammaproteobacteria</i>     | <i>Proteobacteria</i>    | <i>Bacteria</i> |
| Otu1778 | 0                          | 0.2                            | 0.07               | 0.49                   | 0.08                 | 82.3                  | <i>Arcobacter</i>                   | <i>Campylobacteraceae</i>           | <i>Campylobacterales</i>            | <i>Epsilonproteobacteria</i>   | <i>Proteobacteria</i>    | <i>Bacteria</i> |
| Otu1779 | 0                          | 0.2                            | 0.07               | 0.49                   | 0.08                 | 82.37                 | <i>Marinomonas</i>                  | <i>Oceanospirillaceae</i>           | <i>Oceanospirillales</i>            | <i>Gammaproteobacteria</i>     | <i>Proteobacteria</i>    | <i>Bacteria</i> |
| Otu1784 | 0                          | 0.2                            | 0.07               | 0.49                   | 0.08                 | 82.45                 | unclass. <i>Gammaproteobacteria</i> | unclass. <i>Gammaproteobacteria</i> | unclass. <i>Gammaproteobacteria</i> | <i>Gammaproteobacteria</i>     | <i>Proteobacteria</i>    | <i>Bacteria</i> |
| Otu1785 | 0                          | 0.2                            | 0.07               | 0.49                   | 0.08                 | 82.53                 | <i>Colwellia</i>                    | <i>Colwelliaceae</i>                | <i>Alteromonadales</i>              | <i>Gammaproteobacteria</i>     | <i>Proteobacteria</i>    | <i>Bacteria</i> |
| Otu1786 | 0                          | 0.2                            | 0.07               | 0.49                   | 0.08                 | 82.61                 | unclass. <i>Gammaproteobacteria</i> | unclass. <i>Gammaproteobacteria</i> | unclass. <i>Gammaproteobacteria</i> | <i>Gammaproteobacteria</i>     | <i>Proteobacteria</i>    | <i>Bacteria</i> |
| Otu1787 | 0                          | 0.2                            | 0.07               | 0.49                   | 0.08                 | 82.69                 | unclass. <i>Gammaproteobacteria</i> | unclass. <i>Gammaproteobacteria</i> | unclass. <i>Gammaproteobacteria</i> | <i>Gammaproteobacteria</i>     | <i>Proteobacteria</i>    | <i>Bacteria</i> |
| Otu1064 | 0                          | 0.2                            | 0.07               | 0.49                   | 0.08                 | 82.76                 | <i>Marinomonas</i>                  | <i>Oceanospirillaceae</i>           | <i>Oceanospirillales</i>            | <i>Gammaproteobacteria</i>     | <i>Proteobacteria</i>    | <i>Bacteria</i> |
| Otu1790 | 0                          | 0.2                            | 0.07               | 0.49                   | 0.08                 | 82.84                 | unclass. <i>Bacteria</i>            | unclass. <i>Bacteria</i>            | unclass. <i>Bacteria</i>            | unclass. <i>Bacteria</i>       | unclass. <i>Bacteria</i> | <i>Bacteria</i> |
| Otu1791 | 0                          | 0.2                            | 0.07               | 0.49                   | 0.08                 | 82.92                 | <i>Colwellia</i>                    | <i>Colwelliaceae</i>                | <i>Alteromonadales</i>              | <i>Gammaproteobacteria</i>     | <i>Proteobacteria</i>    | <i>Bacteria</i> |
| Otu0546 | 0                          | 0.2                            | 0.07               | 0.49                   | 0.08                 | 83                    | unclass. <i>Bacteria</i>            | unclass. <i>Bacteria</i>            | unclass. <i>Bacteria</i>            | unclass. <i>Bacteria</i>       | unclass. <i>Bacteria</i> | <i>Bacteria</i> |
| Otu0562 | 0                          | 0.2                            | 0.07               | 0.49                   | 0.08                 | 83.07                 | <i>Maribacter</i>                   | <i>Flavobacteriaceae</i>            | <i>Flavobacteriales</i>             | <i>Flavobacteria</i>           | <i>Bacteroidetes</i>     | <i>Bacteria</i> |
| Otu0563 | 0                          | 0.2                            | 0.07               | 0.49                   | 0.08                 | 83.15                 | unclass. <i>Oceanospirillaceae</i>  | <i>Oceanospirillaceae</i>           | <i>Oceanospirillales</i>            | <i>Gammaproteobacteria</i>     | <i>Proteobacteria</i>    | <i>Bacteria</i> |
| Otu1260 | 0                          | 0.2                            | 0.07               | 0.49                   | 0.08                 | 83.23                 | <i>Marinobacterium</i>              | <i>Alteromonadaceae</i>             | <i>Alteromonadales</i>              | <i>Gammaproteobacteria</i>     | <i>Proteobacteria</i>    | <i>Bacteria</i> |
| Otu1788 | 0                          | 0.2                            | 0.07               | 0.49                   | 0.08                 | 83.3                  | <i>Colwellia</i>                    | <i>Colwelliaceae</i>                | <i>Alteromonadales</i>              | <i>Gammaproteobacteria</i>     | <i>Proteobacteria</i>    | <i>Bacteria</i> |
| Otu1798 | 0                          | 0.2                            | 0.07               | 0.49                   | 0.08                 | 83.38                 | unclass. <i>Alteromonadales</i>     | unclass. <i>Alteromonadales</i>     | <i>Alteromonadales</i>              | <i>Gammaproteobacteria</i>     | <i>Proteobacteria</i>    | <i>Bacteria</i> |
| Otu1799 | 0                          | 0.2                            | 0.07               | 0.49                   | 0.08                 | 83.46                 | unclass. <i>Gammaproteobacteria</i> | unclass. <i>Gammaproteobacteria</i> | unclass. <i>Gammaproteobacteria</i> | <i>Gammaproteobacteria</i>     | <i>Proteobacteria</i>    | <i>Bacteria</i> |
| Otu1800 | 0                          | 0.2                            | 0.07               | 0.49                   | 0.08                 | 83.54                 | unclass. <i>Alteromonadales</i>     | unclass. <i>Alteromonadales</i>     | <i>Alteromonadales</i>              | <i>Gammaproteobacteria</i>     | <i>Proteobacteria</i>    | <i>Bacteria</i> |
| Otu0011 | 0.2                        | 0                              | 0.07               | 0.49                   | 0.08                 | 83.61                 | unclass. <i>Flavobacteriaceae</i>   | <i>Flavobacteriaceae</i>            | <i>Flavobacteriales</i>             | <i>Flavobacteria</i>           | <i>Bacteroidetes</i>     | <i>Bacteria</i> |
| Otu0088 | 0.2                        | 0                              | 0.07               | 0.49                   | 0.08                 | 83.69                 | unclass. <i>Flavobacteriaceae</i>   | <i>Flavobacteriaceae</i>            | <i>Flavobacteriales</i>             | <i>Flavobacteria</i>           | <i>Bacteroidetes</i>     | <i>Bacteria</i> |
| Otu0108 | 0.2                        | 0                              | 0.07               | 0.49                   | 0.08                 | 83.77                 | unclass. <i>Colwelliaceae</i>       | <i>Colwelliaceae</i>                | <i>Alteromonadales</i>              | <i>Gammaproteobacteria</i>     | <i>Proteobacteria</i>    | <i>Bacteria</i> |
| Otu0150 | 0.2                        | 0                              | 0.07               | 0.49                   | 0.08                 | 83.84                 | unclass. <i>Bacteria</i>            | unclass. <i>Bacteria</i>            | unclass. <i>Bacteria</i>            | unclass. <i>Bacteria</i>       | unclass. <i>Bacteria</i> | <i>Bacteria</i> |
| Otu0190 | 0.2                        | 0                              | 0.07               | 0.49                   | 0.08                 | 83.92                 | unclass. <i>Proteobacteria</i>      | unclass. <i>Proteobacteria</i>      | unclass. <i>Proteobacteria</i>      | unclass. <i>Proteobacteria</i> | <i>Proteobacteria</i>    | <i>Bacteria</i> |



| OTU     | Av. A <sub>i</sub><br>(no) | Av. A <sub>i</sub><br>(serial) | Av. δ <sub>i</sub> | Av. δ <sub>i</sub> /SD | Av. δ <sub>i</sub> % | ΣAv. δ <sub>i</sub> % | Genus                               | Family                              | Order                               | Class                         | Phylum                   | Domain          |
|---------|----------------------------|--------------------------------|--------------------|------------------------|----------------------|-----------------------|-------------------------------------|-------------------------------------|-------------------------------------|-------------------------------|--------------------------|-----------------|
| Otu0221 | 0.2                        | 0                              | 0.07               | 0.49                   | 0.08                 | 84                    | unclass. <i>Flavobacteriaceae</i>   | <i>Flavobacteriaceae</i>            | <i>Flavobacteriales</i>             | <i>Flavobacteria</i>          | <i>Bacteroidetes</i>     | <i>Bacteria</i> |
| Otu0229 | 0.2                        | 0                              | 0.07               | 0.49                   | 0.08                 | 84.08                 | unclass. <i>Saprospiraceae</i>      | <i>Saprospiraceae</i>               | <i>Sphingobacteriales</i>           | <i>Sphingobacteria</i>        | <i>Bacteroidetes</i>     | <i>Bacteria</i> |
| Otu0231 | 0.2                        | 0                              | 0.07               | 0.49                   | 0.08                 | 84.15                 | unclass. <i>Gammaproteobacteria</i> | unclass. <i>Gammaproteobacteria</i> | unclass. <i>Gammaproteobacteria</i> | <i>Gammaproteobacteria</i>    | <i>Proteobacteria</i>    | <i>Bacteria</i> |
| Otu0238 | 0.2                        | 0                              | 0.07               | 0.49                   | 0.08                 | 84.23                 | <i>Haliae</i>                       | <i>Alteromonadaceae</i>             | <i>Alteromonadales</i>              | <i>Gammaproteobacteria</i>    | <i>Proteobacteria</i>    | <i>Bacteria</i> |
| Otu0242 | 0.2                        | 0                              | 0.07               | 0.49                   | 0.08                 | 84.31                 | unclass. <i>Gammaproteobacteria</i> | unclass. <i>Gammaproteobacteria</i> | unclass. <i>Gammaproteobacteria</i> | <i>Gammaproteobacteria</i>    | <i>Proteobacteria</i>    | <i>Bacteria</i> |
| Otu0278 | 0.2                        | 0                              | 0.07               | 0.49                   | 0.08                 | 84.38                 | unclass. <i>Gammaproteobacteria</i> | unclass. <i>Gammaproteobacteria</i> | unclass. <i>Gammaproteobacteria</i> | <i>Gammaproteobacteria</i>    | <i>Proteobacteria</i>    | <i>Bacteria</i> |
| Otu0302 | 0.2                        | 0                              | 0.07               | 0.49                   | 0.08                 | 84.46                 | <i>Colwellia</i>                    | <i>Colwelliaceae</i>                | <i>Alteromonadales</i>              | <i>Gammaproteobacteria</i>    | <i>Proteobacteria</i>    | <i>Bacteria</i> |
| Otu0312 | 0.2                        | 0                              | 0.07               | 0.49                   | 0.08                 | 84.54                 | unclass. <i>Oceanospirillaceae</i>  | <i>Oceanospirillaceae</i>           | <i>Oceanospirillales</i>            | <i>Gammaproteobacteria</i>    | <i>Proteobacteria</i>    | <i>Bacteria</i> |
| Otu0315 | 0.2                        | 0                              | 0.07               | 0.49                   | 0.08                 | 84.61                 | unclass. <i>Gammaproteobacteria</i> | unclass. <i>Gammaproteobacteria</i> | unclass. <i>Gammaproteobacteria</i> | <i>Gammaproteobacteria</i>    | <i>Proteobacteria</i>    | <i>Bacteria</i> |
| Otu0334 | 0.2                        | 0                              | 0.07               | 0.49                   | 0.08                 | 84.69                 | unclass. <i>Flavobacteriaceae</i>   | <i>Flavobacteriaceae</i>            | <i>Flavobacteriales</i>             | <i>Flavobacteria</i>          | <i>Bacteroidetes</i>     | <i>Bacteria</i> |
| Otu0335 | 0.2                        | 0                              | 0.07               | 0.49                   | 0.08                 | 84.77                 | unclass. <i>Flavobacteriaceae</i>   | <i>Flavobacteriaceae</i>            | <i>Flavobacteriales</i>             | <i>Flavobacteria</i>          | <i>Bacteroidetes</i>     | <i>Bacteria</i> |
| Otu0565 | 0.2                        | 0                              | 0.07               | 0.49                   | 0.08                 | 84.85                 | <i>Staphylococcus</i>               | <i>Staphylococcaceae</i>            | <i>Bacillales</i>                   | <i>Bacilli</i>                | <i>Firmicutes</i>        | <i>Bacteria</i> |
| Otu0618 | 0.2                        | 0                              | 0.07               | 0.49                   | 0.08                 | 84.92                 | <i>Glaciecola</i>                   | <i>Alteromonadaceae</i>             | <i>Alteromonadales</i>              | <i>Gammaproteobacteria</i>    | <i>Proteobacteria</i>    | <i>Bacteria</i> |
| Otu0760 | 0.2                        | 0                              | 0.07               | 0.49                   | 0.08                 | 85                    | unclass. <i>Bacteria</i>            | unclass. <i>Bacteria</i>            | unclass. <i>Bacteria</i>            | unclass. <i>Bacteria</i>      | unclass. <i>Bacteria</i> | <i>Bacteria</i> |
| Otu0780 | 0.2                        | 0                              | 0.07               | 0.49                   | 0.08                 | 85.08                 | unclass. <i>Gammaproteobacteria</i> | unclass. <i>Gammaproteobacteria</i> | unclass. <i>Gammaproteobacteria</i> | <i>Gammaproteobacteria</i>    | <i>Proteobacteria</i>    | <i>Bacteria</i> |
| Otu0798 | 0.2                        | 0                              | 0.07               | 0.49                   | 0.08                 | 85.15                 | unclass. <i>Gammaproteobacteria</i> | unclass. <i>Gammaproteobacteria</i> | unclass. <i>Gammaproteobacteria</i> | <i>Gammaproteobacteria</i>    | <i>Proteobacteria</i>    | <i>Bacteria</i> |
| Otu1052 | 0.2                        | 0                              | 0.07               | 0.49                   | 0.08                 | 85.23                 | unclass. <i>Desulfobacteraceae</i>  | <i>Desulfobacteraceae</i>           | <i>Desulfobacterales</i>            | <i>Deltaproteobacteria</i>    | <i>Proteobacteria</i>    | <i>Bacteria</i> |
| Otu1115 | 0.2                        | 0                              | 0.07               | 0.49                   | 0.08                 | 85.31                 | <i>Marinobacter</i>                 | <i>Alteromonadaceae</i>             | <i>Alteromonadales</i>              | <i>Gammaproteobacteria</i>    | <i>Proteobacteria</i>    | <i>Bacteria</i> |
| Otu1204 | 0.2                        | 0                              | 0.07               | 0.49                   | 0.08                 | 85.38                 | unclass. <i>Bacteroidetes</i>       | unclass. <i>Bacteroidetes</i>       | unclass. <i>Bacteroidetes</i>       | unclass. <i>Bacteroidetes</i> | <i>Bacteroidetes</i>     | <i>Bacteria</i> |
| Otu1246 | 0.2                        | 0                              | 0.07               | 0.49                   | 0.08                 | 85.46                 | unclass. <i>Gammaproteobacteria</i> | unclass. <i>Gammaproteobacteria</i> | unclass. <i>Gammaproteobacteria</i> | <i>Gammaproteobacteria</i>    | <i>Proteobacteria</i>    | <i>Bacteria</i> |
| Otu1403 | 0.2                        | 0                              | 0.07               | 0.49                   | 0.08                 | 85.54                 | unclass. <i>Bacteroidetes</i>       | unclass. <i>Bacteroidetes</i>       | unclass. <i>Bacteroidetes</i>       | unclass. <i>Bacteroidetes</i> | <i>Bacteroidetes</i>     | <i>Bacteria</i> |
| Otu1620 | 0.2                        | 0                              | 0.07               | 0.49                   | 0.08                 | 85.62                 | <i>Nitrospira</i>                   | <i>Nitrospiraceae</i>               | <i>Nitrospirales</i>                | <i>Nitrospira</i>             | <i>Nitrospira</i>        | <i>Bacteria</i> |
| Otu1741 | 0.2                        | 0                              | 0.07               | 0.49                   | 0.08                 | 85.69                 | <i>Pelagibacter</i>                 | SAR11-clade                         | <i>Rickettsiales</i>                | <i>Alphaproteobacteria</i>    | <i>Proteobacteria</i>    | <i>Bacteria</i> |
| Otu1775 | 0.2                        | 0                              | 0.07               | 0.49                   | 0.08                 | 85.77                 | unclass. <i>Bacteria</i>            | unclass. <i>Bacteria</i>            | unclass. <i>Bacteria</i>            | unclass. <i>Bacteria</i>      | unclass. <i>Bacteria</i> | <i>Bacteria</i> |
| Otu1894 | 0.2                        | 0                              | 0.07               | 0.49                   | 0.08                 | 85.85                 | <i>Colwellia</i>                    | <i>Colwelliaceae</i>                | <i>Alteromonadales</i>              | <i>Gammaproteobacteria</i>    | <i>Proteobacteria</i>    | <i>Bacteria</i> |
| Otu1911 | 0.2                        | 0                              | 0.07               | 0.49                   | 0.08                 | 85.92                 | unclass. <i>Flavobacteriales</i>    | unclass. <i>Flavobacteriales</i>    | <i>Flavobacteriales</i>             | <i>Flavobacteria</i>          | <i>Bacteroidetes</i>     | <i>Bacteria</i> |
| Otu1912 | 0.2                        | 0                              | 0.07               | 0.49                   | 0.08                 | 86                    | <i>Pelagibacter</i>                 | SAR11-clade                         | <i>Rickettsiales</i>                | <i>Alphaproteobacteria</i>    | <i>Proteobacteria</i>    | <i>Bacteria</i> |

| OTU     | Av. A <sub>i</sub><br>(no) | Av. A <sub>i</sub><br>(serial) | Av. δ <sub>i</sub> | Av. δ <sub>i</sub> /SD | Av. δ <sub>i</sub> % | ΣAv. δ <sub>i</sub> % | Genus                               | Family                              | Order                               | Class                          | Phylum                   | Domain          |
|---------|----------------------------|--------------------------------|--------------------|------------------------|----------------------|-----------------------|-------------------------------------|-------------------------------------|-------------------------------------|--------------------------------|--------------------------|-----------------|
| Otu1914 | 0.2                        | 0                              | 0.07               | 0.49                   | 0.08                 | 86.08                 | <i>Microscilla</i>                  | <i>Cytophagaceae</i>                | <i>Sphingobacteriales</i>           | <i>Sphingobacteria</i>         | <i>Bacteroidetes</i>     | <i>Bacteria</i> |
| Otu1915 | 0.2                        | 0                              | 0.07               | 0.49                   | 0.08                 | 86.15                 | unclass. <i>Proteobacteria</i>      | unclass. <i>Proteobacteria</i>      | unclass. <i>Proteobacteria</i>      | unclass. <i>Proteobacteria</i> | <i>Proteobacteria</i>    | <i>Bacteria</i> |
| Otu1917 | 0.2                        | 0                              | 0.07               | 0.49                   | 0.08                 | 86.23                 | unclass. <i>Bacteria</i>            | unclass. <i>Bacteria</i>            | unclass. <i>Bacteria</i>            | unclass. <i>Bacteria</i>       | unclass. <i>Bacteria</i> | <i>Bacteria</i> |
| Otu1918 | 0.2                        | 0                              | 0.07               | 0.49                   | 0.08                 | 86.31                 | unclass. <i>Flavobacteriaceae</i>   | <i>Flavobacteriaceae</i>            | <i>Flavobacteriales</i>             | <i>Flavobacteria</i>           | <i>Bacteroidetes</i>     | <i>Bacteria</i> |
| Otu1919 | 0.2                        | 0                              | 0.07               | 0.49                   | 0.08                 | 86.39                 | unclass. <i>Bacteroidetes</i>       | unclass. <i>Bacteroidetes</i>       | unclass. <i>Bacteroidetes</i>       | unclass. <i>Bacteroidetes</i>  | <i>Bacteroidetes</i>     | <i>Bacteria</i> |
| Otu1921 | 0.2                        | 0                              | 0.07               | 0.49                   | 0.08                 | 86.46                 | unclass. <i>Bacteria</i>            | unclass. <i>Bacteria</i>            | unclass. <i>Bacteria</i>            | unclass. <i>Bacteria</i>       | unclass. <i>Bacteria</i> | <i>Bacteria</i> |
| Otu1923 | 0.2                        | 0                              | 0.07               | 0.49                   | 0.08                 | 86.54                 | unclass. <i>Bacteria</i>            | unclass. <i>Bacteria</i>            | unclass. <i>Bacteria</i>            | unclass. <i>Bacteria</i>       | unclass. <i>Bacteria</i> | <i>Bacteria</i> |
| Otu1924 | 0.2                        | 0                              | 0.07               | 0.49                   | 0.08                 | 86.62                 | unclass. <i>Bacteria</i>            | unclass. <i>Bacteria</i>            | unclass. <i>Bacteria</i>            | unclass. <i>Bacteria</i>       | unclass. <i>Bacteria</i> | <i>Bacteria</i> |
| Otu1925 | 0.2                        | 0                              | 0.07               | 0.49                   | 0.08                 | 86.69                 | unclass. <i>Gammaproteobacteria</i> | unclass. <i>Gammaproteobacteria</i> | unclass. <i>Gammaproteobacteria</i> | <i>Gammaproteobacteria</i>     | <i>Proteobacteria</i>    | <i>Bacteria</i> |
| Otu1926 | 0.2                        | 0                              | 0.07               | 0.49                   | 0.08                 | 86.77                 | unclass. <i>Flavobacteriaceae</i>   | <i>Flavobacteriaceae</i>            | <i>Flavobacteriales</i>             | <i>Flavobacteria</i>           | <i>Bacteroidetes</i>     | <i>Bacteria</i> |
| Otu1927 | 0.2                        | 0                              | 0.07               | 0.49                   | 0.08                 | 86.85                 | unclass. <i>Flavobacteriales</i>    | unclass. <i>Flavobacteriales</i>    | <i>Flavobacteriales</i>             | <i>Flavobacteria</i>           | <i>Bacteroidetes</i>     | <i>Bacteria</i> |
| Otu1928 | 0.2                        | 0                              | 0.07               | 0.49                   | 0.08                 | 86.92                 | unclass. <i>Flavobacteriales</i>    | unclass. <i>Flavobacteriales</i>    | <i>Flavobacteriales</i>             | <i>Flavobacteria</i>           | <i>Bacteroidetes</i>     | <i>Bacteria</i> |
| Otu1929 | 0.2                        | 0                              | 0.07               | 0.49                   | 0.08                 | 87                    | unclass. OD1                        | unclass. OD1                        | unclass. OD1                        | unclass. OD1                   | OD1                      | <i>Bacteria</i> |
| Otu1930 | 0.2                        | 0                              | 0.07               | 0.49                   | 0.08                 | 87.08                 | unclass. <i>Flavobacteriaceae</i>   | <i>Flavobacteriaceae</i>            | <i>Flavobacteriales</i>             | <i>Flavobacteria</i>           | <i>Bacteroidetes</i>     | <i>Bacteria</i> |
| Otu1931 | 0.2                        | 0                              | 0.07               | 0.49                   | 0.08                 | 87.16                 | unclass. <i>Bacteria</i>            | unclass. <i>Bacteria</i>            | unclass. <i>Bacteria</i>            | unclass. <i>Bacteria</i>       | unclass. <i>Bacteria</i> | <i>Bacteria</i> |
| Otu1932 | 0.2                        | 0                              | 0.07               | 0.49                   | 0.08                 | 87.23                 | unclass. <i>Bacteria</i>            | unclass. <i>Bacteria</i>            | unclass. <i>Bacteria</i>            | unclass. <i>Bacteria</i>       | unclass. <i>Bacteria</i> | <i>Bacteria</i> |
| Otu1933 | 0.2                        | 0                              | 0.07               | 0.49                   | 0.08                 | 87.31                 | unclass. <i>Flavobacteriaceae</i>   | <i>Flavobacteriaceae</i>            | <i>Flavobacteriales</i>             | <i>Flavobacteria</i>           | <i>Bacteroidetes</i>     | <i>Bacteria</i> |
| Otu1934 | 0.2                        | 0                              | 0.07               | 0.49                   | 0.08                 | 87.39                 | unclass. <i>Flavobacteriaceae</i>   | <i>Flavobacteriaceae</i>            | <i>Flavobacteriales</i>             | <i>Flavobacteria</i>           | <i>Bacteroidetes</i>     | <i>Bacteria</i> |
| Otu1936 | 0.2                        | 0                              | 0.07               | 0.49                   | 0.08                 | 87.46                 | unclass. <i>Gammaproteobacteria</i> | unclass. <i>Gammaproteobacteria</i> | unclass. <i>Gammaproteobacteria</i> | <i>Gammaproteobacteria</i>     | <i>Proteobacteria</i>    | <i>Bacteria</i> |
| Otu1938 | 0.2                        | 0                              | 0.07               | 0.49                   | 0.08                 | 87.54                 | unclass. <i>Planctomycetaceae</i>   | <i>Planctomycetaceae</i>            | <i>Planctomycetales</i>             | <i>Planctomycetacia</i>        | <i>Planctomycetes</i>    | <i>Bacteria</i> |
| Otu0525 | 0                          | 0.2                            | 0.07               | 0.49                   | 0.08                 | 87.62                 | <i>Reinekea</i>                     | <i>Oceanospirillaceae</i>           | <i>Oceanospirillales</i>            | <i>Gammaproteobacteria</i>     | <i>Proteobacteria</i>    | <i>Bacteria</i> |
| Otu1792 | 0                          | 0.2                            | 0.07               | 0.49                   | 0.08                 | 87.69                 | <i>Colwellia</i>                    | <i>Colwelliaceae</i>                | <i>Alteromonadales</i>              | <i>Gammaproteobacteria</i>     | <i>Proteobacteria</i>    | <i>Bacteria</i> |
| Otu1793 | 0                          | 0.2                            | 0.07               | 0.49                   | 0.08                 | 87.77                 | unclass. <i>Gammaproteobacteria</i> | unclass. <i>Gammaproteobacteria</i> | unclass. <i>Gammaproteobacteria</i> | <i>Gammaproteobacteria</i>     | <i>Proteobacteria</i>    | <i>Bacteria</i> |
| Otu0031 | 0.2                        | 0                              | 0.07               | 0.49                   | 0.08                 | 87.84                 | unclass. <i>Gammaproteobacteria</i> | unclass. <i>Gammaproteobacteria</i> | unclass. <i>Gammaproteobacteria</i> | <i>Gammaproteobacteria</i>     | <i>Proteobacteria</i>    | <i>Bacteria</i> |
| Otu0070 | 0.2                        | 0                              | 0.07               | 0.49                   | 0.08                 | 87.92                 | <i>Winogradskyella</i>              | <i>Flavobacteriaceae</i>            | <i>Flavobacteriales</i>             | <i>Flavobacteria</i>           | <i>Bacteroidetes</i>     | <i>Bacteria</i> |
| Otu0142 | 0.2                        | 0                              | 0.07               | 0.49                   | 0.08                 | 88                    | unclass. <i>Gammaproteobacteria</i> | unclass. <i>Gammaproteobacteria</i> | unclass. <i>Gammaproteobacteria</i> | <i>Gammaproteobacteria</i>     | <i>Proteobacteria</i>    | <i>Bacteria</i> |
| Otu0144 | 0.2                        | 0                              | 0.07               | 0.49                   | 0.08                 | 88.07                 | <i>Lewinella</i>                    | <i>Saprospiraceae</i>               | <i>Sphingobacteriales</i>           | <i>Sphingobacteria</i>         | <i>Bacteroidetes</i>     | <i>Bacteria</i> |

| OTU     | Av. A <sub>i</sub><br>(no) | Av. A <sub>i</sub><br>(serial) | Av. δ <sub>i</sub> | Av. δ <sub>i</sub> /SD | Av. δ <sub>i</sub> % | ΣAv. δ <sub>i</sub> % | Genus                                 | Family                                | Order                                 | Class                          | Phylum                   | Domain          |
|---------|----------------------------|--------------------------------|--------------------|------------------------|----------------------|-----------------------|---------------------------------------|---------------------------------------|---------------------------------------|--------------------------------|--------------------------|-----------------|
| Otu0211 | 0.2                        | 0                              | 0.07               | 0.49                   | 0.08                 | 88.15                 | unclass. <i>Alphaproteobacteria</i>   | unclass. <i>Alphaproteobacteria</i>   | unclass. <i>Alphaproteobacteria</i>   | <i>Alphaproteobacteria</i>     | <i>Proteobacteria</i>    | <i>Bacteria</i> |
| Otu0213 | 0.2                        | 0                              | 0.07               | 0.49                   | 0.08                 | 88.22                 | unclass. <i>Gammaproteobacteria</i>   | unclass. <i>Gammaproteobacteria</i>   | unclass. <i>Gammaproteobacteria</i>   | <i>Gammaproteobacteria</i>     | <i>Proteobacteria</i>    | <i>Bacteria</i> |
| Otu0247 | 0.2                        | 0                              | 0.07               | 0.49                   | 0.08                 | 88.3                  | unclass. <i>Flavobacteriaceae</i>     | <i>Flavobacteriaceae</i>              | <i>Flavobacteriales</i>               | <i>Flavobacteria</i>           | <i>Bacteroidetes</i>     | <i>Bacteria</i> |
| Otu0308 | 0.2                        | 0                              | 0.07               | 0.49                   | 0.08                 | 88.37                 | unclass. <i>Gammaproteobacteria</i>   | unclass. <i>Gammaproteobacteria</i>   | unclass. <i>Gammaproteobacteria</i>   | <i>Gammaproteobacteria</i>     | <i>Proteobacteria</i>    | <i>Bacteria</i> |
| Otu0321 | 0.2                        | 0                              | 0.07               | 0.49                   | 0.08                 | 88.45                 | unclass. <i>Alphaproteobacteria</i>   | unclass. <i>Alphaproteobacteria</i>   | unclass. <i>Alphaproteobacteria</i>   | <i>Alphaproteobacteria</i>     | <i>Proteobacteria</i>    | <i>Bacteria</i> |
| Otu0331 | 0.2                        | 0                              | 0.07               | 0.49                   | 0.08                 | 88.53                 | unclass. <i>Gammaproteobacteria</i>   | unclass. <i>Gammaproteobacteria</i>   | unclass. <i>Gammaproteobacteria</i>   | <i>Gammaproteobacteria</i>     | <i>Proteobacteria</i>    | <i>Bacteria</i> |
| Otu0361 | 0.2                        | 0                              | 0.07               | 0.49                   | 0.08                 | 88.6                  | unclass. <i>Flavobacteriaceae</i>     | <i>Flavobacteriaceae</i>              | <i>Flavobacteriales</i>               | <i>Flavobacteria</i>           | <i>Bacteroidetes</i>     | <i>Bacteria</i> |
| Otu0373 | 0.2                        | 0                              | 0.07               | 0.49                   | 0.08                 | 88.68                 | unclass. <i>Bacteria</i>              | unclass. <i>Bacteria</i>              | unclass. <i>Bacteria</i>              | unclass. <i>Bacteria</i>       | unclass. <i>Bacteria</i> | <i>Bacteria</i> |
| Otu0389 | 0.2                        | 0                              | 0.07               | 0.49                   | 0.08                 | 88.75                 | unclass. <i>Flavobacteriaceae</i>     | <i>Flavobacteriaceae</i>              | <i>Flavobacteriales</i>               | <i>Flavobacteria</i>           | <i>Bacteroidetes</i>     | <i>Bacteria</i> |
| Otu0421 | 0.2                        | 0                              | 0.07               | 0.49                   | 0.08                 | 88.83                 | unclass. <i>Gammaproteobacteria</i>   | unclass. <i>Gammaproteobacteria</i>   | unclass. <i>Gammaproteobacteria</i>   | <i>Gammaproteobacteria</i>     | <i>Proteobacteria</i>    | <i>Bacteria</i> |
| Otu0461 | 0.2                        | 0                              | 0.07               | 0.49                   | 0.08                 | 88.9                  | unclass. <i>Microbacteriaceae</i>     | <i>Microbacteriaceae</i>              | <i>Actinomycetales</i>                | <i>Actinobacteria</i>          | <i>Actinobacteria</i>    | <i>Bacteria</i> |
| Otu0498 | 0.2                        | 0                              | 0.07               | 0.49                   | 0.08                 | 88.98                 | unclass. <i>Flavobacteriales</i>      | unclass. <i>Flavobacteriales</i>      | <i>Flavobacteriales</i>               | <i>Flavobacteria</i>           | <i>Bacteroidetes</i>     | <i>Bacteria</i> |
| Otu0717 | 0.2                        | 0                              | 0.07               | 0.49                   | 0.08                 | 89.06                 | unclass. <i>Rhodobacteraceae</i>      | <i>Rhodobacteraceae</i>               | <i>Rhodobacterales</i>                | <i>Alphaproteobacteria</i>     | <i>Proteobacteria</i>    | <i>Bacteria</i> |
| Otu0873 | 0.2                        | 0                              | 0.07               | 0.49                   | 0.08                 | 89.13                 | unclass. <i>Gammaproteobacteria</i>   | unclass. <i>Gammaproteobacteria</i>   | unclass. <i>Gammaproteobacteria</i>   | <i>Gammaproteobacteria</i>     | <i>Proteobacteria</i>    | <i>Bacteria</i> |
| Otu0895 | 0.2                        | 0                              | 0.07               | 0.49                   | 0.08                 | 89.21                 | unclass. <i>Actinobacteria</i>        | unclass. <i>Actinobacteria</i>        | unclass. <i>Actinobacteria</i>        | <i>Actinobacteria</i>          | <i>Actinobacteria</i>    | <i>Bacteria</i> |
| Otu1004 | 0.2                        | 0                              | 0.07               | 0.49                   | 0.08                 | 89.28                 | unclass. <i>Gammaproteobacteria</i>   | unclass. <i>Gammaproteobacteria</i>   | unclass. <i>Gammaproteobacteria</i>   | <i>Gammaproteobacteria</i>     | <i>Proteobacteria</i>    | <i>Bacteria</i> |
| Otu1229 | 0.2                        | 0                              | 0.07               | 0.49                   | 0.08                 | 89.36                 | <i>Haliea</i>                         | <i>Alteromonadaceae</i>               | <i>Alteromonadales</i>                | <i>Gammaproteobacteria</i>     | <i>Proteobacteria</i>    | <i>Bacteria</i> |
| Otu1362 | 0.2                        | 0                              | 0.07               | 0.49                   | 0.08                 | 89.43                 | unclass. <i>Bacteria</i>              | unclass. <i>Bacteria</i>              | unclass. <i>Bacteria</i>              | unclass. <i>Bacteria</i>       | unclass. <i>Bacteria</i> | <i>Bacteria</i> |
| Otu1683 | 0.2                        | 0                              | 0.07               | 0.49                   | 0.08                 | 89.51                 | unclass. <i>Gammaproteobacteria</i>   | unclass. <i>Gammaproteobacteria</i>   | unclass. <i>Gammaproteobacteria</i>   | <i>Gammaproteobacteria</i>     | <i>Proteobacteria</i>    | <i>Bacteria</i> |
| Otu1687 | 0.2                        | 0                              | 0.07               | 0.49                   | 0.08                 | 89.59                 | <i>Haliea</i>                         | <i>Alteromonadaceae</i>               | <i>Alteromonadales</i>                | <i>Gammaproteobacteria</i>     | <i>Proteobacteria</i>    | <i>Bacteria</i> |
| Otu1699 | 0.2                        | 0                              | 0.07               | 0.49                   | 0.08                 | 89.66                 | <i>Flavobacterium</i>                 | <i>Flavobacteriaceae</i>              | <i>Flavobacteriales</i>               | <i>Flavobacteria</i>           | <i>Bacteroidetes</i>     | <i>Bacteria</i> |
| Otu1703 | 0.2                        | 0                              | 0.07               | 0.49                   | 0.08                 | 89.74                 | unclass. <i>Proteobacteria</i>        | unclass. <i>Proteobacteria</i>        | unclass. <i>Proteobacteria</i>        | unclass. <i>Proteobacteria</i> | <i>Proteobacteria</i>    | <i>Bacteria</i> |
| Otu1735 | 0.2                        | 0                              | 0.07               | 0.49                   | 0.08                 | 89.81                 | <i>Sulfurovum</i>                     | <i>Helicobacteraceae</i>              | <i>Campylobacterales</i>              | <i>Epsilonproteobacteria</i>   | <i>Proteobacteria</i>    | <i>Bacteria</i> |
| Otu1748 | 0.2                        | 0                              | 0.07               | 0.49                   | 0.08                 | 89.89                 | unclass. <i>Epsilonproteobacteria</i> | unclass. <i>Epsilonproteobacteria</i> | unclass. <i>Epsilonproteobacteria</i> | <i>Epsilonproteobacteria</i>   | <i>Proteobacteria</i>    | <i>Bacteria</i> |
| Otu1817 | 0.2                        | 0                              | 0.07               | 0.49                   | 0.08                 | 89.96                 | unclass. <i>Flavobacteriaceae</i>     | <i>Flavobacteriaceae</i>              | <i>Flavobacteriales</i>               | <i>Flavobacteria</i>           | <i>Bacteroidetes</i>     | <i>Bacteria</i> |
| Otu1820 | 0.2                        | 0                              | 0.07               | 0.49                   | 0.08                 | 90.04                 | <i>Glaciecola</i>                     | <i>Alteromonadaceae</i>               | <i>Alteromonadales</i>                | <i>Gammaproteobacteria</i>     | <i>Proteobacteria</i>    | <i>Bacteria</i> |

| OTU                                                                                          | Av.A <sub>i</sub><br>(no) | Av. <sub>i</sub><br>(initial) | Av.δ <sub>i</sub> | Av.δ/SD | Av.δ <sub>i</sub> % | ΣAv.δ <sub>i</sub> % | Genus                               | Family                              | Order                               | Class                      | Phylum                   | Domain          |
|----------------------------------------------------------------------------------------------|---------------------------|-------------------------------|-------------------|---------|---------------------|----------------------|-------------------------------------|-------------------------------------|-------------------------------------|----------------------------|--------------------------|-----------------|
| Summer pH <i>in situ</i> 'no dilution' vs. 'initial dilution' (average dissimilarity: 95.7%) |                           |                               |                   |         |                     |                      |                                     |                                     |                                     |                            |                          |                 |
| Otu0109                                                                                      | 0                         | 18.3                          | 7.68              | 8.57    | 8.03                | 8.03                 | <i>Alteromonas</i>                  | <i>Alteromonadaceae</i>             | <i>Alteromonadales</i>              | <i>Gammaproteobacteria</i> | <i>Proteobacteria</i>    | <i>Bacteria</i> |
| Otu0005                                                                                      | 15.27                     | 0.2                           | 6.32              | 8.24    | 6.6                 | 14.63                | <i>Pelagibacter</i>                 | SAR11-clade                         | <i>Rickettsiales</i>                | <i>Alphaproteobacteria</i> | <i>Proteobacteria</i>    | <i>Bacteria</i> |
| Otu0691                                                                                      | 5.44                      | 0                             | 2.26              | 3.72    | 2.37                | 17                   | <i>Planctomyces</i>                 | <i>Planctomycetaceae</i>            | <i>Planctomycetales</i>             | <i>Planctomycetacia</i>    | <i>Planctomycetes</i>    | <i>Bacteria</i> |
| Otu0001                                                                                      | 4.58                      | 0                             | 1.92              | 4.45    | 2.01                | 19.01                | unclass. <i>Flavobacteriaceae</i>   | <i>Flavobacteriaceae</i>            | <i>Flavobacteriales</i>             | <i>Flavobacteria</i>       | <i>Bacteroidetes</i>     | <i>Bacteria</i> |
| Otu0035                                                                                      | 0.2                       | 3.47                          | 1.36              | 3.76    | 1.43                | 20.43                | <i>Colwellia</i>                    | <i>Colwelliaceae</i>                | <i>Alteromonadales</i>              | <i>Gammaproteobacteria</i> | <i>Proteobacteria</i>    | <i>Bacteria</i> |
| Otu0693                                                                                      | 3.22                      | 0                             | 1.35              | 2.21    | 1.41                | 21.84                | <i>Planctomyces</i>                 | <i>Planctomycetaceae</i>            | <i>Planctomycetales</i>             | <i>Planctomycetacia</i>    | <i>Planctomycetes</i>    | <i>Bacteria</i> |
| Otu0041                                                                                      | 0.75                      | 3.93                          | 1.35              | 1.77    | 1.41                | 23.25                | <i>Sulfitobacter</i>                | <i>Rhodobacteraceae</i>             | <i>Rhodobacterales</i>              | <i>Alphaproteobacteria</i> | <i>Proteobacteria</i>    | <i>Bacteria</i> |
| Otu0003                                                                                      | 3.21                      | 0                             | 1.35              | 7.21    | 1.41                | 24.66                | unclass. <i>Rhodobacteraceae</i>    | <i>Rhodobacteraceae</i>             | <i>Rhodobacterales</i>              | <i>Alphaproteobacteria</i> | <i>Proteobacteria</i>    | <i>Bacteria</i> |
| Otu0203                                                                                      | 3.14                      | 0                             | 1.32              | 2.73    | 1.38                | 26.04                | <i>Pelagibacter</i>                 | SAR11-clade                         | <i>Rickettsiales</i>                | <i>Alphaproteobacteria</i> | <i>Proteobacteria</i>    | <i>Bacteria</i> |
| Otu0052                                                                                      | 2.91                      | 0                             | 1.22              | 4.62    | 1.28                | 27.32                | unclass. <i>Betaproteobacteria</i>  | unclass. <i>Betaproteobacteria</i>  | unclass. <i>Betaproteobacteria</i>  | <i>Betaproteobacteria</i>  | <i>Proteobacteria</i>    | <i>Bacteria</i> |
| Otu0521                                                                                      | 1.08                      | 3.2                           | 1.07              | 2.51    | 1.12                | 28.44                | unclass. <i>Rhodobacteraceae</i>    | <i>Rhodobacteraceae</i>             | <i>Rhodobacterales</i>              | <i>Alphaproteobacteria</i> | <i>Proteobacteria</i>    | <i>Bacteria</i> |
| Otu0115                                                                                      | 0                         | 2.35                          | 0.98              | 4.13    | 1.03                | 29.47                | <i>Glaciecola</i>                   | <i>Alteromonadaceae</i>             | <i>Alteromonadales</i>              | <i>Gammaproteobacteria</i> | <i>Proteobacteria</i>    | <i>Bacteria</i> |
| Otu0487                                                                                      | 0                         | 2.26                          | 0.94              | 6.82    | 0.98                | 30.45                | unclass. <i>Chitinophagaceae</i>    | <i>Chitinophagaceae</i>             | <i>Sphingobacteriales</i>           | <i>Sphingobacteria</i>     | <i>Bacteroidetes</i>     | <i>Bacteria</i> |
| Otu0692                                                                                      | 2.21                      | 0                             | 0.91              | 2.58    | 0.96                | 31.41                | unclass. <i>Bacteria</i>            | unclass. <i>Bacteria</i>            | unclass. <i>Bacteria</i>            | unclass. <i>Bacteria</i>   | unclass. <i>Bacteria</i> | <i>Bacteria</i> |
| Otu0007                                                                                      | 2.06                      | 0                             | 0.86              | 4.32    | 0.9                 | 32.31                | unclass. <i>Flavobacteriales</i>    | unclass. <i>Flavobacteriales</i>    | <i>Flavobacteriales</i>             | <i>Flavobacteria</i>       | <i>Bacteroidetes</i>     | <i>Bacteria</i> |
| Otu0027                                                                                      | 0.2                       | 2.28                          | 0.85              | 1.83    | 0.89                | 33.2                 | <i>Pseudoalteromonas</i>            | <i>Pseudoalteromonadaceae</i>       | <i>Alteromonadales</i>              | <i>Gammaproteobacteria</i> | <i>Proteobacteria</i>    | <i>Bacteria</i> |
| Otu0110                                                                                      | 0                         | 2.08                          | 0.85              | 1.83    | 0.89                | 34.09                | unclass. <i>Rhodobacteraceae</i>    | <i>Rhodobacteraceae</i>             | <i>Rhodobacterales</i>              | <i>Alphaproteobacteria</i> | <i>Proteobacteria</i>    | <i>Bacteria</i> |
| Otu0706                                                                                      | 1.99                      | 0                             | 0.83              | 4.15    | 0.87                | 34.96                | unclass. <i>Planctomycetaceae</i>   | <i>Planctomycetaceae</i>            | <i>Planctomycetales</i>             | <i>Planctomycetacia</i>    | <i>Planctomycetes</i>    | <i>Bacteria</i> |
| Otu0532                                                                                      | 0.77                      | 2.73                          | 0.83              | 1.46    | 0.87                | 35.82                | unclass. <i>Rhodobacteraceae</i>    | <i>Rhodobacteraceae</i>             | <i>Rhodobacterales</i>              | <i>Alphaproteobacteria</i> | <i>Proteobacteria</i>    | <i>Bacteria</i> |
| Otu0461                                                                                      | 1.89                      | 0                             | 0.8               | 1.71    | 0.84                | 36.66                | unclass. <i>Microbacteriaceae</i>   | <i>Microbacteriaceae</i>            | <i>Actinomycetales</i>              | <i>Actinobacteria</i>      | <i>Actinobacteria</i>    | <i>Bacteria</i> |
| Otu0588                                                                                      | 0                         | 1.8                           | 0.75              | 3.17    | 0.78                | 37.44                | <i>Amphritea</i>                    | <i>Oceanospirillaceae</i>           | <i>Oceanospirillales</i>            | <i>Gammaproteobacteria</i> | <i>Proteobacteria</i>    | <i>Bacteria</i> |
| Otu0576                                                                                      | 0                         | 1.81                          | 0.75              | 2.22    | 0.78                | 38.22                | unclass. <i>Alphaproteobacteria</i> | unclass. <i>Alphaproteobacteria</i> | unclass. <i>Alphaproteobacteria</i> | <i>Alphaproteobacteria</i> | <i>Proteobacteria</i>    | <i>Bacteria</i> |
| Otu0519                                                                                      | 1.72                      | 0                             | 0.72              | 1.96    | 0.75                | 38.98                | unclass. <i>Rhodospirillaceae</i>   | <i>Rhodospirillaceae</i>            | <i>Rhodospirillales</i>             | <i>Alphaproteobacteria</i> | <i>Proteobacteria</i>    | <i>Bacteria</i> |
| Otu0553                                                                                      | 0                         | 1.75                          | 0.72              | 3.25    | 0.75                | 39.73                | <i>Vibrio</i>                       | <i>Vibrionaceae</i>                 | <i>Vibrionales</i>                  | <i>Gammaproteobacteria</i> | <i>Proteobacteria</i>    | <i>Bacteria</i> |

| OTU     | Av.A <sub>i</sub><br>(no) | Av. <sub>i</sub><br>(initial) | Av.δ <sub>i</sub> | Av.δ <sub>i</sub> /SD | Av.δ <sub>i</sub> % | ΣAv.δ <sub>i</sub> % | Genus                               | Family                              | Order                               | Class                          | Phylum                   | Domain          |
|---------|---------------------------|-------------------------------|-------------------|-----------------------|---------------------|----------------------|-------------------------------------|-------------------------------------|-------------------------------------|--------------------------------|--------------------------|-----------------|
| Otu0525 | 0                         | 1.62                          | 0.68              | 4.09                  | 0.71                | 40.44                | <i>Reinekea</i>                     | <i>Oceanospirillaceae</i>           | <i>Oceanospirillales</i>            | <i>Gammaproteobacteria</i>     | <i>Proteobacteria</i>    | <i>Bacteria</i> |
| Otu0473 | 1.63                      | 0                             | 0.67              | 2.46                  | 0.7                 | 41.13                | unclass. <i>Alphaproteobacteria</i> | unclass. <i>Alphaproteobacteria</i> | unclass. <i>Alphaproteobacteria</i> | <i>Alphaproteobacteria</i>     | <i>Proteobacteria</i>    | <i>Bacteria</i> |
| Otu0512 | 1.58                      | 0                             | 0.67              | 1.43                  | 0.7                 | 41.83                | <i>Rhodopirellula</i>               | <i>Planctomycetaceae</i>            | <i>Planctomycetales</i>             | <i>Planctomycetacia</i>        | <i>Planctomycetes</i>    | <i>Bacteria</i> |
| Otu0551 | 0                         | 1.57                          | 0.66              | 1.63                  | 0.69                | 42.52                | <i>Arcobacter</i>                   | <i>Campylobacteraceae</i>           | <i>Campylobacterales</i>            | <i>Epsilonproteobacteria</i>   | <i>Proteobacteria</i>    | <i>Bacteria</i> |
| Otu0450 | 1.66                      | 0.2                           | 0.65              | 1.12                  | 0.68                | 43.2                 | <i>Sphingobium</i>                  | <i>Sphingomonadaceae</i>            | <i>Sphingomonadales</i>             | <i>Alphaproteobacteria</i>     | <i>Proteobacteria</i>    | <i>Bacteria</i> |
| Otu0495 | 1.53                      | 0                             | 0.63              | 1.7                   | 0.66                | 43.86                | unclass. <i>Flavobacteriales</i>    | unclass. <i>Flavobacteriales</i>    | <i>Flavobacteriales</i>             | <i>Flavobacteria</i>           | <i>Bacteroidetes</i>     | <i>Bacteria</i> |
| Otu0469 | 1.52                      | 0                             | 0.63              | 1.3                   | 0.66                | 44.52                | unclass. <i>Bacteria</i>            | unclass. <i>Bacteria</i>            | unclass. <i>Bacteria</i>            | unclass. <i>Bacteria</i>       | unclass. <i>Bacteria</i> | <i>Bacteria</i> |
| Otu0068 | 1.51                      | 0                             | 0.63              | 4.69                  | 0.66                | 45.18                | <i>Pelagibacter</i>                 | SAR11-clade                         | <i>Rickettsiales</i>                | <i>Alphaproteobacteria</i>     | <i>Proteobacteria</i>    | <i>Bacteria</i> |
| Otu0463 | 1.43                      | 0                             | 0.6               | 3.39                  | 0.63                | 45.81                | unclass. <i>Flavobacteriaceae</i>   | <i>Flavobacteriaceae</i>            | <i>Flavobacteriales</i>             | <i>Flavobacteria</i>           | <i>Bacteroidetes</i>     | <i>Bacteria</i> |
| Otu0157 | 1.37                      | 0                             | 0.58              | 1.61                  | 0.61                | 46.42                | unclass. <i>Gammaproteobacteria</i> | unclass. <i>Gammaproteobacteria</i> | unclass. <i>Gammaproteobacteria</i> | <i>Gammaproteobacteria</i>     | <i>Proteobacteria</i>    | <i>Bacteria</i> |
| Otu0046 | 1.29                      | 0                             | 0.55              | 1.74                  | 0.58                | 46.99                | unclass. <i>Flavobacteriaceae</i>   | <i>Flavobacteriaceae</i>            | <i>Flavobacteriales</i>             | <i>Flavobacteria</i>           | <i>Bacteroidetes</i>     | <i>Bacteria</i> |
| Otu0460 | 0.28                      | 1.32                          | 0.51              | 1.1                   | 0.54                | 47.53                | <i>Arcobacter</i>                   | <i>Campylobacteraceae</i>           | <i>Campylobacterales</i>            | <i>Epsilonproteobacteria</i>   | <i>Proteobacteria</i>    | <i>Bacteria</i> |
| Otu0107 | 0                         | 1.25                          | 0.51              | 1.11                  | 0.54                | 48.07                | unclass. <i>Rhodobacteraceae</i>    | <i>Rhodobacteraceae</i>             | <i>Rhodobacterales</i>              | <i>Alphaproteobacteria</i>     | <i>Proteobacteria</i>    | <i>Bacteria</i> |
| Otu0705 | 1.19                      | 0                             | 0.5               | 1.19                  | 0.52                | 48.59                | <i>Planctomyces</i>                 | <i>Planctomycetaceae</i>            | <i>Planctomycetales</i>             | <i>Planctomycetacia</i>        | <i>Planctomycetes</i>    | <i>Bacteria</i> |
| Otu0583 | 0                         | 1.17                          | 0.49              | 5.08                  | 0.51                | 49.1                 | unclass. <i>Flavobacteriaceae</i>   | <i>Flavobacteriaceae</i>            | <i>Flavobacteriales</i>             | <i>Flavobacteria</i>           | <i>Bacteroidetes</i>     | <i>Bacteria</i> |
| Otu0019 | 1.33                      | 0.2                           | 0.48              | 1.37                  | 0.5                 | 49.6                 | unclass. <i>Gammaproteobacteria</i> | unclass. <i>Gammaproteobacteria</i> | unclass. <i>Gammaproteobacteria</i> | <i>Gammaproteobacteria</i>     | <i>Proteobacteria</i>    | <i>Bacteria</i> |
| Otu0053 | 1.29                      | 0.2                           | 0.48              | 1.4                   | 0.5                 | 50.1                 | unclass. <i>Rhodobacteraceae</i>    | <i>Rhodobacteraceae</i>             | <i>Rhodobacterales</i>              | <i>Alphaproteobacteria</i>     | <i>Proteobacteria</i>    | <i>Bacteria</i> |
| Otu0695 | 1.12                      | 0                             | 0.48              | 0.81                  | 0.5                 | 50.6                 | unclass. <i>Proteobacteria</i>      | unclass. <i>Proteobacteria</i>      | unclass. <i>Proteobacteria</i>      | unclass. <i>Proteobacteria</i> | <i>Proteobacteria</i>    | <i>Bacteria</i> |
| Otu0503 | 1.15                      | 0                             | 0.47              | 1.67                  | 0.49                | 51.09                | unclass. <i>Bacteroidetes</i>       | unclass. <i>Bacteroidetes</i>       | unclass. <i>Bacteroidetes</i>       | unclass. <i>Bacteroidetes</i>  | <i>Bacteroidetes</i>     | <i>Bacteria</i> |
| Otu0615 | 0                         | 1.12                          | 0.46              | 0.84                  | 0.48                | 51.57                | <i>Neptuniibacter</i>               | <i>Oceanospirillaceae</i>           | <i>Oceanospirillales</i>            | <i>Gammaproteobacteria</i>     | <i>Proteobacteria</i>    | <i>Bacteria</i> |
| Otu0354 | 1.11                      | 0                             | 0.46              | 1.78                  | 0.48                | 52.06                | <i>Andersenella</i>                 | <i>Rhodobiaceae</i>                 | <i>Rhizobiales</i>                  | <i>Alphaproteobacteria</i>     | <i>Proteobacteria</i>    | <i>Bacteria</i> |
| Otu0435 | 1.12                      | 0                             | 0.46              | 0.6                   | 0.48                | 52.54                | unclass. <i>Flavobacteriales</i>    | unclass. <i>Flavobacteriales</i>    | <i>Flavobacteriales</i>             | <i>Flavobacteria</i>           | <i>Bacteroidetes</i>     | <i>Bacteria</i> |
| Otu0289 | 1.08                      | 0                             | 0.45              | 1                     | 0.47                | 53.01                | unclass. <i>Bacteroidetes</i>       | unclass. <i>Bacteroidetes</i>       | unclass. <i>Bacteroidetes</i>       | unclass. <i>Bacteroidetes</i>  | <i>Bacteroidetes</i>     | <i>Bacteria</i> |
| Otu0542 | 0                         | 1.09                          | 0.45              | 1.72                  | 0.47                | 53.48                | unclass. <i>Oceanospirillaceae</i>  | <i>Oceanospirillaceae</i>           | <i>Oceanospirillales</i>            | <i>Gammaproteobacteria</i>     | <i>Proteobacteria</i>    | <i>Bacteria</i> |
| Otu0703 | 1.03                      | 0                             | 0.43              | 1.7                   | 0.45                | 53.92                | unclass. <i>Gammaproteobacteria</i> | unclass. <i>Gammaproteobacteria</i> | unclass. <i>Gammaproteobacteria</i> | <i>Gammaproteobacteria</i>     | <i>Proteobacteria</i>    | <i>Bacteria</i> |
| Otu0502 | 1.03                      | 0                             | 0.43              | 1.78                  | 0.45                | 54.37                | unclass. <i>Gammaproteobacteria</i> | unclass. <i>Gammaproteobacteria</i> | unclass. <i>Gammaproteobacteria</i> | <i>Gammaproteobacteria</i>     | <i>Proteobacteria</i>    | <i>Bacteria</i> |
| Otu0489 | 0                         | 1                             | 0.42              | 12.95                 | 0.44                | 54.81                | unclass. <i>Vibrionaceae</i>        | <i>Vibrionaceae</i>                 | <i>Vibrionales</i>                  | <i>Gammaproteobacteria</i>     | <i>Proteobacteria</i>    | <i>Bacteria</i> |

| OTU     | Av.A <sub>i</sub><br>(no) | Av. <sub>i</sub><br>(initial) | Av.δ <sub>i</sub> | Av.δ <sub>i</sub> /SD | Av.δ <sub>i</sub> % | ΣAv.δ <sub>i</sub> % | Genus                                  | Family                              | Order                               | Class                          | Phylum                   | Domain          |
|---------|---------------------------|-------------------------------|-------------------|-----------------------|---------------------|----------------------|----------------------------------------|-------------------------------------|-------------------------------------|--------------------------------|--------------------------|-----------------|
| Otu0186 | 0.97                      | 0                             | 0.41              | 1.82                  | 0.43                | 55.24                | unclass. <i>Planctomycetaceae</i>      | <i>Planctomycetaceae</i>            | <i>Planctomycetales</i>             | <i>Planctomycetacia</i>        | <i>Planctomycetes</i>    | <i>Bacteria</i> |
| Otu0704 | 0.97                      | 0                             | 0.41              | 1.84                  | 0.43                | 55.67                | unclass. <i>Proteobacteria</i>         | unclass. <i>Proteobacteria</i>      | unclass. <i>Proteobacteria</i>      | unclass. <i>Proteobacteria</i> | <i>Proteobacteria</i>    | <i>Bacteria</i> |
| Otu0753 | 0.95                      | 0                             | 0.4               | 0.64                  | 0.42                | 56.09                | unclass. <i>Flavobacteriales</i>       | unclass. <i>Flavobacteriales</i>    | <i>Flavobacteriales</i>             | <i>Flavobacteria</i>           | <i>Bacteroidetes</i>     | <i>Bacteria</i> |
| Otu0245 | 0.97                      | 0                             | 0.4               | 1.79                  | 0.42                | 56.51                | unclass. <i>Flavobacteriales</i>       | unclass. <i>Flavobacteriales</i>    | <i>Flavobacteriales</i>             | <i>Flavobacteria</i>           | <i>Bacteroidetes</i>     | <i>Bacteria</i> |
| Otu0578 | 0                         | 0.97                          | 0.4               | 1.77                  | 0.42                | 56.92                | <i>Winogradskyella</i>                 | <i>Flavobacteriaceae</i>            | <i>Flavobacteriales</i>             | <i>Flavobacteria</i>           | <i>Bacteroidetes</i>     | <i>Bacteria</i> |
| Otu0533 | 0                         | 0.95                          | 0.39              | 1.58                  | 0.41                | 57.34                | <i>Nisaea</i>                          | <i>Rhodospirillaceae</i>            | <i>Rhodospirillales</i>             | <i>Alphaproteobacteria</i>     | <i>Proteobacteria</i>    | <i>Bacteria</i> |
| Otu0084 | 0.93                      | 0                             | 0.39              | 1.03                  | 0.41                | 57.74                | unclass. <i>Gammaproteobacteria</i>    | unclass. <i>Gammaproteobacteria</i> | unclass. <i>Gammaproteobacteria</i> | <i>Gammaproteobacteria</i>     | <i>Proteobacteria</i>    | <i>Bacteria</i> |
| Otu0036 | 0                         | 0.95                          | 0.39              | 1.68                  | 0.41                | 58.15                | <i>Glaciecola</i>                      | <i>Alteromonadaceae</i>             | <i>Alteromonadales</i>              | <i>Gammaproteobacteria</i>     | <i>Proteobacteria</i>    | <i>Bacteria</i> |
| Otu0779 | 0.95                      | 0                             | 0.39              | 0.69                  | 0.4                 | 58.55                | unclass. <i>Ectothiorhodospiraceae</i> | <i>Ectothiorhodospiraceae</i>       | <i>Chromatiales</i>                 | <i>Gammaproteobacteria</i>     | <i>Proteobacteria</i>    | <i>Bacteria</i> |
| Otu0580 | 0                         | 0.91                          | 0.37              | 1.19                  | 0.39                | 58.95                | <i>Neptuniibacter</i>                  | <i>Oceanospirillaceae</i>           | <i>Oceanospirillales</i>            | <i>Gammaproteobacteria</i>     | <i>Proteobacteria</i>    | <i>Bacteria</i> |
| Otu0701 | 0.88                      | 0                             | 0.37              | 1.06                  | 0.39                | 59.33                | unclass. <i>Bacteria</i>               | unclass. <i>Bacteria</i>            | unclass. <i>Bacteria</i>            | unclass. <i>Bacteria</i>       | unclass. <i>Bacteria</i> | <i>Bacteria</i> |
| Otu0611 | 0.72                      | 0.2                           | 0.37              | 0.62                  | 0.38                | 59.72                | unclass. <i>Bacteroidetes</i>          | unclass. <i>Bacteroidetes</i>       | unclass. <i>Bacteroidetes</i>       | unclass. <i>Bacteroidetes</i>  | <i>Bacteroidetes</i>     | <i>Bacteria</i> |
| Otu0010 | 0.88                      | 0.68                          | 0.36              | 1.61                  | 0.38                | 60.09                | unclass. <i>Flavobacteriaceae</i>      | <i>Flavobacteriaceae</i>            | <i>Flavobacteriales</i>             | <i>Flavobacteria</i>           | <i>Bacteroidetes</i>     | <i>Bacteria</i> |
| Otu0234 | 0                         | 0.85                          | 0.36              | 0.79                  | 0.37                | 60.47                | <i>Arcobacter</i>                      | <i>Campylobacteraceae</i>           | <i>Campylobacterales</i>            | <i>Epsilonproteobacteria</i>   | <i>Proteobacteria</i>    | <i>Bacteria</i> |
| Otu0261 | 0.77                      | 1.24                          | 0.35              | 1.33                  | 0.37                | 60.84                | <i>Winogradskyella</i>                 | <i>Flavobacteriaceae</i>            | <i>Flavobacteriales</i>             | <i>Flavobacteria</i>           | <i>Bacteroidetes</i>     | <i>Bacteria</i> |
| Otu0599 | 0                         | 0.8                           | 0.34              | 1.93                  | 0.35                | 61.19                | <i>Winogradskyella</i>                 | <i>Flavobacteriaceae</i>            | <i>Flavobacteriales</i>             | <i>Flavobacteria</i>           | <i>Bacteroidetes</i>     | <i>Bacteria</i> |
| Otu0232 | 0                         | 0.8                           | 0.34              | 1                     | 0.35                | 61.54                | unclass. <i>Rhodobacteraceae</i>       | <i>Rhodobacteraceae</i>             | <i>Rhodobacterales</i>              | <i>Alphaproteobacteria</i>     | <i>Proteobacteria</i>    | <i>Bacteria</i> |
| Otu0165 | 0.2                       | 0.83                          | 0.33              | 1.16                  | 0.34                | 61.88                | <i>Marinomonas</i>                     | <i>Oceanospirillaceae</i>           | <i>Oceanospirillales</i>            | <i>Gammaproteobacteria</i>     | <i>Proteobacteria</i>    | <i>Bacteria</i> |
| Otu0694 | 0.75                      | 0                             | 0.31              | 1.06                  | 0.33                | 62.21                | unclass. <i>Alphaproteobacteria</i>    | unclass. <i>Alphaproteobacteria</i> | unclass. <i>Alphaproteobacteria</i> | <i>Alphaproteobacteria</i>     | <i>Proteobacteria</i>    | <i>Bacteria</i> |
| Otu0408 | 0.75                      | 0                             | 0.3               | 1.13                  | 0.32                | 62.53                | unclass. <i>Flavobacteriaceae</i>      | <i>Flavobacteriaceae</i>            | <i>Flavobacteriales</i>             | <i>Flavobacteria</i>           | <i>Bacteroidetes</i>     | <i>Bacteria</i> |
| Otu0535 | 0                         | 0.75                          | 0.3               | 0.49                  | 0.32                | 62.84                | <i>Loktanelia</i>                      | <i>Rhodobacteraceae</i>             | <i>Rhodobacterales</i>              | <i>Alphaproteobacteria</i>     | <i>Proteobacteria</i>    | <i>Bacteria</i> |
| Otu0714 | 0.68                      | 0                             | 0.29              | 1.15                  | 0.31                | 63.15                | unclass. <i>Alphaproteobacteria</i>    | unclass. <i>Alphaproteobacteria</i> | unclass. <i>Alphaproteobacteria</i> | <i>Alphaproteobacteria</i>     | <i>Proteobacteria</i>    | <i>Bacteria</i> |
| Otu0504 | 0.68                      | 0                             | 0.29              | 1.15                  | 0.31                | 63.46                | unclass. <i>Alphaproteobacteria</i>    | unclass. <i>Alphaproteobacteria</i> | unclass. <i>Alphaproteobacteria</i> | <i>Alphaproteobacteria</i>     | <i>Proteobacteria</i>    | <i>Bacteria</i> |
| Otu0142 | 0.68                      | 0                             | 0.29              | 1.16                  | 0.31                | 63.77                | unclass. <i>Gammaproteobacteria</i>    | unclass. <i>Gammaproteobacteria</i> | unclass. <i>Gammaproteobacteria</i> | <i>Gammaproteobacteria</i>     | <i>Proteobacteria</i>    | <i>Bacteria</i> |
| Otu0696 | 0.68                      | 0                             | 0.29              | 1.14                  | 0.3                 | 64.07                | unclass. <i>Flavobacteriaceae</i>      | <i>Flavobacteriaceae</i>            | <i>Flavobacteriales</i>             | <i>Flavobacteria</i>           | <i>Bacteroidetes</i>     | <i>Bacteria</i> |
| Otu0577 | 0                         | 0.73                          | 0.29              | 0.77                  | 0.3                 | 64.37                | unclass. <i>Bacteroidetes</i>          | unclass. <i>Bacteroidetes</i>       | unclass. <i>Bacteroidetes</i>       | unclass. <i>Bacteroidetes</i>  | <i>Bacteroidetes</i>     | <i>Bacteria</i> |
| Otu0346 | 0                         | 0.68                          | 0.28              | 1.16                  | 0.29                | 64.67                | unclass. <i>Bacteria</i>               | unclass. <i>Bacteria</i>            | unclass. <i>Bacteria</i>            | unclass. <i>Bacteria</i>       | unclass. <i>Bacteria</i> | <i>Bacteria</i> |

| OTU     | Av. A <sub>i</sub><br>(no) | Av. A <sub>i</sub><br>(initial) | Av. δ <sub>i</sub> | Av. δ <sub>i</sub> /SD | Av. δ <sub>i</sub> % | ΣAv. δ <sub>i</sub> % | Genus                               | Family                              | Order                               | Class                          | Phylum                | Domain          |
|---------|----------------------------|---------------------------------|--------------------|------------------------|----------------------|-----------------------|-------------------------------------|-------------------------------------|-------------------------------------|--------------------------------|-----------------------|-----------------|
| Otu0700 | 0.68                       | 0                               | 0.28               | 1.18                   | 0.29                 | 64.96                 | unclass. <i>Alphaproteobacteria</i> | unclass. <i>Alphaproteobacteria</i> | unclass. <i>Alphaproteobacteria</i> | <i>Alphaproteobacteria</i>     | <i>Proteobacteria</i> | <i>Bacteria</i> |
| Otu0782 | 0.68                       | 0                               | 0.28               | 1.14                   | 0.29                 | 65.25                 | unclass. <i>Gammaproteobacteria</i> | unclass. <i>Gammaproteobacteria</i> | unclass. <i>Gammaproteobacteria</i> | <i>Gammaproteobacteria</i>     | <i>Proteobacteria</i> | <i>Bacteria</i> |
| Otu0048 | 0.63                       | 0                               | 0.27               | 0.79                   | 0.28                 | 65.53                 | unclass. <i>Flavobacteriaceae</i>   | <i>Flavobacteriaceae</i>            | <i>Flavobacteriales</i>             | <i>Flavobacteria</i>           | <i>Bacteroidetes</i>  | <i>Bacteria</i> |
| Otu0459 | 0.2                        | 0.68                            | 0.27               | 1.13                   | 0.28                 | 65.81                 | <i>Croceibacter</i>                 | <i>Flavobacteriaceae</i>            | <i>Flavobacteriales</i>             | <i>Flavobacteria</i>           | <i>Bacteroidetes</i>  | <i>Bacteria</i> |
| Otu0781 | 0.63                       | 0                               | 0.27               | 0.49                   | 0.28                 | 66.09                 | unclass. <i>Thiotrichales</i>       | unclass. <i>Thiotrichales</i>       | <i>Thiotrichales</i>                | <i>Gammaproteobacteria</i>     | <i>Proteobacteria</i> | <i>Bacteria</i> |
| Otu0697 | 0.6                        | 0                               | 0.26               | 1.19                   | 0.27                 | 66.36                 | unclass. <i>Flavobacteriaceae</i>   | <i>Flavobacteriaceae</i>            | <i>Flavobacteriales</i>             | <i>Flavobacteria</i>           | <i>Bacteroidetes</i>  | <i>Bacteria</i> |
| Otu0575 | 0                          | 0.65                            | 0.26               | 0.71                   | 0.27                 | 66.63                 | unclass. <i>Bacteroidetes</i>       | unclass. <i>Bacteroidetes</i>       | unclass. <i>Bacteroidetes</i>       | unclass. <i>Bacteroidetes</i>  | <i>Bacteroidetes</i>  | <i>Bacteria</i> |
| Otu0020 | 0.63                       | 0                               | 0.26               | 0.8                    | 0.27                 | 66.89                 | unclass. <i>Flammeovirgaceae</i>    | <i>Flammeovirgaceae</i>             | <i>Sphingobacteriales</i>           | <i>Sphingobacteria</i>         | <i>Bacteroidetes</i>  | <i>Bacteria</i> |
| Otu0505 | 0.63                       | 0                               | 0.25               | 0.8                    | 0.26                 | 67.16                 | unclass. <i>Chitinophagaceae</i>    | <i>Chitinophagaceae</i>             | <i>Sphingobacteriales</i>           | <i>Sphingobacteria</i>         | <i>Bacteroidetes</i>  | <i>Bacteria</i> |
| Otu0737 | 0.63                       | 0                               | 0.25               | 0.8                    | 0.26                 | 67.42                 | unclass. <i>Gammaproteobacteria</i> | unclass. <i>Gammaproteobacteria</i> | unclass. <i>Gammaproteobacteria</i> | <i>Gammaproteobacteria</i>     | <i>Proteobacteria</i> | <i>Bacteria</i> |
| Otu0476 | 0.6                        | 0                               | 0.25               | 1.19                   | 0.26                 | 67.68                 | unclass. <i>Actinomycetales</i>     | unclass. <i>Actinomycetales</i>     | <i>Actinomycetales</i>              | <i>Actinobacteria</i>          | <i>Actinobacteria</i> | <i>Bacteria</i> |
| Otu0272 | 0.6                        | 0                               | 0.25               | 1.19                   | 0.26                 | 67.94                 | unclass. <i>Flavobacteriaceae</i>   | <i>Flavobacteriaceae</i>            | <i>Flavobacteriales</i>             | <i>Flavobacteria</i>           | <i>Bacteroidetes</i>  | <i>Bacteria</i> |
| Otu0368 | 0.6                        | 0                               | 0.25               | 1.19                   | 0.26                 | 68.19                 | unclass. <i>Saprospiraceae</i>      | <i>Saprospiraceae</i>               | <i>Sphingobacteriales</i>           | <i>Sphingobacteria</i>         | <i>Bacteroidetes</i>  | <i>Bacteria</i> |
| Otu0191 | 0.6                        | 0                               | 0.25               | 1.19                   | 0.26                 | 68.45                 | unclass. <i>Proteobacteria</i>      | unclass. <i>Proteobacteria</i>      | unclass. <i>Proteobacteria</i>      | unclass. <i>Proteobacteria</i> | <i>Proteobacteria</i> | <i>Bacteria</i> |
| Otu0485 | 0.6                        | 0                               | 0.25               | 1.19                   | 0.26                 | 68.71                 | unclass. <i>Alphaproteobacteria</i> | unclass. <i>Alphaproteobacteria</i> | unclass. <i>Alphaproteobacteria</i> | <i>Alphaproteobacteria</i>     | <i>Proteobacteria</i> | <i>Bacteria</i> |
| Otu0103 | 0                          | 0.6                             | 0.25               | 0.75                   | 0.26                 | 68.97                 | <i>Pseudomonas</i>                  | <i>Pseudomonadaceae</i>             | <i>Pseudomonadales</i>              | <i>Gammaproteobacteria</i>     | <i>Proteobacteria</i> | <i>Bacteria</i> |
| Otu0113 | 0                          | 0.55                            | 0.24               | 0.75                   | 0.26                 | 69.22                 | <i>Colwellia</i>                    | <i>Colwelliaceae</i>                | <i>Alteromonadales</i>              | <i>Gammaproteobacteria</i>     | <i>Proteobacteria</i> | <i>Bacteria</i> |
| Otu0721 | 0.6                        | 0                               | 0.24               | 1.19                   | 0.25                 | 69.48                 | unclass. <i>Alphaproteobacteria</i> | unclass. <i>Alphaproteobacteria</i> | unclass. <i>Alphaproteobacteria</i> | <i>Alphaproteobacteria</i>     | <i>Proteobacteria</i> | <i>Bacteria</i> |
| Otu0768 | 0.6                        | 0                               | 0.24               | 1.19                   | 0.25                 | 69.73                 | unclass. <i>Flavobacteriales</i>    | unclass. <i>Flavobacteriales</i>    | <i>Flavobacteriales</i>             | <i>Flavobacteria</i>           | <i>Bacteroidetes</i>  | <i>Bacteria</i> |
| Otu0468 | 0.57                       | 0                               | 0.24               | 0.8                    | 0.25                 | 69.99                 | unclass. <i>Flavobacteriaceae</i>   | <i>Flavobacteriaceae</i>            | <i>Flavobacteriales</i>             | <i>Flavobacteria</i>           | <i>Bacteroidetes</i>  | <i>Bacteria</i> |
| Otu0607 | 0                          | 0.55                            | 0.24               | 0.74                   | 0.25                 | 70.23                 | unclass. <i>Flavobacteriaceae</i>   | <i>Flavobacteriaceae</i>            | <i>Flavobacteriales</i>             | <i>Flavobacteria</i>           | <i>Bacteroidetes</i>  | <i>Bacteria</i> |
| Otu0244 | 0                          | 0.55                            | 0.24               | 0.74                   | 0.25                 | 70.48                 | unclass. <i>Rhodobacteraceae</i>    | <i>Rhodobacteraceae</i>             | <i>Rhodobacteriales</i>             | <i>Alphaproteobacteria</i>     | <i>Proteobacteria</i> | <i>Bacteria</i> |
| Otu0597 | 0                          | 0.55                            | 0.24               | 0.74                   | 0.25                 | 70.73                 | <i>Arenibacter</i>                  | <i>Flavobacteriaceae</i>            | <i>Flavobacteriales</i>             | <i>Flavobacteria</i>           | <i>Bacteroidetes</i>  | <i>Bacteria</i> |
| Otu0595 | 0.4                        | 0.48                            | 0.23               | 1.01                   | 0.24                 | 70.97                 | unclass. <i>Legionellaceae</i>      | <i>Legionellaceae</i>               | <i>Legionellales</i>                | <i>Gammaproteobacteria</i>     | <i>Proteobacteria</i> | <i>Bacteria</i> |
| Otu0584 | 0                          | 0.55                            | 0.22               | 0.75                   | 0.23                 | 71.2                  | unclass. <i>Proteobacteria</i>      | unclass. <i>Proteobacteria</i>      | unclass. <i>Proteobacteria</i>      | unclass. <i>Proteobacteria</i> | <i>Proteobacteria</i> | <i>Bacteria</i> |
| Otu0125 | 0                          | 0.48                            | 0.22               | 0.78                   | 0.23                 | 71.43                 | <i>Leeuwenhoekella</i>              | <i>Flavobacteriaceae</i>            | <i>Flavobacteriales</i>             | <i>Flavobacteria</i>           | <i>Bacteroidetes</i>  | <i>Bacteria</i> |
| Otu0608 | 0                          | 0.48                            | 0.21               | 0.77                   | 0.22                 | 71.64                 | unclass. <i>Flavobacteriaceae</i>   | <i>Flavobacteriaceae</i>            | <i>Flavobacteriales</i>             | <i>Flavobacteria</i>           | <i>Bacteroidetes</i>  | <i>Bacteria</i> |

| OTU     | Av. A <sub>i</sub><br>(no) | Av. A <sub>i</sub><br>(initial) | Av. δ <sub>i</sub> | Av. δ <sub>i</sub> /SD | Av. δ <sub>i</sub> % | ΣAv. δ <sub>i</sub> % | Genus                               | Family                              | Order                               | Class                          | Phylum                   | Domain   |
|---------|----------------------------|---------------------------------|--------------------|------------------------|----------------------|-----------------------|-------------------------------------|-------------------------------------|-------------------------------------|--------------------------------|--------------------------|----------|
| Otu0080 | 0.48                       | 0                               | 0.21               | 0.77                   | 0.22                 | 71.86                 | <i>Polaribacter</i>                 | Flavobacteriaceae                   | Flavobacteriales                    | Flavobacteria                  | Bacteroidetes            | Bacteria |
| Otu0497 | 0.48                       | 0                               | 0.21               | 0.77                   | 0.22                 | 72.08                 | <i>Opitutus</i>                     | Opitutaceae                         | Opitutales                          | Opitutae                       | Verrucomicrobia          | Bacteria |
| Otu0754 | 0.48                       | 0                               | 0.21               | 0.77                   | 0.22                 | 72.29                 | unclass. <i>Flavobacteriales</i>    | unclass. <i>Flavobacteriales</i>    | Flavobacteriales                    | Flavobacteria                  | Bacteroidetes            | Bacteria |
| Otu0324 | 0                          | 0.48                            | 0.2                | 0.79                   | 0.21                 | 72.51                 | <i>Nisaea</i>                       | Rhodospirillaceae                   | Rhodospirillales                    | Alphaproteobacteria            | Proteobacteria           | Bacteria |
| Otu0547 | 0                          | 0.48                            | 0.2                | 0.76                   | 0.21                 | 72.72                 | <i>Phenylobacterium</i>             | Caulobacteraceae                    | Caulobacterales                     | Alphaproteobacteria            | Proteobacteria           | Bacteria |
| Otu0710 | 0.48                       | 0                               | 0.2                | 0.78                   | 0.21                 | 72.93                 | unclass. <i>Gammaproteobacteria</i> | unclass. <i>Gammaproteobacteria</i> | unclass. <i>Gammaproteobacteria</i> | Gammaproteobacteria            | Proteobacteria           | Bacteria |
| Otu0596 | 0                          | 0.48                            | 0.2                | 0.78                   | 0.2                  | 73.14                 | <i>Neptunomonas</i>                 | Oceanospirillaceae                  | Oceanospirillales                   | Gammaproteobacteria            | Proteobacteria           | Bacteria |
| Otu0218 | 0.48                       | 0                               | 0.19               | 0.79                   | 0.2                  | 73.34                 | unclass. <i>Flavobacteriaceae</i>   | Flavobacteriaceae                   | Flavobacteriales                    | Flavobacteria                  | Bacteroidetes            | Bacteria |
| Otu0758 | 0.48                       | 0                               | 0.19               | 0.79                   | 0.2                  | 73.54                 | unclass. <i>Bacteria</i>            | unclass. <i>Bacteria</i>            | unclass. <i>Bacteria</i>            | unclass. <i>Bacteria</i>       | unclass. <i>Bacteria</i> | Bacteria |
| Otu0221 | 0.48                       | 0                               | 0.19               | 0.77                   | 0.2                  | 73.75                 | unclass. <i>Flavobacteriaceae</i>   | Flavobacteriaceae                   | Flavobacteriales                    | Flavobacteria                  | Bacteroidetes            | Bacteria |
| Otu0798 | 0.48                       | 0                               | 0.19               | 0.77                   | 0.2                  | 73.95                 | unclass. <i>Gammaproteobacteria</i> | unclass. <i>Gammaproteobacteria</i> | unclass. <i>Gammaproteobacteria</i> | Gammaproteobacteria            | Proteobacteria           | Bacteria |
| Otu0732 | 0.48                       | 0                               | 0.19               | 0.77                   | 0.2                  | 74.15                 | unclass. <i>Proteobacteria</i>      | unclass. <i>Proteobacteria</i>      | unclass. <i>Proteobacteria</i>      | unclass. <i>Proteobacteria</i> | Proteobacteria           | Bacteria |
| Otu0423 | 0                          | 0.48                            | 0.19               | 0.78                   | 0.2                  | 74.35                 | unclass. <i>Flavobacteriaceae</i>   | Flavobacteriaceae                   | Flavobacteriales                    | Flavobacteria                  | Bacteroidetes            | Bacteria |
| Otu0543 | 0                          | 0.48                            | 0.19               | 0.78                   | 0.2                  | 74.55                 | <i>Muricauda</i>                    | Flavobacteriaceae                   | Flavobacteriales                    | Flavobacteria                  | Bacteroidetes            | Bacteria |
| Otu0632 | 0                          | 0.49                            | 0.19               | 0.49                   | 0.2                  | 74.75                 | unclass. <i>Flavobacteriaceae</i>   | Flavobacteriaceae                   | Flavobacteriales                    | Flavobacteria                  | Bacteroidetes            | Bacteria |
| Otu0277 | 0.4                        | 0.2                             | 0.19               | 0.87                   | 0.2                  | 74.95                 | unclass. <i>Flavobacteriaceae</i>   | Flavobacteriaceae                   | Flavobacteriales                    | Flavobacteria                  | Bacteroidetes            | Bacteria |
| Otu0840 | 0.49                       | 0                               | 0.19               | 0.49                   | 0.2                  | 75.15                 | unclass. <i>Flavobacteriaceae</i>   | Flavobacteriaceae                   | Flavobacteriales                    | Flavobacteria                  | Bacteroidetes            | Bacteria |
| Otu0555 | 0.2                        | 0.4                             | 0.18               | 0.87                   | 0.19                 | 75.33                 | <i>Maricaulis</i>                   | Hyphomonadaceae                     | Caulobacterales                     | Alphaproteobacteria            | Proteobacteria           | Bacteria |
| Otu0038 | 0.4                        | 0                               | 0.17               | 0.8                    | 0.18                 | 75.52                 | unclass. <i>Proteobacteria</i>      | unclass. <i>Proteobacteria</i>      | unclass. <i>Proteobacteria</i>      | unclass. <i>Proteobacteria</i> | Proteobacteria           | Bacteria |
| Otu0216 | 0.4                        | 0                               | 0.17               | 0.8                    | 0.18                 | 75.7                  | <i>Pelagibacter</i>                 | SAR11-clade                         | Rickettsiales                       | Alphaproteobacteria            | Proteobacteria           | Bacteria |
| Otu0735 | 0.4                        | 0                               | 0.17               | 0.8                    | 0.18                 | 75.88                 | unclass. <i>Gammaproteobacteria</i> | unclass. <i>Gammaproteobacteria</i> | unclass. <i>Gammaproteobacteria</i> | Gammaproteobacteria            | Proteobacteria           | Bacteria |
| Otu0745 | 0.4                        | 0                               | 0.17               | 0.8                    | 0.18                 | 76.06                 | <i>Planctomyces</i>                 | Planctomycetaceae                   | Planctomycetales                    | Planctomycetacia               | Planctomycetes           | Bacteria |
| Otu0002 | 0.4                        | 0                               | 0.17               | 0.8                    | 0.18                 | 76.24                 | unclass. <i>Flavobacteriaceae</i>   | Flavobacteriaceae                   | Flavobacteriales                    | Flavobacteria                  | Bacteroidetes            | Bacteria |
| Otu0724 | 0.4                        | 0                               | 0.17               | 0.8                    | 0.18                 | 76.42                 | unclass. <i>Bacteria</i>            | unclass. <i>Bacteria</i>            | unclass. <i>Bacteria</i>            | unclass. <i>Bacteria</i>       | unclass. <i>Bacteria</i> | Bacteria |
| Otu0746 | 0.4                        | 0                               | 0.17               | 0.8                    | 0.18                 | 76.59                 | unclass. <i>Flavobacteriaceae</i>   | Flavobacteriaceae                   | Flavobacteriales                    | Flavobacteria                  | Bacteroidetes            | Bacteria |
| Otu0202 | 0.4                        | 0                               | 0.17               | 0.8                    | 0.18                 | 76.77                 | unclass. <i>Alteromonadaceae</i>    | Alteromonadaceae                    | Alteromonadales                     | Gammaproteobacteria            | Proteobacteria           | Bacteria |
| Otu0051 | 0.4                        | 0                               | 0.17               | 0.8                    | 0.18                 | 76.95                 | unclass. <i>Flavobacteriaceae</i>   | Flavobacteriaceae                   | Flavobacteriales                    | Flavobacteria                  | Bacteroidetes            | Bacteria |



| OTU     | Av. A <sub>i</sub><br>(no) | Av. A <sub>i</sub><br>(initial) | Av. δ <sub>i</sub> | Av. δ <sub>i</sub> /SD | Av. δ <sub>i</sub> % | ΣAv. δ <sub>i</sub> % | Genus                               | Family                              | Order                               | Class                           | Phylum                   | Domain          |
|---------|----------------------------|---------------------------------|--------------------|------------------------|----------------------|-----------------------|-------------------------------------|-------------------------------------|-------------------------------------|---------------------------------|--------------------------|-----------------|
| Otu0352 | 0.4                        | 0                               | 0.17               | 0.8                    | 0.18                 | 77.13                 | unclass. <i>Flavobacteriaceae</i>   | <i>Flavobacteriaceae</i>            | <i>Flavobacteriales</i>             | <i>Flavobacteria</i>            | <i>Bacteroidetes</i>     | <i>Bacteria</i> |
| Otu0568 | 0                          | 0.4                             | 0.17               | 0.8                    | 0.18                 | 77.31                 | unclass. <i>Flavobacteriales</i>    | unclass. <i>Flavobacteriales</i>    | <i>Flavobacteriales</i>             | <i>Flavobacteria</i>            | <i>Bacteroidetes</i>     | <i>Bacteria</i> |
| Otu0112 | 0                          | 0.4                             | 0.17               | 0.8                    | 0.18                 | 77.49                 | <i>Polaribacter</i>                 | <i>Flavobacteriaceae</i>            | <i>Flavobacteriales</i>             | <i>Flavobacteria</i>            | <i>Bacteroidetes</i>     | <i>Bacteria</i> |
| Otu0783 | 0.4                        | 0                               | 0.17               | 0.49                   | 0.18                 | 77.66                 | unclass. <i>Gammaproteobacteria</i> | unclass. <i>Gammaproteobacteria</i> | unclass. <i>Gammaproteobacteria</i> | <i>Gammaproteobacteria</i>      | <i>Proteobacteria</i>    | <i>Bacteria</i> |
| Otu0604 | 0                          | 0.4                             | 0.17               | 0.79                   | 0.18                 | 77.84                 | unclass. <i>Bacteroidetes</i>       | unclass. <i>Bacteroidetes</i>       | unclass. <i>Bacteroidetes</i>       | unclass. <i>Bacteroidetes</i>   | <i>Bacteroidetes</i>     | <i>Bacteria</i> |
| Otu0434 | 0                          | 0.4                             | 0.17               | 0.8                    | 0.17                 | 78.01                 | <i>Maribacter</i>                   | <i>Flavobacteriaceae</i>            | <i>Flavobacteriales</i>             | <i>Flavobacteria</i>            | <i>Bacteroidetes</i>     | <i>Bacteria</i> |
| Otu0598 | 0                          | 0.4                             | 0.17               | 0.8                    | 0.17                 | 78.19                 | <i>Arcobacter</i>                   | <i>Campylobacteraceae</i>           | <i>Campylobacterales</i>            | <i>Epsilonproteobacteria</i>    | <i>Proteobacteria</i>    | <i>Bacteria</i> |
| Otu0727 | 0.4                        | 0                               | 0.16               | 0.79                   | 0.17                 | 78.36                 | unclass. <i>Deltaproteobacteria</i> | unclass. <i>Deltaproteobacteria</i> | unclass. <i>Deltaproteobacteria</i> | <i>Deltaproteobacteria</i>      | <i>Proteobacteria</i>    | <i>Bacteria</i> |
| Otu0472 | 0.4                        | 0                               | 0.16               | 0.79                   | 0.17                 | 78.53                 | unclass. <i>Bacteroidetes</i>       | unclass. <i>Bacteroidetes</i>       | unclass. <i>Bacteroidetes</i>       | unclass. <i>Bacteroidetes</i>   | <i>Bacteroidetes</i>     | <i>Bacteria</i> |
| Otu0490 | 0.4                        | 0                               | 0.16               | 0.79                   | 0.17                 | 78.7                  | unclass. <i>Burkholderiales</i>     | unclass. <i>Burkholderiales</i>     | <i>Burkholderiales</i>              | <i>Betaproteobacteria</i>       | <i>Proteobacteria</i>    | <i>Bacteria</i> |
| Otu0766 | 0.4                        | 0                               | 0.16               | 0.79                   | 0.17                 | 78.87                 | <i>Lentisphaera</i>                 | <i>Lentisphaeraceae</i>             | <i>Lentisphaerales</i>              | <i>Lentisphaeria</i>            | <i>Lentisphaerae</i>     | <i>Bacteria</i> |
| Otu0774 | 0.4                        | 0                               | 0.16               | 0.79                   | 0.17                 | 79.04                 | unclass. <i>Bacteria</i>            | unclass. <i>Bacteria</i>            | unclass. <i>Bacteria</i>            | unclass. <i>Bacteria</i>        | unclass. <i>Bacteria</i> | <i>Bacteria</i> |
| Otu0564 | 0                          | 0.4                             | 0.16               | 0.49                   | 0.17                 | 79.21                 | unclass. <i>Bacteroidetes</i>       | unclass. <i>Bacteroidetes</i>       | unclass. <i>Bacteroidetes</i>       | unclass. <i>Bacteroidetes</i>   | <i>Bacteroidetes</i>     | <i>Bacteria</i> |
| Otu0616 | 0                          | 0.4                             | 0.16               | 0.49                   | 0.17                 | 79.38                 | unclass. <i>Bacteria</i>            | unclass. <i>Bacteria</i>            | unclass. <i>Bacteria</i>            | unclass. <i>Bacteria</i>        | unclass. <i>Bacteria</i> | <i>Bacteria</i> |
| Otu0536 | 0                          | 0.4                             | 0.16               | 0.8                    | 0.17                 | 79.55                 | <i>Maribacter</i>                   | <i>Flavobacteriaceae</i>            | <i>Flavobacteriales</i>             | <i>Flavobacteria</i>            | <i>Bacteroidetes</i>     | <i>Bacteria</i> |
| Otu0582 | 0                          | 0.4                             | 0.16               | 0.8                    | 0.17                 | 79.72                 | unclass. <i>Rhodobacteraceae</i>    | <i>Rhodobacteraceae</i>             | <i>Rhodobacterales</i>              | <i>Alphaproteobacteria</i>      | <i>Proteobacteria</i>    | <i>Bacteria</i> |
| Otu0593 | 0                          | 0.4                             | 0.16               | 0.8                    | 0.17                 | 79.89                 | <i>Psychroserpens</i>               | <i>Flavobacteriaceae</i>            | <i>Flavobacteriales</i>             | <i>Flavobacteria</i>            | <i>Bacteroidetes</i>     | <i>Bacteria</i> |
| Otu0569 | 0                          | 0.4                             | 0.16               | 0.49                   | 0.17                 | 80.06                 | unclass. <i>Proteobacteria</i>      | unclass. <i>Proteobacteria</i>      | unclass. <i>Proteobacteria</i>      | unclass. <i>Proteobacteria</i>  | <i>Proteobacteria</i>    | <i>Bacteria</i> |
| Otu0541 | 0.4                        | 0                               | 0.16               | 0.8                    | 0.17                 | 80.23                 | unclass. <i>Rhodobacteraceae</i>    | <i>Rhodobacteraceae</i>             | <i>Rhodobacterales</i>              | <i>Alphaproteobacteria</i>      | <i>Proteobacteria</i>    | <i>Bacteria</i> |
| Otu0736 | 0.4                        | 0                               | 0.16               | 0.8                    | 0.17                 | 80.39                 | <i>Persicirhabdus</i>               | <i>Verrucomicrobiaceae</i>          | <i>Verrucomicrobiales</i>           | <i>Verrucomicrobiae</i>         | <i>Verrucomicrobia</i>   | <i>Bacteria</i> |
| Otu0811 | 0.4                        | 0                               | 0.16               | 0.8                    | 0.17                 | 80.56                 | unclass. <i>Bacteria</i>            | unclass. <i>Bacteria</i>            | unclass. <i>Bacteria</i>            | unclass. <i>Bacteria</i>        | unclass. <i>Bacteria</i> | <i>Bacteria</i> |
| Otu0255 | 0.4                        | 0                               | 0.16               | 0.8                    | 0.17                 | 80.73                 | <i>Sphingopyxis</i>                 | <i>Sphingomonadaceae</i>            | <i>Sphingomonadales</i>             | <i>Alphaproteobacteria</i>      | <i>Proteobacteria</i>    | <i>Bacteria</i> |
| Otu0467 | 0.4                        | 0                               | 0.16               | 0.8                    | 0.17                 | 80.89                 | unclass. <i>Rhodospirillaceae</i>   | <i>Rhodospirillaceae</i>            | <i>Rhodospirillales</i>             | <i>Alphaproteobacteria</i>      | <i>Proteobacteria</i>    | <i>Bacteria</i> |
| Otu0470 | 0.4                        | 0                               | 0.16               | 0.8                    | 0.17                 | 81.06                 | unclass. <i>Flavobacteriaceae</i>   | <i>Flavobacteriaceae</i>            | <i>Flavobacteriales</i>             | <i>Flavobacteria</i>            | <i>Bacteroidetes</i>     | <i>Bacteria</i> |
| Otu0707 | 0.4                        | 0                               | 0.16               | 0.8                    | 0.17                 | 81.23                 | <i>Haliae</i>                       | <i>Alteromonadaceae</i>             | <i>Alteromonadales</i>              | <i>Gammaproteobacteria</i>      | <i>Proteobacteria</i>    | <i>Bacteria</i> |
| Otu0787 | 0.4                        | 0                               | 0.16               | 0.8                    | 0.17                 | 81.4                  | unclass. <i>Verrucomicrobia</i>     | unclass. <i>Verrucomicrobia</i>     | unclass. <i>Verrucomicrobia</i>     | unclass. <i>Verrucomicrobia</i> | <i>Verrucomicrobia</i>   | <i>Bacteria</i> |
| Otu0819 | 0.4                        | 0                               | 0.16               | 0.8                    | 0.17                 | 81.56                 | unclass. <i>Bacteria</i>            | unclass. <i>Bacteria</i>            | unclass. <i>Bacteria</i>            | unclass. <i>Bacteria</i>        | unclass. <i>Bacteria</i> | <i>Bacteria</i> |

| OTU     | Av.A <sub>i</sub><br>(no) | Av. <sub>i</sub><br>(initial) | Av.δ <sub>i</sub> | Av.δ <sub>i</sub> /SD | Av.δ <sub>i</sub> % | ΣAv.δ <sub>i</sub> % | Genus                               | Family                              | Order                               | Class                           | Phylum                   | Domain          |
|---------|---------------------------|-------------------------------|-------------------|-----------------------|---------------------|----------------------|-------------------------------------|-------------------------------------|-------------------------------------|---------------------------------|--------------------------|-----------------|
| Otu0263 | 0                         | 0.4                           | 0.16              | 0.8                   | 0.17                | 81.73                | <i>Krokinobacter</i>                | <i>Flavobacteriaceae</i>            | <i>Flavobacteriales</i>             | <i>Flavobacteria</i>            | <i>Bacteroidetes</i>     | <i>Bacteria</i> |
| Otu0320 | 0                         | 0.4                           | 0.16              | 0.8                   | 0.17                | 81.9                 | <i>Pseudoalteromonas</i>            | <i>Pseudoalteromonadaceae</i>       | <i>Alteromonadales</i>              | <i>Gammaproteobacteria</i>      | <i>Proteobacteria</i>    | <i>Bacteria</i> |
| Otu0628 | 0                         | 0.4                           | 0.16              | 0.8                   | 0.17                | 82.06                | <i>Lacinutrix</i>                   | <i>Flavobacteriaceae</i>            | <i>Flavobacteriales</i>             | <i>Flavobacteria</i>            | <i>Bacteroidetes</i>     | <i>Bacteria</i> |
| Otu0111 | 0                         | 0.4                           | 0.16              | 0.8                   | 0.17                | 82.23                | <i>Marinomonas</i>                  | <i>Oceanospirillaceae</i>           | <i>Oceanospirillales</i>            | <i>Gammaproteobacteria</i>      | <i>Proteobacteria</i>    | <i>Bacteria</i> |
| Otu0500 | 0                         | 0.4                           | 0.16              | 0.8                   | 0.17                | 82.39                | <i>Marinobacter</i>                 | <i>Alteromonadaceae</i>             | <i>Alteromonadales</i>              | <i>Gammaproteobacteria</i>      | <i>Proteobacteria</i>    | <i>Bacteria</i> |
| Otu0072 | 0.35                      | 0                             | 0.15              | 0.49                  | 0.16                | 82.55                | <i>Sulfitobacter</i>                | <i>Rhodobacteraceae</i>             | <i>Rhodobacterales</i>              | <i>Alphaproteobacteria</i>      | <i>Proteobacteria</i>    | <i>Bacteria</i> |
| Otu0757 | 0.35                      | 0                             | 0.15              | 0.49                  | 0.16                | 82.71                | unclass. <i>Gammaproteobacteria</i> | unclass. <i>Gammaproteobacteria</i> | unclass. <i>Gammaproteobacteria</i> | <i>Gammaproteobacteria</i>      | <i>Proteobacteria</i>    | <i>Bacteria</i> |
| Otu0789 | 0.35                      | 0                             | 0.15              | 0.49                  | 0.15                | 82.86                | unclass. <i>Proteobacteria</i>      | unclass. <i>Proteobacteria</i>      | unclass. <i>Proteobacteria</i>      | unclass. <i>Proteobacteria</i>  | <i>Proteobacteria</i>    | <i>Bacteria</i> |
| Otu0031 | 0.35                      | 0                             | 0.15              | 0.49                  | 0.15                | 83.01                | unclass. <i>Gammaproteobacteria</i> | unclass. <i>Gammaproteobacteria</i> | unclass. <i>Gammaproteobacteria</i> | <i>Gammaproteobacteria</i>      | <i>Proteobacteria</i>    | <i>Bacteria</i> |
| Otu0380 | 0.35                      | 0                             | 0.15              | 0.49                  | 0.15                | 83.17                | unclass. <i>Proteobacteria</i>      | unclass. <i>Proteobacteria</i>      | unclass. <i>Proteobacteria</i>      | unclass. <i>Proteobacteria</i>  | <i>Proteobacteria</i>    | <i>Bacteria</i> |
| Otu0814 | 0.35                      | 0                             | 0.15              | 0.49                  | 0.15                | 83.32                | unclass. <i>Proteobacteria</i>      | unclass. <i>Proteobacteria</i>      | unclass. <i>Proteobacteria</i>      | unclass. <i>Proteobacteria</i>  | <i>Proteobacteria</i>    | <i>Bacteria</i> |
| Otu0579 | 0                         | 0.35                          | 0.14              | 0.49                  | 0.15                | 83.46                | unclass. <i>Bacteroidetes</i>       | unclass. <i>Bacteroidetes</i>       | unclass. <i>Bacteroidetes</i>       | unclass. <i>Bacteroidetes</i>   | <i>Bacteroidetes</i>     | <i>Bacteria</i> |
| Otu0060 | 0.35                      | 0                             | 0.13              | 0.49                  | 0.14                | 83.6                 | unclass. <i>Actinomycetales</i>     | unclass. <i>Actinomycetales</i>     | <i>Actinomycetales</i>              | <i>Actinobacteria</i>           | <i>Actinobacteria</i>    | <i>Bacteria</i> |
| Otu0630 | 0.35                      | 0                             | 0.13              | 0.49                  | 0.14                | 83.74                | unclass. <i>Flavobacteriales</i>    | unclass. <i>Flavobacteriales</i>    | <i>Flavobacteriales</i>             | <i>Flavobacteria</i>            | <i>Bacteroidetes</i>     | <i>Bacteria</i> |
| Otu0617 | 0.2                       | 0.2                           | 0.13              | 0.67                  | 0.13                | 83.87                | <i>Algoriphagus</i>                 | <i>Cyclobacteriaceae</i>            | <i>Sphingobacteriales</i>           | <i>Sphingobacteria</i>          | <i>Bacteroidetes</i>     | <i>Bacteria</i> |
| Otu0600 | 0                         | 0.28                          | 0.13              | 0.49                  | 0.13                | 84                   | <i>Jannaschia</i>                   | <i>Rhodobacteraceae</i>             | <i>Rhodobacterales</i>              | <i>Alphaproteobacteria</i>      | <i>Proteobacteria</i>    | <i>Bacteria</i> |
| Otu0017 | 0.28                      | 0                             | 0.12              | 0.49                  | 0.13                | 84.13                | unclass. <i>Flavobacteriales</i>    | unclass. <i>Flavobacteriales</i>    | <i>Flavobacteriales</i>             | <i>Flavobacteria</i>            | <i>Bacteroidetes</i>     | <i>Bacteria</i> |
| Otu0030 | 0.28                      | 0                             | 0.12              | 0.49                  | 0.13                | 84.26                | unclass. <i>Gammaproteobacteria</i> | unclass. <i>Gammaproteobacteria</i> | unclass. <i>Gammaproteobacteria</i> | <i>Gammaproteobacteria</i>      | <i>Proteobacteria</i>    | <i>Bacteria</i> |
| Otu0759 | 0.28                      | 0                             | 0.12              | 0.49                  | 0.13                | 84.39                | unclass. <i>Verrucomicrobiaceae</i> | <i>Verrucomicrobiaceae</i>          | <i>Verrucomicrobiales</i>           | <i>Verrucomicrobiae</i>         | <i>Verrucomicrobia</i>   | <i>Bacteria</i> |
| Otu0075 | 0.28                      | 0                             | 0.12              | 0.49                  | 0.12                | 84.52                | unclass. <i>Alphaproteobacteria</i> | unclass. <i>Alphaproteobacteria</i> | unclass. <i>Alphaproteobacteria</i> | <i>Alphaproteobacteria</i>      | <i>Proteobacteria</i>    | <i>Bacteria</i> |
| Otu0282 | 0.28                      | 0                             | 0.12              | 0.49                  | 0.12                | 84.64                | <i>Haliae</i>                       | <i>Alteromonadaceae</i>             | <i>Alteromonadales</i>              | <i>Gammaproteobacteria</i>      | <i>Proteobacteria</i>    | <i>Bacteria</i> |
| Otu0743 | 0.28                      | 0                             | 0.12              | 0.49                  | 0.12                | 84.76                | unclass. <i>Verrucomicrobia</i>     | unclass. <i>Verrucomicrobia</i>     | unclass. <i>Verrucomicrobia</i>     | unclass. <i>Verrucomicrobia</i> | <i>Verrucomicrobia</i>   | <i>Bacteria</i> |
| Otu0761 | 0.28                      | 0                             | 0.12              | 0.49                  | 0.12                | 84.89                | unclass. <i>Verrucomicrobiaceae</i> | <i>Verrucomicrobiaceae</i>          | <i>Verrucomicrobiales</i>           | <i>Verrucomicrobiae</i>         | <i>Verrucomicrobia</i>   | <i>Bacteria</i> |
| Otu0810 | 0.28                      | 0                             | 0.12              | 0.49                  | 0.12                | 85.01                | unclass. <i>Gammaproteobacteria</i> | unclass. <i>Gammaproteobacteria</i> | unclass. <i>Gammaproteobacteria</i> | <i>Gammaproteobacteria</i>      | <i>Proteobacteria</i>    | <i>Bacteria</i> |
| Otu0822 | 0.28                      | 0                             | 0.12              | 0.49                  | 0.12                | 85.14                | unclass. <i>Proteobacteria</i>      | unclass. <i>Proteobacteria</i>      | unclass. <i>Proteobacteria</i>      | unclass. <i>Proteobacteria</i>  | <i>Proteobacteria</i>    | <i>Bacteria</i> |
| Otu0827 | 0.28                      | 0                             | 0.12              | 0.49                  | 0.12                | 85.26                | unclass. <i>Bacteria</i>            | unclass. <i>Bacteria</i>            | unclass. <i>Bacteria</i>            | unclass. <i>Bacteria</i>        | unclass. <i>Bacteria</i> | <i>Bacteria</i> |
| Otu0618 | 0                         | 0.28                          | 0.12              | 0.49                  | 0.12                | 85.38                | <i>Glaciecola</i>                   | <i>Alteromonadaceae</i>             | <i>Alteromonadales</i>              | <i>Gammaproteobacteria</i>      | <i>Proteobacteria</i>    | <i>Bacteria</i> |

| OTU     | Av. A <sub>i</sub><br>(no) | Av. A <sub>i</sub><br>(initial) | Av. δ <sub>i</sub> | Av. δ <sub>i</sub> /SD | Av. δ <sub>i</sub> % | ΣAv. δ <sub>i</sub> % | Genus                               | Family                              | Order                               | Class                         | Phylum                   | Domain          |
|---------|----------------------------|---------------------------------|--------------------|------------------------|----------------------|-----------------------|-------------------------------------|-------------------------------------|-------------------------------------|-------------------------------|--------------------------|-----------------|
| Otu0574 | 0                          | 0.28                            | 0.11               | 0.49                   | 0.12                 | 85.5                  | unclass. <i>Alphaproteobacteria</i> | unclass. <i>Alphaproteobacteria</i> | unclass. <i>Alphaproteobacteria</i> | <i>Alphaproteobacteria</i>    | <i>Proteobacteria</i>    | <i>Bacteria</i> |
| Otu0585 | 0                          | 0.28                            | 0.11               | 0.49                   | 0.12                 | 85.62                 | <i>Neptuniibacter</i>               | <i>Oceanospirillaceae</i>           | <i>Oceanospirillales</i>            | <i>Gammaproteobacteria</i>    | <i>Proteobacteria</i>    | <i>Bacteria</i> |
| Otu0635 | 0                          | 0.28                            | 0.11               | 0.49                   | 0.12                 | 85.73                 | unclass. <i>Rhodobacteraceae</i>    | <i>Rhodobacteraceae</i>             | <i>Rhodobacterales</i>              | <i>Alphaproteobacteria</i>    | <i>Proteobacteria</i>    | <i>Bacteria</i> |
| Otu0641 | 0                          | 0.28                            | 0.11               | 0.49                   | 0.12                 | 85.85                 | <i>Flavobacterium</i>               | <i>Flavobacteriaceae</i>            | <i>Flavobacteriales</i>             | <i>Flavobacteria</i>          | <i>Bacteroidetes</i>     | <i>Bacteria</i> |
| Otu0644 | 0                          | 0.28                            | 0.11               | 0.49                   | 0.12                 | 85.96                 | <i>Polaribacter</i>                 | <i>Flavobacteriaceae</i>            | <i>Flavobacteriales</i>             | <i>Flavobacteria</i>          | <i>Bacteroidetes</i>     | <i>Bacteria</i> |
| Otu0550 | 0.28                       | 0                               | 0.11               | 0.49                   | 0.11                 | 86.08                 | unclass. <i>Flavobacteriales</i>    | unclass. <i>Flavobacteriales</i>    | <i>Flavobacteriales</i>             | <i>Flavobacteria</i>          | <i>Bacteroidetes</i>     | <i>Bacteria</i> |
| Otu0772 | 0.28                       | 0                               | 0.11               | 0.49                   | 0.11                 | 86.19                 | unclass. <i>Alphaproteobacteria</i> | unclass. <i>Alphaproteobacteria</i> | unclass. <i>Alphaproteobacteria</i> | <i>Alphaproteobacteria</i>    | <i>Proteobacteria</i>    | <i>Bacteria</i> |
| Otu0839 | 0.28                       | 0                               | 0.11               | 0.49                   | 0.11                 | 86.3                  | unclass. <i>Bacteria</i>            | unclass. <i>Bacteria</i>            | unclass. <i>Bacteria</i>            | unclass. <i>Bacteria</i>      | unclass. <i>Bacteria</i> | <i>Bacteria</i> |
| Otu0054 | 0                          | 0.2                             | 0.09               | 0.49                   | 0.09                 | 86.4                  | <i>Pseudomonas</i>                  | <i>Pseudomonadaceae</i>             | <i>Pseudomonadales</i>              | <i>Gammaproteobacteria</i>    | <i>Proteobacteria</i>    | <i>Bacteria</i> |
| Otu0180 | 0                          | 0.2                             | 0.09               | 0.49                   | 0.09                 | 86.49                 | <i>Reichenbachiella</i>             | <i>Flammeovirgaceae</i>             | <i>Sphingobacteriales</i>           | <i>Sphingobacteria</i>        | <i>Bacteroidetes</i>     | <i>Bacteria</i> |
| Otu0297 | 0                          | 0.2                             | 0.09               | 0.49                   | 0.09                 | 86.58                 | <i>Lutibacter</i>                   | <i>Flavobacteriaceae</i>            | <i>Flavobacteriales</i>             | <i>Flavobacteria</i>          | <i>Bacteroidetes</i>     | <i>Bacteria</i> |
| Otu0609 | 0                          | 0.2                             | 0.09               | 0.49                   | 0.09                 | 86.68                 | unclass. <i>Alphaproteobacteria</i> | unclass. <i>Alphaproteobacteria</i> | unclass. <i>Alphaproteobacteria</i> | <i>Alphaproteobacteria</i>    | <i>Proteobacteria</i>    | <i>Bacteria</i> |
| Otu0610 | 0                          | 0.2                             | 0.09               | 0.49                   | 0.09                 | 86.77                 | <i>Alteromonas</i>                  | <i>Alteromonadaceae</i>             | <i>Alteromonadales</i>              | <i>Gammaproteobacteria</i>    | <i>Proteobacteria</i>    | <i>Bacteria</i> |
| Otu0612 | 0                          | 0.2                             | 0.09               | 0.49                   | 0.09                 | 86.87                 | unclass. <i>Alteromonadales</i>     | unclass. <i>Alteromonadales</i>     | <i>Alteromonadales</i>              | <i>Gammaproteobacteria</i>    | <i>Proteobacteria</i>    | <i>Bacteria</i> |
| Otu0613 | 0                          | 0.2                             | 0.09               | 0.49                   | 0.09                 | 86.96                 | <i>Ulvibacter</i>                   | <i>Flavobacteriaceae</i>            | <i>Flavobacteriales</i>             | <i>Flavobacteria</i>          | <i>Bacteroidetes</i>     | <i>Bacteria</i> |
| Otu0614 | 0                          | 0.2                             | 0.09               | 0.49                   | 0.09                 | 87.05                 | unclass. <i>Flavobacteriaceae</i>   | <i>Flavobacteriaceae</i>            | <i>Flavobacteriales</i>             | <i>Flavobacteria</i>          | <i>Bacteroidetes</i>     | <i>Bacteria</i> |
| Otu0118 | 0                          | 0.2                             | 0.09               | 0.49                   | 0.09                 | 87.15                 | <i>Colwellia</i>                    | <i>Colwelliaceae</i>                | <i>Alteromonadales</i>              | <i>Gammaproteobacteria</i>    | <i>Proteobacteria</i>    | <i>Bacteria</i> |
| Otu0544 | 0                          | 0.2                             | 0.09               | 0.49                   | 0.09                 | 87.24                 | <i>Alteromonas</i>                  | <i>Alteromonadaceae</i>             | <i>Alteromonadales</i>              | <i>Gammaproteobacteria</i>    | <i>Proteobacteria</i>    | <i>Bacteria</i> |
| Otu0561 | 0                          | 0.2                             | 0.09               | 0.49                   | 0.09                 | 87.33                 | <i>Cellulophaga</i>                 | <i>Flavobacteriaceae</i>            | <i>Flavobacteriales</i>             | <i>Flavobacteria</i>          | <i>Bacteroidetes</i>     | <i>Bacteria</i> |
| Otu0601 | 0                          | 0.2                             | 0.09               | 0.49                   | 0.09                 | 87.43                 | unclass. <i>Flammeovirgaceae</i>    | <i>Flammeovirgaceae</i>             | <i>Sphingobacteriales</i>           | <i>Sphingobacteria</i>        | <i>Bacteroidetes</i>     | <i>Bacteria</i> |
| Otu0602 | 0                          | 0.2                             | 0.09               | 0.49                   | 0.09                 | 87.52                 | <i>Maribacter</i>                   | <i>Flavobacteriaceae</i>            | <i>Flavobacteriales</i>             | <i>Flavobacteria</i>          | <i>Bacteroidetes</i>     | <i>Bacteria</i> |
| Otu0603 | 0                          | 0.2                             | 0.09               | 0.49                   | 0.09                 | 87.61                 | unclass. <i>Sphingobacteriales</i>  | unclass. <i>Sphingobacteriales</i>  | <i>Sphingobacteriales</i>           | <i>Sphingobacteria</i>        | <i>Bacteroidetes</i>     | <i>Bacteria</i> |
| Otu0605 | 0                          | 0.2                             | 0.09               | 0.49                   | 0.09                 | 87.7                  | unclass. <i>Flavobacteriaceae</i>   | <i>Flavobacteriaceae</i>            | <i>Flavobacteriales</i>             | <i>Flavobacteria</i>          | <i>Bacteroidetes</i>     | <i>Bacteria</i> |
| Otu0167 | 0.2                        | 0                               | 0.09               | 0.49                   | 0.09                 | 87.8                  | unclass. <i>Rhodobacteraceae</i>    | <i>Rhodobacteraceae</i>             | <i>Rhodobacterales</i>              | <i>Alphaproteobacteria</i>    | <i>Proteobacteria</i>    | <i>Bacteria</i> |
| Otu0213 | 0.2                        | 0                               | 0.09               | 0.49                   | 0.09                 | 87.89                 | unclass. <i>Gammaproteobacteria</i> | unclass. <i>Gammaproteobacteria</i> | unclass. <i>Gammaproteobacteria</i> | <i>Gammaproteobacteria</i>    | <i>Proteobacteria</i>    | <i>Bacteria</i> |
| Otu0290 | 0.2                        | 0                               | 0.09               | 0.49                   | 0.09                 | 87.98                 | unclass. <i>Flavobacteriaceae</i>   | <i>Flavobacteriaceae</i>            | <i>Flavobacteriales</i>             | <i>Flavobacteria</i>          | <i>Bacteroidetes</i>     | <i>Bacteria</i> |
| Otu0464 | 0.2                        | 0                               | 0.09               | 0.49                   | 0.09                 | 88.07                 | unclass. <i>Bacteroidetes</i>       | unclass. <i>Bacteroidetes</i>       | unclass. <i>Bacteroidetes</i>       | unclass. <i>Bacteroidetes</i> | <i>Bacteroidetes</i>     | <i>Bacteria</i> |

| OTU     | Av. A <sub>i</sub><br>(no) | Av. A <sub>i</sub><br>(initial) | Av. δ <sub>i</sub> | Av. δ <sub>i</sub> /SD | Av. δ <sub>i</sub> % | ΣAv. δ <sub>i</sub> % | Genus                               | Family                              | Order                               | Class                          | Phylum                   | Domain          |
|---------|----------------------------|---------------------------------|--------------------|------------------------|----------------------|-----------------------|-------------------------------------|-------------------------------------|-------------------------------------|--------------------------------|--------------------------|-----------------|
| Otu0482 | 0.2                        | 0                               | 0.09               | 0.49                   | 0.09                 | 88.16                 | unclass. <i>Microbacteriaceae</i>   | <i>Microbacteriaceae</i>            | <i>Actinomycetales</i>              | <i>Actinobacteria</i>          | <i>Actinobacteria</i>    | <i>Bacteria</i> |
| Otu0594 | 0.2                        | 0                               | 0.09               | 0.49                   | 0.09                 | 88.25                 | unclass. <i>Bacteria</i>            | unclass. <i>Bacteria</i>            | unclass. <i>Bacteria</i>            | unclass. <i>Bacteria</i>       | unclass. <i>Bacteria</i> | <i>Bacteria</i> |
| Otu0666 | 0.2                        | 0                               | 0.09               | 0.49                   | 0.09                 | 88.35                 | unclass. <i>Deltaproteobacteria</i> | unclass. <i>Deltaproteobacteria</i> | unclass. <i>Deltaproteobacteria</i> | <i>Deltaproteobacteria</i>     | <i>Proteobacteria</i>    | <i>Bacteria</i> |
| Otu0702 | 0.2                        | 0                               | 0.09               | 0.49                   | 0.09                 | 88.44                 | unclass. <i>Flavobacteriales</i>    | unclass. <i>Flavobacteriales</i>    | <i>Flavobacteriales</i>             | <i>Flavobacteria</i>           | <i>Bacteroidetes</i>     | <i>Bacteria</i> |
| Otu0709 | 0.2                        | 0                               | 0.09               | 0.49                   | 0.09                 | 88.53                 | unclass. <i>Bacteria</i>            | unclass. <i>Bacteria</i>            | unclass. <i>Bacteria</i>            | unclass. <i>Bacteria</i>       | unclass. <i>Bacteria</i> | <i>Bacteria</i> |
| Otu0712 | 0.2                        | 0                               | 0.09               | 0.49                   | 0.09                 | 88.62                 | unclass. <i>Alphaproteobacteria</i> | unclass. <i>Alphaproteobacteria</i> | unclass. <i>Alphaproteobacteria</i> | <i>Alphaproteobacteria</i>     | <i>Proteobacteria</i>    | <i>Bacteria</i> |
| Otu0719 | 0.2                        | 0                               | 0.09               | 0.49                   | 0.09                 | 88.71                 | unclass. <i>Flavobacteriales</i>    | unclass. <i>Flavobacteriales</i>    | <i>Flavobacteriales</i>             | <i>Flavobacteria</i>           | <i>Bacteroidetes</i>     | <i>Bacteria</i> |
| Otu0722 | 0.2                        | 0                               | 0.09               | 0.49                   | 0.09                 | 88.8                  | unclass. <i>Rhodobacteraceae</i>    | <i>Rhodobacteraceae</i>             | <i>Rhodobacterales</i>              | <i>Alphaproteobacteria</i>     | <i>Proteobacteria</i>    | <i>Bacteria</i> |
| Otu0723 | 0.2                        | 0                               | 0.09               | 0.49                   | 0.09                 | 88.9                  | unclass. <i>Microbacteriaceae</i>   | <i>Microbacteriaceae</i>            | <i>Actinomycetales</i>              | <i>Actinobacteria</i>          | <i>Actinobacteria</i>    | <i>Bacteria</i> |
| Otu0726 | 0.2                        | 0                               | 0.09               | 0.49                   | 0.09                 | 88.99                 | unclass. <i>Bacteroidetes</i>       | unclass. <i>Bacteroidetes</i>       | unclass. <i>Bacteroidetes</i>       | unclass. <i>Bacteroidetes</i>  | <i>Bacteroidetes</i>     | <i>Bacteria</i> |
| Otu0728 | 0.2                        | 0                               | 0.09               | 0.49                   | 0.09                 | 89.08                 | unclass. <i>Gammaproteobacteria</i> | unclass. <i>Gammaproteobacteria</i> | unclass. <i>Gammaproteobacteria</i> | <i>Gammaproteobacteria</i>     | <i>Proteobacteria</i>    | <i>Bacteria</i> |
| Otu0729 | 0.2                        | 0                               | 0.09               | 0.49                   | 0.09                 | 89.17                 | unclass. <i>Bacteroidetes</i>       | unclass. <i>Bacteroidetes</i>       | unclass. <i>Bacteroidetes</i>       | unclass. <i>Bacteroidetes</i>  | <i>Bacteroidetes</i>     | <i>Bacteria</i> |
| Otu0731 | 0.2                        | 0                               | 0.09               | 0.49                   | 0.09                 | 89.26                 | <i>Lentisphaera</i>                 | <i>Lentisphaeraceae</i>             | <i>Lentisphaerales</i>              | <i>Lentisphaeria</i>           | <i>Lentisphaerae</i>     | <i>Bacteria</i> |
| Otu0747 | 0.2                        | 0                               | 0.09               | 0.49                   | 0.09                 | 89.35                 | unclass. <i>Rhodobacteraceae</i>    | <i>Rhodobacteraceae</i>             | <i>Rhodobacterales</i>              | <i>Alphaproteobacteria</i>     | <i>Proteobacteria</i>    | <i>Bacteria</i> |
| Otu0748 | 0.2                        | 0                               | 0.09               | 0.49                   | 0.09                 | 89.45                 | unclass. <i>Proteobacteria</i>      | unclass. <i>Proteobacteria</i>      | unclass. <i>Proteobacteria</i>      | unclass. <i>Proteobacteria</i> | <i>Proteobacteria</i>    | <i>Bacteria</i> |
| Otu0749 | 0.2                        | 0                               | 0.09               | 0.49                   | 0.09                 | 89.54                 | unclass. <i>Gammaproteobacteria</i> | unclass. <i>Gammaproteobacteria</i> | unclass. <i>Gammaproteobacteria</i> | <i>Gammaproteobacteria</i>     | <i>Proteobacteria</i>    | <i>Bacteria</i> |
| Otu0750 | 0.2                        | 0                               | 0.09               | 0.49                   | 0.09                 | 89.63                 | unclass. <i>Gammaproteobacteria</i> | unclass. <i>Gammaproteobacteria</i> | unclass. <i>Gammaproteobacteria</i> | <i>Gammaproteobacteria</i>     | <i>Proteobacteria</i>    | <i>Bacteria</i> |
| Otu0083 | 0.2                        | 0                               | 0.09               | 0.49                   | 0.09                 | 89.72                 | unclass. <i>Rhodobacteraceae</i>    | <i>Rhodobacteraceae</i>             | <i>Rhodobacterales</i>              | <i>Alphaproteobacteria</i>     | <i>Proteobacteria</i>    | <i>Bacteria</i> |
| Otu0174 | 0.2                        | 0                               | 0.09               | 0.49                   | 0.09                 | 89.81                 | unclass. <i>Flavobacteriaceae</i>   | <i>Flavobacteriaceae</i>            | <i>Flavobacteriales</i>             | <i>Flavobacteria</i>           | <i>Bacteroidetes</i>     | <i>Bacteria</i> |
| Otu0178 | 0.2                        | 0                               | 0.09               | 0.49                   | 0.09                 | 89.9                  | unclass. <i>Actinobacteria</i>      | unclass. <i>Actinobacteria</i>      | unclass. <i>Actinobacteria</i>      | <i>Actinobacteria</i>          | <i>Actinobacteria</i>    | <i>Bacteria</i> |
| Otu0381 | 0.2                        | 0                               | 0.09               | 0.49                   | 0.09                 | 89.99                 | unclass. <i>Chitinophagaceae</i>    | <i>Chitinophagaceae</i>             | <i>Sphingobacteriales</i>           | <i>Sphingobacteria</i>         | <i>Bacteroidetes</i>     | <i>Bacteria</i> |
| Otu0483 | 0.2                        | 0                               | 0.09               | 0.49                   | 0.09                 | 90.09                 | unclass. <i>Flavobacteriaceae</i>   | <i>Flavobacteriaceae</i>            | <i>Flavobacteriales</i>             | <i>Flavobacteria</i>           | <i>Bacteroidetes</i>     | <i>Bacteria</i> |

| OTU                                                                                              | Av.A <sub>i</sub><br>(serial) | Av.A <sub>i</sub><br>(initial) | Av.δ <sub>i</sub> | Av.δ <sub>i</sub> /SD | Av.δ <sub>i</sub> % | ΣAv.δ <sub>i</sub> % | Genus                               | Family                              | Order                               | Class                        | Phylum                | Domain          |
|--------------------------------------------------------------------------------------------------|-------------------------------|--------------------------------|-------------------|-----------------------|---------------------|----------------------|-------------------------------------|-------------------------------------|-------------------------------------|------------------------------|-----------------------|-----------------|
| Summer pH <i>in situ</i> 'serial dilution' vs. 'initial dilution' (average dissimilarity: 85.6%) |                               |                                |                   |                       |                     |                      |                                     |                                     |                                     |                              |                       |                 |
| Otu0109                                                                                          | 0.88                          | 18.3                           | 10.68             | 4.51                  | 12.47               | 12.47                | <i>Alteromonas</i>                  | <i>Alteromonadaceae</i>             | <i>Alteromonadales</i>              | <i>Gammaproteobacteria</i>   | <i>Proteobacteria</i> | <i>Bacteria</i> |
| Otu0132                                                                                          | 11.11                         | 0                              | 7.2               | 1.38                  | 8.41                | 20.88                | unclass. <i>Alteromonadales</i>     | unclass. <i>Alteromonadales</i>     | <i>Alteromonadales</i>              | <i>Gammaproteobacteria</i>   | <i>Proteobacteria</i> | <i>Bacteria</i> |
| Otu0459                                                                                          | 10.06                         | 0.68                           | 5.45              | 1.85                  | 6.37                | 27.25                | <i>Croceibacter</i>                 | <i>Flavobacteriaceae</i>            | <i>Flavobacteriales</i>             | <i>Flavobacteria</i>         | <i>Bacteroidetes</i>  | <i>Bacteria</i> |
| Otu0471                                                                                          | 6.52                          | 0                              | 3.99              | 2.53                  | 4.66                | 31.9                 | <i>Oceaniserpentilla</i>            | <i>Oceanospirillaceae</i>           | <i>Oceanospirillales</i>            | <i>Gammaproteobacteria</i>   | <i>Proteobacteria</i> | <i>Bacteria</i> |
| Otu0125                                                                                          | 4.15                          | 0.48                           | 2.23              | 1.74                  | 2.6                 | 34.51                | <i>Leeuwenhoekella</i>              | <i>Flavobacteriaceae</i>            | <i>Flavobacteriales</i>             | <i>Flavobacteria</i>         | <i>Bacteroidetes</i>  | <i>Bacteria</i> |
| Otu0035                                                                                          | 0                             | 3.47                           | 2.08              | 4.32                  | 2.43                | 36.94                | <i>Colwellia</i>                    | <i>Colwelliaceae</i>                | <i>Alteromonadales</i>              | <i>Gammaproteobacteria</i>   | <i>Proteobacteria</i> | <i>Bacteria</i> |
| Otu0041                                                                                          | 0.88                          | 3.93                           | 1.91              | 1.56                  | 2.23                | 39.17                | <i>Sulfitobacter</i>                | <i>Rhodobacteraceae</i>             | <i>Rhodobacterales</i>              | <i>Alphaproteobacteria</i>   | <i>Proteobacteria</i> | <i>Bacteria</i> |
| Otu0521                                                                                          | 4.58                          | 3.2                            | 1.83              | 1.34                  | 2.13                | 41.31                | unclass. <i>Rhodobacteraceae</i>    | <i>Rhodobacteraceae</i>             | <i>Rhodobacterales</i>              | <i>Alphaproteobacteria</i>   | <i>Proteobacteria</i> | <i>Bacteria</i> |
| Otu0460                                                                                          | 3.42                          | 1.32                           | 1.67              | 1.14                  | 1.95                | 43.26                | <i>Arcobacter</i>                   | <i>Campylobacteraceae</i>           | <i>Campylobacterales</i>            | <i>Epsilonproteobacteria</i> | <i>Proteobacteria</i> | <i>Bacteria</i> |
| Otu0115                                                                                          | 0                             | 2.35                           | 1.43              | 3.62                  | 1.67                | 44.92                | <i>Glacielcola</i>                  | <i>Alteromonadaceae</i>             | <i>Alteromonadales</i>              | <i>Gammaproteobacteria</i>   | <i>Proteobacteria</i> | <i>Bacteria</i> |
| Otu0523                                                                                          | 2.3                           | 0                              | 1.3               | 1.57                  | 1.52                | 46.44                | <i>Pseudidiomarina</i>              | <i>Idiomarinaceae</i>               | <i>Alteromonadales</i>              | <i>Gammaproteobacteria</i>   | <i>Proteobacteria</i> | <i>Bacteria</i> |
| Otu0532                                                                                          | 0.88                          | 2.73                           | 1.18              | 1.49                  | 1.38                | 47.82                | unclass. <i>Rhodobacteraceae</i>    | <i>Rhodobacteraceae</i>             | <i>Rhodobacterales</i>              | <i>Alphaproteobacteria</i>   | <i>Proteobacteria</i> | <i>Bacteria</i> |
| Otu0027                                                                                          | 1.11                          | 2.28                           | 1.17              | 1.62                  | 1.37                | 49.19                | <i>Pseudoalteromonas</i>            | <i>Pseudoalteromonadaceae</i>       | <i>Alteromonadales</i>              | <i>Gammaproteobacteria</i>   | <i>Proteobacteria</i> | <i>Bacteria</i> |
| Otu0487                                                                                          | 1.38                          | 2.26                           | 1.13              | 2.4                   | 1.32                | 50.51                | unclass. <i>Chitinophagaceae</i>    | <i>Chitinophagaceae</i>             | <i>Sphingobacteriales</i>           | <i>Sphingobacteria</i>       | <i>Bacteroidetes</i>  | <i>Bacteria</i> |
| Otu0588                                                                                          | 0                             | 1.8                            | 1.08              | 3.02                  | 1.26                | 51.78                | <i>Amphritea</i>                    | <i>Oceanospirillaceae</i>           | <i>Oceanospirillales</i>            | <i>Gammaproteobacteria</i>   | <i>Proteobacteria</i> | <i>Bacteria</i> |
| Otu0576                                                                                          | 0                             | 1.81                           | 1.08              | 2.2                   | 1.26                | 53.03                | unclass. <i>Alphaproteobacteria</i> | unclass. <i>Alphaproteobacteria</i> | unclass. <i>Alphaproteobacteria</i> | <i>Alphaproteobacteria</i>   | <i>Proteobacteria</i> | <i>Bacteria</i> |
| Otu0524                                                                                          | 1.85                          | 0                              | 1.06              | 1.81                  | 1.24                | 54.27                | <i>Pseudidiomarina</i>              | <i>Idiomarinaceae</i>               | <i>Alteromonadales</i>              | <i>Gammaproteobacteria</i>   | <i>Proteobacteria</i> | <i>Bacteria</i> |
| Otu0110                                                                                          | 0.55                          | 2.08                           | 1.01              | 1.76                  | 1.18                | 55.45                | unclass. <i>Rhodobacteraceae</i>    | <i>Rhodobacteraceae</i>             | <i>Rhodobacterales</i>              | <i>Alphaproteobacteria</i>   | <i>Proteobacteria</i> | <i>Bacteria</i> |
| Otu0522                                                                                          | 1.75                          | 0                              | 0.99              | 1.79                  | 1.16                | 56.61                | unclass. <i>Flavobacteriaceae</i>   | <i>Flavobacteriaceae</i>            | <i>Flavobacteriales</i>             | <i>Flavobacteria</i>         | <i>Bacteroidetes</i>  | <i>Bacteria</i> |
| Otu0531                                                                                          | 1.7                           | 0                              | 0.97              | 1.58                  | 1.13                | 57.75                | unclass. <i>Flavobacteriaceae</i>   | <i>Flavobacteriaceae</i>            | <i>Flavobacteriales</i>             | <i>Flavobacteria</i>         | <i>Bacteroidetes</i>  | <i>Bacteria</i> |
| Otu0553                                                                                          | 0.2                           | 1.75                           | 0.93              | 2.17                  | 1.09                | 58.83                | <i>Vibrio</i>                       | <i>Vibrionaceae</i>                 | <i>Vibrionales</i>                  | <i>Gammaproteobacteria</i>   | <i>Proteobacteria</i> | <i>Bacteria</i> |
| Otu0551                                                                                          | 0.2                           | 1.57                           | 0.89              | 1.5                   | 1.04                | 59.87                | <i>Arcobacter</i>                   | <i>Campylobacteraceae</i>           | <i>Campylobacterales</i>            | <i>Epsilonproteobacteria</i> | <i>Proteobacteria</i> | <i>Bacteria</i> |
| Otu0537                                                                                          | 1.38                          | 0                              | 0.8               | 1.77                  | 0.93                | 60.8                 | unclass. <i>Flavobacteriaceae</i>   | <i>Flavobacteriaceae</i>            | <i>Flavobacteriales</i>             | <i>Flavobacteria</i>         | <i>Bacteroidetes</i>  | <i>Bacteria</i> |
| Otu0526                                                                                          | 1.39                          | 0.2                            | 0.78              | 1.06                  | 0.91                | 61.71                | <i>Maribacter</i>                   | <i>Flavobacteriaceae</i>            | <i>Flavobacteriales</i>             | <i>Flavobacteria</i>         | <i>Bacteroidetes</i>  | <i>Bacteria</i> |

| OTU     | Av. A <sub>i</sub><br>(serial) | Av. A <sub>i</sub><br>(initial) | Av. δ <sub>i</sub> | Av. δ <sub>i</sub> /SD | Av. δ <sub>i</sub> % | ΣAv. δ <sub>i</sub> % | Genus                               | Family                              | Order                               | Class                         | Phylum                   | Domain          |
|---------|--------------------------------|---------------------------------|--------------------|------------------------|----------------------|-----------------------|-------------------------------------|-------------------------------------|-------------------------------------|-------------------------------|--------------------------|-----------------|
| Otu0107 | 0                              | 1.25                            | 0.74               | 1.1                    | 0.87                 | 62.58                 | unclass. <i>Rhodobacteraceae</i>    | <i>Rhodobacteraceae</i>             | <i>Rhodobacterales</i>              | <i>Alphaproteobacteria</i>    | <i>Proteobacteria</i>    | <i>Bacteria</i> |
| Otu0583 | 0                              | 1.17                            | 0.71               | 4.08                   | 0.83                 | 63.4                  | unclass. <i>Flavobacteriaceae</i>   | <i>Flavobacteriaceae</i>            | <i>Flavobacteriales</i>             | <i>Flavobacteria</i>          | <i>Bacteroidetes</i>     | <i>Bacteria</i> |
| Otu0123 | 1.08                           | 0                               | 0.69               | 1.18                   | 0.81                 | 64.21                 | unclass. <i>Gammaproteobacteria</i> | unclass. <i>Gammaproteobacteria</i> | unclass. <i>Gammaproteobacteria</i> | <i>Gammaproteobacteria</i>    | <i>Proteobacteria</i>    | <i>Bacteria</i> |
| Otu0549 | 1.26                           | 0                               | 0.67               | 0.49                   | 0.78                 | 64.99                 | unclass. <i>Bacteroidetes</i>       | unclass. <i>Bacteroidetes</i>       | unclass. <i>Bacteroidetes</i>       | unclass. <i>Bacteroidetes</i> | <i>Bacteroidetes</i>     | <i>Bacteria</i> |
| Otu0615 | 0                              | 1.12                            | 0.66               | 0.84                   | 0.78                 | 65.77                 | <i>Neptuniibacter</i>               | <i>Oceanospirillaceae</i>           | <i>Oceanospirillales</i>            | <i>Gammaproteobacteria</i>    | <i>Proteobacteria</i>    | <i>Bacteria</i> |
| Otu0525 | 2.2                            | 1.62                            | 0.64               | 1.6                    | 0.74                 | 66.51                 | <i>Reinekea</i>                     | <i>Oceanospirillaceae</i>           | <i>Oceanospirillales</i>            | <i>Gammaproteobacteria</i>    | <i>Proteobacteria</i>    | <i>Bacteria</i> |
| Otu0489 | 0                              | 1                               | 0.61               | 6.3                    | 0.71                 | 67.22                 | unclass. <i>Vibrionaceae</i>        | <i>Vibrionaceae</i>                 | <i>Vibrionales</i>                  | <i>Gammaproteobacteria</i>    | <i>Proteobacteria</i>    | <i>Bacteria</i> |
| Otu0535 | 0.48                           | 0.75                            | 0.6                | 0.78                   | 0.7                  | 67.92                 | <i>Loktanela</i>                    | <i>Rhodobacteraceae</i>             | <i>Rhodobacterales</i>              | <i>Alphaproteobacteria</i>    | <i>Proteobacteria</i>    | <i>Bacteria</i> |
| Otu0261 | 0.4                            | 1.24                            | 0.59               | 1.51                   | 0.69                 | 68.61                 | <i>Winogradskyella</i>              | <i>Flavobacteriaceae</i>            | <i>Flavobacteriales</i>             | <i>Flavobacteria</i>          | <i>Bacteroidetes</i>     | <i>Bacteria</i> |
| Otu0578 | 0                              | 0.97                            | 0.58               | 1.69                   | 0.67                 | 69.28                 | <i>Winogradskyella</i>              | <i>Flavobacteriaceae</i>            | <i>Flavobacteriales</i>             | <i>Flavobacteria</i>          | <i>Bacteroidetes</i>     | <i>Bacteria</i> |
| Otu0542 | 0.2                            | 1.09                            | 0.58               | 1.47                   | 0.67                 | 69.95                 | unclass. <i>Oceanospirillaceae</i>  | <i>Oceanospirillaceae</i>           | <i>Oceanospirillales</i>            | <i>Gammaproteobacteria</i>    | <i>Proteobacteria</i>    | <i>Bacteria</i> |
| Otu0580 | 0                              | 0.91                            | 0.54               | 1.17                   | 0.63                 | 70.58                 | <i>Neptuniibacter</i>               | <i>Oceanospirillaceae</i>           | <i>Oceanospirillales</i>            | <i>Gammaproteobacteria</i>    | <i>Proteobacteria</i>    | <i>Bacteria</i> |
| Otu0029 | 1                              | 0                               | 0.53               | 0.49                   | 0.62                 | 71.2                  | unclass. <i>Bacteroidetes</i>       | unclass. <i>Bacteroidetes</i>       | unclass. <i>Bacteroidetes</i>       | unclass. <i>Bacteroidetes</i> | <i>Bacteroidetes</i>     | <i>Bacteria</i> |
| Otu0036 | 0.28                           | 0.95                            | 0.53               | 1.52                   | 0.61                 | 71.81                 | <i>Glaciecola</i>                   | <i>Alteromonadaceae</i>             | <i>Alteromonadales</i>              | <i>Gammaproteobacteria</i>    | <i>Proteobacteria</i>    | <i>Bacteria</i> |
| Otu0234 | 0                              | 0.85                            | 0.52               | 0.77                   | 0.61                 | 72.42                 | <i>Arcobacter</i>                   | <i>Campylobacteraceae</i>           | <i>Campylobacteriales</i>           | <i>Epsilonproteobacteria</i>  | <i>Proteobacteria</i>    | <i>Bacteria</i> |
| Otu0548 | 0.98                           | 0                               | 0.52               | 0.49                   | 0.6                  | 73.02                 | unclass. <i>Bacteroidetes</i>       | unclass. <i>Bacteroidetes</i>       | unclass. <i>Bacteroidetes</i>       | unclass. <i>Bacteroidetes</i> | <i>Bacteroidetes</i>     | <i>Bacteria</i> |
| Otu0165 | 0                              | 0.83                            | 0.5                | 1.1                    | 0.58                 | 73.61                 | <i>Marinomonas</i>                  | <i>Oceanospirillaceae</i>           | <i>Oceanospirillales</i>            | <i>Gammaproteobacteria</i>    | <i>Proteobacteria</i>    | <i>Bacteria</i> |
| Otu0599 | 0                              | 0.8                             | 0.49               | 1.85                   | 0.58                 | 74.18                 | <i>Winogradskyella</i>              | <i>Flavobacteriaceae</i>            | <i>Flavobacteriales</i>             | <i>Flavobacteria</i>          | <i>Bacteroidetes</i>     | <i>Bacteria</i> |
| Otu0232 | 0                              | 0.8                             | 0.49               | 0.97                   | 0.57                 | 74.76                 | unclass. <i>Rhodobacteraceae</i>    | <i>Rhodobacteraceae</i>             | <i>Rhodobacterales</i>              | <i>Alphaproteobacteria</i>    | <i>Proteobacteria</i>    | <i>Bacteria</i> |
| Otu0527 | 0.83                           | 0                               | 0.49               | 1.12                   | 0.57                 | 75.33                 | <i>Idiomarina</i>                   | <i>Idiomarinaceae</i>               | <i>Alteromonadales</i>              | <i>Gammaproteobacteria</i>    | <i>Proteobacteria</i>    | <i>Bacteria</i> |
| Otu0533 | 0.55                           | 0.95                            | 0.48               | 1.23                   | 0.56                 | 75.89                 | <i>Nisaea</i>                       | <i>Rhodospirillaceae</i>            | <i>Rhodospirillales</i>             | <i>Alphaproteobacteria</i>    | <i>Proteobacteria</i>    | <i>Bacteria</i> |
| Otu0577 | 0                              | 0.73                            | 0.41               | 0.77                   | 0.47                 | 76.37                 | unclass. <i>Bacteroidetes</i>       | unclass. <i>Bacteroidetes</i>       | unclass. <i>Bacteroidetes</i>       | unclass. <i>Bacteroidetes</i> | <i>Bacteroidetes</i>     | <i>Bacteria</i> |
| Otu0346 | 0                              | 0.68                            | 0.41               | 1.14                   | 0.47                 | 76.84                 | unclass. <i>Bacteria</i>            | unclass. <i>Bacteria</i>            | unclass. <i>Bacteria</i>            | unclass. <i>Bacteria</i>      | unclass. <i>Bacteria</i> | <i>Bacteria</i> |
| Otu0010 | 0                              | 0.68                            | 0.38               | 0.78                   | 0.44                 | 77.29                 | unclass. <i>Flavobacteriaceae</i>   | <i>Flavobacteriaceae</i>            | <i>Flavobacteriales</i>             | <i>Flavobacteria</i>          | <i>Bacteroidetes</i>     | <i>Bacteria</i> |
| Otu0103 | 0.2                            | 0.6                             | 0.38               | 0.87                   | 0.44                 | 77.73                 | <i>Pseudomonas</i>                  | <i>Pseudomonadaceae</i>             | <i>Pseudomonadales</i>              | <i>Gammaproteobacteria</i>    | <i>Proteobacteria</i>    | <i>Bacteria</i> |
| Otu0113 | 0                              | 0.55                            | 0.37               | 0.74                   | 0.43                 | 78.16                 | <i>Colwellia</i>                    | <i>Colwelliaceae</i>                | <i>Alteromonadales</i>              | <i>Gammaproteobacteria</i>    | <i>Proteobacteria</i>    | <i>Bacteria</i> |
| Otu0575 | 0                              | 0.65                            | 0.37               | 0.7                    | 0.43                 | 78.58                 | unclass. <i>Bacteroidetes</i>       | unclass. <i>Bacteroidetes</i>       | unclass. <i>Bacteroidetes</i>       | unclass. <i>Bacteroidetes</i> | <i>Bacteroidetes</i>     | <i>Bacteria</i> |

| OTU     | Av.A <sub>i</sub><br>(serial) | Av.A <sub>i</sub><br>(initial) | Av.δ <sub>i</sub> | Av.δ <sub>i</sub> /SD | Av.δ <sub>i</sub> % | ΣAv.δ <sub>i</sub> % | Genus                               | Family                              | Order                               | Class                          | Phylum                   | Domain          |
|---------|-------------------------------|--------------------------------|-------------------|-----------------------|---------------------|----------------------|-------------------------------------|-------------------------------------|-------------------------------------|--------------------------------|--------------------------|-----------------|
| Otu0607 | 0                             | 0.55                           | 0.35              | 0.72                  | 0.41                | 78.99                | unclass. <i>Flavobacteriaceae</i>   | <i>Flavobacteriaceae</i>            | <i>Flavobacteriales</i>             | <i>Flavobacteria</i>           | <i>Bacteroidetes</i>     | <i>Bacteria</i> |
| Otu0244 | 0                             | 0.55                           | 0.35              | 0.72                  | 0.41                | 79.4                 | unclass. <i>Rhodobacteraceae</i>    | <i>Rhodobacteraceae</i>             | <i>Rhodobacterales</i>              | <i>Alphaproteobacteria</i>     | <i>Proteobacteria</i>    | <i>Bacteria</i> |
| Otu0597 | 0                             | 0.55                           | 0.35              | 0.73                  | 0.4                 | 79.8                 | <i>Arenibacter</i>                  | <i>Flavobacteriaceae</i>            | <i>Flavobacteriales</i>             | <i>Flavobacteria</i>           | <i>Bacteroidetes</i>     | <i>Bacteria</i> |
| Otu0547 | 0.2                           | 0.48                           | 0.32              | 0.84                  | 0.37                | 80.18                | <i>Phenylobacterium</i>             | <i>Caulobacteraceae</i>             | <i>Caulobacterales</i>              | <i>Alphaproteobacteria</i>     | <i>Proteobacteria</i>    | <i>Bacteria</i> |
| Otu0538 | 0.48                          | 0                              | 0.31              | 0.79                  | 0.36                | 80.54                | <i>Oceaniserpentilla</i>            | <i>Oceanospirillaceae</i>           | <i>Oceanospirillales</i>            | <i>Gammaproteobacteria</i>     | <i>Proteobacteria</i>    | <i>Bacteria</i> |
| Otu0180 | 0.48                          | 0.2                            | 0.31              | 0.89                  | 0.36                | 80.9                 | <i>Reichenbachiella</i>             | <i>Flammeovirgaceae</i>             | <i>Sphingobacteriales</i>           | <i>Sphingobacteria</i>         | <i>Bacteroidetes</i>     | <i>Bacteria</i> |
| Otu0584 | 0                             | 0.55                           | 0.31              | 0.74                  | 0.36                | 81.26                | unclass. <i>Proteobacteria</i>      | unclass. <i>Proteobacteria</i>      | unclass. <i>Proteobacteria</i>      | unclass. <i>Proteobacteria</i> | <i>Proteobacteria</i>    | <i>Bacteria</i> |
| Otu0608 | 0                             | 0.48                           | 0.31              | 0.75                  | 0.36                | 81.61                | unclass. <i>Flavobacteriaceae</i>   | <i>Flavobacteriaceae</i>            | <i>Flavobacteriales</i>             | <i>Flavobacteria</i>           | <i>Bacteroidetes</i>     | <i>Bacteria</i> |
| Otu0324 | 0                             | 0.48                           | 0.3               | 0.78                  | 0.35                | 81.96                | <i>Nisaea</i>                       | <i>Rhodospirillaceae</i>            | <i>Rhodospirillales</i>             | <i>Alphaproteobacteria</i>     | <i>Proteobacteria</i>    | <i>Bacteria</i> |
| Otu0596 | 0                             | 0.48                           | 0.28              | 0.77                  | 0.33                | 82.29                | <i>Neptunomonas</i>                 | <i>Oceanospirillaceae</i>           | <i>Oceanospirillales</i>            | <i>Gammaproteobacteria</i>     | <i>Proteobacteria</i>    | <i>Bacteria</i> |
| Otu0529 | 0.48                          | 0                              | 0.27              | 0.78                  | 0.32                | 82.61                | unclass. <i>Sphingobacteriales</i>  | unclass. <i>Sphingobacteriales</i>  | <i>Sphingobacteriales</i>           | <i>Sphingobacteria</i>         | <i>Bacteroidetes</i>     | <i>Bacteria</i> |
| Otu0423 | 0                             | 0.48                           | 0.27              | 0.77                  | 0.32                | 82.92                | unclass. <i>Flavobacteriaceae</i>   | <i>Flavobacteriaceae</i>            | <i>Flavobacteriales</i>             | <i>Flavobacteria</i>           | <i>Bacteroidetes</i>     | <i>Bacteria</i> |
| Otu0595 | 0                             | 0.48                           | 0.27              | 0.77                  | 0.32                | 83.24                | unclass. <i>Legionellaceae</i>      | <i>Legionellaceae</i>               | <i>Legionellales</i>                | <i>Gammaproteobacteria</i>     | <i>Proteobacteria</i>    | <i>Bacteria</i> |
| Otu0543 | 0                             | 0.48                           | 0.27              | 0.78                  | 0.32                | 83.56                | <i>Muricauda</i>                    | <i>Flavobacteriaceae</i>            | <i>Flavobacteriales</i>             | <i>Flavobacteria</i>           | <i>Bacteroidetes</i>     | <i>Bacteria</i> |
| Otu0632 | 0                             | 0.49                           | 0.27              | 0.49                  | 0.31                | 83.87                | unclass. <i>Flavobacteriaceae</i>   | <i>Flavobacteriaceae</i>            | <i>Flavobacteriales</i>             | <i>Flavobacteria</i>           | <i>Bacteroidetes</i>     | <i>Bacteria</i> |
| Otu0550 | 0.49                          | 0                              | 0.26              | 0.49                  | 0.3                 | 84.17                | unclass. <i>Flavobacteriales</i>    | unclass. <i>Flavobacteriales</i>    | <i>Flavobacteriales</i>             | <i>Flavobacteria</i>           | <i>Bacteroidetes</i>     | <i>Bacteria</i> |
| Otu0555 | 0.2                           | 0.4                            | 0.25              | 0.86                  | 0.29                | 84.46                | <i>Maricaulis</i>                   | <i>Hyphomonadaceae</i>              | <i>Caulobacterales</i>              | <i>Alphaproteobacteria</i>     | <i>Proteobacteria</i>    | <i>Bacteria</i> |
| Otu0568 | 0                             | 0.4                            | 0.25              | 0.78                  | 0.29                | 84.76                | unclass. <i>Flavobacteriales</i>    | unclass. <i>Flavobacteriales</i>    | <i>Flavobacteriales</i>             | <i>Flavobacteria</i>           | <i>Bacteroidetes</i>     | <i>Bacteria</i> |
| Otu0112 | 0                             | 0.4                            | 0.25              | 0.79                  | 0.29                | 85.05                | <i>Polaribacter</i>                 | <i>Flavobacteriaceae</i>            | <i>Flavobacteriales</i>             | <i>Flavobacteria</i>           | <i>Bacteroidetes</i>     | <i>Bacteria</i> |
| Otu0604 | 0                             | 0.4                            | 0.24              | 0.78                  | 0.29                | 85.33                | unclass. <i>Bacteroidetes</i>       | unclass. <i>Bacteroidetes</i>       | unclass. <i>Bacteroidetes</i>       | unclass. <i>Bacteroidetes</i>  | <i>Bacteroidetes</i>     | <i>Bacteria</i> |
| Otu0434 | 0                             | 0.4                            | 0.24              | 0.78                  | 0.28                | 85.61                | <i>Maribacter</i>                   | <i>Flavobacteriaceae</i>            | <i>Flavobacteriales</i>             | <i>Flavobacteria</i>           | <i>Bacteroidetes</i>     | <i>Bacteria</i> |
| Otu0598 | 0                             | 0.4                            | 0.24              | 0.78                  | 0.28                | 85.9                 | <i>Arcobacter</i>                   | <i>Campylobacteraceae</i>           | <i>Campylobacterales</i>            | <i>Epsilonproteobacteria</i>   | <i>Proteobacteria</i>    | <i>Bacteria</i> |
| Otu0534 | 0.4                           | 0                              | 0.24              | 0.79                  | 0.28                | 86.18                | unclass. <i>Alphaproteobacteria</i> | unclass. <i>Alphaproteobacteria</i> | unclass. <i>Alphaproteobacteria</i> | <i>Alphaproteobacteria</i>     | <i>Proteobacteria</i>    | <i>Bacteria</i> |
| Otu0564 | 0                             | 0.4                            | 0.23              | 0.49                  | 0.27                | 86.45                | unclass. <i>Bacteroidetes</i>       | unclass. <i>Bacteroidetes</i>       | unclass. <i>Bacteroidetes</i>       | unclass. <i>Bacteroidetes</i>  | <i>Bacteroidetes</i>     | <i>Bacteria</i> |
| Otu0616 | 0                             | 0.4                            | 0.23              | 0.49                  | 0.27                | 86.72                | unclass. <i>Bacteria</i>            | unclass. <i>Bacteria</i>            | unclass. <i>Bacteria</i>            | unclass. <i>Bacteria</i>       | unclass. <i>Bacteria</i> | <i>Bacteria</i> |
| Otu0536 | 0                             | 0.4                            | 0.23              | 0.79                  | 0.27                | 86.99                | <i>Maribacter</i>                   | <i>Flavobacteriaceae</i>            | <i>Flavobacteriales</i>             | <i>Flavobacteria</i>           | <i>Bacteroidetes</i>     | <i>Bacteria</i> |
| Otu0582 | 0                             | 0.4                            | 0.23              | 0.79                  | 0.27                | 87.26                | unclass. <i>Rhodobacteraceae</i>    | <i>Rhodobacteraceae</i>             | <i>Rhodobacterales</i>              | <i>Alphaproteobacteria</i>     | <i>Proteobacteria</i>    | <i>Bacteria</i> |

| OTU     | Av. A <sub>i</sub><br>(serial) | Av. A <sub>i</sub><br>(initiall) | Av. δ <sub>i</sub> | Av. δ <sub>i</sub> /SD | Av. δ <sub>i</sub> % | ∑Av. δ <sub>i</sub> % | Genus                          | Family                         | Order                          | Class                          | Phylum                | Domain          |
|---------|--------------------------------|----------------------------------|--------------------|------------------------|----------------------|-----------------------|--------------------------------|--------------------------------|--------------------------------|--------------------------------|-----------------------|-----------------|
| Otu0593 | 0                              | 0.4                              | 0.23               | 0.79                   | 0.27                 | 87.53                 | <i>Psychroserpens</i>          | <i>Flavobacteriaceae</i>       | <i>Flavobacteriales</i>        | <i>Flavobacteria</i>           | <i>Bacteroidetes</i>  | <i>Bacteria</i> |
| Otu0569 | 0                              | 0.4                              | 0.23               | 0.49                   | 0.27                 | 87.8                  | unclass. <i>Proteobacteria</i> | unclass. <i>Proteobacteria</i> | unclass. <i>Proteobacteria</i> | unclass. <i>Proteobacteria</i> | <i>Proteobacteria</i> | <i>Bacteria</i> |
| Otu0263 | 0                              | 0.4                              | 0.23               | 0.79                   | 0.26                 | 88.06                 | <i>Krokinobacter</i>           | <i>Flavobacteriaceae</i>       | <i>Flavobacteriales</i>        | <i>Flavobacteria</i>           | <i>Bacteroidetes</i>  | <i>Bacteria</i> |
| Otu0320 | 0                              | 0.4                              | 0.23               | 0.79                   | 0.26                 | 88.33                 | <i>Pseudoalteromonas</i>       | <i>Pseudoalteromonadaceae</i>  | <i>Alteromonadales</i>         | <i>Gammaproteobacteria</i>     | <i>Proteobacteria</i> | <i>Bacteria</i> |
| Otu0628 | 0                              | 0.4                              | 0.23               | 0.79                   | 0.26                 | 88.59                 | <i>Lacinutrix</i>              | <i>Flavobacteriaceae</i>       | <i>Flavobacteriales</i>        | <i>Flavobacteria</i>           | <i>Bacteroidetes</i>  | <i>Bacteria</i> |
| Otu0111 | 0                              | 0.4                              | 0.22               | 0.79                   | 0.26                 | 88.85                 | <i>Marinomonas</i>             | <i>Oceanospirillaceae</i>      | <i>Oceanospirillales</i>       | <i>Gammaproteobacteria</i>     | <i>Proteobacteria</i> | <i>Bacteria</i> |
| Otu0500 | 0                              | 0.4                              | 0.22               | 0.79                   | 0.26                 | 89.11                 | <i>Marinobacter</i>            | <i>Alteromonadaceae</i>        | <i>Alteromonadales</i>         | <i>Gammaproteobacteria</i>     | <i>Proteobacteria</i> | <i>Bacteria</i> |
| Otu0579 | 0                              | 0.35                             | 0.2                | 0.49                   | 0.23                 | 89.35                 | unclass. <i>Bacteroidetes</i>  | unclass. <i>Bacteroidetes</i>  | unclass. <i>Bacteroidetes</i>  | unclass. <i>Bacteroidetes</i>  | <i>Bacteroidetes</i>  | <i>Bacteria</i> |
| Otu0544 | 0.2                            | 0.2                              | 0.2                | 0.66                   | 0.23                 | 89.58                 | <i>Alteromonas</i>             | <i>Alteromonadaceae</i>        | <i>Alteromonadales</i>         | <i>Gammaproteobacteria</i>     | <i>Proteobacteria</i> | <i>Bacteria</i> |
| Otu0561 | 0.2                            | 0.2                              | 0.2                | 0.66                   | 0.23                 | 89.81                 | <i>Cellulophaga</i>            | <i>Flavobacteriaceae</i>       | <i>Flavobacteriales</i>        | <i>Flavobacteria</i>           | <i>Bacteroidetes</i>  | <i>Bacteria</i> |
| Otu0005 | 0.2                            | 0.2                              | 0.19               | 0.66                   | 0.23                 | 90.03                 | <i>Pelagibacter</i>            | SAR11-clade                    | <i>Rickettsiales</i>           | <i>Alphaproteobacteria</i>     | <i>Proteobacteria</i> | <i>Bacteria</i> |
