# Supplementary material for: Small Changes in pH Have Direct Effects on Marine Bacterial Community Composition: A Microcosm Approach
Source: PubMed Central journal article supplement (PMC3469576; doi:10.1371/journal.pone.0047035), 2012-10-11
Supplement: pone.0047035.s009.pdf [file pone.0047035.s009.pdf]

**Table S5. Results of the SIMPER analysis giving the dissimilarities between the pH levels *in situ* and 7.67 of ‘season’-‘dilution’ combinations significantly influenced by ‘pH’ according to PERMANOVA.**

Displayed are the OTUs (16S ribosomal amplicon pyrosequencing) that predominantly contributed to 90% of to the total dissimilarity.  $Av.A_i$ : average abundance of the *i* th species over all samples of the treatment (no: ‘no dilution’, serial: ‘serial dilution’, initial: ‘initial dilution’),  $Av.\delta_i$ : average contribution of the *i* th species to the total dissimilarity,  $Av.\delta_i/SD$ : the average value of the *i* th species as a discriminating species,  $Av.\delta_i\%$ : average percentage contribution of the *i* th species to the total dissimilarity,  $\sum Av.\delta_i\%$ : average cumulative contribution to the total dissimilarity.

| OTU                                                 | $Av.A_i$<br>(pH <i>in situ</i> ) | $Av.A_i$<br>(pH 7.67) | $Av.\delta_i$ | $Av.\delta_i/SD$ | $Av.\delta_i\%$ | $\sum Av.\delta_i\%$ | Genus                               | Family                              | Order                               | Class                         | Phylum                 | Domain          |
|-----------------------------------------------------|----------------------------------|-----------------------|---------------|------------------|-----------------|----------------------|-------------------------------------|-------------------------------------|-------------------------------------|-------------------------------|------------------------|-----------------|
| Spring 'no dilution' (average dissimilarity: 57.3%) |                                  |                       |               |                  |                 |                      |                                     |                                     |                                     |                               |                        |                 |
| Otu0005                                             | 9.45                             | 4.62                  | 1.95          | 1.85             | 3.4             | 3.4                  | <i>Pelagibacter</i>                 | SAR11-clade                         | <i>Rickettsiales</i>                | <i>Alphaproteobacteria</i>    | <i>Proteobacteria</i>  | <i>Bacteria</i> |
| Otu0029                                             | 5.69                             | 1.39                  | 1.6           | 2.13             | 2.79            | 6.19                 | unclass. <i>Bacteroidetes</i>       | unclass. <i>Bacteroidetes</i>       | unclass. <i>Bacteroidetes</i>       | unclass. <i>Bacteroidetes</i> | <i>Bacteroidetes</i>   | <i>Bacteria</i> |
| Otu0008                                             | 5.12                             | 0.98                  | 1.53          | 2.41             | 2.67            | 8.86                 | unclass. <i>Gammaproteobacteria</i> | unclass. <i>Gammaproteobacteria</i> | unclass. <i>Gammaproteobacteria</i> | <i>Gammaproteobacteria</i>    | <i>Proteobacteria</i>  | <i>Bacteria</i> |
| Otu0018                                             | 1.91                             | 5.96                  | 1.48          | 4.11             | 2.59            | 11.45                | unclass. <i>Puniceicoccaceae</i>    | <i>Puniceicoccaceae</i>             | <i>Puniceococcales</i>              | <i>Opiritae</i>               | <i>Verrucomicrobia</i> | <i>Bacteria</i> |
| Otu0001                                             | 6.06                             | 4.13                  | 1.33          | 1.95             | 2.32            | 13.76                | unclass. <i>Flavobacteriaceae</i>   | <i>Flavobacteriaceae</i>            | <i>Flavobacteriales</i>             | <i>Flavobacteria</i>          | <i>Bacteroidetes</i>   | <i>Bacteria</i> |
| Otu0056                                             | 1.59                             | 4.87                  | 1.2           | 4.97             | 2.09            | 15.85                | unclass. <i>Gammaproteobacteria</i> | unclass. <i>Gammaproteobacteria</i> | unclass. <i>Gammaproteobacteria</i> | <i>Gammaproteobacteria</i>    | <i>Proteobacteria</i>  | <i>Bacteria</i> |
| Otu0012                                             | 4.52                             | 1.48                  | 1.16          | 1.9              | 2.02            | 17.87                | unclass. <i>Comamonadaceae</i>      | <i>Comamonadaceae</i>               | <i>Burkholderiales</i>              | <i>Betaproteobacteria</i>     | <i>Proteobacteria</i>  | <i>Bacteria</i> |
| Otu0010                                             | 3.32                             | 5.77                  | 1.12          | 1.41             | 1.95            | 19.83                | unclass. <i>Flavobacteriaceae</i>   | <i>Flavobacteriaceae</i>            | <i>Flavobacteriales</i>             | <i>Flavobacteria</i>          | <i>Bacteroidetes</i>   | <i>Bacteria</i> |
| Otu0013                                             | 2.74                             | 5.62                  | 1.06          | 2.51             | 1.85            | 21.68                | unclass. <i>Flavobacteriaceae</i>   | <i>Flavobacteriaceae</i>            | <i>Flavobacteriales</i>             | <i>Flavobacteria</i>          | <i>Bacteroidetes</i>   | <i>Bacteria</i> |
| Otu0002                                             | 6.43                             | 7.01                  | 1.05          | 1.5              | 1.82            | 23.5                 | unclass. <i>Flavobacteriaceae</i>   | <i>Flavobacteriaceae</i>            | <i>Flavobacteriales</i>             | <i>Flavobacteria</i>          | <i>Bacteroidetes</i>   | <i>Bacteria</i> |
| Otu0022                                             | 5.16                             | 2.41                  | 1             | 2.36             | 1.74            | 25.24                | unclass. <i>Betaproteobacteria</i>  | unclass. <i>Betaproteobacteria</i>  | unclass. <i>Betaproteobacteria</i>  | <i>Betaproteobacteria</i>     | <i>Proteobacteria</i>  | <i>Bacteria</i> |
| Otu0025                                             | 0.2                              | 2.74                  | 0.96          | 1.73             | 1.67            | 26.91                | <i>Polaribacter</i>                 | <i>Flavobacteriaceae</i>            | <i>Flavobacteriales</i>             | <i>Flavobacteria</i>          | <i>Bacteroidetes</i>   | <i>Bacteria</i> |

| OTU     | Av.A <sub>i</sub><br>(pH <i>in situ</i> ) | Av.A <sub>i</sub><br>(pH 7.67) | Av.δ <sub>i</sub> | Av.δ <sub>i</sub> /SD | Av.δ <sub>i</sub> % | ΣAv.δ <sub>i</sub> % | Genus                               | Family                              | Order                               | Class                         | Phylum                | Domain          |
|---------|-------------------------------------------|--------------------------------|-------------------|-----------------------|---------------------|----------------------|-------------------------------------|-------------------------------------|-------------------------------------|-------------------------------|-----------------------|-----------------|
| Otu0134 | 7.21                                      | 5.85                           | 0.82              | 1.57                  | 1.42                | 28.34                | unclass. <i>Gammaproteobacteria</i> | unclass. <i>Gammaproteobacteria</i> | unclass. <i>Gammaproteobacteria</i> | <i>Gammaproteobacteria</i>    | <i>Proteobacteria</i> | <i>Bacteria</i> |
| Otu0139 | 1.76                                      | 3.91                           | 0.78              | 1.76                  | 1.37                | 29.7                 | unclass. <i>Gammaproteobacteria</i> | unclass. <i>Gammaproteobacteria</i> | unclass. <i>Gammaproteobacteria</i> | <i>Gammaproteobacteria</i>    | <i>Proteobacteria</i> | <i>Bacteria</i> |
| Otu0014 | 3.76                                      | 3.88                           | 0.77              | 1.35                  | 1.34                | 31.04                | <i>Reinekea</i>                     | <i>Oceanospirillaceae</i>           | <i>Oceanospirillales</i>            | <i>Gammaproteobacteria</i>    | <i>Proteobacteria</i> | <i>Bacteria</i> |
| Otu0007 | 3.2                                       | 4.03                           | 0.69              | 1.1                   | 1.2                 | 32.24                | unclass. <i>Flavobacteriales</i>    | unclass. <i>Flavobacteriales</i>    | <i>Flavobacteriales</i>             | <i>Flavobacteria</i>          | <i>Bacteroidetes</i>  | <i>Bacteria</i> |
| Otu0019 | 0.48                                      | 2.32                           | 0.68              | 1.96                  | 1.18                | 33.42                | unclass. <i>Gammaproteobacteria</i> | unclass. <i>Gammaproteobacteria</i> | unclass. <i>Gammaproteobacteria</i> | <i>Gammaproteobacteria</i>    | <i>Proteobacteria</i> | <i>Bacteria</i> |
| Otu0062 | 0.2                                       | 1.93                           | 0.67              | 1.49                  | 1.17                | 34.59                | <i>Haliea</i>                       | <i>Alteromonadaceae</i>             | <i>Alteromonadales</i>              | <i>Gammaproteobacteria</i>    | <i>Proteobacteria</i> | <i>Bacteria</i> |
| Otu0143 | 0.28                                      | 2.11                           | 0.67              | 2.55                  | 1.16                | 35.76                | unclass. <i>Gammaproteobacteria</i> | unclass. <i>Gammaproteobacteria</i> | unclass. <i>Gammaproteobacteria</i> | <i>Gammaproteobacteria</i>    | <i>Proteobacteria</i> | <i>Bacteria</i> |
| Otu0232 | 0                                         | 1.66                           | 0.61              | 5.32                  | 1.06                | 36.82                | unclass. <i>Rhodobacteraceae</i>    | <i>Rhodobacteraceae</i>             | <i>Rhodobacterales</i>              | <i>Alphaproteobacteria</i>    | <i>Proteobacteria</i> | <i>Bacteria</i> |
| Otu0151 | 0.6                                       | 2.27                           | 0.6               | 2.42                  | 1.04                | 37.86                | <i>Rhodococcus</i>                  | <i>Nocardiaceae</i>                 | <i>Actinomycetales</i>              | <i>Actinobacteria</i>         | <i>Actinobacteria</i> | <i>Bacteria</i> |
| Otu0135 | 3.24                                      | 1.86                           | 0.56              | 1.43                  | 0.98                | 38.84                | unclass. <i>Gammaproteobacteria</i> | unclass. <i>Gammaproteobacteria</i> | unclass. <i>Gammaproteobacteria</i> | <i>Gammaproteobacteria</i>    | <i>Proteobacteria</i> | <i>Bacteria</i> |
| Otu0248 | 0.2                                       | 1.5                            | 0.56              | 0.78                  | 0.97                | 39.82                | unclass. <i>Flavobacteriaceae</i>   | <i>Flavobacteriaceae</i>            | <i>Flavobacteriales</i>             | <i>Flavobacteria</i>          | <i>Bacteroidetes</i>  | <i>Bacteria</i> |
| Otu0070 | 0                                         | 1.43                           | 0.51              | 4.38                  | 0.9                 | 40.71                | <i>Winogradskyella</i>              | <i>Flavobacteriaceae</i>            | <i>Flavobacteriales</i>             | <i>Flavobacteria</i>          | <i>Bacteroidetes</i>  | <i>Bacteria</i> |
| Otu0015 | 1.5                                       | 0.2                            | 0.5               | 1.62                  | 0.88                | 41.59                | <i>Polaribacter</i>                 | <i>Flavobacteriaceae</i>            | <i>Flavobacteriales</i>             | <i>Flavobacteria</i>          | <i>Bacteroidetes</i>  | <i>Bacteria</i> |
| Otu0144 | 0.2                                       | 1.49                           | 0.48              | 2.13                  | 0.83                | 42.42                | <i>Lewinella</i>                    | <i>Saprospiraceae</i>               | <i>Sphingobacteriales</i>           | <i>Sphingobacteria</i>        | <i>Bacteroidetes</i>  | <i>Bacteria</i> |
| Otu0041 | 1.76                                      | 2.71                           | 0.47              | 1.31                  | 0.81                | 43.23                | <i>Sulfitobacter</i>                | <i>Rhodobacteraceae</i>             | <i>Rhodobacterales</i>              | <i>Alphaproteobacteria</i>    | <i>Proteobacteria</i> | <i>Bacteria</i> |
| Otu0020 | 1.78                                      | 2.15                           | 0.46              | 1.3                   | 0.81                | 44.04                | unclass. <i>Flammeovirgaceae</i>    | <i>Flammeovirgaceae</i>             | <i>Sphingobacteriales</i>           | <i>Sphingobacteria</i>        | <i>Bacteroidetes</i>  | <i>Bacteria</i> |
| Otu0006 | 0.88                                      | 1.36                           | 0.46              | 1.56                  | 0.8                 | 44.83                | <i>Polaribacter</i>                 | <i>Flavobacteriaceae</i>            | <i>Flavobacteriales</i>             | <i>Flavobacteria</i>          | <i>Bacteroidetes</i>  | <i>Bacteria</i> |
| Otu0055 | 1.08                                      | 2.31                           | 0.45              | 1.73                  | 0.78                | 45.62                | <i>Colwellia</i>                    | <i>Colwelliaceae</i>                | <i>Alteromonadales</i>              | <i>Gammaproteobacteria</i>    | <i>Proteobacteria</i> | <i>Bacteria</i> |
| Otu0092 | 0.2                                       | 1.31                           | 0.43              | 1.8                   | 0.75                | 46.37                | unclass. <i>Bacteroidetes</i>       | unclass. <i>Bacteroidetes</i>       | unclass. <i>Bacteroidetes</i>       | unclass. <i>Bacteroidetes</i> | <i>Bacteroidetes</i>  | <i>Bacteria</i> |
| Otu0017 | 1                                         | 0.8                            | 0.42              | 1.25                  | 0.73                | 47.1                 | unclass. <i>Flavobacteriales</i>    | unclass. <i>Flavobacteriales</i>    | <i>Flavobacteriales</i>             | <i>Flavobacteria</i>          | <i>Bacteroidetes</i>  | <i>Bacteria</i> |
| Otu0027 | 1.37                                      | 0.48                           | 0.41              | 1.35                  | 0.71                | 47.81                | <i>Pseudoalteromonas</i>            | <i>Pseudoalteromonadaceae</i>       | <i>Alteromonadales</i>              | <i>Gammaproteobacteria</i>    | <i>Proteobacteria</i> | <i>Bacteria</i> |
| Otu0052 | 1.49                                      | 0.4                            | 0.4               | 1.38                  | 0.7                 | 48.51                | unclass. <i>Betaproteobacteria</i>  | unclass. <i>Betaproteobacteria</i>  | unclass. <i>Betaproteobacteria</i>  | <i>Betaproteobacteria</i>     | <i>Proteobacteria</i> | <i>Bacteria</i> |
| Otu0037 | 0                                         | 1.08                           | 0.4               | 4.18                  | 0.7                 | 49.21                | <i>Marinobacter</i>                 | <i>Alteromonadaceae</i>             | <i>Alteromonadales</i>              | <i>Gammaproteobacteria</i>    | <i>Proteobacteria</i> | <i>Bacteria</i> |
| Otu0148 | 0                                         | 1.08                           | 0.39              | 1.64                  | 0.68                | 49.89                | unclass. <i>Sphingobacteriales</i>  | unclass. <i>Sphingobacteriales</i>  | <i>Sphingobacteriales</i>           | <i>Sphingobacteria</i>        | <i>Bacteroidetes</i>  | <i>Bacteria</i> |
| Otu0160 | 0.57                                      | 1.34                           | 0.38              | 1.45                  | 0.66                | 50.55                | <i>Colwellia</i>                    | <i>Colwelliaceae</i>                | <i>Alteromonadales</i>              | <i>Gammaproteobacteria</i>    | <i>Proteobacteria</i> | <i>Bacteria</i> |
| Otu0145 | 0.2                                       | 1.17                           | 0.37              | 1.61                  | 0.64                | 51.19                | unclass. <i>Gammaproteobacteria</i> | unclass. <i>Gammaproteobacteria</i> | unclass. <i>Gammaproteobacteria</i> | <i>Gammaproteobacteria</i>    | <i>Proteobacteria</i> | <i>Bacteria</i> |
| Otu0035 | 0.97                                      | 1.91                           | 0.36              | 1.39                  | 0.63                | 51.83                | <i>Colwellia</i>                    | <i>Colwelliaceae</i>                | <i>Alteromonadales</i>              | <i>Gammaproteobacteria</i>    | <i>Proteobacteria</i> | <i>Bacteria</i> |

| OTU     | Av.A <sub>i</sub><br>(pH <i>in situ</i> ) | Av.A <sub>i</sub><br>(pH 7.67) | Av.δ <sub>i</sub> | Av.δ <sub>i</sub> /SD | Av.δ <sub>i</sub> % | ΣAv.δ <sub>i</sub> % | Genus                               | Family                              | Order                               | Class                          | Phylum                   | Domain          |
|---------|-------------------------------------------|--------------------------------|-------------------|-----------------------|---------------------|----------------------|-------------------------------------|-------------------------------------|-------------------------------------|--------------------------------|--------------------------|-----------------|
| Otu0213 | 0                                         | 0.97                           | 0.36              | 1.78                  | 0.62                | 52.44                | unclass. <i>Gammaproteobacteria</i> | unclass. <i>Gammaproteobacteria</i> | unclass. <i>Gammaproteobacteria</i> | <i>Gammaproteobacteria</i>     | <i>Proteobacteria</i>    | <i>Bacteria</i> |
| Otu0150 | 0                                         | 0.97                           | 0.35              | 1.85                  | 0.61                | 53.06                | unclass. <i>Bacteria</i>            | unclass. <i>Bacteria</i>            | unclass. <i>Bacteria</i>            | unclass. <i>Bacteria</i>       | unclass. <i>Bacteria</i> | <i>Bacteria</i> |
| Otu0169 | 0.2                                       | 1.17                           | 0.35              | 2.1                   | 0.61                | 53.67                | unclass. <i>Bacteria</i>            | unclass. <i>Bacteria</i>            | unclass. <i>Bacteria</i>            | unclass. <i>Bacteria</i>       | unclass. <i>Bacteria</i> | <i>Bacteria</i> |
| Otu0069 | 0                                         | 0.97                           | 0.34              | 0.98                  | 0.6                 | 54.27                | unclass. <i>Bacteria</i>            | unclass. <i>Bacteria</i>            | unclass. <i>Bacteria</i>            | unclass. <i>Bacteria</i>       | unclass. <i>Bacteria</i> | <i>Bacteria</i> |
| Otu0237 | 0                                         | 0.95                           | 0.33              | 1.76                  | 0.58                | 54.85                | unclass. <i>Flavobacteriaceae</i>   | <i>Flavobacteriaceae</i>            | <i>Flavobacteriales</i>             | <i>Flavobacteria</i>           | <i>Bacteroidetes</i>     | <i>Bacteria</i> |
| Otu0136 | 0.68                                      | 0.8                            | 0.32              | 1.19                  | 0.57                | 55.42                | unclass. <i>Bacteroidetes</i>       | unclass. <i>Bacteroidetes</i>       | unclass. <i>Bacteroidetes</i>       | unclass. <i>Bacteroidetes</i>  | <i>Bacteroidetes</i>     | <i>Bacteria</i> |
| Otu0177 | 0.2                                       | 0.83                           | 0.3               | 1.13                  | 0.53                | 55.94                | <i>Haliea</i>                       | <i>Alteromonadaceae</i>             | <i>Alteromonadales</i>              | <i>Gammaproteobacteria</i>     | <i>Proteobacteria</i>    | <i>Bacteria</i> |
| Otu0119 | 0.2                                       | 0.95                           | 0.3               | 1.45                  | 0.52                | 56.46                | <i>Colwellia</i>                    | <i>Colwelliaceae</i>                | <i>Alteromonadales</i>              | <i>Gammaproteobacteria</i>     | <i>Proteobacteria</i>    | <i>Bacteria</i> |
| Otu0146 | 0.2                                       | 0.95                           | 0.3               | 1.38                  | 0.51                | 56.98                | <i>Reichenbachiella</i>             | <i>Flammeovirgaceae</i>             | <i>Sphingobacteriales</i>           | <i>Sphingobacteria</i>         | <i>Bacteroidetes</i>     | <i>Bacteria</i> |
| Otu0149 | 0                                         | 0.77                           | 0.29              | 1.16                  | 0.51                | 57.49                | unclass. <i>Gammaproteobacteria</i> | unclass. <i>Gammaproteobacteria</i> | unclass. <i>Gammaproteobacteria</i> | <i>Gammaproteobacteria</i>     | <i>Proteobacteria</i>    | <i>Bacteria</i> |
| Otu0138 | 0                                         | 0.84                           | 0.29              | 0.79                  | 0.51                | 58                   | unclass. <i>Flavobacteriaceae</i>   | <i>Flavobacteriaceae</i>            | <i>Flavobacteriales</i>             | <i>Flavobacteria</i>           | <i>Bacteroidetes</i>     | <i>Bacteria</i> |
| Otu0057 | 0                                         | 0.83                           | 0.29              | 1.14                  | 0.51                | 58.5                 | <i>Ulvibacter</i>                   | <i>Flavobacteriaceae</i>            | <i>Flavobacteriales</i>             | <i>Flavobacteria</i>           | <i>Bacteroidetes</i>     | <i>Bacteria</i> |
| Otu0140 | 0                                         | 0.83                           | 0.29              | 1.16                  | 0.5                 | 59.01                | <i>Oleispira</i>                    | <i>Oceanospirillaceae</i>           | <i>Oceanospirillales</i>            | <i>Gammaproteobacteria</i>     | <i>Proteobacteria</i>    | <i>Bacteria</i> |
| Otu0293 | 0.2                                       | 0.83                           | 0.29              | 1.15                  | 0.5                 | 59.51                | <i>Moritella</i>                    | <i>Moritellaceae</i>                | <i>Alteromonadales</i>              | <i>Gammaproteobacteria</i>     | <i>Proteobacteria</i>    | <i>Bacteria</i> |
| Otu0155 | 0                                         | 0.8                            | 0.29              | 1.1                   | 0.5                 | 60.01                | unclass. <i>Flavobacteriaceae</i>   | <i>Flavobacteriaceae</i>            | <i>Flavobacteriales</i>             | <i>Flavobacteria</i>           | <i>Bacteroidetes</i>     | <i>Bacteria</i> |
| Otu0009 | 0.63                                      | 0.77                           | 0.29              | 1.2                   | 0.5                 | 60.51                | unclass. <i>Rhodobacteraceae</i>    | <i>Rhodobacteraceae</i>             | <i>Rhodobacterales</i>              | <i>Alphaproteobacteria</i>     | <i>Proteobacteria</i>    | <i>Bacteria</i> |
| Otu0187 | 0                                         | 0.8                            | 0.28              | 1.95                  | 0.49                | 61                   | <i>Lentisphaera</i>                 | <i>Lentisphaeraceae</i>             | <i>Lentisphaerales</i>              | <i>Lentisphaeria</i>           | <i>Lentisphaerae</i>     | <i>Bacteria</i> |
| Otu0083 | 0                                         | 0.77                           | 0.28              | 1.13                  | 0.49                | 61.49                | unclass. <i>Rhodobacteraceae</i>    | <i>Rhodobacteraceae</i>             | <i>Rhodobacterales</i>              | <i>Alphaproteobacteria</i>     | <i>Proteobacteria</i>    | <i>Bacteria</i> |
| Otu0174 | 0.2                                       | 0.88                           | 0.28              | 1.46                  | 0.48                | 61.98                | unclass. <i>Flavobacteriaceae</i>   | <i>Flavobacteriaceae</i>            | <i>Flavobacteriales</i>             | <i>Flavobacteria</i>           | <i>Bacteroidetes</i>     | <i>Bacteria</i> |
| Otu0046 | 0.28                                      | 0.75                           | 0.27              | 1.15                  | 0.47                | 62.45                | unclass. <i>Flavobacteriaceae</i>   | <i>Flavobacteriaceae</i>            | <i>Flavobacteriales</i>             | <i>Flavobacteria</i>           | <i>Bacteroidetes</i>     | <i>Bacteria</i> |
| Otu0036 | 0.75                                      | 0                              | 0.27              | 1.09                  | 0.47                | 62.92                | <i>Glaciecola</i>                   | <i>Alteromonadaceae</i>             | <i>Alteromonadales</i>              | <i>Gammaproteobacteria</i>     | <i>Proteobacteria</i>    | <i>Bacteria</i> |
| Otu0122 | 0                                         | 0.75                           | 0.27              | 1.09                  | 0.46                | 63.39                | <i>Glaciecola</i>                   | <i>Alteromonadaceae</i>             | <i>Alteromonadales</i>              | <i>Gammaproteobacteria</i>     | <i>Proteobacteria</i>    | <i>Bacteria</i> |
| Otu0164 | 0.4                                       | 0.83                           | 0.27              | 1.23                  | 0.46                | 63.85                | <i>Croceibacter</i>                 | <i>Flavobacteriaceae</i>            | <i>Flavobacteriales</i>             | <i>Flavobacteria</i>           | <i>Bacteroidetes</i>     | <i>Bacteria</i> |
| Otu0080 | 0.28                                      | 0.63                           | 0.25              | 0.89                  | 0.44                | 64.29                | <i>Polaribacter</i>                 | <i>Flavobacteriaceae</i>            | <i>Flavobacteriales</i>             | <i>Flavobacteria</i>           | <i>Bacteroidetes</i>     | <i>Bacteria</i> |
| Otu0158 | 0.2                                       | 0.75                           | 0.25              | 1.11                  | 0.44                | 64.74                | unclass. <i>Proteobacteria</i>      | unclass. <i>Proteobacteria</i>      | unclass. <i>Proteobacteria</i>      | unclass. <i>Proteobacteria</i> | <i>Proteobacteria</i>    | <i>Bacteria</i> |
| Otu0042 | 0.4                                       | 0.95                           | 0.25              | 1.21                  | 0.44                | 65.17                | <i>Rhodococcus</i>                  | <i>Nocardiaceae</i>                 | <i>Actinomycetales</i>              | <i>Actinobacteria</i>          | <i>Actinobacteria</i>    | <i>Bacteria</i> |
| Otu0163 | 0.2                                       | 0.75                           | 0.25              | 1.09                  | 0.44                | 65.61                | unclass. <i>Gammaproteobacteria</i> | unclass. <i>Gammaproteobacteria</i> | unclass. <i>Gammaproteobacteria</i> | <i>Gammaproteobacteria</i>     | <i>Proteobacteria</i>    | <i>Bacteria</i> |

| OTU     | Av.A <sub>i</sub><br>(pH <i>in situ</i> ) | Av.A <sub>i</sub><br>(pH 7.67) | Av.δ <sub>i</sub> | Av.δ <sub>i</sub> /SD | Av.δ <sub>i</sub> % | ΣAv.δ <sub>i</sub> % | Genus                               | Family                              | Order                               | Class                          | Phylum                   | Domain          |
|---------|-------------------------------------------|--------------------------------|-------------------|-----------------------|---------------------|----------------------|-------------------------------------|-------------------------------------|-------------------------------------|--------------------------------|--------------------------|-----------------|
| Otu0157 | 0.4                                       | 0.77                           | 0.25              | 1.19                  | 0.44                | 66.05                | unclass. <i>Gammaproteobacteria</i> | unclass. <i>Gammaproteobacteria</i> | unclass. <i>Gammaproteobacteria</i> | <i>Gammaproteobacteria</i>     | <i>Proteobacteria</i>    | <i>Bacteria</i> |
| Otu0391 | 0                                         | 0.68                           | 0.24              | 1.15                  | 0.42                | 66.47                | unclass. <i>Gammaproteobacteria</i> | unclass. <i>Gammaproteobacteria</i> | unclass. <i>Gammaproteobacteria</i> | <i>Gammaproteobacteria</i>     | <i>Proteobacteria</i>    | <i>Bacteria</i> |
| Otu0257 | 0                                         | 0.68                           | 0.24              | 1.14                  | 0.41                | 66.88                | <i>Salinisphaera</i>                | <i>Salinisphaeraceae</i>            | <i>Salinisphaerales</i>             | <i>Gammaproteobacteria</i>     | <i>Proteobacteria</i>    | <i>Bacteria</i> |
| Otu0229 | 0.2                                       | 0.68                           | 0.23              | 1.14                  | 0.41                | 67.29                | unclass. <i>Saprospiraceae</i>      | <i>Saprospiraceae</i>               | <i>Sphingobacteriales</i>           | <i>Sphingobacteria</i>         | <i>Bacteroidetes</i>     | <i>Bacteria</i> |
| Otu0199 | 0                                         | 0.6                            | 0.22              | 1.19                  | 0.38                | 67.68                | unclass. <i>Flavobacteriaceae</i>   | <i>Flavobacteriaceae</i>            | <i>Flavobacteriales</i>             | <i>Flavobacteria</i>           | <i>Bacteroidetes</i>     | <i>Bacteria</i> |
| Otu0044 | 1.63                                      | 1.81                           | 0.22              | 1.4                   | 0.38                | 68.05                | unclass. <i>Gammaproteobacteria</i> | unclass. <i>Gammaproteobacteria</i> | unclass. <i>Gammaproteobacteria</i> | <i>Gammaproteobacteria</i>     | <i>Proteobacteria</i>    | <i>Bacteria</i> |
| Otu0003 | 0.28                                      | 0.48                           | 0.21              | 0.86                  | 0.37                | 68.42                | unclass. <i>Rhodobacteraceae</i>    | <i>Rhodobacteraceae</i>             | <i>Rhodobacterales</i>              | <i>Alphaproteobacteria</i>     | <i>Proteobacteria</i>    | <i>Bacteria</i> |
| Otu0011 | 0.48                                      | 0.28                           | 0.21              | 0.89                  | 0.37                | 68.79                | unclass. <i>Flavobacteriaceae</i>   | <i>Flavobacteriaceae</i>            | <i>Flavobacteriales</i>             | <i>Flavobacteria</i>           | <i>Bacteroidetes</i>     | <i>Bacteria</i> |
| Otu0118 | 0.4                                       | 0.48                           | 0.21              | 1.01                  | 0.36                | 69.15                | <i>Colwellia</i>                    | <i>Colwelliaceae</i>                | <i>Alteromonadales</i>              | <i>Gammaproteobacteria</i>     | <i>Proteobacteria</i>    | <i>Bacteria</i> |
| Otu0137 | 0.28                                      | 0.48                           | 0.2               | 0.89                  | 0.35                | 69.5                 | unclass. <i>Bacteroidetes</i>       | unclass. <i>Bacteroidetes</i>       | unclass. <i>Bacteroidetes</i>       | unclass. <i>Bacteroidetes</i>  | <i>Bacteroidetes</i>     | <i>Bacteria</i> |
| Otu0051 | 0.4                                       | 0.48                           | 0.2               | 1.01                  | 0.35                | 69.86                | unclass. <i>Flavobacteriaceae</i>   | <i>Flavobacteriaceae</i>            | <i>Flavobacteriales</i>             | <i>Flavobacteria</i>           | <i>Bacteroidetes</i>     | <i>Bacteria</i> |
| Otu0032 | 0.55                                      | 0                              | 0.2               | 0.75                  | 0.35                | 70.2                 | unclass. <i>Gammaproteobacteria</i> | unclass. <i>Gammaproteobacteria</i> | unclass. <i>Gammaproteobacteria</i> | <i>Gammaproteobacteria</i>     | <i>Proteobacteria</i>    | <i>Bacteria</i> |
| Otu0265 | 0                                         | 0.55                           | 0.19              | 0.76                  | 0.34                | 70.54                | unclass. <i>Bacteria</i>            | unclass. <i>Bacteria</i>            | unclass. <i>Bacteria</i>            | unclass. <i>Bacteria</i>       | unclass. <i>Bacteria</i> | <i>Bacteria</i> |
| Otu0113 | 0.6                                       | 0.4                            | 0.19              | 1.01                  | 0.33                | 70.87                | <i>Colwellia</i>                    | <i>Colwelliaceae</i>                | <i>Alteromonadales</i>              | <i>Gammaproteobacteria</i>     | <i>Proteobacteria</i>    | <i>Bacteria</i> |
| Otu0251 | 0                                         | 0.55                           | 0.19              | 0.77                  | 0.33                | 71.2                 | unclass. <i>Bacteroidetes</i>       | unclass. <i>Bacteroidetes</i>       | unclass. <i>Bacteroidetes</i>       | unclass. <i>Bacteroidetes</i>  | <i>Bacteroidetes</i>     | <i>Bacteria</i> |
| Otu0023 | 0                                         | 0.48                           | 0.19              | 0.76                  | 0.33                | 71.53                | unclass. <i>Verrucomicrobiales</i>  | unclass. <i>Verrucomicrobiales</i>  | <i>Verrucomicrobiales</i>           | <i>Verrucomicrobiae</i>        | <i>Verrucomicrobia</i>   | <i>Bacteria</i> |
| Otu0413 | 0                                         | 0.55                           | 0.18              | 0.76                  | 0.32                | 71.85                | <i>Eudoraea</i>                     | <i>Flavobacteriaceae</i>            | <i>Flavobacteriales</i>             | <i>Flavobacteria</i>           | <i>Bacteroidetes</i>     | <i>Bacteria</i> |
| Otu0175 | 0.6                                       | 0.6                            | 0.18              | 0.94                  | 0.31                | 72.16                | unclass. <i>Flavobacteriaceae</i>   | <i>Flavobacteriaceae</i>            | <i>Flavobacteriales</i>             | <i>Flavobacteria</i>           | <i>Bacteroidetes</i>     | <i>Bacteria</i> |
| Otu0202 | 0                                         | 0.48                           | 0.18              | 0.77                  | 0.31                | 72.47                | unclass. <i>Alteromonadaceae</i>    | <i>Alteromonadaceae</i>             | <i>Alteromonadales</i>              | <i>Gammaproteobacteria</i>     | <i>Proteobacteria</i>    | <i>Bacteria</i> |
| Otu0068 | 0.48                                      | 0                              | 0.17              | 0.78                  | 0.3                 | 72.77                | <i>Pelagibacter</i>                 | SAR11-clade                         | <i>Rickettsiales</i>                | <i>Alphaproteobacteria</i>     | <i>Proteobacteria</i>    | <i>Bacteria</i> |
| Otu0171 | 0                                         | 0.48                           | 0.17              | 0.78                  | 0.3                 | 73.07                | unclass. <i>Gammaproteobacteria</i> | unclass. <i>Gammaproteobacteria</i> | unclass. <i>Gammaproteobacteria</i> | <i>Gammaproteobacteria</i>     | <i>Proteobacteria</i>    | <i>Bacteria</i> |
| Otu0093 | 0                                         | 0.48                           | 0.17              | 0.79                  | 0.29                | 73.35                | <i>Aestuariicola</i>                | <i>Flavobacteriaceae</i>            | <i>Flavobacteriales</i>             | <i>Flavobacteria</i>           | <i>Bacteroidetes</i>     | <i>Bacteria</i> |
| Otu0173 | 0                                         | 0.48                           | 0.17              | 0.79                  | 0.29                | 73.64                | unclass. <i>Alteromonadaceae</i>    | <i>Alteromonadaceae</i>             | <i>Alteromonadales</i>              | <i>Gammaproteobacteria</i>     | <i>Proteobacteria</i>    | <i>Bacteria</i> |
| Otu0389 | 0                                         | 0.48                           | 0.16              | 0.78                  | 0.29                | 73.93                | unclass. <i>Flavobacteriaceae</i>   | <i>Flavobacteriaceae</i>            | <i>Flavobacteriales</i>             | <i>Flavobacteria</i>           | <i>Bacteroidetes</i>     | <i>Bacteria</i> |
| Otu0191 | 0.2                                       | 0.4                            | 0.16              | 0.86                  | 0.29                | 74.22                | unclass. <i>Proteobacteria</i>      | unclass. <i>Proteobacteria</i>      | unclass. <i>Proteobacteria</i>      | unclass. <i>Proteobacteria</i> | <i>Proteobacteria</i>    | <i>Bacteria</i> |
| Otu0200 | 0                                         | 0.48                           | 0.16              | 0.79                  | 0.28                | 74.5                 | unclass. <i>Saprospiraceae</i>      | <i>Saprospiraceae</i>               | <i>Sphingobacteriales</i>           | <i>Sphingobacteria</i>         | <i>Bacteroidetes</i>     | <i>Bacteria</i> |
| Otu0159 | 0.4                                       | 0.2                            | 0.16              | 0.86                  | 0.28                | 74.78                | unclass. <i>Saprospiraceae</i>      | <i>Saprospiraceae</i>               | <i>Sphingobacteriales</i>           | <i>Sphingobacteria</i>         | <i>Bacteroidetes</i>     | <i>Bacteria</i> |

| OTU     | Av.A <sub>i</sub><br>(pH <i>in situ</i> ) | Av.A <sub>i</sub><br>(pH 7.67) | Av.δ <sub>i</sub> | Av.δ <sub>i</sub> /SD | Av.δ <sub>i</sub> % | ΣAv.δ <sub>i</sub> % | Genus                               | Family                                     | Order                               | Class                          | Phylum                   | Domain          |
|---------|-------------------------------------------|--------------------------------|-------------------|-----------------------|---------------------|----------------------|-------------------------------------|--------------------------------------------|-------------------------------------|--------------------------------|--------------------------|-----------------|
| Otu0290 | 0.28                                      | 0.28                           | 0.16              | 0.67                  | 0.28                | 75.07                | unclass. <i>Flavobacteriaceae</i>   | <i>Flavobacteriaceae</i>                   | <i>Flavobacteriales</i>             | <i>Flavobacteria</i>           | <i>Bacteroidetes</i>     | <i>Bacteria</i> |
| Otu0034 | 0                                         | 0.49                           | 0.16              | 0.49                  | 0.28                | 75.35                | unclass. <i>Bacteria</i>            | unclass. <i>Bacteria</i>                   | unclass. <i>Bacteria</i>            | unclass. <i>Bacteria</i>       | unclass. <i>Bacteria</i> | <i>Bacteria</i> |
| Otu0141 | 0.4                                       | 0.2                            | 0.16              | 0.86                  | 0.28                | 75.63                | unclass. <i>Bacteroidetes</i>       | unclass. <i>Bacteroidetes</i>              | unclass. <i>Bacteroidetes</i>       | unclass. <i>Bacteroidetes</i>  | <i>Bacteroidetes</i>     | <i>Bacteria</i> |
| Otu0192 | 0.2                                       | 0.4                            | 0.16              | 0.86                  | 0.27                | 75.9                 | unclass. <i>Gammaproteobacteria</i> | unclass. <i>Gammaproteobacteria</i>        | unclass. <i>Gammaproteobacteria</i> | <i>Gammaproteobacteria</i>     | <i>Proteobacteria</i>    | <i>Bacteria</i> |
| Otu0409 | 0                                         | 0.45                           | 0.16              | 0.49                  | 0.27                | 76.17                | unclass. <i>Flavobacteriales</i>    | unclass. <i>Flavobacteriales</i>           | <i>Flavobacteriales</i>             | <i>Flavobacteria</i>           | <i>Bacteroidetes</i>     | <i>Bacteria</i> |
| Otu0254 | 0                                         | 0.4                            | 0.15              | 0.79                  | 0.27                | 76.44                | unclass. <i>Flavobacteriaceae</i>   | <i>Flavobacteriaceae</i>                   | <i>Flavobacteriales</i>             | <i>Flavobacteria</i>           | <i>Bacteroidetes</i>     | <i>Bacteria</i> |
| Otu0227 | 0.4                                       | 0                              | 0.15              | 0.8                   | 0.26                | 76.7                 | unclass. <i>Gammaproteobacteria</i> | unclass. <i>Gammaproteobacteria</i>        | unclass. <i>Gammaproteobacteria</i> | <i>Gammaproteobacteria</i>     | <i>Proteobacteria</i>    | <i>Bacteria</i> |
| Otu0133 | 0.4                                       | 0                              | 0.15              | 0.8                   | 0.26                | 76.95                | <i>Colwellia</i>                    | <i>Colwelliaceae</i>                       | <i>Alteromonadales</i>              | <i>Gammaproteobacteria</i>     | <i>Proteobacteria</i>    | <i>Bacteria</i> |
| Otu0167 | 0.28                                      | 0.2                            | 0.15              | 0.69                  | 0.26                | 77.21                | unclass. <i>Rhodobacteraceae</i>    | <i>Rhodobacteraceae</i>                    | <i>Rhodobacterales</i>              | <i>Alphaproteobacteria</i>     | <i>Proteobacteria</i>    | <i>Bacteria</i> |
| Otu0124 | 0                                         | 0.4                            | 0.15              | 0.8                   | 0.26                | 77.47                | <i>Loktanela</i>                    | <i>Rhodobacteraceae</i>                    | <i>Rhodobacterales</i>              | <i>Alphaproteobacteria</i>     | <i>Proteobacteria</i>    | <i>Bacteria</i> |
| Otu0196 | 0                                         | 0.4                            | 0.15              | 0.8                   | 0.26                | 77.73                | unclass. <i>Flavobacteriaceae</i>   | <i>Flavobacteriaceae</i>                   | <i>Flavobacteriales</i>             | <i>Flavobacteria</i>           | <i>Bacteroidetes</i>     | <i>Bacteria</i> |
| Otu0147 | 0.4                                       | 0                              | 0.15              | 0.8                   | 0.26                | 77.98                | <i>Dasania</i>                      | <i>Pseudomonadales_incertae_se<br/>dis</i> | <i>Pseudomonadales</i>              | <i>Gammaproteobacteria</i>     | <i>Proteobacteria</i>    | <i>Bacteria</i> |
| Otu0313 | 0                                         | 0.4                            | 0.14              | 0.8                   | 0.25                | 78.23                | unclass. <i>Gammaproteobacteria</i> | unclass. <i>Gammaproteobacteria</i>        | unclass. <i>Gammaproteobacteria</i> | <i>Gammaproteobacteria</i>     | <i>Proteobacteria</i>    | <i>Bacteria</i> |
| Otu0419 | 0                                         | 0.4                            | 0.14              | 0.8                   | 0.25                | 78.49                | unclass. <i>Bacteria</i>            | unclass. <i>Bacteria</i>                   | unclass. <i>Bacteria</i>            | unclass. <i>Bacteria</i>       | unclass. <i>Bacteria</i> | <i>Bacteria</i> |
| Otu0341 | 0                                         | 0.4                            | 0.14              | 0.8                   | 0.25                | 78.73                | unclass. <i>Gammaproteobacteria</i> | unclass. <i>Gammaproteobacteria</i>        | unclass. <i>Gammaproteobacteria</i> | <i>Gammaproteobacteria</i>     | <i>Proteobacteria</i>    | <i>Bacteria</i> |
| Otu0355 | 0                                         | 0.4                            | 0.14              | 0.8                   | 0.25                | 78.98                | unclass. <i>Sphingobacteriales</i>  | unclass. <i>Sphingobacteriales</i>         | <i>Sphingobacteriales</i>           | <i>Sphingobacteria</i>         | <i>Bacteroidetes</i>     | <i>Bacteria</i> |
| Otu0363 | 0                                         | 0.4                            | 0.14              | 0.8                   | 0.25                | 79.23                | unclass. <i>Flavobacteriaceae</i>   | <i>Flavobacteriaceae</i>                   | <i>Flavobacteriales</i>             | <i>Flavobacteria</i>           | <i>Bacteroidetes</i>     | <i>Bacteria</i> |
| Otu0162 | 0                                         | 0.4                            | 0.14              | 0.8                   | 0.24                | 79.47                | <i>Marinoscillum</i>                | <i>Flammeovirgaceae</i>                    | <i>Sphingobacteriales</i>           | <i>Sphingobacteria</i>         | <i>Bacteroidetes</i>     | <i>Bacteria</i> |
| Otu0394 | 0                                         | 0.4                            | 0.14              | 0.8                   | 0.24                | 79.71                | unclass. <i>Bacteria</i>            | unclass. <i>Bacteria</i>                   | unclass. <i>Bacteria</i>            | unclass. <i>Bacteria</i>       | unclass. <i>Bacteria</i> | <i>Bacteria</i> |
| Otu0392 | 0                                         | 0.4                            | 0.14              | 0.8                   | 0.24                | 79.95                | unclass. <i>Bacteria</i>            | unclass. <i>Bacteria</i>                   | unclass. <i>Bacteria</i>            | unclass. <i>Bacteria</i>       | unclass. <i>Bacteria</i> | <i>Bacteria</i> |
| Otu0249 | 0.2                                       | 0.2                            | 0.12              | 0.67                  | 0.21                | 80.16                | unclass. <i>Bacteria</i>            | unclass. <i>Bacteria</i>                   | unclass. <i>Bacteria</i>            | unclass. <i>Bacteria</i>       | unclass. <i>Bacteria</i> | <i>Bacteria</i> |
| Otu0256 | 0.2                                       | 0.2                            | 0.12              | 0.67                  | 0.2                 | 80.36                | <i>Glaciecola</i>                   | <i>Alteromonadaceae</i>                    | <i>Alteromonadales</i>              | <i>Gammaproteobacteria</i>     | <i>Proteobacteria</i>    | <i>Bacteria</i> |
| Otu0245 | 0.2                                       | 0.2                            | 0.12              | 0.67                  | 0.2                 | 80.57                | unclass. <i>Flavobacteriales</i>    | unclass. <i>Flavobacteriales</i>           | <i>Flavobacteriales</i>             | <i>Flavobacteria</i>           | <i>Bacteroidetes</i>     | <i>Bacteria</i> |
| Otu0271 | 0.2                                       | 0.2                            | 0.12              | 0.67                  | 0.2                 | 80.77                | unclass. <i>Proteobacteria</i>      | unclass. <i>Proteobacteria</i>             | unclass. <i>Proteobacteria</i>      | unclass. <i>Proteobacteria</i> | <i>Proteobacteria</i>    | <i>Bacteria</i> |
| Otu0049 | 0                                         | 0.28                           | 0.12              | 0.49                  | 0.2                 | 80.97                | unclass. <i>Bacteria</i>            | unclass. <i>Bacteria</i>                   | unclass. <i>Bacteria</i>            | unclass. <i>Bacteria</i>       | unclass. <i>Bacteria</i> | <i>Bacteria</i> |
| Otu0170 | 0.2                                       | 0.2                            | 0.12              | 0.67                  | 0.2                 | 81.18                | unclass. <i>Bacteria</i>            | unclass. <i>Bacteria</i>                   | unclass. <i>Bacteria</i>            | unclass. <i>Bacteria</i>       | unclass. <i>Bacteria</i> | <i>Bacteria</i> |
| Otu0261 | 0.2                                       | 0.2                            | 0.12              | 0.67                  | 0.2                 | 81.38                | <i>Winogradskyella</i>              | <i>Flavobacteriaceae</i>                   | <i>Flavobacteriales</i>             | <i>Flavobacteria</i>           | <i>Bacteroidetes</i>     | <i>Bacteria</i> |

| OTU     | Av.A <sub>i</sub><br>(pH <i>in situ</i> ) | Av.A <sub>i</sub><br>(pH 7.67) | Av.δ <sub>i</sub> | Av.δ <sub>i</sub> /SD | Av.δ <sub>i</sub> % | ΣAv.δ <sub>i</sub> % | Genus                               | Family                              | Order                               | Class                          | Phylum                   | Domain          |
|---------|-------------------------------------------|--------------------------------|-------------------|-----------------------|---------------------|----------------------|-------------------------------------|-------------------------------------|-------------------------------------|--------------------------------|--------------------------|-----------------|
| Otu0222 | 0                                         | 0.35                           | 0.11              | 0.49                  | 0.2                 | 81.58                | <i>Haliea</i>                       | <i>Alteromonadaceae</i>             | <i>Alteromonadales</i>              | <i>Gammaproteobacteria</i>     | <i>Proteobacteria</i>    | <i>Bacteria</i> |
| Otu0252 | 0                                         | 0.35                           | 0.11              | 0.49                  | 0.2                 | 81.78                | <i>Croceibacter</i>                 | <i>Flavobacteriaceae</i>            | <i>Flavobacteriales</i>             | <i>Flavobacteria</i>           | <i>Bacteroidetes</i>     | <i>Bacteria</i> |
| Otu0427 | 0                                         | 0.35                           | 0.11              | 0.49                  | 0.2                 | 81.98                | unclass. <i>Flavobacteriaceae</i>   | <i>Flavobacteriaceae</i>            | <i>Flavobacteriales</i>             | <i>Flavobacteria</i>           | <i>Bacteroidetes</i>     | <i>Bacteria</i> |
| Otu0439 | 0                                         | 0.35                           | 0.11              | 0.49                  | 0.2                 | 82.18                | unclass. <i>Flavobacteriales</i>    | unclass. <i>Flavobacteriales</i>    | <i>Flavobacteriales</i>             | <i>Flavobacteria</i>           | <i>Bacteroidetes</i>     | <i>Bacteria</i> |
| Otu0264 | 0.2                                       | 0.2                            | 0.11              | 0.67                  | 0.2                 | 82.37                | <i>Balneola</i>                     | <i>Chitinophagaceae</i>             | <i>Sphingobacteriales</i>           | <i>Sphingobacteria</i>         | <i>Bacteroidetes</i>     | <i>Bacteria</i> |
| Otu0339 | 0.28                                      | 0                              | 0.11              | 0.49                  | 0.18                | 82.55                | unclass. <i>Proteobacteria</i>      | unclass. <i>Proteobacteria</i>      | unclass. <i>Proteobacteria</i>      | unclass. <i>Proteobacteria</i> | <i>Proteobacteria</i>    | <i>Bacteria</i> |
| Otu0016 | 0.28                                      | 0                              | 0.1               | 0.49                  | 0.17                | 82.73                | unclass. <i>Gammaproteobacteria</i> | unclass. <i>Gammaproteobacteria</i> | unclass. <i>Gammaproteobacteria</i> | <i>Gammaproteobacteria</i>     | <i>Proteobacteria</i>    | <i>Bacteria</i> |
| Otu0064 | 0                                         | 0.28                           | 0.1               | 0.49                  | 0.17                | 82.9                 | unclass. <i>Flavobacteriaceae</i>   | <i>Flavobacteriaceae</i>            | <i>Flavobacteriales</i>             | <i>Flavobacteria</i>           | <i>Bacteroidetes</i>     | <i>Bacteria</i> |
| Otu0306 | 0                                         | 0.28                           | 0.1               | 0.49                  | 0.17                | 83.07                | unclass. <i>Bacteria</i>            | unclass. <i>Bacteria</i>            | unclass. <i>Bacteria</i>            | unclass. <i>Bacteria</i>       | unclass. <i>Bacteria</i> | <i>Bacteria</i> |
| Otu0410 | 0                                         | 0.28                           | 0.1               | 0.49                  | 0.17                | 83.24                | <i>Lewinella</i>                    | <i>Saprospiraceae</i>               | <i>Sphingobacteriales</i>           | <i>Sphingobacteria</i>         | <i>Bacteroidetes</i>     | <i>Bacteria</i> |
| Otu0417 | 0                                         | 0.28                           | 0.1               | 0.49                  | 0.17                | 83.42                | <i>Maribacter</i>                   | <i>Flavobacteriaceae</i>            | <i>Flavobacteriales</i>             | <i>Flavobacteria</i>           | <i>Bacteroidetes</i>     | <i>Bacteria</i> |
| Otu0168 | 0                                         | 0.28                           | 0.09              | 0.49                  | 0.16                | 83.58                | unclass. <i>Flavobacteriaceae</i>   | <i>Flavobacteriaceae</i>            | <i>Flavobacteriales</i>             | <i>Flavobacteria</i>           | <i>Bacteroidetes</i>     | <i>Bacteria</i> |
| Otu0224 | 0                                         | 0.28                           | 0.09              | 0.49                  | 0.16                | 83.74                | unclass. <i>Flavobacteriaceae</i>   | <i>Flavobacteriaceae</i>            | <i>Flavobacteriales</i>             | <i>Flavobacteria</i>           | <i>Bacteroidetes</i>     | <i>Bacteria</i> |
| Otu0154 | 0                                         | 0.2                            | 0.08              | 0.49                  | 0.14                | 83.88                | unclass. <i>Gammaproteobacteria</i> | unclass. <i>Gammaproteobacteria</i> | unclass. <i>Gammaproteobacteria</i> | <i>Gammaproteobacteria</i>     | <i>Proteobacteria</i>    | <i>Bacteria</i> |
| Otu0188 | 0                                         | 0.2                            | 0.08              | 0.49                  | 0.14                | 84.03                | <i>Ulvibacter</i>                   | <i>Flavobacteriaceae</i>            | <i>Flavobacteriales</i>             | <i>Flavobacteria</i>           | <i>Bacteroidetes</i>     | <i>Bacteria</i> |
| Otu0247 | 0                                         | 0.2                            | 0.08              | 0.49                  | 0.14                | 84.17                | unclass. <i>Flavobacteriaceae</i>   | <i>Flavobacteriaceae</i>            | <i>Flavobacteriales</i>             | <i>Flavobacteria</i>           | <i>Bacteroidetes</i>     | <i>Bacteria</i> |
| Otu0250 | 0                                         | 0.2                            | 0.08              | 0.49                  | 0.14                | 84.32                | unclass. <i>Bacteria</i>            | unclass. <i>Bacteria</i>            | unclass. <i>Bacteria</i>            | unclass. <i>Bacteria</i>       | unclass. <i>Bacteria</i> | <i>Bacteria</i> |
| Otu0269 | 0                                         | 0.2                            | 0.08              | 0.49                  | 0.14                | 84.46                | unclass. <i>Gammaproteobacteria</i> | unclass. <i>Gammaproteobacteria</i> | unclass. <i>Gammaproteobacteria</i> | <i>Gammaproteobacteria</i>     | <i>Proteobacteria</i>    | <i>Bacteria</i> |
| Otu0301 | 0                                         | 0.2                            | 0.08              | 0.49                  | 0.14                | 84.6                 | <i>Paracoccus</i>                   | <i>Rhodobacteraceae</i>             | <i>Rhodobacterales</i>              | <i>Alphaproteobacteria</i>     | <i>Proteobacteria</i>    | <i>Bacteria</i> |
| Otu0305 | 0                                         | 0.2                            | 0.08              | 0.49                  | 0.14                | 84.75                | unclass. <i>Bacteria</i>            | unclass. <i>Bacteria</i>            | unclass. <i>Bacteria</i>            | unclass. <i>Bacteria</i>       | unclass. <i>Bacteria</i> | <i>Bacteria</i> |
| Otu0371 | 0                                         | 0.2                            | 0.08              | 0.49                  | 0.14                | 84.89                | <i>Crocinitomix</i>                 | <i>Cryomorphaceae</i>               | <i>Flavobacteriales</i>             | <i>Flavobacteria</i>           | <i>Bacteroidetes</i>     | <i>Bacteria</i> |
| Otu0372 | 0                                         | 0.2                            | 0.08              | 0.49                  | 0.14                | 85.04                | unclass. <i>Flavobacteriaceae</i>   | <i>Flavobacteriaceae</i>            | <i>Flavobacteriales</i>             | <i>Flavobacteria</i>           | <i>Bacteroidetes</i>     | <i>Bacteria</i> |
| Otu0374 | 0                                         | 0.2                            | 0.08              | 0.49                  | 0.14                | 85.18                | unclass. <i>Flavobacteriaceae</i>   | <i>Flavobacteriaceae</i>            | <i>Flavobacteriales</i>             | <i>Flavobacteria</i>           | <i>Bacteroidetes</i>     | <i>Bacteria</i> |
| Otu0185 | 0                                         | 0.2                            | 0.08              | 0.49                  | 0.13                | 85.31                | unclass. <i>Bacteria</i>            | unclass. <i>Bacteria</i>            | unclass. <i>Bacteria</i>            | unclass. <i>Bacteria</i>       | unclass. <i>Bacteria</i> | <i>Bacteria</i> |
| Otu0225 | 0                                         | 0.2                            | 0.08              | 0.49                  | 0.13                | 85.44                | unclass. <i>Bacteria</i>            | unclass. <i>Bacteria</i>            | unclass. <i>Bacteria</i>            | unclass. <i>Bacteria</i>       | unclass. <i>Bacteria</i> | <i>Bacteria</i> |
| Otu0238 | 0                                         | 0.2                            | 0.08              | 0.49                  | 0.13                | 85.58                | <i>Haliea</i>                       | <i>Alteromonadaceae</i>             | <i>Alteromonadales</i>              | <i>Gammaproteobacteria</i>     | <i>Proteobacteria</i>    | <i>Bacteria</i> |
| Otu0288 | 0                                         | 0.2                            | 0.08              | 0.49                  | 0.13                | 85.71                | <i>Ulvibacter</i>                   | <i>Flavobacteriaceae</i>            | <i>Flavobacteriales</i>             | <i>Flavobacteria</i>           | <i>Bacteroidetes</i>     | <i>Bacteria</i> |

| OTU     | Av.A <sub>i</sub><br>(pH <i>in situ</i> ) | Av.A <sub>i</sub><br>(pH 7.67) | Av.δ <sub>i</sub> | Av.δ <sub>i</sub> /SD | Av.δ <sub>i</sub> % | ΣAv.δ <sub>i</sub> % | Genus                               | Family                              | Order                               | Class                          | Phylum                   | Domain                 |
|---------|-------------------------------------------|--------------------------------|-------------------|-----------------------|---------------------|----------------------|-------------------------------------|-------------------------------------|-------------------------------------|--------------------------------|--------------------------|------------------------|
| Otu0328 | 0                                         | 0.2                            | 0.08              | 0.49                  | 0.13                | 85.84                | unclass. <i>Proteobacteria</i>      | unclass. <i>Proteobacteria</i>      | unclass. <i>Proteobacteria</i>      | unclass. <i>Proteobacteria</i> | <i>Proteobacteria</i>    | <i>Bacteria</i>        |
| Otu0343 | 0                                         | 0.2                            | 0.08              | 0.49                  | 0.13                | 85.97                | unclass. <i>Proteobacteria</i>      | unclass. <i>Proteobacteria</i>      | unclass. <i>Proteobacteria</i>      | unclass. <i>Proteobacteria</i> | <i>Proteobacteria</i>    | <i>Bacteria</i>        |
| Otu0384 | 0                                         | 0.2                            | 0.08              | 0.49                  | 0.13                | 86.1                 | unclass. <i>Bacteroidetes</i>       | unclass. <i>Bacteroidetes</i>       | unclass. <i>Bacteroidetes</i>       | unclass. <i>Bacteroidetes</i>  | <i>Bacteroidetes</i>     | <i>Bacteria</i>        |
| Otu0423 | 0                                         | 0.2                            | 0.08              | 0.49                  | 0.13                | 86.23                | unclass. <i>Flavobacteriaceae</i>   | <i>Flavobacteriaceae</i>            | <i>Flavobacteriales</i>             | <i>Flavobacteria</i>           | <i>Bacteroidetes</i>     | <i>Bacteria</i>        |
| Otu0424 | 0                                         | 0.2                            | 0.08              | 0.49                  | 0.13                | 86.36                | unclass. <i>Flavobacteriales</i>    | unclass. <i>Flavobacteriales</i>    | <i>Flavobacteriales</i>             | <i>Flavobacteria</i>           | <i>Bacteroidetes</i>     | <i>Bacteria</i>        |
| Otu0425 | 0                                         | 0.2                            | 0.08              | 0.49                  | 0.13                | 86.49                | <i>Colwellia</i>                    | <i>Colwelliaceae</i>                | <i>Alteromonadales</i>              | <i>Gammaproteobacteria</i>     | <i>Proteobacteria</i>    | <i>Bacteria</i>        |
| Otu0426 | 0                                         | 0.2                            | 0.08              | 0.49                  | 0.13                | 86.63                | unclass. <i>Gammaproteobacteria</i> | unclass. <i>Gammaproteobacteria</i> | unclass. <i>Gammaproteobacteria</i> | <i>Gammaproteobacteria</i>     | <i>Proteobacteria</i>    | <i>Bacteria</i>        |
| Otu0429 | 0                                         | 0.2                            | 0.08              | 0.49                  | 0.13                | 86.76                | unclass. <i>Flavobacteriales</i>    | unclass. <i>Flavobacteriales</i>    | <i>Flavobacteriales</i>             | <i>Flavobacteria</i>           | <i>Bacteroidetes</i>     | <i>Bacteria</i>        |
| Otu0432 | 0                                         | 0.2                            | 0.08              | 0.49                  | 0.13                | 86.89                | unclass. <i>Gammaproteobacteria</i> | unclass. <i>Gammaproteobacteria</i> | unclass. <i>Gammaproteobacteria</i> | <i>Gammaproteobacteria</i>     | <i>Proteobacteria</i>    | <i>Bacteria</i>        |
| Otu0433 | 0                                         | 0.2                            | 0.08              | 0.49                  | 0.13                | 87.02                | <i>Photobacterium</i>               | <i>Vibrionaceae</i>                 | <i>Vibrionales</i>                  | <i>Gammaproteobacteria</i>     | <i>Proteobacteria</i>    | <i>Bacteria</i>        |
| Otu0028 | 0.2                                       | 0                              | 0.07              | 0.49                  | 0.13                | 87.15                | unclass. <i>Gammaproteobacteria</i> | unclass. <i>Gammaproteobacteria</i> | unclass. <i>Gammaproteobacteria</i> | <i>Gammaproteobacteria</i>     | <i>Proteobacteria</i>    | <i>Bacteria</i>        |
| Otu0327 | 0.2                                       | 0                              | 0.07              | 0.49                  | 0.13                | 87.28                | unclass. <i>Bacteria</i>            | unclass. <i>Bacteria</i>            | unclass. <i>Bacteria</i>            | unclass. <i>Bacteria</i>       | unclass. <i>Bacteria</i> | <i>Bacteria</i>        |
| Otu0333 | 0.2                                       | 0                              | 0.07              | 0.49                  | 0.13                | 87.41                | unclass. <i>Gammaproteobacteria</i> | unclass. <i>Gammaproteobacteria</i> | unclass. <i>Gammaproteobacteria</i> | <i>Gammaproteobacteria</i>     | <i>Proteobacteria</i>    | <i>Bacteria</i>        |
| Otu0340 | 0.2                                       | 0                              | 0.07              | 0.49                  | 0.13                | 87.54                | unclass. <i>Bacteria</i>            | unclass. <i>Bacteria</i>            | unclass. <i>Bacteria</i>            | unclass. <i>Bacteria</i>       | unclass. <i>Bacteria</i> | <i>Bacteria</i>        |
| Otu0344 | 0.2                                       | 0                              | 0.07              | 0.49                  | 0.13                | 87.67                | unclass. <i>Flavobacteriaceae</i>   | <i>Flavobacteriaceae</i>            | <i>Flavobacteriales</i>             | <i>Flavobacteria</i>           | <i>Bacteroidetes</i>     | <i>Bacteria</i>        |
| Otu0076 | 0.2                                       | 0                              | 0.07              | 0.49                  | 0.13                | 87.8                 | unclass. <i>Flammeovirgaceae</i>    | <i>Flammeovirgaceae</i>             | <i>Sphingobacteriales</i>           | <i>Sphingobacteria</i>         | <i>Bacteroidetes</i>     | <i>Bacteria</i>        |
| Otu0183 | 0.2                                       | 0                              | 0.07              | 0.49                  | 0.13                | 87.93                | unclass. <i>Bacteroidetes</i>       | unclass. <i>Bacteroidetes</i>       | unclass. <i>Bacteroidetes</i>       | unclass. <i>Bacteroidetes</i>  | <i>Bacteroidetes</i>     | <i>Bacteria</i>        |
| Otu0255 | 0.2                                       | 0                              | 0.07              | 0.49                  | 0.13                | 88.06                | <i>Sphingopyxis</i>                 | <i>Sphingomonadaceae</i>            | <i>Sphingomonadales</i>             | <i>Alphaproteobacteria</i>     | <i>Proteobacteria</i>    | <i>Bacteria</i>        |
| Otu0258 | 0.2                                       | 0                              | 0.07              | 0.49                  | 0.13                | 88.18                | <i>Haliea</i>                       | <i>Alteromonadaceae</i>             | <i>Alteromonadales</i>              | <i>Gammaproteobacteria</i>     | <i>Proteobacteria</i>    | <i>Bacteria</i>        |
| Otu0152 | 0.2                                       | 0                              | 0.07              | 0.49                  | 0.13                | 88.31                | unclass. <i>Gammaproteobacteria</i> | unclass. <i>Gammaproteobacteria</i> | unclass. <i>Gammaproteobacteria</i> | <i>Gammaproteobacteria</i>     | <i>Proteobacteria</i>    | <i>Bacteria</i>        |
| Otu0153 | 0.2                                       | 0                              | 0.07              | 0.49                  | 0.13                | 88.44                | unclass. <i>Gammaproteobacteria</i> | unclass. <i>Gammaproteobacteria</i> | unclass. <i>Gammaproteobacteria</i> | <i>Gammaproteobacteria</i>     | <i>Proteobacteria</i>    | <i>Bacteria</i>        |
| Otu0156 | 0.2                                       | 0                              | 0.07              | 0.49                  | 0.13                | 88.57                | unclass. <i>Gammaproteobacteria</i> | unclass. <i>Gammaproteobacteria</i> | unclass. <i>Gammaproteobacteria</i> | <i>Gammaproteobacteria</i>     | <i>Proteobacteria</i>    | <i>Bacteria</i>        |
| Otu0176 | 0.2                                       | 0                              | 0.07              | 0.49                  | 0.13                | 88.7                 | <i>Colwellia</i>                    | <i>Colwelliaceae</i>                | <i>Alteromonadales</i>              | <i>Gammaproteobacteria</i>     | <i>Proteobacteria</i>    | <i>Bacteria</i>        |
| Otu0179 | 0.2                                       | 0                              | 0.07              | 0.49                  | 0.13                | 88.83                | unclass. <i>Sphingobacteriales</i>  | unclass. <i>Sphingobacteriales</i>  | <i>Sphingobacteriales</i>           | <i>Sphingobacteria</i>         | <i>Bacteroidetes</i>     | <i>Bacteria</i>        |
| Otu0181 | 0.2                                       | 0                              | 0.07              | 0.49                  | 0.13                | 88.96                | unclass. <i>Domain</i>              | unclass. <i>Domain</i>              | unclass. <i>Domain</i>              | unclass. <i>Domain</i>         | unclass. <i>Domain</i>   | unclass. <i>Domain</i> |
| Otu0197 | 0.2                                       | 0                              | 0.07              | 0.49                  | 0.13                | 89.09                | unclass. <i>Bacteria</i>            | unclass. <i>Bacteria</i>            | unclass. <i>Bacteria</i>            | unclass. <i>Bacteria</i>       | unclass. <i>Bacteria</i> | <i>Bacteria</i>        |
| Otu0208 | 0.2                                       | 0                              | 0.07              | 0.49                  | 0.13                | 89.22                | unclass. <i>Saprosiraceae</i>       | <i>Saprosiraceae</i>                | <i>Sphingobacteriales</i>           | <i>Sphingobacteria</i>         | <i>Bacteroidetes</i>     | <i>Bacteria</i>        |

| OTU                                                     | Av.A <sub>i</sub><br>(pH <i>in situ</i> ) | Av.A <sub>i</sub><br>(pH 7.67) | Av.δ <sub>i</sub> | Av.δ <sub>i</sub> /SD | Av.δ <sub>i</sub> % | ΣAv.δ <sub>i</sub> % | Genus                               | Family                              | Order                               | Class                         | Phylum                   | Domain          |
|---------------------------------------------------------|-------------------------------------------|--------------------------------|-------------------|-----------------------|---------------------|----------------------|-------------------------------------|-------------------------------------|-------------------------------------|-------------------------------|--------------------------|-----------------|
| Otu0226                                                 | 0.2                                       | 0                              | 0.07              | 0.49                  | 0.13                | 89.35                | unclass. <i>Bacteroidetes</i>       | unclass. <i>Bacteroidetes</i>       | unclass. <i>Bacteroidetes</i>       | unclass. <i>Bacteroidetes</i> | <i>Bacteroidetes</i>     | <i>Bacteria</i> |
| Otu0031                                                 | 0.2                                       | 0                              | 0.07              | 0.49                  | 0.13                | 89.47                | unclass. <i>Gammaproteobacteria</i> | unclass. <i>Gammaproteobacteria</i> | unclass. <i>Gammaproteobacteria</i> | <i>Gammaproteobacteria</i>    | <i>Proteobacteria</i>    | <i>Bacteria</i> |
| Otu0277                                                 | 0.2                                       | 0                              | 0.07              | 0.49                  | 0.13                | 89.6                 | unclass. <i>Flavobacteriaceae</i>   | <i>Flavobacteriaceae</i>            | <i>Flavobacteriales</i>             | <i>Flavobacteria</i>          | <i>Bacteroidetes</i>     | <i>Bacteria</i> |
| Otu0287                                                 | 0.2                                       | 0                              | 0.07              | 0.49                  | 0.13                | 89.73                | <i>Haliscomenobacter</i>            | <i>Saprospiraceae</i>               | <i>Sphingobacteriales</i>           | <i>Sphingobacteria</i>        | <i>Bacteroidetes</i>     | <i>Bacteria</i> |
| Otu0296                                                 | 0.2                                       | 0                              | 0.07              | 0.49                  | 0.13                | 89.85                | <i>Polaribacter</i>                 | <i>Flavobacteriaceae</i>            | <i>Flavobacteriales</i>             | <i>Flavobacteria</i>          | <i>Bacteroidetes</i>     | <i>Bacteria</i> |
| Otu0309                                                 | 0.2                                       | 0                              | 0.07              | 0.49                  | 0.13                | 89.98                | unclass. <i>Bacteria</i>            | unclass. <i>Bacteria</i>            | unclass. <i>Bacteria</i>            | unclass. <i>Bacteria</i>      | unclass. <i>Bacteria</i> | <i>Bacteria</i> |
| Otu0311                                                 | 0.2                                       | 0                              | 0.07              | 0.49                  | 0.13                | 90.11                | unclass. <i>Gammaproteobacteria</i> | unclass. <i>Gammaproteobacteria</i> | unclass. <i>Gammaproteobacteria</i> | <i>Gammaproteobacteria</i>    | <i>Proteobacteria</i>    | <i>Bacteria</i> |
| Spring 'serial dilution' (average dissimilarity: 52.1%) |                                           |                                |                   |                       |                     |                      |                                     |                                     |                                     |                               |                          |                 |
| Otu0035                                                 | 9.32                                      | 2.06                           | 6.2               | 1.2                   | 11.89               | 11.89                | <i>Colwellia</i>                    | <i>Colwelliaceae</i>                | <i>Alteromonadales</i>              | <i>Gammaproteobacteria</i>    | <i>Proteobacteria</i>    | <i>Bacteria</i> |
| Otu0027                                                 | 11.23                                     | 18.57                          | 5.74              | 1.25                  | 11.02               | 22.9                 | <i>Pseudoalteromonas</i>            | <i>Pseudoalteromonadaceae</i>       | <i>Alteromonadales</i>              | <i>Gammaproteobacteria</i>    | <i>Proteobacteria</i>    | <i>Bacteria</i> |
| Otu0106                                                 | 7.05                                      | 4.44                           | 2.99              | 2.06                  | 5.73                | 28.64                | <i>Marinomonas</i>                  | <i>Oceanospirillaceae</i>           | <i>Oceanospirillales</i>            | <i>Gammaproteobacteria</i>    | <i>Proteobacteria</i>    | <i>Bacteria</i> |
| Otu0039                                                 | 0.68                                      | 4.41                           | 2.86              | 1.78                  | 5.49                | 34.13                | <i>Pseudoalteromonas</i>            | <i>Pseudoalteromonadaceae</i>       | <i>Alteromonadales</i>              | <i>Gammaproteobacteria</i>    | <i>Proteobacteria</i>    | <i>Bacteria</i> |
| Otu0109                                                 | 1.72                                      | 3.81                           | 2.78              | 2.99                  | 5.34                | 39.46                | <i>Alteromonas</i>                  | <i>Alteromonadaceae</i>             | <i>Alteromonadales</i>              | <i>Gammaproteobacteria</i>    | <i>Proteobacteria</i>    | <i>Bacteria</i> |
| Otu0010                                                 | 3.24                                      | 0.35                           | 2.22              | 0.58                  | 4.26                | 43.72                | unclass. <i>Flavobacteriaceae</i>   | <i>Flavobacteriaceae</i>            | <i>Flavobacteriales</i>             | <i>Flavobacteria</i>          | <i>Bacteroidetes</i>     | <i>Bacteria</i> |
| Otu0036                                                 | 3.68                                      | 1.53                           | 1.87              | 1.85                  | 3.58                | 47.31                | <i>Glaciecola</i>                   | <i>Alteromonadaceae</i>             | <i>Alteromonadales</i>              | <i>Gammaproteobacteria</i>    | <i>Proteobacteria</i>    | <i>Bacteria</i> |
| Otu0115                                                 | 1.02                                      | 2.07                           | 1.71              | 4.68                  | 3.28                | 50.59                | <i>Glaciecola</i>                   | <i>Alteromonadaceae</i>             | <i>Alteromonadales</i>              | <i>Gammaproteobacteria</i>    | <i>Proteobacteria</i>    | <i>Bacteria</i> |
| Otu0107                                                 | 4.07                                      | 2.41                           | 1.69              | 1.36                  | 3.24                | 53.83                | unclass. <i>Rhodobacteraceae</i>    | <i>Rhodobacteraceae</i>             | <i>Rhodobacterales</i>              | <i>Alphaproteobacteria</i>    | <i>Proteobacteria</i>    | <i>Bacteria</i> |
| Otu0113                                                 | 1.95                                      | 2.22                           | 1.51              | 2.6                   | 2.89                | 56.73                | <i>Colwellia</i>                    | <i>Colwelliaceae</i>                | <i>Alteromonadales</i>              | <i>Gammaproteobacteria</i>    | <i>Proteobacteria</i>    | <i>Bacteria</i> |
| Otu0114                                                 | 0.75                                      | 2.57                           | 1.48              | 1.61                  | 2.84                | 59.56                | <i>Shewanella</i>                   | <i>Shewanellaceae</i>               | <i>Alteromonadales</i>              | <i>Gammaproteobacteria</i>    | <i>Proteobacteria</i>    | <i>Bacteria</i> |
| Otu0117                                                 | 0                                         | 1.87                           | 1.44              | 2.37                  | 2.76                | 62.33                | <i>Arcobacter</i>                   | <i>Campylobacteraceae</i>           | <i>Campylobacterales</i>            | <i>Epsilonproteobacteria</i>  | <i>Proteobacteria</i>    | <i>Bacteria</i> |
| Otu0110                                                 | 0.96                                      | 1.25                           | 1.25              | 0.99                  | 2.4                 | 64.73                | unclass. <i>Rhodobacteraceae</i>    | <i>Rhodobacteraceae</i>             | <i>Rhodobacterales</i>              | <i>Alphaproteobacteria</i>    | <i>Proteobacteria</i>    | <i>Bacteria</i> |
| Otu0111                                                 | 2.28                                      | 3                              | 1.25              | 1.61                  | 2.4                 | 67.13                | <i>Marinomonas</i>                  | <i>Oceanospirillaceae</i>           | <i>Oceanospirillales</i>            | <i>Gammaproteobacteria</i>    | <i>Proteobacteria</i>    | <i>Bacteria</i> |
| Otu0108                                                 | 1.4                                       | 1.69                           | 1.09              | 1.25                  | 2.1                 | 69.23                | unclass. <i>Colwelliaceae</i>       | <i>Colwelliaceae</i>                | <i>Alteromonadales</i>              | <i>Gammaproteobacteria</i>    | <i>Proteobacteria</i>    | <i>Bacteria</i> |
| Otu0059                                                 | 1.29                                      | 2.27                           | 1.08              | 1.45                  | 2.07                | 71.3                 | <i>Flavobacterium</i>               | <i>Flavobacteriaceae</i>            | <i>Flavobacteriales</i>             | <i>Flavobacteria</i>          | <i>Bacteroidetes</i>     | <i>Bacteria</i> |
| Otu0041                                                 | 0.89                                      | 1.5                            | 0.98              | 1.28                  | 1.89                | 73.19                | <i>Sulfitobacter</i>                | <i>Rhodobacteraceae</i>             | <i>Rhodobacterales</i>              | <i>Alphaproteobacteria</i>    | <i>Proteobacteria</i>    | <i>Bacteria</i> |
| Otu0116                                                 | 0                                         | 1.27                           | 0.97              | 1.48                  | 1.87                | 75.06                | <i>Flavobacterium</i>               | <i>Flavobacteriaceae</i>            | <i>Flavobacteriales</i>             | <i>Flavobacteria</i>          | <i>Bacteroidetes</i>     | <i>Bacteria</i> |
| Otu0123                                                 | 1.12                                      | 1.22                           | 0.88              | 1.29                  | 1.69                | 76.75                | unclass. <i>Gammaproteobacteria</i> | unclass. <i>Gammaproteobacteria</i> | unclass. <i>Gammaproteobacteria</i> | <i>Gammaproteobacteria</i>    | <i>Proteobacteria</i>    | <i>Bacteria</i> |



| OTU                                                 | Av. A <sub>i</sub><br>(pH <i>in situ</i> ) | Av. A <sub>i</sub><br>(pH 7.67) | Av. δ <sub>i</sub> | Av. δ <sub>i</sub> /SD | Av. δ <sub>i</sub> % | ΣAv. δ <sub>i</sub> % | Genus                                  | Family                              | Order                               | Class                      | Phylum                   | Domain          |
|-----------------------------------------------------|--------------------------------------------|---------------------------------|--------------------|------------------------|----------------------|-----------------------|----------------------------------------|-------------------------------------|-------------------------------------|----------------------------|--------------------------|-----------------|
| Otu0055                                             | 0.91                                       | 0.61                            | 0.83               | 1.3                    | 1.58                 | 78.33                 | <i>Colwellia</i>                       | <i>Colwelliaceae</i>                | <i>Alteromonadales</i>              | <i>Gammaproteobacteria</i> | <i>Proteobacteria</i>    | <i>Bacteria</i> |
| Otu0112                                             | 0.48                                       | 1.26                            | 0.82               | 1.17                   | 1.58                 | 79.91                 | <i>Polaribacter</i>                    | <i>Flavobacteriaceae</i>            | <i>Flavobacteriales</i>             | <i>Flavobacteria</i>       | <i>Bacteroidetes</i>     | <i>Bacteria</i> |
| Otu0132                                             | 1.08                                       | 0.85                            | 0.7                | 1.51                   | 1.34                 | 81.25                 | unclass. <i>Alteromonadales</i>        | unclass. <i>Alteromonadales</i>     | <i>Alteromonadales</i>              | <i>Gammaproteobacteria</i> | <i>Proteobacteria</i>    | <i>Bacteria</i> |
| Otu0120                                             | 0.48                                       | 1.29                            | 0.67               | 1.53                   | 1.28                 | 82.53                 | <i>Pseudoalteromonas</i>               | <i>Pseudoalteromonadaceae</i>       | <i>Alteromonadales</i>              | <i>Gammaproteobacteria</i> | <i>Proteobacteria</i>    | <i>Bacteria</i> |
| Otu0133                                             | 0                                          | 0.68                            | 0.51               | 0.9                    | 0.98                 | 83.51                 | <i>Colwellia</i>                       | <i>Colwelliaceae</i>                | <i>Alteromonadales</i>              | <i>Gammaproteobacteria</i> | <i>Proteobacteria</i>    | <i>Bacteria</i> |
| Otu0140                                             | 0.4                                        | 0.43                            | 0.49               | 0.95                   | 0.93                 | 84.44                 | <i>Oleispira</i>                       | <i>Oceanospirillaceae</i>           | <i>Oceanospirillales</i>            | <i>Gammaproteobacteria</i> | <i>Proteobacteria</i>    | <i>Bacteria</i> |
| Otu0124                                             | 0.4                                        | 0.43                            | 0.48               | 0.73                   | 0.93                 | 85.37                 | <i>Loktanelia</i>                      | <i>Rhodobacteraceae</i>             | <i>Rhodobacterales</i>              | <i>Alphaproteobacteria</i> | <i>Proteobacteria</i>    | <i>Bacteria</i> |
| Otu0437                                             | 0                                          | 0.6                             | 0.47               | 0.93                   | 0.9                  | 86.27                 | <i>Flavobacterium</i>                  | <i>Flavobacteriaceae</i>            | <i>Flavobacteriales</i>             | <i>Flavobacteria</i>       | <i>Bacteroidetes</i>     | <i>Bacteria</i> |
| Otu0572                                             | 0.2                                        | 0.43                            | 0.42               | 0.72                   | 0.8                  | 87.07                 | <i>Croceibacter</i>                    | <i>Flavobacteriaceae</i>            | <i>Flavobacteriales</i>             | <i>Flavobacteria</i>       | <i>Bacteroidetes</i>     | <i>Bacteria</i> |
| Otu0176                                             | 0.48                                       | 0                               | 0.39               | 0.77                   | 0.75                 | 87.81                 | <i>Colwellia</i>                       | <i>Colwelliaceae</i>                | <i>Alteromonadales</i>              | <i>Gammaproteobacteria</i> | <i>Proteobacteria</i>    | <i>Bacteria</i> |
| Otu0438                                             | 0                                          | 0.5                             | 0.38               | 0.97                   | 0.73                 | 88.55                 | <i>Tenacibaculum</i>                   | <i>Flavobacteriaceae</i>            | <i>Flavobacteriales</i>             | <i>Flavobacteria</i>       | <i>Bacteroidetes</i>     | <i>Bacteria</i> |
| Otu0118                                             | 0.4                                        | 0.25                            | 0.35               | 0.88                   | 0.67                 | 89.22                 | <i>Colwellia</i>                       | <i>Colwelliaceae</i>                | <i>Alteromonadales</i>              | <i>Gammaproteobacteria</i> | <i>Proteobacteria</i>    | <i>Bacteria</i> |
| Otu0320                                             | 0.2                                        | 0.35                            | 0.35               | 0.73                   | 0.67                 | 89.89                 | <i>Pseudoalteromonas</i>               | <i>Pseudoalteromonadaceae</i>       | <i>Alteromonadales</i>              | <i>Gammaproteobacteria</i> | <i>Proteobacteria</i>    | <i>Bacteria</i> |
| Otu0119                                             | 0                                          | 0.35                            | 0.28               | 0.56                   | 0.53                 | 90.42                 | <i>Colwellia</i>                       | <i>Colwelliaceae</i>                | <i>Alteromonadales</i>              | <i>Gammaproteobacteria</i> | <i>Proteobacteria</i>    | <i>Bacteria</i> |
| Summer 'no dilution' (average dissimilarity: 53.4%) |                                            |                                 |                    |                        |                      |                       |                                        |                                     |                                     |                            |                          |                 |
| Otu0691                                             | 5.44                                       | 2.99                            | 0.83               | 1.56                   | 1.55                 | 1.55                  | <i>Planctomyces</i>                    | <i>Planctomycetaceae</i>            | <i>Planctomycetales</i>             | <i>Planctomycetacia</i>    | <i>Planctomycetes</i>    | <i>Bacteria</i> |
| Otu0469                                             | 1.52                                       | 3.64                            | 0.78               | 1.71                   | 1.45                 | 3.01                  | unclass. <i>Bacteria</i>               | unclass. <i>Bacteria</i>            | unclass. <i>Bacteria</i>            | unclass. <i>Bacteria</i>   | unclass. <i>Bacteria</i> | <i>Bacteria</i> |
| Otu0779                                             | 0.95                                       | 2.48                            | 0.73               | 1.35                   | 1.37                 | 4.38                  | unclass. <i>Ectothiorhodospiraceae</i> | <i>Ectothiorhodospiraceae</i>       | <i>Chromatiales</i>                 | <i>Gammaproteobacteria</i> | <i>Proteobacteria</i>    | <i>Bacteria</i> |
| Otu0001                                             | 4.58                                       | 3.07                            | 0.61               | 1.37                   | 1.14                 | 5.52                  | unclass. <i>Flavobacteriaceae</i>      | <i>Flavobacteriaceae</i>            | <i>Flavobacteriales</i>             | <i>Flavobacteria</i>       | <i>Bacteroidetes</i>     | <i>Bacteria</i> |
| Otu0010                                             | 0.88                                       | 2.58                            | 0.59               | 1.55                   | 1.1                  | 6.62                  | unclass. <i>Flavobacteriaceae</i>      | <i>Flavobacteriaceae</i>            | <i>Flavobacteriales</i>             | <i>Flavobacteria</i>       | <i>Bacteroidetes</i>     | <i>Bacteria</i> |
| Otu0753                                             | 0.95                                       | 1.22                            | 0.53               | 1.03                   | 0.99                 | 7.61                  | unclass. <i>Flavobacteriales</i>       | unclass. <i>Flavobacteriales</i>    | <i>Flavobacteriales</i>             | <i>Flavobacteria</i>       | <i>Bacteroidetes</i>     | <i>Bacteria</i> |
| Otu0450                                             | 1.66                                       | 1.2                             | 0.52               | 1.28                   | 0.97                 | 8.58                  | <i>Sphingobium</i>                     | <i>Sphingomonadaceae</i>            | <i>Sphingomonadales</i>             | <i>Alphaproteobacteria</i> | <i>Proteobacteria</i>    | <i>Bacteria</i> |
| Otu0693                                             | 3.22                                       | 2.46                            | 0.5                | 1.32                   | 0.93                 | 9.51                  | <i>Planctomyces</i>                    | <i>Planctomycetaceae</i>            | <i>Planctomycetales</i>             | <i>Planctomycetacia</i>    | <i>Planctomycetes</i>    | <i>Bacteria</i> |
| Otu0005                                             | 15.27                                      | 15.85                           | 0.5                | 1.45                   | 0.93                 | 10.44                 | <i>Pelagibacter</i>                    | SAR11-clade                         | <i>Rickettsiales</i>                | <i>Alphaproteobacteria</i> | <i>Proteobacteria</i>    | <i>Bacteria</i> |
| Otu0002                                             | 0.4                                        | 1.81                            | 0.48               | 1.62                   | 0.91                 | 11.35                 | unclass. <i>Flavobacteriaceae</i>      | <i>Flavobacteriaceae</i>            | <i>Flavobacteriales</i>             | <i>Flavobacteria</i>       | <i>Bacteroidetes</i>     | <i>Bacteria</i> |
| Otu0203                                             | 3.14                                       | 3.03                            | 0.48               | 1.38                   | 0.89                 | 12.24                 | <i>Pelagibacter</i>                    | SAR11-clade                         | <i>Rickettsiales</i>                | <i>Alphaproteobacteria</i> | <i>Proteobacteria</i>    | <i>Bacteria</i> |
| Otu0084                                             | 0.93                                       | 2.23                            | 0.46               | 1.57                   | 0.86                 | 13.1                  | unclass. <i>Gammaproteobacteria</i>    | unclass. <i>Gammaproteobacteria</i> | unclass. <i>Gammaproteobacteria</i> | <i>Gammaproteobacteria</i> | <i>Proteobacteria</i>    | <i>Bacteria</i> |

| OTU     | Av.A <sub>i</sub><br>(pH <i>in situ</i> ) | Av.A <sub>i</sub><br>(pH 7.67) | Av.δ <sub>i</sub> | Av.δ <sub>i</sub> /SD | Av.δ <sub>i</sub> % | ΣAv.δ <sub>i</sub> % | Genus                               | Family                                | Order                                      | Class                          | Phylum                   | Domain          |
|---------|-------------------------------------------|--------------------------------|-------------------|-----------------------|---------------------|----------------------|-------------------------------------|---------------------------------------|--------------------------------------------|--------------------------------|--------------------------|-----------------|
| Otu0352 | 0.4                                       | 1.47                           | 0.42              | 1.72                  | 0.79                | 13.89                | unclass. <i>Flavobacteriaceae</i>   | <i>Flavobacteriaceae</i>              | <i>Flavobacteriales</i>                    | <i>Flavobacteria</i>           | <i>Bacteroidetes</i>     | <i>Bacteria</i> |
| Otu0512 | 1.58                                      | 0.89                           | 0.42              | 1.37                  | 0.79                | 14.68                | <i>Rhodopirellula</i>               | <i>Planctomycetaceae</i>              | <i>Planctomycetales</i>                    | <i>Planctomycetacia</i>        | <i>Planctomycetes</i>    | <i>Bacteria</i> |
| Otu0695 | 1.12                                      | 1.38                           | 0.4               | 1.4                   | 0.75                | 15.42                | unclass. <i>Proteobacteria</i>      | unclass. <i>Proteobacteria</i>        | unclass. <i>Proteobacteria</i>             | unclass. <i>Proteobacteria</i> | <i>Proteobacteria</i>    | <i>Bacteria</i> |
| Otu0277 | 0.4                                       | 1.56                           | 0.4               | 1.73                  | 0.75                | 16.17                | unclass. <i>Flavobacteriaceae</i>   | <i>Flavobacteriaceae</i>              | <i>Flavobacteriales</i>                    | <i>Flavobacteria</i>           | <i>Bacteroidetes</i>     | <i>Bacteria</i> |
| Otu0157 | 1.37                                      | 0.55                           | 0.4               | 1.38                  | 0.74                | 16.91                | unclass. <i>Gammaproteobacteria</i> | unclass. <i>Gammaproteobacteria</i>   | unclass. <i>Gammaproteobacteria</i>        | <i>Gammaproteobacteria</i>     | <i>Proteobacteria</i>    | <i>Bacteria</i> |
| Otu0705 | 1.19                                      | 0.28                           | 0.39              | 1.24                  | 0.73                | 17.64                | <i>Planctomyces</i>                 | <i>Planctomycetaceae</i>              | <i>Planctomycetales</i>                    | <i>Planctomycetacia</i>        | <i>Planctomycetes</i>    | <i>Bacteria</i> |
| Otu0007 | 2.06                                      | 1.13                           | 0.39              | 1.23                  | 0.72                | 18.36                | unclass. <i>Flavobacteriales</i>    | unclass. <i>Flavobacteriales</i>      | <i>Flavobacteriales</i>                    | <i>Flavobacteria</i>           | <i>Bacteroidetes</i>     | <i>Bacteria</i> |
| Otu0435 | 1.12                                      | 0                              | 0.38              | 0.61                  | 0.71                | 19.07                | unclass. <i>Flavobacteriales</i>    | unclass. <i>Flavobacteriales</i>      | <i>Flavobacteriales</i>                    | <i>Flavobacteria</i>           | <i>Bacteroidetes</i>     | <i>Bacteria</i> |
| Otu0004 | 0                                         | 1.09                           | 0.37              | 1.61                  | 0.7                 | 19.77                | unclass. <i>Flavobacteriales</i>    | unclass. <i>Flavobacteriales</i>      | <i>Flavobacteriales</i>                    | <i>Flavobacteria</i>           | <i>Bacteroidetes</i>     | <i>Bacteria</i> |
| Otu0463 | 1.43                                      | 1.37                           | 0.37              | 1.83                  | 0.69                | 20.47                | unclass. <i>Flavobacteriaceae</i>   | <i>Flavobacteriaceae</i>              | <i>Flavobacteriales</i>                    | <i>Flavobacteria</i>           | <i>Bacteroidetes</i>     | <i>Bacteria</i> |
| Otu0611 | 0.72                                      | 0.57                           | 0.37              | 0.81                  | 0.69                | 21.15                | unclass. <i>Bacteroidetes</i>       | unclass. <i>Bacteroidetes</i>         | unclass. <i>Bacteroidetes</i>              | unclass. <i>Bacteroidetes</i>  | <i>Bacteroidetes</i>     | <i>Bacteria</i> |
| Otu0060 | 0.35                                      | 1.08                           | 0.36              | 1.45                  | 0.67                | 21.83                | unclass. <i>Actinomycetales</i>     | unclass. <i>Actinomycetales</i>       | <i>Actinomycetales</i>                     | <i>Actinobacteria</i>          | <i>Actinobacteria</i>    | <i>Bacteria</i> |
| Otu0692 | 2.21                                      | 2.58                           | 0.36              | 1.49                  | 0.67                | 22.5                 | unclass. <i>Bacteria</i>            | unclass. <i>Bacteria</i>              | unclass. <i>Bacteria</i>                   | unclass. <i>Bacteria</i>       | unclass. <i>Bacteria</i> | <i>Bacteria</i> |
| Otu0905 | 0                                         | 1.06                           | 0.35              | 0.49                  | 0.66                | 23.16                | unclass. <i>Gammaproteobacteria</i> | unclass. <i>Gammaproteobacteria</i>   | unclass. <i>Gammaproteobacteria</i>        | <i>Gammaproteobacteria</i>     | <i>Proteobacteria</i>    | <i>Bacteria</i> |
| Otu0289 | 1.08                                      | 0.48                           | 0.35              | 1.14                  | 0.66                | 23.82                | unclass. <i>Bacteroidetes</i>       | unclass. <i>Bacteroidetes</i>         | unclass. <i>Bacteroidetes</i>              | unclass. <i>Bacteroidetes</i>  | <i>Bacteroidetes</i>     | <i>Bacteria</i> |
| Otu0068 | 1.51                                      | 0.89                           | 0.34              | 1.73                  | 0.64                | 24.47                | <i>Pelagibacter</i>                 | SAR11-clade                           | <i>Rickettsiales</i>                       | <i>Alphaproteobacteria</i>     | <i>Proteobacteria</i>    | <i>Bacteria</i> |
| Otu0480 | 0.2                                       | 0.98                           | 0.33              | 1.24                  | 0.62                | 25.09                | <i>Ilumatobacter</i>                | <i>Acidimicrobidae_incertae_sedis</i> | <i>Actinobacteria_order_incertae_sedis</i> | <i>Actinobacteria</i>          | <i>Actinobacteria</i>    | <i>Bacteria</i> |
| Otu0003 | 3.21                                      | 2.58                           | 0.33              | 1.38                  | 0.62                | 25.71                | unclass. <i>Rhodobacteraceae</i>    | <i>Rhodobacteraceae</i>               | <i>Rhodobacterales</i>                     | <i>Alphaproteobacteria</i>     | <i>Proteobacteria</i>    | <i>Bacteria</i> |
| Otu0048 | 0.63                                      | 0.8                            | 0.32              | 1.06                  | 0.6                 | 26.31                | unclass. <i>Flavobacteriaceae</i>   | <i>Flavobacteriaceae</i>              | <i>Flavobacteriales</i>                    | <i>Flavobacteria</i>           | <i>Bacteroidetes</i>     | <i>Bacteria</i> |
| Otu0461 | 1.89                                      | 1.45                           | 0.32              | 0.99                  | 0.59                | 26.9                 | unclass. <i>Microbacteriaceae</i>   | <i>Microbacteriaceae</i>              | <i>Actinomycetales</i>                     | <i>Actinobacteria</i>          | <i>Actinobacteria</i>    | <i>Bacteria</i> |
| Otu0696 | 0.68                                      | 0.77                           | 0.32              | 1.16                  | 0.59                | 27.5                 | unclass. <i>Flavobacteriaceae</i>   | <i>Flavobacteriaceae</i>              | <i>Flavobacteriales</i>                    | <i>Flavobacteria</i>           | <i>Bacteroidetes</i>     | <i>Bacteria</i> |
| Otu0261 | 0.77                                      | 0.99                           | 0.31              | 1.3                   | 0.59                | 28.08                | <i>Winogradskyella</i>              | <i>Flavobacteriaceae</i>              | <i>Flavobacteriales</i>                    | <i>Flavobacteria</i>           | <i>Bacteroidetes</i>     | <i>Bacteria</i> |
| Otu0053 | 1.29                                      | 1.25                           | 0.31              | 1.43                  | 0.58                | 28.66                | unclass. <i>Rhodobacteraceae</i>    | <i>Rhodobacteraceae</i>               | <i>Rhodobacterales</i>                     | <i>Alphaproteobacteria</i>     | <i>Proteobacteria</i>    | <i>Bacteria</i> |
| Otu0495 | 1.53                                      | 1.11                           | 0.31              | 1.24                  | 0.58                | 29.24                | unclass. <i>Flavobacteriales</i>    | unclass. <i>Flavobacteriales</i>      | <i>Flavobacteriales</i>                    | <i>Flavobacteria</i>           | <i>Bacteroidetes</i>     | <i>Bacteria</i> |
| Otu0710 | 0.48                                      | 1.31                           | 0.31              | 1.54                  | 0.57                | 29.82                | unclass. <i>Gammaproteobacteria</i> | unclass. <i>Gammaproteobacteria</i>   | unclass. <i>Gammaproteobacteria</i>        | <i>Gammaproteobacteria</i>     | <i>Proteobacteria</i>    | <i>Bacteria</i> |
| Otu0519 | 1.72                                      | 1.95                           | 0.3               | 1.22                  | 0.56                | 30.38                | unclass. <i>Rhodospirillaceae</i>   | <i>Rhodospirillaceae</i>              | <i>Rhodospirillales</i>                    | <i>Alphaproteobacteria</i>     | <i>Proteobacteria</i>    | <i>Bacteria</i> |
| Otu0186 | 0.97                                      | 0.6                            | 0.29              | 1.56                  | 0.55                | 30.93                | unclass. <i>Planctomycetaceae</i>   | <i>Planctomycetaceae</i>              | <i>Planctomycetales</i>                    | <i>Planctomycetacia</i>        | <i>Planctomycetes</i>    | <i>Bacteria</i> |

| OTU     | Av.A <sub>i</sub><br>(pH <i>in situ</i> ) | Av.A <sub>i</sub><br>(pH 7.67) | Av.δ <sub>i</sub> | Av.δ <sub>i</sub> /SD | Av.δ <sub>i</sub> % | ΣAv.δ <sub>i</sub> % | Genus                               | Family                              | Order                               | Class                          | Phylum                   | Domain          |
|---------|-------------------------------------------|--------------------------------|-------------------|-----------------------|---------------------|----------------------|-------------------------------------|-------------------------------------|-------------------------------------|--------------------------------|--------------------------|-----------------|
| Otu0701 | 0.88                                      | 0.2                            | 0.29              | 1.09                  | 0.55                | 31.48                | unclass. <i>Bacteria</i>            | unclass. <i>Bacteria</i>            | unclass. <i>Bacteria</i>            | unclass. <i>Bacteria</i>       | unclass. <i>Bacteria</i> | <i>Bacteria</i> |
| Otu0468 | 0.57                                      | 0.88                           | 0.29              | 1.12                  | 0.55                | 32.03                | unclass. <i>Flavobacteriaceae</i>   | <i>Flavobacteriaceae</i>            | <i>Flavobacteriales</i>             | <i>Flavobacteria</i>           | <i>Bacteroidetes</i>     | <i>Bacteria</i> |
| Otu0490 | 0.4                                       | 0.91                           | 0.29              | 1.29                  | 0.54                | 32.57                | unclass. <i>Burkholderiales</i>     | unclass. <i>Burkholderiales</i>     | <i>Burkholderiales</i>              | <i>Betaproteobacteria</i>      | <i>Proteobacteria</i>    | <i>Bacteria</i> |
| Otu0697 | 0.6                                       | 0.69                           | 0.28              | 1.47                  | 0.53                | 33.1                 | unclass. <i>Flavobacteriaceae</i>   | <i>Flavobacteriaceae</i>            | <i>Flavobacteriales</i>             | <i>Flavobacteria</i>           | <i>Bacteroidetes</i>     | <i>Bacteria</i> |
| Otu0052 | 2.91                                      | 2.27                           | 0.27              | 1.17                  | 0.51                | 33.6                 | unclass. <i>Betaproteobacteria</i>  | unclass. <i>Betaproteobacteria</i>  | unclass. <i>Betaproteobacteria</i>  | <i>Betaproteobacteria</i>      | <i>Proteobacteria</i>    | <i>Bacteria</i> |
| Otu0031 | 0.35                                      | 0.75                           | 0.27              | 1.15                  | 0.51                | 34.11                | unclass. <i>Gammaproteobacteria</i> | unclass. <i>Gammaproteobacteria</i> | unclass. <i>Gammaproteobacteria</i> | <i>Gammaproteobacteria</i>     | <i>Proteobacteria</i>    | <i>Bacteria</i> |
| Otu0708 | 0                                         | 0.8                            | 0.27              | 1.94                  | 0.51                | 34.62                | unclass. <i>Proteobacteria</i>      | unclass. <i>Proteobacteria</i>      | unclass. <i>Proteobacteria</i>      | unclass. <i>Proteobacteria</i> | <i>Proteobacteria</i>    | <i>Bacteria</i> |
| Otu0245 | 0.97                                      | 0.98                           | 0.27              | 1.35                  | 0.51                | 35.13                | unclass. <i>Flavobacteriales</i>    | unclass. <i>Flavobacteriales</i>    | <i>Flavobacteriales</i>             | <i>Flavobacteria</i>           | <i>Bacteroidetes</i>     | <i>Bacteria</i> |
| Otu0947 | 0                                         | 0.72                           | 0.27              | 0.49                  | 0.5                 | 35.63                | unclass. <i>Bacteroidetes</i>       | unclass. <i>Bacteroidetes</i>       | unclass. <i>Bacteroidetes</i>       | unclass. <i>Bacteroidetes</i>  | <i>Bacteroidetes</i>     | <i>Bacteria</i> |
| Otu0759 | 0.28                                      | 0.77                           | 0.25              | 1.11                  | 0.48                | 36.1                 | unclass. <i>Verrucomicrobiaceae</i> | <i>Verrucomicrobiaceae</i>          | <i>Verrucomicrobiales</i>           | <i>Verrucomicrobiae</i>        | <i>Verrucomicrobia</i>   | <i>Bacteria</i> |
| Otu0703 | 1.03                                      | 0.75                           | 0.25              | 1.2                   | 0.47                | 36.57                | unclass. <i>Gammaproteobacteria</i> | unclass. <i>Gammaproteobacteria</i> | unclass. <i>Gammaproteobacteria</i> | <i>Gammaproteobacteria</i>     | <i>Proteobacteria</i>    | <i>Bacteria</i> |
| Otu0046 | 1.29                                      | 1.44                           | 0.25              | 0.96                  | 0.47                | 37.05                | unclass. <i>Flavobacteriaceae</i>   | <i>Flavobacteriaceae</i>            | <i>Flavobacteriales</i>             | <i>Flavobacteria</i>           | <i>Bacteroidetes</i>     | <i>Bacteria</i> |
| Otu0142 | 0.68                                      | 0.83                           | 0.25              | 1.23                  | 0.47                | 37.51                | unclass. <i>Gammaproteobacteria</i> | unclass. <i>Gammaproteobacteria</i> | unclass. <i>Gammaproteobacteria</i> | <i>Gammaproteobacteria</i>     | <i>Proteobacteria</i>    | <i>Bacteria</i> |
| Otu0510 | 0.2                                       | 0.77                           | 0.25              | 1.15                  | 0.47                | 37.98                | unclass. <i>Gammaproteobacteria</i> | unclass. <i>Gammaproteobacteria</i> | unclass. <i>Gammaproteobacteria</i> | <i>Gammaproteobacteria</i>     | <i>Proteobacteria</i>    | <i>Bacteria</i> |
| Otu0019 | 1.33                                      | 0.6                            | 0.25              | 0.86                  | 0.47                | 38.45                | unclass. <i>Gammaproteobacteria</i> | unclass. <i>Gammaproteobacteria</i> | unclass. <i>Gammaproteobacteria</i> | <i>Gammaproteobacteria</i>     | <i>Proteobacteria</i>    | <i>Bacteria</i> |
| Otu0502 | 1.03                                      | 1.13                           | 0.25              | 1.19                  | 0.46                | 38.91                | unclass. <i>Gammaproteobacteria</i> | unclass. <i>Gammaproteobacteria</i> | unclass. <i>Gammaproteobacteria</i> | <i>Gammaproteobacteria</i>     | <i>Proteobacteria</i>    | <i>Bacteria</i> |
| Otu0061 | 0.2                                       | 0.65                           | 0.25              | 0.8                   | 0.46                | 39.37                | unclass. <i>Actinomycetales</i>     | unclass. <i>Actinomycetales</i>     | <i>Actinomycetales</i>              | <i>Actinobacteria</i>          | <i>Actinobacteria</i>    | <i>Bacteria</i> |
| Otu0737 | 0.63                                      | 0.48                           | 0.24              | 1.03                  | 0.46                | 39.83                | unclass. <i>Gammaproteobacteria</i> | unclass. <i>Gammaproteobacteria</i> | unclass. <i>Gammaproteobacteria</i> | <i>Gammaproteobacteria</i>     | <i>Proteobacteria</i>    | <i>Bacteria</i> |
| Otu0694 | 0.75                                      | 0.2                            | 0.24              | 1.07                  | 0.46                | 40.29                | unclass. <i>Alphaproteobacteria</i> | unclass. <i>Alphaproteobacteria</i> | unclass. <i>Alphaproteobacteria</i> | <i>Alphaproteobacteria</i>     | <i>Proteobacteria</i>    | <i>Bacteria</i> |
| Otu0752 | 0.2                                       | 0.8                            | 0.24              | 1.42                  | 0.45                | 40.74                | unclass. <i>Gammaproteobacteria</i> | unclass. <i>Gammaproteobacteria</i> | unclass. <i>Gammaproteobacteria</i> | <i>Gammaproteobacteria</i>     | <i>Proteobacteria</i>    | <i>Bacteria</i> |
| Otu0768 | 0.6                                       | 0.35                           | 0.24              | 1.28                  | 0.45                | 41.19                | unclass. <i>Flavobacteriales</i>    | unclass. <i>Flavobacteriales</i>    | <i>Flavobacteriales</i>             | <i>Flavobacteria</i>           | <i>Bacteroidetes</i>     | <i>Bacteria</i> |
| Otu0408 | 0.75                                      | 0.2                            | 0.24              | 1.11                  | 0.45                | 41.64                | unclass. <i>Flavobacteriaceae</i>   | <i>Flavobacteriaceae</i>            | <i>Flavobacteriales</i>             | <i>Flavobacteria</i>           | <i>Bacteroidetes</i>     | <i>Bacteria</i> |
| Otu0532 | 0.77                                      | 0.4                            | 0.24              | 1.19                  | 0.44                | 42.08                | unclass. <i>Rhodobacteraceae</i>    | <i>Rhodobacteraceae</i>             | <i>Rhodobacterales</i>              | <i>Alphaproteobacteria</i>     | <i>Proteobacteria</i>    | <i>Bacteria</i> |
| Otu0503 | 1.15                                      | 1.41                           | 0.24              | 1.24                  | 0.44                | 42.52                | unclass. <i>Bacteroidetes</i>       | unclass. <i>Bacteroidetes</i>       | unclass. <i>Bacteroidetes</i>       | unclass. <i>Bacteroidetes</i>  | <i>Bacteroidetes</i>     | <i>Bacteria</i> |
| Otu0272 | 0.6                                       | 0.57                           | 0.24              | 1.32                  | 0.44                | 42.97                | unclass. <i>Flavobacteriaceae</i>   | <i>Flavobacteriaceae</i>            | <i>Flavobacteriales</i>             | <i>Flavobacteria</i>           | <i>Bacteroidetes</i>     | <i>Bacteria</i> |
| Otu0380 | 0.35                                      | 0.57                           | 0.23              | 0.91                  | 0.44                | 43.4                 | unclass. <i>Proteobacteria</i>      | unclass. <i>Proteobacteria</i>      | unclass. <i>Proteobacteria</i>      | unclass. <i>Proteobacteria</i> | <i>Proteobacteria</i>    | <i>Bacteria</i> |
| Otu0475 | 0                                         | 0.68                           | 0.23              | 1.18                  | 0.43                | 43.83                | unclass. <i>Microbacteriaceae</i>   | <i>Microbacteriaceae</i>            | <i>Actinomycetales</i>              | <i>Actinobacteria</i>          | <i>Actinobacteria</i>    | <i>Bacteria</i> |

| OTU     | Av.A <sub>i</sub><br>(pH <i>in situ</i> ) | Av.A <sub>i</sub><br>(pH 7.67) | Av.δ <sub>i</sub> | Av.δ <sub>i</sub> /SD | Av.δ <sub>i</sub> % | ΣAv.δ <sub>i</sub> % | Genus                               | Family                              | Order                               | Class                          | Phylum                   | Domain          |
|---------|-------------------------------------------|--------------------------------|-------------------|-----------------------|---------------------|----------------------|-------------------------------------|-------------------------------------|-------------------------------------|--------------------------------|--------------------------|-----------------|
| Otu0782 | 0.68                                      | 0.77                           | 0.23              | 1.14                  | 0.43                | 44.26                | unclass. <i>Gammaproteobacteria</i> | unclass. <i>Gammaproteobacteria</i> | unclass. <i>Gammaproteobacteria</i> | <i>Gammaproteobacteria</i>     | <i>Proteobacteria</i>    | <i>Bacteria</i> |
| Otu0714 | 0.68                                      | 0.48                           | 0.23              | 1.13                  | 0.43                | 44.69                | unclass. <i>Alphaproteobacteria</i> | unclass. <i>Alphaproteobacteria</i> | unclass. <i>Alphaproteobacteria</i> | <i>Alphaproteobacteria</i>     | <i>Proteobacteria</i>    | <i>Bacteria</i> |
| Otu0041 | 0.75                                      | 0.4                            | 0.23              | 1.1                   | 0.42                | 45.11                | <i>Sulfitobacter</i>                | <i>Rhodobacteraceae</i>             | <i>Rhodobacterales</i>              | <i>Alphaproteobacteria</i>     | <i>Proteobacteria</i>    | <i>Bacteria</i> |
| Otu0020 | 0.63                                      | 0.2                            | 0.23              | 0.92                  | 0.42                | 45.54                | unclass. <i>Flammeovirgaceae</i>    | <i>Flammeovirgaceae</i>             | <i>Sphingobacteriales</i>           | <i>Sphingobacteria</i>         | <i>Bacteroidetes</i>     | <i>Bacteria</i> |
| Otu0473 | 1.63                                      | 1.46                           | 0.23              | 1.09                  | 0.42                | 45.96                | unclass. <i>Alphaproteobacteria</i> | unclass. <i>Alphaproteobacteria</i> | unclass. <i>Alphaproteobacteria</i> | <i>Alphaproteobacteria</i>     | <i>Proteobacteria</i>    | <i>Bacteria</i> |
| Otu0221 | 0.48                                      | 0.57                           | 0.22              | 0.99                  | 0.42                | 46.38                | unclass. <i>Flavobacteriaceae</i>   | <i>Flavobacteriaceae</i>            | <i>Flavobacteriales</i>             | <i>Flavobacteria</i>           | <i>Bacteroidetes</i>     | <i>Bacteria</i> |
| Otu0732 | 0.48                                      | 0.35                           | 0.22              | 0.89                  | 0.41                | 46.79                | unclass. <i>Proteobacteria</i>      | unclass. <i>Proteobacteria</i>      | unclass. <i>Proteobacteria</i>      | unclass. <i>Proteobacteria</i> | <i>Proteobacteria</i>    | <i>Bacteria</i> |
| Otu0368 | 0.6                                       | 0.28                           | 0.22              | 1.25                  | 0.41                | 47.2                 | unclass. <i>Saprospiraceae</i>      | <i>Saprospiraceae</i>               | <i>Sphingobacteriales</i>           | <i>Sphingobacteria</i>         | <i>Bacteroidetes</i>     | <i>Bacteria</i> |
| Otu0781 | 0.63                                      | 0                              | 0.22              | 0.49                  | 0.41                | 47.61                | unclass. <i>Thiotrichales</i>       | unclass. <i>Thiotrichales</i>       | <i>Thiotrichales</i>                | <i>Gammaproteobacteria</i>     | <i>Proteobacteria</i>    | <i>Bacteria</i> |
| Otu0347 | 0                                         | 0.6                            | 0.22              | 1.19                  | 0.4                 | 48.02                | unclass. <i>Flavobacteriaceae</i>   | <i>Flavobacteriaceae</i>            | <i>Flavobacteriales</i>             | <i>Flavobacteria</i>           | <i>Bacteroidetes</i>     | <i>Bacteria</i> |
| Otu0875 | 0                                         | 0.6                            | 0.21              | 1.19                  | 0.4                 | 48.42                | unclass. <i>Flavobacteriales</i>    | unclass. <i>Flavobacteriales</i>    | <i>Flavobacteriales</i>             | <i>Flavobacteria</i>           | <i>Bacteroidetes</i>     | <i>Bacteria</i> |
| Otu0467 | 0.4                                       | 0.55                           | 0.21              | 1                     | 0.4                 | 48.81                | unclass. <i>Rhodospirillaceae</i>   | <i>Rhodospirillaceae</i>            | <i>Rhodospirillales</i>             | <i>Alphaproteobacteria</i>     | <i>Proteobacteria</i>    | <i>Bacteria</i> |
| Otu0504 | 0.68                                      | 0.4                            | 0.21              | 1.09                  | 0.39                | 49.2                 | unclass. <i>Alphaproteobacteria</i> | unclass. <i>Alphaproteobacteria</i> | unclass. <i>Alphaproteobacteria</i> | <i>Alphaproteobacteria</i>     | <i>Proteobacteria</i>    | <i>Bacteria</i> |
| Otu0497 | 0.48                                      | 0.6                            | 0.21              | 1.17                  | 0.39                | 49.6                 | <i>Opitutus</i>                     | <i>Opitutaceae</i>                  | <i>Opitutales</i>                   | <i>Opitutae</i>                | <i>Verrucomicrobia</i>   | <i>Bacteria</i> |
| Otu0505 | 0.63                                      | 0                              | 0.21              | 0.8                   | 0.39                | 49.99                | unclass. <i>Chitinophagaceae</i>    | <i>Chitinophagaceae</i>             | <i>Sphingobacteriales</i>           | <i>Sphingobacteria</i>         | <i>Bacteroidetes</i>     | <i>Bacteria</i> |
| Otu0803 | 0.2                                       | 0.55                           | 0.21              | 0.85                  | 0.39                | 50.38                | unclass. <i>Cryomorphaceae</i>      | <i>Cryomorphaceae</i>               | <i>Flavobacteriales</i>             | <i>Flavobacteria</i>           | <i>Bacteroidetes</i>     | <i>Bacteria</i> |
| Otu0700 | 0.68                                      | 0.4                            | 0.21              | 1.1                   | 0.39                | 50.76                | unclass. <i>Alphaproteobacteria</i> | unclass. <i>Alphaproteobacteria</i> | unclass. <i>Alphaproteobacteria</i> | <i>Alphaproteobacteria</i>     | <i>Proteobacteria</i>    | <i>Bacteria</i> |
| Otu0191 | 0.6                                       | 0                              | 0.2               | 1.19                  | 0.38                | 51.15                | unclass. <i>Proteobacteria</i>      | unclass. <i>Proteobacteria</i>      | unclass. <i>Proteobacteria</i>      | unclass. <i>Proteobacteria</i> | <i>Proteobacteria</i>    | <i>Bacteria</i> |
| Otu0721 | 0.6                                       | 0                              | 0.2               | 1.19                  | 0.38                | 51.52                | unclass. <i>Alphaproteobacteria</i> | unclass. <i>Alphaproteobacteria</i> | unclass. <i>Alphaproteobacteria</i> | <i>Alphaproteobacteria</i>     | <i>Proteobacteria</i>    | <i>Bacteria</i> |
| Otu0075 | 0.28                                      | 0.48                           | 0.2               | 0.87                  | 0.38                | 51.9                 | unclass. <i>Alphaproteobacteria</i> | unclass. <i>Alphaproteobacteria</i> | unclass. <i>Alphaproteobacteria</i> | <i>Alphaproteobacteria</i>     | <i>Proteobacteria</i>    | <i>Bacteria</i> |
| Otu0706 | 1.99                                      | 1.88                           | 0.2               | 1.33                  | 0.38                | 52.28                | unclass. <i>Planctomycetaceae</i>   | <i>Planctomycetaceae</i>            | <i>Planctomycetales</i>             | <i>Planctomycetacia</i>        | <i>Planctomycetes</i>    | <i>Bacteria</i> |
| Otu0521 | 1.08                                      | 0.77                           | 0.2               | 1.24                  | 0.37                | 52.65                | unclass. <i>Rhodobacteraceae</i>    | <i>Rhodobacteraceae</i>             | <i>Rhodobacterales</i>              | <i>Alphaproteobacteria</i>     | <i>Proteobacteria</i>    | <i>Bacteria</i> |
| Otu0754 | 0.48                                      | 0.28                           | 0.2               | 0.88                  | 0.37                | 53.02                | unclass. <i>Flavobacteriales</i>    | unclass. <i>Flavobacteriales</i>    | <i>Flavobacteriales</i>             | <i>Flavobacteria</i>           | <i>Bacteroidetes</i>     | <i>Bacteria</i> |
| Otu0833 | 0                                         | 0.6                            | 0.2               | 1.2                   | 0.37                | 53.39                | <i>Alcanivorax</i>                  | <i>Alcanivoracaceae</i>             | <i>Oceanospirillales</i>            | <i>Gammaproteobacteria</i>     | <i>Proteobacteria</i>    | <i>Bacteria</i> |
| Otu0630 | 0.35                                      | 0.4                            | 0.19              | 0.93                  | 0.36                | 53.75                | unclass. <i>Flavobacteriales</i>    | unclass. <i>Flavobacteriales</i>    | <i>Flavobacteriales</i>             | <i>Flavobacteria</i>           | <i>Bacteroidetes</i>     | <i>Bacteria</i> |
| Otu0758 | 0.48                                      | 0.4                            | 0.19              | 1.01                  | 0.36                | 54.11                | unclass. <i>Bacteria</i>            | unclass. <i>Bacteria</i>            | unclass. <i>Bacteria</i>            | unclass. <i>Bacteria</i>       | unclass. <i>Bacteria</i> | <i>Bacteria</i> |
| Otu0218 | 0.48                                      | 0.4                            | 0.19              | 1.01                  | 0.36                | 54.47                | unclass. <i>Flavobacteriaceae</i>   | <i>Flavobacteriaceae</i>            | <i>Flavobacteriales</i>             | <i>Flavobacteria</i>           | <i>Bacteroidetes</i>     | <i>Bacteria</i> |

| OTU     | Av.A <sub>i</sub><br>(pH <i>in situ</i> ) | Av.A <sub>i</sub><br>(pH 7.67) | Av.δ <sub>i</sub> | Av.δ <sub>i</sub> /SD | Av.δ <sub>i</sub> % | ΣAv.δ <sub>i</sub> % | Genus                               | Family                              | Order                               | Class                          | Phylum                   | Domain          |
|---------|-------------------------------------------|--------------------------------|-------------------|-----------------------|---------------------|----------------------|-------------------------------------|-------------------------------------|-------------------------------------|--------------------------------|--------------------------|-----------------|
| Otu0470 | 0.4                                       | 0.48                           | 0.19              | 1.01                  | 0.35                | 54.82                | unclass. <i>Flavobacteriaceae</i>   | <i>Flavobacteriaceae</i>            | <i>Flavobacteriales</i>             | <i>Flavobacteria</i>           | <i>Bacteroidetes</i>     | <i>Bacteria</i> |
| Otu0354 | 1.11                                      | 1.38                           | 0.19              | 1.03                  | 0.35                | 55.18                | <i>Andersenella</i>                 | <i>Rhodobiaceae</i>                 | <i>Rhizobiales</i>                  | <i>Alphaproteobacteria</i>     | <i>Proteobacteria</i>    | <i>Bacteria</i> |
| Otu0711 | 0                                         | 0.55                           | 0.18              | 0.78                  | 0.34                | 55.52                | unclass. <i>Gammaproteobacteria</i> | unclass. <i>Gammaproteobacteria</i> | unclass. <i>Gammaproteobacteria</i> | <i>Gammaproteobacteria</i>     | <i>Proteobacteria</i>    | <i>Bacteria</i> |
| Otu0230 | 0.2                                       | 0.48                           | 0.18              | 0.89                  | 0.34                | 55.86                | unclass. <i>Rhodobacteraceae</i>    | <i>Rhodobacteraceae</i>             | <i>Rhodobacterales</i>              | <i>Alphaproteobacteria</i>     | <i>Proteobacteria</i>    | <i>Bacteria</i> |
| Otu0485 | 0.6                                       | 0.4                            | 0.18              | 1.01                  | 0.34                | 56.2                 | unclass. <i>Alphaproteobacteria</i> | unclass. <i>Alphaproteobacteria</i> | unclass. <i>Alphaproteobacteria</i> | <i>Alphaproteobacteria</i>     | <i>Proteobacteria</i>    | <i>Bacteria</i> |
| Otu0731 | 0.2                                       | 0.48                           | 0.18              | 0.9                   | 0.33                | 56.54                | <i>Lentisphaera</i>                 | <i>Lentisphaeraceae</i>             | <i>Lentisphaerales</i>              | <i>Lentisphaeria</i>           | <i>Lentisphaerae</i>     | <i>Bacteria</i> |
| Otu0476 | 0.6                                       | 0.4                            | 0.18              | 1.01                  | 0.33                | 56.87                | unclass. <i>Actinomycetales</i>     | unclass. <i>Actinomycetales</i>     | <i>Actinomycetales</i>              | <i>Actinobacteria</i>          | <i>Actinobacteria</i>    | <i>Bacteria</i> |
| Otu0798 | 0.48                                      | 0.2                            | 0.18              | 0.88                  | 0.33                | 57.2                 | unclass. <i>Gammaproteobacteria</i> | unclass. <i>Gammaproteobacteria</i> | unclass. <i>Gammaproteobacteria</i> | <i>Gammaproteobacteria</i>     | <i>Proteobacteria</i>    | <i>Bacteria</i> |
| Otu0822 | 0.28                                      | 0.4                            | 0.18              | 0.91                  | 0.33                | 57.53                | unclass. <i>Proteobacteria</i>      | unclass. <i>Proteobacteria</i>      | unclass. <i>Proteobacteria</i>      | unclass. <i>Proteobacteria</i> | <i>Proteobacteria</i>    | <i>Bacteria</i> |
| Otu0704 | 0.97                                      | 0.88                           | 0.17              | 0.97                  | 0.33                | 57.86                | unclass. <i>Proteobacteria</i>      | unclass. <i>Proteobacteria</i>      | unclass. <i>Proteobacteria</i>      | unclass. <i>Proteobacteria</i> | <i>Proteobacteria</i>    | <i>Bacteria</i> |
| Otu0156 | 0.2                                       | 0.48                           | 0.17              | 0.89                  | 0.32                | 58.18                | unclass. <i>Gammaproteobacteria</i> | unclass. <i>Gammaproteobacteria</i> | unclass. <i>Gammaproteobacteria</i> | <i>Gammaproteobacteria</i>     | <i>Proteobacteria</i>    | <i>Bacteria</i> |
| Otu0080 | 0.48                                      | 0                              | 0.17              | 0.77                  | 0.32                | 58.5                 | <i>Polaribacter</i>                 | <i>Flavobacteriaceae</i>            | <i>Flavobacteriales</i>             | <i>Flavobacteria</i>           | <i>Bacteroidetes</i>     | <i>Bacteria</i> |
| Otu0216 | 0.4                                       | 0.4                            | 0.17              | 0.93                  | 0.31                | 58.81                | <i>Pelagibacter</i>                 | SAR11-clade                         | <i>Rickettsiales</i>                | <i>Alphaproteobacteria</i>     | <i>Proteobacteria</i>    | <i>Bacteria</i> |
| Otu0148 | 0                                         | 0.48                           | 0.16              | 0.79                  | 0.31                | 59.12                | unclass. <i>Sphingobacteriales</i>  | unclass. <i>Sphingobacteriales</i>  | <i>Sphingobacteriales</i>           | <i>Sphingobacteria</i>         | <i>Bacteroidetes</i>     | <i>Bacteria</i> |
| Otu0728 | 0.2                                       | 0.4                            | 0.16              | 0.87                  | 0.3                 | 59.42                | unclass. <i>Gammaproteobacteria</i> | unclass. <i>Gammaproteobacteria</i> | unclass. <i>Gammaproteobacteria</i> | <i>Gammaproteobacteria</i>     | <i>Proteobacteria</i>    | <i>Bacteria</i> |
| Otu0022 | 0                                         | 0.48                           | 0.16              | 0.77                  | 0.3                 | 59.71                | unclass. <i>Betaproteobacteria</i>  | unclass. <i>Betaproteobacteria</i>  | unclass. <i>Betaproteobacteria</i>  | <i>Betaproteobacteria</i>      | <i>Proteobacteria</i>    | <i>Bacteria</i> |
| Otu0840 | 0.49                                      | 0                              | 0.16              | 0.49                  | 0.29                | 60                   | unclass. <i>Flavobacteriaceae</i>   | <i>Flavobacteriaceae</i>            | <i>Flavobacteriales</i>             | <i>Flavobacteria</i>           | <i>Bacteroidetes</i>     | <i>Bacteria</i> |
| Otu0259 | 0                                         | 0.48                           | 0.16              | 0.79                  | 0.29                | 60.3                 | <i>Haliscomenobacter</i>            | <i>Saprospiraceae</i>               | <i>Sphingobacteriales</i>           | <i>Sphingobacteria</i>         | <i>Bacteroidetes</i>     | <i>Bacteria</i> |
| Otu0724 | 0.4                                       | 0.2                            | 0.15              | 0.87                  | 0.29                | 60.59                | unclass. <i>Bacteria</i>            | unclass. <i>Bacteria</i>            | unclass. <i>Bacteria</i>            | unclass. <i>Bacteria</i>       | unclass. <i>Bacteria</i> | <i>Bacteria</i> |
| Otu0595 | 0.4                                       | 0.2                            | 0.15              | 0.87                  | 0.29                | 60.88                | unclass. <i>Legionellaceae</i>      | <i>Legionellaceae</i>               | <i>Legionellales</i>                | <i>Gammaproteobacteria</i>     | <i>Proteobacteria</i>    | <i>Bacteria</i> |
| Otu0038 | 0.4                                       | 0.2                            | 0.15              | 0.86                  | 0.29                | 61.16                | unclass. <i>Proteobacteria</i>      | unclass. <i>Proteobacteria</i>      | unclass. <i>Proteobacteria</i>      | unclass. <i>Proteobacteria</i> | <i>Proteobacteria</i>    | <i>Bacteria</i> |
| Otu0482 | 0.2                                       | 0.4                            | 0.15              | 0.87                  | 0.29                | 61.45                | unclass. <i>Microbacteriaceae</i>   | <i>Microbacteriaceae</i>            | <i>Actinomycetales</i>              | <i>Actinobacteria</i>          | <i>Actinobacteria</i>    | <i>Bacteria</i> |
| Otu0735 | 0.4                                       | 0.2                            | 0.15              | 0.86                  | 0.29                | 61.74                | unclass. <i>Gammaproteobacteria</i> | unclass. <i>Gammaproteobacteria</i> | unclass. <i>Gammaproteobacteria</i> | <i>Gammaproteobacteria</i>     | <i>Proteobacteria</i>    | <i>Bacteria</i> |
| Otu0174 | 0.2                                       | 0.4                            | 0.15              | 0.86                  | 0.28                | 62.03                | unclass. <i>Flavobacteriaceae</i>   | <i>Flavobacteriaceae</i>            | <i>Flavobacteriales</i>             | <i>Flavobacteria</i>           | <i>Bacteroidetes</i>     | <i>Bacteria</i> |
| Otu0454 | 0.2                                       | 0.4                            | 0.15              | 0.86                  | 0.28                | 62.31                | unclass. <i>Actinobacteria</i>      | unclass. <i>Actinobacteria</i>      | unclass. <i>Actinobacteria</i>      | <i>Actinobacteria</i>          | <i>Actinobacteria</i>    | <i>Bacteria</i> |
| Otu0012 | 0.2                                       | 0.4                            | 0.15              | 0.86                  | 0.28                | 62.59                | unclass. <i>Comamonadaceae</i>      | <i>Comamonadaceae</i>               | <i>Burkholderiales</i>              | <i>Betaproteobacteria</i>      | <i>Proteobacteria</i>    | <i>Bacteria</i> |
| Otu0464 | 0.2                                       | 0.4                            | 0.15              | 0.86                  | 0.28                | 62.87                | unclass. <i>Bacteroidetes</i>       | unclass. <i>Bacteroidetes</i>       | unclass. <i>Bacteroidetes</i>       | unclass. <i>Bacteroidetes</i>  | <i>Bacteroidetes</i>     | <i>Bacteria</i> |

| OTU     | Av.A <sub>i</sub><br>(pH <i>in situ</i> ) | Av.A <sub>i</sub><br>(pH 7.67) | Av.δ <sub>i</sub> | Av.δ <sub>i</sub> /SD | Av.δ <sub>i</sub> % | ΣAv.δ <sub>i</sub> % | Genus                               | Family                               | Order                                      | Class                           | Phylum                   | Domain          |
|---------|-------------------------------------------|--------------------------------|-------------------|-----------------------|---------------------|----------------------|-------------------------------------|--------------------------------------|--------------------------------------------|---------------------------------|--------------------------|-----------------|
| Otu0787 | 0.4                                       | 0.2                            | 0.15              | 0.87                  | 0.28                | 63.15                | unclass. <i>Verrucomicrobia</i>     | unclass. <i>Verrucomicrobia</i>      | unclass. <i>Verrucomicrobia</i>            | unclass. <i>Verrucomicrobia</i> | <i>Verrucomicrobia</i>   | <i>Bacteria</i> |
| Otu0666 | 0.2                                       | 0.28                           | 0.15              | 0.69                  | 0.27                | 63.42                | unclass. <i>Deltaproteobacteria</i> | unclass. <i>Deltaproteobacteria</i>  | unclass. <i>Deltaproteobacteria</i>        | <i>Deltaproteobacteria</i>      | <i>Proteobacteria</i>    | <i>Bacteria</i> |
| Otu0867 | 0                                         | 0.45                           | 0.14              | 0.49                  | 0.27                | 63.69                | unclass. <i>Proteobacteria</i>      | unclass. <i>Proteobacteria</i>       | unclass. <i>Proteobacteria</i>             | unclass. <i>Proteobacteria</i>  | <i>Proteobacteria</i>    | <i>Bacteria</i> |
| Otu0745 | 0.4                                       | 0                              | 0.14              | 0.8                   | 0.26                | 63.95                | <i>Planctomyces</i>                 | <i>Planctomycetaceae</i>             | <i>Planctomycetales</i>                    | <i>Planctomycetacia</i>         | <i>Planctomycetes</i>    | <i>Bacteria</i> |
| Otu0746 | 0.4                                       | 0                              | 0.14              | 0.8                   | 0.26                | 64.21                | unclass. <i>Flavobacteriaceae</i>   | <i>Flavobacteriaceae</i>             | <i>Flavobacteriales</i>                    | <i>Flavobacteria</i>            | <i>Bacteroidetes</i>     | <i>Bacteria</i> |
| Otu0202 | 0.4                                       | 0                              | 0.14              | 0.8                   | 0.26                | 64.48                | unclass. <i>Alteromonadaceae</i>    | <i>Alteromonadaceae</i>              | <i>Alteromonadales</i>                     | <i>Gammaproteobacteria</i>      | <i>Proteobacteria</i>    | <i>Bacteria</i> |
| Otu0051 | 0.4                                       | 0                              | 0.14              | 0.8                   | 0.26                | 64.74                | unclass. <i>Flavobacteriaceae</i>   | <i>Flavobacteriaceae</i>             | <i>Flavobacteriales</i>                    | <i>Flavobacteria</i>            | <i>Bacteroidetes</i>     | <i>Bacteria</i> |
| Otu0460 | 0.28                                      | 0.2                            | 0.14              | 0.68                  | 0.26                | 65                   | <i>Arcobacter</i>                   | <i>Campylobacteraceae</i>            | <i>Campylobacterales</i>                   | <i>Epsilonproteobacteria</i>    | <i>Proteobacteria</i>    | <i>Bacteria</i> |
| Otu0783 | 0.4                                       | 0                              | 0.14              | 0.49                  | 0.26                | 65.26                | unclass. <i>Gammaproteobacteria</i> | unclass. <i>Gammaproteobacteria</i>  | unclass. <i>Gammaproteobacteria</i>        | <i>Gammaproteobacteria</i>      | <i>Proteobacteria</i>    | <i>Bacteria</i> |
| Otu0462 | 0                                         | 0.4                            | 0.14              | 0.79                  | 0.26                | 65.52                | <i>Haliea</i>                       | <i>Alteromonadaceae</i>              | <i>Alteromonadales</i>                     | <i>Gammaproteobacteria</i>      | <i>Proteobacteria</i>    | <i>Bacteria</i> |
| Otu0555 | 0.2                                       | 0.28                           | 0.14              | 0.69                  | 0.26                | 65.78                | <i>Maricaulis</i>                   | <i>Hyphomonadaceae</i>               | <i>Caulobacterales</i>                     | <i>Alphaproteobacteria</i>      | <i>Proteobacteria</i>    | <i>Bacteria</i> |
| Otu0727 | 0.4                                       | 0                              | 0.14              | 0.8                   | 0.25                | 66.03                | unclass. <i>Deltaproteobacteria</i> | unclass. <i>Deltaproteobacteria</i>  | unclass. <i>Deltaproteobacteria</i>        | <i>Deltaproteobacteria</i>      | <i>Proteobacteria</i>    | <i>Bacteria</i> |
| Otu0472 | 0.4                                       | 0                              | 0.14              | 0.8                   | 0.25                | 66.29                | unclass. <i>Bacteroidetes</i>       | unclass. <i>Bacteroidetes</i>        | unclass. <i>Bacteroidetes</i>              | unclass. <i>Bacteroidetes</i>   | <i>Bacteroidetes</i>     | <i>Bacteria</i> |
| Otu0766 | 0.4                                       | 0                              | 0.14              | 0.8                   | 0.25                | 66.54                | <i>Lentisphaera</i>                 | <i>Lentisphaeraceae</i>              | <i>Lentisphaerales</i>                     | <i>Lentisphaeria</i>            | <i>Lentisphaerae</i>     | <i>Bacteria</i> |
| Otu0774 | 0.4                                       | 0                              | 0.14              | 0.8                   | 0.25                | 66.79                | unclass. <i>Bacteria</i>            | unclass. <i>Bacteria</i>             | unclass. <i>Bacteria</i>                   | unclass. <i>Bacteria</i>        | unclass. <i>Bacteria</i> | <i>Bacteria</i> |
| Otu0477 | 0                                         | 0.4                            | 0.13              | 0.8                   | 0.25                | 67.04                | <i>Ilumatobacter</i>                | <i>Acidimicrobiae_incertae_sedis</i> | <i>Actinobacteria_order_incertae_sedis</i> | <i>Actinobacteria</i>           | <i>Actinobacteria</i>    | <i>Bacteria</i> |
| Otu0716 | 0                                         | 0.4                            | 0.13              | 0.8                   | 0.25                | 67.29                | unclass. <i>Bacteroidetes</i>       | unclass. <i>Bacteroidetes</i>        | unclass. <i>Bacteroidetes</i>              | unclass. <i>Bacteroidetes</i>   | <i>Bacteroidetes</i>     | <i>Bacteria</i> |
| Otu0862 | 0.2                                       | 0.28                           | 0.13              | 0.69                  | 0.25                | 67.54                | unclass. <i>Gammaproteobacteria</i> | unclass. <i>Gammaproteobacteria</i>  | unclass. <i>Gammaproteobacteria</i>        | <i>Gammaproteobacteria</i>      | <i>Proteobacteria</i>    | <i>Bacteria</i> |
| Otu0911 | 0                                         | 0.4                            | 0.13              | 0.49                  | 0.25                | 67.79                | unclass. <i>Bacteroidetes</i>       | unclass. <i>Bacteroidetes</i>        | unclass. <i>Bacteroidetes</i>              | unclass. <i>Bacteroidetes</i>   | <i>Bacteroidetes</i>     | <i>Bacteria</i> |
| Otu0541 | 0.4                                       | 0                              | 0.13              | 0.8                   | 0.25                | 68.04                | unclass. <i>Rhodobacteraceae</i>    | <i>Rhodobacteraceae</i>              | <i>Rhodobacterales</i>                     | <i>Alphaproteobacteria</i>      | <i>Proteobacteria</i>    | <i>Bacteria</i> |
| Otu0736 | 0.4                                       | 0                              | 0.13              | 0.8                   | 0.25                | 68.29                | <i>Persicirhabdus</i>               | <i>Verrucomicrobiaceae</i>           | <i>Verrucomicrobiales</i>                  | <i>Verrucomicrobiae</i>         | <i>Verrucomicrobia</i>   | <i>Bacteria</i> |
| Otu0811 | 0.4                                       | 0                              | 0.13              | 0.8                   | 0.25                | 68.54                | unclass. <i>Bacteria</i>            | unclass. <i>Bacteria</i>             | unclass. <i>Bacteria</i>                   | unclass. <i>Bacteria</i>        | unclass. <i>Bacteria</i> | <i>Bacteria</i> |
| Otu0255 | 0.4                                       | 0                              | 0.13              | 0.8                   | 0.25                | 68.79                | <i>Sphingopyxis</i>                 | <i>Sphingomonadaceae</i>             | <i>Sphingomonadales</i>                    | <i>Alphaproteobacteria</i>      | <i>Proteobacteria</i>    | <i>Bacteria</i> |
| Otu0707 | 0.4                                       | 0                              | 0.13              | 0.8                   | 0.25                | 69.04                | <i>Haliea</i>                       | <i>Alteromonadaceae</i>              | <i>Alteromonadales</i>                     | <i>Gammaproteobacteria</i>      | <i>Proteobacteria</i>    | <i>Bacteria</i> |
| Otu0819 | 0.4                                       | 0                              | 0.13              | 0.8                   | 0.25                | 69.29                | unclass. <i>Bacteria</i>            | unclass. <i>Bacteria</i>             | unclass. <i>Bacteria</i>                   | unclass. <i>Bacteria</i>        | unclass. <i>Bacteria</i> | <i>Bacteria</i> |
| Otu0881 | 0                                         | 0.4                            | 0.13              | 0.8                   | 0.24                | 69.53                | unclass. <i>Actinobacteria</i>      | unclass. <i>Actinobacteria</i>       | unclass. <i>Actinobacteria</i>             | <i>Actinobacteria</i>           | <i>Actinobacteria</i>    | <i>Bacteria</i> |
| Otu0550 | 0.28                                      | 0.2                            | 0.13              | 0.69                  | 0.24                | 69.78                | unclass. <i>Flavobacteriales</i>    | unclass. <i>Flavobacteriales</i>     | <i>Flavobacteriales</i>                    | <i>Flavobacteria</i>            | <i>Bacteroidetes</i>     | <i>Bacteria</i> |

| OTU     | Av.A <sub>i</sub><br>(pH <i>in situ</i> ) | Av.A <sub>i</sub><br>(pH 7.67) | Av.δ <sub>i</sub> | Av.δ <sub>i</sub> /SD | Av.δ <sub>i</sub> % | ΣAv.δ <sub>i</sub> % | Genus                               | Family                              | Order                               | Class                          | Phylum                   | Domain          |
|---------|-------------------------------------------|--------------------------------|-------------------|-----------------------|---------------------|----------------------|-------------------------------------|-------------------------------------|-------------------------------------|--------------------------------|--------------------------|-----------------|
| Otu0583 | 0                                         | 0.4                            | 0.13              | 0.8                   | 0.24                | 70.02                | unclass. <i>Flavobacteriaceae</i>   | <i>Flavobacteriaceae</i>            | <i>Flavobacteriales</i>             | <i>Flavobacteria</i>           | <i>Bacteroidetes</i>     | <i>Bacteria</i> |
| Otu0841 | 0                                         | 0.35                           | 0.13              | 0.49                  | 0.24                | 70.26                | unclass. <i>Gammaproteobacteria</i> | unclass. <i>Gammaproteobacteria</i> | unclass. <i>Gammaproteobacteria</i> | <i>Gammaproteobacteria</i>     | <i>Proteobacteria</i>    | <i>Bacteria</i> |
| Otu0072 | 0.35                                      | 0                              | 0.12              | 0.49                  | 0.23                | 70.49                | <i>Sulfitobacter</i>                | <i>Rhodobacteraceae</i>             | <i>Rhodobacterales</i>              | <i>Alphaproteobacteria</i>     | <i>Proteobacteria</i>    | <i>Bacteria</i> |
| Otu0757 | 0.35                                      | 0                              | 0.12              | 0.49                  | 0.23                | 70.73                | unclass. <i>Gammaproteobacteria</i> | unclass. <i>Gammaproteobacteria</i> | unclass. <i>Gammaproteobacteria</i> | <i>Gammaproteobacteria</i>     | <i>Proteobacteria</i>    | <i>Bacteria</i> |
| Otu0789 | 0.35                                      | 0                              | 0.12              | 0.49                  | 0.22                | 70.95                | unclass. <i>Proteobacteria</i>      | unclass. <i>Proteobacteria</i>      | unclass. <i>Proteobacteria</i>      | unclass. <i>Proteobacteria</i> | <i>Proteobacteria</i>    | <i>Bacteria</i> |
| Otu0814 | 0.35                                      | 0                              | 0.12              | 0.49                  | 0.22                | 71.18                | unclass. <i>Proteobacteria</i>      | unclass. <i>Proteobacteria</i>      | unclass. <i>Proteobacteria</i>      | unclass. <i>Proteobacteria</i> | <i>Proteobacteria</i>    | <i>Bacteria</i> |
| Otu0912 | 0                                         | 0.35                           | 0.12              | 0.49                  | 0.22                | 71.39                | unclass. <i>Gammaproteobacteria</i> | unclass. <i>Gammaproteobacteria</i> | unclass. <i>Gammaproteobacteria</i> | <i>Gammaproteobacteria</i>     | <i>Proteobacteria</i>    | <i>Bacteria</i> |
| Otu0914 | 0                                         | 0.35                           | 0.12              | 0.49                  | 0.22                | 71.61                | unclass. <i>Gammaproteobacteria</i> | unclass. <i>Gammaproteobacteria</i> | unclass. <i>Gammaproteobacteria</i> | <i>Gammaproteobacteria</i>     | <i>Proteobacteria</i>    | <i>Bacteria</i> |
| Otu0763 | 0.2                                       | 0.2                            | 0.12              | 0.67                  | 0.22                | 71.82                | <i>Planctomyces</i>                 | <i>Planctomycetaceae</i>            | <i>Planctomycetales</i>             | <i>Planctomycetacia</i>        | <i>Planctomycetes</i>    | <i>Bacteria</i> |
| Otu0755 | 0.2                                       | 0.2                            | 0.11              | 0.67                  | 0.22                | 72.04                | unclass. <i>Proteobacteria</i>      | unclass. <i>Proteobacteria</i>      | unclass. <i>Proteobacteria</i>      | unclass. <i>Proteobacteria</i> | <i>Proteobacteria</i>    | <i>Bacteria</i> |
| Otu0044 | 0.2                                       | 0.2                            | 0.11              | 0.67                  | 0.21                | 72.25                | unclass. <i>Gammaproteobacteria</i> | unclass. <i>Gammaproteobacteria</i> | unclass. <i>Gammaproteobacteria</i> | <i>Gammaproteobacteria</i>     | <i>Proteobacteria</i>    | <i>Bacteria</i> |
| Otu0514 | 0.2                                       | 0.2                            | 0.11              | 0.67                  | 0.21                | 72.46                | unclass. <i>Microbacteriaceae</i>   | <i>Microbacteriaceae</i>            | <i>Actinomycetales</i>              | <i>Actinobacteria</i>          | <i>Actinobacteria</i>    | <i>Bacteria</i> |
| Otu0383 | 0.2                                       | 0.2                            | 0.11              | 0.67                  | 0.21                | 72.68                | unclass. <i>Actinomycetales</i>     | unclass. <i>Actinomycetales</i>     | <i>Actinomycetales</i>              | <i>Actinobacteria</i>          | <i>Actinobacteria</i>    | <i>Bacteria</i> |
| Otu0723 | 0.2                                       | 0.2                            | 0.11              | 0.67                  | 0.21                | 72.89                | unclass. <i>Microbacteriaceae</i>   | <i>Microbacteriaceae</i>            | <i>Actinomycetales</i>              | <i>Actinobacteria</i>          | <i>Actinobacteria</i>    | <i>Bacteria</i> |
| Otu0729 | 0.2                                       | 0.2                            | 0.11              | 0.67                  | 0.21                | 73.09                | unclass. <i>Bacteroidetes</i>       | unclass. <i>Bacteroidetes</i>       | unclass. <i>Bacteroidetes</i>       | unclass. <i>Bacteroidetes</i>  | <i>Bacteroidetes</i>     | <i>Bacteria</i> |
| Otu0739 | 0.2                                       | 0.2                            | 0.11              | 0.67                  | 0.21                | 73.3                 | unclass. <i>Proteobacteria</i>      | unclass. <i>Proteobacteria</i>      | unclass. <i>Proteobacteria</i>      | unclass. <i>Proteobacteria</i> | <i>Proteobacteria</i>    | <i>Bacteria</i> |
| Otu0178 | 0.2                                       | 0.2                            | 0.11              | 0.67                  | 0.21                | 73.51                | unclass. <i>Actinobacteria</i>      | unclass. <i>Actinobacteria</i>      | unclass. <i>Actinobacteria</i>      | <i>Actinobacteria</i>          | <i>Actinobacteria</i>    | <i>Bacteria</i> |
| Otu0718 | 0                                         | 0.35                           | 0.11              | 0.49                  | 0.21                | 73.71                | <i>Aureispira</i>                   | <i>Saprospiraceae</i>               | <i>Sphingobacteriales</i>           | <i>Sphingobacteria</i>         | <i>Bacteroidetes</i>     | <i>Bacteria</i> |
| Otu0009 | 0.2                                       | 0.2                            | 0.11              | 0.67                  | 0.2                 | 73.92                | unclass. <i>Rhodobacteraceae</i>    | <i>Rhodobacteraceae</i>             | <i>Rhodobacterales</i>              | <i>Alphaproteobacteria</i>     | <i>Proteobacteria</i>    | <i>Bacteria</i> |
| Otu0832 | 0.2                                       | 0.2                            | 0.11              | 0.67                  | 0.2                 | 74.12                | unclass. <i>Rhodospirillaceae</i>   | <i>Rhodospirillaceae</i>            | <i>Rhodospirillales</i>             | <i>Alphaproteobacteria</i>     | <i>Proteobacteria</i>    | <i>Bacteria</i> |
| Otu0838 | 0.2                                       | 0.2                            | 0.11              | 0.67                  | 0.2                 | 74.33                | unclass. <i>Bacteroidetes</i>       | unclass. <i>Bacteroidetes</i>       | unclass. <i>Bacteroidetes</i>       | unclass. <i>Bacteroidetes</i>  | <i>Bacteroidetes</i>     | <i>Bacteria</i> |
| Otu0459 | 0.2                                       | 0.2                            | 0.11              | 0.67                  | 0.2                 | 74.53                | <i>Croceibacter</i>                 | <i>Flavobacteriaceae</i>            | <i>Flavobacteriales</i>             | <i>Flavobacteria</i>           | <i>Bacteroidetes</i>     | <i>Bacteria</i> |
| Otu0760 | 0.2                                       | 0.2                            | 0.11              | 0.67                  | 0.2                 | 74.74                | unclass. <i>Bacteria</i>            | unclass. <i>Bacteria</i>            | unclass. <i>Bacteria</i>            | unclass. <i>Bacteria</i>       | unclass. <i>Bacteria</i> | <i>Bacteria</i> |
| Otu0717 | 0.2                                       | 0.2                            | 0.11              | 0.67                  | 0.2                 | 74.94                | unclass. <i>Rhodobacteraceae</i>    | <i>Rhodobacteraceae</i>             | <i>Rhodobacterales</i>              | <i>Alphaproteobacteria</i>     | <i>Proteobacteria</i>    | <i>Bacteria</i> |
| Otu0770 | 0.2                                       | 0.2                            | 0.11              | 0.67                  | 0.2                 | 75.14                | unclass. <i>Proteobacteria</i>      | unclass. <i>Proteobacteria</i>      | unclass. <i>Proteobacteria</i>      | unclass. <i>Proteobacteria</i> | <i>Proteobacteria</i>    | <i>Bacteria</i> |
| Otu0011 | 0.2                                       | 0.2                            | 0.11              | 0.67                  | 0.2                 | 75.34                | unclass. <i>Flavobacteriaceae</i>   | <i>Flavobacteriaceae</i>            | <i>Flavobacteriales</i>             | <i>Flavobacteria</i>           | <i>Bacteroidetes</i>     | <i>Bacteria</i> |
| Otu0720 | 0.2                                       | 0.2                            | 0.11              | 0.67                  | 0.2                 | 75.54                | unclass. <i>Bacteria</i>            | unclass. <i>Bacteria</i>            | unclass. <i>Bacteria</i>            | unclass. <i>Bacteria</i>       | unclass. <i>Bacteria</i> | <i>Bacteria</i> |

| OTU     | Av.A <sub>i</sub><br>(pH <i>in situ</i> ) | Av.A <sub>i</sub><br>(pH 7.67) | Av.δ <sub>i</sub> | Av.δ <sub>i</sub> /SD | Av.δ <sub>i</sub> % | ΣAv.δ <sub>i</sub> % | Genus                               | Family                               | Order                                      | Class                           | Phylum                   | Domain          |
|---------|-------------------------------------------|--------------------------------|-------------------|-----------------------|---------------------|----------------------|-------------------------------------|--------------------------------------|--------------------------------------------|---------------------------------|--------------------------|-----------------|
| Otu0738 | 0.2                                       | 0.2                            | 0.11              | 0.67                  | 0.2                 | 75.74                | unclass. <i>Alphaproteobacteria</i> | unclass. <i>Alphaproteobacteria</i>  | unclass. <i>Alphaproteobacteria</i>        | <i>Alphaproteobacteria</i>      | <i>Proteobacteria</i>    | <i>Bacteria</i> |
| Otu0143 | 0.2                                       | 0.2                            | 0.11              | 0.67                  | 0.2                 | 75.94                | unclass. <i>Gammaproteobacteria</i> | unclass. <i>Gammaproteobacteria</i>  | unclass. <i>Gammaproteobacteria</i>        | <i>Gammaproteobacteria</i>      | <i>Proteobacteria</i>    | <i>Bacteria</i> |
| Otu0428 | 0.2                                       | 0.2                            | 0.11              | 0.67                  | 0.2                 | 76.14                | unclass. <i>Gammaproteobacteria</i> | unclass. <i>Gammaproteobacteria</i>  | unclass. <i>Gammaproteobacteria</i>        | <i>Gammaproteobacteria</i>      | <i>Proteobacteria</i>    | <i>Bacteria</i> |
| Otu0035 | 0.2                                       | 0.2                            | 0.1               | 0.67                  | 0.19                | 76.33                | <i>Colwellia</i>                    | <i>Colwelliaceae</i>                 | <i>Alteromonadales</i>                     | <i>Gammaproteobacteria</i>      | <i>Proteobacteria</i>    | <i>Bacteria</i> |
| Otu0017 | 0.28                                      | 0                              | 0.1               | 0.49                  | 0.19                | 76.52                | unclass. <i>Flavobacteriales</i>    | unclass. <i>Flavobacteriales</i>     | <i>Flavobacteriales</i>                    | <i>Flavobacteria</i>            | <i>Bacteroidetes</i>     | <i>Bacteria</i> |
| Otu0030 | 0.28                                      | 0                              | 0.1               | 0.49                  | 0.19                | 76.71                | unclass. <i>Gammaproteobacteria</i> | unclass. <i>Gammaproteobacteria</i>  | unclass. <i>Gammaproteobacteria</i>        | <i>Gammaproteobacteria</i>      | <i>Proteobacteria</i>    | <i>Bacteria</i> |
| Otu0282 | 0.28                                      | 0                              | 0.1               | 0.49                  | 0.18                | 76.9                 | <i>Haliea</i>                       | <i>Alteromonadaceae</i>              | <i>Alteromonadales</i>                     | <i>Gammaproteobacteria</i>      | <i>Proteobacteria</i>    | <i>Bacteria</i> |
| Otu0743 | 0.28                                      | 0                              | 0.1               | 0.49                  | 0.18                | 77.08                | unclass. <i>Verrucomicrobia</i>     | unclass. <i>Verrucomicrobia</i>      | unclass. <i>Verrucomicrobia</i>            | unclass. <i>Verrucomicrobia</i> | <i>Verrucomicrobia</i>   | <i>Bacteria</i> |
| Otu0761 | 0.28                                      | 0                              | 0.1               | 0.49                  | 0.18                | 77.26                | unclass. <i>Verrucomicrobiaceae</i> | <i>Verrucomicrobiaceae</i>           | <i>Verrucomicrobiales</i>                  | <i>Verrucomicrobiae</i>         | <i>Verrucomicrobia</i>   | <i>Bacteria</i> |
| Otu0810 | 0.28                                      | 0                              | 0.1               | 0.49                  | 0.18                | 77.45                | unclass. <i>Gammaproteobacteria</i> | unclass. <i>Gammaproteobacteria</i>  | unclass. <i>Gammaproteobacteria</i>        | <i>Gammaproteobacteria</i>      | <i>Proteobacteria</i>    | <i>Bacteria</i> |
| Otu0827 | 0.28                                      | 0                              | 0.1               | 0.49                  | 0.18                | 77.63                | unclass. <i>Bacteria</i>            | unclass. <i>Bacteria</i>             | unclass. <i>Bacteria</i>                   | unclass. <i>Bacteria</i>        | unclass. <i>Bacteria</i> | <i>Bacteria</i> |
| Otu0407 | 0                                         | 0.28                           | 0.09              | 0.49                  | 0.18                | 77.81                | unclass. <i>Flavobacteriales</i>    | unclass. <i>Flavobacteriales</i>     | <i>Flavobacteriales</i>                    | <i>Flavobacteria</i>            | <i>Bacteroidetes</i>     | <i>Bacteria</i> |
| Otu0772 | 0.28                                      | 0                              | 0.09              | 0.49                  | 0.17                | 77.97                | unclass. <i>Alphaproteobacteria</i> | unclass. <i>Alphaproteobacteria</i>  | unclass. <i>Alphaproteobacteria</i>        | <i>Alphaproteobacteria</i>      | <i>Proteobacteria</i>    | <i>Bacteria</i> |
| Otu0839 | 0.28                                      | 0                              | 0.09              | 0.49                  | 0.17                | 78.14                | unclass. <i>Bacteria</i>            | unclass. <i>Bacteria</i>             | unclass. <i>Bacteria</i>                   | unclass. <i>Bacteria</i>        | unclass. <i>Bacteria</i> | <i>Bacteria</i> |
| Otu0491 | 0                                         | 0.2                            | 0.07              | 0.49                  | 0.14                | 78.28                | unclass. <i>Flavobacteriales</i>    | unclass. <i>Flavobacteriales</i>     | <i>Flavobacteriales</i>                    | <i>Flavobacteria</i>            | <i>Bacteroidetes</i>     | <i>Bacteria</i> |
| Otu0764 | 0                                         | 0.2                            | 0.07              | 0.49                  | 0.14                | 78.42                | unclass. <i>Proteobacteria</i>      | unclass. <i>Proteobacteria</i>       | unclass. <i>Proteobacteria</i>             | unclass. <i>Proteobacteria</i>  | <i>Proteobacteria</i>    | <i>Bacteria</i> |
| Otu0846 | 0                                         | 0.2                            | 0.07              | 0.49                  | 0.14                | 78.56                | unclass. <i>Nannocystaceae</i>      | <i>Nannocystaceae</i>                | <i>Myxococcales</i>                        | <i>Deltaproteobacteria</i>      | <i>Proteobacteria</i>    | <i>Bacteria</i> |
| Otu0858 | 0                                         | 0.2                            | 0.07              | 0.49                  | 0.14                | 78.7                 | unclass. <i>Flavobacteriaceae</i>   | <i>Flavobacteriaceae</i>             | <i>Flavobacteriales</i>                    | <i>Flavobacteria</i>            | <i>Bacteroidetes</i>     | <i>Bacteria</i> |
| Otu0889 | 0                                         | 0.2                            | 0.07              | 0.49                  | 0.14                | 78.84                | unclass. <i>Bacteria</i>            | unclass. <i>Bacteria</i>             | unclass. <i>Bacteria</i>                   | unclass. <i>Bacteria</i>        | unclass. <i>Bacteria</i> | <i>Bacteria</i> |
| Otu0900 | 0                                         | 0.2                            | 0.07              | 0.49                  | 0.14                | 78.98                | <i>Planctomyces</i>                 | <i>Planctomycetaceae</i>             | <i>Planctomycetales</i>                    | <i>Planctomycetacia</i>         | <i>Planctomycetes</i>    | <i>Bacteria</i> |
| Otu0901 | 0                                         | 0.2                            | 0.07              | 0.49                  | 0.14                | 79.12                | unclass. <i>Bacteria</i>            | unclass. <i>Bacteria</i>             | unclass. <i>Bacteria</i>                   | unclass. <i>Bacteria</i>        | unclass. <i>Bacteria</i> | <i>Bacteria</i> |
| Otu0902 | 0                                         | 0.2                            | 0.07              | 0.49                  | 0.14                | 79.26                | unclass. <i>Gammaproteobacteria</i> | unclass. <i>Gammaproteobacteria</i>  | unclass. <i>Gammaproteobacteria</i>        | <i>Gammaproteobacteria</i>      | <i>Proteobacteria</i>    | <i>Bacteria</i> |
| Otu0904 | 0                                         | 0.2                            | 0.07              | 0.49                  | 0.14                | 79.4                 | unclass. <i>Gammaproteobacteria</i> | unclass. <i>Gammaproteobacteria</i>  | unclass. <i>Gammaproteobacteria</i>        | <i>Gammaproteobacteria</i>      | <i>Proteobacteria</i>    | <i>Bacteria</i> |
| Otu0906 | 0                                         | 0.2                            | 0.07              | 0.49                  | 0.14                | 79.54                | unclass. <i>Gammaproteobacteria</i> | unclass. <i>Gammaproteobacteria</i>  | unclass. <i>Gammaproteobacteria</i>        | <i>Gammaproteobacteria</i>      | <i>Proteobacteria</i>    | <i>Bacteria</i> |
| Otu0086 | 0                                         | 0.2                            | 0.07              | 0.49                  | 0.14                | 79.68                | <i>Ilumatobacter</i>                | <i>Acidimicrobiae_incertae_sedis</i> | <i>Actinobacteria_order_incertae_sedis</i> | <i>Actinobacteria</i>           | <i>Actinobacteria</i>    | <i>Bacteria</i> |
| Otu0109 | 0                                         | 0.2                            | 0.07              | 0.49                  | 0.14                | 79.82                | <i>Alteromonas</i>                  | <i>Alteromonadaceae</i>              | <i>Alteromonadales</i>                     | <i>Gammaproteobacteria</i>      | <i>Proteobacteria</i>    | <i>Bacteria</i> |
| Otu0196 | 0                                         | 0.2                            | 0.07              | 0.49                  | 0.14                | 79.96                | unclass. <i>Flavobacteriaceae</i>   | <i>Flavobacteriaceae</i>             | <i>Flavobacteriales</i>                    | <i>Flavobacteria</i>            | <i>Bacteroidetes</i>     | <i>Bacteria</i> |



| OTU     | Av.A <sub>i</sub><br>(pH <i>in situ</i> ) | Av.A <sub>i</sub><br>(pH 7.67) | Av.δ <sub>i</sub> | Av.δ <sub>i</sub> /SD | Av.δ <sub>i</sub> % | ΣAv.δ <sub>i</sub> % | Genus                               | Family                              | Order                               | Class                          | Phylum                   | Domain          |
|---------|-------------------------------------------|--------------------------------|-------------------|-----------------------|---------------------|----------------------|-------------------------------------|-------------------------------------|-------------------------------------|--------------------------------|--------------------------|-----------------|
| Otu0201 | 0                                         | 0.2                            | 0.07              | 0.49                  | 0.14                | 80.1                 | unclass. <i>Alphaproteobacteria</i> | unclass. <i>Alphaproteobacteria</i> | unclass. <i>Alphaproteobacteria</i> | <i>Alphaproteobacteria</i>     | <i>Proteobacteria</i>    | <i>Bacteria</i> |
| Otu0465 | 0                                         | 0.2                            | 0.07              | 0.49                  | 0.14                | 80.24                | unclass. <i>Bacteroidetes</i>       | unclass. <i>Bacteroidetes</i>       | unclass. <i>Bacteroidetes</i>       | unclass. <i>Bacteroidetes</i>  | <i>Bacteroidetes</i>     | <i>Bacteria</i> |
| Otu0520 | 0                                         | 0.2                            | 0.07              | 0.49                  | 0.14                | 80.37                | unclass. <i>Alphaproteobacteria</i> | unclass. <i>Alphaproteobacteria</i> | unclass. <i>Alphaproteobacteria</i> | <i>Alphaproteobacteria</i>     | <i>Proteobacteria</i>    | <i>Bacteria</i> |
| Otu0771 | 0                                         | 0.2                            | 0.07              | 0.49                  | 0.14                | 80.51                | unclass. <i>Rhodobacteraceae</i>    | <i>Rhodobacteraceae</i>             | <i>Rhodobacterales</i>              | <i>Alphaproteobacteria</i>     | <i>Proteobacteria</i>    | <i>Bacteria</i> |
| Otu0792 | 0                                         | 0.2                            | 0.07              | 0.49                  | 0.14                | 80.65                | <i>Kordia</i>                       | <i>Flavobacteriaceae</i>            | <i>Flavobacteriales</i>             | <i>Flavobacteria</i>           | <i>Bacteroidetes</i>     | <i>Bacteria</i> |
| Otu0948 | 0                                         | 0.2                            | 0.07              | 0.49                  | 0.14                | 80.79                | unclass. <i>Bacteria</i>            | unclass. <i>Bacteria</i>            | unclass. <i>Bacteria</i>            | unclass. <i>Bacteria</i>       | unclass. <i>Bacteria</i> | <i>Bacteria</i> |
| Otu0949 | 0                                         | 0.2                            | 0.07              | 0.49                  | 0.14                | 80.93                | unclass. <i>Gammaproteobacteria</i> | unclass. <i>Gammaproteobacteria</i> | unclass. <i>Gammaproteobacteria</i> | <i>Gammaproteobacteria</i>     | <i>Proteobacteria</i>    | <i>Bacteria</i> |
| Otu0950 | 0                                         | 0.2                            | 0.07              | 0.49                  | 0.14                | 81.07                | unclass. <i>Gammaproteobacteria</i> | unclass. <i>Gammaproteobacteria</i> | unclass. <i>Gammaproteobacteria</i> | <i>Gammaproteobacteria</i>     | <i>Proteobacteria</i>    | <i>Bacteria</i> |
| Otu0952 | 0                                         | 0.2                            | 0.07              | 0.49                  | 0.14                | 81.21                | unclass. <i>Bacteria</i>            | unclass. <i>Bacteria</i>            | unclass. <i>Bacteria</i>            | unclass. <i>Bacteria</i>       | unclass. <i>Bacteria</i> | <i>Bacteria</i> |
| Otu0953 | 0                                         | 0.2                            | 0.07              | 0.49                  | 0.14                | 81.34                | unclass. <i>Proteobacteria</i>      | unclass. <i>Proteobacteria</i>      | unclass. <i>Proteobacteria</i>      | unclass. <i>Proteobacteria</i> | <i>Proteobacteria</i>    | <i>Bacteria</i> |
| Otu0955 | 0                                         | 0.2                            | 0.07              | 0.49                  | 0.14                | 81.48                | <i>Lewinella</i>                    | <i>Saprospiraceae</i>               | <i>Sphingobacteriales</i>           | <i>Sphingobacteria</i>         | <i>Bacteroidetes</i>     | <i>Bacteria</i> |
| Otu0956 | 0                                         | 0.2                            | 0.07              | 0.49                  | 0.14                | 81.62                | unclass. <i>Flavobacteriaceae</i>   | <i>Flavobacteriaceae</i>            | <i>Flavobacteriales</i>             | <i>Flavobacteria</i>           | <i>Bacteroidetes</i>     | <i>Bacteria</i> |
| Otu0958 | 0                                         | 0.2                            | 0.07              | 0.49                  | 0.14                | 81.76                | <i>Ulvibacter</i>                   | <i>Flavobacteriaceae</i>            | <i>Flavobacteriales</i>             | <i>Flavobacteria</i>           | <i>Bacteroidetes</i>     | <i>Bacteria</i> |
| Otu0027 | 0.2                                       | 0                              | 0.07              | 0.49                  | 0.13                | 81.9                 | <i>Pseudoalteromonas</i>            | <i>Pseudoalteromonadaceae</i>       | <i>Alteromonadales</i>              | <i>Gammaproteobacteria</i>     | <i>Proteobacteria</i>    | <i>Bacteria</i> |
| Otu0167 | 0.2                                       | 0                              | 0.07              | 0.49                  | 0.13                | 82.03                | unclass. <i>Rhodobacteraceae</i>    | <i>Rhodobacteraceae</i>             | <i>Rhodobacterales</i>              | <i>Alphaproteobacteria</i>     | <i>Proteobacteria</i>    | <i>Bacteria</i> |
| Otu0213 | 0.2                                       | 0                              | 0.07              | 0.49                  | 0.13                | 82.16                | unclass. <i>Gammaproteobacteria</i> | unclass. <i>Gammaproteobacteria</i> | unclass. <i>Gammaproteobacteria</i> | <i>Gammaproteobacteria</i>     | <i>Proteobacteria</i>    | <i>Bacteria</i> |
| Otu0290 | 0.2                                       | 0                              | 0.07              | 0.49                  | 0.13                | 82.3                 | unclass. <i>Flavobacteriaceae</i>   | <i>Flavobacteriaceae</i>            | <i>Flavobacteriales</i>             | <i>Flavobacteria</i>           | <i>Bacteroidetes</i>     | <i>Bacteria</i> |
| Otu0594 | 0.2                                       | 0                              | 0.07              | 0.49                  | 0.13                | 82.43                | unclass. <i>Bacteria</i>            | unclass. <i>Bacteria</i>            | unclass. <i>Bacteria</i>            | unclass. <i>Bacteria</i>       | unclass. <i>Bacteria</i> | <i>Bacteria</i> |
| Otu0702 | 0.2                                       | 0                              | 0.07              | 0.49                  | 0.13                | 82.57                | unclass. <i>Flavobacteriales</i>    | unclass. <i>Flavobacteriales</i>    | <i>Flavobacteriales</i>             | <i>Flavobacteria</i>           | <i>Bacteroidetes</i>     | <i>Bacteria</i> |
| Otu0709 | 0.2                                       | 0                              | 0.07              | 0.49                  | 0.13                | 82.7                 | unclass. <i>Bacteria</i>            | unclass. <i>Bacteria</i>            | unclass. <i>Bacteria</i>            | unclass. <i>Bacteria</i>       | unclass. <i>Bacteria</i> | <i>Bacteria</i> |
| Otu0712 | 0.2                                       | 0                              | 0.07              | 0.49                  | 0.13                | 82.84                | unclass. <i>Alphaproteobacteria</i> | unclass. <i>Alphaproteobacteria</i> | unclass. <i>Alphaproteobacteria</i> | <i>Alphaproteobacteria</i>     | <i>Proteobacteria</i>    | <i>Bacteria</i> |
| Otu0719 | 0.2                                       | 0                              | 0.07              | 0.49                  | 0.13                | 82.97                | unclass. <i>Flavobacteriales</i>    | unclass. <i>Flavobacteriales</i>    | <i>Flavobacteriales</i>             | <i>Flavobacteria</i>           | <i>Bacteroidetes</i>     | <i>Bacteria</i> |
| Otu0722 | 0.2                                       | 0                              | 0.07              | 0.49                  | 0.13                | 83.11                | unclass. <i>Rhodobacteraceae</i>    | <i>Rhodobacteraceae</i>             | <i>Rhodobacterales</i>              | <i>Alphaproteobacteria</i>     | <i>Proteobacteria</i>    | <i>Bacteria</i> |
| Otu0726 | 0.2                                       | 0                              | 0.07              | 0.49                  | 0.13                | 83.24                | unclass. <i>Bacteroidetes</i>       | unclass. <i>Bacteroidetes</i>       | unclass. <i>Bacteroidetes</i>       | unclass. <i>Bacteroidetes</i>  | <i>Bacteroidetes</i>     | <i>Bacteria</i> |
| Otu0747 | 0.2                                       | 0                              | 0.07              | 0.49                  | 0.13                | 83.37                | unclass. <i>Rhodobacteraceae</i>    | <i>Rhodobacteraceae</i>             | <i>Rhodobacterales</i>              | <i>Alphaproteobacteria</i>     | <i>Proteobacteria</i>    | <i>Bacteria</i> |
| Otu0748 | 0.2                                       | 0                              | 0.07              | 0.49                  | 0.13                | 83.51                | unclass. <i>Proteobacteria</i>      | unclass. <i>Proteobacteria</i>      | unclass. <i>Proteobacteria</i>      | unclass. <i>Proteobacteria</i> | <i>Proteobacteria</i>    | <i>Bacteria</i> |
| Otu0749 | 0.2                                       | 0                              | 0.07              | 0.49                  | 0.13                | 83.64                | unclass. <i>Gammaproteobacteria</i> | unclass. <i>Gammaproteobacteria</i> | unclass. <i>Gammaproteobacteria</i> | <i>Gammaproteobacteria</i>     | <i>Proteobacteria</i>    | <i>Bacteria</i> |

| OTU     | Av.A <sub>i</sub><br>(pH <i>in situ</i> ) | Av.A <sub>i</sub><br>(pH 7.67) | Av.δ <sub>i</sub> | Av.δ <sub>i</sub> /SD | Av.δ <sub>i</sub> % | ΣAv.δ <sub>i</sub> % | Genus                               | Family                                    | Order                                            | Class                          | Phylum                   | Domain          |
|---------|-------------------------------------------|--------------------------------|-------------------|-----------------------|---------------------|----------------------|-------------------------------------|-------------------------------------------|--------------------------------------------------|--------------------------------|--------------------------|-----------------|
| Otu0750 | 0.2                                       | 0                              | 0.07              | 0.49                  | 0.13                | 83.78                | unclass. <i>Gammaproteobacteria</i> | unclass. <i>Gammaproteobacteria</i>       | unclass. <i>Gammaproteobacteria</i>              | <i>Gammaproteobacteria</i>     | <i>Proteobacteria</i>    | <i>Bacteria</i> |
| Otu0083 | 0.2                                       | 0                              | 0.07              | 0.49                  | 0.13                | 83.91                | unclass. <i>Rhodobacteraceae</i>    | <i>Rhodobacteraceae</i>                   | <i>Rhodobacterales</i>                           | <i>Alphaproteobacteria</i>     | <i>Proteobacteria</i>    | <i>Bacteria</i> |
| Otu0165 | 0.2                                       | 0                              | 0.07              | 0.49                  | 0.13                | 84.05                | <i>Marinomonas</i>                  | <i>Oceanospirillaceae</i>                 | <i>Oceanospirillales</i>                         | <i>Gammaproteobacteria</i>     | <i>Proteobacteria</i>    | <i>Bacteria</i> |
| Otu0381 | 0.2                                       | 0                              | 0.07              | 0.49                  | 0.13                | 84.18                | unclass. <i>Chitinophagaceae</i>    | <i>Chitinophagaceae</i>                   | <i>Sphingobacteriales</i>                        | <i>Sphingobacteria</i>         | <i>Bacteroidetes</i>     | <i>Bacteria</i> |
| Otu0483 | 0.2                                       | 0                              | 0.07              | 0.49                  | 0.13                | 84.31                | unclass. <i>Flavobacteriaceae</i>   | <i>Flavobacteriaceae</i>                  | <i>Flavobacteriales</i>                          | <i>Flavobacteria</i>           | <i>Bacteroidetes</i>     | <i>Bacteria</i> |
| Otu0499 | 0.2                                       | 0                              | 0.07              | 0.49                  | 0.13                | 84.45                | unclass. <i>Flavobacteriaceae</i>   | <i>Flavobacteriaceae</i>                  | <i>Flavobacteriales</i>                          | <i>Flavobacteria</i>           | <i>Bacteroidetes</i>     | <i>Bacteria</i> |
| Otu0730 | 0.2                                       | 0                              | 0.07              | 0.49                  | 0.13                | 84.58                | unclass. <i>Proteobacteria</i>      | unclass. <i>Proteobacteria</i>            | unclass. <i>Proteobacteria</i>                   | unclass. <i>Proteobacteria</i> | <i>Proteobacteria</i>    | <i>Bacteria</i> |
| Otu0756 | 0.2                                       | 0                              | 0.07              | 0.49                  | 0.13                | 84.72                | unclass. <i>Bacteroidetes</i>       | unclass. <i>Bacteroidetes</i>             | unclass. <i>Bacteroidetes</i>                    | unclass. <i>Bacteroidetes</i>  | <i>Bacteroidetes</i>     | <i>Bacteria</i> |
| Otu0769 | 0.2                                       | 0                              | 0.07              | 0.49                  | 0.13                | 84.85                | unclass. <i>Bacteroidetes</i>       | unclass. <i>Bacteroidetes</i>             | unclass. <i>Bacteroidetes</i>                    | unclass. <i>Bacteroidetes</i>  | <i>Bacteroidetes</i>     | <i>Bacteria</i> |
| Otu0775 | 0.2                                       | 0                              | 0.07              | 0.49                  | 0.13                | 84.98                | unclass. <i>Flavobacteriales</i>    | unclass. <i>Flavobacteriales</i>          | <i>Flavobacteriales</i>                          | <i>Flavobacteria</i>           | <i>Bacteroidetes</i>     | <i>Bacteria</i> |
| Otu0777 | 0.2                                       | 0                              | 0.07              | 0.49                  | 0.13                | 85.12                | unclass. <i>Flavobacteriaceae</i>   | <i>Flavobacteriaceae</i>                  | <i>Flavobacteriales</i>                          | <i>Flavobacteria</i>           | <i>Bacteroidetes</i>     | <i>Bacteria</i> |
| Otu0778 | 0.2                                       | 0                              | 0.07              | 0.49                  | 0.13                | 85.25                | unclass. <i>Gammaproteobacteria</i> | unclass. <i>Gammaproteobacteria</i>       | unclass. <i>Gammaproteobacteria</i>              | <i>Gammaproteobacteria</i>     | <i>Proteobacteria</i>    | <i>Bacteria</i> |
| Otu0318 | 0.2                                       | 0                              | 0.07              | 0.49                  | 0.13                | 85.38                | unclass. <i>Verrucomicrobiaceae</i> | <i>Verrucomicrobiaceae</i>                | <i>Verrucomicrobiales</i>                        | <i>Verrucomicrobiae</i>        | <i>Verrucomicrobia</i>   | <i>Bacteria</i> |
| Otu0780 | 0.2                                       | 0                              | 0.07              | 0.49                  | 0.13                | 85.51                | unclass. <i>Gammaproteobacteria</i> | unclass. <i>Gammaproteobacteria</i>       | unclass. <i>Gammaproteobacteria</i>              | <i>Gammaproteobacteria</i>     | <i>Proteobacteria</i>    | <i>Bacteria</i> |
| Otu0784 | 0.2                                       | 0                              | 0.07              | 0.49                  | 0.13                | 85.64                | unclass. <i>Bacteria</i>            | unclass. <i>Bacteria</i>                  | unclass. <i>Bacteria</i>                         | unclass. <i>Bacteria</i>       | unclass. <i>Bacteria</i> | <i>Bacteria</i> |
| Otu0785 | 0.2                                       | 0                              | 0.07              | 0.49                  | 0.13                | 85.77                | unclass. <i>Bacteroidetes</i>       | unclass. <i>Bacteroidetes</i>             | unclass. <i>Bacteroidetes</i>                    | unclass. <i>Bacteroidetes</i>  | <i>Bacteroidetes</i>     | <i>Bacteria</i> |
| Otu0788 | 0.2                                       | 0                              | 0.07              | 0.49                  | 0.13                | 85.9                 | <i>Methylohalomonas</i>             | <i>Gammaproteobacteria_incertae_sedis</i> | <i>Gammaproteobacteria_order_in_certae_sedis</i> | <i>Gammaproteobacteria</i>     | <i>Proteobacteria</i>    | <i>Bacteria</i> |
| Otu0790 | 0.2                                       | 0                              | 0.07              | 0.49                  | 0.13                | 86.03                | unclass. <i>Sphingobacteriales</i>  | unclass. <i>Sphingobacteriales</i>        | <i>Sphingobacteriales</i>                        | <i>Sphingobacteria</i>         | <i>Bacteroidetes</i>     | <i>Bacteria</i> |
| Otu0791 | 0.2                                       | 0                              | 0.07              | 0.49                  | 0.13                | 86.16                | <i>Thalassomonas</i>                | <i>Colwelliaceae</i>                      | <i>Alteromonadales</i>                           | <i>Gammaproteobacteria</i>     | <i>Proteobacteria</i>    | <i>Bacteria</i> |
| Otu0793 | 0.2                                       | 0                              | 0.07              | 0.49                  | 0.13                | 86.29                | unclass. <i>Gammaproteobacteria</i> | unclass. <i>Gammaproteobacteria</i>       | unclass. <i>Gammaproteobacteria</i>              | <i>Gammaproteobacteria</i>     | <i>Proteobacteria</i>    | <i>Bacteria</i> |
| Otu0794 | 0.2                                       | 0                              | 0.07              | 0.49                  | 0.13                | 86.42                | <i>Legionella</i>                   | <i>Legionellaceae</i>                     | <i>Legionellales</i>                             | <i>Gammaproteobacteria</i>     | <i>Proteobacteria</i>    | <i>Bacteria</i> |
| Otu0796 | 0.2                                       | 0                              | 0.07              | 0.49                  | 0.13                | 86.55                | unclass. <i>Bacteroidetes</i>       | unclass. <i>Bacteroidetes</i>             | unclass. <i>Bacteroidetes</i>                    | unclass. <i>Bacteroidetes</i>  | <i>Bacteroidetes</i>     | <i>Bacteria</i> |
| Otu0797 | 0.2                                       | 0                              | 0.07              | 0.49                  | 0.13                | 86.68                | unclass. <i>Bacteria</i>            | unclass. <i>Bacteria</i>                  | unclass. <i>Bacteria</i>                         | unclass. <i>Bacteria</i>       | unclass. <i>Bacteria</i> | <i>Bacteria</i> |
| Otu0799 | 0.2                                       | 0                              | 0.07              | 0.49                  | 0.13                | 86.81                | unclass. <i>Gammaproteobacteria</i> | unclass. <i>Gammaproteobacteria</i>       | unclass. <i>Gammaproteobacteria</i>              | <i>Gammaproteobacteria</i>     | <i>Proteobacteria</i>    | <i>Bacteria</i> |
| Otu0801 | 0.2                                       | 0                              | 0.07              | 0.49                  | 0.13                | 86.94                | unclass. <i>Verrucomicrobiaceae</i> | <i>Verrucomicrobiaceae</i>                | <i>Verrucomicrobiales</i>                        | <i>Verrucomicrobiae</i>        | <i>Verrucomicrobia</i>   | <i>Bacteria</i> |
| Otu0802 | 0.2                                       | 0                              | 0.07              | 0.49                  | 0.13                | 87.07                | unclass. <i>Flammeovirgaceae</i>    | <i>Flammeovirgaceae</i>                   | <i>Sphingobacteriales</i>                        | <i>Sphingobacteria</i>         | <i>Bacteroidetes</i>     | <i>Bacteria</i> |
| Otu0804 | 0.2                                       | 0                              | 0.07              | 0.49                  | 0.13                | 87.2                 | unclass. <i>Bacteria</i>            | unclass. <i>Bacteria</i>                  | unclass. <i>Bacteria</i>                         | unclass. <i>Bacteria</i>       | unclass. <i>Bacteria</i> | <i>Bacteria</i> |

| OTU                                                     | Av.A <sub>i</sub><br>(pH <i>in situ</i> ) | Av.A <sub>i</sub><br>(pH 7.67) | Av.δ <sub>i</sub> | Av.δ <sub>i</sub> /SD | Av.δ <sub>i</sub> % | ΣAv.δ <sub>i</sub> % | Genus                               | Family                                | Order                                      | Class                          | Phylum                   | Domain          |
|---------------------------------------------------------|-------------------------------------------|--------------------------------|-------------------|-----------------------|---------------------|----------------------|-------------------------------------|---------------------------------------|--------------------------------------------|--------------------------------|--------------------------|-----------------|
| Otu0805                                                 | 0.2                                       | 0                              | 0.07              | 0.49                  | 0.13                | 87.33                | unclass. <i>Proteobacteria</i>      | unclass. <i>Proteobacteria</i>        | unclass. <i>Proteobacteria</i>             | unclass. <i>Proteobacteria</i> | <i>Proteobacteria</i>    | <i>Bacteria</i> |
| Otu0806                                                 | 0.2                                       | 0                              | 0.07              | 0.49                  | 0.13                | 87.46                | <i>Nocardioides</i>                 | <i>Nocardioidaceae</i>                | <i>Actinomycetales</i>                     | <i>Actinobacteria</i>          | <i>Actinobacteria</i>    | <i>Bacteria</i> |
| Otu0813                                                 | 0.2                                       | 0                              | 0.07              | 0.49                  | 0.13                | 87.59                | unclass. <i>Flavobacteriaceae</i>   | <i>Flavobacteriaceae</i>              | <i>Flavobacteriales</i>                    | <i>Flavobacteria</i>           | <i>Bacteroidetes</i>     | <i>Bacteria</i> |
| Otu0078                                                 | 0.2                                       | 0                              | 0.07              | 0.49                  | 0.13                | 87.72                | <i>Erythrobacter</i>                | <i>Erythrobacteraceae</i>             | <i>Sphingomonadales</i>                    | <i>Alphaproteobacteria</i>     | <i>Proteobacteria</i>    | <i>Bacteria</i> |
| Otu0168                                                 | 0.2                                       | 0                              | 0.07              | 0.49                  | 0.13                | 87.84                | unclass. <i>Flavobacteriaceae</i>   | <i>Flavobacteriaceae</i>              | <i>Flavobacteriales</i>                    | <i>Flavobacteria</i>           | <i>Bacteroidetes</i>     | <i>Bacteria</i> |
| Otu0285                                                 | 0.2                                       | 0                              | 0.07              | 0.49                  | 0.13                | 87.97                | unclass. <i>Gammaproteobacteria</i> | unclass. <i>Gammaproteobacteria</i>   | unclass. <i>Gammaproteobacteria</i>        | <i>Gammaproteobacteria</i>     | <i>Proteobacteria</i>    | <i>Bacteria</i> |
| Otu0335                                                 | 0.2                                       | 0                              | 0.07              | 0.49                  | 0.13                | 88.1                 | unclass. <i>Flavobacteriaceae</i>   | <i>Flavobacteriaceae</i>              | <i>Flavobacteriales</i>                    | <i>Flavobacteria</i>           | <i>Bacteroidetes</i>     | <i>Bacteria</i> |
| Otu0815                                                 | 0.2                                       | 0                              | 0.07              | 0.49                  | 0.13                | 88.23                | unclass. <i>Proteobacteria</i>      | unclass. <i>Proteobacteria</i>        | unclass. <i>Proteobacteria</i>             | unclass. <i>Proteobacteria</i> | <i>Proteobacteria</i>    | <i>Bacteria</i> |
| Otu0816                                                 | 0.2                                       | 0                              | 0.07              | 0.49                  | 0.13                | 88.36                | unclass. <i>Bacteria</i>            | unclass. <i>Bacteria</i>              | unclass. <i>Bacteria</i>                   | unclass. <i>Bacteria</i>       | unclass. <i>Bacteria</i> | <i>Bacteria</i> |
| Otu0820                                                 | 0.2                                       | 0                              | 0.07              | 0.49                  | 0.13                | 88.49                | unclass. <i>Gammaproteobacteria</i> | unclass. <i>Gammaproteobacteria</i>   | unclass. <i>Gammaproteobacteria</i>        | <i>Gammaproteobacteria</i>     | <i>Proteobacteria</i>    | <i>Bacteria</i> |
| Otu0825                                                 | 0.2                                       | 0                              | 0.07              | 0.49                  | 0.13                | 88.62                | unclass. <i>Saprospiraceae</i>      | <i>Saprospiraceae</i>                 | <i>Sphingobacteriales</i>                  | <i>Sphingobacteria</i>         | <i>Bacteroidetes</i>     | <i>Bacteria</i> |
| Otu0829                                                 | 0.2                                       | 0                              | 0.07              | 0.49                  | 0.13                | 88.75                | unclass. <i>Flavobacteriaceae</i>   | <i>Flavobacteriaceae</i>              | <i>Flavobacteriales</i>                    | <i>Flavobacteria</i>           | <i>Bacteroidetes</i>     | <i>Bacteria</i> |
| Otu0830                                                 | 0.2                                       | 0                              | 0.07              | 0.49                  | 0.13                | 88.88                | unclass. <i>Gammaproteobacteria</i> | unclass. <i>Gammaproteobacteria</i>   | unclass. <i>Gammaproteobacteria</i>        | <i>Gammaproteobacteria</i>     | <i>Proteobacteria</i>    | <i>Bacteria</i> |
| Otu0831                                                 | 0.2                                       | 0                              | 0.07              | 0.49                  | 0.13                | 89.01                | unclass. <i>Proteobacteria</i>      | unclass. <i>Proteobacteria</i>        | unclass. <i>Proteobacteria</i>             | unclass. <i>Proteobacteria</i> | <i>Proteobacteria</i>    | <i>Bacteria</i> |
| Otu0837                                                 | 0.2                                       | 0                              | 0.07              | 0.49                  | 0.13                | 89.14                | unclass. <i>Bacteria</i>            | unclass. <i>Bacteria</i>              | unclass. <i>Bacteria</i>                   | unclass. <i>Bacteria</i>       | unclass. <i>Bacteria</i> | <i>Bacteria</i> |
| Otu0096                                                 | 0                                         | 0.2                            | 0.07              | 0.49                  | 0.13                | 89.27                | unclass. <i>Actinobacteria</i>      | unclass. <i>Actinobacteria</i>        | unclass. <i>Actinobacteria</i>             | <i>Actinobacteria</i>          | <i>Actinobacteria</i>    | <i>Bacteria</i> |
| Otu0101                                                 | 0                                         | 0.2                            | 0.07              | 0.49                  | 0.13                | 89.39                | unclass. <i>Bacteroidetes</i>       | unclass. <i>Bacteroidetes</i>         | unclass. <i>Bacteroidetes</i>              | unclass. <i>Bacteroidetes</i>  | <i>Bacteroidetes</i>     | <i>Bacteria</i> |
| Otu0291                                                 | 0                                         | 0.2                            | 0.07              | 0.49                  | 0.13                | 89.52                | unclass. <i>Flavobacteriaceae</i>   | <i>Flavobacteriaceae</i>              | <i>Flavobacteriales</i>                    | <i>Flavobacteria</i>           | <i>Bacteroidetes</i>     | <i>Bacteria</i> |
| Otu0358                                                 | 0                                         | 0.2                            | 0.07              | 0.49                  | 0.13                | 89.64                | <i>Ilumatobacter</i>                | <i>Acidimicrobidae_incertae_sedis</i> | <i>Actinobacteria_order_incertae_sedis</i> | <i>Actinobacteria</i>          | <i>Actinobacteria</i>    | <i>Bacteria</i> |
| Otu0398                                                 | 0                                         | 0.2                            | 0.07              | 0.49                  | 0.13                | 89.77                | unclass. <i>Flavobacteriaceae</i>   | <i>Flavobacteriaceae</i>              | <i>Flavobacteriales</i>                    | <i>Flavobacteria</i>           | <i>Bacteroidetes</i>     | <i>Bacteria</i> |
| Otu0486                                                 | 0                                         | 0.2                            | 0.07              | 0.49                  | 0.13                | 89.89                | unclass. <i>Flavobacteriaceae</i>   | <i>Flavobacteriaceae</i>              | <i>Flavobacteriales</i>                    | <i>Flavobacteria</i>           | <i>Bacteroidetes</i>     | <i>Bacteria</i> |
| Otu0652                                                 | 0                                         | 0.2                            | 0.07              | 0.49                  | 0.13                | 90.02                | <i>Marinobacter</i>                 | <i>Alteromonadaceae</i>               | <i>Alteromonadales</i>                     | <i>Gammaproteobacteria</i>     | <i>Proteobacteria</i>    | <i>Bacteria</i> |
| Summer 'serial dilution' (average dissimilarity: 57.5%) |                                           |                                |                   |                       |                     |                      |                                     |                                       |                                            |                                |                          |                 |
| Otu0459                                                 | 10.06                                     | 1.53                           | 6.95              | 1.85                  | 12.08               | 12.08                | <i>Croceibacter</i>                 | <i>Flavobacteriaceae</i>              | <i>Flavobacteriales</i>                    | <i>Flavobacteria</i>           | <i>Bacteroidetes</i>     | <i>Bacteria</i> |
| Otu0471                                                 | 6.52                                      | 13.99                          | 6.25              | 1.92                  | 10.86               | 22.95                | <i>Oceaniserpentilla</i>            | <i>Oceanospirillaceae</i>             | <i>Oceanospirillales</i>                   | <i>Gammaproteobacteria</i>     | <i>Proteobacteria</i>    | <i>Bacteria</i> |
| Otu0132                                                 | 11.11                                     | 13.17                          | 5.7               | 1.28                  | 9.91                | 32.86                | unclass. <i>Alteromonadales</i>     | unclass. <i>Alteromonadales</i>       | <i>Alteromonadales</i>                     | <i>Gammaproteobacteria</i>     | <i>Proteobacteria</i>    | <i>Bacteria</i> |
| Otu0525                                                 | 2.2                                       | 6.66                           | 3.66              | 1.95                  | 6.36                | 39.22                | <i>Reinekea</i>                     | <i>Oceanospirillaceae</i>             | <i>Oceanospirillales</i>                   | <i>Gammaproteobacteria</i>     | <i>Proteobacteria</i>    | <i>Bacteria</i> |

| OTU     | Av.A <sub>i</sub><br>(pH <i>in situ</i> ) | Av.A <sub>i</sub><br>(pH 7.67) | Av.δ <sub>i</sub> | Av.δ <sub>i</sub> /SD | Av.δ <sub>i</sub> % | ΣAv.δ <sub>i</sub> % | Genus                               | Family                              | Order                               | Class                         | Phylum                | Domain          |
|---------|-------------------------------------------|--------------------------------|-------------------|-----------------------|---------------------|----------------------|-------------------------------------|-------------------------------------|-------------------------------------|-------------------------------|-----------------------|-----------------|
| Otu0125 | 4.15                                      | 0.4                            | 3.03              | 1.61                  | 5.27                | 44.49                | <i>Leeuwenhoekella</i>              | Flavobacteriaceae                   | Flavobacteriales                    | Flavobacteria                 | Bacteroidetes         | Bacteria        |
| Otu0521 | 4.58                                      | 1.5                            | 2.85              | 1.42                  | 4.96                | 49.46                | unclass. <i>Rhodobacteraceae</i>    | <i>Rhodobacteraceae</i>             | <i>Rhodobacterales</i>              | <i>Alphaproteobacteria</i>    | <i>Proteobacteria</i> | <i>Bacteria</i> |
| Otu0460 | 3.42                                      | 0.93                           | 2.22              | 1.13                  | 3.86                | 53.32                | <i>Arcobacter</i>                   | <i>Campylobacteraceae</i>           | <i>Campylobacterales</i>            | <i>Epsilonproteobacteria</i>  | <i>Proteobacteria</i> | <i>Bacteria</i> |
| Otu0523 | 2.3                                       | 0.2                            | 1.65              | 1.6                   | 2.87                | 56.19                | <i>Pseudidiomarina</i>              | <i>Idiomarinaceae</i>               | <i>Alteromonadales</i>              | <i>Gammaproteobacteria</i>    | <i>Proteobacteria</i> | <i>Bacteria</i> |
| Otu0533 | 0.55                                      | 2.33                           | 1.5               | 1.26                  | 2.61                | 58.8                 | <i>Nisaea</i>                       | <i>Rhodospirillaceae</i>            | <i>Rhodospirillales</i>             | <i>Alphaproteobacteria</i>    | <i>Proteobacteria</i> | <i>Bacteria</i> |
| Otu0524 | 1.85                                      | 0                              | 1.41              | 1.81                  | 2.44                | 61.24                | <i>Pseudidiomarina</i>              | <i>Idiomarinaceae</i>               | <i>Alteromonadales</i>              | <i>Gammaproteobacteria</i>    | <i>Proteobacteria</i> | <i>Bacteria</i> |
| Otu0522 | 1.75                                      | 0                              | 1.32              | 1.82                  | 2.29                | 63.53                | unclass. <i>Flavobacteriaceae</i>   | <i>Flavobacteriaceae</i>            | <i>Flavobacteriales</i>             | <i>Flavobacteria</i>          | <i>Bacteroidetes</i>  | <i>Bacteria</i> |
| Otu0487 | 1.38                                      | 0.2                            | 1.07              | 0.9                   | 1.86                | 65.4                 | unclass. <i>Chitinophagaceae</i>    | <i>Chitinophagaceae</i>             | <i>Sphingobacteriales</i>           | <i>Sphingobacteria</i>        | <i>Bacteroidetes</i>  | <i>Bacteria</i> |
| Otu0526 | 1.39                                      | 0.2                            | 1.04              | 1.08                  | 1.81                | 67.2                 | <i>Maribacter</i>                   | <i>Flavobacteriaceae</i>            | <i>Flavobacteriales</i>             | <i>Flavobacteria</i>          | <i>Bacteroidetes</i>  | <i>Bacteria</i> |
| Otu0537 | 1.38                                      | 0.2                            | 0.98              | 1.68                  | 1.7                 | 68.9                 | unclass. <i>Flavobacteriaceae</i>   | <i>Flavobacteriaceae</i>            | <i>Flavobacteriales</i>             | <i>Flavobacteria</i>          | <i>Bacteroidetes</i>  | <i>Bacteria</i> |
| Otu0531 | 1.7                                       | 0.88                           | 0.91              | 1.49                  | 1.58                | 70.48                | unclass. <i>Flavobacteriaceae</i>   | <i>Flavobacteriaceae</i>            | <i>Flavobacteriales</i>             | <i>Flavobacteria</i>          | <i>Bacteroidetes</i>  | <i>Bacteria</i> |
| Otu0180 | 0.48                                      | 1.45                           | 0.91              | 1.41                  | 1.57                | 72.05                | <i>Reichenbachiella</i>             | <i>Flammeovirgaceae</i>             | <i>Sphingobacteriales</i>           | <i>Sphingobacteria</i>        | <i>Bacteroidetes</i>  | <i>Bacteria</i> |
| Otu0549 | 1.26                                      | 0                              | 0.87              | 0.49                  | 1.5                 | 73.56                | unclass. <i>Bacteroidetes</i>       | unclass. <i>Bacteroidetes</i>       | unclass. <i>Bacteroidetes</i>       | unclass. <i>Bacteroidetes</i> | <i>Bacteroidetes</i>  | <i>Bacteria</i> |
| Otu0110 | 0.55                                      | 1.01                           | 0.82              | 1.13                  | 1.42                | 74.98                | unclass. <i>Rhodobacteraceae</i>    | <i>Rhodobacteraceae</i>             | <i>Rhodobacterales</i>              | <i>Alphaproteobacteria</i>    | <i>Proteobacteria</i> | <i>Bacteria</i> |
| Otu0027 | 1.11                                      | 0                              | 0.77              | 0.69                  | 1.35                | 76.32                | <i>Pseudoalteromonas</i>            | <i>Pseudoalteromonadaceae</i>       | <i>Alteromonadales</i>              | <i>Gammaproteobacteria</i>    | <i>Proteobacteria</i> | <i>Bacteria</i> |
| Otu0123 | 1.08                                      | 0.77                           | 0.77              | 1.23                  | 1.34                | 77.66                | unclass. <i>Gammaproteobacteria</i> | unclass. <i>Gammaproteobacteria</i> | unclass. <i>Gammaproteobacteria</i> | <i>Gammaproteobacteria</i>    | <i>Proteobacteria</i> | <i>Bacteria</i> |
| Otu0041 | 0.88                                      | 0.2                            | 0.74              | 0.89                  | 1.29                | 78.96                | <i>Sulfitobacter</i>                | <i>Rhodobacteraceae</i>             | <i>Rhodobacterales</i>              | <i>Alphaproteobacteria</i>    | <i>Proteobacteria</i> | <i>Bacteria</i> |
| Otu0029 | 1                                         | 0                              | 0.68              | 0.49                  | 1.19                | 80.15                | unclass. <i>Bacteroidetes</i>       | unclass. <i>Bacteroidetes</i>       | unclass. <i>Bacteroidetes</i>       | unclass. <i>Bacteroidetes</i> | <i>Bacteroidetes</i>  | <i>Bacteria</i> |
| Otu0532 | 0.88                                      | 0.48                           | 0.67              | 1.13                  | 1.17                | 81.32                | unclass. <i>Rhodobacteraceae</i>    | <i>Rhodobacteraceae</i>             | <i>Rhodobacterales</i>              | <i>Alphaproteobacteria</i>    | <i>Proteobacteria</i> | <i>Bacteria</i> |
| Otu0548 | 0.98                                      | 0                              | 0.67              | 0.49                  | 1.17                | 82.48                | unclass. <i>Bacteroidetes</i>       | unclass. <i>Bacteroidetes</i>       | unclass. <i>Bacteroidetes</i>       | unclass. <i>Bacteroidetes</i> | <i>Bacteroidetes</i>  | <i>Bacteria</i> |
| Otu0527 | 0.83                                      | 0.2                            | 0.63              | 1.15                  | 1.1                 | 83.58                | <i>Idiomarina</i>                   | <i>Idiomarinaceae</i>               | <i>Alteromonadales</i>              | <i>Gammaproteobacteria</i>    | <i>Proteobacteria</i> | <i>Bacteria</i> |
| Otu0534 | 0.4                                       | 0.69                           | 0.62              | 0.92                  | 1.08                | 84.66                | unclass. <i>Alphaproteobacteria</i> | unclass. <i>Alphaproteobacteria</i> | unclass. <i>Alphaproteobacteria</i> | <i>Alphaproteobacteria</i>    | <i>Proteobacteria</i> | <i>Bacteria</i> |
| Otu0109 | 0.88                                      | 0.6                            | 0.61              | 1.24                  | 1.07                | 85.73                | <i>Alteromonas</i>                  | <i>Alteromonadaceae</i>             | <i>Alteromonadales</i>              | <i>Gammaproteobacteria</i>    | <i>Proteobacteria</i> | <i>Bacteria</i> |
| Otu0529 | 0.48                                      | 0.48                           | 0.49              | 0.97                  | 0.85                | 86.58                | unclass. <i>Sphingobacteriales</i>  | unclass. <i>Sphingobacteriales</i>  | <i>Sphingobacteriales</i>           | <i>Sphingobacteria</i>        | <i>Bacteroidetes</i>  | <i>Bacteria</i> |
| Otu0545 | 0.2                                       | 0.55                           | 0.47              | 0.84                  | 0.82                | 87.4                 | <i>Reinekea</i>                     | <i>Oceanospirillaceae</i>           | <i>Oceanospirillales</i>            | <i>Gammaproteobacteria</i>    | <i>Proteobacteria</i> | <i>Bacteria</i> |
| Otu0538 | 0.48                                      | 0.4                            | 0.47              | 1.01                  | 0.81                | 88.21                | <i>Oceaniserpentilla</i>            | <i>Oceanospirillaceae</i>           | <i>Oceanospirillales</i>            | <i>Gammaproteobacteria</i>    | <i>Proteobacteria</i> | <i>Bacteria</i> |
| Otu0535 | 0.48                                      | 0.4                            | 0.46              | 0.99                  | 0.79                | 89.01                | <i>Loktanelia</i>                   | <i>Rhodobacteraceae</i>             | <i>Rhodobacterales</i>              | <i>Alphaproteobacteria</i>    | <i>Proteobacteria</i> | <i>Bacteria</i> |

| OTU                                                      | Av.A <sub>i</sub><br>(pH <i>in situ</i> ) | Av.A <sub>i</sub><br>(pH 7.67) | Av.δ <sub>i</sub> | Av.δ <sub>i</sub> /SD | Av.δ <sub>i</sub> % | ΣAv.δ <sub>i</sub> % | Genus                               | Family                              | Order                               | Class                          | Phylum                   | Domain          |
|----------------------------------------------------------|-------------------------------------------|--------------------------------|-------------------|-----------------------|---------------------|----------------------|-------------------------------------|-------------------------------------|-------------------------------------|--------------------------------|--------------------------|-----------------|
| Otu0540                                                  | 0.2                                       | 0.4                            | 0.37              | 0.84                  | 0.64                | 89.65                | unclass. <i>Flammeovirgaceae</i>    | <i>Flammeovirgaceae</i>             | <i>Sphingobacteriales</i>           | <i>Sphingobacteria</i>         | <i>Bacteroidetes</i>     | <i>Bacteria</i> |
| Otu0550                                                  | 0.49                                      | 0                              | 0.34              | 0.49                  | 0.58                | 90.23                | unclass. <i>Flavobacteriales</i>    | unclass. <i>Flavobacteriales</i>    | <i>Flavobacteriales</i>             | <i>Flavobacteria</i>           | <i>Bacteroidetes</i>     | <i>Bacteria</i> |
| Summer 'initial dilution' (average dissimilarity: 49.0%) |                                           |                                |                   |                       |                     |                      |                                     |                                     |                                     |                                |                          |                 |
| Otu0551                                                  | 1.57                                      | 6.75                           | 2.46              | 1.36                  | 5.01                | 5.01                 | <i>Arcobacter</i>                   | <i>Campylobacteraceae</i>           | <i>Campylobacterales</i>            | <i>Epsilonproteobacteria</i>   | <i>Proteobacteria</i>    | <i>Bacteria</i> |
| Otu0109                                                  | 18.3                                      | 14.05                          | 2.02              | 1.6                   | 4.12                | 9.13                 | <i>Alteromonas</i>                  | <i>Alteromonadaceae</i>             | <i>Alteromonadales</i>              | <i>Gammaproteobacteria</i>     | <i>Proteobacteria</i>    | <i>Bacteria</i> |
| Otu0588                                                  | 1.8                                       | 4.34                           | 1.23              | 1.84                  | 2.5                 | 11.63                | <i>Amphritea</i>                    | <i>Oceanospirillaceae</i>           | <i>Oceanospirillales</i>            | <i>Gammaproteobacteria</i>     | <i>Proteobacteria</i>    | <i>Bacteria</i> |
| Otu0234                                                  | 0.85                                      | 2.68                           | 1.14              | 0.96                  | 2.33                | 13.96                | <i>Arcobacter</i>                   | <i>Campylobacteraceae</i>           | <i>Campylobacterales</i>            | <i>Epsilonproteobacteria</i>   | <i>Proteobacteria</i>    | <i>Bacteria</i> |
| Otu0041                                                  | 3.93                                      | 2.89                           | 1                 | 1.24                  | 2.04                | 16                   | <i>Sulfitobacter</i>                | <i>Rhodobacteraceae</i>             | <i>Rhodobacterales</i>              | <i>Alphaproteobacteria</i>     | <i>Proteobacteria</i>    | <i>Bacteria</i> |
| Otu0521                                                  | 3.2                                       | 1.98                           | 0.96              | 1.47                  | 1.95                | 17.96                | unclass. <i>Rhodobacteraceae</i>    | <i>Rhodobacteraceae</i>             | <i>Rhodobacterales</i>              | <i>Alphaproteobacteria</i>     | <i>Proteobacteria</i>    | <i>Bacteria</i> |
| Otu0027                                                  | 2.28                                      | 3.93                           | 0.89              | 1.59                  | 1.81                | 19.77                | <i>Pseudoalteromonas</i>            | <i>Pseudoalteromonadaceae</i>       | <i>Alteromonadales</i>              | <i>Gammaproteobacteria</i>     | <i>Proteobacteria</i>    | <i>Bacteria</i> |
| Otu0583                                                  | 1.17                                      | 2.84                           | 0.84              | 1.37                  | 1.71                | 21.47                | unclass. <i>Flavobacteriaceae</i>   | <i>Flavobacteriaceae</i>            | <i>Flavobacteriales</i>             | <i>Flavobacteria</i>           | <i>Bacteroidetes</i>     | <i>Bacteria</i> |
| Otu0576                                                  | 1.81                                      | 3.39                           | 0.8               | 1.4                   | 1.63                | 23.11                | unclass. <i>Alphaproteobacteria</i> | unclass. <i>Alphaproteobacteria</i> | unclass. <i>Alphaproteobacteria</i> | <i>Alphaproteobacteria</i>     | <i>Proteobacteria</i>    | <i>Bacteria</i> |
| Otu0125                                                  | 0.48                                      | 1.32                           | 0.73              | 0.81                  | 1.48                | 24.59                | <i>Leeuwenhoekella</i>              | <i>Flavobacteriaceae</i>            | <i>Flavobacteriales</i>             | <i>Flavobacteria</i>           | <i>Bacteroidetes</i>     | <i>Bacteria</i> |
| Otu0110                                                  | 2.08                                      | 0.85                           | 0.72              | 2.14                  | 1.48                | 26.07                | unclass. <i>Rhodobacteraceae</i>    | <i>Rhodobacteraceae</i>             | <i>Rhodobacterales</i>              | <i>Alphaproteobacteria</i>     | <i>Proteobacteria</i>    | <i>Bacteria</i> |
| Otu0035                                                  | 3.47                                      | 2.9                            | 0.7               | 2.09                  | 1.43                | 27.5                 | <i>Colwellia</i>                    | <i>Colwelliaceae</i>                | <i>Alteromonadales</i>              | <i>Gammaproteobacteria</i>     | <i>Proteobacteria</i>    | <i>Bacteria</i> |
| Otu0578                                                  | 0.97                                      | 2.18                           | 0.64              | 1.34                  | 1.3                 | 28.8                 | <i>Winogradskyella</i>              | <i>Flavobacteriaceae</i>            | <i>Flavobacteriales</i>             | <i>Flavobacteria</i>           | <i>Bacteroidetes</i>     | <i>Bacteria</i> |
| Otu0072                                                  | 0                                         | 1.29                           | 0.62              | 3.46                  | 1.25                | 30.06                | <i>Sulfitobacter</i>                | <i>Rhodobacteraceae</i>             | <i>Rhodobacterales</i>              | <i>Alphaproteobacteria</i>     | <i>Proteobacteria</i>    | <i>Bacteria</i> |
| Otu0597                                                  | 0.55                                      | 1.29                           | 0.61              | 1.02                  | 1.25                | 31.31                | <i>Arenibacter</i>                  | <i>Flavobacteriaceae</i>            | <i>Flavobacteriales</i>             | <i>Flavobacteria</i>           | <i>Bacteroidetes</i>     | <i>Bacteria</i> |
| Otu0346                                                  | 0.68                                      | 1.56                           | 0.58              | 1.35                  | 1.19                | 32.5                 | unclass. <i>Bacteria</i>            | unclass. <i>Bacteria</i>            | unclass. <i>Bacteria</i>            | unclass. <i>Bacteria</i>       | unclass. <i>Bacteria</i> | <i>Bacteria</i> |
| Otu0489                                                  | 1                                         | 2.2                            | 0.58              | 1.41                  | 1.19                | 33.68                | unclass. <i>Vibrionaceae</i>        | <i>Vibrionaceae</i>                 | <i>Vibrionales</i>                  | <i>Gammaproteobacteria</i>     | <i>Proteobacteria</i>    | <i>Bacteria</i> |
| Otu0542                                                  | 1.09                                      | 1.08                           | 0.57              | 1.37                  | 1.17                | 34.85                | unclass. <i>Oceanospirillaceae</i>  | <i>Oceanospirillaceae</i>           | <i>Oceanospirillales</i>            | <i>Gammaproteobacteria</i>     | <i>Proteobacteria</i>    | <i>Bacteria</i> |
| Otu0533                                                  | 0.95                                      | 1.62                           | 0.55              | 1.6                   | 1.12                | 35.98                | <i>Nisaea</i>                       | <i>Rhodospirillaceae</i>            | <i>Rhodospirillales</i>             | <i>Alphaproteobacteria</i>     | <i>Proteobacteria</i>    | <i>Bacteria</i> |
| Otu0532                                                  | 2.73                                      | 2.64                           | 0.55              | 1.35                  | 1.12                | 37.1                 | unclass. <i>Rhodobacteraceae</i>    | <i>Rhodobacteraceae</i>             | <i>Rhodobacterales</i>              | <i>Alphaproteobacteria</i>     | <i>Proteobacteria</i>    | <i>Bacteria</i> |
| Otu0569                                                  | 0.4                                       | 1.11                           | 0.53              | 0.98                  | 1.09                | 38.19                | unclass. <i>Proteobacteria</i>      | unclass. <i>Proteobacteria</i>      | unclass. <i>Proteobacteria</i>      | unclass. <i>Proteobacteria</i> | <i>Proteobacteria</i>    | <i>Bacteria</i> |
| Otu0107                                                  | 1.25                                      | 1.72                           | 0.52              | 1.51                  | 1.07                | 39.26                | unclass. <i>Rhodobacteraceae</i>    | <i>Rhodobacteraceae</i>             | <i>Rhodobacterales</i>              | <i>Alphaproteobacteria</i>     | <i>Proteobacteria</i>    | <i>Bacteria</i> |
| Otu0615                                                  | 1.12                                      | 1.29                           | 0.51              | 1.3                   | 1.04                | 40.3                 | <i>Neptuniibacter</i>               | <i>Oceanospirillaceae</i>           | <i>Oceanospirillales</i>            | <i>Gammaproteobacteria</i>     | <i>Proteobacteria</i>    | <i>Bacteria</i> |
| Otu0525                                                  | 1.62                                      | 2.36                           | 0.49              | 1.42                  | 1                   | 41.3                 | <i>Reinekea</i>                     | <i>Oceanospirillaceae</i>           | <i>Oceanospirillales</i>            | <i>Gammaproteobacteria</i>     | <i>Proteobacteria</i>    | <i>Bacteria</i> |

| OTU     | Av.A <sub>i</sub><br>(pH <i>in situ</i> ) | Av.A <sub>i</sub><br>(pH 7.67) | Av.δ <sub>i</sub> | Av.δ <sub>i</sub> /SD | Av.δ <sub>i</sub> % | ΣAv.δ <sub>i</sub> % | Genus                               | Family                              | Order                               | Class                          | Phylum                | Domain          |
|---------|-------------------------------------------|--------------------------------|-------------------|-----------------------|---------------------|----------------------|-------------------------------------|-------------------------------------|-------------------------------------|--------------------------------|-----------------------|-----------------|
| Otu0460 | 1.32                                      | 1.51                           | 0.48              | 1.06                  | 0.99                | 42.29                | <i>Arcobacter</i>                   | <i>Campylobacteraceae</i>           | <i>Campylobacterales</i>            | <i>Epsilonproteobacteria</i>   | <i>Proteobacteria</i> | <i>Bacteria</i> |
| Otu0553 | 1.75                                      | 2.25                           | 0.46              | 1.52                  | 0.94                | 43.23                | <i>Vibrio</i>                       | <i>Vibrionaceae</i>                 | <i>Vibrionales</i>                  | <i>Gammaproteobacteria</i>     | <i>Proteobacteria</i> | <i>Bacteria</i> |
| Otu0608 | 0.48                                      | 1.21                           | 0.45              | 1.34                  | 0.91                | 44.14                | unclass. <i>Flavobacteriaceae</i>   | <i>Flavobacteriaceae</i>            | <i>Flavobacteriales</i>             | <i>Flavobacteria</i>           | <i>Bacteroidetes</i>  | <i>Bacteria</i> |
| Otu0534 | 0                                         | 0.96                           | 0.45              | 0.83                  | 0.91                | 45.05                | unclass. <i>Alphaproteobacteria</i> | unclass. <i>Alphaproteobacteria</i> | unclass. <i>Alphaproteobacteria</i> | <i>Alphaproteobacteria</i>     | <i>Proteobacteria</i> | <i>Bacteria</i> |
| Otu0459 | 0.68                                      | 1.22                           | 0.43              | 1.21                  | 0.88                | 45.93                | <i>Croceibacter</i>                 | <i>Flavobacteriaceae</i>            | <i>Flavobacteriales</i>             | <i>Flavobacteria</i>           | <i>Bacteroidetes</i>  | <i>Bacteria</i> |
| Otu0584 | 0.55                                      | 0.85                           | 0.41              | 1.11                  | 0.84                | 46.77                | unclass. <i>Proteobacteria</i>      | unclass. <i>Proteobacteria</i>      | unclass. <i>Proteobacteria</i>      | unclass. <i>Proteobacteria</i> | <i>Proteobacteria</i> | <i>Bacteria</i> |
| Otu0112 | 0.4                                       | 0.87                           | 0.4               | 1.27                  | 0.82                | 47.59                | <i>Polaribacter</i>                 | <i>Flavobacteriaceae</i>            | <i>Flavobacteriales</i>             | <i>Flavobacteria</i>           | <i>Bacteroidetes</i>  | <i>Bacteria</i> |
| Otu0261 | 1.24                                      | 1.77                           | 0.39              | 1.14                  | 0.8                 | 48.39                | <i>Winogradskyella</i>              | <i>Flavobacteriaceae</i>            | <i>Flavobacteriales</i>             | <i>Flavobacteria</i>           | <i>Bacteroidetes</i>  | <i>Bacteria</i> |
| Otu0232 | 0.8                                       | 0.35                           | 0.39              | 1.11                  | 0.79                | 49.18                | unclass. <i>Rhodobacteraceae</i>    | <i>Rhodobacteraceae</i>             | <i>Rhodobacterales</i>              | <i>Alphaproteobacteria</i>     | <i>Proteobacteria</i> | <i>Bacteria</i> |
| Otu0113 | 0.55                                      | 0.79                           | 0.39              | 1.1                   | 0.79                | 49.98                | <i>Colwellia</i>                    | <i>Colwelliaceae</i>                | <i>Alteromonadales</i>              | <i>Gammaproteobacteria</i>     | <i>Proteobacteria</i> | <i>Bacteria</i> |
| Otu0103 | 0.6                                       | 0.85                           | 0.38              | 1.42                  | 0.77                | 50.74                | <i>Pseudomonas</i>                  | <i>Pseudomonadaceae</i>             | <i>Pseudomonadales</i>              | <i>Gammaproteobacteria</i>     | <i>Proteobacteria</i> | <i>Bacteria</i> |
| Otu0115 | 2.35                                      | 2.56                           | 0.37              | 2.06                  | 0.76                | 51.51                | <i>Glaciecola</i>                   | <i>Alteromonadaceae</i>             | <i>Alteromonadales</i>              | <i>Gammaproteobacteria</i>     | <i>Proteobacteria</i> | <i>Bacteria</i> |
| Otu0600 | 0.28                                      | 0.85                           | 0.37              | 1.46                  | 0.76                | 52.27                | <i>Jannaschia</i>                   | <i>Rhodobacteraceae</i>             | <i>Rhodobacterales</i>              | <i>Alphaproteobacteria</i>     | <i>Proteobacteria</i> | <i>Bacteria</i> |
| Otu0297 | 0.2                                       | 0.79                           | 0.37              | 1.08                  | 0.76                | 53.02                | <i>Lutibacter</i>                   | <i>Flavobacteriaceae</i>            | <i>Flavobacteriales</i>             | <i>Flavobacteria</i>           | <i>Bacteroidetes</i>  | <i>Bacteria</i> |
| Otu0111 | 0.4                                       | 0.79                           | 0.37              | 1.18                  | 0.75                | 53.77                | <i>Marinomonas</i>                  | <i>Oceanospirillaceae</i>           | <i>Oceanospirillales</i>            | <i>Gammaproteobacteria</i>     | <i>Proteobacteria</i> | <i>Bacteria</i> |
| Otu0580 | 0.91                                      | 1.37                           | 0.37              | 1.3                   | 0.75                | 54.52                | <i>Neptuniibacter</i>               | <i>Oceanospirillaceae</i>           | <i>Oceanospirillales</i>            | <i>Gammaproteobacteria</i>     | <i>Proteobacteria</i> | <i>Bacteria</i> |
| Otu0036 | 0.95                                      | 0.71                           | 0.37              | 1.42                  | 0.74                | 55.27                | <i>Glaciecola</i>                   | <i>Alteromonadaceae</i>             | <i>Alteromonadales</i>              | <i>Gammaproteobacteria</i>     | <i>Proteobacteria</i> | <i>Bacteria</i> |
| Otu0599 | 0.8                                       | 0.35                           | 0.36              | 1.78                  | 0.74                | 56                   | <i>Winogradskyella</i>              | <i>Flavobacteriaceae</i>            | <i>Flavobacteriales</i>             | <i>Flavobacteria</i>           | <i>Bacteroidetes</i>  | <i>Bacteria</i> |
| Otu0263 | 0.4                                       | 0.75                           | 0.36              | 1.01                  | 0.73                | 56.73                | <i>Krokinobacter</i>                | <i>Flavobacteriaceae</i>            | <i>Flavobacteriales</i>             | <i>Flavobacteria</i>           | <i>Bacteroidetes</i>  | <i>Bacteria</i> |
| Otu0626 | 0.2                                       | 0.75                           | 0.35              | 0.95                  | 0.71                | 57.44                | <i>Marinomonas</i>                  | <i>Oceanospirillaceae</i>           | <i>Oceanospirillales</i>            | <i>Gammaproteobacteria</i>     | <i>Proteobacteria</i> | <i>Bacteria</i> |
| Otu0108 | 0                                         | 0.75                           | 0.35              | 1.67                  | 0.71                | 58.15                | unclass. <i>Colwelliaceae</i>       | <i>Colwelliaceae</i>                | <i>Alteromonadales</i>              | <i>Gammaproteobacteria</i>     | <i>Proteobacteria</i> | <i>Bacteria</i> |
| Otu0526 | 0.2                                       | 0.66                           | 0.35              | 0.71                  | 0.71                | 58.86                | <i>Maribacter</i>                   | <i>Flavobacteriaceae</i>            | <i>Flavobacteriales</i>             | <i>Flavobacteria</i>           | <i>Bacteroidetes</i>  | <i>Bacteria</i> |
| Otu0535 | 0.75                                      | 0                              | 0.34              | 0.49                  | 0.69                | 59.55                | <i>Loktanelia</i>                   | <i>Rhodobacteraceae</i>             | <i>Rhodobacterales</i>              | <i>Alphaproteobacteria</i>     | <i>Proteobacteria</i> | <i>Bacteria</i> |
| Otu0536 | 0.4                                       | 1.1                            | 0.34              | 1.3                   | 0.69                | 60.24                | <i>Maribacter</i>                   | <i>Flavobacteriaceae</i>            | <i>Flavobacteriales</i>             | <i>Flavobacteria</i>           | <i>Bacteroidetes</i>  | <i>Bacteria</i> |
| Otu0165 | 0.83                                      | 0.85                           | 0.33              | 1.22                  | 0.68                | 60.92                | <i>Marinomonas</i>                  | <i>Oceanospirillaceae</i>           | <i>Oceanospirillales</i>            | <i>Gammaproteobacteria</i>     | <i>Proteobacteria</i> | <i>Bacteria</i> |
| Otu0577 | 0.73                                      | 0                              | 0.32              | 0.77                  | 0.66                | 61.58                | unclass. <i>Bacteroidetes</i>       | unclass. <i>Bacteroidetes</i>       | unclass. <i>Bacteroidetes</i>       | unclass. <i>Bacteroidetes</i>  | <i>Bacteroidetes</i>  | <i>Bacteria</i> |
| Otu0010 | 0.68                                      | 0                              | 0.3               | 0.78                  | 0.62                | 62.2                 | unclass. <i>Flavobacteriaceae</i>   | <i>Flavobacteriaceae</i>            | <i>Flavobacteriales</i>             | <i>Flavobacteria</i>           | <i>Bacteroidetes</i>  | <i>Bacteria</i> |

| OTU     | Av.A <sub>i</sub><br>(pH <i>in situ</i> ) | Av.A <sub>i</sub><br>(pH 7.67) | Av.δ <sub>i</sub> | Av.δ <sub>i</sub> /SD | Av.δ <sub>i</sub> % | ΣAv.δ <sub>i</sub> % | Genus                             | Family                           | Order                          | Class                          | Phylum                | Domain          |
|---------|-------------------------------------------|--------------------------------|-------------------|-----------------------|---------------------|----------------------|-----------------------------------|----------------------------------|--------------------------------|--------------------------------|-----------------------|-----------------|
| Otu0487 | 2.26                                      | 2.54                           | 0.3               | 1.12                  | 0.62                | 62.82                | unclass. <i>Chitinophagaceae</i>  | <i>Chitinophagaceae</i>          | <i>Sphingobacteriales</i>      | <i>Sphingobacteria</i>         | <i>Bacteroidetes</i>  | <i>Bacteria</i> |
| Otu0434 | 0.4                                       | 0.6                            | 0.29              | 1.05                  | 0.6                 | 63.41                | <i>Maribacter</i>                 | <i>Flavobacteriaceae</i>         | <i>Flavobacteriales</i>        | <i>Flavobacteria</i>           | <i>Bacteroidetes</i>  | <i>Bacteria</i> |
| Otu0244 | 0.55                                      | 0.25                           | 0.29              | 0.87                  | 0.59                | 64.01                | unclass. <i>Rhodobacteraceae</i>  | <i>Rhodobacteraceae</i>          | <i>Rhodobacterales</i>         | <i>Alphaproteobacteria</i>     | <i>Proteobacteria</i> | <i>Bacteria</i> |
| Otu0575 | 0.65                                      | 0                              | 0.29              | 0.71                  | 0.59                | 64.6                 | unclass. <i>Bacteroidetes</i>     | unclass. <i>Bacteroidetes</i>    | unclass. <i>Bacteroidetes</i>  | unclass. <i>Bacteroidetes</i>  | <i>Bacteroidetes</i>  | <i>Bacteria</i> |
| Otu0596 | 0.48                                      | 0.35                           | 0.28              | 0.9                   | 0.58                | 65.17                | <i>Neptunomonas</i>               | <i>Oceanospirillaceae</i>        | <i>Oceanospirillales</i>       | <i>Gammaproteobacteria</i>     | <i>Proteobacteria</i> | <i>Bacteria</i> |
| Otu0649 | 0                                         | 0.6                            | 0.28              | 0.95                  | 0.57                | 65.75                | unclass. <i>Bacteroidetes</i>     | unclass. <i>Bacteroidetes</i>    | unclass. <i>Bacteroidetes</i>  | unclass. <i>Bacteroidetes</i>  | <i>Bacteroidetes</i>  | <i>Bacteria</i> |
| Otu0320 | 0.4                                       | 0.6                            | 0.28              | 1.06                  | 0.57                | 66.32                | <i>Pseudoalteromonas</i>          | <i>Pseudoalteromonadaceae</i>    | <i>Alteromonadales</i>         | <i>Gammaproteobacteria</i>     | <i>Proteobacteria</i> | <i>Bacteria</i> |
| Otu0543 | 0.48                                      | 0.35                           | 0.27              | 0.91                  | 0.56                | 66.88                | <i>Muricauda</i>                  | <i>Flavobacteriaceae</i>         | <i>Flavobacteriales</i>        | <i>Flavobacteria</i>           | <i>Bacteroidetes</i>  | <i>Bacteria</i> |
| Otu0607 | 0.55                                      | 0                              | 0.27              | 0.73                  | 0.55                | 67.43                | unclass. <i>Flavobacteriaceae</i> | <i>Flavobacteriaceae</i>         | <i>Flavobacteriales</i>        | <i>Flavobacteria</i>           | <i>Bacteroidetes</i>  | <i>Bacteria</i> |
| Otu0593 | 0.4                                       | 0.35                           | 0.26              | 0.95                  | 0.53                | 67.96                | <i>Psychroserpens</i>             | <i>Flavobacteriaceae</i>         | <i>Flavobacteriales</i>        | <i>Flavobacteria</i>           | <i>Bacteroidetes</i>  | <i>Bacteria</i> |
| Otu0591 | 0.2                                       | 0.43                           | 0.25              | 0.73                  | 0.52                | 68.47                | <i>Winogradskyella</i>            | <i>Flavobacteriaceae</i>         | <i>Flavobacteriales</i>        | <i>Flavobacteria</i>           | <i>Bacteroidetes</i>  | <i>Bacteria</i> |
| Otu0639 | 0                                         | 0.5                            | 0.25              | 0.97                  | 0.51                | 68.98                | unclass. <i>Rhodobacteraceae</i>  | <i>Rhodobacteraceae</i>          | <i>Rhodobacterales</i>         | <i>Alphaproteobacteria</i>     | <i>Proteobacteria</i> | <i>Bacteria</i> |
| Otu0634 | 0.2                                       | 0.5                            | 0.24              | 0.97                  | 0.5                 | 69.48                | <i>Winogradskyella</i>            | <i>Flavobacteriaceae</i>         | <i>Flavobacteriales</i>        | <i>Flavobacteria</i>           | <i>Bacteroidetes</i>  | <i>Bacteria</i> |
| Otu0544 | 0.2                                       | 0.5                            | 0.24              | 0.97                  | 0.5                 | 69.97                | <i>Alteromonas</i>                | <i>Alteromonadaceae</i>          | <i>Alteromonadales</i>         | <i>Gammaproteobacteria</i>     | <i>Proteobacteria</i> | <i>Bacteria</i> |
| Otu0663 | 0                                         | 0.5                            | 0.24              | 0.97                  | 0.49                | 70.46                | unclass. <i>Proteobacteria</i>    | unclass. <i>Proteobacteria</i>   | unclass. <i>Proteobacteria</i> | unclass. <i>Proteobacteria</i> | <i>Proteobacteria</i> | <i>Bacteria</i> |
| Otu0581 | 0                                         | 0.5                            | 0.23              | 0.97                  | 0.48                | 70.94                | <i>Polaribacter</i>               | <i>Flavobacteriaceae</i>         | <i>Flavobacteriales</i>        | <i>Flavobacteria</i>           | <i>Bacteroidetes</i>  | <i>Bacteria</i> |
| Otu0653 | 0                                         | 0.5                            | 0.23              | 0.97                  | 0.48                | 71.42                | <i>Winogradskyella</i>            | <i>Flavobacteriaceae</i>         | <i>Flavobacteriales</i>        | <i>Flavobacteria</i>           | <i>Bacteroidetes</i>  | <i>Bacteria</i> |
| Otu0324 | 0.48                                      | 0                              | 0.23              | 0.79                  | 0.47                | 71.89                | <i>Nisaea</i>                     | <i>Rhodospirillaceae</i>         | <i>Rhodospirillales</i>        | <i>Alphaproteobacteria</i>     | <i>Proteobacteria</i> | <i>Bacteria</i> |
| Otu0547 | 0.48                                      | 0                              | 0.23              | 0.76                  | 0.47                | 72.36                | <i>Phenylobacterium</i>           | <i>Caulobacteraceae</i>          | <i>Caulobacterales</i>         | <i>Alphaproteobacteria</i>     | <i>Proteobacteria</i> | <i>Bacteria</i> |
| Otu0423 | 0.48                                      | 0                              | 0.22              | 0.77                  | 0.44                | 72.8                 | unclass. <i>Flavobacteriaceae</i> | <i>Flavobacteriaceae</i>         | <i>Flavobacteriales</i>        | <i>Flavobacteria</i>           | <i>Bacteroidetes</i>  | <i>Bacteria</i> |
| Otu0595 | 0.48                                      | 0                              | 0.22              | 0.77                  | 0.44                | 73.24                | unclass. <i>Legionellaceae</i>    | <i>Legionellaceae</i>            | <i>Legionellales</i>           | <i>Gammaproteobacteria</i>     | <i>Proteobacteria</i> | <i>Bacteria</i> |
| Otu0632 | 0.49                                      | 0                              | 0.21              | 0.49                  | 0.44                | 73.67                | unclass. <i>Flavobacteriaceae</i> | <i>Flavobacteriaceae</i>         | <i>Flavobacteriales</i>        | <i>Flavobacteria</i>           | <i>Bacteroidetes</i>  | <i>Bacteria</i> |
| Otu0598 | 0.4                                       | 0.25                           | 0.21              | 0.88                  | 0.44                | 74.11                | <i>Arcobacter</i>                 | <i>Campylobacteraceae</i>        | <i>Campylobacterales</i>       | <i>Epsilonproteobacteria</i>   | <i>Proteobacteria</i> | <i>Bacteria</i> |
| Otu0628 | 0.4                                       | 0.25                           | 0.21              | 0.87                  | 0.43                | 74.54                | <i>Lacinutrix</i>                 | <i>Flavobacteriaceae</i>         | <i>Flavobacteriales</i>        | <i>Flavobacteria</i>           | <i>Bacteroidetes</i>  | <i>Bacteria</i> |
| Otu0555 | 0.4                                       | 0.25                           | 0.21              | 0.88                  | 0.42                | 74.96                | <i>Maricaulis</i>                 | <i>Hyphomonadaceae</i>           | <i>Caulobacterales</i>         | <i>Alphaproteobacteria</i>     | <i>Proteobacteria</i> | <i>Bacteria</i> |
| Otu0641 | 0.28                                      | 0.25                           | 0.2               | 0.75                  | 0.41                | 75.37                | <i>Flavobacterium</i>             | <i>Flavobacteriaceae</i>         | <i>Flavobacteriales</i>        | <i>Flavobacteria</i>           | <i>Bacteroidetes</i>  | <i>Bacteria</i> |
| Otu0568 | 0.4                                       | 0                              | 0.19              | 0.79                  | 0.39                | 75.76                | unclass. <i>Flavobacteriales</i>  | unclass. <i>Flavobacteriales</i> | <i>Flavobacteriales</i>        | <i>Flavobacteria</i>           | <i>Bacteroidetes</i>  | <i>Bacteria</i> |

| OTU     | Av.A <sub>i</sub><br>(pH <i>in situ</i> ) | Av.A <sub>i</sub><br>(pH 7.67) | Av.δ <sub>i</sub> | Av.δ <sub>i</sub> /SD | Av.δ <sub>i</sub> % | ΣAv.δ <sub>i</sub> % | Genus                               | Family                              | Order                               | Class                         | Phylum                   | Domain          |
|---------|-------------------------------------------|--------------------------------|-------------------|-----------------------|---------------------|----------------------|-------------------------------------|-------------------------------------|-------------------------------------|-------------------------------|--------------------------|-----------------|
| Otu0604 | 0.4                                       | 0                              | 0.19              | 0.79                  | 0.39                | 76.15                | unclass. <i>Bacteroidetes</i>       | unclass. <i>Bacteroidetes</i>       | unclass. <i>Bacteroidetes</i>       | unclass. <i>Bacteroidetes</i> | <i>Bacteroidetes</i>     | <i>Bacteria</i> |
| Otu0564 | 0.4                                       | 0                              | 0.18              | 0.49                  | 0.37                | 76.53                | unclass. <i>Bacteroidetes</i>       | unclass. <i>Bacteroidetes</i>       | unclass. <i>Bacteroidetes</i>       | unclass. <i>Bacteroidetes</i> | <i>Bacteroidetes</i>     | <i>Bacteria</i> |
| Otu0616 | 0.4                                       | 0                              | 0.18              | 0.49                  | 0.37                | 76.9                 | unclass. <i>Bacteria</i>            | unclass. <i>Bacteria</i>            | unclass. <i>Bacteria</i>            | unclass. <i>Bacteria</i>      | unclass. <i>Bacteria</i> | <i>Bacteria</i> |
| Otu0582 | 0.4                                       | 0                              | 0.18              | 0.79                  | 0.37                | 77.27                | unclass. <i>Rhodobacteraceae</i>    | <i>Rhodobacteraceae</i>             | <i>Rhodobacterales</i>              | <i>Alphaproteobacteria</i>    | <i>Proteobacteria</i>    | <i>Bacteria</i> |
| Otu0132 | 0                                         | 0.35                           | 0.18              | 0.56                  | 0.37                | 77.64                | unclass. <i>Alteromonadales</i>     | unclass. <i>Alteromonadales</i>     | <i>Alteromonadales</i>              | <i>Gammaproteobacteria</i>    | <i>Proteobacteria</i>    | <i>Bacteria</i> |
| Otu0500 | 0.4                                       | 0                              | 0.18              | 0.79                  | 0.36                | 78                   | <i>Marinobacter</i>                 | <i>Alteromonadaceae</i>             | <i>Alteromonadales</i>              | <i>Gammaproteobacteria</i>    | <i>Proteobacteria</i>    | <i>Bacteria</i> |
| Otu0054 | 0.2                                       | 0.25                           | 0.17              | 0.71                  | 0.34                | 78.34                | <i>Pseudomonas</i>                  | <i>Pseudomonadaceae</i>             | <i>Pseudomonadales</i>              | <i>Gammaproteobacteria</i>    | <i>Proteobacteria</i>    | <i>Bacteria</i> |
| Otu0180 | 0.2                                       | 0.25                           | 0.17              | 0.71                  | 0.34                | 78.68                | <i>Reichenbachiella</i>             | <i>Flammeovirgaceae</i>             | <i>Sphingobacteriales</i>           | <i>Sphingobacteria</i>        | <i>Bacteroidetes</i>     | <i>Bacteria</i> |
| Otu0005 | 0.2                                       | 0.25                           | 0.17              | 0.71                  | 0.34                | 79.02                | <i>Pelagibacter</i>                 | SAR11-clade                         | <i>Rickettsiales</i>                | <i>Alphaproteobacteria</i>    | <i>Proteobacteria</i>    | <i>Bacteria</i> |
| Otu0561 | 0.2                                       | 0.25                           | 0.17              | 0.71                  | 0.34                | 79.36                | <i>Cellulophaga</i>                 | <i>Flavobacteriaceae</i>            | <i>Flavobacteriales</i>             | <i>Flavobacteria</i>          | <i>Bacteroidetes</i>     | <i>Bacteria</i> |
| Otu0603 | 0.2                                       | 0.25                           | 0.17              | 0.71                  | 0.34                | 79.7                 | unclass. <i>Sphingobacteriales</i>  | unclass. <i>Sphingobacteriales</i>  | <i>Sphingobacteriales</i>           | <i>Sphingobacteria</i>        | <i>Bacteroidetes</i>     | <i>Bacteria</i> |
| Otu0631 | 0.2                                       | 0.25                           | 0.17              | 0.71                  | 0.34                | 80.04                | <i>Arcobacter</i>                   | <i>Campylobacteraceae</i>           | <i>Campylobacterales</i>            | <i>Epsilonproteobacteria</i>  | <i>Proteobacteria</i>    | <i>Bacteria</i> |
| Otu0633 | 0.2                                       | 0.25                           | 0.17              | 0.71                  | 0.34                | 80.38                | <i>Neptuniibacter</i>               | <i>Oceanospirillaceae</i>           | <i>Oceanospirillales</i>            | <i>Gammaproteobacteria</i>    | <i>Proteobacteria</i>    | <i>Bacteria</i> |
| Otu0617 | 0.2                                       | 0.25                           | 0.16              | 0.71                  | 0.33                | 80.71                | <i>Algoriphagus</i>                 | <i>Cyclobacteriaceae</i>            | <i>Sphingobacteriales</i>           | <i>Sphingobacteria</i>        | <i>Bacteroidetes</i>     | <i>Bacteria</i> |
| Otu0563 | 0                                         | 0.35                           | 0.16              | 0.56                  | 0.33                | 81.03                | unclass. <i>Oceanospirillaceae</i>  | <i>Oceanospirillaceae</i>           | <i>Oceanospirillales</i>            | <i>Gammaproteobacteria</i>    | <i>Proteobacteria</i>    | <i>Bacteria</i> |
| Otu0680 | 0                                         | 0.35                           | 0.16              | 0.56                  | 0.33                | 81.36                | unclass. <i>Bacteria</i>            | unclass. <i>Bacteria</i>            | unclass. <i>Bacteria</i>            | unclass. <i>Bacteria</i>      | unclass. <i>Bacteria</i> | <i>Bacteria</i> |
| Otu0539 | 0.2                                       | 0.25                           | 0.16              | 0.71                  | 0.32                | 81.68                | unclass. <i>Bacteroidetes</i>       | unclass. <i>Bacteroidetes</i>       | unclass. <i>Bacteroidetes</i>       | unclass. <i>Bacteroidetes</i> | <i>Bacteroidetes</i>     | <i>Bacteria</i> |
| Otu0579 | 0.35                                      | 0                              | 0.16              | 0.49                  | 0.32                | 82                   | unclass. <i>Bacteroidetes</i>       | unclass. <i>Bacteroidetes</i>       | unclass. <i>Bacteroidetes</i>       | unclass. <i>Bacteroidetes</i> | <i>Bacteroidetes</i>     | <i>Bacteria</i> |
| Otu0618 | 0.28                                      | 0                              | 0.13              | 0.49                  | 0.26                | 82.27                | <i>Glaciecola</i>                   | <i>Alteromonadaceae</i>             | <i>Alteromonadales</i>              | <i>Gammaproteobacteria</i>    | <i>Proteobacteria</i>    | <i>Bacteria</i> |
| Otu0574 | 0.28                                      | 0                              | 0.13              | 0.49                  | 0.26                | 82.53                | unclass. <i>Alphaproteobacteria</i> | unclass. <i>Alphaproteobacteria</i> | unclass. <i>Alphaproteobacteria</i> | <i>Alphaproteobacteria</i>    | <i>Proteobacteria</i>    | <i>Bacteria</i> |
| Otu0585 | 0.28                                      | 0                              | 0.13              | 0.49                  | 0.26                | 82.79                | <i>Neptuniibacter</i>               | <i>Oceanospirillaceae</i>           | <i>Oceanospirillales</i>            | <i>Gammaproteobacteria</i>    | <i>Proteobacteria</i>    | <i>Bacteria</i> |
| Otu0127 | 0                                         | 0.25                           | 0.13              | 0.56                  | 0.26                | 83.05                | <i>Pseudomonas</i>                  | <i>Pseudomonadaceae</i>             | <i>Pseudomonadales</i>              | <i>Gammaproteobacteria</i>    | <i>Proteobacteria</i>    | <i>Bacteria</i> |
| Otu0301 | 0                                         | 0.25                           | 0.13              | 0.56                  | 0.26                | 83.31                | <i>Paracoccus</i>                   | <i>Rhodobacteraceae</i>             | <i>Rhodobacterales</i>              | <i>Alphaproteobacteria</i>    | <i>Proteobacteria</i>    | <i>Bacteria</i> |
| Otu0545 | 0                                         | 0.25                           | 0.13              | 0.56                  | 0.26                | 83.57                | <i>Reinekea</i>                     | <i>Oceanospirillaceae</i>           | <i>Oceanospirillales</i>            | <i>Gammaproteobacteria</i>    | <i>Proteobacteria</i>    | <i>Bacteria</i> |
| Otu0606 | 0                                         | 0.25                           | 0.13              | 0.56                  | 0.26                | 83.83                | <i>Polaribacter</i>                 | <i>Flavobacteriaceae</i>            | <i>Flavobacteriales</i>             | <i>Flavobacteria</i>          | <i>Bacteroidetes</i>     | <i>Bacteria</i> |
| Otu0646 | 0                                         | 0.25                           | 0.13              | 0.56                  | 0.26                | 84.09                | unclass. <i>Rhodobacteraceae</i>    | <i>Rhodobacteraceae</i>             | <i>Rhodobacterales</i>              | <i>Alphaproteobacteria</i>    | <i>Proteobacteria</i>    | <i>Bacteria</i> |
| Otu0675 | 0                                         | 0.25                           | 0.13              | 0.56                  | 0.26                | 84.35                | unclass. <i>Flavobacteriales</i>    | unclass. <i>Flavobacteriales</i>    | <i>Flavobacteriales</i>             | <i>Flavobacteria</i>          | <i>Bacteroidetes</i>     | <i>Bacteria</i> |



| OTU                                                 | Av.A <sub>i</sub><br>(pH <i>in situ</i> ) | Av.A <sub>i</sub><br>(pH 7.67) | Av.δ <sub>i</sub> | Av.δ <sub>i</sub> /SD | Av.δ <sub>i</sub> % | ΣAv.δ <sub>i</sub> % | Genus                               | Family                              | Order                               | Class                        | Phylum                   | Domain          |
|-----------------------------------------------------|-------------------------------------------|--------------------------------|-------------------|-----------------------|---------------------|----------------------|-------------------------------------|-------------------------------------|-------------------------------------|------------------------------|--------------------------|-----------------|
| Otu0676                                             | 0                                         | 0.25                           | 0.13              | 0.56                  | 0.26                | 84.6                 | unclass. <i>Bacteria</i>            | unclass. <i>Bacteria</i>            | unclass. <i>Bacteria</i>            | unclass. <i>Bacteria</i>     | unclass. <i>Bacteria</i> | <i>Bacteria</i> |
| Otu0678                                             | 0                                         | 0.25                           | 0.13              | 0.56                  | 0.26                | 84.86                | <i>Alteromonas</i>                  | <i>Alteromonadaceae</i>             | <i>Alteromonadales</i>              | <i>Gammaproteobacteria</i>   | <i>Proteobacteria</i>    | <i>Bacteria</i> |
| Otu0679                                             | 0                                         | 0.25                           | 0.13              | 0.56                  | 0.26                | 85.12                | unclass. <i>Rhodobacteraceae</i>    | <i>Rhodobacteraceae</i>             | <i>Rhodobacterales</i>              | <i>Alphaproteobacteria</i>   | <i>Proteobacteria</i>    | <i>Bacteria</i> |
| Otu0635                                             | 0.28                                      | 0                              | 0.12              | 0.49                  | 0.25                | 85.37                | unclass. <i>Rhodobacteraceae</i>    | <i>Rhodobacteraceae</i>             | <i>Rhodobacterales</i>              | <i>Alphaproteobacteria</i>   | <i>Proteobacteria</i>    | <i>Bacteria</i> |
| Otu0644                                             | 0.28                                      | 0                              | 0.12              | 0.49                  | 0.25                | 85.63                | <i>Polaribacter</i>                 | <i>Flavobacteriaceae</i>            | <i>Flavobacteriales</i>             | <i>Flavobacteria</i>         | <i>Bacteroidetes</i>     | <i>Bacteria</i> |
| Otu0039                                             | 0                                         | 0.25                           | 0.12              | 0.56                  | 0.25                | 85.87                | <i>Pseudoalteromonas</i>            | <i>Pseudoalteromonadaceae</i>       | <i>Alteromonadales</i>              | <i>Gammaproteobacteria</i>   | <i>Proteobacteria</i>    | <i>Bacteria</i> |
| Otu0124                                             | 0                                         | 0.25                           | 0.12              | 0.56                  | 0.25                | 86.12                | <i>Loktanelia</i>                   | <i>Rhodobacteraceae</i>             | <i>Rhodobacterales</i>              | <i>Alphaproteobacteria</i>   | <i>Proteobacteria</i>    | <i>Bacteria</i> |
| Otu0189                                             | 0                                         | 0.25                           | 0.12              | 0.56                  | 0.25                | 86.37                | <i>Psychrobacter</i>                | <i>Moraxellaceae</i>                | <i>Pseudomonadales</i>              | <i>Gammaproteobacteria</i>   | <i>Proteobacteria</i>    | <i>Bacteria</i> |
| Otu0193                                             | 0                                         | 0.25                           | 0.12              | 0.56                  | 0.25                | 86.61                | unclass. <i>Rhodobacteraceae</i>    | <i>Rhodobacteraceae</i>             | <i>Rhodobacterales</i>              | <i>Alphaproteobacteria</i>   | <i>Proteobacteria</i>    | <i>Bacteria</i> |
| Otu0645                                             | 0                                         | 0.25                           | 0.12              | 0.56                  | 0.25                | 86.86                | <i>Arcobacter</i>                   | <i>Campylobacteraceae</i>           | <i>Campylobacterales</i>            | <i>Epsilonproteobacteria</i> | <i>Proteobacteria</i>    | <i>Bacteria</i> |
| Otu0647                                             | 0                                         | 0.25                           | 0.12              | 0.56                  | 0.25                | 87.1                 | <i>Maribacter</i>                   | <i>Flavobacteriaceae</i>            | <i>Flavobacteriales</i>             | <i>Flavobacteria</i>         | <i>Bacteroidetes</i>     | <i>Bacteria</i> |
| Otu0648                                             | 0                                         | 0.25                           | 0.12              | 0.56                  | 0.25                | 87.35                | <i>Terasakiella</i>                 | <i>Methylocystaceae</i>             | <i>Rhizobiales</i>                  | <i>Alphaproteobacteria</i>   | <i>Proteobacteria</i>    | <i>Bacteria</i> |
| Otu0652                                             | 0                                         | 0.25                           | 0.12              | 0.56                  | 0.25                | 87.6                 | <i>Marinobacter</i>                 | <i>Alteromonadaceae</i>             | <i>Alteromonadales</i>              | <i>Gammaproteobacteria</i>   | <i>Proteobacteria</i>    | <i>Bacteria</i> |
| Otu0654                                             | 0                                         | 0.25                           | 0.12              | 0.56                  | 0.25                | 87.84                | <i>Marinobacter</i>                 | <i>Alteromonadaceae</i>             | <i>Alteromonadales</i>              | <i>Gammaproteobacteria</i>   | <i>Proteobacteria</i>    | <i>Bacteria</i> |
| Otu0207                                             | 0                                         | 0.25                           | 0.11              | 0.56                  | 0.23                | 88.08                | unclass. <i>Flavobacteriaceae</i>   | <i>Flavobacteriaceae</i>            | <i>Flavobacteriales</i>             | <i>Flavobacteria</i>         | <i>Bacteroidetes</i>     | <i>Bacteria</i> |
| Otu0554                                             | 0                                         | 0.25                           | 0.11              | 0.56                  | 0.23                | 88.31                | unclass. <i>Rhodobacteraceae</i>    | <i>Rhodobacteraceae</i>             | <i>Rhodobacterales</i>              | <i>Alphaproteobacteria</i>   | <i>Proteobacteria</i>    | <i>Bacteria</i> |
| Otu0592                                             | 0                                         | 0.25                           | 0.11              | 0.56                  | 0.23                | 88.54                | <i>Pseudidiomarina</i>              | <i>Idiomarinaceae</i>               | <i>Alteromonadales</i>              | <i>Gammaproteobacteria</i>   | <i>Proteobacteria</i>    | <i>Bacteria</i> |
| Otu0681                                             | 0                                         | 0.25                           | 0.11              | 0.56                  | 0.23                | 88.77                | unclass. <i>Bacteria</i>            | unclass. <i>Bacteria</i>            | unclass. <i>Bacteria</i>            | unclass. <i>Bacteria</i>     | unclass. <i>Bacteria</i> | <i>Bacteria</i> |
| Otu0683                                             | 0                                         | 0.25                           | 0.11              | 0.56                  | 0.23                | 89                   | <i>Tenacibaculum</i>                | <i>Flavobacteriaceae</i>            | <i>Flavobacteriales</i>             | <i>Flavobacteria</i>         | <i>Bacteroidetes</i>     | <i>Bacteria</i> |
| Otu0684                                             | 0                                         | 0.25                           | 0.11              | 0.56                  | 0.23                | 89.23                | unclass. <i>Rhodobacteraceae</i>    | <i>Rhodobacteraceae</i>             | <i>Rhodobacterales</i>              | <i>Alphaproteobacteria</i>   | <i>Proteobacteria</i>    | <i>Bacteria</i> |
| Otu0685                                             | 0                                         | 0.25                           | 0.11              | 0.56                  | 0.23                | 89.46                | unclass. <i>Alphaproteobacteria</i> | unclass. <i>Alphaproteobacteria</i> | unclass. <i>Alphaproteobacteria</i> | <i>Alphaproteobacteria</i>   | <i>Proteobacteria</i>    | <i>Bacteria</i> |
| Otu0686                                             | 0                                         | 0.25                           | 0.11              | 0.56                  | 0.23                | 89.69                | <i>Marinomonas</i>                  | <i>Oceanospirillaceae</i>           | <i>Oceanospirillales</i>            | <i>Gammaproteobacteria</i>   | <i>Proteobacteria</i>    | <i>Bacteria</i> |
| Otu0687                                             | 0                                         | 0.25                           | 0.11              | 0.56                  | 0.23                | 89.92                | unclass. <i>Bacteria</i>            | unclass. <i>Bacteria</i>            | unclass. <i>Bacteria</i>            | unclass. <i>Bacteria</i>     | unclass. <i>Bacteria</i> | <i>Bacteria</i> |
| Otu0688                                             | 0                                         | 0.25                           | 0.11              | 0.56                  | 0.23                | 90.16                | unclass. <i>Oceanospirillaceae</i>  | <i>Oceanospirillaceae</i>           | <i>Oceanospirillales</i>            | <i>Gammaproteobacteria</i>   | <i>Proteobacteria</i>    | <i>Bacteria</i> |
| Autumn 'no dilution' (average dissimilarity: 62.8%) |                                           |                                |                   |                       |                     |                      |                                     |                                     |                                     |                              |                          |                 |
| Otu1090                                             | 5.7                                       | 2.33                           | 0.63              | 3.11                  | 1                   | 1                    | unclass. <i>Bacteria</i>            | unclass. <i>Bacteria</i>            | unclass. <i>Bacteria</i>            | unclass. <i>Bacteria</i>     | unclass. <i>Bacteria</i> | <i>Bacteria</i> |
| Otu0001                                             | 4.28                                      | 1.18                           | 0.6               | 1.37                  | 0.96                | 1.96                 | unclass. <i>Flavobacteriaceae</i>   | <i>Flavobacteriaceae</i>            | <i>Flavobacteriales</i>             | <i>Flavobacteria</i>         | <i>Bacteroidetes</i>     | <i>Bacteria</i> |

| OTU     | Av.A <sub>i</sub><br>(pH <i>in situ</i> ) | Av.A <sub>i</sub><br>(pH 7.67) | Av.δ <sub>i</sub> | Av.δ <sub>i</sub> /SD | Av.δ <sub>i</sub> % | ΣAv.δ <sub>i</sub> % | Genus                               | Family                              | Order                               | Class                          | Phylum                   | Domain          |
|---------|-------------------------------------------|--------------------------------|-------------------|-----------------------|---------------------|----------------------|-------------------------------------|-------------------------------------|-------------------------------------|--------------------------------|--------------------------|-----------------|
| Otu0735 | 0                                         | 2.76                           | 0.52              | 4.3                   | 0.83                | 2.79                 | unclass. <i>Gammaproteobacteria</i> | unclass. <i>Gammaproteobacteria</i> | unclass. <i>Gammaproteobacteria</i> | <i>Gammaproteobacteria</i>     | <i>Proteobacteria</i>    | <i>Bacteria</i> |
| Otu0005 | 4.32                                      | 3.46                           | 0.43              | 1.34                  | 0.68                | 3.47                 | <i>Pelagibacter</i>                 | SAR11-clade                         | <i>Rickettsiales</i>                | <i>Alphaproteobacteria</i>     | <i>Proteobacteria</i>    | <i>Bacteria</i> |
| Otu0691 | 1.94                                      | 4.06                           | 0.4               | 1.86                  | 0.64                | 4.11                 | <i>Planctomyces</i>                 | <i>Planctomycetaceae</i>            | <i>Planctomycetales</i>             | <i>Planctomycetacia</i>        | <i>Planctomycetes</i>    | <i>Bacteria</i> |
| Otu0272 | 3.28                                      | 1.31                           | 0.4               | 2.05                  | 0.63                | 4.74                 | unclass. <i>Flavobacteriaceae</i>   | <i>Flavobacteriaceae</i>            | <i>Flavobacteriales</i>             | <i>Flavobacteria</i>           | <i>Bacteroidetes</i>     | <i>Bacteria</i> |
| Otu0830 | 0.2                                       | 2.18                           | 0.37              | 2.88                  | 0.6                 | 5.33                 | unclass. <i>Gammaproteobacteria</i> | unclass. <i>Gammaproteobacteria</i> | unclass. <i>Gammaproteobacteria</i> | <i>Gammaproteobacteria</i>     | <i>Proteobacteria</i>    | <i>Bacteria</i> |
| Otu0408 | 2.67                                      | 0.68                           | 0.37              | 3.28                  | 0.6                 | 5.93                 | unclass. <i>Flavobacteriaceae</i>   | <i>Flavobacteriaceae</i>            | <i>Flavobacteriales</i>             | <i>Flavobacteria</i>           | <i>Bacteroidetes</i>     | <i>Bacteria</i> |
| Otu0983 | 2.52                                      | 0.55                           | 0.37              | 2.04                  | 0.59                | 6.52                 | unclass. <i>Flavobacteriales</i>    | unclass. <i>Flavobacteriales</i>    | <i>Flavobacteriales</i>             | <i>Flavobacteria</i>           | <i>Bacteroidetes</i>     | <i>Bacteria</i> |
| Otu0765 | 0.68                                      | 2.45                           | 0.33              | 2.5                   | 0.53                | 7.04                 | <i>Pelagicoccus</i>                 | <i>Puniceicoccaceae</i>             | <i>Puniceococcales</i>              | <i>Opitutae</i>                | <i>Verrucomicrobia</i>   | <i>Bacteria</i> |
| Otu0776 | 1.76                                      | 0                              | 0.33              | 3.23                  | 0.52                | 7.57                 | unclass. <i>Proteobacteria</i>      | unclass. <i>Proteobacteria</i>      | unclass. <i>Proteobacteria</i>      | unclass. <i>Proteobacteria</i> | <i>Proteobacteria</i>    | <i>Bacteria</i> |
| Otu0764 | 2.18                                      | 0.48                           | 0.32              | 2.61                  | 0.51                | 8.08                 | unclass. <i>Proteobacteria</i>      | unclass. <i>Proteobacteria</i>      | unclass. <i>Proteobacteria</i>      | unclass. <i>Proteobacteria</i> | <i>Proteobacteria</i>    | <i>Bacteria</i> |
| Otu1092 | 1.84                                      | 1.89                           | 0.31              | 1.14                  | 0.5                 | 8.58                 | <i>Cycloclasticus</i>               | <i>Piscirickettsiaceae</i>          | <i>Thiotrichales</i>                | <i>Gammaproteobacteria</i>     | <i>Proteobacteria</i>    | <i>Bacteria</i> |
| Otu0494 | 2.08                                      | 0.48                           | 0.3               | 1.65                  | 0.48                | 9.06                 | unclass. <i>Flavobacteriaceae</i>   | <i>Flavobacteriaceae</i>            | <i>Flavobacteriales</i>             | <i>Flavobacteria</i>           | <i>Bacteroidetes</i>     | <i>Bacteria</i> |
| Otu0823 | 3.6                                       | 4.66                           | 0.29              | 2.11                  | 0.46                | 9.52                 | unclass. <i>Legionellaceae</i>      | <i>Legionellaceae</i>               | <i>Legionellales</i>                | <i>Gammaproteobacteria</i>     | <i>Proteobacteria</i>    | <i>Bacteria</i> |
| Otu0467 | 2.24                                      | 1.01                           | 0.28              | 1.48                  | 0.45                | 9.97                 | unclass. <i>Rhodospirillaceae</i>   | <i>Rhodospirillaceae</i>            | <i>Rhodospirillales</i>             | <i>Alphaproteobacteria</i>     | <i>Proteobacteria</i>    | <i>Bacteria</i> |
| Otu1062 | 0.2                                       | 1.68                           | 0.28              | 2.38                  | 0.45                | 10.42                | unclass. <i>Gammaproteobacteria</i> | unclass. <i>Gammaproteobacteria</i> | unclass. <i>Gammaproteobacteria</i> | <i>Gammaproteobacteria</i>     | <i>Proteobacteria</i>    | <i>Bacteria</i> |
| Otu0972 | 1.48                                      | 0                              | 0.28              | 3.46                  | 0.44                | 10.86                | <i>Nisaea</i>                       | <i>Rhodospirillaceae</i>            | <i>Rhodospirillales</i>             | <i>Alphaproteobacteria</i>     | <i>Proteobacteria</i>    | <i>Bacteria</i> |
| Otu0261 | 1.17                                      | 2.47                           | 0.26              | 1.44                  | 0.41                | 11.27                | <i>Winogradskyella</i>              | <i>Flavobacteriaceae</i>            | <i>Flavobacteriales</i>             | <i>Flavobacteria</i>           | <i>Bacteroidetes</i>     | <i>Bacteria</i> |
| Otu1105 | 1.37                                      | 0                              | 0.26              | 4.09                  | 0.41                | 11.68                | unclass. <i>Proteobacteria</i>      | unclass. <i>Proteobacteria</i>      | unclass. <i>Proteobacteria</i>      | unclass. <i>Proteobacteria</i> | <i>Proteobacteria</i>    | <i>Bacteria</i> |
| Otu1102 | 0.93                                      | 1.21                           | 0.25              | 1.19                  | 0.4                 | 12.08                | unclass. <i>Proteobacteria</i>      | unclass. <i>Proteobacteria</i>      | unclass. <i>Proteobacteria</i>      | unclass. <i>Proteobacteria</i> | <i>Proteobacteria</i>    | <i>Bacteria</i> |
| Otu0495 | 0.4                                       | 1.71                           | 0.25              | 1.53                  | 0.4                 | 12.47                | unclass. <i>Flavobacteriales</i>    | unclass. <i>Flavobacteriales</i>    | <i>Flavobacteriales</i>             | <i>Flavobacteria</i>           | <i>Bacteroidetes</i>     | <i>Bacteria</i> |
| Otu0681 | 2.85                                      | 1.59                           | 0.25              | 1.52                  | 0.39                | 12.87                | unclass. <i>Bacteria</i>            | unclass. <i>Bacteria</i>            | unclass. <i>Bacteria</i>            | unclass. <i>Bacteria</i>       | unclass. <i>Bacteria</i> | <i>Bacteria</i> |
| Otu0705 | 2.29                                      | 2.94                           | 0.25              | 1.13                  | 0.39                | 13.26                | <i>Planctomyces</i>                 | <i>Planctomycetaceae</i>            | <i>Planctomycetales</i>             | <i>Planctomycetacia</i>        | <i>Planctomycetes</i>    | <i>Bacteria</i> |
| Otu0157 | 1.04                                      | 1.46                           | 0.24              | 1.22                  | 0.39                | 13.65                | unclass. <i>Gammaproteobacteria</i> | unclass. <i>Gammaproteobacteria</i> | unclass. <i>Gammaproteobacteria</i> | <i>Gammaproteobacteria</i>     | <i>Proteobacteria</i>    | <i>Bacteria</i> |
| Otu1097 | 1.77                                      | 0.48                           | 0.24              | 1.84                  | 0.39                | 14.03                | unclass. <i>Proteobacteria</i>      | unclass. <i>Proteobacteria</i>      | unclass. <i>Proteobacteria</i>      | unclass. <i>Proteobacteria</i> | <i>Proteobacteria</i>    | <i>Bacteria</i> |
| Otu0003 | 0                                         | 1.21                           | 0.23              | 1.38                  | 0.37                | 14.4                 | unclass. <i>Rhodobacteraceae</i>    | <i>Rhodobacteraceae</i>             | <i>Rhodobacterales</i>              | <i>Alphaproteobacteria</i>     | <i>Proteobacteria</i>    | <i>Bacteria</i> |
| Otu1386 | 0                                         | 1.21                           | 0.23              | 1.11                  | 0.36                | 14.76                | unclass. <i>Bacteria</i>            | unclass. <i>Bacteria</i>            | unclass. <i>Bacteria</i>            | unclass. <i>Bacteria</i>       | unclass. <i>Bacteria</i> | <i>Bacteria</i> |
| Otu0359 | 0.48                                      | 1.68                           | 0.23              | 1.85                  | 0.36                | 15.13                | unclass. <i>Gammaproteobacteria</i> | unclass. <i>Gammaproteobacteria</i> | unclass. <i>Gammaproteobacteria</i> | <i>Gammaproteobacteria</i>     | <i>Proteobacteria</i>    | <i>Bacteria</i> |

| OTU     | Av.A <sub>i</sub><br>(pH <i>in situ</i> ) | Av.A <sub>i</sub><br>(pH 7.67) | Av.δ <sub>i</sub> | Av.δ <sub>i</sub> /SD | Av.δ <sub>i</sub> % | ΣAv.δ <sub>i</sub> % | Genus                               | Family                              | Order                               | Class                         | Phylum                   | Domain          |
|---------|-------------------------------------------|--------------------------------|-------------------|-----------------------|---------------------|----------------------|-------------------------------------|-------------------------------------|-------------------------------------|-------------------------------|--------------------------|-----------------|
| Otu1350 | 0.4                                       | 1.18                           | 0.22              | 1.1                   | 0.36                | 15.48                | unclass. <i>Bacteria</i>            | unclass. <i>Bacteria</i>            | unclass. <i>Bacteria</i>            | unclass. <i>Bacteria</i>      | unclass. <i>Bacteria</i> | <i>Bacteria</i> |
| Otu0134 | 0                                         | 1.17                           | 0.22              | 1.43                  | 0.35                | 15.84                | unclass. <i>Gammaproteobacteria</i> | unclass. <i>Gammaproteobacteria</i> | unclass. <i>Gammaproteobacteria</i> | <i>Gammaproteobacteria</i>    | <i>Proteobacteria</i>    | <i>Bacteria</i> |
| Otu0156 | 0.2                                       | 1.29                           | 0.22              | 1.37                  | 0.35                | 16.19                | unclass. <i>Gammaproteobacteria</i> | unclass. <i>Gammaproteobacteria</i> | unclass. <i>Gammaproteobacteria</i> | <i>Gammaproteobacteria</i>    | <i>Proteobacteria</i>    | <i>Bacteria</i> |
| Otu0895 | 0                                         | 1.18                           | 0.22              | 1.78                  | 0.35                | 16.54                | unclass. <i>Actinobacteria</i>      | unclass. <i>Actinobacteria</i>      | unclass. <i>Actinobacteria</i>      | <i>Actinobacteria</i>         | <i>Actinobacteria</i>    | <i>Bacteria</i> |
| Otu0053 | 3.86                                      | 2.81                           | 0.21              | 1.34                  | 0.34                | 16.88                | unclass. <i>Rhodobacteraceae</i>    | <i>Rhodobacteraceae</i>             | <i>Rhodobacterales</i>              | <i>Alphaproteobacteria</i>    | <i>Proteobacteria</i>    | <i>Bacteria</i> |
| Otu0849 | 0.35                                      | 1.21                           | 0.21              | 1.51                  | 0.33                | 17.22                | unclass. <i>Alphaproteobacteria</i> | unclass. <i>Alphaproteobacteria</i> | unclass. <i>Alphaproteobacteria</i> | <i>Alphaproteobacteria</i>    | <i>Proteobacteria</i>    | <i>Bacteria</i> |
| Otu0771 | 1.48                                      | 0.4                            | 0.21              | 1.56                  | 0.33                | 17.55                | unclass. <i>Rhodobacteraceae</i>    | <i>Rhodobacteraceae</i>             | <i>Rhodobacterales</i>              | <i>Alphaproteobacteria</i>    | <i>Proteobacteria</i>    | <i>Bacteria</i> |
| Otu0960 | 1.23                                      | 0.2                            | 0.21              | 1.58                  | 0.33                | 17.88                | unclass. <i>Bacteria</i>            | unclass. <i>Bacteria</i>            | unclass. <i>Bacteria</i>            | unclass. <i>Bacteria</i>      | unclass. <i>Bacteria</i> | <i>Bacteria</i> |
| Otu1100 | 1.09                                      | 0                              | 0.21              | 1.68                  | 0.33                | 18.2                 | unclass. <i>Planctomycetaceae</i>   | <i>Planctomycetaceae</i>            | <i>Planctomycetales</i>             | <i>Planctomycetacia</i>       | <i>Planctomycetes</i>    | <i>Bacteria</i> |
| Otu0450 | 0                                         | 1.09                           | 0.2               | 1.69                  | 0.33                | 18.53                | <i>Sphingobium</i>                  | <i>Sphingomonadaceae</i>            | <i>Sphingomonadales</i>             | <i>Alphaproteobacteria</i>    | <i>Proteobacteria</i>    | <i>Bacteria</i> |
| Otu1081 | 1.66                                      | 1.68                           | 0.2               | 1.53                  | 0.32                | 18.85                | unclass. <i>Flavobacteriales</i>    | unclass. <i>Flavobacteriales</i>    | <i>Flavobacteriales</i>             | <i>Flavobacteria</i>          | <i>Bacteroidetes</i>     | <i>Bacteria</i> |
| Otu1217 | 0.85                                      | 0.53                           | 0.2               | 0.89                  | 0.32                | 19.17                | unclass. <i>Alteromonadales</i>     | unclass. <i>Alteromonadales</i>     | <i>Alteromonadales</i>              | <i>Gammaproteobacteria</i>    | <i>Proteobacteria</i>    | <i>Bacteria</i> |
| Otu0194 | 0.4                                       | 1.29                           | 0.2               | 1.27                  | 0.32                | 19.49                | unclass. <i>Bacteroidetes</i>       | unclass. <i>Bacteroidetes</i>       | unclass. <i>Bacteroidetes</i>       | unclass. <i>Bacteroidetes</i> | <i>Bacteroidetes</i>     | <i>Bacteria</i> |
| Otu0139 | 0                                         | 1.04                           | 0.2               | 1.05                  | 0.31                | 19.8                 | unclass. <i>Gammaproteobacteria</i> | unclass. <i>Gammaproteobacteria</i> | unclass. <i>Gammaproteobacteria</i> | <i>Gammaproteobacteria</i>    | <i>Proteobacteria</i>    | <i>Bacteria</i> |
| Otu1209 | 0                                         | 1.03                           | 0.19              | 1.74                  | 0.31                | 20.11                | unclass. <i>Bacteria</i>            | unclass. <i>Bacteria</i>            | unclass. <i>Bacteria</i>            | unclass. <i>Bacteria</i>      | unclass. <i>Bacteria</i> | <i>Bacteria</i> |
| Otu0710 | 1.24                                      | 1.89                           | 0.19              | 1.31                  | 0.31                | 20.41                | unclass. <i>Gammaproteobacteria</i> | unclass. <i>Gammaproteobacteria</i> | unclass. <i>Gammaproteobacteria</i> | <i>Gammaproteobacteria</i>    | <i>Proteobacteria</i>    | <i>Bacteria</i> |
| Otu1125 | 1.11                                      | 1.53                           | 0.19              | 1.29                  | 0.31                | 20.72                | <i>Planctomyces</i>                 | <i>Planctomycetaceae</i>            | <i>Planctomycetales</i>             | <i>Planctomycetacia</i>       | <i>Planctomycetes</i>    | <i>Bacteria</i> |
| Otu0840 | 1.01                                      | 0                              | 0.19              | 0.8                   | 0.3                 | 21.02                | unclass. <i>Flavobacteriaceae</i>   | <i>Flavobacteriaceae</i>            | <i>Flavobacteriales</i>             | <i>Flavobacteria</i>          | <i>Bacteroidetes</i>     | <i>Bacteria</i> |
| Otu0758 | 0.69                                      | 1.37                           | 0.19              | 1.82                  | 0.3                 | 21.33                | unclass. <i>Bacteria</i>            | unclass. <i>Bacteria</i>            | unclass. <i>Bacteria</i>            | unclass. <i>Bacteria</i>      | unclass. <i>Bacteria</i> | <i>Bacteria</i> |
| Otu0611 | 0.83                                      | 0.49                           | 0.19              | 1.24                  | 0.3                 | 21.63                | unclass. <i>Bacteroidetes</i>       | unclass. <i>Bacteroidetes</i>       | unclass. <i>Bacteroidetes</i>       | unclass. <i>Bacteroidetes</i> | <i>Bacteroidetes</i>     | <i>Bacteria</i> |
| Otu0898 | 1.13                                      | 1.04                           | 0.19              | 1.36                  | 0.3                 | 21.92                | <i>Sphingopyxis</i>                 | <i>Sphingomonadaceae</i>            | <i>Sphingomonadales</i>             | <i>Alphaproteobacteria</i>    | <i>Proteobacteria</i>    | <i>Bacteria</i> |
| Otu1219 | 0.88                                      | 0.6                            | 0.19              | 1.35                  | 0.29                | 22.22                | unclass. <i>Bacteria</i>            | unclass. <i>Bacteria</i>            | unclass. <i>Bacteria</i>            | unclass. <i>Bacteria</i>      | unclass. <i>Bacteria</i> | <i>Bacteria</i> |
| Otu0621 | 1.15                                      | 0.6                            | 0.18              | 1.39                  | 0.29                | 22.51                | <i>Colwellia</i>                    | <i>Colwelliaceae</i>                | <i>Alteromonadales</i>              | <i>Gammaproteobacteria</i>    | <i>Proteobacteria</i>    | <i>Bacteria</i> |
| Otu0947 | 0.8                                       | 0.28                           | 0.18              | 0.64                  | 0.29                | 22.8                 | unclass. <i>Bacteroidetes</i>       | unclass. <i>Bacteroidetes</i>       | unclass. <i>Bacteroidetes</i>       | unclass. <i>Bacteroidetes</i> | <i>Bacteroidetes</i>     | <i>Bacteria</i> |
| Otu0714 | 3.04                                      | 2.12                           | 0.18              | 1.81                  | 0.28                | 23.08                | unclass. <i>Alphaproteobacteria</i> | unclass. <i>Alphaproteobacteria</i> | unclass. <i>Alphaproteobacteria</i> | <i>Alphaproteobacteria</i>    | <i>Proteobacteria</i>    | <i>Bacteria</i> |
| Otu0517 | 0.2                                       | 1.05                           | 0.18              | 1.6                   | 0.28                | 23.36                | unclass. <i>Bacteroidetes</i>       | unclass. <i>Bacteroidetes</i>       | unclass. <i>Bacteroidetes</i>       | unclass. <i>Bacteroidetes</i> | <i>Bacteroidetes</i>     | <i>Bacteria</i> |
| Otu1115 | 1.17                                      | 0.4                            | 0.17              | 1.4                   | 0.28                | 23.63                | <i>Marinobacter</i>                 | <i>Alteromonadaceae</i>             | <i>Alteromonadales</i>              | <i>Gammaproteobacteria</i>    | <i>Proteobacteria</i>    | <i>Bacteria</i> |

| OTU     | Av.A <sub>i</sub><br>(pH <i>in situ</i> ) | Av.A <sub>i</sub><br>(pH 7.67) | Av.δ <sub>i</sub> | Av.δ <sub>i</sub> /SD | Av.δ <sub>i</sub> % | ΣAv.δ <sub>i</sub> % | Genus                               | Family                              | Order                               | Class                          | Phylum                   | Domain          |
|---------|-------------------------------------------|--------------------------------|-------------------|-----------------------|---------------------|----------------------|-------------------------------------|-------------------------------------|-------------------------------------|--------------------------------|--------------------------|-----------------|
| Otu0959 | 0.88                                      | 0.4                            | 0.17              | 1.84                  | 0.28                | 23.91                | unclass. <i>Rhodobacteraceae</i>    | <i>Rhodobacteraceae</i>             | <i>Rhodobacterales</i>              | <i>Alphaproteobacteria</i>     | <i>Proteobacteria</i>    | <i>Bacteria</i> |
| Otu0778 | 1.17                                      | 0.4                            | 0.17              | 1.43                  | 0.27                | 24.19                | unclass. <i>Gammaproteobacteria</i> | unclass. <i>Gammaproteobacteria</i> | unclass. <i>Gammaproteobacteria</i> | <i>Gammaproteobacteria</i>     | <i>Proteobacteria</i>    | <i>Bacteria</i> |
| Otu1099 | 0.77                                      | 1.29                           | 0.17              | 1.11                  | 0.27                | 24.46                | unclass. <i>Lentisphaeria</i>       | unclass. <i>Lentisphaeria</i>       | unclass. <i>Lentisphaeria</i>       | <i>Lentisphaeria</i>           | <i>Lentisphaerae</i>     | <i>Bacteria</i> |
| Otu1093 | 3.01                                      | 2.75                           | 0.17              | 1.37                  | 0.27                | 24.73                | unclass. <i>Proteobacteria</i>      | unclass. <i>Proteobacteria</i>      | unclass. <i>Proteobacteria</i>      | unclass. <i>Proteobacteria</i> | <i>Proteobacteria</i>    | <i>Bacteria</i> |
| Otu1430 | 0                                         | 0.88                           | 0.17              | 1.84                  | 0.27                | 24.99                | unclass. <i>Bacteria</i>            | unclass. <i>Bacteria</i>            | unclass. <i>Bacteria</i>            | unclass. <i>Bacteria</i>       | unclass. <i>Bacteria</i> | <i>Bacteria</i> |
| Otu1270 | 0                                         | 0.88                           | 0.17              | 1.84                  | 0.27                | 25.26                | unclass. <i>Flavobacteriaceae</i>   | <i>Flavobacteriaceae</i>            | <i>Flavobacteriales</i>             | <i>Flavobacteria</i>           | <i>Bacteroidetes</i>     | <i>Bacteria</i> |
| Otu0695 | 1.29                                      | 0.4                            | 0.17              | 1.47                  | 0.26                | 25.52                | unclass. <i>Proteobacteria</i>      | unclass. <i>Proteobacteria</i>      | unclass. <i>Proteobacteria</i>      | unclass. <i>Proteobacteria</i> | <i>Proteobacteria</i>    | <i>Bacteria</i> |
| Otu1147 | 0.4                                       | 1.11                           | 0.17              | 1.42                  | 0.26                | 25.78                | unclass. <i>Bacteria</i>            | unclass. <i>Bacteria</i>            | unclass. <i>Bacteria</i>            | unclass. <i>Bacteria</i>       | unclass. <i>Bacteria</i> | <i>Bacteria</i> |
| Otu0068 | 3.94                                      | 4.27                           | 0.16              | 1.3                   | 0.26                | 26.05                | <i>Pelagibacter</i>                 | SAR11-clade                         | <i>Rickettsiales</i>                | <i>Alphaproteobacteria</i>     | <i>Proteobacteria</i>    | <i>Bacteria</i> |
| Otu1173 | 0.2                                       | 0.89                           | 0.16              | 1.15                  | 0.26                | 26.3                 | <i>Opitutus</i>                     | <i>Opitutaceae</i>                  | <i>Opitutales</i>                   | <i>Opitutae</i>                | <i>Verrucomicrobia</i>   | <i>Bacteria</i> |
| Otu0844 | 0.85                                      | 1.08                           | 0.16              | 1.28                  | 0.26                | 26.56                | unclass. <i>Flavobacteriaceae</i>   | <i>Flavobacteriaceae</i>            | <i>Flavobacteriales</i>             | <i>Flavobacteria</i>           | <i>Bacteroidetes</i>     | <i>Bacteria</i> |
| Otu0971 | 0.2                                       | 0.97                           | 0.16              | 1.5                   | 0.26                | 26.81                | unclass. <i>Gammaproteobacteria</i> | unclass. <i>Gammaproteobacteria</i> | unclass. <i>Gammaproteobacteria</i> | <i>Gammaproteobacteria</i>     | <i>Proteobacteria</i>    | <i>Bacteria</i> |
| Otu0048 | 1.71                                      | 0.91                           | 0.16              | 1.08                  | 0.26                | 27.07                | unclass. <i>Flavobacteriaceae</i>   | <i>Flavobacteriaceae</i>            | <i>Flavobacteriales</i>             | <i>Flavobacteria</i>           | <i>Bacteroidetes</i>     | <i>Bacteria</i> |
| Otu0521 | 1.49                                      | 1.43                           | 0.16              | 1.3                   | 0.25                | 27.32                | unclass. <i>Rhodobacteraceae</i>    | <i>Rhodobacteraceae</i>             | <i>Rhodobacterales</i>              | <i>Alphaproteobacteria</i>     | <i>Proteobacteria</i>    | <i>Bacteria</i> |
| Otu0696 | 1.48                                      | 1.11                           | 0.16              | 1.3                   | 0.25                | 27.58                | unclass. <i>Flavobacteriaceae</i>   | <i>Flavobacteriaceae</i>            | <i>Flavobacteriales</i>             | <i>Flavobacteria</i>           | <i>Bacteroidetes</i>     | <i>Bacteria</i> |
| Otu1078 | 0.2                                       | 0.72                           | 0.16              | 0.6                   | 0.25                | 27.83                | unclass. <i>Campylobacteriales</i>  | unclass. <i>Campylobacteriales</i>  | <i>Campylobacteriales</i>           | <i>Epsilonproteobacteria</i>   | <i>Proteobacteria</i>    | <i>Bacteria</i> |
| Otu0281 | 1.52                                      | 2.15                           | 0.16              | 1.85                  | 0.25                | 28.08                | unclass. <i>Flavobacteriales</i>    | unclass. <i>Flavobacteriales</i>    | <i>Flavobacteriales</i>             | <i>Flavobacteria</i>           | <i>Bacteroidetes</i>     | <i>Bacteria</i> |
| Otu0473 | 1.92                                      | 1.11                           | 0.16              | 1.28                  | 0.25                | 28.33                | unclass. <i>Alphaproteobacteria</i> | unclass. <i>Alphaproteobacteria</i> | unclass. <i>Alphaproteobacteria</i> | <i>Alphaproteobacteria</i>     | <i>Proteobacteria</i>    | <i>Bacteria</i> |
| Otu1091 | 3.7                                       | 2.89                           | 0.16              | 1.57                  | 0.25                | 28.58                | unclass. <i>Flavobacteriaceae</i>   | <i>Flavobacteriaceae</i>            | <i>Flavobacteriales</i>             | <i>Flavobacteria</i>           | <i>Bacteroidetes</i>     | <i>Bacteria</i> |
| Otu0645 | 0.97                                      | 1.52                           | 0.16              | 1.23                  | 0.25                | 28.83                | <i>Arcobacter</i>                   | <i>Campylobacteraceae</i>           | <i>Campylobacteriales</i>           | <i>Epsilonproteobacteria</i>   | <i>Proteobacteria</i>    | <i>Bacteria</i> |
| Otu0692 | 2.7                                       | 2.39                           | 0.15              | 1.27                  | 0.25                | 29.08                | unclass. <i>Bacteria</i>            | unclass. <i>Bacteria</i>            | unclass. <i>Bacteria</i>            | unclass. <i>Bacteria</i>       | unclass. <i>Bacteria</i> | <i>Bacteria</i> |
| Otu0485 | 1.26                                      | 0.83                           | 0.15              | 1.18                  | 0.24                | 29.32                | unclass. <i>Alphaproteobacteria</i> | unclass. <i>Alphaproteobacteria</i> | unclass. <i>Alphaproteobacteria</i> | <i>Alphaproteobacteria</i>     | <i>Proteobacteria</i>    | <i>Bacteria</i> |
| Otu0503 | 0.68                                      | 1.15                           | 0.15              | 1.25                  | 0.24                | 29.57                | unclass. <i>Bacteroidetes</i>       | unclass. <i>Bacteroidetes</i>       | unclass. <i>Bacteroidetes</i>       | unclass. <i>Bacteroidetes</i>  | <i>Bacteroidetes</i>     | <i>Bacteria</i> |
| Otu1131 | 0.4                                       | 0.57                           | 0.15              | 0.81                  | 0.24                | 29.81                | unclass. <i>Bacteria</i>            | unclass. <i>Bacteria</i>            | unclass. <i>Bacteria</i>            | unclass. <i>Bacteria</i>       | unclass. <i>Bacteria</i> | <i>Bacteria</i> |
| Otu0826 | 2.8                                       | 2.19                           | 0.15              | 1.37                  | 0.24                | 30.05                | unclass. <i>Bacteroidetes</i>       | unclass. <i>Bacteroidetes</i>       | unclass. <i>Bacteroidetes</i>       | unclass. <i>Bacteroidetes</i>  | <i>Bacteroidetes</i>     | <i>Bacteria</i> |
| Otu0682 | 0.89                                      | 1.35                           | 0.15              | 1.35                  | 0.24                | 30.28                | unclass. <i>Oceanospirillaceae</i>  | <i>Oceanospirillaceae</i>           | <i>Oceanospirillales</i>            | <i>Gammaproteobacteria</i>     | <i>Proteobacteria</i>    | <i>Bacteria</i> |
| Otu1486 | 0                                         | 0.79                           | 0.15              | 0.79                  | 0.24                | 30.52                | unclass. <i>Flavobacteriaceae</i>   | <i>Flavobacteriaceae</i>            | <i>Flavobacteriales</i>             | <i>Flavobacteria</i>           | <i>Bacteroidetes</i>     | <i>Bacteria</i> |

| OTU     | Av.A <sub>i</sub><br>(pH <i>in situ</i> ) | Av.A <sub>i</sub><br>(pH 7.67) | Av.δ <sub>i</sub> | Av.δ <sub>i</sub> /SD | Av.δ <sub>i</sub> % | ΣAv.δ <sub>i</sub> % | Genus                               | Family                              | Order                               | Class                          | Phylum                   | Domain          |
|---------|-------------------------------------------|--------------------------------|-------------------|-----------------------|---------------------|----------------------|-------------------------------------|-------------------------------------|-------------------------------------|--------------------------------|--------------------------|-----------------|
| Otu1333 | 0.4                                       | 1.03                           | 0.15              | 1.3                   | 0.24                | 30.76                | unclass. <i>Legionellaceae</i>      | <i>Legionellaceae</i>               | <i>Legionellales</i>                | <i>Gammaproteobacteria</i>     | <i>Proteobacteria</i>    | <i>Bacteria</i> |
| Otu1193 | 0.48                                      | 1.05                           | 0.15              | 1.29                  | 0.24                | 31                   | unclass. <i>Saprospiraceae</i>      | <i>Saprospiraceae</i>               | <i>Sphingobacteriales</i>           | <i>Sphingobacteria</i>         | <i>Bacteroidetes</i>     | <i>Bacteria</i> |
| Otu0243 | 0.77                                      | 0.63                           | 0.15              | 1.17                  | 0.24                | 31.23                | unclass. <i>Gammaproteobacteria</i> | unclass. <i>Gammaproteobacteria</i> | unclass. <i>Gammaproteobacteria</i> | <i>Gammaproteobacteria</i>     | <i>Proteobacteria</i>    | <i>Bacteria</i> |
| Otu0075 | 0.63                                      | 0.77                           | 0.15              | 1.18                  | 0.23                | 31.46                | unclass. <i>Alphaproteobacteria</i> | unclass. <i>Alphaproteobacteria</i> | unclass. <i>Alphaproteobacteria</i> | <i>Alphaproteobacteria</i>     | <i>Proteobacteria</i>    | <i>Bacteria</i> |
| Otu0191 | 0.68                                      | 0.4                            | 0.15              | 1.09                  | 0.23                | 31.7                 | unclass. <i>Proteobacteria</i>      | unclass. <i>Proteobacteria</i>      | unclass. <i>Proteobacteria</i>      | unclass. <i>Proteobacteria</i> | <i>Proteobacteria</i>    | <i>Bacteria</i> |
| Otu1111 | 0.88                                      | 0.2                            | 0.15              | 1.45                  | 0.23                | 31.93                | unclass. <i>Proteobacteria</i>      | unclass. <i>Proteobacteria</i>      | unclass. <i>Proteobacteria</i>      | unclass. <i>Proteobacteria</i> | <i>Proteobacteria</i>    | <i>Bacteria</i> |
| Otu0596 | 1.79                                      | 1.17                           | 0.14              | 1.09                  | 0.23                | 32.16                | <i>Neptunomonas</i>                 | <i>Oceanospirillaceae</i>           | <i>Oceanospirillales</i>            | <i>Gammaproteobacteria</i>     | <i>Proteobacteria</i>    | <i>Bacteria</i> |
| Otu1186 | 0.68                                      | 0.63                           | 0.14              | 1.24                  | 0.23                | 32.39                | unclass. <i>Bacteria</i>            | unclass. <i>Bacteria</i>            | unclass. <i>Bacteria</i>            | unclass. <i>Bacteria</i>       | unclass. <i>Bacteria</i> | <i>Bacteria</i> |
| Otu1118 | 0.77                                      | 0                              | 0.14              | 1.18                  | 0.23                | 32.62                | unclass. <i>Oceanospirillales</i>   | unclass. <i>Oceanospirillales</i>   | <i>Oceanospirillales</i>            | <i>Gammaproteobacteria</i>     | <i>Proteobacteria</i>    | <i>Bacteria</i> |
| Otu1198 | 0.2                                       | 0.88                           | 0.14              | 1.46                  | 0.23                | 32.85                | unclass. <i>Gammaproteobacteria</i> | unclass. <i>Gammaproteobacteria</i> | unclass. <i>Gammaproteobacteria</i> | <i>Gammaproteobacteria</i>     | <i>Proteobacteria</i>    | <i>Bacteria</i> |
| Otu1107 | 0.68                                      | 1.35                           | 0.14              | 1.22                  | 0.23                | 33.07                | unclass. <i>Planctomycetaceae</i>   | <i>Planctomycetaceae</i>            | <i>Planctomycetales</i>             | <i>Planctomycetacia</i>        | <i>Planctomycetes</i>    | <i>Bacteria</i> |
| Otu1234 | 0.4                                       | 0.83                           | 0.14              | 1.18                  | 0.23                | 33.3                 | unclass. <i>Oceanospirillaceae</i>  | <i>Oceanospirillaceae</i>           | <i>Oceanospirillales</i>            | <i>Gammaproteobacteria</i>     | <i>Proteobacteria</i>    | <i>Bacteria</i> |
| Otu0186 | 0.85                                      | 1.17                           | 0.14              | 1.11                  | 0.23                | 33.52                | unclass. <i>Planctomycetaceae</i>   | <i>Planctomycetaceae</i>            | <i>Planctomycetales</i>             | <i>Planctomycetacia</i>        | <i>Planctomycetes</i>    | <i>Bacteria</i> |
| Otu0464 | 0.4                                       | 0.83                           | 0.14              | 1.19                  | 0.22                | 33.75                | unclass. <i>Bacteroidetes</i>       | unclass. <i>Bacteroidetes</i>       | unclass. <i>Bacteroidetes</i>       | unclass. <i>Bacteroidetes</i>  | <i>Bacteroidetes</i>     | <i>Bacteria</i> |
| Otu0703 | 0.63                                      | 0.6                            | 0.14              | 1.38                  | 0.22                | 33.97                | unclass. <i>Gammaproteobacteria</i> | unclass. <i>Gammaproteobacteria</i> | unclass. <i>Gammaproteobacteria</i> | <i>Gammaproteobacteria</i>     | <i>Proteobacteria</i>    | <i>Bacteria</i> |
| Otu0986 | 0.75                                      | 0.77                           | 0.14              | 1.22                  | 0.22                | 34.19                | unclass. <i>Planctomycetaceae</i>   | <i>Planctomycetaceae</i>            | <i>Planctomycetales</i>             | <i>Planctomycetacia</i>        | <i>Planctomycetes</i>    | <i>Bacteria</i> |
| Otu0809 | 0.49                                      | 0.4                            | 0.14              | 0.87                  | 0.22                | 34.41                | unclass. <i>Gammaproteobacteria</i> | unclass. <i>Gammaproteobacteria</i> | unclass. <i>Gammaproteobacteria</i> | <i>Gammaproteobacteria</i>     | <i>Proteobacteria</i>    | <i>Bacteria</i> |
| Otu0502 | 0.83                                      | 0.95                           | 0.14              | 1.27                  | 0.22                | 34.63                | unclass. <i>Gammaproteobacteria</i> | unclass. <i>Gammaproteobacteria</i> | unclass. <i>Gammaproteobacteria</i> | <i>Gammaproteobacteria</i>     | <i>Proteobacteria</i>    | <i>Bacteria</i> |
| Otu0846 | 0.83                                      | 0.68                           | 0.14              | 1.22                  | 0.22                | 34.84                | unclass. <i>Nannocystaceae</i>      | <i>Nannocystaceae</i>               | <i>Myxococcales</i>                 | <i>Deltaproteobacteria</i>     | <i>Proteobacteria</i>    | <i>Bacteria</i> |
| Otu0255 | 0.97                                      | 1.23                           | 0.14              | 1.22                  | 0.22                | 35.06                | <i>Sphingopyxis</i>                 | <i>Sphingomonadaceae</i>            | <i>Sphingomonadales</i>             | <i>Alphaproteobacteria</i>     | <i>Proteobacteria</i>    | <i>Bacteria</i> |
| Otu0707 | 0.55                                      | 0.8                            | 0.13              | 1.44                  | 0.21                | 35.27                | <i>Haliea</i>                       | <i>Alteromonadaceae</i>             | <i>Alteromonadales</i>              | <i>Gammaproteobacteria</i>     | <i>Proteobacteria</i>    | <i>Bacteria</i> |
| Otu0734 | 0.28                                      | 0.68                           | 0.13              | 1.17                  | 0.21                | 35.48                | unclass. <i>Bacteria</i>            | unclass. <i>Bacteria</i>            | unclass. <i>Bacteria</i>            | unclass. <i>Bacteria</i>       | unclass. <i>Bacteria</i> | <i>Bacteria</i> |
| Otu0202 | 0.88                                      | 0.48                           | 0.13              | 1.29                  | 0.21                | 35.69                | unclass. <i>Alteromonadaceae</i>    | <i>Alteromonadaceae</i>             | <i>Alteromonadales</i>              | <i>Gammaproteobacteria</i>     | <i>Proteobacteria</i>    | <i>Bacteria</i> |
| Otu0284 | 0.68                                      | 0                              | 0.13              | 1.17                  | 0.21                | 35.9                 | unclass. <i>Saprospiraceae</i>      | <i>Saprospiraceae</i>               | <i>Sphingobacteriales</i>           | <i>Sphingobacteria</i>         | <i>Bacteroidetes</i>     | <i>Bacteria</i> |
| Otu0761 | 0.48                                      | 0.88                           | 0.13              | 1.32                  | 0.21                | 36.11                | unclass. <i>Verrucomicrobiaceae</i> | <i>Verrucomicrobiaceae</i>          | <i>Verrucomicrobiales</i>           | <i>Verrucomicrobiae</i>        | <i>Verrucomicrobia</i>   | <i>Bacteria</i> |
| Otu1256 | 0                                         | 0.68                           | 0.13              | 1.15                  | 0.2                 | 36.31                | unclass. <i>Sphingobacteriales</i>  | unclass. <i>Sphingobacteriales</i>  | <i>Sphingobacteriales</i>           | <i>Sphingobacteria</i>         | <i>Bacteroidetes</i>     | <i>Bacteria</i> |
| Otu0824 | 0                                         | 0.68                           | 0.13              | 1.15                  | 0.2                 | 36.51                | unclass. <i>Bacteria</i>            | unclass. <i>Bacteria</i>            | unclass. <i>Bacteria</i>            | unclass. <i>Bacteria</i>       | unclass. <i>Bacteria</i> | <i>Bacteria</i> |

| OTU     | Av.A <sub>i</sub><br>(pH <i>in situ</i> ) | Av.A <sub>i</sub><br>(pH 7.67) | Av.δ <sub>i</sub> | Av.δ <sub>i</sub> /SD | Av.δ <sub>i</sub> % | ΣAv.δ <sub>i</sub> % | Genus                               | Family                              | Order                               | Class                          | Phylum                   | Domain          |
|---------|-------------------------------------------|--------------------------------|-------------------|-----------------------|---------------------|----------------------|-------------------------------------|-------------------------------------|-------------------------------------|--------------------------------|--------------------------|-----------------|
| Otu1432 | 0                                         | 0.68                           | 0.13              | 1.16                  | 0.2                 | 36.72                | unclass. <i>Oceanospirillales</i>   | unclass. <i>Oceanospirillales</i>   | <i>Oceanospirillales</i>            | <i>Gammaproteobacteria</i>     | <i>Proteobacteria</i>    | <i>Bacteria</i> |
| Otu1130 | 0.4                                       | 0.6                            | 0.13              | 0.98                  | 0.2                 | 36.92                | unclass. <i>Bacteria</i>            | unclass. <i>Bacteria</i>            | unclass. <i>Bacteria</i>            | unclass. <i>Bacteria</i>       | unclass. <i>Bacteria</i> | <i>Bacteria</i> |
| Otu0742 | 0.77                                      | 0.4                            | 0.13              | 1.2                   | 0.2                 | 37.13                | unclass. <i>Rhodobacteraceae</i>    | <i>Rhodobacteraceae</i>             | <i>Rhodobacterales</i>              | <i>Alphaproteobacteria</i>     | <i>Proteobacteria</i>    | <i>Bacteria</i> |
| Otu0394 | 0.2                                       | 0.8                            | 0.13              | 1.42                  | 0.2                 | 37.33                | unclass. <i>Bacteria</i>            | unclass. <i>Bacteria</i>            | unclass. <i>Bacteria</i>            | unclass. <i>Bacteria</i>       | unclass. <i>Bacteria</i> | <i>Bacteria</i> |
| Otu0483 | 0.68                                      | 0                              | 0.13              | 1.14                  | 0.2                 | 37.53                | unclass. <i>Flavobacteriaceae</i>   | <i>Flavobacteriaceae</i>            | <i>Flavobacteriales</i>             | <i>Flavobacteria</i>           | <i>Bacteroidetes</i>     | <i>Bacteria</i> |
| Otu1101 | 0.68                                      | 0.75                           | 0.13              | 1.17                  | 0.2                 | 37.73                | <i>Porphyrobacter</i>               | <i>Erythrobacteraceae</i>           | <i>Sphingomonadales</i>             | <i>Alphaproteobacteria</i>     | <i>Proteobacteria</i>    | <i>Bacteria</i> |
| Otu1338 | 0.2                                       | 0.63                           | 0.13              | 0.93                  | 0.2                 | 37.94                | unclass. <i>Bacteroidetes</i>       | unclass. <i>Bacteroidetes</i>       | unclass. <i>Bacteroidetes</i>       | unclass. <i>Bacteroidetes</i>  | <i>Bacteroidetes</i>     | <i>Bacteria</i> |
| Otu1281 | 0.63                                      | 0                              | 0.13              | 0.49                  | 0.2                 | 38.14                | unclass. <i>Proteobacteria</i>      | unclass. <i>Proteobacteria</i>      | unclass. <i>Proteobacteria</i>      | unclass. <i>Proteobacteria</i> | <i>Proteobacteria</i>    | <i>Bacteria</i> |
| Otu0375 | 0.75                                      | 0.4                            | 0.13              | 1.09                  | 0.2                 | 38.34                | unclass. <i>Bacteroidetes</i>       | unclass. <i>Bacteroidetes</i>       | unclass. <i>Bacteroidetes</i>       | unclass. <i>Bacteroidetes</i>  | <i>Bacteroidetes</i>     | <i>Bacteria</i> |
| Otu0373 | 0.2                                       | 0.63                           | 0.13              | 0.92                  | 0.2                 | 38.54                | unclass. <i>Bacteria</i>            | unclass. <i>Bacteria</i>            | unclass. <i>Bacteria</i>            | unclass. <i>Bacteria</i>       | unclass. <i>Bacteria</i> | <i>Bacteria</i> |
| Otu0052 | 2.7                                       | 2.32                           | 0.13              | 1.36                  | 0.2                 | 38.74                | unclass. <i>Betaproteobacteria</i>  | unclass. <i>Betaproteobacteria</i>  | unclass. <i>Betaproteobacteria</i>  | <i>Betaproteobacteria</i>      | <i>Proteobacteria</i>    | <i>Bacteria</i> |
| Otu0998 | 0.4                                       | 0.75                           | 0.13              | 1.09                  | 0.2                 | 38.94                | unclass. <i>Gammaproteobacteria</i> | unclass. <i>Gammaproteobacteria</i> | unclass. <i>Gammaproteobacteria</i> | <i>Gammaproteobacteria</i>     | <i>Proteobacteria</i>    | <i>Bacteria</i> |
| Otu1110 | 0.68                                      | 0.48                           | 0.12              | 1.14                  | 0.2                 | 39.14                | unclass. <i>Alphaproteobacteria</i> | unclass. <i>Alphaproteobacteria</i> | unclass. <i>Alphaproteobacteria</i> | <i>Alphaproteobacteria</i>     | <i>Proteobacteria</i>    | <i>Bacteria</i> |
| Otu0469 | 2.44                                      | 2.49                           | 0.12              | 1.37                  | 0.2                 | 39.34                | unclass. <i>Bacteria</i>            | unclass. <i>Bacteria</i>            | unclass. <i>Bacteria</i>            | unclass. <i>Bacteria</i>       | unclass. <i>Bacteria</i> | <i>Bacteria</i> |
| Otu0219 | 0.4                                       | 0.57                           | 0.12              | 1.11                  | 0.19                | 39.53                | unclass. <i>Erythrobacteraceae</i>  | <i>Erythrobacteraceae</i>           | <i>Sphingomonadales</i>             | <i>Alphaproteobacteria</i>     | <i>Proteobacteria</i>    | <i>Bacteria</i> |
| Otu1417 | 0                                         | 0.65                           | 0.12              | 0.71                  | 0.19                | 39.73                | unclass. <i>Gammaproteobacteria</i> | unclass. <i>Gammaproteobacteria</i> | unclass. <i>Gammaproteobacteria</i> | <i>Gammaproteobacteria</i>     | <i>Proteobacteria</i>    | <i>Bacteria</i> |
| Otu0142 | 0.28                                      | 0.6                            | 0.12              | 1.27                  | 0.19                | 39.92                | unclass. <i>Gammaproteobacteria</i> | unclass. <i>Gammaproteobacteria</i> | unclass. <i>Gammaproteobacteria</i> | <i>Gammaproteobacteria</i>     | <i>Proteobacteria</i>    | <i>Bacteria</i> |
| Otu1135 | 0.2                                       | 0.68                           | 0.12              | 1.12                  | 0.19                | 40.11                | unclass. <i>Sphingobacteriales</i>  | unclass. <i>Sphingobacteriales</i>  | <i>Sphingobacteriales</i>           | <i>Sphingobacteria</i>         | <i>Bacteroidetes</i>     | <i>Bacteria</i> |
| Otu0395 | 0.2                                       | 0.68                           | 0.12              | 1.12                  | 0.19                | 40.31                | unclass. <i>Sphingobacteriales</i>  | unclass. <i>Sphingobacteriales</i>  | <i>Sphingobacteriales</i>           | <i>Sphingobacteria</i>         | <i>Bacteroidetes</i>     | <i>Bacteria</i> |
| Otu1109 | 0.77                                      | 0.6                            | 0.12              | 1.24                  | 0.19                | 40.5                 | unclass. <i>Saprospiraceae</i>      | <i>Saprospiraceae</i>               | <i>Sphingobacteriales</i>           | <i>Sphingobacteria</i>         | <i>Bacteroidetes</i>     | <i>Bacteria</i> |
| Otu1195 | 0.2                                       | 0.68                           | 0.12              | 1.12                  | 0.19                | 40.69                | unclass. <i>Bacteria</i>            | unclass. <i>Bacteria</i>            | unclass. <i>Bacteria</i>            | unclass. <i>Bacteria</i>       | unclass. <i>Bacteria</i> | <i>Bacteria</i> |
| Otu1076 | 0.28                                      | 0.55                           | 0.12              | 0.9                   | 0.19                | 40.88                | <i>Acinetobacter</i>                | <i>Moraxellaceae</i>                | <i>Pseudomonadales</i>              | <i>Gammaproteobacteria</i>     | <i>Proteobacteria</i>    | <i>Bacteria</i> |
| Otu0465 | 0                                         | 0.63                           | 0.12              | 0.79                  | 0.19                | 41.07                | unclass. <i>Bacteroidetes</i>       | unclass. <i>Bacteroidetes</i>       | unclass. <i>Bacteroidetes</i>       | unclass. <i>Bacteroidetes</i>  | <i>Bacteroidetes</i>     | <i>Bacteria</i> |
| Otu1119 | 0.68                                      | 0.2                            | 0.12              | 1.13                  | 0.19                | 41.26                | unclass. <i>Bacteroidetes</i>       | unclass. <i>Bacteroidetes</i>       | unclass. <i>Bacteroidetes</i>       | unclass. <i>Bacteroidetes</i>  | <i>Bacteroidetes</i>     | <i>Bacteria</i> |
| Otu1030 | 0.35                                      | 0.48                           | 0.12              | 0.92                  | 0.19                | 41.45                | unclass. <i>Proteobacteria</i>      | unclass. <i>Proteobacteria</i>      | unclass. <i>Proteobacteria</i>      | unclass. <i>Proteobacteria</i> | <i>Proteobacteria</i>    | <i>Bacteria</i> |
| Otu0541 | 1.6                                       | 1.03                           | 0.12              | 1.12                  | 0.19                | 41.64                | unclass. <i>Rhodobacteraceae</i>    | <i>Rhodobacteraceae</i>             | <i>Rhodobacterales</i>              | <i>Alphaproteobacteria</i>     | <i>Proteobacteria</i>    | <i>Bacteria</i> |
| Otu0812 | 0.48                                      | 0.48                           | 0.12              | 1.01                  | 0.18                | 41.82                | unclass. <i>Gammaproteobacteria</i> | unclass. <i>Gammaproteobacteria</i> | unclass. <i>Gammaproteobacteria</i> | <i>Gammaproteobacteria</i>     | <i>Proteobacteria</i>    | <i>Bacteria</i> |

| OTU     | Av.A <sub>i</sub><br>(pH <i>in situ</i> ) | Av.A <sub>i</sub><br>(pH 7.67) | Av.δ <sub>i</sub> | Av.δ <sub>i</sub> /SD | Av.δ <sub>i</sub> % | ΣAv.δ <sub>i</sub> % | Genus                               | Family                              | Order                               | Class                          | Phylum                   | Domain          |
|---------|-------------------------------------------|--------------------------------|-------------------|-----------------------|---------------------|----------------------|-------------------------------------|-------------------------------------|-------------------------------------|--------------------------------|--------------------------|-----------------|
| Otu0882 | 0                                         | 0.6                            | 0.11              | 1.2                   | 0.18                | 42                   | unclass. <i>Bacteria</i>            | unclass. <i>Bacteria</i>            | unclass. <i>Bacteria</i>            | unclass. <i>Bacteria</i>       | unclass. <i>Bacteria</i> | <i>Bacteria</i> |
| Otu1095 | 0.6                                       | 0                              | 0.11              | 0.74                  | 0.18                | 42.18                | unclass. <i>Bacteria</i>            | unclass. <i>Bacteria</i>            | unclass. <i>Bacteria</i>            | unclass. <i>Bacteria</i>       | unclass. <i>Bacteria</i> | <i>Bacteria</i> |
| Otu0677 | 0.6                                       | 0                              | 0.11              | 0.73                  | 0.18                | 42.36                | <i>Thalassobius</i>                 | <i>Rhodobacteraceae</i>             | <i>Rhodobacterales</i>              | <i>Alphaproteobacteria</i>     | <i>Proteobacteria</i>    | <i>Bacteria</i> |
| Otu1133 | 0.6                                       | 0                              | 0.11              | 1.2                   | 0.18                | 42.53                | unclass. <i>Bacteria</i>            | unclass. <i>Bacteria</i>            | unclass. <i>Bacteria</i>            | unclass. <i>Bacteria</i>       | unclass. <i>Bacteria</i> | <i>Bacteria</i> |
| Otu1023 | 2.35                                      | 2.9                            | 0.11              | 1.34                  | 0.18                | 42.71                | unclass. <i>Lentisphaeria</i>       | unclass. <i>Lentisphaeria</i>       | unclass. <i>Lentisphaeria</i>       | <i>Lentisphaeria</i>           | <i>Lentisphaerae</i>     | <i>Bacteria</i> |
| Otu0731 | 0.45                                      | 0.2                            | 0.11              | 0.65                  | 0.18                | 42.89                | <i>Lentisphaera</i>                 | <i>Lentisphaeraceae</i>             | <i>Lentisphaerales</i>              | <i>Lentisphaeria</i>           | <i>Lentisphaerae</i>     | <i>Bacteria</i> |
| Otu0509 | 1.39                                      | 1.08                           | 0.11              | 1.19                  | 0.18                | 43.06                | unclass. <i>Gammaproteobacteria</i> | unclass. <i>Gammaproteobacteria</i> | unclass. <i>Gammaproteobacteria</i> | <i>Gammaproteobacteria</i>     | <i>Proteobacteria</i>    | <i>Bacteria</i> |
| Otu0694 | 1.41                                      | 1.19                           | 0.11              | 1.06                  | 0.17                | 43.24                | unclass. <i>Alphaproteobacteria</i> | unclass. <i>Alphaproteobacteria</i> | unclass. <i>Alphaproteobacteria</i> | <i>Alphaproteobacteria</i>     | <i>Proteobacteria</i>    | <i>Bacteria</i> |
| Otu1113 | 1.11                                      | 1.13                           | 0.11              | 0.9                   | 0.17                | 43.41                | unclass. <i>Gammaproteobacteria</i> | unclass. <i>Gammaproteobacteria</i> | unclass. <i>Gammaproteobacteria</i> | <i>Gammaproteobacteria</i>     | <i>Proteobacteria</i>    | <i>Bacteria</i> |
| Otu1211 | 0.28                                      | 0.48                           | 0.11              | 0.89                  | 0.17                | 43.58                | unclass. <i>Oceanospirillaceae</i>  | <i>Oceanospirillaceae</i>           | <i>Oceanospirillales</i>            | <i>Gammaproteobacteria</i>     | <i>Proteobacteria</i>    | <i>Bacteria</i> |
| Otu0044 | 0.6                                       | 0.2                            | 0.11              | 1.1                   | 0.17                | 43.75                | unclass. <i>Gammaproteobacteria</i> | unclass. <i>Gammaproteobacteria</i> | unclass. <i>Gammaproteobacteria</i> | <i>Gammaproteobacteria</i>     | <i>Proteobacteria</i>    | <i>Bacteria</i> |
| Otu1552 | 0                                         | 0.57                           | 0.11              | 0.8                   | 0.17                | 43.92                | unclass. <i>Gammaproteobacteria</i> | unclass. <i>Gammaproteobacteria</i> | unclass. <i>Gammaproteobacteria</i> | <i>Gammaproteobacteria</i>     | <i>Proteobacteria</i>    | <i>Bacteria</i> |
| Otu0973 | 0.4                                       | 0.8                            | 0.11              | 1.1                   | 0.17                | 44.09                | unclass. <i>Flavobacteriaceae</i>   | <i>Flavobacteriaceae</i>            | <i>Flavobacteriales</i>             | <i>Flavobacteria</i>           | <i>Bacteroidetes</i>     | <i>Bacteria</i> |
| Otu0504 | 0.6                                       | 0.2                            | 0.11              | 1.1                   | 0.17                | 44.26                | unclass. <i>Alphaproteobacteria</i> | unclass. <i>Alphaproteobacteria</i> | unclass. <i>Alphaproteobacteria</i> | <i>Alphaproteobacteria</i>     | <i>Proteobacteria</i>    | <i>Bacteria</i> |
| Otu0767 | 0.2                                       | 0.6                            | 0.11              | 1.1                   | 0.17                | 44.43                | unclass. <i>Bacteria</i>            | unclass. <i>Bacteria</i>            | unclass. <i>Bacteria</i>            | unclass. <i>Bacteria</i>       | unclass. <i>Bacteria</i> | <i>Bacteria</i> |
| Otu0934 | 0.4                                       | 0.48                           | 0.11              | 1                     | 0.17                | 44.6                 | unclass. <i>Bacteria</i>            | unclass. <i>Bacteria</i>            | unclass. <i>Bacteria</i>            | unclass. <i>Bacteria</i>       | unclass. <i>Bacteria</i> | <i>Bacteria</i> |
| Otu0062 | 0.55                                      | 0                              | 0.11              | 0.74                  | 0.17                | 44.77                | <i>Haliea</i>                       | <i>Alteromonadaceae</i>             | <i>Alteromonadales</i>              | <i>Gammaproteobacteria</i>     | <i>Proteobacteria</i>    | <i>Bacteria</i> |
| Otu0817 | 0.8                                       | 0.4                            | 0.11              | 1.1                   | 0.17                | 44.93                | unclass. <i>Bacteroidetes</i>       | unclass. <i>Bacteroidetes</i>       | unclass. <i>Bacteroidetes</i>       | unclass. <i>Bacteroidetes</i>  | <i>Bacteroidetes</i>     | <i>Bacteria</i> |
| Otu0170 | 0.8                                       | 0.4                            | 0.11              | 1.1                   | 0.17                | 45.1                 | unclass. <i>Bacteria</i>            | unclass. <i>Bacteria</i>            | unclass. <i>Bacteria</i>            | unclass. <i>Bacteria</i>       | unclass. <i>Bacteria</i> | <i>Bacteria</i> |
| Otu1485 | 0                                         | 0.57                           | 0.1               | 0.49                  | 0.17                | 45.27                | unclass. <i>Gammaproteobacteria</i> | unclass. <i>Gammaproteobacteria</i> | unclass. <i>Gammaproteobacteria</i> | <i>Gammaproteobacteria</i>     | <i>Proteobacteria</i>    | <i>Bacteria</i> |
| Otu0974 | 0.57                                      | 0                              | 0.1               | 0.8                   | 0.17                | 45.44                | unclass. <i>Flavobacteriaceae</i>   | <i>Flavobacteriaceae</i>            | <i>Flavobacteriales</i>             | <i>Flavobacteria</i>           | <i>Bacteroidetes</i>     | <i>Bacteria</i> |
| Otu1421 | 0                                         | 0.55                           | 0.1               | 0.76                  | 0.17                | 45.6                 | unclass. <i>Gammaproteobacteria</i> | unclass. <i>Gammaproteobacteria</i> | unclass. <i>Gammaproteobacteria</i> | <i>Gammaproteobacteria</i>     | <i>Proteobacteria</i>    | <i>Bacteria</i> |
| Otu1207 | 0                                         | 0.55                           | 0.1               | 0.76                  | 0.16                | 45.77                | unclass. <i>Bacteroidetes</i>       | unclass. <i>Bacteroidetes</i>       | unclass. <i>Bacteroidetes</i>       | unclass. <i>Bacteroidetes</i>  | <i>Bacteroidetes</i>     | <i>Bacteria</i> |
| Otu1550 | 0                                         | 0.55                           | 0.1               | 0.76                  | 0.16                | 45.93                | unclass. <i>Gammaproteobacteria</i> | unclass. <i>Gammaproteobacteria</i> | unclass. <i>Gammaproteobacteria</i> | <i>Gammaproteobacteria</i>     | <i>Proteobacteria</i>    | <i>Bacteria</i> |
| Otu0379 | 0.55                                      | 0                              | 0.1               | 0.77                  | 0.16                | 46.09                | unclass. <i>Proteobacteria</i>      | unclass. <i>Proteobacteria</i>      | unclass. <i>Proteobacteria</i>      | unclass. <i>Proteobacteria</i> | <i>Proteobacteria</i>    | <i>Bacteria</i> |
| Otu0428 | 0                                         | 0.55                           | 0.1               | 0.75                  | 0.16                | 46.26                | unclass. <i>Gammaproteobacteria</i> | unclass. <i>Gammaproteobacteria</i> | unclass. <i>Gammaproteobacteria</i> | <i>Gammaproteobacteria</i>     | <i>Proteobacteria</i>    | <i>Bacteria</i> |
| Otu1197 | 0.4                                       | 0.2                            | 0.1               | 0.67                  | 0.16                | 46.42                | unclass. <i>Gammaproteobacteria</i> | unclass. <i>Gammaproteobacteria</i> | unclass. <i>Gammaproteobacteria</i> | <i>Gammaproteobacteria</i>     | <i>Proteobacteria</i>    | <i>Bacteria</i> |

| OTU     | Av.A <sub>i</sub><br>(pH <i>in situ</i> ) | Av.A <sub>i</sub><br>(pH 7.67) | Av.δ <sub>i</sub> | Av.δ <sub>i</sub> /SD | Av.δ <sub>i</sub> % | ΣAv.δ <sub>i</sub> % | Genus                               | Family                              | Order                               | Class                          | Phylum                   | Domain          |
|---------|-------------------------------------------|--------------------------------|-------------------|-----------------------|---------------------|----------------------|-------------------------------------|-------------------------------------|-------------------------------------|--------------------------------|--------------------------|-----------------|
| Otu1096 | 1.18                                      | 1.52                           | 0.1               | 0.97                  | 0.16                | 46.58                | unclass. <i>Lentisphaeria</i>       | unclass. <i>Lentisphaeria</i>       | unclass. <i>Lentisphaeria</i>       | <i>Lentisphaeria</i>           | <i>Lentisphaerae</i>     | <i>Bacteria</i> |
| Otu1296 | 0.4                                       | 0.28                           | 0.1               | 0.94                  | 0.16                | 46.74                | unclass. <i>Proteobacteria</i>      | unclass. <i>Proteobacteria</i>      | unclass. <i>Proteobacteria</i>      | unclass. <i>Proteobacteria</i> | <i>Proteobacteria</i>    | <i>Bacteria</i> |
| Otu0737 | 1.08                                      | 1.58                           | 0.1               | 1.52                  | 0.16                | 46.9                 | unclass. <i>Gammaproteobacteria</i> | unclass. <i>Gammaproteobacteria</i> | unclass. <i>Gammaproteobacteria</i> | <i>Gammaproteobacteria</i>     | <i>Proteobacteria</i>    | <i>Bacteria</i> |
| Otu1222 | 0.2                                       | 0.48                           | 0.1               | 0.88                  | 0.16                | 47.06                | unclass. <i>Flavobacteriaceae</i>   | <i>Flavobacteriaceae</i>            | <i>Flavobacteriales</i>             | <i>Flavobacteria</i>           | <i>Bacteroidetes</i>     | <i>Bacteria</i> |
| Otu0035 | 0.28                                      | 0.4                            | 0.1               | 0.94                  | 0.16                | 47.21                | <i>Colwellia</i>                    | <i>Colwelliaceae</i>                | <i>Alteromonadales</i>              | <i>Gammaproteobacteria</i>     | <i>Proteobacteria</i>    | <i>Bacteria</i> |
| Otu0622 | 0.2                                       | 0.48                           | 0.1               | 0.88                  | 0.16                | 47.37                | <i>Colwellia</i>                    | <i>Colwelliaceae</i>                | <i>Alteromonadales</i>              | <i>Gammaproteobacteria</i>     | <i>Proteobacteria</i>    | <i>Bacteria</i> |
| Otu1156 | 0.2                                       | 0.4                            | 0.1               | 0.67                  | 0.16                | 47.53                | unclass. <i>Gammaproteobacteria</i> | unclass. <i>Gammaproteobacteria</i> | unclass. <i>Gammaproteobacteria</i> | <i>Gammaproteobacteria</i>     | <i>Proteobacteria</i>    | <i>Bacteria</i> |
| Otu1232 | 0.2                                       | 0.48                           | 0.1               | 0.89                  | 0.16                | 47.68                | <i>Haliea</i>                       | <i>Alteromonadaceae</i>             | <i>Alteromonadales</i>              | <i>Gammaproteobacteria</i>     | <i>Proteobacteria</i>    | <i>Bacteria</i> |
| Otu0046 | 0.48                                      | 0.2                            | 0.1               | 0.89                  | 0.16                | 47.84                | unclass. <i>Flavobacteriaceae</i>   | <i>Flavobacteriaceae</i>            | <i>Flavobacteriales</i>             | <i>Flavobacteria</i>           | <i>Bacteroidetes</i>     | <i>Bacteria</i> |
| Otu1188 | 0.2                                       | 0.48                           | 0.1               | 0.89                  | 0.16                | 47.99                | unclass. <i>Flammeovirgaceae</i>    | <i>Flammeovirgaceae</i>             | <i>Sphingobacteriales</i>           | <i>Sphingobacteria</i>         | <i>Bacteroidetes</i>     | <i>Bacteria</i> |
| Otu0030 | 0.28                                      | 0.4                            | 0.1               | 0.94                  | 0.16                | 48.15                | unclass. <i>Gammaproteobacteria</i> | unclass. <i>Gammaproteobacteria</i> | unclass. <i>Gammaproteobacteria</i> | <i>Gammaproteobacteria</i>     | <i>Proteobacteria</i>    | <i>Bacteria</i> |
| Otu0213 | 0.48                                      | 0.2                            | 0.1               | 0.89                  | 0.16                | 48.3                 | unclass. <i>Gammaproteobacteria</i> | unclass. <i>Gammaproteobacteria</i> | unclass. <i>Gammaproteobacteria</i> | <i>Gammaproteobacteria</i>     | <i>Proteobacteria</i>    | <i>Bacteria</i> |
| Otu0744 | 0.48                                      | 0.2                            | 0.1               | 0.89                  | 0.16                | 48.46                | unclass. <i>Gammaproteobacteria</i> | unclass. <i>Gammaproteobacteria</i> | unclass. <i>Gammaproteobacteria</i> | <i>Gammaproteobacteria</i>     | <i>Proteobacteria</i>    | <i>Bacteria</i> |
| Otu0333 | 0.6                                       | 0.4                            | 0.1               | 1.02                  | 0.16                | 48.61                | unclass. <i>Gammaproteobacteria</i> | unclass. <i>Gammaproteobacteria</i> | unclass. <i>Gammaproteobacteria</i> | <i>Gammaproteobacteria</i>     | <i>Proteobacteria</i>    | <i>Bacteria</i> |
| Otu0510 | 0.48                                      | 0.2                            | 0.1               | 0.89                  | 0.15                | 48.77                | unclass. <i>Gammaproteobacteria</i> | unclass. <i>Gammaproteobacteria</i> | unclass. <i>Gammaproteobacteria</i> | <i>Gammaproteobacteria</i>     | <i>Proteobacteria</i>    | <i>Bacteria</i> |
| Otu0421 | 0.48                                      | 0.2                            | 0.1               | 0.88                  | 0.15                | 48.92                | unclass. <i>Gammaproteobacteria</i> | unclass. <i>Gammaproteobacteria</i> | unclass. <i>Gammaproteobacteria</i> | <i>Gammaproteobacteria</i>     | <i>Proteobacteria</i>    | <i>Bacteria</i> |
| Otu1094 | 2.68                                      | 3.09                           | 0.1               | 1.22                  | 0.15                | 49.08                | unclass. <i>Bacteroidetes</i>       | unclass. <i>Bacteroidetes</i>       | unclass. <i>Bacteroidetes</i>       | unclass. <i>Bacteroidetes</i>  | <i>Bacteroidetes</i>     | <i>Bacteria</i> |
| Otu0143 | 0.48                                      | 0                              | 0.1               | 0.78                  | 0.15                | 49.23                | unclass. <i>Gammaproteobacteria</i> | unclass. <i>Gammaproteobacteria</i> | unclass. <i>Gammaproteobacteria</i> | <i>Gammaproteobacteria</i>     | <i>Proteobacteria</i>    | <i>Bacteria</i> |
| Otu0192 | 0.48                                      | 0                              | 0.1               | 0.78                  | 0.15                | 49.38                | unclass. <i>Gammaproteobacteria</i> | unclass. <i>Gammaproteobacteria</i> | unclass. <i>Gammaproteobacteria</i> | <i>Gammaproteobacteria</i>     | <i>Proteobacteria</i>    | <i>Bacteria</i> |
| Otu1114 | 0.48                                      | 0                              | 0.09              | 0.78                  | 0.15                | 49.53                | unclass. <i>Microbacteriaceae</i>   | <i>Microbacteriaceae</i>            | <i>Actinomycetales</i>              | <i>Actinobacteria</i>          | <i>Actinobacteria</i>    | <i>Bacteria</i> |
| Otu0084 | 1.23                                      | 1.52                           | 0.09              | 1.04                  | 0.15                | 49.68                | unclass. <i>Gammaproteobacteria</i> | unclass. <i>Gammaproteobacteria</i> | unclass. <i>Gammaproteobacteria</i> | <i>Gammaproteobacteria</i>     | <i>Proteobacteria</i>    | <i>Bacteria</i> |
| Otu0520 | 0                                         | 0.48                           | 0.09              | 0.78                  | 0.15                | 49.83                | unclass. <i>Alphaproteobacteria</i> | unclass. <i>Alphaproteobacteria</i> | unclass. <i>Alphaproteobacteria</i> | <i>Alphaproteobacteria</i>     | <i>Proteobacteria</i>    | <i>Bacteria</i> |
| Otu1433 | 0                                         | 0.48                           | 0.09              | 0.78                  | 0.15                | 49.97                | unclass. <i>Bacteria</i>            | unclass. <i>Bacteria</i>            | unclass. <i>Bacteria</i>            | unclass. <i>Bacteria</i>       | unclass. <i>Bacteria</i> | <i>Bacteria</i> |
| Otu1470 | 0                                         | 0.48                           | 0.09              | 0.78                  | 0.15                | 50.12                | unclass. <i>Gammaproteobacteria</i> | unclass. <i>Gammaproteobacteria</i> | unclass. <i>Gammaproteobacteria</i> | <i>Gammaproteobacteria</i>     | <i>Proteobacteria</i>    | <i>Bacteria</i> |
| Otu1496 | 0                                         | 0.48                           | 0.09              | 0.78                  | 0.14                | 50.26                | unclass. <i>Bacteria</i>            | unclass. <i>Bacteria</i>            | unclass. <i>Bacteria</i>            | unclass. <i>Bacteria</i>       | unclass. <i>Bacteria</i> | <i>Bacteria</i> |
| Otu1378 | 0                                         | 0.48                           | 0.09              | 0.78                  | 0.14                | 50.41                | unclass. <i>Gammaproteobacteria</i> | unclass. <i>Gammaproteobacteria</i> | unclass. <i>Gammaproteobacteria</i> | <i>Gammaproteobacteria</i>     | <i>Proteobacteria</i>    | <i>Bacteria</i> |
| Otu1441 | 0                                         | 0.48                           | 0.09              | 0.78                  | 0.14                | 50.55                | unclass. <i>Deltaproteobacteria</i> | unclass. <i>Deltaproteobacteria</i> | unclass. <i>Deltaproteobacteria</i> | <i>Deltaproteobacteria</i>     | <i>Proteobacteria</i>    | <i>Bacteria</i> |



| OTU     | Av.A <sub>i</sub><br>(pH <i>in situ</i> ) | Av.A <sub>i</sub><br>(pH 7.67) | Av.δ <sub>i</sub> | Av.δ <sub>i</sub> /SD | Av.δ <sub>i</sub> % | ΣAv.δ <sub>i</sub> % | Genus                               | Family                              | Order                               | Class                         | Phylum                   | Domain          |
|---------|-------------------------------------------|--------------------------------|-------------------|-----------------------|---------------------|----------------------|-------------------------------------|-------------------------------------|-------------------------------------|-------------------------------|--------------------------|-----------------|
| Otu1578 | 0                                         | 0.48                           | 0.09              | 0.78                  | 0.14                | 50.7                 | unclass. <i>Planctomycetaceae</i>   | <i>Planctomycetaceae</i>            | <i>Planctomycetales</i>             | <i>Planctomycetacia</i>       | <i>Planctomycetes</i>    | <i>Bacteria</i> |
| Otu0057 | 0                                         | 0.48                           | 0.09              | 0.78                  | 0.14                | 50.84                | <i>Ulvibacter</i>                   | <i>Flavobacteriaceae</i>            | <i>Flavobacteriales</i>             | <i>Flavobacteria</i>          | <i>Bacteroidetes</i>     | <i>Bacteria</i> |
| Otu0426 | 0.4                                       | 0.4                            | 0.09              | 0.94                  | 0.14                | 50.99                | unclass. <i>Gammaproteobacteria</i> | unclass. <i>Gammaproteobacteria</i> | unclass. <i>Gammaproteobacteria</i> | <i>Gammaproteobacteria</i>    | <i>Proteobacteria</i>    | <i>Bacteria</i> |
| Otu0136 | 0                                         | 0.48                           | 0.09              | 0.78                  | 0.14                | 51.13                | unclass. <i>Bacteroidetes</i>       | unclass. <i>Bacteroidetes</i>       | unclass. <i>Bacteroidetes</i>       | unclass. <i>Bacteroidetes</i> | <i>Bacteroidetes</i>     | <i>Bacteria</i> |
| Otu0269 | 0                                         | 0.48                           | 0.09              | 0.78                  | 0.14                | 51.27                | unclass. <i>Gammaproteobacteria</i> | unclass. <i>Gammaproteobacteria</i> | unclass. <i>Gammaproteobacteria</i> | <i>Gammaproteobacteria</i>    | <i>Proteobacteria</i>    | <i>Bacteria</i> |
| Otu1106 | 0.4                                       | 0.4                            | 0.09              | 0.94                  | 0.14                | 51.42                | unclass. <i>Bacteria</i>            | unclass. <i>Bacteria</i>            | unclass. <i>Bacteria</i>            | unclass. <i>Bacteria</i>      | unclass. <i>Bacteria</i> | <i>Bacteria</i> |
| Otu1343 | 0.48                                      | 0                              | 0.09              | 0.79                  | 0.14                | 51.56                | <i>Planctomyces</i>                 | <i>Planctomycetaceae</i>            | <i>Planctomycetales</i>             | <i>Planctomycetacia</i>       | <i>Planctomycetes</i>    | <i>Bacteria</i> |
| Otu0833 | 0.48                                      | 0                              | 0.09              | 0.79                  | 0.14                | 51.7                 | <i>Alcanivorax</i>                  | <i>Alcanivoracaceae</i>             | <i>Oceanospirillales</i>            | <i>Gammaproteobacteria</i>    | <i>Proteobacteria</i>    | <i>Bacteria</i> |
| Otu0008 | 0.2                                       | 0.35                           | 0.09              | 0.68                  | 0.14                | 51.84                | unclass. <i>Gammaproteobacteria</i> | unclass. <i>Gammaproteobacteria</i> | unclass. <i>Gammaproteobacteria</i> | <i>Gammaproteobacteria</i>    | <i>Proteobacteria</i>    | <i>Bacteria</i> |
| Otu0137 | 0.88                                      | 1.23                           | 0.09              | 0.88                  | 0.14                | 51.98                | unclass. <i>Bacteroidetes</i>       | unclass. <i>Bacteroidetes</i>       | unclass. <i>Bacteroidetes</i>       | unclass. <i>Bacteroidetes</i> | <i>Bacteroidetes</i>     | <i>Bacteria</i> |
| Otu1103 | 0.2                                       | 0.35                           | 0.09              | 0.68                  | 0.14                | 52.11                | unclass. <i>Bacteria</i>            | unclass. <i>Bacteria</i>            | unclass. <i>Bacteria</i>            | unclass. <i>Bacteria</i>      | unclass. <i>Bacteria</i> | <i>Bacteria</i> |
| Otu0821 | 0.35                                      | 0.2                            | 0.09              | 0.69                  | 0.14                | 52.25                | unclass. <i>Bacteria</i>            | unclass. <i>Bacteria</i>            | unclass. <i>Bacteria</i>            | unclass. <i>Bacteria</i>      | unclass. <i>Bacteria</i> | <i>Bacteria</i> |
| Otu0915 | 0.4                                       | 0.2                            | 0.08              | 0.87                  | 0.13                | 52.38                | unclass. <i>Alphaproteobacteria</i> | unclass. <i>Alphaproteobacteria</i> | unclass. <i>Alphaproteobacteria</i> | <i>Alphaproteobacteria</i>    | <i>Proteobacteria</i>    | <i>Bacteria</i> |
| Otu0011 | 0.4                                       | 0.2                            | 0.08              | 0.87                  | 0.13                | 52.52                | unclass. <i>Flavobacteriaceae</i>   | <i>Flavobacteriaceae</i>            | <i>Flavobacteriales</i>             | <i>Flavobacteria</i>          | <i>Bacteroidetes</i>     | <i>Bacteria</i> |
| Otu0093 | 0.2                                       | 0.4                            | 0.08              | 0.87                  | 0.13                | 52.65                | <i>Aestuariicola</i>                | <i>Flavobacteriaceae</i>            | <i>Flavobacteriales</i>             | <i>Flavobacteria</i>          | <i>Bacteroidetes</i>     | <i>Bacteria</i> |
| Otu1304 | 0.2                                       | 0.4                            | 0.08              | 0.87                  | 0.13                | 52.78                | unclass. <i>Bacteria</i>            | unclass. <i>Bacteria</i>            | unclass. <i>Bacteria</i>            | unclass. <i>Bacteria</i>      | unclass. <i>Bacteria</i> | <i>Bacteria</i> |
| Otu0316 | 0.2                                       | 0.4                            | 0.08              | 0.87                  | 0.13                | 52.92                | unclass. <i>Bacteria</i>            | unclass. <i>Bacteria</i>            | unclass. <i>Bacteria</i>            | unclass. <i>Bacteria</i>      | unclass. <i>Bacteria</i> | <i>Bacteria</i> |
| Otu1334 | 0.2                                       | 0.4                            | 0.08              | 0.87                  | 0.13                | 53.05                | unclass. <i>Gammaproteobacteria</i> | unclass. <i>Gammaproteobacteria</i> | unclass. <i>Gammaproteobacteria</i> | <i>Gammaproteobacteria</i>    | <i>Proteobacteria</i>    | <i>Bacteria</i> |
| Otu1282 | 0.2                                       | 0.4                            | 0.08              | 0.87                  | 0.13                | 53.18                | unclass. <i>Gammaproteobacteria</i> | unclass. <i>Gammaproteobacteria</i> | unclass. <i>Gammaproteobacteria</i> | <i>Gammaproteobacteria</i>    | <i>Proteobacteria</i>    | <i>Bacteria</i> |
| Otu1286 | 0.2                                       | 0.4                            | 0.08              | 0.87                  | 0.13                | 53.31                | unclass. <i>Gammaproteobacteria</i> | unclass. <i>Gammaproteobacteria</i> | unclass. <i>Gammaproteobacteria</i> | <i>Gammaproteobacteria</i>    | <i>Proteobacteria</i>    | <i>Bacteria</i> |
| Otu1346 | 0.2                                       | 0.4                            | 0.08              | 0.87                  | 0.13                | 53.45                | unclass. <i>Planctomycetaceae</i>   | <i>Planctomycetaceae</i>            | <i>Planctomycetales</i>             | <i>Planctomycetacia</i>       | <i>Planctomycetes</i>    | <i>Bacteria</i> |
| Otu0007 | 0.2                                       | 0.4                            | 0.08              | 0.87                  | 0.13                | 53.58                | unclass. <i>Flavobacteriales</i>    | unclass. <i>Flavobacteriales</i>    | <i>Flavobacteriales</i>             | <i>Flavobacteria</i>          | <i>Bacteroidetes</i>     | <i>Bacteria</i> |
| Otu0601 | 0.8                                       | 0.6                            | 0.08              | 0.87                  | 0.13                | 53.71                | unclass. <i>Flammeovirgaceae</i>    | <i>Flammeovirgaceae</i>             | <i>Sphingobacteriales</i>           | <i>Sphingobacteria</i>        | <i>Bacteroidetes</i>     | <i>Bacteria</i> |
| Otu0064 | 0.2                                       | 0.4                            | 0.08              | 0.87                  | 0.13                | 53.84                | unclass. <i>Flavobacteriaceae</i>   | <i>Flavobacteriaceae</i>            | <i>Flavobacteriales</i>             | <i>Flavobacteria</i>          | <i>Bacteroidetes</i>     | <i>Bacteria</i> |
| Otu1396 | 0.2                                       | 0.4                            | 0.08              | 0.87                  | 0.13                | 53.97                | unclass. <i>Flavobacteriaceae</i>   | <i>Flavobacteriaceae</i>            | <i>Flavobacteriales</i>             | <i>Flavobacteria</i>          | <i>Bacteroidetes</i>     | <i>Bacteria</i> |
| Otu0709 | 0.2                                       | 0.4                            | 0.08              | 0.87                  | 0.13                | 54.1                 | unclass. <i>Bacteria</i>            | unclass. <i>Bacteria</i>            | unclass. <i>Bacteria</i>            | unclass. <i>Bacteria</i>      | unclass. <i>Bacteria</i> | <i>Bacteria</i> |
| Otu0203 | 0.4                                       | 0.2                            | 0.08              | 0.87                  | 0.13                | 54.23                | <i>Pelagibacter</i>                 | SAR11-clade                         | <i>Rickettsiales</i>                | <i>Alphaproteobacteria</i>    | <i>Proteobacteria</i>    | <i>Bacteria</i> |

| OTU     | Av.A <sub>i</sub><br>(pH <i>in situ</i> ) | Av.A <sub>i</sub><br>(pH 7.67) | Av.δ <sub>i</sub> | Av.δ <sub>i</sub> /SD | Av.δ <sub>i</sub> % | ΣAv.δ <sub>i</sub> % | Genus                               | Family                              | Order                               | Class                          | Phylum                   | Domain          |
|---------|-------------------------------------------|--------------------------------|-------------------|-----------------------|---------------------|----------------------|-------------------------------------|-------------------------------------|-------------------------------------|--------------------------------|--------------------------|-----------------|
| Otu1049 | 0.4                                       | 0.2                            | 0.08              | 0.87                  | 0.13                | 54.36                | unclass. <i>Gammaproteobacteria</i> | unclass. <i>Gammaproteobacteria</i> | unclass. <i>Gammaproteobacteria</i> | <i>Gammaproteobacteria</i>     | <i>Proteobacteria</i>    | <i>Bacteria</i> |
| Otu1199 | 0.4                                       | 0.2                            | 0.08              | 0.87                  | 0.13                | 54.49                | unclass. <i>Rhodobacteraceae</i>    | <i>Rhodobacteraceae</i>             | <i>Rhodobacterales</i>              | <i>Alphaproteobacteria</i>     | <i>Proteobacteria</i>    | <i>Bacteria</i> |
| Otu0738 | 0.4                                       | 0                              | 0.08              | 0.8                   | 0.13                | 54.62                | unclass. <i>Alphaproteobacteria</i> | unclass. <i>Alphaproteobacteria</i> | unclass. <i>Alphaproteobacteria</i> | <i>Alphaproteobacteria</i>     | <i>Proteobacteria</i>    | <i>Bacteria</i> |
| Otu1300 | 0.4                                       | 0                              | 0.08              | 0.8                   | 0.13                | 54.74                | unclass. <i>Proteobacteria</i>      | unclass. <i>Proteobacteria</i>      | unclass. <i>Proteobacteria</i>      | unclass. <i>Proteobacteria</i> | <i>Proteobacteria</i>    | <i>Bacteria</i> |
| Otu0040 | 0.28                                      | 0.2                            | 0.08              | 0.69                  | 0.12                | 54.87                | <i>Erythrobacter</i>                | <i>Erythrobacteraceae</i>           | <i>Sphingomonadales</i>             | <i>Alphaproteobacteria</i>     | <i>Proteobacteria</i>    | <i>Bacteria</i> |
| Otu1202 | 0.2                                       | 0.28                           | 0.08              | 0.7                   | 0.12                | 54.99                | unclass. <i>Gammaproteobacteria</i> | unclass. <i>Gammaproteobacteria</i> | unclass. <i>Gammaproteobacteria</i> | <i>Gammaproteobacteria</i>     | <i>Proteobacteria</i>    | <i>Bacteria</i> |
| Otu0513 | 0.28                                      | 0.2                            | 0.08              | 0.69                  | 0.12                | 55.11                | unclass. <i>Bacteroidetes</i>       | unclass. <i>Bacteroidetes</i>       | unclass. <i>Bacteroidetes</i>       | unclass. <i>Bacteroidetes</i>  | <i>Bacteroidetes</i>     | <i>Bacteria</i> |
| Otu0699 | 0.28                                      | 0.2                            | 0.08              | 0.69                  | 0.12                | 55.24                | unclass. <i>Flavobacteriales</i>    | unclass. <i>Flavobacteriales</i>    | <i>Flavobacteriales</i>             | <i>Flavobacteria</i>           | <i>Bacteroidetes</i>     | <i>Bacteria</i> |
| Otu0376 | 0.2                                       | 0.28                           | 0.08              | 0.69                  | 0.12                | 55.36                | unclass. <i>Gammaproteobacteria</i> | unclass. <i>Gammaproteobacteria</i> | unclass. <i>Gammaproteobacteria</i> | <i>Gammaproteobacteria</i>     | <i>Proteobacteria</i>    | <i>Bacteria</i> |
| Otu0892 | 0.2                                       | 0.28                           | 0.08              | 0.69                  | 0.12                | 55.48                | unclass. <i>Bacteroidetes</i>       | unclass. <i>Bacteroidetes</i>       | unclass. <i>Bacteroidetes</i>       | unclass. <i>Bacteroidetes</i>  | <i>Bacteroidetes</i>     | <i>Bacteria</i> |
| Otu1317 | 0.28                                      | 0.2                            | 0.08              | 0.69                  | 0.12                | 55.6                 | unclass. <i>Bacteria</i>            | unclass. <i>Bacteria</i>            | unclass. <i>Bacteria</i>            | unclass. <i>Bacteria</i>       | unclass. <i>Bacteria</i> | <i>Bacteria</i> |
| Otu0300 | 0.4                                       | 0                              | 0.08              | 0.8                   | 0.12                | 55.72                | unclass. <i>Gammaproteobacteria</i> | unclass. <i>Gammaproteobacteria</i> | unclass. <i>Gammaproteobacteria</i> | <i>Gammaproteobacteria</i>     | <i>Proteobacteria</i>    | <i>Bacteria</i> |
| Otu0368 | 0.4                                       | 0                              | 0.08              | 0.8                   | 0.12                | 55.84                | unclass. <i>Saprospiraceae</i>      | <i>Saprospiraceae</i>               | <i>Sphingobacteriales</i>           | <i>Sphingobacteria</i>         | <i>Bacteroidetes</i>     | <i>Bacteria</i> |
| Otu1126 | 0                                         | 0.4                            | 0.08              | 0.8                   | 0.12                | 55.97                | unclass. <i>Bacteroidetes</i>       | unclass. <i>Bacteroidetes</i>       | unclass. <i>Bacteroidetes</i>       | unclass. <i>Bacteroidetes</i>  | <i>Bacteroidetes</i>     | <i>Bacteria</i> |
| Otu1455 | 0                                         | 0.4                            | 0.08              | 0.8                   | 0.12                | 56.09                | unclass. <i>Bacteria</i>            | unclass. <i>Bacteria</i>            | unclass. <i>Bacteria</i>            | unclass. <i>Bacteria</i>       | unclass. <i>Bacteria</i> | <i>Bacteria</i> |
| Otu0151 | 0                                         | 0.4                            | 0.08              | 0.8                   | 0.12                | 56.21                | <i>Rhodococcus</i>                  | <i>Nocardiaceae</i>                 | <i>Actinomycetales</i>              | <i>Actinobacteria</i>          | <i>Actinobacteria</i>    | <i>Bacteria</i> |
| Otu0282 | 0                                         | 0.4                            | 0.08              | 0.8                   | 0.12                | 56.33                | <i>Haliea</i>                       | <i>Alteromonadaceae</i>             | <i>Alteromonadales</i>              | <i>Gammaproteobacteria</i>     | <i>Proteobacteria</i>    | <i>Bacteria</i> |
| Otu1017 | 0                                         | 0.4                            | 0.08              | 0.8                   | 0.12                | 56.45                | unclass. <i>Actinomycetales</i>     | unclass. <i>Actinomycetales</i>     | <i>Actinomycetales</i>              | <i>Actinobacteria</i>          | <i>Actinobacteria</i>    | <i>Bacteria</i> |
| Otu1563 | 0                                         | 0.4                            | 0.08              | 0.8                   | 0.12                | 56.57                | unclass. <i>Proteobacteria</i>      | unclass. <i>Proteobacteria</i>      | unclass. <i>Proteobacteria</i>      | unclass. <i>Proteobacteria</i> | <i>Proteobacteria</i>    | <i>Bacteria</i> |
| Otu1577 | 0                                         | 0.4                            | 0.08              | 0.8                   | 0.12                | 56.69                | <i>Planctomyces</i>                 | <i>Planctomycetaceae</i>            | <i>Planctomycetales</i>             | <i>Planctomycetacia</i>        | <i>Planctomycetes</i>    | <i>Bacteria</i> |
| Otu1583 | 0                                         | 0.4                            | 0.08              | 0.8                   | 0.12                | 56.81                | unclass. <i>Bacteroidetes</i>       | unclass. <i>Bacteroidetes</i>       | unclass. <i>Bacteroidetes</i>       | unclass. <i>Bacteroidetes</i>  | <i>Bacteroidetes</i>     | <i>Bacteria</i> |
| Otu1599 | 0                                         | 0.4                            | 0.08              | 0.8                   | 0.12                | 56.93                | unclass. <i>Deltaproteobacteria</i> | unclass. <i>Deltaproteobacteria</i> | unclass. <i>Deltaproteobacteria</i> | <i>Deltaproteobacteria</i>     | <i>Proteobacteria</i>    | <i>Bacteria</i> |
| Otu1224 | 0                                         | 0.4                            | 0.08              | 0.8                   | 0.12                | 57.05                | unclass. <i>Bacteria</i>            | unclass. <i>Bacteria</i>            | unclass. <i>Bacteria</i>            | unclass. <i>Bacteria</i>       | unclass. <i>Bacteria</i> | <i>Bacteria</i> |
| Otu1466 | 0                                         | 0.4                            | 0.08              | 0.8                   | 0.12                | 57.17                | unclass. <i>Gammaproteobacteria</i> | unclass. <i>Gammaproteobacteria</i> | unclass. <i>Gammaproteobacteria</i> | <i>Gammaproteobacteria</i>     | <i>Proteobacteria</i>    | <i>Bacteria</i> |
| Otu1476 | 0                                         | 0.4                            | 0.08              | 0.8                   | 0.12                | 57.29                | unclass. <i>Nannocystaceae</i>      | <i>Nannocystaceae</i>               | <i>Myxococcales</i>                 | <i>Deltaproteobacteria</i>     | <i>Proteobacteria</i>    | <i>Bacteria</i> |
| Otu1482 | 0                                         | 0.4                            | 0.08              | 0.8                   | 0.12                | 57.41                | unclass. <i>Bacteroidetes</i>       | unclass. <i>Bacteroidetes</i>       | unclass. <i>Bacteroidetes</i>       | unclass. <i>Bacteroidetes</i>  | <i>Bacteroidetes</i>     | <i>Bacteria</i> |
| Otu0752 | 0                                         | 0.4                            | 0.08              | 0.8                   | 0.12                | 57.53                | unclass. <i>Gammaproteobacteria</i> | unclass. <i>Gammaproteobacteria</i> | unclass. <i>Gammaproteobacteria</i> | <i>Gammaproteobacteria</i>     | <i>Proteobacteria</i>    | <i>Bacteria</i> |

| OTU     | Av.A <sub>i</sub><br>(pH <i>in situ</i> ) | Av.A <sub>i</sub><br>(pH 7.67) | Av.δ <sub>i</sub> | Av.δ <sub>i</sub> /SD | Av.δ <sub>i</sub> % | ΣAv.δ <sub>i</sub> % | Genus                               | Family                              | Order                               | Class                          | Phylum                   | Domain          |
|---------|-------------------------------------------|--------------------------------|-------------------|-----------------------|---------------------|----------------------|-------------------------------------|-------------------------------------|-------------------------------------|--------------------------------|--------------------------|-----------------|
| Otu0755 | 0                                         | 0.4                            | 0.08              | 0.8                   | 0.12                | 57.65                | unclass. <i>Proteobacteria</i>      | unclass. <i>Proteobacteria</i>      | unclass. <i>Proteobacteria</i>      | unclass. <i>Proteobacteria</i> | <i>Proteobacteria</i>    | <i>Bacteria</i> |
| Otu1200 | 0                                         | 0.4                            | 0.08              | 0.8                   | 0.12                | 57.78                | unclass. <i>Bacteria</i>            | unclass. <i>Bacteria</i>            | unclass. <i>Bacteria</i>            | unclass. <i>Bacteria</i>       | unclass. <i>Bacteria</i> | <i>Bacteria</i> |
| Otu1442 | 0                                         | 0.4                            | 0.08              | 0.8                   | 0.12                | 57.9                 | unclass. <i>Bacteroidetes</i>       | unclass. <i>Bacteroidetes</i>       | unclass. <i>Bacteroidetes</i>       | unclass. <i>Bacteroidetes</i>  | <i>Bacteroidetes</i>     | <i>Bacteria</i> |
| Otu1151 | 0.2                                       | 0.28                           | 0.08              | 0.69                  | 0.12                | 58.02                | unclass. <i>Gammaproteobacteria</i> | unclass. <i>Gammaproteobacteria</i> | unclass. <i>Gammaproteobacteria</i> | <i>Gammaproteobacteria</i>     | <i>Proteobacteria</i>    | <i>Bacteria</i> |
| Otu1214 | 0.2                                       | 0.28                           | 0.08              | 0.69                  | 0.12                | 58.14                | <i>Sphingobium</i>                  | <i>Sphingomonadaceae</i>            | <i>Sphingomonadales</i>             | <i>Alphaproteobacteria</i>     | <i>Proteobacteria</i>    | <i>Bacteria</i> |
| Otu0341 | 0                                         | 0.4                            | 0.08              | 0.8                   | 0.12                | 58.26                | unclass. <i>Gammaproteobacteria</i> | unclass. <i>Gammaproteobacteria</i> | unclass. <i>Gammaproteobacteria</i> | <i>Gammaproteobacteria</i>     | <i>Proteobacteria</i>    | <i>Bacteria</i> |
| Otu1009 | 0                                         | 0.4                            | 0.08              | 0.8                   | 0.12                | 58.38                | unclass. <i>Gammaproteobacteria</i> | unclass. <i>Gammaproteobacteria</i> | unclass. <i>Gammaproteobacteria</i> | <i>Gammaproteobacteria</i>     | <i>Proteobacteria</i>    | <i>Bacteria</i> |
| Otu1355 | 0                                         | 0.4                            | 0.08              | 0.8                   | 0.12                | 58.5                 | unclass. <i>Bacteria</i>            | unclass. <i>Bacteria</i>            | unclass. <i>Bacteria</i>            | unclass. <i>Bacteria</i>       | unclass. <i>Bacteria</i> | <i>Bacteria</i> |
| Otu1204 | 0                                         | 0.4                            | 0.08              | 0.8                   | 0.12                | 58.62                | unclass. <i>Bacteroidetes</i>       | unclass. <i>Bacteroidetes</i>       | unclass. <i>Bacteroidetes</i>       | unclass. <i>Bacteroidetes</i>  | <i>Bacteroidetes</i>     | <i>Bacteria</i> |
| Otu1175 | 0                                         | 0.4                            | 0.08              | 0.8                   | 0.12                | 58.74                | unclass. <i>Gammaproteobacteria</i> | unclass. <i>Gammaproteobacteria</i> | unclass. <i>Gammaproteobacteria</i> | <i>Gammaproteobacteria</i>     | <i>Proteobacteria</i>    | <i>Bacteria</i> |
| Otu1363 | 0.2                                       | 0.28                           | 0.07              | 0.69                  | 0.12                | 58.85                | unclass. <i>Rhodobacteraceae</i>    | <i>Rhodobacteraceae</i>             | <i>Rhodobacterales</i>              | <i>Alphaproteobacteria</i>     | <i>Proteobacteria</i>    | <i>Bacteria</i> |
| Otu0238 | 0                                         | 0.4                            | 0.07              | 0.8                   | 0.12                | 58.97                | <i>Haliea</i>                       | <i>Alteromonadaceae</i>             | <i>Alteromonadales</i>              | <i>Gammaproteobacteria</i>     | <i>Proteobacteria</i>    | <i>Bacteria</i> |
| Otu1194 | 0                                         | 0.4                            | 0.07              | 0.8                   | 0.12                | 59.09                | unclass. <i>Gammaproteobacteria</i> | unclass. <i>Gammaproteobacteria</i> | unclass. <i>Gammaproteobacteria</i> | <i>Gammaproteobacteria</i>     | <i>Proteobacteria</i>    | <i>Bacteria</i> |
| Otu1229 | 0                                         | 0.4                            | 0.07              | 0.8                   | 0.12                | 59.21                | <i>Haliea</i>                       | <i>Alteromonadaceae</i>             | <i>Alteromonadales</i>              | <i>Gammaproteobacteria</i>     | <i>Proteobacteria</i>    | <i>Bacteria</i> |
| Otu1483 | 0                                         | 0.4                            | 0.07              | 0.8                   | 0.12                | 59.33                | unclass. <i>Acidobacteria_Gp3</i>   | unclass. <i>Acidobacteria_Gp3</i>   | unclass. <i>Acidobacteria_Gp3</i>   | <i>Acidobacteria_Gp3</i>       | <i>Acidobacteria</i>     | <i>Bacteria</i> |
| Otu1510 | 0                                         | 0.4                            | 0.07              | 0.8                   | 0.12                | 59.45                | unclass. <i>Bacteroidetes</i>       | unclass. <i>Bacteroidetes</i>       | unclass. <i>Bacteroidetes</i>       | unclass. <i>Bacteroidetes</i>  | <i>Bacteroidetes</i>     | <i>Bacteria</i> |
| Otu0472 | 0                                         | 0.4                            | 0.07              | 0.8                   | 0.12                | 59.57                | unclass. <i>Bacteroidetes</i>       | unclass. <i>Bacteroidetes</i>       | unclass. <i>Bacteroidetes</i>       | unclass. <i>Bacteroidetes</i>  | <i>Bacteroidetes</i>     | <i>Bacteria</i> |
| Otu1141 | 0                                         | 0.4                            | 0.07              | 0.8                   | 0.12                | 59.69                | unclass. <i>Chromatiales</i>        | unclass. <i>Chromatiales</i>        | <i>Chromatiales</i>                 | <i>Gammaproteobacteria</i>     | <i>Proteobacteria</i>    | <i>Bacteria</i> |
| Otu1533 | 0                                         | 0.4                            | 0.07              | 0.8                   | 0.12                | 59.81                | unclass. <i>Saprospiraceae</i>      | <i>Saprospiraceae</i>               | <i>Sphingobacteriales</i>           | <i>Sphingobacteria</i>         | <i>Bacteroidetes</i>     | <i>Bacteria</i> |
| Otu1547 | 0                                         | 0.4                            | 0.07              | 0.8                   | 0.12                | 59.92                | unclass. <i>Gammaproteobacteria</i> | unclass. <i>Gammaproteobacteria</i> | unclass. <i>Gammaproteobacteria</i> | <i>Gammaproteobacteria</i>     | <i>Proteobacteria</i>    | <i>Bacteria</i> |
| Otu1348 | 0.4                                       | 0                              | 0.07              | 0.8                   | 0.12                | 60.04                | unclass. <i>Gammaproteobacteria</i> | unclass. <i>Gammaproteobacteria</i> | unclass. <i>Gammaproteobacteria</i> | <i>Gammaproteobacteria</i>     | <i>Proteobacteria</i>    | <i>Bacteria</i> |
| Otu0832 | 0.28                                      | 0.2                            | 0.07              | 0.7                   | 0.12                | 60.16                | unclass. <i>Rhodospirillaceae</i>   | <i>Rhodospirillaceae</i>            | <i>Rhodospirillales</i>             | <i>Alphaproteobacteria</i>     | <i>Proteobacteria</i>    | <i>Bacteria</i> |
| Otu1400 | 0.2                                       | 0.28                           | 0.07              | 0.69                  | 0.12                | 60.28                | unclass. <i>Gammaproteobacteria</i> | unclass. <i>Gammaproteobacteria</i> | unclass. <i>Gammaproteobacteria</i> | <i>Gammaproteobacteria</i>     | <i>Proteobacteria</i>    | <i>Bacteria</i> |
| Otu0177 | 0.4                                       | 0                              | 0.07              | 0.8                   | 0.12                | 60.4                 | <i>Haliea</i>                       | <i>Alteromonadaceae</i>             | <i>Alteromonadales</i>              | <i>Gammaproteobacteria</i>     | <i>Proteobacteria</i>    | <i>Bacteria</i> |
| Otu1153 | 0.4                                       | 0                              | 0.07              | 0.8                   | 0.12                | 60.52                | unclass. <i>Alphaproteobacteria</i> | unclass. <i>Alphaproteobacteria</i> | unclass. <i>Alphaproteobacteria</i> | <i>Alphaproteobacteria</i>     | <i>Proteobacteria</i>    | <i>Bacteria</i> |
| Otu0724 | 0.28                                      | 0.2                            | 0.07              | 0.69                  | 0.12                | 60.63                | unclass. <i>Bacteria</i>            | unclass. <i>Bacteria</i>            | unclass. <i>Bacteria</i>            | unclass. <i>Bacteria</i>       | unclass. <i>Bacteria</i> | <i>Bacteria</i> |
| Otu0741 | 0.4                                       | 0                              | 0.07              | 0.8                   | 0.12                | 60.75                | unclass. <i>Alphaproteobacteria</i> | unclass. <i>Alphaproteobacteria</i> | unclass. <i>Alphaproteobacteria</i> | <i>Alphaproteobacteria</i>     | <i>Proteobacteria</i>    | <i>Bacteria</i> |

| OTU     | Av.A <sub>i</sub><br>(pH <i>in situ</i> ) | Av.A <sub>i</sub><br>(pH 7.67) | Av.δ <sub>i</sub> | Av.δ <sub>i</sub> /SD | Av.δ <sub>i</sub> % | ΣAv.δ <sub>i</sub> % | Genus                               | Family                              | Order                               | Class                          | Phylum                   | Domain          |
|---------|-------------------------------------------|--------------------------------|-------------------|-----------------------|---------------------|----------------------|-------------------------------------|-------------------------------------|-------------------------------------|--------------------------------|--------------------------|-----------------|
| Otu0859 | 0.4                                       | 0                              | 0.07              | 0.8                   | 0.12                | 60.87                | unclass. <i>Flavobacteriaceae</i>   | <i>Flavobacteriaceae</i>            | <i>Flavobacteriales</i>             | <i>Flavobacteria</i>           | <i>Bacteroidetes</i>     | <i>Bacteria</i> |
| Otu1116 | 0.4                                       | 0                              | 0.07              | 0.8                   | 0.12                | 60.98                | unclass. <i>Gammaproteobacteria</i> | unclass. <i>Gammaproteobacteria</i> | unclass. <i>Gammaproteobacteria</i> | <i>Gammaproteobacteria</i>     | <i>Proteobacteria</i>    | <i>Bacteria</i> |
| Otu1148 | 0.4                                       | 0                              | 0.07              | 0.8                   | 0.12                | 61.1                 | unclass. <i>Gammaproteobacteria</i> | unclass. <i>Gammaproteobacteria</i> | unclass. <i>Gammaproteobacteria</i> | <i>Gammaproteobacteria</i>     | <i>Proteobacteria</i>    | <i>Bacteria</i> |
| Otu0490 | 1.94                                      | 2.22                           | 0.07              | 1.55                  | 0.11                | 61.21                | unclass. <i>Burkholderiales</i>     | unclass. <i>Burkholderiales</i>     | <i>Burkholderiales</i>              | <i>Betaproteobacteria</i>      | <i>Proteobacteria</i>    | <i>Bacteria</i> |
| Otu1238 | 0                                         | 0.35                           | 0.07              | 0.49                  | 0.1                 | 61.31                | unclass. <i>Opitutae</i>            | unclass. <i>Opitutae</i>            | unclass. <i>Opitutae</i>            | <i>Opitutae</i>                | <i>Verrucomicrobia</i>   | <i>Bacteria</i> |
| Otu1418 | 0                                         | 0.35                           | 0.07              | 0.49                  | 0.1                 | 61.42                | unclass. <i>Flammeovirgaceae</i>    | <i>Flammeovirgaceae</i>             | <i>Sphingobacteriales</i>           | <i>Sphingobacteria</i>         | <i>Bacteroidetes</i>     | <i>Bacteria</i> |
| Otu0313 | 0                                         | 0.35                           | 0.06              | 0.49                  | 0.1                 | 61.52                | unclass. <i>Gammaproteobacteria</i> | unclass. <i>Gammaproteobacteria</i> | unclass. <i>Gammaproteobacteria</i> | <i>Gammaproteobacteria</i>     | <i>Proteobacteria</i>    | <i>Bacteria</i> |
| Otu1401 | 0                                         | 0.35                           | 0.06              | 0.49                  | 0.1                 | 61.62                | unclass. <i>Gammaproteobacteria</i> | unclass. <i>Gammaproteobacteria</i> | unclass. <i>Gammaproteobacteria</i> | <i>Gammaproteobacteria</i>     | <i>Proteobacteria</i>    | <i>Bacteria</i> |
| Otu1098 | 0.35                                      | 0                              | 0.06              | 0.49                  | 0.1                 | 61.72                | unclass. <i>Flavobacteriaceae</i>   | <i>Flavobacteriaceae</i>            | <i>Flavobacteriales</i>             | <i>Flavobacteria</i>           | <i>Bacteroidetes</i>     | <i>Bacteria</i> |
| Otu0280 | 0.2                                       | 0.2                            | 0.06              | 0.67                  | 0.1                 | 61.82                | <i>Marinobacter</i>                 | <i>Alteromonadaceae</i>             | <i>Alteromonadales</i>              | <i>Gammaproteobacteria</i>     | <i>Proteobacteria</i>    | <i>Bacteria</i> |
| Otu0928 | 0.2                                       | 0.2                            | 0.06              | 0.67                  | 0.1                 | 61.92                | <i>Crocinitomix</i>                 | <i>Cryomorphaceae</i>               | <i>Flavobacteriales</i>             | <i>Flavobacteria</i>           | <i>Bacteroidetes</i>     | <i>Bacteria</i> |
| Otu0740 | 0.2                                       | 0.2                            | 0.06              | 0.67                  | 0.1                 | 62.02                | unclass. <i>Betaproteobacteria</i>  | unclass. <i>Betaproteobacteria</i>  | unclass. <i>Betaproteobacteria</i>  | <i>Betaproteobacteria</i>      | <i>Proteobacteria</i>    | <i>Bacteria</i> |
| Otu1298 | 0.2                                       | 0.2                            | 0.06              | 0.67                  | 0.1                 | 62.12                | unclass. <i>Gammaproteobacteria</i> | unclass. <i>Gammaproteobacteria</i> | unclass. <i>Gammaproteobacteria</i> | <i>Gammaproteobacteria</i>     | <i>Proteobacteria</i>    | <i>Bacteria</i> |
| Otu1310 | 0.2                                       | 0.2                            | 0.06              | 0.67                  | 0.1                 | 62.21                | unclass. <i>Gammaproteobacteria</i> | unclass. <i>Gammaproteobacteria</i> | unclass. <i>Gammaproteobacteria</i> | <i>Gammaproteobacteria</i>     | <i>Proteobacteria</i>    | <i>Bacteria</i> |
| Otu0042 | 0.2                                       | 0.2                            | 0.06              | 0.67                  | 0.1                 | 62.31                | <i>Rhodococcus</i>                  | <i>Nocardiaceae</i>                 | <i>Actinomycetales</i>              | <i>Actinobacteria</i>          | <i>Actinobacteria</i>    | <i>Bacteria</i> |
| Otu1127 | 0.2                                       | 0.2                            | 0.06              | 0.67                  | 0.1                 | 62.41                | unclass. <i>Flavobacteriales</i>    | unclass. <i>Flavobacteriales</i>    | <i>Flavobacteriales</i>             | <i>Flavobacteria</i>           | <i>Bacteroidetes</i>     | <i>Bacteria</i> |
| Otu1237 | 0.2                                       | 0.2                            | 0.06              | 0.67                  | 0.1                 | 62.51                | unclass. <i>Gammaproteobacteria</i> | unclass. <i>Gammaproteobacteria</i> | unclass. <i>Gammaproteobacteria</i> | <i>Gammaproteobacteria</i>     | <i>Proteobacteria</i>    | <i>Bacteria</i> |
| Otu0370 | 0.2                                       | 0.2                            | 0.06              | 0.67                  | 0.1                 | 62.6                 | unclass. <i>Gammaproteobacteria</i> | unclass. <i>Gammaproteobacteria</i> | unclass. <i>Gammaproteobacteria</i> | <i>Gammaproteobacteria</i>     | <i>Proteobacteria</i>    | <i>Bacteria</i> |
| Otu0378 | 0.2                                       | 0.2                            | 0.06              | 0.67                  | 0.1                 | 62.7                 | unclass. <i>Rickettsiaceae</i>      | <i>Rickettsiaceae</i>               | <i>Rickettsiales</i>                | <i>Alphaproteobacteria</i>     | <i>Proteobacteria</i>    | <i>Bacteria</i> |
| Otu1254 | 0.2                                       | 0.2                            | 0.06              | 0.67                  | 0.1                 | 62.8                 | unclass. <i>Gammaproteobacteria</i> | unclass. <i>Gammaproteobacteria</i> | unclass. <i>Gammaproteobacteria</i> | <i>Gammaproteobacteria</i>     | <i>Proteobacteria</i>    | <i>Bacteria</i> |
| Otu0732 | 0.2                                       | 0.2                            | 0.06              | 0.67                  | 0.1                 | 62.89                | unclass. <i>Proteobacteria</i>      | unclass. <i>Proteobacteria</i>      | unclass. <i>Proteobacteria</i>      | unclass. <i>Proteobacteria</i> | <i>Proteobacteria</i>    | <i>Bacteria</i> |
| Otu1146 | 0.2                                       | 0.2                            | 0.06              | 0.67                  | 0.1                 | 62.99                | <i>Nitrosospira</i>                 | <i>Nitrosomonadaceae</i>            | <i>Nitrosomonadales</i>             | <i>Betaproteobacteria</i>      | <i>Proteobacteria</i>    | <i>Bacteria</i> |
| Otu1132 | 0.2                                       | 0.2                            | 0.06              | 0.67                  | 0.1                 | 63.08                | unclass. <i>Flavobacteriales</i>    | unclass. <i>Flavobacteriales</i>    | <i>Flavobacteriales</i>             | <i>Flavobacteria</i>           | <i>Bacteroidetes</i>     | <i>Bacteria</i> |
| Otu1260 | 0.2                                       | 0.2                            | 0.06              | 0.67                  | 0.1                 | 63.18                | <i>Marinobacterium</i>              | <i>Alteromonadaceae</i>             | <i>Alteromonadales</i>              | <i>Gammaproteobacteria</i>     | <i>Proteobacteria</i>    | <i>Bacteria</i> |
| Otu1261 | 0.2                                       | 0.2                            | 0.06              | 0.67                  | 0.1                 | 63.28                | unclass. <i>Gammaproteobacteria</i> | unclass. <i>Gammaproteobacteria</i> | unclass. <i>Gammaproteobacteria</i> | <i>Gammaproteobacteria</i>     | <i>Proteobacteria</i>    | <i>Bacteria</i> |
| Otu0839 | 0.2                                       | 0.2                            | 0.06              | 0.67                  | 0.1                 | 63.37                | unclass. <i>Bacteria</i>            | unclass. <i>Bacteria</i>            | unclass. <i>Bacteria</i>            | unclass. <i>Bacteria</i>       | unclass. <i>Bacteria</i> | <i>Bacteria</i> |
| Otu0651 | 0.2                                       | 0.2                            | 0.06              | 0.67                  | 0.1                 | 63.47                | <i>Arcobacter</i>                   | <i>Campylobacteraceae</i>           | <i>Campylobacterales</i>            | <i>Epsilonproteobacteria</i>   | <i>Proteobacteria</i>    | <i>Bacteria</i> |

| OTU     | Av.A <sub>i</sub><br>(pH <i>in situ</i> ) | Av.A <sub>i</sub><br>(pH 7.67) | Av.δ <sub>i</sub> | Av.δ <sub>i</sub> /SD | Av.δ <sub>i</sub> % | ΣAv.δ <sub>i</sub> % | Genus                               | Family                              | Order                               | Class                           | Phylum                   | Domain          |
|---------|-------------------------------------------|--------------------------------|-------------------|-----------------------|---------------------|----------------------|-------------------------------------|-------------------------------------|-------------------------------------|---------------------------------|--------------------------|-----------------|
| Otu1120 | 0.2                                       | 0.2                            | 0.06              | 0.67                  | 0.1                 | 63.56                | unclass. <i>Bacteria</i>            | unclass. <i>Bacteria</i>            | unclass. <i>Bacteria</i>            | unclass. <i>Bacteria</i>        | unclass. <i>Bacteria</i> | <i>Bacteria</i> |
| Otu1257 | 0.2                                       | 0.2                            | 0.06              | 0.67                  | 0.1                 | 63.66                | unclass. <i>Gammaproteobacteria</i> | unclass. <i>Gammaproteobacteria</i> | unclass. <i>Gammaproteobacteria</i> | <i>Gammaproteobacteria</i>      | <i>Proteobacteria</i>    | <i>Bacteria</i> |
| Otu0698 | 0.2                                       | 0.2                            | 0.06              | 0.67                  | 0.09                | 63.75                | unclass. <i>Proteobacteria</i>      | unclass. <i>Proteobacteria</i>      | unclass. <i>Proteobacteria</i>      | unclass. <i>Proteobacteria</i>  | <i>Proteobacteria</i>    | <i>Bacteria</i> |
| Otu0727 | 0.2                                       | 0.2                            | 0.06              | 0.67                  | 0.09                | 63.85                | unclass. <i>Deltaproteobacteria</i> | unclass. <i>Deltaproteobacteria</i> | unclass. <i>Deltaproteobacteria</i> | <i>Deltaproteobacteria</i>      | <i>Proteobacteria</i>    | <i>Bacteria</i> |
| Otu0148 | 0.2                                       | 0.2                            | 0.06              | 0.67                  | 0.09                | 63.94                | unclass. <i>Sphingobacteriales</i>  | unclass. <i>Sphingobacteriales</i>  | <i>Sphingobacteriales</i>           | <i>Sphingobacteria</i>          | <i>Bacteroidetes</i>     | <i>Bacteria</i> |
| Otu0519 | 0.2                                       | 0.2                            | 0.06              | 0.67                  | 0.09                | 64.04                | unclass. <i>Rhodospirillaceae</i>   | <i>Rhodospirillaceae</i>            | <i>Rhodospirillales</i>             | <i>Alphaproteobacteria</i>      | <i>Proteobacteria</i>    | <i>Bacteria</i> |
| Otu1121 | 0.2                                       | 0.2                            | 0.06              | 0.67                  | 0.09                | 64.13                | unclass. <i>Gammaproteobacteria</i> | unclass. <i>Gammaproteobacteria</i> | unclass. <i>Gammaproteobacteria</i> | <i>Gammaproteobacteria</i>      | <i>Proteobacteria</i>    | <i>Bacteria</i> |
| Otu1124 | 0.2                                       | 0.2                            | 0.06              | 0.67                  | 0.09                | 64.23                | unclass. <i>Gammaproteobacteria</i> | unclass. <i>Gammaproteobacteria</i> | unclass. <i>Gammaproteobacteria</i> | <i>Gammaproteobacteria</i>      | <i>Proteobacteria</i>    | <i>Bacteria</i> |
| Otu1128 | 0.2                                       | 0.2                            | 0.06              | 0.67                  | 0.09                | 64.32                | unclass. <i>Colwelliaceae</i>       | <i>Colwelliaceae</i>                | <i>Alteromonadales</i>              | <i>Gammaproteobacteria</i>      | <i>Proteobacteria</i>    | <i>Bacteria</i> |
| Otu1203 | 0.2                                       | 0.2                            | 0.06              | 0.67                  | 0.09                | 64.42                | unclass. <i>Proteobacteria</i>      | unclass. <i>Proteobacteria</i>      | unclass. <i>Proteobacteria</i>      | unclass. <i>Proteobacteria</i>  | <i>Proteobacteria</i>    | <i>Bacteria</i> |
| Otu0908 | 0.2                                       | 0.2                            | 0.06              | 0.67                  | 0.09                | 64.51                | unclass. <i>Proteobacteria</i>      | unclass. <i>Proteobacteria</i>      | unclass. <i>Proteobacteria</i>      | unclass. <i>Proteobacteria</i>  | <i>Proteobacteria</i>    | <i>Bacteria</i> |
| Otu1352 | 0.2                                       | 0.2                            | 0.06              | 0.67                  | 0.09                | 64.6                 | unclass. <i>Flavobacteriaceae</i>   | <i>Flavobacteriaceae</i>            | <i>Flavobacteriales</i>             | <i>Flavobacteria</i>            | <i>Bacteroidetes</i>     | <i>Bacteria</i> |
| Otu1361 | 0.2                                       | 0.2                            | 0.06              | 0.67                  | 0.09                | 64.7                 | unclass. <i>Bacteria</i>            | unclass. <i>Bacteria</i>            | unclass. <i>Bacteria</i>            | unclass. <i>Bacteria</i>        | unclass. <i>Bacteria</i> | <i>Bacteria</i> |
| Otu1408 | 0.2                                       | 0.2                            | 0.06              | 0.67                  | 0.09                | 64.79                | unclass. <i>Oceanospirillales</i>   | unclass. <i>Oceanospirillales</i>   | <i>Oceanospirillales</i>            | <i>Gammaproteobacteria</i>      | <i>Proteobacteria</i>    | <i>Bacteria</i> |
| Otu0031 | 0.2                                       | 0.2                            | 0.06              | 0.67                  | 0.09                | 64.89                | unclass. <i>Gammaproteobacteria</i> | unclass. <i>Gammaproteobacteria</i> | unclass. <i>Gammaproteobacteria</i> | <i>Gammaproteobacteria</i>      | <i>Proteobacteria</i>    | <i>Bacteria</i> |
| Otu0262 | 0.2                                       | 0.2                            | 0.06              | 0.67                  | 0.09                | 64.98                | unclass. <i>Gammaproteobacteria</i> | unclass. <i>Gammaproteobacteria</i> | unclass. <i>Gammaproteobacteria</i> | <i>Gammaproteobacteria</i>      | <i>Proteobacteria</i>    | <i>Bacteria</i> |
| Otu1145 | 0.2                                       | 0.2                            | 0.06              | 0.67                  | 0.09                | 65.08                | unclass. <i>Bacteria</i>            | unclass. <i>Bacteria</i>            | unclass. <i>Bacteria</i>            | unclass. <i>Bacteria</i>        | unclass. <i>Bacteria</i> | <i>Bacteria</i> |
| Otu1356 | 0.2                                       | 0.2                            | 0.06              | 0.67                  | 0.09                | 65.17                | unclass. <i>Gammaproteobacteria</i> | unclass. <i>Gammaproteobacteria</i> | unclass. <i>Gammaproteobacteria</i> | <i>Gammaproteobacteria</i>      | <i>Proteobacteria</i>    | <i>Bacteria</i> |
| Otu1377 | 0.2                                       | 0.2                            | 0.06              | 0.67                  | 0.09                | 65.26                | unclass. <i>Proteobacteria</i>      | unclass. <i>Proteobacteria</i>      | unclass. <i>Proteobacteria</i>      | unclass. <i>Proteobacteria</i>  | <i>Proteobacteria</i>    | <i>Bacteria</i> |
| Otu1405 | 0.2                                       | 0.2                            | 0.06              | 0.67                  | 0.09                | 65.36                | unclass. <i>Bacteroidetes</i>       | unclass. <i>Bacteroidetes</i>       | unclass. <i>Bacteroidetes</i>       | unclass. <i>Bacteroidetes</i>   | <i>Bacteroidetes</i>     | <i>Bacteria</i> |
| Otu0140 | 0.2                                       | 0.2                            | 0.06              | 0.67                  | 0.09                | 65.45                | <i>Oleispira</i>                    | <i>Oceanospirillaceae</i>           | <i>Oceanospirillales</i>            | <i>Gammaproteobacteria</i>      | <i>Proteobacteria</i>    | <i>Bacteria</i> |
| Otu1388 | 0.2                                       | 0.2                            | 0.06              | 0.67                  | 0.09                | 65.55                | unclass. <i>Bacteria</i>            | unclass. <i>Bacteria</i>            | unclass. <i>Bacteria</i>            | unclass. <i>Bacteria</i>        | unclass. <i>Bacteria</i> | <i>Bacteria</i> |
| Otu1283 | 0.28                                      | 0                              | 0.06              | 0.49                  | 0.09                | 65.64                | <i>Croceibacter</i>                 | <i>Flavobacteriaceae</i>            | <i>Flavobacteriales</i>             | <i>Flavobacteria</i>            | <i>Bacteroidetes</i>     | <i>Bacteria</i> |
| Otu0739 | 0.28                                      | 0                              | 0.05              | 0.49                  | 0.09                | 65.72                | unclass. <i>Proteobacteria</i>      | unclass. <i>Proteobacteria</i>      | unclass. <i>Proteobacteria</i>      | unclass. <i>Proteobacteria</i>  | <i>Proteobacteria</i>    | <i>Bacteria</i> |
| Otu0273 | 0                                         | 0.28                           | 0.05              | 0.49                  | 0.09                | 65.81                | unclass. <i>Bacteroidetes</i>       | unclass. <i>Bacteroidetes</i>       | unclass. <i>Bacteroidetes</i>       | unclass. <i>Bacteroidetes</i>   | <i>Bacteroidetes</i>     | <i>Bacteria</i> |
| Otu0743 | 0                                         | 0.28                           | 0.05              | 0.49                  | 0.09                | 65.9                 | unclass. <i>Verrucomicrobia</i>     | unclass. <i>Verrucomicrobia</i>     | unclass. <i>Verrucomicrobia</i>     | unclass. <i>Verrucomicrobia</i> | <i>Verrucomicrobia</i>   | <i>Bacteria</i> |
| Otu0868 | 0                                         | 0.28                           | 0.05              | 0.49                  | 0.09                | 65.98                | unclass. <i>Alphaproteobacteria</i> | unclass. <i>Alphaproteobacteria</i> | unclass. <i>Alphaproteobacteria</i> | <i>Alphaproteobacteria</i>      | <i>Proteobacteria</i>    | <i>Bacteria</i> |

| OTU     | Av.A <sub>i</sub><br>(pH <i>in situ</i> ) | Av.A <sub>i</sub><br>(pH 7.67) | Av.δ <sub>i</sub> | Av.δ <sub>i</sub> /SD | Av.δ <sub>i</sub> % | ΣAv.δ <sub>i</sub> % | Genus                               | Family                              | Order                               | Class                           | Phylum                   | Domain          |
|---------|-------------------------------------------|--------------------------------|-------------------|-----------------------|---------------------|----------------------|-------------------------------------|-------------------------------------|-------------------------------------|---------------------------------|--------------------------|-----------------|
| Otu1213 | 0                                         | 0.28                           | 0.05              | 0.49                  | 0.09                | 66.07                | unclass. <i>Gammaproteobacteria</i> | unclass. <i>Gammaproteobacteria</i> | unclass. <i>Gammaproteobacteria</i> | <i>Gammaproteobacteria</i>      | <i>Proteobacteria</i>    | <i>Bacteria</i> |
| Otu1603 | 0                                         | 0.28                           | 0.05              | 0.49                  | 0.09                | 66.15                | unclass. <i>Gammaproteobacteria</i> | unclass. <i>Gammaproteobacteria</i> | unclass. <i>Gammaproteobacteria</i> | <i>Gammaproteobacteria</i>      | <i>Proteobacteria</i>    | <i>Bacteria</i> |
| Otu1604 | 0                                         | 0.28                           | 0.05              | 0.49                  | 0.09                | 66.24                | unclass. <i>Gammaproteobacteria</i> | unclass. <i>Gammaproteobacteria</i> | unclass. <i>Gammaproteobacteria</i> | <i>Gammaproteobacteria</i>      | <i>Proteobacteria</i>    | <i>Bacteria</i> |
| Otu1613 | 0                                         | 0.28                           | 0.05              | 0.49                  | 0.09                | 66.33                | unclass. <i>Proteobacteria</i>      | unclass. <i>Proteobacteria</i>      | unclass. <i>Proteobacteria</i>      | unclass. <i>Proteobacteria</i>  | <i>Proteobacteria</i>    | <i>Bacteria</i> |
| Otu1368 | 0                                         | 0.28                           | 0.05              | 0.49                  | 0.09                | 66.41                | unclass. <i>Gammaproteobacteria</i> | unclass. <i>Gammaproteobacteria</i> | unclass. <i>Gammaproteobacteria</i> | <i>Gammaproteobacteria</i>      | <i>Proteobacteria</i>    | <i>Bacteria</i> |
| Otu1416 | 0                                         | 0.28                           | 0.05              | 0.49                  | 0.09                | 66.5                 | unclass. <i>Verrucomicrobia</i>     | unclass. <i>Verrucomicrobia</i>     | unclass. <i>Verrucomicrobia</i>     | unclass. <i>Verrucomicrobia</i> | <i>Verrucomicrobia</i>   | <i>Bacteria</i> |
| Otu0856 | 0                                         | 0.28                           | 0.05              | 0.49                  | 0.08                | 66.58                | unclass. <i>Gammaproteobacteria</i> | unclass. <i>Gammaproteobacteria</i> | unclass. <i>Gammaproteobacteria</i> | <i>Gammaproteobacteria</i>      | <i>Proteobacteria</i>    | <i>Bacteria</i> |
| Otu1365 | 0                                         | 0.28                           | 0.05              | 0.49                  | 0.08                | 66.67                | unclass. <i>Bacteria</i>            | unclass. <i>Bacteria</i>            | unclass. <i>Bacteria</i>            | unclass. <i>Bacteria</i>        | unclass. <i>Bacteria</i> | <i>Bacteria</i> |
| Otu1422 | 0                                         | 0.28                           | 0.05              | 0.49                  | 0.08                | 66.75                | unclass. <i>Pseudomonadales</i>     | unclass. <i>Pseudomonadales</i>     | <i>Pseudomonadales</i>              | <i>Gammaproteobacteria</i>      | <i>Proteobacteria</i>    | <i>Bacteria</i> |
| Otu1651 | 0                                         | 0.28                           | 0.05              | 0.49                  | 0.08                | 66.84                | unclass. <i>Deltaproteobacteria</i> | unclass. <i>Deltaproteobacteria</i> | unclass. <i>Deltaproteobacteria</i> | <i>Deltaproteobacteria</i>      | <i>Proteobacteria</i>    | <i>Bacteria</i> |
| Otu1652 | 0                                         | 0.28                           | 0.05              | 0.49                  | 0.08                | 66.92                | unclass. <i>Gammaproteobacteria</i> | unclass. <i>Gammaproteobacteria</i> | unclass. <i>Gammaproteobacteria</i> | <i>Gammaproteobacteria</i>      | <i>Proteobacteria</i>    | <i>Bacteria</i> |
| Otu1653 | 0                                         | 0.28                           | 0.05              | 0.49                  | 0.08                | 67.01                | unclass. <i>Proteobacteria</i>      | unclass. <i>Proteobacteria</i>      | unclass. <i>Proteobacteria</i>      | unclass. <i>Proteobacteria</i>  | <i>Proteobacteria</i>    | <i>Bacteria</i> |
| Otu1659 | 0                                         | 0.28                           | 0.05              | 0.49                  | 0.08                | 67.09                | unclass. <i>Sphingomonadaceae</i>   | <i>Sphingomonadaceae</i>            | <i>Sphingomonadales</i>             | <i>Alphaproteobacteria</i>      | <i>Proteobacteria</i>    | <i>Bacteria</i> |
| Otu1206 | 0                                         | 0.28                           | 0.05              | 0.49                  | 0.08                | 67.18                | unclass. <i>Bacteria</i>            | unclass. <i>Bacteria</i>            | unclass. <i>Bacteria</i>            | unclass. <i>Bacteria</i>        | unclass. <i>Bacteria</i> | <i>Bacteria</i> |
| Otu1299 | 0                                         | 0.28                           | 0.05              | 0.49                  | 0.08                | 67.26                | unclass. <i>Bacteroidetes</i>       | unclass. <i>Bacteroidetes</i>       | unclass. <i>Bacteroidetes</i>       | unclass. <i>Bacteroidetes</i>   | <i>Bacteroidetes</i>     | <i>Bacteria</i> |
| Otu1315 | 0                                         | 0.28                           | 0.05              | 0.49                  | 0.08                | 67.35                | unclass. <i>Gammaproteobacteria</i> | unclass. <i>Gammaproteobacteria</i> | unclass. <i>Gammaproteobacteria</i> | <i>Gammaproteobacteria</i>      | <i>Proteobacteria</i>    | <i>Bacteria</i> |
| Otu1439 | 0                                         | 0.28                           | 0.05              | 0.49                  | 0.08                | 67.43                | unclass. <i>Gammaproteobacteria</i> | unclass. <i>Gammaproteobacteria</i> | unclass. <i>Gammaproteobacteria</i> | <i>Gammaproteobacteria</i>      | <i>Proteobacteria</i>    | <i>Bacteria</i> |
| Otu1554 | 0                                         | 0.28                           | 0.05              | 0.49                  | 0.08                | 67.51                | unclass. <i>Bacteroidetes</i>       | unclass. <i>Bacteroidetes</i>       | unclass. <i>Bacteroidetes</i>       | unclass. <i>Bacteroidetes</i>   | <i>Bacteroidetes</i>     | <i>Bacteria</i> |
| Otu1556 | 0                                         | 0.28                           | 0.05              | 0.49                  | 0.08                | 67.6                 | unclass. <i>Sphingobacteriales</i>  | unclass. <i>Sphingobacteriales</i>  | <i>Sphingobacteriales</i>           | <i>Sphingobacteria</i>          | <i>Bacteroidetes</i>     | <i>Bacteria</i> |
| Otu1557 | 0                                         | 0.28                           | 0.05              | 0.49                  | 0.08                | 67.68                | unclass. <i>Gammaproteobacteria</i> | unclass. <i>Gammaproteobacteria</i> | unclass. <i>Gammaproteobacteria</i> | <i>Gammaproteobacteria</i>      | <i>Proteobacteria</i>    | <i>Bacteria</i> |
| Otu1565 | 0                                         | 0.28                           | 0.05              | 0.49                  | 0.08                | 67.77                | unclass. <i>Alphaproteobacteria</i> | unclass. <i>Alphaproteobacteria</i> | unclass. <i>Alphaproteobacteria</i> | <i>Alphaproteobacteria</i>      | <i>Proteobacteria</i>    | <i>Bacteria</i> |
| Otu0256 | 0.28                                      | 0                              | 0.05              | 0.49                  | 0.08                | 67.85                | <i>Glaciecola</i>                   | <i>Alteromonadaceae</i>             | <i>Alteromonadales</i>              | <i>Gammaproteobacteria</i>      | <i>Proteobacteria</i>    | <i>Bacteria</i> |
| Otu1007 | 0.28                                      | 0                              | 0.05              | 0.49                  | 0.08                | 67.94                | unclass. <i>Erythrobacteraceae</i>  | <i>Erythrobacteraceae</i>           | <i>Sphingomonadales</i>             | <i>Alphaproteobacteria</i>      | <i>Proteobacteria</i>    | <i>Bacteria</i> |
| Otu1233 | 0.28                                      | 0                              | 0.05              | 0.49                  | 0.08                | 68.02                | unclass. <i>Flavobacteriaceae</i>   | <i>Flavobacteriaceae</i>            | <i>Flavobacteriales</i>             | <i>Flavobacteria</i>            | <i>Bacteroidetes</i>     | <i>Bacteria</i> |
| Otu1276 | 0.28                                      | 0                              | 0.05              | 0.49                  | 0.08                | 68.11                | unclass. <i>Flammeovirgaceae</i>    | <i>Flammeovirgaceae</i>             | <i>Sphingobacteriales</i>           | <i>Sphingobacteria</i>          | <i>Bacteroidetes</i>     | <i>Bacteria</i> |
| Otu0488 | 0                                         | 0.28                           | 0.05              | 0.49                  | 0.08                | 68.19                | unclass. <i>Gammaproteobacteria</i> | unclass. <i>Gammaproteobacteria</i> | unclass. <i>Gammaproteobacteria</i> | <i>Gammaproteobacteria</i>      | <i>Proteobacteria</i>    | <i>Bacteria</i> |
| Otu1487 | 0                                         | 0.28                           | 0.05              | 0.49                  | 0.08                | 68.27                | unclass. <i>Bacteria</i>            | unclass. <i>Bacteria</i>            | unclass. <i>Bacteria</i>            | unclass. <i>Bacteria</i>        | unclass. <i>Bacteria</i> | <i>Bacteria</i> |

| OTU     | Av.A <sub>i</sub><br>(pH <i>in situ</i> ) | Av.A <sub>i</sub><br>(pH 7.67) | Av.δ <sub>i</sub> | Av.δ <sub>i</sub> /SD | Av.δ <sub>i</sub> % | ΣAv.δ <sub>i</sub> % | Genus                               | Family                              | Order                               | Class                          | Phylum                   | Domain          |
|---------|-------------------------------------------|--------------------------------|-------------------|-----------------------|---------------------|----------------------|-------------------------------------|-------------------------------------|-------------------------------------|--------------------------------|--------------------------|-----------------|
| Otu1491 | 0                                         | 0.28                           | 0.05              | 0.49                  | 0.08                | 68.36                | unclass. <i>Bacteria</i>            | unclass. <i>Bacteria</i>            | unclass. <i>Bacteria</i>            | unclass. <i>Bacteria</i>       | unclass. <i>Bacteria</i> | <i>Bacteria</i> |
| Otu1493 | 0                                         | 0.28                           | 0.05              | 0.49                  | 0.08                | 68.44                | <i>Amphritea</i>                    | <i>Oceanospirillaceae</i>           | <i>Oceanospirillales</i>            | <i>Gammaproteobacteria</i>     | <i>Proteobacteria</i>    | <i>Bacteria</i> |
| Otu1536 | 0                                         | 0.28                           | 0.05              | 0.49                  | 0.08                | 68.52                | <i>Nannocystis</i>                  | <i>Nannocystaceae</i>               | <i>Myxococcales</i>                 | <i>Deltaproteobacteria</i>     | <i>Proteobacteria</i>    | <i>Bacteria</i> |
| Otu1134 | 0.28                                      | 0                              | 0.05              | 0.49                  | 0.08                | 68.6                 | unclass. <i>Gammaproteobacteria</i> | unclass. <i>Gammaproteobacteria</i> | unclass. <i>Gammaproteobacteria</i> | <i>Gammaproteobacteria</i>     | <i>Proteobacteria</i>    | <i>Bacteria</i> |
| Otu0518 | 0.28                                      | 0                              | 0.05              | 0.49                  | 0.08                | 68.69                | unclass. <i>Proteobacteria</i>      | unclass. <i>Proteobacteria</i>      | unclass. <i>Proteobacteria</i>      | unclass. <i>Proteobacteria</i> | <i>Proteobacteria</i>    | <i>Bacteria</i> |
| Otu1235 | 0.28                                      | 0                              | 0.05              | 0.49                  | 0.08                | 68.77                | unclass. <i>Proteobacteria</i>      | unclass. <i>Proteobacteria</i>      | unclass. <i>Proteobacteria</i>      | unclass. <i>Proteobacteria</i> | <i>Proteobacteria</i>    | <i>Bacteria</i> |
| Otu1278 | 0.28                                      | 0                              | 0.05              | 0.49                  | 0.08                | 68.85                | unclass. <i>Betaproteobacteria</i>  | unclass. <i>Betaproteobacteria</i>  | unclass. <i>Betaproteobacteria</i>  | <i>Betaproteobacteria</i>      | <i>Proteobacteria</i>    | <i>Bacteria</i> |
| Otu0253 | 0.2                                       | 0                              | 0.04              | 0.49                  | 0.06                | 68.91                | unclass. <i>Saprospiraceae</i>      | <i>Saprospiraceae</i>               | <i>Sphingobacteriales</i>           | <i>Sphingobacteria</i>         | <i>Bacteroidetes</i>     | <i>Bacteria</i> |
| Otu0324 | 0.2                                       | 0                              | 0.04              | 0.49                  | 0.06                | 68.98                | <i>Nisaea</i>                       | <i>Rhodospirillaceae</i>            | <i>Rhodospirillales</i>             | <i>Alphaproteobacteria</i>     | <i>Proteobacteria</i>    | <i>Bacteria</i> |
| Otu0558 | 0.2                                       | 0                              | 0.04              | 0.49                  | 0.06                | 69.04                | unclass. <i>Gammaproteobacteria</i> | unclass. <i>Gammaproteobacteria</i> | unclass. <i>Gammaproteobacteria</i> | <i>Gammaproteobacteria</i>     | <i>Proteobacteria</i>    | <i>Bacteria</i> |
| Otu0704 | 0.2                                       | 0                              | 0.04              | 0.49                  | 0.06                | 69.1                 | unclass. <i>Proteobacteria</i>      | unclass. <i>Proteobacteria</i>      | unclass. <i>Proteobacteria</i>      | unclass. <i>Proteobacteria</i> | <i>Proteobacteria</i>    | <i>Bacteria</i> |
| Otu1215 | 0.2                                       | 0                              | 0.04              | 0.49                  | 0.06                | 69.17                | unclass. <i>Gammaproteobacteria</i> | unclass. <i>Gammaproteobacteria</i> | unclass. <i>Gammaproteobacteria</i> | <i>Gammaproteobacteria</i>     | <i>Proteobacteria</i>    | <i>Bacteria</i> |
| Otu1284 | 0.2                                       | 0                              | 0.04              | 0.49                  | 0.06                | 69.23                | unclass. <i>Bacteroidetes</i>       | unclass. <i>Bacteroidetes</i>       | unclass. <i>Bacteroidetes</i>       | unclass. <i>Bacteroidetes</i>  | <i>Bacteroidetes</i>     | <i>Bacteria</i> |
| Otu1285 | 0.2                                       | 0                              | 0.04              | 0.49                  | 0.06                | 69.29                | unclass. <i>Myxococcales</i>        | unclass. <i>Myxococcales</i>        | <i>Myxococcales</i>                 | <i>Deltaproteobacteria</i>     | <i>Proteobacteria</i>    | <i>Bacteria</i> |
| Otu1287 | 0.2                                       | 0                              | 0.04              | 0.49                  | 0.06                | 69.36                | unclass. <i>Flavobacteriaceae</i>   | <i>Flavobacteriaceae</i>            | <i>Flavobacteriales</i>             | <i>Flavobacteria</i>           | <i>Bacteroidetes</i>     | <i>Bacteria</i> |
| Otu1288 | 0.2                                       | 0                              | 0.04              | 0.49                  | 0.06                | 69.42                | unclass. <i>Bacteria</i>            | unclass. <i>Bacteria</i>            | unclass. <i>Bacteria</i>            | unclass. <i>Bacteria</i>       | unclass. <i>Bacteria</i> | <i>Bacteria</i> |
| Otu1289 | 0.2                                       | 0                              | 0.04              | 0.49                  | 0.06                | 69.49                | unclass. <i>Bacteroidetes</i>       | unclass. <i>Bacteroidetes</i>       | unclass. <i>Bacteroidetes</i>       | unclass. <i>Bacteroidetes</i>  | <i>Bacteroidetes</i>     | <i>Bacteria</i> |
| Otu1290 | 0.2                                       | 0                              | 0.04              | 0.49                  | 0.06                | 69.55                | unclass. <i>Bacteria</i>            | unclass. <i>Bacteria</i>            | unclass. <i>Bacteria</i>            | unclass. <i>Bacteria</i>       | unclass. <i>Bacteria</i> | <i>Bacteria</i> |
| Otu1291 | 0.2                                       | 0                              | 0.04              | 0.49                  | 0.06                | 69.61                | unclass. <i>Gammaproteobacteria</i> | unclass. <i>Gammaproteobacteria</i> | unclass. <i>Gammaproteobacteria</i> | <i>Gammaproteobacteria</i>     | <i>Proteobacteria</i>    | <i>Bacteria</i> |
| Otu1292 | 0.2                                       | 0                              | 0.04              | 0.49                  | 0.06                | 69.68                | unclass. <i>Deltaproteobacteria</i> | unclass. <i>Deltaproteobacteria</i> | unclass. <i>Deltaproteobacteria</i> | <i>Deltaproteobacteria</i>     | <i>Proteobacteria</i>    | <i>Bacteria</i> |
| Otu1293 | 0.2                                       | 0                              | 0.04              | 0.49                  | 0.06                | 69.74                | unclass. <i>Bacteroidetes</i>       | unclass. <i>Bacteroidetes</i>       | unclass. <i>Bacteroidetes</i>       | unclass. <i>Bacteroidetes</i>  | <i>Bacteroidetes</i>     | <i>Bacteria</i> |
| Otu1294 | 0.2                                       | 0                              | 0.04              | 0.49                  | 0.06                | 69.8                 | unclass. <i>Bacteria</i>            | unclass. <i>Bacteria</i>            | unclass. <i>Bacteria</i>            | unclass. <i>Bacteria</i>       | unclass. <i>Bacteria</i> | <i>Bacteria</i> |
| Otu1295 | 0.2                                       | 0                              | 0.04              | 0.49                  | 0.06                | 69.87                | unclass. <i>Actinomycetales</i>     | unclass. <i>Actinomycetales</i>     | <i>Actinomycetales</i>              | <i>Actinobacteria</i>          | <i>Actinobacteria</i>    | <i>Bacteria</i> |
| Otu1301 | 0.2                                       | 0                              | 0.04              | 0.49                  | 0.06                | 69.93                | unclass. <i>Alphaproteobacteria</i> | unclass. <i>Alphaproteobacteria</i> | unclass. <i>Alphaproteobacteria</i> | <i>Alphaproteobacteria</i>     | <i>Proteobacteria</i>    | <i>Bacteria</i> |
| Otu1302 | 0.2                                       | 0                              | 0.04              | 0.49                  | 0.06                | 70                   | unclass. <i>Bacteroidetes</i>       | unclass. <i>Bacteroidetes</i>       | unclass. <i>Bacteroidetes</i>       | unclass. <i>Bacteroidetes</i>  | <i>Bacteroidetes</i>     | <i>Bacteria</i> |
| Otu1303 | 0.2                                       | 0                              | 0.04              | 0.49                  | 0.06                | 70.06                | unclass. <i>Acidobacteria_Gp17</i>  | unclass. <i>Acidobacteria_Gp17</i>  | unclass. <i>Acidobacteria_Gp17</i>  | <i>Acidobacteria_Gp17</i>      | <i>Acidobacteria</i>     | <i>Bacteria</i> |
| Otu1305 | 0.2                                       | 0                              | 0.04              | 0.49                  | 0.06                | 70.12                | unclass. <i>Sphingobacteriales</i>  | unclass. <i>Sphingobacteriales</i>  | <i>Sphingobacteriales</i>           | <i>Sphingobacteria</i>         | <i>Bacteroidetes</i>     | <i>Bacteria</i> |

| OTU     | Av.A <sub>i</sub><br>(pH <i>in situ</i> ) | Av.A <sub>i</sub><br>(pH 7.67) | Av.δ <sub>i</sub> | Av.δ <sub>i</sub> /SD | Av.δ <sub>i</sub> % | ΣAv.δ <sub>i</sub> % | Genus                               | Family                              | Order                               | Class                          | Phylum                   | Domain          |
|---------|-------------------------------------------|--------------------------------|-------------------|-----------------------|---------------------|----------------------|-------------------------------------|-------------------------------------|-------------------------------------|--------------------------------|--------------------------|-----------------|
| Otu1306 | 0.2                                       | 0                              | 0.04              | 0.49                  | 0.06                | 70.19                | unclass. <i>Gammaproteobacteria</i> | unclass. <i>Gammaproteobacteria</i> | unclass. <i>Gammaproteobacteria</i> | <i>Gammaproteobacteria</i>     | <i>Proteobacteria</i>    | <i>Bacteria</i> |
| Otu1307 | 0.2                                       | 0                              | 0.04              | 0.49                  | 0.06                | 70.25                | unclass. <i>Gammaproteobacteria</i> | unclass. <i>Gammaproteobacteria</i> | unclass. <i>Gammaproteobacteria</i> | <i>Gammaproteobacteria</i>     | <i>Proteobacteria</i>    | <i>Bacteria</i> |
| Otu1308 | 0.2                                       | 0                              | 0.04              | 0.49                  | 0.06                | 70.32                | unclass. <i>Flavobacteriaceae</i>   | <i>Flavobacteriaceae</i>            | <i>Flavobacteriales</i>             | <i>Flavobacteria</i>           | <i>Bacteroidetes</i>     | <i>Bacteria</i> |
| Otu1309 | 0.2                                       | 0                              | 0.04              | 0.49                  | 0.06                | 70.38                | unclass. <i>Gammaproteobacteria</i> | unclass. <i>Gammaproteobacteria</i> | unclass. <i>Gammaproteobacteria</i> | <i>Gammaproteobacteria</i>     | <i>Proteobacteria</i>    | <i>Bacteria</i> |
| Otu1311 | 0.2                                       | 0                              | 0.04              | 0.49                  | 0.06                | 70.44                | unclass. <i>Rhodobacteraceae</i>    | <i>Rhodobacteraceae</i>             | <i>Rhodobacterales</i>              | <i>Alphaproteobacteria</i>     | <i>Proteobacteria</i>    | <i>Bacteria</i> |
| Otu1312 | 0.2                                       | 0                              | 0.04              | 0.49                  | 0.06                | 70.51                | unclass. <i>Proteobacteria</i>      | unclass. <i>Proteobacteria</i>      | unclass. <i>Proteobacteria</i>      | unclass. <i>Proteobacteria</i> | <i>Proteobacteria</i>    | <i>Bacteria</i> |
| Otu1314 | 0.2                                       | 0                              | 0.04              | 0.49                  | 0.06                | 70.57                | unclass. <i>Acidobacteria_Gp22</i>  | unclass. <i>Acidobacteria_Gp22</i>  | unclass. <i>Acidobacteria_Gp22</i>  | <i>Acidobacteria_Gp22</i>      | <i>Acidobacteria</i>     | <i>Bacteria</i> |
| Otu1316 | 0.2                                       | 0                              | 0.04              | 0.49                  | 0.06                | 70.63                | unclass. <i>Gammaproteobacteria</i> | unclass. <i>Gammaproteobacteria</i> | unclass. <i>Gammaproteobacteria</i> | <i>Gammaproteobacteria</i>     | <i>Proteobacteria</i>    | <i>Bacteria</i> |
| Otu0115 | 0.2                                       | 0                              | 0.04              | 0.49                  | 0.06                | 70.7                 | <i>Glaciecola</i>                   | <i>Alteromonadaceae</i>             | <i>Alteromonadales</i>              | <i>Gammaproteobacteria</i>     | <i>Proteobacteria</i>    | <i>Bacteria</i> |
| Otu0270 | 0.2                                       | 0                              | 0.04              | 0.49                  | 0.06                | 70.76                | unclass. <i>Bacteroidetes</i>       | unclass. <i>Bacteroidetes</i>       | unclass. <i>Bacteroidetes</i>       | unclass. <i>Bacteroidetes</i>  | <i>Bacteroidetes</i>     | <i>Bacteria</i> |
| Otu0303 | 0.2                                       | 0                              | 0.04              | 0.49                  | 0.06                | 70.82                | unclass. <i>Bacteroidetes</i>       | unclass. <i>Bacteroidetes</i>       | unclass. <i>Bacteroidetes</i>       | unclass. <i>Bacteroidetes</i>  | <i>Bacteroidetes</i>     | <i>Bacteria</i> |
| Otu0349 | 0.2                                       | 0                              | 0.04              | 0.49                  | 0.06                | 70.88                | unclass. <i>Gammaproteobacteria</i> | unclass. <i>Gammaproteobacteria</i> | unclass. <i>Gammaproteobacteria</i> | <i>Gammaproteobacteria</i>     | <i>Proteobacteria</i>    | <i>Bacteria</i> |
| Otu0362 | 0.2                                       | 0                              | 0.04              | 0.49                  | 0.06                | 70.94                | unclass. <i>Bacteroidetes</i>       | unclass. <i>Bacteroidetes</i>       | unclass. <i>Bacteroidetes</i>       | unclass. <i>Bacteroidetes</i>  | <i>Bacteroidetes</i>     | <i>Bacteria</i> |
| Otu0367 | 0.2                                       | 0                              | 0.04              | 0.49                  | 0.06                | 71                   | unclass. <i>Bacteroidetes</i>       | unclass. <i>Bacteroidetes</i>       | unclass. <i>Bacteroidetes</i>       | unclass. <i>Bacteroidetes</i>  | <i>Bacteroidetes</i>     | <i>Bacteria</i> |
| Otu0772 | 0.2                                       | 0                              | 0.04              | 0.49                  | 0.06                | 71.06                | unclass. <i>Alphaproteobacteria</i> | unclass. <i>Alphaproteobacteria</i> | unclass. <i>Alphaproteobacteria</i> | <i>Alphaproteobacteria</i>     | <i>Proteobacteria</i>    | <i>Bacteria</i> |
| Otu0808 | 0.2                                       | 0                              | 0.04              | 0.49                  | 0.06                | 71.13                | unclass. <i>Saprospiraceae</i>      | <i>Saprospiraceae</i>               | <i>Sphingobacteriales</i>           | <i>Sphingobacteria</i>         | <i>Bacteroidetes</i>     | <i>Bacteria</i> |
| Otu0933 | 0.2                                       | 0                              | 0.04              | 0.49                  | 0.06                | 71.19                | <i>Haliea</i>                       | <i>Alteromonadaceae</i>             | <i>Alteromonadales</i>              | <i>Gammaproteobacteria</i>     | <i>Proteobacteria</i>    | <i>Bacteria</i> |
| Otu1001 | 0.2                                       | 0                              | 0.04              | 0.49                  | 0.06                | 71.25                | unclass. <i>Flavobacteriales</i>    | unclass. <i>Flavobacteriales</i>    | <i>Flavobacteriales</i>             | <i>Flavobacteria</i>           | <i>Bacteroidetes</i>     | <i>Bacteria</i> |
| Otu1170 | 0.2                                       | 0                              | 0.04              | 0.49                  | 0.06                | 71.31                | unclass. <i>Bacteria</i>            | unclass. <i>Bacteria</i>            | unclass. <i>Bacteria</i>            | unclass. <i>Bacteria</i>       | unclass. <i>Bacteria</i> | <i>Bacteria</i> |
| Otu1318 | 0.2                                       | 0                              | 0.04              | 0.49                  | 0.06                | 71.37                | unclass. <i>Bacteroidetes</i>       | unclass. <i>Bacteroidetes</i>       | unclass. <i>Bacteroidetes</i>       | unclass. <i>Bacteroidetes</i>  | <i>Bacteroidetes</i>     | <i>Bacteria</i> |
| Otu1319 | 0.2                                       | 0                              | 0.04              | 0.49                  | 0.06                | 71.43                | unclass. <i>Gammaproteobacteria</i> | unclass. <i>Gammaproteobacteria</i> | unclass. <i>Gammaproteobacteria</i> | <i>Gammaproteobacteria</i>     | <i>Proteobacteria</i>    | <i>Bacteria</i> |
| Otu1320 | 0.2                                       | 0                              | 0.04              | 0.49                  | 0.06                | 71.49                | unclass. <i>Bacteria</i>            | unclass. <i>Bacteria</i>            | unclass. <i>Bacteria</i>            | unclass. <i>Bacteria</i>       | unclass. <i>Bacteria</i> | <i>Bacteria</i> |
| Otu1321 | 0.2                                       | 0                              | 0.04              | 0.49                  | 0.06                | 71.56                | unclass. <i>Flavobacteriaceae</i>   | <i>Flavobacteriaceae</i>            | <i>Flavobacteriales</i>             | <i>Flavobacteria</i>           | <i>Bacteroidetes</i>     | <i>Bacteria</i> |
| Otu1322 | 0.2                                       | 0                              | 0.04              | 0.49                  | 0.06                | 71.62                | unclass. <i>Bacteria</i>            | unclass. <i>Bacteria</i>            | unclass. <i>Bacteria</i>            | unclass. <i>Bacteria</i>       | unclass. <i>Bacteria</i> | <i>Bacteria</i> |
| Otu1323 | 0.2                                       | 0                              | 0.04              | 0.49                  | 0.06                | 71.68                | unclass. <i>Oceanospirillaceae</i>  | <i>Oceanospirillaceae</i>           | <i>Oceanospirillales</i>            | <i>Gammaproteobacteria</i>     | <i>Proteobacteria</i>    | <i>Bacteria</i> |
| Otu1324 | 0.2                                       | 0                              | 0.04              | 0.49                  | 0.06                | 71.74                | unclass. <i>Alphaproteobacteria</i> | unclass. <i>Alphaproteobacteria</i> | unclass. <i>Alphaproteobacteria</i> | <i>Alphaproteobacteria</i>     | <i>Proteobacteria</i>    | <i>Bacteria</i> |
| Otu1325 | 0.2                                       | 0                              | 0.04              | 0.49                  | 0.06                | 71.8                 | <i>Algibacter</i>                   | <i>Flavobacteriaceae</i>            | <i>Flavobacteriales</i>             | <i>Flavobacteria</i>           | <i>Bacteroidetes</i>     | <i>Bacteria</i> |





| OTU     | Av.A <sub>i</sub><br>(pH <i>in situ</i> ) | Av.A <sub>i</sub><br>(pH 7.67) | Av.δ <sub>i</sub> | Av.δ <sub>i</sub> /SD | Av.δ <sub>i</sub> % | ΣAv.δ <sub>i</sub> % | Genus                               | Family                              | Order                               | Class                           | Phylum                   | Domain          |
|---------|-------------------------------------------|--------------------------------|-------------------|-----------------------|---------------------|----------------------|-------------------------------------|-------------------------------------|-------------------------------------|---------------------------------|--------------------------|-----------------|
| Otu1313 | 0                                         | 0.2                            | 0.04              | 0.49                  | 0.06                | 73.52                | unclass. <i>Saprospiraceae</i>      | <i>Saprospiraceae</i>               | <i>Sphingobacteriales</i>           | <i>Sphingobacteria</i>          | <i>Bacteroidetes</i>     | <i>Bacteria</i> |
| Otu1407 | 0                                         | 0.2                            | 0.04              | 0.49                  | 0.06                | 73.58                | unclass. <i>Flavobacteriales</i>    | unclass. <i>Flavobacteriales</i>    | <i>Flavobacteriales</i>             | <i>Flavobacteria</i>            | <i>Bacteroidetes</i>     | <i>Bacteria</i> |
| Otu1444 | 0                                         | 0.2                            | 0.04              | 0.49                  | 0.06                | 73.64                | unclass. <i>Bacteria</i>            | unclass. <i>Bacteria</i>            | unclass. <i>Bacteria</i>            | unclass. <i>Bacteria</i>        | unclass. <i>Bacteria</i> | <i>Bacteria</i> |
| Otu1451 | 0                                         | 0.2                            | 0.04              | 0.49                  | 0.06                | 73.7                 | unclass. <i>Proteobacteria</i>      | unclass. <i>Proteobacteria</i>      | unclass. <i>Proteobacteria</i>      | unclass. <i>Proteobacteria</i>  | <i>Proteobacteria</i>    | <i>Bacteria</i> |
| Otu1516 | 0                                         | 0.2                            | 0.04              | 0.49                  | 0.06                | 73.76                | unclass. <i>Sphingobacteriales</i>  | unclass. <i>Sphingobacteriales</i>  | <i>Sphingobacteriales</i>           | <i>Sphingobacteria</i>          | <i>Bacteroidetes</i>     | <i>Bacteria</i> |
| Otu1526 | 0                                         | 0.2                            | 0.04              | 0.49                  | 0.06                | 73.82                | unclass. <i>Flavobacteriaceae</i>   | <i>Flavobacteriaceae</i>            | <i>Flavobacteriales</i>             | <i>Flavobacteria</i>            | <i>Bacteroidetes</i>     | <i>Bacteria</i> |
| Otu1548 | 0                                         | 0.2                            | 0.04              | 0.49                  | 0.06                | 73.88                | unclass. <i>Flavobacteriaceae</i>   | <i>Flavobacteriaceae</i>            | <i>Flavobacteriales</i>             | <i>Flavobacteria</i>            | <i>Bacteroidetes</i>     | <i>Bacteria</i> |
| Otu1606 | 0                                         | 0.2                            | 0.04              | 0.49                  | 0.06                | 73.94                | unclass. <i>Bacteria</i>            | unclass. <i>Bacteria</i>            | unclass. <i>Bacteria</i>            | unclass. <i>Bacteria</i>        | unclass. <i>Bacteria</i> | <i>Bacteria</i> |
| Otu1607 | 0                                         | 0.2                            | 0.04              | 0.49                  | 0.06                | 74                   | unclass. <i>Saprospiraceae</i>      | <i>Saprospiraceae</i>               | <i>Sphingobacteriales</i>           | <i>Sphingobacteria</i>          | <i>Bacteroidetes</i>     | <i>Bacteria</i> |
| Otu1608 | 0                                         | 0.2                            | 0.04              | 0.49                  | 0.06                | 74.06                | unclass. <i>Bacteroidetes</i>       | unclass. <i>Bacteroidetes</i>       | unclass. <i>Bacteroidetes</i>       | unclass. <i>Bacteroidetes</i>   | <i>Bacteroidetes</i>     | <i>Bacteria</i> |
| Otu1609 | 0                                         | 0.2                            | 0.04              | 0.49                  | 0.06                | 74.12                | unclass. <i>Bacteria</i>            | unclass. <i>Bacteria</i>            | unclass. <i>Bacteria</i>            | unclass. <i>Bacteria</i>        | unclass. <i>Bacteria</i> | <i>Bacteria</i> |
| Otu1610 | 0                                         | 0.2                            | 0.04              | 0.49                  | 0.06                | 74.18                | unclass. <i>Gammaproteobacteria</i> | unclass. <i>Gammaproteobacteria</i> | unclass. <i>Gammaproteobacteria</i> | <i>Gammaproteobacteria</i>      | <i>Proteobacteria</i>    | <i>Bacteria</i> |
| Otu1611 | 0                                         | 0.2                            | 0.04              | 0.49                  | 0.06                | 74.25                | unclass. <i>Alphaproteobacteria</i> | unclass. <i>Alphaproteobacteria</i> | unclass. <i>Alphaproteobacteria</i> | <i>Alphaproteobacteria</i>      | <i>Proteobacteria</i>    | <i>Bacteria</i> |
| Otu1612 | 0                                         | 0.2                            | 0.04              | 0.49                  | 0.06                | 74.31                | unclass. <i>Gammaproteobacteria</i> | unclass. <i>Gammaproteobacteria</i> | unclass. <i>Gammaproteobacteria</i> | <i>Gammaproteobacteria</i>      | <i>Proteobacteria</i>    | <i>Bacteria</i> |
| Otu1614 | 0                                         | 0.2                            | 0.04              | 0.49                  | 0.06                | 74.37                | unclass. <i>Bacteria</i>            | unclass. <i>Bacteria</i>            | unclass. <i>Bacteria</i>            | unclass. <i>Bacteria</i>        | unclass. <i>Bacteria</i> | <i>Bacteria</i> |
| Otu1615 | 0                                         | 0.2                            | 0.04              | 0.49                  | 0.06                | 74.43                | <i>Rhodopirellula</i>               | <i>Planctomycetaceae</i>            | <i>Planctomycetales</i>             | <i>Planctomycetacia</i>         | <i>Planctomycetes</i>    | <i>Bacteria</i> |
| Otu1616 | 0                                         | 0.2                            | 0.04              | 0.49                  | 0.06                | 74.49                | <i>Malonomonas</i>                  | <i>Desulfuromonadaceae</i>          | <i>Desulfuromonadales</i>           | <i>Deltaproteobacteria</i>      | <i>Proteobacteria</i>    | <i>Bacteria</i> |
| Otu1618 | 0                                         | 0.2                            | 0.04              | 0.49                  | 0.06                | 74.55                | unclass. <i>Chromatiales</i>        | unclass. <i>Chromatiales</i>        | <i>Chromatiales</i>                 | <i>Gammaproteobacteria</i>      | <i>Proteobacteria</i>    | <i>Bacteria</i> |
| Otu1619 | 0                                         | 0.2                            | 0.04              | 0.49                  | 0.06                | 74.61                | unclass. <i>Gammaproteobacteria</i> | unclass. <i>Gammaproteobacteria</i> | unclass. <i>Gammaproteobacteria</i> | <i>Gammaproteobacteria</i>      | <i>Proteobacteria</i>    | <i>Bacteria</i> |
| Otu1621 | 0                                         | 0.2                            | 0.04              | 0.49                  | 0.06                | 74.67                | unclass. <i>Bacteria</i>            | unclass. <i>Bacteria</i>            | unclass. <i>Bacteria</i>            | unclass. <i>Bacteria</i>        | unclass. <i>Bacteria</i> | <i>Bacteria</i> |
| Otu1622 | 0                                         | 0.2                            | 0.04              | 0.49                  | 0.06                | 74.73                | unclass. <i>Gammaproteobacteria</i> | unclass. <i>Gammaproteobacteria</i> | unclass. <i>Gammaproteobacteria</i> | <i>Gammaproteobacteria</i>      | <i>Proteobacteria</i>    | <i>Bacteria</i> |
| Otu1623 | 0                                         | 0.2                            | 0.04              | 0.49                  | 0.06                | 74.79                | unclass. <i>Verrucomicrobia</i>     | unclass. <i>Verrucomicrobia</i>     | unclass. <i>Verrucomicrobia</i>     | unclass. <i>Verrucomicrobia</i> | <i>Verrucomicrobia</i>   | <i>Bacteria</i> |
| Otu1624 | 0                                         | 0.2                            | 0.04              | 0.49                  | 0.06                | 74.85                | <i>Planctomyces</i>                 | <i>Planctomycetaceae</i>            | <i>Planctomycetales</i>             | <i>Planctomycetacia</i>         | <i>Planctomycetes</i>    | <i>Bacteria</i> |
| Otu1625 | 0                                         | 0.2                            | 0.04              | 0.49                  | 0.06                | 74.91                | unclass. <i>Bacteria</i>            | unclass. <i>Bacteria</i>            | unclass. <i>Bacteria</i>            | unclass. <i>Bacteria</i>        | unclass. <i>Bacteria</i> | <i>Bacteria</i> |
| Otu1626 | 0                                         | 0.2                            | 0.04              | 0.49                  | 0.06                | 74.98                | unclass. <i>Bacteria</i>            | unclass. <i>Bacteria</i>            | unclass. <i>Bacteria</i>            | unclass. <i>Bacteria</i>        | unclass. <i>Bacteria</i> | <i>Bacteria</i> |
| Otu1627 | 0                                         | 0.2                            | 0.04              | 0.49                  | 0.06                | 75.04                | unclass. <i>Gammaproteobacteria</i> | unclass. <i>Gammaproteobacteria</i> | unclass. <i>Gammaproteobacteria</i> | <i>Gammaproteobacteria</i>      | <i>Proteobacteria</i>    | <i>Bacteria</i> |
| Otu1628 | 0                                         | 0.2                            | 0.04              | 0.49                  | 0.06                | 75.1                 | <i>Lentisphaera</i>                 | <i>Lentisphaeraceae</i>             | <i>Lentisphaerales</i>              | <i>Lentisphaeria</i>            | <i>Lentisphaerae</i>     | <i>Bacteria</i> |

| OTU     | Av.A <sub>i</sub><br>(pH <i>in situ</i> ) | Av.A <sub>i</sub><br>(pH 7.67) | Av.δ <sub>i</sub> | Av.δ <sub>i</sub> /SD | Av.δ <sub>i</sub> % | ΣAv.δ <sub>i</sub> % | Genus                               | Family                                | Order                                                                  | Class                          | Phylum                   | Domain          |
|---------|-------------------------------------------|--------------------------------|-------------------|-----------------------|---------------------|----------------------|-------------------------------------|---------------------------------------|------------------------------------------------------------------------|--------------------------------|--------------------------|-----------------|
| Otu1629 | 0                                         | 0.2                            | 0.04              | 0.49                  | 0.06                | 75.16                | unclass. <i>Flammeovirgaceae</i>    | <i>Flammeovirgaceae</i>               | <i>Sphingobacteriales</i>                                              | <i>Sphingobacteria</i>         | <i>Bacteroidetes</i>     | <i>Bacteria</i> |
| Otu1630 | 0                                         | 0.2                            | 0.04              | 0.49                  | 0.06                | 75.22                | unclass. <i>Rhodobacteraceae</i>    | <i>Rhodobacteraceae</i>               | <i>Rhodobacterales</i>                                                 | <i>Alphaproteobacteria</i>     | <i>Proteobacteria</i>    | <i>Bacteria</i> |
| Otu1631 | 0                                         | 0.2                            | 0.04              | 0.49                  | 0.06                | 75.28                | unclass. <i>Actinobacteria</i>      | unclass. <i>Actinobacteria</i>        | unclass. <i>Actinobacteria</i>                                         | <i>Actinobacteria</i>          | <i>Actinobacteria</i>    | <i>Bacteria</i> |
| Otu1632 | 0                                         | 0.2                            | 0.04              | 0.49                  | 0.06                | 75.34                | <i>Reichenbachiella</i>             | <i>Flammeovirgaceae</i>               | <i>Sphingobacteriales</i>                                              | <i>Sphingobacteria</i>         | <i>Bacteroidetes</i>     | <i>Bacteria</i> |
| Otu1633 | 0                                         | 0.2                            | 0.04              | 0.49                  | 0.06                | 75.4                 | unclass. <i>Bacteroidetes</i>       | unclass. <i>Bacteroidetes</i>         | unclass. <i>Bacteroidetes</i>                                          | unclass. <i>Bacteroidetes</i>  | <i>Bacteroidetes</i>     | <i>Bacteria</i> |
| Otu1634 | 0                                         | 0.2                            | 0.04              | 0.49                  | 0.06                | 75.46                | unclass. <i>Flavobacteriales</i>    | unclass. <i>Flavobacteriales</i>      | <i>Flavobacteriales</i>                                                | <i>Flavobacteria</i>           | <i>Bacteroidetes</i>     | <i>Bacteria</i> |
| Otu1635 | 0                                         | 0.2                            | 0.04              | 0.49                  | 0.06                | 75.52                | unclass. <i>Bacteria</i>            | unclass. <i>Bacteria</i>              | unclass. <i>Bacteria</i>                                               | unclass. <i>Bacteria</i>       | unclass. <i>Bacteria</i> | <i>Bacteria</i> |
| Otu1636 | 0                                         | 0.2                            | 0.04              | 0.49                  | 0.06                | 75.58                | unclass. <i>Flavobacteriales</i>    | unclass. <i>Flavobacteriales</i>      | <i>Flavobacteriales</i>                                                | <i>Flavobacteria</i>           | <i>Bacteroidetes</i>     | <i>Bacteria</i> |
| Otu1638 | 0                                         | 0.2                            | 0.04              | 0.49                  | 0.06                | 75.65                | unclass. <i>Bacteria</i>            | unclass. <i>Bacteria</i>              | unclass. <i>Bacteria</i>                                               | unclass. <i>Bacteria</i>       | unclass. <i>Bacteria</i> | <i>Bacteria</i> |
| Otu1639 | 0                                         | 0.2                            | 0.04              | 0.49                  | 0.06                | 75.71                | <i>Ilumatobacter</i>                | <i>Acidimicrobidae_incertae_sedis</i> | unclass. <i>Bacteria</i><br><i>Actinobacteria_order_incertae_sedis</i> | <i>Actinobacteria</i>          | <i>Actinobacteria</i>    | <i>Bacteria</i> |
| Otu1640 | 0                                         | 0.2                            | 0.04              | 0.49                  | 0.06                | 75.77                | unclass. <i>Alphaproteobacteria</i> | unclass. <i>Alphaproteobacteria</i>   | unclass. <i>Alphaproteobacteria</i>                                    | <i>Alphaproteobacteria</i>     | <i>Proteobacteria</i>    | <i>Bacteria</i> |
| Otu1641 | 0                                         | 0.2                            | 0.04              | 0.49                  | 0.06                | 75.83                | unclass. <i>Acidobacteria_Gp6</i>   | unclass. <i>Acidobacteria_Gp6</i>     | unclass. <i>Acidobacteria_Gp6</i>                                      | <i>Acidobacteria_Gp6</i>       | <i>Acidobacteria</i>     | <i>Bacteria</i> |
| Otu1642 | 0                                         | 0.2                            | 0.04              | 0.49                  | 0.06                | 75.89                | unclass. <i>Verrucomicrobiaceae</i> | <i>Verrucomicrobiaceae</i>            | <i>Verrucomicrobiales</i>                                              | <i>Verrucomicrobiae</i>        | <i>Verrucomicrobia</i>   | <i>Bacteria</i> |
| Otu1643 | 0                                         | 0.2                            | 0.04              | 0.49                  | 0.06                | 75.95                | unclass. <i>Deltaproteobacteria</i> | unclass. <i>Deltaproteobacteria</i>   | unclass. <i>Deltaproteobacteria</i>                                    | <i>Deltaproteobacteria</i>     | <i>Proteobacteria</i>    | <i>Bacteria</i> |
| Otu1644 | 0                                         | 0.2                            | 0.04              | 0.49                  | 0.06                | 76.01                | unclass. <i>Proteobacteria</i>      | unclass. <i>Proteobacteria</i>        | unclass. <i>Proteobacteria</i>                                         | unclass. <i>Proteobacteria</i> | <i>Proteobacteria</i>    | <i>Bacteria</i> |
| Otu1645 | 0                                         | 0.2                            | 0.04              | 0.49                  | 0.06                | 76.07                | <i>Thalassomonas</i>                | <i>Colwelliaceae</i>                  | <i>Alteromonadales</i>                                                 | <i>Gammaproteobacteria</i>     | <i>Proteobacteria</i>    | <i>Bacteria</i> |
| Otu1646 | 0                                         | 0.2                            | 0.04              | 0.49                  | 0.06                | 76.13                | unclass. <i>Flavobacteriaceae</i>   | <i>Flavobacteriaceae</i>              | <i>Flavobacteriales</i>                                                | <i>Flavobacteria</i>           | <i>Bacteroidetes</i>     | <i>Bacteria</i> |
| Otu1647 | 0                                         | 0.2                            | 0.04              | 0.49                  | 0.06                | 76.19                | unclass. <i>Desulfobulbaceae</i>    | <i>Desulfobulbaceae</i>               | <i>Desulfobacterales</i>                                               | <i>Deltaproteobacteria</i>     | <i>Proteobacteria</i>    | <i>Bacteria</i> |
| Otu1648 | 0                                         | 0.2                            | 0.04              | 0.49                  | 0.06                | 76.25                | unclass. <i>Alphaproteobacteria</i> | unclass. <i>Alphaproteobacteria</i>   | unclass. <i>Alphaproteobacteria</i>                                    | <i>Alphaproteobacteria</i>     | <i>Proteobacteria</i>    | <i>Bacteria</i> |
| Otu1649 | 0                                         | 0.2                            | 0.04              | 0.49                  | 0.06                | 76.31                | unclass. <i>Bacteroidetes</i>       | unclass. <i>Bacteroidetes</i>         | unclass. <i>Bacteroidetes</i>                                          | unclass. <i>Bacteroidetes</i>  | <i>Bacteroidetes</i>     | <i>Bacteria</i> |
| Otu0033 | 0                                         | 0.2                            | 0.04              | 0.49                  | 0.06                | 76.38                | unclass. <i>Erythrobacteraceae</i>  | <i>Erythrobacteraceae</i>             | <i>Sphingomonadales</i>                                                | <i>Alphaproteobacteria</i>     | <i>Proteobacteria</i>    | <i>Bacteria</i> |
| Otu0132 | 0                                         | 0.2                            | 0.04              | 0.49                  | 0.06                | 76.44                | unclass. <i>Alteromonadales</i>     | unclass. <i>Alteromonadales</i>       | <i>Alteromonadales</i>                                                 | <i>Gammaproteobacteria</i>     | <i>Proteobacteria</i>    | <i>Bacteria</i> |
| Otu0232 | 0                                         | 0.2                            | 0.04              | 0.49                  | 0.06                | 76.5                 | unclass. <i>Rhodobacteraceae</i>    | <i>Rhodobacteraceae</i>               | <i>Rhodobacterales</i>                                                 | <i>Alphaproteobacteria</i>     | <i>Proteobacteria</i>    | <i>Bacteria</i> |
| Otu0251 | 0                                         | 0.2                            | 0.04              | 0.49                  | 0.06                | 76.56                | unclass. <i>Bacteroidetes</i>       | unclass. <i>Bacteroidetes</i>         | unclass. <i>Bacteroidetes</i>                                          | unclass. <i>Bacteroidetes</i>  | <i>Bacteroidetes</i>     | <i>Bacteria</i> |
| Otu0276 | 0                                         | 0.2                            | 0.04              | 0.49                  | 0.06                | 76.62                | unclass. <i>Gammaproteobacteria</i> | unclass. <i>Gammaproteobacteria</i>   | unclass. <i>Gammaproteobacteria</i>                                    | <i>Gammaproteobacteria</i>     | <i>Proteobacteria</i>    | <i>Bacteria</i> |
| Otu0334 | 0                                         | 0.2                            | 0.04              | 0.49                  | 0.06                | 76.68                | unclass. <i>Flavobacteriaceae</i>   | <i>Flavobacteriaceae</i>              | <i>Flavobacteriales</i>                                                | <i>Flavobacteria</i>           | <i>Bacteroidetes</i>     | <i>Bacteria</i> |
| Otu0721 | 0                                         | 0.2                            | 0.04              | 0.49                  | 0.06                | 76.74                | unclass. <i>Alphaproteobacteria</i> | unclass. <i>Alphaproteobacteria</i>   | unclass. <i>Alphaproteobacteria</i>                                    | <i>Alphaproteobacteria</i>     | <i>Proteobacteria</i>    | <i>Bacteria</i> |

| OTU     | Av.A <sub>i</sub><br>(pH <i>in situ</i> ) | Av.A <sub>i</sub><br>(pH 7.67) | Av.δ <sub>i</sub> | Av.δ <sub>i</sub> /SD | Av.δ <sub>i</sub> % | ΣAv.δ <sub>i</sub> % | Genus                               | Family                              | Order                               | Class                          | Phylum                   | Domain          |
|---------|-------------------------------------------|--------------------------------|-------------------|-----------------------|---------------------|----------------------|-------------------------------------|-------------------------------------|-------------------------------------|--------------------------------|--------------------------|-----------------|
| Otu0798 | 0                                         | 0.2                            | 0.04              | 0.49                  | 0.06                | 76.8                 | unclass. <i>Gammaproteobacteria</i> | unclass. <i>Gammaproteobacteria</i> | unclass. <i>Gammaproteobacteria</i> | <i>Gammaproteobacteria</i>     | <i>Proteobacteria</i>    | <i>Bacteria</i> |
| Otu0818 | 0                                         | 0.2                            | 0.04              | 0.49                  | 0.06                | 76.86                | unclass. <i>Planctomycetaceae</i>   | <i>Planctomycetaceae</i>            | <i>Planctomycetales</i>             | <i>Planctomycetacia</i>        | <i>Planctomycetes</i>    | <i>Bacteria</i> |
| Otu0827 | 0                                         | 0.2                            | 0.04              | 0.49                  | 0.06                | 76.92                | unclass. <i>Bacteria</i>            | unclass. <i>Bacteria</i>            | unclass. <i>Bacteria</i>            | unclass. <i>Bacteria</i>       | unclass. <i>Bacteria</i> | <i>Bacteria</i> |
| Otu0836 | 0                                         | 0.2                            | 0.04              | 0.49                  | 0.06                | 76.98                | <i>Haliea</i>                       | <i>Alteromonadaceae</i>             | <i>Alteromonadales</i>              | <i>Gammaproteobacteria</i>     | <i>Proteobacteria</i>    | <i>Bacteria</i> |
| Otu0847 | 0                                         | 0.2                            | 0.04              | 0.49                  | 0.06                | 77.04                | unclass. <i>Alphaproteobacteria</i> | unclass. <i>Alphaproteobacteria</i> | unclass. <i>Alphaproteobacteria</i> | <i>Alphaproteobacteria</i>     | <i>Proteobacteria</i>    | <i>Bacteria</i> |
| Otu0860 | 0                                         | 0.2                            | 0.04              | 0.49                  | 0.06                | 77.1                 | unclass. <i>Planctomycetaceae</i>   | <i>Planctomycetaceae</i>            | <i>Planctomycetales</i>             | <i>Planctomycetacia</i>        | <i>Planctomycetes</i>    | <i>Bacteria</i> |
| Otu1040 | 0                                         | 0.2                            | 0.04              | 0.49                  | 0.06                | 77.16                | unclass. <i>Gammaproteobacteria</i> | unclass. <i>Gammaproteobacteria</i> | unclass. <i>Gammaproteobacteria</i> | <i>Gammaproteobacteria</i>     | <i>Proteobacteria</i>    | <i>Bacteria</i> |
| Otu1044 | 0                                         | 0.2                            | 0.04              | 0.49                  | 0.06                | 77.22                | unclass. <i>WS3</i>                 | unclass. <i>WS3</i>                 | unclass. <i>WS3</i>                 | unclass. <i>WS3</i>            | <i>WS3</i>               | <i>Bacteria</i> |
| Otu1159 | 0                                         | 0.2                            | 0.04              | 0.49                  | 0.06                | 77.28                | unclass. <i>Gammaproteobacteria</i> | unclass. <i>Gammaproteobacteria</i> | unclass. <i>Gammaproteobacteria</i> | <i>Gammaproteobacteria</i>     | <i>Proteobacteria</i>    | <i>Bacteria</i> |
| Otu1179 | 0                                         | 0.2                            | 0.04              | 0.49                  | 0.06                | 77.34                | unclass. <i>Planctomycetaceae</i>   | <i>Planctomycetaceae</i>            | <i>Planctomycetales</i>             | <i>Planctomycetacia</i>        | <i>Planctomycetes</i>    | <i>Bacteria</i> |
| Otu1226 | 0                                         | 0.2                            | 0.04              | 0.49                  | 0.06                | 77.4                 | <i>Planctomyces</i>                 | <i>Planctomycetaceae</i>            | <i>Planctomycetales</i>             | <i>Planctomycetacia</i>        | <i>Planctomycetes</i>    | <i>Bacteria</i> |
| Otu1402 | 0                                         | 0.2                            | 0.04              | 0.49                  | 0.06                | 77.47                | unclass. <i>Rhodobacteraceae</i>    | <i>Rhodobacteraceae</i>             | <i>Rhodobacterales</i>              | <i>Alphaproteobacteria</i>     | <i>Proteobacteria</i>    | <i>Bacteria</i> |
| Otu1419 | 0                                         | 0.2                            | 0.04              | 0.49                  | 0.06                | 77.53                | unclass. <i>Bacteria</i>            | unclass. <i>Bacteria</i>            | unclass. <i>Bacteria</i>            | unclass. <i>Bacteria</i>       | unclass. <i>Bacteria</i> | <i>Bacteria</i> |
| Otu1420 | 0                                         | 0.2                            | 0.04              | 0.49                  | 0.06                | 77.59                | unclass. <i>Gammaproteobacteria</i> | unclass. <i>Gammaproteobacteria</i> | unclass. <i>Gammaproteobacteria</i> | <i>Gammaproteobacteria</i>     | <i>Proteobacteria</i>    | <i>Bacteria</i> |
| Otu1423 | 0                                         | 0.2                            | 0.04              | 0.49                  | 0.06                | 77.65                | <i>Sphingobium</i>                  | <i>Sphingomonadaceae</i>            | <i>Sphingomonadales</i>             | <i>Alphaproteobacteria</i>     | <i>Proteobacteria</i>    | <i>Bacteria</i> |
| Otu1425 | 0                                         | 0.2                            | 0.04              | 0.49                  | 0.06                | 77.71                | unclass. <i>Verrucomicrobiaceae</i> | <i>Verrucomicrobiaceae</i>          | <i>Verrucomicrobiales</i>           | <i>Verrucomicrobiae</i>        | <i>Verrucomicrobia</i>   | <i>Bacteria</i> |
| Otu1426 | 0                                         | 0.2                            | 0.04              | 0.49                  | 0.06                | 77.77                | unclass. <i>Anaerolineaceae</i>     | <i>Anaerolineaceae</i>              | <i>Anaerolineales</i>               | <i>Anaerolineae</i>            | <i>Chloroflexi</i>       | <i>Bacteria</i> |
| Otu1427 | 0                                         | 0.2                            | 0.04              | 0.49                  | 0.06                | 77.83                | unclass. <i>Gammaproteobacteria</i> | unclass. <i>Gammaproteobacteria</i> | unclass. <i>Gammaproteobacteria</i> | <i>Gammaproteobacteria</i>     | <i>Proteobacteria</i>    | <i>Bacteria</i> |
| Otu1428 | 0                                         | 0.2                            | 0.04              | 0.49                  | 0.06                | 77.89                | unclass. <i>Bacteria</i>            | unclass. <i>Bacteria</i>            | unclass. <i>Bacteria</i>            | unclass. <i>Bacteria</i>       | unclass. <i>Bacteria</i> | <i>Bacteria</i> |
| Otu1429 | 0                                         | 0.2                            | 0.04              | 0.49                  | 0.06                | 77.95                | unclass. <i>Gammaproteobacteria</i> | unclass. <i>Gammaproteobacteria</i> | unclass. <i>Gammaproteobacteria</i> | <i>Gammaproteobacteria</i>     | <i>Proteobacteria</i>    | <i>Bacteria</i> |
| Otu1431 | 0                                         | 0.2                            | 0.04              | 0.49                  | 0.06                | 78.01                | unclass. <i>Flavobacteriaceae</i>   | <i>Flavobacteriaceae</i>            | <i>Flavobacteriales</i>             | <i>Flavobacteria</i>           | <i>Bacteroidetes</i>     | <i>Bacteria</i> |
| Otu1434 | 0                                         | 0.2                            | 0.04              | 0.49                  | 0.06                | 78.07                | unclass. <i>Proteobacteria</i>      | unclass. <i>Proteobacteria</i>      | unclass. <i>Proteobacteria</i>      | unclass. <i>Proteobacteria</i> | <i>Proteobacteria</i>    | <i>Bacteria</i> |
| Otu1436 | 0                                         | 0.2                            | 0.04              | 0.49                  | 0.06                | 78.13                | unclass. <i>Gammaproteobacteria</i> | unclass. <i>Gammaproteobacteria</i> | unclass. <i>Gammaproteobacteria</i> | <i>Gammaproteobacteria</i>     | <i>Proteobacteria</i>    | <i>Bacteria</i> |
| Otu1437 | 0                                         | 0.2                            | 0.04              | 0.49                  | 0.06                | 78.19                | unclass. <i>Deltaproteobacteria</i> | unclass. <i>Deltaproteobacteria</i> | unclass. <i>Deltaproteobacteria</i> | <i>Deltaproteobacteria</i>     | <i>Proteobacteria</i>    | <i>Bacteria</i> |
| Otu1438 | 0                                         | 0.2                            | 0.04              | 0.49                  | 0.06                | 78.25                | unclass. <i>Bacteroidetes</i>       | unclass. <i>Bacteroidetes</i>       | unclass. <i>Bacteroidetes</i>       | unclass. <i>Bacteroidetes</i>  | <i>Bacteroidetes</i>     | <i>Bacteria</i> |
| Otu1440 | 0                                         | 0.2                            | 0.04              | 0.49                  | 0.06                | 78.31                | unclass. <i>Actinobacteria</i>      | unclass. <i>Actinobacteria</i>      | unclass. <i>Actinobacteria</i>      | <i>Actinobacteria</i>          | <i>Actinobacteria</i>    | <i>Bacteria</i> |
| Otu1443 | 0                                         | 0.2                            | 0.04              | 0.49                  | 0.06                | 78.37                | unclass. <i>Bacteria</i>            | unclass. <i>Bacteria</i>            | unclass. <i>Bacteria</i>            | unclass. <i>Bacteria</i>       | unclass. <i>Bacteria</i> | <i>Bacteria</i> |

| OTU     | Av.A <sub>i</sub><br>(pH <i>in situ</i> ) | Av.A <sub>i</sub><br>(pH 7.67) | Av.δ <sub>i</sub> | Av.δ <sub>i</sub> /SD | Av.δ <sub>i</sub> % | ΣAv.δ <sub>i</sub> % | Genus                               | Family                              | Order                               | Class                           | Phylum                   | Domain          |
|---------|-------------------------------------------|--------------------------------|-------------------|-----------------------|---------------------|----------------------|-------------------------------------|-------------------------------------|-------------------------------------|---------------------------------|--------------------------|-----------------|
| Otu1445 | 0                                         | 0.2                            | 0.04              | 0.49                  | 0.06                | 78.43                | unclass. <i>Rhizobiales</i>         | unclass. <i>Rhizobiales</i>         | <i>Rhizobiales</i>                  | <i>Alphaproteobacteria</i>      | <i>Proteobacteria</i>    | <i>Bacteria</i> |
| Otu1446 | 0                                         | 0.2                            | 0.04              | 0.49                  | 0.06                | 78.5                 | unclass. <i>Flavobacteriaceae</i>   | <i>Flavobacteriaceae</i>            | <i>Flavobacteriales</i>             | <i>Flavobacteria</i>            | <i>Bacteroidetes</i>     | <i>Bacteria</i> |
| Otu1447 | 0                                         | 0.2                            | 0.04              | 0.49                  | 0.06                | 78.56                | unclass. <i>Sphingomonadales</i>    | unclass. <i>Sphingomonadales</i>    | <i>Sphingomonadales</i>             | <i>Alphaproteobacteria</i>      | <i>Proteobacteria</i>    | <i>Bacteria</i> |
| Otu1448 | 0                                         | 0.2                            | 0.04              | 0.49                  | 0.06                | 78.62                | unclass. <i>Bacteria</i>            | unclass. <i>Bacteria</i>            | unclass. <i>Bacteria</i>            | unclass. <i>Bacteria</i>        | unclass. <i>Bacteria</i> | <i>Bacteria</i> |
| Otu1450 | 0                                         | 0.2                            | 0.04              | 0.49                  | 0.06                | 78.68                | unclass. <i>Bacteria</i>            | unclass. <i>Bacteria</i>            | unclass. <i>Bacteria</i>            | unclass. <i>Bacteria</i>        | unclass. <i>Bacteria</i> | <i>Bacteria</i> |
| Otu1452 | 0                                         | 0.2                            | 0.04              | 0.49                  | 0.06                | 78.74                | <i>Planctomyces</i>                 | <i>Planctomycetaceae</i>            | <i>Planctomycetales</i>             | <i>Planctomycetacia</i>         | <i>Planctomycetes</i>    | <i>Bacteria</i> |
| Otu1453 | 0                                         | 0.2                            | 0.04              | 0.49                  | 0.06                | 78.8                 | unclass. <i>Alphaproteobacteria</i> | unclass. <i>Alphaproteobacteria</i> | unclass. <i>Alphaproteobacteria</i> | <i>Alphaproteobacteria</i>      | <i>Proteobacteria</i>    | <i>Bacteria</i> |
| Otu1454 | 0                                         | 0.2                            | 0.04              | 0.49                  | 0.06                | 78.86                | unclass. <i>Bacteroidetes</i>       | unclass. <i>Bacteroidetes</i>       | unclass. <i>Bacteroidetes</i>       | unclass. <i>Bacteroidetes</i>   | <i>Bacteroidetes</i>     | <i>Bacteria</i> |
| Otu1456 | 0                                         | 0.2                            | 0.04              | 0.49                  | 0.06                | 78.92                | unclass. <i>Rhodobacteraceae</i>    | <i>Rhodobacteraceae</i>             | <i>Rhodobacterales</i>              | <i>Alphaproteobacteria</i>      | <i>Proteobacteria</i>    | <i>Bacteria</i> |
| Otu1457 | 0                                         | 0.2                            | 0.04              | 0.49                  | 0.06                | 78.98                | unclass. <i>Proteobacteria</i>      | unclass. <i>Proteobacteria</i>      | unclass. <i>Proteobacteria</i>      | unclass. <i>Proteobacteria</i>  | <i>Proteobacteria</i>    | <i>Bacteria</i> |
| Otu1458 | 0                                         | 0.2                            | 0.04              | 0.49                  | 0.06                | 79.04                | unclass. <i>Gammaproteobacteria</i> | unclass. <i>Gammaproteobacteria</i> | unclass. <i>Gammaproteobacteria</i> | <i>Gammaproteobacteria</i>      | <i>Proteobacteria</i>    | <i>Bacteria</i> |
| Otu1459 | 0                                         | 0.2                            | 0.04              | 0.49                  | 0.06                | 79.1                 | unclass. <i>Alphaproteobacteria</i> | unclass. <i>Alphaproteobacteria</i> | unclass. <i>Alphaproteobacteria</i> | <i>Alphaproteobacteria</i>      | <i>Proteobacteria</i>    | <i>Bacteria</i> |
| Otu1460 | 0                                         | 0.2                            | 0.04              | 0.49                  | 0.06                | 79.16                | unclass. <i>Bacteria</i>            | unclass. <i>Bacteria</i>            | unclass. <i>Bacteria</i>            | unclass. <i>Bacteria</i>        | unclass. <i>Bacteria</i> | <i>Bacteria</i> |
| Otu1461 | 0                                         | 0.2                            | 0.04              | 0.49                  | 0.06                | 79.22                | unclass. <i>Planctomycetaceae</i>   | <i>Planctomycetaceae</i>            | <i>Planctomycetales</i>             | <i>Planctomycetacia</i>         | <i>Planctomycetes</i>    | <i>Bacteria</i> |
| Otu1462 | 0                                         | 0.2                            | 0.04              | 0.49                  | 0.06                | 79.28                | unclass. <i>Proteobacteria</i>      | unclass. <i>Proteobacteria</i>      | unclass. <i>Proteobacteria</i>      | unclass. <i>Proteobacteria</i>  | <i>Proteobacteria</i>    | <i>Bacteria</i> |
| Otu1463 | 0                                         | 0.2                            | 0.04              | 0.49                  | 0.06                | 79.34                | unclass. <i>Bacteria</i>            | unclass. <i>Bacteria</i>            | unclass. <i>Bacteria</i>            | unclass. <i>Bacteria</i>        | unclass. <i>Bacteria</i> | <i>Bacteria</i> |
| Otu1464 | 0                                         | 0.2                            | 0.04              | 0.49                  | 0.06                | 79.4                 | unclass. <i>Gammaproteobacteria</i> | unclass. <i>Gammaproteobacteria</i> | unclass. <i>Gammaproteobacteria</i> | <i>Gammaproteobacteria</i>      | <i>Proteobacteria</i>    | <i>Bacteria</i> |
| Otu1465 | 0                                         | 0.2                            | 0.04              | 0.49                  | 0.06                | 79.46                | <i>Cellulophaga</i>                 | <i>Flavobacteriaceae</i>            | <i>Flavobacteriales</i>             | <i>Flavobacteria</i>            | <i>Bacteroidetes</i>     | <i>Bacteria</i> |
| Otu1467 | 0                                         | 0.2                            | 0.04              | 0.49                  | 0.06                | 79.53                | unclass. <i>Bacteria</i>            | unclass. <i>Bacteria</i>            | unclass. <i>Bacteria</i>            | unclass. <i>Bacteria</i>        | unclass. <i>Bacteria</i> | <i>Bacteria</i> |
| Otu1468 | 0                                         | 0.2                            | 0.04              | 0.49                  | 0.06                | 79.59                | unclass. <i>Bacteria</i>            | unclass. <i>Bacteria</i>            | unclass. <i>Bacteria</i>            | unclass. <i>Bacteria</i>        | unclass. <i>Bacteria</i> | <i>Bacteria</i> |
| Otu1469 | 0                                         | 0.2                            | 0.04              | 0.49                  | 0.06                | 79.65                | unclass. <i>Rhodospirillaceae</i>   | <i>Rhodospirillaceae</i>            | <i>Rhodospirillales</i>             | <i>Alphaproteobacteria</i>      | <i>Proteobacteria</i>    | <i>Bacteria</i> |
| Otu1471 | 0                                         | 0.2                            | 0.04              | 0.49                  | 0.06                | 79.71                | unclass. <i>Bacteria</i>            | unclass. <i>Bacteria</i>            | unclass. <i>Bacteria</i>            | unclass. <i>Bacteria</i>        | unclass. <i>Bacteria</i> | <i>Bacteria</i> |
| Otu1472 | 0                                         | 0.2                            | 0.04              | 0.49                  | 0.06                | 79.77                | unclass. <i>Planctomycetaceae</i>   | <i>Planctomycetaceae</i>            | <i>Planctomycetales</i>             | <i>Planctomycetacia</i>         | <i>Planctomycetes</i>    | <i>Bacteria</i> |
| Otu1473 | 0                                         | 0.2                            | 0.04              | 0.49                  | 0.06                | 79.83                | unclass. <i>Rhodobacteraceae</i>    | <i>Rhodobacteraceae</i>             | <i>Rhodobacterales</i>              | <i>Alphaproteobacteria</i>      | <i>Proteobacteria</i>    | <i>Bacteria</i> |
| Otu1474 | 0                                         | 0.2                            | 0.04              | 0.49                  | 0.06                | 79.89                | unclass. <i>Verrucomicrobia</i>     | unclass. <i>Verrucomicrobia</i>     | unclass. <i>Verrucomicrobia</i>     | unclass. <i>Verrucomicrobia</i> | <i>Verrucomicrobia</i>   | <i>Bacteria</i> |
| Otu1475 | 0                                         | 0.2                            | 0.04              | 0.49                  | 0.06                | 79.95                | unclass. <i>Bacteria</i>            | unclass. <i>Bacteria</i>            | unclass. <i>Bacteria</i>            | unclass. <i>Bacteria</i>        | unclass. <i>Bacteria</i> | <i>Bacteria</i> |
| Otu1477 | 0                                         | 0.2                            | 0.04              | 0.49                  | 0.06                | 80.01                | unclass. <i>Legionellaceae</i>      | <i>Legionellaceae</i>               | <i>Legionellales</i>                | <i>Gammaproteobacteria</i>      | <i>Proteobacteria</i>    | <i>Bacteria</i> |

| OTU     | Av.A <sub>i</sub><br>(pH <i>in situ</i> ) | Av.A <sub>i</sub><br>(pH 7.67) | Av.δ <sub>i</sub> | Av.δ <sub>i</sub> /SD | Av.δ <sub>i</sub> % | ΣAv.δ <sub>i</sub> % | Genus                               | Family                              | Order                               | Class                          | Phylum                   | Domain          |
|---------|-------------------------------------------|--------------------------------|-------------------|-----------------------|---------------------|----------------------|-------------------------------------|-------------------------------------|-------------------------------------|--------------------------------|--------------------------|-----------------|
| Otu1478 | 0                                         | 0.2                            | 0.04              | 0.49                  | 0.06                | 80.07                | unclass. <i>Bacteria</i>            | unclass. <i>Bacteria</i>            | unclass. <i>Bacteria</i>            | unclass. <i>Bacteria</i>       | unclass. <i>Bacteria</i> | <i>Bacteria</i> |
| Otu1480 | 0                                         | 0.2                            | 0.04              | 0.49                  | 0.06                | 80.13                | unclass. <i>Flavobacteriaceae</i>   | <i>Flavobacteriaceae</i>            | <i>Flavobacteriales</i>             | <i>Flavobacteria</i>           | <i>Bacteroidetes</i>     | <i>Bacteria</i> |
| Otu1484 | 0                                         | 0.2                            | 0.04              | 0.49                  | 0.06                | 80.19                | unclass. <i>Deltaproteobacteria</i> | unclass. <i>Deltaproteobacteria</i> | unclass. <i>Deltaproteobacteria</i> | <i>Deltaproteobacteria</i>     | <i>Proteobacteria</i>    | <i>Bacteria</i> |
| Otu0061 | 0                                         | 0.2                            | 0.04              | 0.49                  | 0.06                | 80.25                | unclass. <i>Actinomycetales</i>     | unclass. <i>Actinomycetales</i>     | <i>Actinomycetales</i>              | <i>Actinobacteria</i>          | <i>Actinobacteria</i>    | <i>Bacteria</i> |
| Otu0201 | 0                                         | 0.2                            | 0.04              | 0.49                  | 0.06                | 80.31                | unclass. <i>Alphaproteobacteria</i> | unclass. <i>Alphaproteobacteria</i> | unclass. <i>Alphaproteobacteria</i> | <i>Alphaproteobacteria</i>     | <i>Proteobacteria</i>    | <i>Bacteria</i> |
| Otu0240 | 0                                         | 0.2                            | 0.04              | 0.49                  | 0.06                | 80.37                | unclass. <i>Chromatiales</i>        | unclass. <i>Chromatiales</i>        | <i>Chromatiales</i>                 | <i>Gammaproteobacteria</i>     | <i>Proteobacteria</i>    | <i>Bacteria</i> |
| Otu0245 | 0                                         | 0.2                            | 0.04              | 0.49                  | 0.06                | 80.43                | unclass. <i>Flavobacteriales</i>    | unclass. <i>Flavobacteriales</i>    | <i>Flavobacteriales</i>             | <i>Flavobacteria</i>           | <i>Bacteroidetes</i>     | <i>Bacteria</i> |
| Otu0260 | 0                                         | 0.2                            | 0.04              | 0.49                  | 0.06                | 80.49                | unclass. <i>Gammaproteobacteria</i> | unclass. <i>Gammaproteobacteria</i> | unclass. <i>Gammaproteobacteria</i> | <i>Gammaproteobacteria</i>     | <i>Proteobacteria</i>    | <i>Bacteria</i> |
| Otu0357 | 0                                         | 0.2                            | 0.04              | 0.49                  | 0.06                | 80.55                | <i>Sphingopyxis</i>                 | <i>Sphingomonadaceae</i>            | <i>Sphingomonadales</i>             | <i>Alphaproteobacteria</i>     | <i>Proteobacteria</i>    | <i>Bacteria</i> |
| Otu0413 | 0                                         | 0.2                            | 0.04              | 0.49                  | 0.06                | 80.61                | <i>Eudoraea</i>                     | <i>Flavobacteriaceae</i>            | <i>Flavobacteriales</i>             | <i>Flavobacteria</i>           | <i>Bacteroidetes</i>     | <i>Bacteria</i> |
| Otu0462 | 0                                         | 0.2                            | 0.04              | 0.49                  | 0.06                | 80.67                | <i>Haliea</i>                       | <i>Alteromonadaceae</i>             | <i>Alteromonadales</i>              | <i>Gammaproteobacteria</i>     | <i>Proteobacteria</i>    | <i>Bacteria</i> |
| Otu0618 | 0                                         | 0.2                            | 0.04              | 0.49                  | 0.06                | 80.73                | <i>Glaciecola</i>                   | <i>Alteromonadaceae</i>             | <i>Alteromonadales</i>              | <i>Gammaproteobacteria</i>     | <i>Proteobacteria</i>    | <i>Bacteria</i> |
| Otu0769 | 0                                         | 0.2                            | 0.04              | 0.49                  | 0.06                | 80.79                | unclass. <i>Bacteroidetes</i>       | unclass. <i>Bacteroidetes</i>       | unclass. <i>Bacteroidetes</i>       | unclass. <i>Bacteroidetes</i>  | <i>Bacteroidetes</i>     | <i>Bacteria</i> |
| Otu0866 | 0                                         | 0.2                            | 0.04              | 0.49                  | 0.06                | 80.85                | <i>Thalassomonas</i>                | <i>Colwelliaceae</i>                | <i>Alteromonadales</i>              | <i>Gammaproteobacteria</i>     | <i>Proteobacteria</i>    | <i>Bacteria</i> |
| Otu0930 | 0                                         | 0.2                            | 0.04              | 0.49                  | 0.06                | 80.91                | unclass. <i>Rickettsiaceae</i>      | <i>Rickettsiaceae</i>               | <i>Rickettsiales</i>                | <i>Alphaproteobacteria</i>     | <i>Proteobacteria</i>    | <i>Bacteria</i> |
| Otu1060 | 0                                         | 0.2                            | 0.04              | 0.49                  | 0.06                | 80.97                | unclass. <i>Rhodobacteraceae</i>    | <i>Rhodobacteraceae</i>             | <i>Rhodobacterales</i>              | <i>Alphaproteobacteria</i>     | <i>Proteobacteria</i>    | <i>Bacteria</i> |
| Otu1067 | 0                                         | 0.2                            | 0.04              | 0.49                  | 0.06                | 81.03                | unclass. <i>Rhodobacteraceae</i>    | <i>Rhodobacteraceae</i>             | <i>Rhodobacterales</i>              | <i>Alphaproteobacteria</i>     | <i>Proteobacteria</i>    | <i>Bacteria</i> |
| Otu1123 | 0                                         | 0.2                            | 0.04              | 0.49                  | 0.06                | 81.09                | unclass. <i>Proteobacteria</i>      | unclass. <i>Proteobacteria</i>      | unclass. <i>Proteobacteria</i>      | unclass. <i>Proteobacteria</i> | <i>Proteobacteria</i>    | <i>Bacteria</i> |
| Otu1255 | 0                                         | 0.2                            | 0.04              | 0.49                  | 0.06                | 81.15                | unclass. <i>Bacteria</i>            | unclass. <i>Bacteria</i>            | unclass. <i>Bacteria</i>            | unclass. <i>Bacteria</i>       | unclass. <i>Bacteria</i> | <i>Bacteria</i> |
| Otu1297 | 0                                         | 0.2                            | 0.04              | 0.49                  | 0.06                | 81.21                | unclass. <i>Alphaproteobacteria</i> | unclass. <i>Alphaproteobacteria</i> | unclass. <i>Alphaproteobacteria</i> | <i>Alphaproteobacteria</i>     | <i>Proteobacteria</i>    | <i>Bacteria</i> |
| Otu1479 | 0                                         | 0.2                            | 0.04              | 0.49                  | 0.06                | 81.27                | unclass. <i>Gammaproteobacteria</i> | unclass. <i>Gammaproteobacteria</i> | unclass. <i>Gammaproteobacteria</i> | <i>Gammaproteobacteria</i>     | <i>Proteobacteria</i>    | <i>Bacteria</i> |
| Otu1531 | 0                                         | 0.2                            | 0.04              | 0.49                  | 0.06                | 81.33                | unclass. <i>Nannocystaceae</i>      | <i>Nannocystaceae</i>               | <i>Myxococcales</i>                 | <i>Deltaproteobacteria</i>     | <i>Proteobacteria</i>    | <i>Bacteria</i> |
| Otu1539 | 0                                         | 0.2                            | 0.04              | 0.49                  | 0.06                | 81.39                | unclass. <i>Proteobacteria</i>      | unclass. <i>Proteobacteria</i>      | unclass. <i>Proteobacteria</i>      | unclass. <i>Proteobacteria</i> | <i>Proteobacteria</i>    | <i>Bacteria</i> |
| Otu1605 | 0                                         | 0.2                            | 0.04              | 0.49                  | 0.06                | 81.45                | unclass. <i>Gammaproteobacteria</i> | unclass. <i>Gammaproteobacteria</i> | unclass. <i>Gammaproteobacteria</i> | <i>Gammaproteobacteria</i>     | <i>Proteobacteria</i>    | <i>Bacteria</i> |
| Otu1650 | 0                                         | 0.2                            | 0.04              | 0.49                  | 0.06                | 81.51                | unclass. <i>Alphaproteobacteria</i> | unclass. <i>Alphaproteobacteria</i> | unclass. <i>Alphaproteobacteria</i> | <i>Alphaproteobacteria</i>     | <i>Proteobacteria</i>    | <i>Bacteria</i> |
| Otu1654 | 0                                         | 0.2                            | 0.04              | 0.49                  | 0.06                | 81.57                | unclass. <i>Proteobacteria</i>      | unclass. <i>Proteobacteria</i>      | unclass. <i>Proteobacteria</i>      | unclass. <i>Proteobacteria</i> | <i>Proteobacteria</i>    | <i>Bacteria</i> |
| Otu1655 | 0                                         | 0.2                            | 0.04              | 0.49                  | 0.06                | 81.63                | unclass. <i>Bacteria</i>            | unclass. <i>Bacteria</i>            | unclass. <i>Bacteria</i>            | unclass. <i>Bacteria</i>       | unclass. <i>Bacteria</i> | <i>Bacteria</i> |

| OTU     | Av.A <sub>i</sub><br>(pH <i>in situ</i> ) | Av.A <sub>i</sub><br>(pH 7.67) | Av.δ <sub>i</sub> | Av.δ <sub>i</sub> /SD | Av.δ <sub>i</sub> % | ΣAv.δ <sub>i</sub> % | Genus                               | Family                              | Order                               | Class                          | Phylum                   | Domain          |
|---------|-------------------------------------------|--------------------------------|-------------------|-----------------------|---------------------|----------------------|-------------------------------------|-------------------------------------|-------------------------------------|--------------------------------|--------------------------|-----------------|
| Otu1656 | 0                                         | 0.2                            | 0.04              | 0.49                  | 0.06                | 81.69                | unclass. <i>Alphaproteobacteria</i> | unclass. <i>Alphaproteobacteria</i> | unclass. <i>Alphaproteobacteria</i> | <i>Alphaproteobacteria</i>     | <i>Proteobacteria</i>    | <i>Bacteria</i> |
| Otu1657 | 0                                         | 0.2                            | 0.04              | 0.49                  | 0.06                | 81.75                | unclass. <i>Bacteroidetes</i>       | unclass. <i>Bacteroidetes</i>       | unclass. <i>Bacteroidetes</i>       | unclass. <i>Bacteroidetes</i>  | <i>Bacteroidetes</i>     | <i>Bacteria</i> |
| Otu1658 | 0                                         | 0.2                            | 0.04              | 0.49                  | 0.06                | 81.81                | unclass. <i>Bacteria</i>            | unclass. <i>Bacteria</i>            | unclass. <i>Bacteria</i>            | unclass. <i>Bacteria</i>       | unclass. <i>Bacteria</i> | <i>Bacteria</i> |
| Otu1660 | 0                                         | 0.2                            | 0.04              | 0.49                  | 0.06                | 81.87                | unclass. <i>Bacteria</i>            | unclass. <i>Bacteria</i>            | unclass. <i>Bacteria</i>            | unclass. <i>Bacteria</i>       | unclass. <i>Bacteria</i> | <i>Bacteria</i> |
| Otu1661 | 0                                         | 0.2                            | 0.04              | 0.49                  | 0.06                | 81.93                | unclass. <i>Gammaproteobacteria</i> | unclass. <i>Gammaproteobacteria</i> | unclass. <i>Gammaproteobacteria</i> | <i>Gammaproteobacteria</i>     | <i>Proteobacteria</i>    | <i>Bacteria</i> |
| Otu1662 | 0                                         | 0.2                            | 0.04              | 0.49                  | 0.06                | 81.99                | unclass. <i>Oceanospirillaceae</i>  | <i>Oceanospirillaceae</i>           | <i>Oceanospirillales</i>            | <i>Gammaproteobacteria</i>     | <i>Proteobacteria</i>    | <i>Bacteria</i> |
| Otu1663 | 0                                         | 0.2                            | 0.04              | 0.49                  | 0.06                | 82.05                | unclass. <i>Proteobacteria</i>      | unclass. <i>Proteobacteria</i>      | unclass. <i>Proteobacteria</i>      | unclass. <i>Proteobacteria</i> | <i>Proteobacteria</i>    | <i>Bacteria</i> |
| Otu1664 | 0                                         | 0.2                            | 0.04              | 0.49                  | 0.06                | 82.11                | unclass. <i>Bacteroidetes</i>       | unclass. <i>Bacteroidetes</i>       | unclass. <i>Bacteroidetes</i>       | unclass. <i>Bacteroidetes</i>  | <i>Bacteroidetes</i>     | <i>Bacteria</i> |
| Otu1665 | 0                                         | 0.2                            | 0.04              | 0.49                  | 0.06                | 82.17                | unclass. <i>Bacteroidetes</i>       | unclass. <i>Bacteroidetes</i>       | unclass. <i>Bacteroidetes</i>       | unclass. <i>Bacteroidetes</i>  | <i>Bacteroidetes</i>     | <i>Bacteria</i> |
| Otu1666 | 0                                         | 0.2                            | 0.04              | 0.49                  | 0.06                | 82.23                | unclass. <i>Bacteria</i>            | unclass. <i>Bacteria</i>            | unclass. <i>Bacteria</i>            | unclass. <i>Bacteria</i>       | unclass. <i>Bacteria</i> | <i>Bacteria</i> |
| Otu1667 | 0                                         | 0.2                            | 0.04              | 0.49                  | 0.06                | 82.29                | unclass. <i>Bacteria</i>            | unclass. <i>Bacteria</i>            | unclass. <i>Bacteria</i>            | unclass. <i>Bacteria</i>       | unclass. <i>Bacteria</i> | <i>Bacteria</i> |
| Otu1668 | 0                                         | 0.2                            | 0.04              | 0.49                  | 0.06                | 82.35                | unclass. <i>Bacteria</i>            | unclass. <i>Bacteria</i>            | unclass. <i>Bacteria</i>            | unclass. <i>Bacteria</i>       | unclass. <i>Bacteria</i> | <i>Bacteria</i> |
| Otu1669 | 0                                         | 0.2                            | 0.04              | 0.49                  | 0.06                | 82.41                | unclass. <i>Myxococcales</i>        | unclass. <i>Myxococcales</i>        | <i>Myxococcales</i>                 | <i>Deltaproteobacteria</i>     | <i>Proteobacteria</i>    | <i>Bacteria</i> |
| Otu1670 | 0                                         | 0.2                            | 0.04              | 0.49                  | 0.06                | 82.47                | unclass. <i>Actinobacteria</i>      | unclass. <i>Actinobacteria</i>      | unclass. <i>Actinobacteria</i>      | <i>Actinobacteria</i>          | <i>Actinobacteria</i>    | <i>Bacteria</i> |
| Otu1671 | 0                                         | 0.2                            | 0.04              | 0.49                  | 0.06                | 82.53                | unclass. <i>Bacteria</i>            | unclass. <i>Bacteria</i>            | unclass. <i>Bacteria</i>            | unclass. <i>Bacteria</i>       | unclass. <i>Bacteria</i> | <i>Bacteria</i> |
| Otu1672 | 0                                         | 0.2                            | 0.04              | 0.49                  | 0.06                | 82.59                | unclass. <i>Bacteria</i>            | unclass. <i>Bacteria</i>            | unclass. <i>Bacteria</i>            | unclass. <i>Bacteria</i>       | unclass. <i>Bacteria</i> | <i>Bacteria</i> |
| Otu1673 | 0                                         | 0.2                            | 0.04              | 0.49                  | 0.06                | 82.65                | unclass. <i>Rickettsiaceae</i>      | <i>Rickettsiaceae</i>               | <i>Rickettsiales</i>                | <i>Alphaproteobacteria</i>     | <i>Proteobacteria</i>    | <i>Bacteria</i> |
| Otu1674 | 0                                         | 0.2                            | 0.04              | 0.49                  | 0.06                | 82.71                | unclass. <i>Bacteria</i>            | unclass. <i>Bacteria</i>            | unclass. <i>Bacteria</i>            | unclass. <i>Bacteria</i>       | unclass. <i>Bacteria</i> | <i>Bacteria</i> |
| Otu1675 | 0                                         | 0.2                            | 0.04              | 0.49                  | 0.06                | 82.77                | unclass. <i>Bacteria</i>            | unclass. <i>Bacteria</i>            | unclass. <i>Bacteria</i>            | unclass. <i>Bacteria</i>       | unclass. <i>Bacteria</i> | <i>Bacteria</i> |
| Otu1676 | 0                                         | 0.2                            | 0.04              | 0.49                  | 0.06                | 82.83                | unclass. <i>Alphaproteobacteria</i> | unclass. <i>Alphaproteobacteria</i> | unclass. <i>Alphaproteobacteria</i> | <i>Alphaproteobacteria</i>     | <i>Proteobacteria</i>    | <i>Bacteria</i> |
| Otu1677 | 0                                         | 0.2                            | 0.04              | 0.49                  | 0.06                | 82.89                | unclass. <i>Bacteria</i>            | unclass. <i>Bacteria</i>            | unclass. <i>Bacteria</i>            | unclass. <i>Bacteria</i>       | unclass. <i>Bacteria</i> | <i>Bacteria</i> |
| Otu1678 | 0                                         | 0.2                            | 0.04              | 0.49                  | 0.06                | 82.95                | unclass. <i>Bacteria</i>            | unclass. <i>Bacteria</i>            | unclass. <i>Bacteria</i>            | unclass. <i>Bacteria</i>       | unclass. <i>Bacteria</i> | <i>Bacteria</i> |
| Otu1679 | 0                                         | 0.2                            | 0.04              | 0.49                  | 0.06                | 83.01                | <i>Actibacter</i>                   | <i>Flavobacteriaceae</i>            | <i>Flavobacteriales</i>             | <i>Flavobacteria</i>           | <i>Bacteroidetes</i>     | <i>Bacteria</i> |
| Otu1680 | 0                                         | 0.2                            | 0.04              | 0.49                  | 0.06                | 83.07                | <i>Aquicella</i>                    | <i>Coxiellaceae</i>                 | <i>Legionellales</i>                | <i>Gammaproteobacteria</i>     | <i>Proteobacteria</i>    | <i>Bacteria</i> |
| Otu1681 | 0                                         | 0.2                            | 0.04              | 0.49                  | 0.06                | 83.13                | unclass. <i>Rhodobacteraceae</i>    | <i>Rhodobacteraceae</i>             | <i>Rhodobacterales</i>              | <i>Alphaproteobacteria</i>     | <i>Proteobacteria</i>    | <i>Bacteria</i> |
| Otu1682 | 0                                         | 0.2                            | 0.04              | 0.49                  | 0.06                | 83.19                | <i>Nitriliruptor</i>                | <i>Nitriliruptoraceae</i>           | <i>Nitriliruptorales</i>            | <i>Actinobacteria</i>          | <i>Actinobacteria</i>    | <i>Bacteria</i> |
| Otu1683 | 0                                         | 0.2                            | 0.04              | 0.49                  | 0.06                | 83.25                | unclass. <i>Gammaproteobacteria</i> | unclass. <i>Gammaproteobacteria</i> | unclass. <i>Gammaproteobacteria</i> | <i>Gammaproteobacteria</i>     | <i>Proteobacteria</i>    | <i>Bacteria</i> |

| OTU     | Av.A <sub>i</sub><br>(pH <i>in situ</i> ) | Av.A <sub>i</sub><br>(pH 7.67) | Av.δ <sub>i</sub> | Av.δ <sub>i</sub> /SD | Av.δ <sub>i</sub> % | ΣAv.δ <sub>i</sub> % | Genus                               | Family                              | Order                               | Class                          | Phylum                   | Domain          |
|---------|-------------------------------------------|--------------------------------|-------------------|-----------------------|---------------------|----------------------|-------------------------------------|-------------------------------------|-------------------------------------|--------------------------------|--------------------------|-----------------|
| Otu1684 | 0                                         | 0.2                            | 0.04              | 0.49                  | 0.06                | 83.31                | unclass. <i>Gammaproteobacteria</i> | unclass. <i>Gammaproteobacteria</i> | unclass. <i>Gammaproteobacteria</i> | <i>Gammaproteobacteria</i>     | <i>Proteobacteria</i>    | <i>Bacteria</i> |
| Otu1685 | 0                                         | 0.2                            | 0.04              | 0.49                  | 0.06                | 83.37                | unclass. <i>Bacteria</i>            | unclass. <i>Bacteria</i>            | unclass. <i>Bacteria</i>            | unclass. <i>Bacteria</i>       | unclass. <i>Bacteria</i> | <i>Bacteria</i> |
| Otu1686 | 0                                         | 0.2                            | 0.04              | 0.49                  | 0.06                | 83.43                | unclass. <i>Bacteria</i>            | unclass. <i>Bacteria</i>            | unclass. <i>Bacteria</i>            | unclass. <i>Bacteria</i>       | unclass. <i>Bacteria</i> | <i>Bacteria</i> |
| Otu1688 | 0                                         | 0.2                            | 0.04              | 0.49                  | 0.06                | 83.49                | unclass. <i>Saprospiraceae</i>      | <i>Saprospiraceae</i>               | <i>Sphingobacteriales</i>           | <i>Sphingobacteria</i>         | <i>Bacteroidetes</i>     | <i>Bacteria</i> |
| Otu1689 | 0                                         | 0.2                            | 0.04              | 0.49                  | 0.06                | 83.55                | unclass. <i>Gammaproteobacteria</i> | unclass. <i>Gammaproteobacteria</i> | unclass. <i>Gammaproteobacteria</i> | <i>Gammaproteobacteria</i>     | <i>Proteobacteria</i>    | <i>Bacteria</i> |
| Otu1690 | 0                                         | 0.2                            | 0.04              | 0.49                  | 0.06                | 83.61                | unclass. <i>Bacteria</i>            | unclass. <i>Bacteria</i>            | unclass. <i>Bacteria</i>            | unclass. <i>Bacteria</i>       | unclass. <i>Bacteria</i> | <i>Bacteria</i> |
| Otu0369 | 0                                         | 0.2                            | 0.04              | 0.49                  | 0.06                | 83.67                | unclass. <i>Deltaproteobacteria</i> | unclass. <i>Deltaproteobacteria</i> | unclass. <i>Deltaproteobacteria</i> | <i>Deltaproteobacteria</i>     | <i>Proteobacteria</i>    | <i>Bacteria</i> |
| Otu0412 | 0                                         | 0.2                            | 0.04              | 0.49                  | 0.06                | 83.73                | unclass. <i>Bacteroidetes</i>       | unclass. <i>Bacteroidetes</i>       | unclass. <i>Bacteroidetes</i>       | unclass. <i>Bacteroidetes</i>  | <i>Bacteroidetes</i>     | <i>Bacteria</i> |
| Otu0424 | 0                                         | 0.2                            | 0.04              | 0.49                  | 0.06                | 83.79                | unclass. <i>Flavobacteriales</i>    | unclass. <i>Flavobacteriales</i>    | <i>Flavobacteriales</i>             | <i>Flavobacteria</i>           | <i>Bacteroidetes</i>     | <i>Bacteria</i> |
| Otu0448 | 0                                         | 0.2                            | 0.04              | 0.49                  | 0.06                | 83.85                | unclass. <i>Desulfuromonadaceae</i> | <i>Desulfuromonadaceae</i>          | <i>Desulfuromonadales</i>           | <i>Deltaproteobacteria</i>     | <i>Proteobacteria</i>    | <i>Bacteria</i> |
| Otu0551 | 0                                         | 0.2                            | 0.04              | 0.49                  | 0.06                | 83.91                | <i>Arcobacter</i>                   | <i>Campylobacteraceae</i>           | <i>Campylobacterales</i>            | <i>Epsilonproteobacteria</i>   | <i>Proteobacteria</i>    | <i>Bacteria</i> |
| Otu0620 | 0                                         | 0.2                            | 0.04              | 0.49                  | 0.06                | 83.97                | unclass. <i>Nannocystaceae</i>      | <i>Nannocystaceae</i>               | <i>Myxococcales</i>                 | <i>Deltaproteobacteria</i>     | <i>Proteobacteria</i>    | <i>Bacteria</i> |
| Otu0887 | 0                                         | 0.2                            | 0.04              | 0.49                  | 0.06                | 84.03                | <i>Winogradskyella</i>              | <i>Flavobacteriaceae</i>            | <i>Flavobacteriales</i>             | <i>Flavobacteria</i>           | <i>Bacteroidetes</i>     | <i>Bacteria</i> |
| Otu1149 | 0                                         | 0.2                            | 0.04              | 0.49                  | 0.06                | 84.09                | unclass. <i>Bacteria</i>            | unclass. <i>Bacteria</i>            | unclass. <i>Bacteria</i>            | unclass. <i>Bacteria</i>       | unclass. <i>Bacteria</i> | <i>Bacteria</i> |
| Otu1196 | 0                                         | 0.2                            | 0.04              | 0.49                  | 0.06                | 84.15                | unclass. <i>Bacteria</i>            | unclass. <i>Bacteria</i>            | unclass. <i>Bacteria</i>            | unclass. <i>Bacteria</i>       | unclass. <i>Bacteria</i> | <i>Bacteria</i> |
| Otu1212 | 0                                         | 0.2                            | 0.04              | 0.49                  | 0.06                | 84.21                | unclass. <i>Bacteria</i>            | unclass. <i>Bacteria</i>            | unclass. <i>Bacteria</i>            | unclass. <i>Bacteria</i>       | unclass. <i>Bacteria</i> | <i>Bacteria</i> |
| Otu1242 | 0                                         | 0.2                            | 0.04              | 0.49                  | 0.06                | 84.27                | unclass. <i>Bacteria</i>            | unclass. <i>Bacteria</i>            | unclass. <i>Bacteria</i>            | unclass. <i>Bacteria</i>       | unclass. <i>Bacteria</i> | <i>Bacteria</i> |
| Otu1354 | 0                                         | 0.2                            | 0.04              | 0.49                  | 0.06                | 84.33                | unclass. <i>Gammaproteobacteria</i> | unclass. <i>Gammaproteobacteria</i> | unclass. <i>Gammaproteobacteria</i> | <i>Gammaproteobacteria</i>     | <i>Proteobacteria</i>    | <i>Bacteria</i> |
| Otu1395 | 0                                         | 0.2                            | 0.04              | 0.49                  | 0.06                | 84.39                | unclass. <i>Bacteria</i>            | unclass. <i>Bacteria</i>            | unclass. <i>Bacteria</i>            | unclass. <i>Bacteria</i>       | unclass. <i>Bacteria</i> | <i>Bacteria</i> |
| Otu1424 | 0                                         | 0.2                            | 0.04              | 0.49                  | 0.06                | 84.45                | unclass. <i>Gammaproteobacteria</i> | unclass. <i>Gammaproteobacteria</i> | unclass. <i>Gammaproteobacteria</i> | <i>Gammaproteobacteria</i>     | <i>Proteobacteria</i>    | <i>Bacteria</i> |
| Otu1504 | 0                                         | 0.2                            | 0.04              | 0.49                  | 0.06                | 84.51                | unclass. <i>Proteobacteria</i>      | unclass. <i>Proteobacteria</i>      | unclass. <i>Proteobacteria</i>      | unclass. <i>Proteobacteria</i> | <i>Proteobacteria</i>    | <i>Bacteria</i> |
| Otu1551 | 0                                         | 0.2                            | 0.04              | 0.49                  | 0.06                | 84.57                | unclass. <i>Gammaproteobacteria</i> | unclass. <i>Gammaproteobacteria</i> | unclass. <i>Gammaproteobacteria</i> | <i>Gammaproteobacteria</i>     | <i>Proteobacteria</i>    | <i>Bacteria</i> |
| Otu1553 | 0                                         | 0.2                            | 0.04              | 0.49                  | 0.06                | 84.63                | unclass. <i>Flavobacteriales</i>    | unclass. <i>Flavobacteriales</i>    | <i>Flavobacteriales</i>             | <i>Flavobacteria</i>           | <i>Bacteroidetes</i>     | <i>Bacteria</i> |
| Otu1555 | 0                                         | 0.2                            | 0.04              | 0.49                  | 0.06                | 84.69                | unclass. <i>Gammaproteobacteria</i> | unclass. <i>Gammaproteobacteria</i> | unclass. <i>Gammaproteobacteria</i> | <i>Gammaproteobacteria</i>     | <i>Proteobacteria</i>    | <i>Bacteria</i> |
| Otu1558 | 0                                         | 0.2                            | 0.04              | 0.49                  | 0.06                | 84.75                | unclass. <i>Flavobacteriales</i>    | unclass. <i>Flavobacteriales</i>    | <i>Flavobacteriales</i>             | <i>Flavobacteria</i>           | <i>Bacteroidetes</i>     | <i>Bacteria</i> |
| Otu1559 | 0                                         | 0.2                            | 0.04              | 0.49                  | 0.06                | 84.81                | unclass. <i>Gammaproteobacteria</i> | unclass. <i>Gammaproteobacteria</i> | unclass. <i>Gammaproteobacteria</i> | <i>Gammaproteobacteria</i>     | <i>Proteobacteria</i>    | <i>Bacteria</i> |
| Otu1560 | 0                                         | 0.2                            | 0.04              | 0.49                  | 0.06                | 84.87                | <i>Gaetbulibacter</i>               | <i>Flavobacteriaceae</i>            | <i>Flavobacteriales</i>             | <i>Flavobacteria</i>           | <i>Bacteroidetes</i>     | <i>Bacteria</i> |



| OTU     | Av.A <sub>i</sub><br>(pH <i>in situ</i> ) | Av.A <sub>i</sub><br>(pH 7.67) | Av.δ <sub>i</sub> | Av.δ <sub>i</sub> /SD | Av.δ <sub>i</sub> % | ΣAv.δ <sub>i</sub> % | Genus                               | Family                              | Order                               | Class                         | Phylum                   | Domain          |
|---------|-------------------------------------------|--------------------------------|-------------------|-----------------------|---------------------|----------------------|-------------------------------------|-------------------------------------|-------------------------------------|-------------------------------|--------------------------|-----------------|
| Otu1561 | 0                                         | 0.2                            | 0.04              | 0.49                  | 0.06                | 84.93                | unclass. <i>Acidobacteria_Gp22</i>  | unclass. <i>Acidobacteria_Gp22</i>  | unclass. <i>Acidobacteria_Gp22</i>  | <i>Acidobacteria_Gp22</i>     | <i>Acidobacteria</i>     | <i>Bacteria</i> |
| Otu1562 | 0                                         | 0.2                            | 0.04              | 0.49                  | 0.06                | 84.99                | unclass. <i>Desulfobacteraceae</i>  | <i>Desulfobacteraceae</i>           | <i>Desulfobacterales</i>            | <i>Deltaproteobacteria</i>    | <i>Proteobacteria</i>    | <i>Bacteria</i> |
| Otu1564 | 0                                         | 0.2                            | 0.04              | 0.49                  | 0.06                | 85.05                | unclass. <i>Colwelliaceae</i>       | <i>Colwelliaceae</i>                | <i>Alteromonadales</i>              | <i>Gammaproteobacteria</i>    | <i>Proteobacteria</i>    | <i>Bacteria</i> |
| Otu1567 | 0                                         | 0.2                            | 0.04              | 0.49                  | 0.06                | 85.11                | unclass. <i>Bacteroidetes</i>       | unclass. <i>Bacteroidetes</i>       | unclass. <i>Bacteroidetes</i>       | unclass. <i>Bacteroidetes</i> | <i>Bacteroidetes</i>     | <i>Bacteria</i> |
| Otu1568 | 0                                         | 0.2                            | 0.04              | 0.49                  | 0.06                | 85.17                | unclass. <i>Bacteroidetes</i>       | unclass. <i>Bacteroidetes</i>       | unclass. <i>Bacteroidetes</i>       | unclass. <i>Bacteroidetes</i> | <i>Bacteroidetes</i>     | <i>Bacteria</i> |
| Otu1569 | 0                                         | 0.2                            | 0.04              | 0.49                  | 0.06                | 85.23                | unclass. <i>Flavobacteriales</i>    | unclass. <i>Flavobacteriales</i>    | <i>Flavobacteriales</i>             | <i>Flavobacteria</i>          | <i>Bacteroidetes</i>     | <i>Bacteria</i> |
| Otu1570 | 0                                         | 0.2                            | 0.04              | 0.49                  | 0.06                | 85.29                | unclass. <i>Bacteria</i>            | unclass. <i>Bacteria</i>            | unclass. <i>Bacteria</i>            | unclass. <i>Bacteria</i>      | unclass. <i>Bacteria</i> | <i>Bacteria</i> |
| Otu1571 | 0                                         | 0.2                            | 0.04              | 0.49                  | 0.06                | 85.35                | unclass. <i>Bacteroidetes</i>       | unclass. <i>Bacteroidetes</i>       | unclass. <i>Bacteroidetes</i>       | unclass. <i>Bacteroidetes</i> | <i>Bacteroidetes</i>     | <i>Bacteria</i> |
| Otu1572 | 0                                         | 0.2                            | 0.04              | 0.49                  | 0.06                | 85.41                | unclass. <i>Bacteroidetes</i>       | unclass. <i>Bacteroidetes</i>       | unclass. <i>Bacteroidetes</i>       | unclass. <i>Bacteroidetes</i> | <i>Bacteroidetes</i>     | <i>Bacteria</i> |
| Otu1573 | 0                                         | 0.2                            | 0.04              | 0.49                  | 0.06                | 85.47                | unclass. <i>Flammeovirgaceae</i>    | <i>Flammeovirgaceae</i>             | <i>Sphingobacteriales</i>           | <i>Sphingobacteria</i>        | <i>Bacteroidetes</i>     | <i>Bacteria</i> |
| Otu1574 | 0                                         | 0.2                            | 0.04              | 0.49                  | 0.06                | 85.53                | unclass. <i>Bacteria</i>            | unclass. <i>Bacteria</i>            | unclass. <i>Bacteria</i>            | unclass. <i>Bacteria</i>      | unclass. <i>Bacteria</i> | <i>Bacteria</i> |
| Otu1575 | 0                                         | 0.2                            | 0.04              | 0.49                  | 0.06                | 85.59                | unclass. <i>Bacteria</i>            | unclass. <i>Bacteria</i>            | unclass. <i>Bacteria</i>            | unclass. <i>Bacteria</i>      | unclass. <i>Bacteria</i> | <i>Bacteria</i> |
| Otu1576 | 0                                         | 0.2                            | 0.04              | 0.49                  | 0.06                | 85.65                | unclass. <i>Deltaproteobacteria</i> | unclass. <i>Deltaproteobacteria</i> | unclass. <i>Deltaproteobacteria</i> | <i>Deltaproteobacteria</i>    | <i>Proteobacteria</i>    | <i>Bacteria</i> |
| Otu1579 | 0                                         | 0.2                            | 0.04              | 0.49                  | 0.06                | 85.71                | unclass. <i>Bacteroidetes</i>       | unclass. <i>Bacteroidetes</i>       | unclass. <i>Bacteroidetes</i>       | unclass. <i>Bacteroidetes</i> | <i>Bacteroidetes</i>     | <i>Bacteria</i> |
| Otu1580 | 0                                         | 0.2                            | 0.04              | 0.49                  | 0.06                | 85.77                | <i>Leucothrix</i>                   | <i>Thiotrichaceae</i>               | <i>Thiotrichales</i>                | <i>Gammaproteobacteria</i>    | <i>Proteobacteria</i>    | <i>Bacteria</i> |
| Otu1582 | 0                                         | 0.2                            | 0.04              | 0.49                  | 0.06                | 85.83                | unclass. <i>Bacteria</i>            | unclass. <i>Bacteria</i>            | unclass. <i>Bacteria</i>            | unclass. <i>Bacteria</i>      | unclass. <i>Bacteria</i> | <i>Bacteria</i> |
| Otu1584 | 0                                         | 0.2                            | 0.04              | 0.49                  | 0.06                | 85.89                | unclass. <i>Bacteria</i>            | unclass. <i>Bacteria</i>            | unclass. <i>Bacteria</i>            | unclass. <i>Bacteria</i>      | unclass. <i>Bacteria</i> | <i>Bacteria</i> |
| Otu1585 | 0                                         | 0.2                            | 0.04              | 0.49                  | 0.06                | 85.95                | unclass. <i>Rhodobacteraceae</i>    | <i>Rhodobacteraceae</i>             | <i>Rhodobacterales</i>              | <i>Alphaproteobacteria</i>    | <i>Proteobacteria</i>    | <i>Bacteria</i> |
| Otu1586 | 0                                         | 0.2                            | 0.04              | 0.49                  | 0.06                | 86.01                | unclass. <i>Bacteria</i>            | unclass. <i>Bacteria</i>            | unclass. <i>Bacteria</i>            | unclass. <i>Bacteria</i>      | unclass. <i>Bacteria</i> | <i>Bacteria</i> |
| Otu1587 | 0                                         | 0.2                            | 0.04              | 0.49                  | 0.06                | 86.07                | unclass. <i>Bacteria</i>            | unclass. <i>Bacteria</i>            | unclass. <i>Bacteria</i>            | unclass. <i>Bacteria</i>      | unclass. <i>Bacteria</i> | <i>Bacteria</i> |
| Otu1588 | 0                                         | 0.2                            | 0.04              | 0.49                  | 0.06                | 86.13                | unclass. <i>Gammaproteobacteria</i> | unclass. <i>Gammaproteobacteria</i> | unclass. <i>Gammaproteobacteria</i> | <i>Gammaproteobacteria</i>    | <i>Proteobacteria</i>    | <i>Bacteria</i> |
| Otu1589 | 0                                         | 0.2                            | 0.04              | 0.49                  | 0.06                | 86.19                | unclass. <i>Rhodobacteraceae</i>    | <i>Rhodobacteraceae</i>             | <i>Rhodobacterales</i>              | <i>Alphaproteobacteria</i>    | <i>Proteobacteria</i>    | <i>Bacteria</i> |
| Otu1590 | 0                                         | 0.2                            | 0.04              | 0.49                  | 0.06                | 86.25                | unclass. <i>Flavobacteriales</i>    | unclass. <i>Flavobacteriales</i>    | <i>Flavobacteriales</i>             | <i>Flavobacteria</i>          | <i>Bacteroidetes</i>     | <i>Bacteria</i> |
| Otu1591 | 0                                         | 0.2                            | 0.04              | 0.49                  | 0.06                | 86.31                | unclass. <i>Sphingobacteriales</i>  | unclass. <i>Sphingobacteriales</i>  | <i>Sphingobacteriales</i>           | <i>Sphingobacteria</i>        | <i>Bacteroidetes</i>     | <i>Bacteria</i> |
| Otu1592 | 0                                         | 0.2                            | 0.04              | 0.49                  | 0.06                | 86.37                | unclass. <i>Bacteroidetes</i>       | unclass. <i>Bacteroidetes</i>       | unclass. <i>Bacteroidetes</i>       | unclass. <i>Bacteroidetes</i> | <i>Bacteroidetes</i>     | <i>Bacteria</i> |
| Otu1593 | 0                                         | 0.2                            | 0.04              | 0.49                  | 0.06                | 86.43                | <i>Planctomyces</i>                 | <i>Planctomycetaceae</i>            | <i>Planctomycetales</i>             | <i>Planctomycetacia</i>       | <i>Planctomycetes</i>    | <i>Bacteria</i> |
| Otu1594 | 0                                         | 0.2                            | 0.04              | 0.49                  | 0.06                | 86.49                | unclass. <i>Gammaproteobacteria</i> | unclass. <i>Gammaproteobacteria</i> | unclass. <i>Gammaproteobacteria</i> | <i>Gammaproteobacteria</i>    | <i>Proteobacteria</i>    | <i>Bacteria</i> |

| OTU     | Av.A <sub>i</sub><br>(pH <i>in situ</i> ) | Av.A <sub>i</sub><br>(pH 7.67) | Av.δ <sub>i</sub> | Av.δ <sub>i</sub> /SD | Av.δ <sub>i</sub> % | ΣAv.δ <sub>i</sub> % | Genus                               | Family                                     | Order                               | Class                         | Phylum                   | Domain          |
|---------|-------------------------------------------|--------------------------------|-------------------|-----------------------|---------------------|----------------------|-------------------------------------|--------------------------------------------|-------------------------------------|-------------------------------|--------------------------|-----------------|
| Otu1595 | 0                                         | 0.2                            | 0.04              | 0.49                  | 0.06                | 86.55                | unclass. <i>Bacteria</i>            | unclass. <i>Bacteria</i>                   | unclass. <i>Bacteria</i>            | unclass. <i>Bacteria</i>      | unclass. <i>Bacteria</i> | <i>Bacteria</i> |
| Otu1596 | 0                                         | 0.2                            | 0.04              | 0.49                  | 0.06                | 86.61                | unclass. <i>Bacteroidetes</i>       | unclass. <i>Bacteroidetes</i>              | unclass. <i>Bacteroidetes</i>       | unclass. <i>Bacteroidetes</i> | <i>Bacteroidetes</i>     | <i>Bacteria</i> |
| Otu1597 | 0                                         | 0.2                            | 0.04              | 0.49                  | 0.06                | 86.67                | <i>Methylophaga</i>                 | <i>Piscirickettsiaceae</i>                 | <i>Thiotrichales</i>                | <i>Gammaproteobacteria</i>    | <i>Proteobacteria</i>    | <i>Bacteria</i> |
| Otu1598 | 0                                         | 0.2                            | 0.04              | 0.49                  | 0.06                | 86.73                | unclass. <i>Bacteria</i>            | unclass. <i>Bacteria</i>                   | unclass. <i>Bacteria</i>            | unclass. <i>Bacteria</i>      | unclass. <i>Bacteria</i> | <i>Bacteria</i> |
| Otu1600 | 0                                         | 0.2                            | 0.04              | 0.49                  | 0.06                | 86.79                | unclass. <i>Bacteroidetes</i>       | unclass. <i>Bacteroidetes</i>              | unclass. <i>Bacteroidetes</i>       | unclass. <i>Bacteroidetes</i> | <i>Bacteroidetes</i>     | <i>Bacteria</i> |
| Otu1601 | 0                                         | 0.2                            | 0.04              | 0.49                  | 0.06                | 86.85                | unclass. <i>Bacteria</i>            | unclass. <i>Bacteria</i>                   | unclass. <i>Bacteria</i>            | unclass. <i>Bacteria</i>      | unclass. <i>Bacteria</i> | <i>Bacteria</i> |
| Otu1602 | 0                                         | 0.2                            | 0.04              | 0.49                  | 0.06                | 86.91                | unclass. <i>Bacteroidetes</i>       | unclass. <i>Bacteroidetes</i>              | unclass. <i>Bacteroidetes</i>       | unclass. <i>Bacteroidetes</i> | <i>Bacteroidetes</i>     | <i>Bacteria</i> |
| Otu0041 | 0.2                                       | 0                              | 0.04              | 0.49                  | 0.06                | 86.97                | <i>Sulfitobacter</i>                | <i>Rhodobacteraceae</i>                    | <i>Rhodobacterales</i>              | <i>Alphaproteobacteria</i>    | <i>Proteobacteria</i>    | <i>Bacteria</i> |
| Otu0077 | 0.2                                       | 0                              | 0.04              | 0.49                  | 0.06                | 87.03                | unclass. <i>Bacteria</i>            | unclass. <i>Bacteria</i>                   | unclass. <i>Bacteria</i>            | unclass. <i>Bacteria</i>      | unclass. <i>Bacteria</i> | <i>Bacteria</i> |
| Otu0078 | 0.2                                       | 0                              | 0.04              | 0.49                  | 0.06                | 87.08                | <i>Erythrobacter</i>                | <i>Erythrobacteraceae</i>                  | <i>Sphingomonadales</i>             | <i>Alphaproteobacteria</i>    | <i>Proteobacteria</i>    | <i>Bacteria</i> |
| Otu0196 | 0.2                                       | 0                              | 0.04              | 0.49                  | 0.06                | 87.14                | unclass. <i>Flavobacteriaceae</i>   | <i>Flavobacteriaceae</i>                   | <i>Flavobacteriales</i>             | <i>Flavobacteria</i>          | <i>Bacteroidetes</i>     | <i>Bacteria</i> |
| Otu0239 | 0.2                                       | 0                              | 0.04              | 0.49                  | 0.06                | 87.2                 | unclass. <i>Gammaproteobacteria</i> | unclass. <i>Gammaproteobacteria</i>        | unclass. <i>Gammaproteobacteria</i> | <i>Gammaproteobacteria</i>    | <i>Proteobacteria</i>    | <i>Bacteria</i> |
| Otu0297 | 0.2                                       | 0                              | 0.04              | 0.49                  | 0.06                | 87.26                | <i>Lutibacter</i>                   | <i>Flavobacteriaceae</i>                   | <i>Flavobacteriales</i>             | <i>Flavobacteria</i>          | <i>Bacteroidetes</i>     | <i>Bacteria</i> |
| Otu0304 | 0.2                                       | 0                              | 0.04              | 0.49                  | 0.06                | 87.32                | unclass. <i>Bacteria</i>            | unclass. <i>Bacteria</i>                   | unclass. <i>Bacteria</i>            | unclass. <i>Bacteria</i>      | unclass. <i>Bacteria</i> | <i>Bacteria</i> |
| Otu0332 | 0.2                                       | 0                              | 0.04              | 0.49                  | 0.06                | 87.38                | unclass. <i>Gammaproteobacteria</i> | unclass. <i>Gammaproteobacteria</i>        | unclass. <i>Gammaproteobacteria</i> | <i>Gammaproteobacteria</i>    | <i>Proteobacteria</i>    | <i>Bacteria</i> |
| Otu0342 | 0.2                                       | 0                              | 0.04              | 0.49                  | 0.06                | 87.44                | unclass. <i>Gammaproteobacteria</i> | unclass. <i>Gammaproteobacteria</i>        | unclass. <i>Gammaproteobacteria</i> | <i>Gammaproteobacteria</i>    | <i>Proteobacteria</i>    | <i>Bacteria</i> |
| Otu0403 | 0.2                                       | 0                              | 0.04              | 0.49                  | 0.06                | 87.5                 | unclass. <i>Acidobacteria_Gp10</i>  | unclass. <i>Acidobacteria_Gp10</i>         | unclass. <i>Acidobacteria_Gp10</i>  | <i>Acidobacteria_Gp10</i>     | <i>Acidobacteria</i>     | <i>Bacteria</i> |
| Otu0431 | 0.2                                       | 0                              | 0.04              | 0.49                  | 0.06                | 87.56                | unclass. <i>Flammeovirgaceae</i>    | <i>Flammeovirgaceae</i>                    | <i>Sphingobacteriales</i>           | <i>Sphingobacteria</i>        | <i>Bacteroidetes</i>     | <i>Bacteria</i> |
| Otu0491 | 0.2                                       | 0                              | 0.04              | 0.49                  | 0.06                | 87.62                | unclass. <i>Flavobacteriales</i>    | unclass. <i>Flavobacteriales</i>           | <i>Flavobacteriales</i>             | <i>Flavobacteria</i>          | <i>Bacteroidetes</i>     | <i>Bacteria</i> |
| Otu0582 | 0.2                                       | 0                              | 0.04              | 0.49                  | 0.06                | 87.68                | unclass. <i>Rhodobacteraceae</i>    | <i>Rhodobacteraceae</i>                    | <i>Rhodobacterales</i>              | <i>Alphaproteobacteria</i>    | <i>Proteobacteria</i>    | <i>Bacteria</i> |
| Otu0795 | 0.2                                       | 0                              | 0.04              | 0.49                  | 0.06                | 87.74                | unclass. <i>Bacteria</i>            | unclass. <i>Bacteria</i>                   | unclass. <i>Bacteria</i>            | unclass. <i>Bacteria</i>      | unclass. <i>Bacteria</i> | <i>Bacteria</i> |
| Otu0855 | 0.2                                       | 0                              | 0.04              | 0.49                  | 0.06                | 87.8                 | <i>Dasania</i>                      | <i>Pseudomonadales_incertae_se<br/>dis</i> | <i>Pseudomonadales</i>              | <i>Gammaproteobacteria</i>    | <i>Proteobacteria</i>    | <i>Bacteria</i> |
| Otu0936 | 0.2                                       | 0                              | 0.04              | 0.49                  | 0.06                | 87.86                | unclass. <i>Gammaproteobacteria</i> | unclass. <i>Gammaproteobacteria</i>        | unclass. <i>Gammaproteobacteria</i> | <i>Gammaproteobacteria</i>    | <i>Proteobacteria</i>    | <i>Bacteria</i> |
| Otu0951 | 0.2                                       | 0                              | 0.04              | 0.49                  | 0.06                | 87.92                | <i>Haliea</i>                       | <i>Alteromonadaceae</i>                    | <i>Alteromonadales</i>              | <i>Gammaproteobacteria</i>    | <i>Proteobacteria</i>    | <i>Bacteria</i> |
| Otu1022 | 0.2                                       | 0                              | 0.04              | 0.49                  | 0.06                | 87.98                | unclass. <i>Gammaproteobacteria</i> | unclass. <i>Gammaproteobacteria</i>        | unclass. <i>Gammaproteobacteria</i> | <i>Gammaproteobacteria</i>    | <i>Proteobacteria</i>    | <i>Bacteria</i> |
| Otu1163 | 0.2                                       | 0                              | 0.04              | 0.49                  | 0.06                | 88.04                | unclass. <i>Bacteria</i>            | unclass. <i>Bacteria</i>                   | unclass. <i>Bacteria</i>            | unclass. <i>Bacteria</i>      | unclass. <i>Bacteria</i> | <i>Bacteria</i> |
| Otu1177 | 0.2                                       | 0                              | 0.04              | 0.49                  | 0.06                | 88.1                 | unclass. <i>Erythrobacteraceae</i>  | <i>Erythrobacteraceae</i>                  | <i>Sphingomonadales</i>             | <i>Alphaproteobacteria</i>    | <i>Proteobacteria</i>    | <i>Bacteria</i> |

| OTU     | Av.A <sub>i</sub><br>(pH <i>in situ</i> ) | Av.A <sub>i</sub><br>(pH 7.67) | Av.δ <sub>i</sub> | Av.δ <sub>i</sub> /SD | Av.δ <sub>i</sub> % | ΣAv.δ <sub>i</sub> % | Genus                               | Family                              | Order                               | Class                          | Phylum                   | Domain          |
|---------|-------------------------------------------|--------------------------------|-------------------|-----------------------|---------------------|----------------------|-------------------------------------|-------------------------------------|-------------------------------------|--------------------------------|--------------------------|-----------------|
| Otu1190 | 0.2                                       | 0                              | 0.04              | 0.49                  | 0.06                | 88.16                | unclass. <i>Gammaproteobacteria</i> | unclass. <i>Gammaproteobacteria</i> | unclass. <i>Gammaproteobacteria</i> | <i>Gammaproteobacteria</i>     | <i>Proteobacteria</i>    | <i>Bacteria</i> |
| Otu1218 | 0.2                                       | 0                              | 0.04              | 0.49                  | 0.06                | 88.22                | unclass. <i>Bacteria</i>            | unclass. <i>Bacteria</i>            | unclass. <i>Bacteria</i>            | unclass. <i>Bacteria</i>       | unclass. <i>Bacteria</i> | <i>Bacteria</i> |
| Otu1220 | 0.2                                       | 0                              | 0.04              | 0.49                  | 0.06                | 88.28                | unclass. <i>Bacteria</i>            | unclass. <i>Bacteria</i>            | unclass. <i>Bacteria</i>            | unclass. <i>Bacteria</i>       | unclass. <i>Bacteria</i> | <i>Bacteria</i> |
| Otu1221 | 0.2                                       | 0                              | 0.04              | 0.49                  | 0.06                | 88.34                | unclass. <i>Flavobacteriales</i>    | unclass. <i>Flavobacteriales</i>    | <i>Flavobacteriales</i>             | <i>Flavobacteria</i>           | <i>Bacteroidetes</i>     | <i>Bacteria</i> |
| Otu1225 | 0.2                                       | 0                              | 0.04              | 0.49                  | 0.06                | 88.4                 | unclass. <i>Proteobacteria</i>      | unclass. <i>Proteobacteria</i>      | unclass. <i>Proteobacteria</i>      | unclass. <i>Proteobacteria</i> | <i>Proteobacteria</i>    | <i>Bacteria</i> |
| Otu1227 | 0.2                                       | 0                              | 0.04              | 0.49                  | 0.06                | 88.45                | unclass. <i>Bacteria</i>            | unclass. <i>Bacteria</i>            | unclass. <i>Bacteria</i>            | unclass. <i>Bacteria</i>       | unclass. <i>Bacteria</i> | <i>Bacteria</i> |
| Otu1230 | 0.2                                       | 0                              | 0.04              | 0.49                  | 0.06                | 88.51                | unclass. <i>Bacteroidetes</i>       | unclass. <i>Bacteroidetes</i>       | unclass. <i>Bacteroidetes</i>       | unclass. <i>Bacteroidetes</i>  | <i>Bacteroidetes</i>     | <i>Bacteria</i> |
| Otu1239 | 0.2                                       | 0                              | 0.04              | 0.49                  | 0.06                | 88.57                | <i>Sneathiella</i>                  | <i>Sneathiaceae</i>                 | <i>Sneathiellales</i>               | <i>Alphaproteobacteria</i>     | <i>Proteobacteria</i>    | <i>Bacteria</i> |
| Otu1240 | 0.2                                       | 0                              | 0.04              | 0.49                  | 0.06                | 88.63                | unclass. <i>Gammaproteobacteria</i> | unclass. <i>Gammaproteobacteria</i> | unclass. <i>Gammaproteobacteria</i> | <i>Gammaproteobacteria</i>     | <i>Proteobacteria</i>    | <i>Bacteria</i> |
| Otu1241 | 0.2                                       | 0                              | 0.04              | 0.49                  | 0.06                | 88.69                | unclass. <i>Gammaproteobacteria</i> | unclass. <i>Gammaproteobacteria</i> | unclass. <i>Gammaproteobacteria</i> | <i>Gammaproteobacteria</i>     | <i>Proteobacteria</i>    | <i>Bacteria</i> |
| Otu1243 | 0.2                                       | 0                              | 0.04              | 0.49                  | 0.06                | 88.75                | unclass. <i>Bacteria</i>            | unclass. <i>Bacteria</i>            | unclass. <i>Bacteria</i>            | unclass. <i>Bacteria</i>       | unclass. <i>Bacteria</i> | <i>Bacteria</i> |
| Otu1244 | 0.2                                       | 0                              | 0.04              | 0.49                  | 0.06                | 88.81                | unclass. <i>Bacteria</i>            | unclass. <i>Bacteria</i>            | unclass. <i>Bacteria</i>            | unclass. <i>Bacteria</i>       | unclass. <i>Bacteria</i> | <i>Bacteria</i> |
| Otu1246 | 0.2                                       | 0                              | 0.04              | 0.49                  | 0.06                | 88.87                | unclass. <i>Gammaproteobacteria</i> | unclass. <i>Gammaproteobacteria</i> | unclass. <i>Gammaproteobacteria</i> | <i>Gammaproteobacteria</i>     | <i>Proteobacteria</i>    | <i>Bacteria</i> |
| Otu1248 | 0.2                                       | 0                              | 0.04              | 0.49                  | 0.06                | 88.93                | unclass. <i>Bacteria</i>            | unclass. <i>Bacteria</i>            | unclass. <i>Bacteria</i>            | unclass. <i>Bacteria</i>       | unclass. <i>Bacteria</i> | <i>Bacteria</i> |
| Otu1250 | 0.2                                       | 0                              | 0.04              | 0.49                  | 0.06                | 88.99                | unclass. <i>Bacteria</i>            | unclass. <i>Bacteria</i>            | unclass. <i>Bacteria</i>            | unclass. <i>Bacteria</i>       | unclass. <i>Bacteria</i> | <i>Bacteria</i> |
| Otu1251 | 0.2                                       | 0                              | 0.04              | 0.49                  | 0.06                | 89.05                | unclass. <i>Bacteria</i>            | unclass. <i>Bacteria</i>            | unclass. <i>Bacteria</i>            | unclass. <i>Bacteria</i>       | unclass. <i>Bacteria</i> | <i>Bacteria</i> |
| Otu1252 | 0.2                                       | 0                              | 0.04              | 0.49                  | 0.06                | 89.11                | unclass. <i>Flavobacteriaceae</i>   | <i>Flavobacteriaceae</i>            | <i>Flavobacteriales</i>             | <i>Flavobacteria</i>           | <i>Bacteroidetes</i>     | <i>Bacteria</i> |
| Otu1253 | 0.2                                       | 0                              | 0.04              | 0.49                  | 0.06                | 89.17                | unclass. <i>Proteobacteria</i>      | unclass. <i>Proteobacteria</i>      | unclass. <i>Proteobacteria</i>      | unclass. <i>Proteobacteria</i> | <i>Proteobacteria</i>    | <i>Bacteria</i> |
| Otu1258 | 0.2                                       | 0                              | 0.04              | 0.49                  | 0.06                | 89.23                | <i>Amphritea</i>                    | <i>Oceanospirillaceae</i>           | <i>Oceanospirillales</i>            | <i>Gammaproteobacteria</i>     | <i>Proteobacteria</i>    | <i>Bacteria</i> |
| Otu1259 | 0.2                                       | 0                              | 0.04              | 0.49                  | 0.06                | 89.29                | unclass. <i>Nannocystaceae</i>      | <i>Nannocystaceae</i>               | <i>Myxococcales</i>                 | <i>Deltaproteobacteria</i>     | <i>Proteobacteria</i>    | <i>Bacteria</i> |
| Otu1262 | 0.2                                       | 0                              | 0.04              | 0.49                  | 0.06                | 89.35                | unclass. <i>Bacteroidetes</i>       | unclass. <i>Bacteroidetes</i>       | unclass. <i>Bacteroidetes</i>       | unclass. <i>Bacteroidetes</i>  | <i>Bacteroidetes</i>     | <i>Bacteria</i> |
| Otu1263 | 0.2                                       | 0                              | 0.04              | 0.49                  | 0.06                | 89.41                | unclass. <i>Gammaproteobacteria</i> | unclass. <i>Gammaproteobacteria</i> | unclass. <i>Gammaproteobacteria</i> | <i>Gammaproteobacteria</i>     | <i>Proteobacteria</i>    | <i>Bacteria</i> |
| Otu1264 | 0.2                                       | 0                              | 0.04              | 0.49                  | 0.06                | 89.47                | unclass. <i>Bacteria</i>            | unclass. <i>Bacteria</i>            | unclass. <i>Bacteria</i>            | unclass. <i>Bacteria</i>       | unclass. <i>Bacteria</i> | <i>Bacteria</i> |
| Otu1265 | 0.2                                       | 0                              | 0.04              | 0.49                  | 0.06                | 89.53                | unclass. <i>Bacteria</i>            | unclass. <i>Bacteria</i>            | unclass. <i>Bacteria</i>            | unclass. <i>Bacteria</i>       | unclass. <i>Bacteria</i> | <i>Bacteria</i> |
| Otu1266 | 0.2                                       | 0                              | 0.04              | 0.49                  | 0.06                | 89.59                | unclass. <i>Gammaproteobacteria</i> | unclass. <i>Gammaproteobacteria</i> | unclass. <i>Gammaproteobacteria</i> | <i>Gammaproteobacteria</i>     | <i>Proteobacteria</i>    | <i>Bacteria</i> |
| Otu1269 | 0.2                                       | 0                              | 0.04              | 0.49                  | 0.06                | 89.65                | unclass. <i>Bacteria</i>            | unclass. <i>Bacteria</i>            | unclass. <i>Bacteria</i>            | unclass. <i>Bacteria</i>       | unclass. <i>Bacteria</i> | <i>Bacteria</i> |
| Otu1271 | 0.2                                       | 0                              | 0.04              | 0.49                  | 0.06                | 89.71                | unclass. <i>Alteromonadales</i>     | unclass. <i>Alteromonadales</i>     | <i>Alteromonadales</i>              | <i>Gammaproteobacteria</i>     | <i>Proteobacteria</i>    | <i>Bacteria</i> |

| OTU                                                 | Av.A <sub>i</sub><br>(pH <i>in situ</i> ) | Av.A <sub>i</sub><br>(pH 7.67) | Av.δ <sub>i</sub> | Av.δ <sub>i</sub> /SD | Av.δ <sub>i</sub> % | ΣAv.δ <sub>i</sub> % | Genus                               | Family                              | Order                               | Class                         | Phylum                   | Domain          |
|-----------------------------------------------------|-------------------------------------------|--------------------------------|-------------------|-----------------------|---------------------|----------------------|-------------------------------------|-------------------------------------|-------------------------------------|-------------------------------|--------------------------|-----------------|
| Otu1272                                             | 0.2                                       | 0                              | 0.04              | 0.49                  | 0.06                | 89.76                | unclass. <i>Bacteria</i>            | unclass. <i>Bacteria</i>            | unclass. <i>Bacteria</i>            | unclass. <i>Bacteria</i>      | unclass. <i>Bacteria</i> | <i>Bacteria</i> |
| Otu1275                                             | 0.2                                       | 0                              | 0.04              | 0.49                  | 0.06                | 89.82                | unclass. <i>Flavobacteriaceae</i>   | <i>Flavobacteriaceae</i>            | <i>Flavobacteriales</i>             | <i>Flavobacteria</i>          | <i>Bacteroidetes</i>     | <i>Bacteria</i> |
| Otu1277                                             | 0.2                                       | 0                              | 0.04              | 0.49                  | 0.06                | 89.88                | unclass. <i>Bacteroidetes</i>       | unclass. <i>Bacteroidetes</i>       | unclass. <i>Bacteroidetes</i>       | unclass. <i>Bacteroidetes</i> | <i>Bacteroidetes</i>     | <i>Bacteria</i> |
| Otu1280                                             | 0.2                                       | 0                              | 0.04              | 0.49                  | 0.06                | 89.94                | unclass. <i>Alphaproteobacteria</i> | unclass. <i>Alphaproteobacteria</i> | unclass. <i>Alphaproteobacteria</i> | <i>Alphaproteobacteria</i>    | <i>Proteobacteria</i>    | <i>Bacteria</i> |
| Otu0002                                             | 0                                         | 0.2                            | 0.04              | 0.49                  | 0.06                | 90                   | unclass. <i>Flavobacteriaceae</i>   | <i>Flavobacteriaceae</i>            | <i>Flavobacteriales</i>             | <i>Flavobacteria</i>          | <i>Bacteroidetes</i>     | <i>Bacteria</i> |
| Winter 'no dilution' (average dissimilarity: 60.9%) |                                           |                                |                   |                       |                     |                      |                                     |                                     |                                     |                               |                          |                 |
| Otu0236                                             | 4.16                                      | 0.2                            | 0.92              | 6.71                  | 1.52                | 1.52                 | unclass. <i>Gammaproteobacteria</i> | unclass. <i>Gammaproteobacteria</i> | unclass. <i>Gammaproteobacteria</i> | <i>Gammaproteobacteria</i>    | <i>Proteobacteria</i>    | <i>Bacteria</i> |
| Otu0041                                             | 4.85                                      | 1.09                           | 0.89              | 2.32                  | 1.46                | 2.97                 | <i>Sulfitobacter</i>                | <i>Rhodobacteraceae</i>             | <i>Rhodobacterales</i>              | <i>Alphaproteobacteria</i>    | <i>Proteobacteria</i>    | <i>Bacteria</i> |
| Otu0139                                             | 4.22                                      | 5.78                           | 0.7               | 1.47                  | 1.15                | 4.12                 | unclass. <i>Gammaproteobacteria</i> | unclass. <i>Gammaproteobacteria</i> | unclass. <i>Gammaproteobacteria</i> | <i>Gammaproteobacteria</i>    | <i>Proteobacteria</i>    | <i>Bacteria</i> |
| Otu1692                                             | 0.77                                      | 3.71                           | 0.69              | 2.39                  | 1.13                | 5.25                 | unclass. <i>Rhodobacteraceae</i>    | <i>Rhodobacteraceae</i>             | <i>Rhodobacterales</i>              | <i>Alphaproteobacteria</i>    | <i>Proteobacteria</i>    | <i>Bacteria</i> |
| Otu0572                                             | 2.33                                      | 1.93                           | 0.63              | 1.22                  | 1.03                | 6.28                 | <i>Croceibacter</i>                 | <i>Flavobacteriaceae</i>            | <i>Flavobacteriales</i>             | <i>Flavobacteria</i>          | <i>Bacteroidetes</i>     | <i>Bacteria</i> |
| Otu0409                                             | 2.38                                      | 0.69                           | 0.6               | 0.78                  | 0.98                | 7.26                 | unclass. <i>Flavobacteriales</i>    | unclass. <i>Flavobacteriales</i>    | <i>Flavobacteriales</i>             | <i>Flavobacteria</i>          | <i>Bacteroidetes</i>     | <i>Bacteria</i> |
| Otu0055                                             | 3.73                                      | 6.14                           | 0.57              | 1.57                  | 0.93                | 8.19                 | <i>Colwellia</i>                    | <i>Colwelliaceae</i>                | <i>Alteromonadales</i>              | <i>Gammaproteobacteria</i>    | <i>Proteobacteria</i>    | <i>Bacteria</i> |
| Otu1283                                             | 4.37                                      | 2.5                            | 0.52              | 1.68                  | 0.86                | 9.05                 | <i>Croceibacter</i>                 | <i>Flavobacteriaceae</i>            | <i>Flavobacteriales</i>             | <i>Flavobacteria</i>          | <i>Bacteroidetes</i>     | <i>Bacteria</i> |
| Otu0366                                             | 1.09                                      | 3.02                           | 0.45              | 2.66                  | 0.74                | 9.79                 | unclass. <i>Saprospiraceae</i>      | <i>Saprospiraceae</i>               | <i>Sphingobacteriales</i>           | <i>Sphingobacteria</i>        | <i>Bacteroidetes</i>     | <i>Bacteria</i> |
| Otu1815                                             | 5.57                                      | 4.03                           | 0.45              | 1.44                  | 0.74                | 10.53                | unclass. <i>Flavobacteriales</i>    | unclass. <i>Flavobacteriales</i>    | <i>Flavobacteriales</i>             | <i>Flavobacteria</i>          | <i>Bacteroidetes</i>     | <i>Bacteria</i> |
| Otu1694                                             | 2.94                                      | 1.78                           | 0.39              | 1.23                  | 0.64                | 11.17                | unclass. <i>Flavobacteriales</i>    | unclass. <i>Flavobacteriales</i>    | <i>Flavobacteriales</i>             | <i>Flavobacteria</i>          | <i>Bacteroidetes</i>     | <i>Bacteria</i> |
| Otu0248                                             | 0                                         | 1.62                           | 0.37              | 0.49                  | 0.62                | 11.78                | unclass. <i>Flavobacteriaceae</i>   | <i>Flavobacteriaceae</i>            | <i>Flavobacteriales</i>             | <i>Flavobacteria</i>          | <i>Bacteroidetes</i>     | <i>Bacteria</i> |
| Otu0066                                             | 0.88                                      | 2.32                           | 0.35              | 1.59                  | 0.58                | 12.36                | <i>Granulosicoccus</i>              | <i>Granulosicoccaceae</i>           | <i>Chromatiales</i>                 | <i>Gammaproteobacteria</i>    | <i>Proteobacteria</i>    | <i>Bacteria</i> |
| Otu0469                                             | 1.92                                      | 3.36                           | 0.34              | 1.65                  | 0.56                | 12.92                | unclass. <i>Bacteria</i>            | unclass. <i>Bacteria</i>            | unclass. <i>Bacteria</i>            | unclass. <i>Bacteria</i>      | unclass. <i>Bacteria</i> | <i>Bacteria</i> |
| Otu0113                                             | 1.91                                      | 0.8                            | 0.34              | 1.67                  | 0.55                | 13.47                | <i>Colwellia</i>                    | <i>Colwelliaceae</i>                | <i>Alteromonadales</i>              | <i>Gammaproteobacteria</i>    | <i>Proteobacteria</i>    | <i>Bacteria</i> |
| Otu1931                                             | 0.2                                       | 1.4                            | 0.34              | 0.85                  | 0.55                | 14.02                | unclass. <i>Bacteria</i>            | unclass. <i>Bacteria</i>            | unclass. <i>Bacteria</i>            | unclass. <i>Bacteria</i>      | unclass. <i>Bacteria</i> | <i>Bacteria</i> |
| Otu0134                                             | 4.57                                      | 3.58                           | 0.31              | 1.38                  | 0.5                 | 14.52                | unclass. <i>Gammaproteobacteria</i> | unclass. <i>Gammaproteobacteria</i> | unclass. <i>Gammaproteobacteria</i> | <i>Gammaproteobacteria</i>    | <i>Proteobacteria</i>    | <i>Bacteria</i> |
| Otu0341                                             | 0.28                                      | 1.38                           | 0.28              | 1.56                  | 0.46                | 14.99                | unclass. <i>Gammaproteobacteria</i> | unclass. <i>Gammaproteobacteria</i> | unclass. <i>Gammaproteobacteria</i> | <i>Gammaproteobacteria</i>    | <i>Proteobacteria</i>    | <i>Bacteria</i> |
| Otu0122                                             | 1.58                                      | 0.68                           | 0.28              | 1.5                   | 0.46                | 15.45                | <i>Glaciecola</i>                   | <i>Alteromonadaceae</i>             | <i>Alteromonadales</i>              | <i>Gammaproteobacteria</i>    | <i>Proteobacteria</i>    | <i>Bacteria</i> |
| Otu0164                                             | 1.94                                      | 0.93                           | 0.27              | 1.49                  | 0.45                | 15.9                 | <i>Croceibacter</i>                 | <i>Flavobacteriaceae</i>            | <i>Flavobacteriales</i>             | <i>Flavobacteria</i>          | <i>Bacteroidetes</i>     | <i>Bacteria</i> |
| Otu0160                                             | 3.51                                      | 3.81                           | 0.27              | 1.38                  | 0.45                | 16.35                | <i>Colwellia</i>                    | <i>Colwelliaceae</i>                | <i>Alteromonadales</i>              | <i>Gammaproteobacteria</i>    | <i>Proteobacteria</i>    | <i>Bacteria</i> |

| OTU     | Av.A <sub>i</sub><br>(pH <i>in situ</i> ) | Av.A <sub>i</sub><br>(pH 7.67) | Av.δ <sub>i</sub> | Av.δ <sub>i</sub> /SD | Av.δ <sub>i</sub> % | ΣAv.δ <sub>i</sub> % | Genus                               | Family                              | Order                               | Class                      | Phylum                   | Domain          |
|---------|-------------------------------------------|--------------------------------|-------------------|-----------------------|---------------------|----------------------|-------------------------------------|-------------------------------------|-------------------------------------|----------------------------|--------------------------|-----------------|
| Otu0143 | 1.28                                      | 0.2                            | 0.27              | 1.51                  | 0.45                | 16.79                | unclass. <i>Gammaproteobacteria</i> | unclass. <i>Gammaproteobacteria</i> | unclass. <i>Gammaproteobacteria</i> | <i>Gammaproteobacteria</i> | <i>Proteobacteria</i>    | <i>Bacteria</i> |
| Otu0044 | 1.35                                      | 0.2                            | 0.27              | 1.92                  | 0.44                | 17.23                | unclass. <i>Gammaproteobacteria</i> | unclass. <i>Gammaproteobacteria</i> | unclass. <i>Gammaproteobacteria</i> | <i>Gammaproteobacteria</i> | <i>Proteobacteria</i>    | <i>Bacteria</i> |
| Otu0062 | 0.95                                      | 1.17                           | 0.26              | 1.28                  | 0.43                | 17.67                | <i>Haliea</i>                       | <i>Alteromonadaceae</i>             | <i>Alteromonadales</i>              | <i>Gammaproteobacteria</i> | <i>Proteobacteria</i>    | <i>Bacteria</i> |
| Otu1720 | 1.86                                      | 1.22                           | 0.26              | 1.35                  | 0.42                | 18.09                | unclass. <i>Bacteria</i>            | unclass. <i>Bacteria</i>            | unclass. <i>Bacteria</i>            | unclass. <i>Bacteria</i>   | unclass. <i>Bacteria</i> | <i>Bacteria</i> |
| Otu0753 | 0                                         | 1.09                           | 0.26              | 1.06                  | 0.42                | 18.51                | unclass. <i>Flavobacteriales</i>    | unclass. <i>Flavobacteriales</i>    | <i>Flavobacteriales</i>             | <i>Flavobacteria</i>       | <i>Bacteroidetes</i>     | <i>Bacteria</i> |
| Otu0047 | 2.51                                      | 3.28                           | 0.25              | 1.46                  | 0.42                | 18.93                | unclass. <i>Rhodobacteraceae</i>    | <i>Rhodobacteraceae</i>             | <i>Rhodobacterales</i>              | <i>Alphaproteobacteria</i> | <i>Proteobacteria</i>    | <i>Bacteria</i> |
| Otu0026 | 0.68                                      | 1.22                           | 0.25              | 1.41                  | 0.42                | 19.34                | unclass. <i>Rhodobacteraceae</i>    | <i>Rhodobacteraceae</i>             | <i>Rhodobacterales</i>              | <i>Alphaproteobacteria</i> | <i>Proteobacteria</i>    | <i>Bacteria</i> |
| Otu1828 | 0.6                                       | 1.09                           | 0.25              | 1.15                  | 0.41                | 19.75                | unclass. <i>Chromatiales</i>        | unclass. <i>Chromatiales</i>        | <i>Chromatiales</i>                 | <i>Gammaproteobacteria</i> | <i>Proteobacteria</i>    | <i>Bacteria</i> |
| Otu0052 | 1.38                                      | 1.66                           | 0.25              | 1.91                  | 0.4                 | 20.15                | unclass. <i>Betaproteobacteria</i>  | unclass. <i>Betaproteobacteria</i>  | unclass. <i>Betaproteobacteria</i>  | <i>Betaproteobacteria</i>  | <i>Proteobacteria</i>    | <i>Bacteria</i> |
| Otu0267 | 0.28                                      | 1.23                           | 0.24              | 2.23                  | 0.4                 | 20.56                | unclass. <i>Flavobacteriaceae</i>   | <i>Flavobacteriaceae</i>            | <i>Flavobacteriales</i>             | <i>Flavobacteria</i>       | <i>Bacteroidetes</i>     | <i>Bacteria</i> |
| Otu0268 | 1.15                                      | 0.2                            | 0.24              | 1.42                  | 0.4                 | 20.95                | unclass. <i>Flavobacteriaceae</i>   | <i>Flavobacteriaceae</i>            | <i>Flavobacteriales</i>             | <i>Flavobacteria</i>       | <i>Bacteroidetes</i>     | <i>Bacteria</i> |
| Otu0068 | 3.4                                       | 3.42                           | 0.24              | 1.44                  | 0.39                | 21.34                | <i>Pelagibacter</i>                 | SAR11-clade                         | <i>Rickettsiales</i>                | <i>Alphaproteobacteria</i> | <i>Proteobacteria</i>    | <i>Bacteria</i> |
| Otu0002 | 1.11                                      | 0.2                            | 0.23              | 1.59                  | 0.38                | 21.72                | unclass. <i>Flavobacteriaceae</i>   | <i>Flavobacteriaceae</i>            | <i>Flavobacteriales</i>             | <i>Flavobacteria</i>       | <i>Bacteroidetes</i>     | <i>Bacteria</i> |
| Otu0124 | 1.51                                      | 1.01                           | 0.23              | 1.59                  | 0.38                | 22.1                 | <i>Loktanelia</i>                   | <i>Rhodobacteraceae</i>             | <i>Rhodobacterales</i>              | <i>Alphaproteobacteria</i> | <i>Proteobacteria</i>    | <i>Bacteria</i> |
| Otu0001 | 1.91                                      | 1.24                           | 0.23              | 1.36                  | 0.38                | 22.48                | unclass. <i>Flavobacteriaceae</i>   | <i>Flavobacteriaceae</i>            | <i>Flavobacteriales</i>             | <i>Flavobacteria</i>       | <i>Bacteroidetes</i>     | <i>Bacteria</i> |
| Otu0269 | 0.99                                      | 0                              | 0.23              | 1.08                  | 0.38                | 22.86                | unclass. <i>Gammaproteobacteria</i> | unclass. <i>Gammaproteobacteria</i> | unclass. <i>Gammaproteobacteria</i> | <i>Gammaproteobacteria</i> | <i>Proteobacteria</i>    | <i>Bacteria</i> |
| Otu1822 | 2.52                                      | 1.87                           | 0.23              | 0.97                  | 0.37                | 23.23                | unclass. <i>Flavobacteriales</i>    | unclass. <i>Flavobacteriales</i>    | <i>Flavobacteriales</i>             | <i>Flavobacteria</i>       | <i>Bacteroidetes</i>     | <i>Bacteria</i> |
| Otu0118 | 1.04                                      | 0.48                           | 0.23              | 1.18                  | 0.37                | 23.61                | <i>Colwellia</i>                    | <i>Colwelliaceae</i>                | <i>Alteromonadales</i>              | <i>Gammaproteobacteria</i> | <i>Proteobacteria</i>    | <i>Bacteria</i> |
| Otu0025 | 0.75                                      | 1                              | 0.23              | 1.57                  | 0.37                | 23.98                | <i>Polaribacter</i>                 | <i>Flavobacteriaceae</i>            | <i>Flavobacteriales</i>             | <i>Flavobacteria</i>       | <i>Bacteroidetes</i>     | <i>Bacteria</i> |
| Otu0713 | 0.2                                       | 1.17                           | 0.23              | 2.12                  | 0.37                | 24.35                | unclass. <i>Bacteria</i>            | unclass. <i>Bacteria</i>            | unclass. <i>Bacteria</i>            | unclass. <i>Bacteria</i>   | unclass. <i>Bacteria</i> | <i>Bacteria</i> |
| Otu0261 | 1.51                                      | 1.66                           | 0.22              | 1.37                  | 0.37                | 24.72                | <i>Winogradskyella</i>              | <i>Flavobacteriaceae</i>            | <i>Flavobacteriales</i>             | <i>Flavobacteria</i>       | <i>Bacteroidetes</i>     | <i>Bacteria</i> |
| Otu0163 | 1.87                                      | 1.46                           | 0.22              | 1.46                  | 0.37                | 25.08                | unclass. <i>Gammaproteobacteria</i> | unclass. <i>Gammaproteobacteria</i> | unclass. <i>Gammaproteobacteria</i> | <i>Gammaproteobacteria</i> | <i>Proteobacteria</i>    | <i>Bacteria</i> |
| Otu0213 | 0.2                                       | 1.05                           | 0.22              | 1.6                   | 0.36                | 25.44                | unclass. <i>Gammaproteobacteria</i> | unclass. <i>Gammaproteobacteria</i> | unclass. <i>Gammaproteobacteria</i> | <i>Gammaproteobacteria</i> | <i>Proteobacteria</i>    | <i>Bacteria</i> |
| Otu1937 | 0                                         | 0.91                           | 0.22              | 1.19                  | 0.35                | 25.8                 | unclass. <i>Gammaproteobacteria</i> | unclass. <i>Gammaproteobacteria</i> | unclass. <i>Gammaproteobacteria</i> | <i>Gammaproteobacteria</i> | <i>Proteobacteria</i>    | <i>Bacteria</i> |
| Otu0022 | 1.34                                      | 1.09                           | 0.21              | 1.36                  | 0.35                | 26.15                | unclass. <i>Betaproteobacteria</i>  | unclass. <i>Betaproteobacteria</i>  | unclass. <i>Betaproteobacteria</i>  | <i>Betaproteobacteria</i>  | <i>Proteobacteria</i>    | <i>Bacteria</i> |
| Otu0621 | 0                                         | 0.88                           | 0.21              | 1.85                  | 0.34                | 26.49                | <i>Colwellia</i>                    | <i>Colwelliaceae</i>                | <i>Alteromonadales</i>              | <i>Gammaproteobacteria</i> | <i>Proteobacteria</i>    | <i>Bacteria</i> |
| Otu1146 | 1.58                                      | 0.83                           | 0.2               | 1.27                  | 0.33                | 26.82                | <i>Nitrosospira</i>                 | <i>Nitrosomonadaceae</i>            | <i>Nitrosomonadales</i>             | <i>Betaproteobacteria</i>  | <i>Proteobacteria</i>    | <i>Bacteria</i> |

| OTU     | Av.A <sub>i</sub><br>(pH <i>in situ</i> ) | Av.A <sub>i</sub><br>(pH 7.67) | Av.δ <sub>i</sub> | Av.δ <sub>i</sub> /SD | Av.δ <sub>i</sub> % | ΣAv.δ <sub>i</sub> % | Genus                               | Family                              | Order                               | Class                         | Phylum                   | Domain          |
|---------|-------------------------------------------|--------------------------------|-------------------|-----------------------|---------------------|----------------------|-------------------------------------|-------------------------------------|-------------------------------------|-------------------------------|--------------------------|-----------------|
| Otu0005 | 2.51                                      | 2.76                           | 0.2               | 1.11                  | 0.33                | 27.15                | <i>Pelagibacter</i>                 | SAR11-clade                         | <i>Rickettsiales</i>                | <i>Alphaproteobacteria</i>    | <i>Proteobacteria</i>    | <i>Bacteria</i> |
| Otu0013 | 1.09                                      | 1.35                           | 0.2               | 1.52                  | 0.33                | 27.49                | unclass. <i>Flavobacteriaceae</i>   | <i>Flavobacteriaceae</i>            | <i>Flavobacteriales</i>             | <i>Flavobacteria</i>          | <i>Bacteroidetes</i>     | <i>Bacteria</i> |
| Otu0032 | 1.79                                      | 1.03                           | 0.2               | 1.39                  | 0.33                | 27.81                | unclass. <i>Gammaproteobacteria</i> | unclass. <i>Gammaproteobacteria</i> | unclass. <i>Gammaproteobacteria</i> | <i>Gammaproteobacteria</i>    | <i>Proteobacteria</i>    | <i>Bacteria</i> |
| Otu0094 | 0.4                                       | 1.09                           | 0.2               | 1.33                  | 0.33                | 28.14                | unclass. <i>Flavobacteriaceae</i>   | <i>Flavobacteriaceae</i>            | <i>Flavobacteriales</i>             | <i>Flavobacteria</i>          | <i>Bacteroidetes</i>     | <i>Bacteria</i> |
| Otu0010 | 7.33                                      | 6.83                           | 0.2               | 1.39                  | 0.32                | 28.46                | unclass. <i>Flavobacteriaceae</i>   | <i>Flavobacteriaceae</i>            | <i>Flavobacteriales</i>             | <i>Flavobacteria</i>          | <i>Bacteroidetes</i>     | <i>Bacteria</i> |
| Otu1923 | 0.2                                       | 0.79                           | 0.19              | 0.92                  | 0.32                | 28.78                | unclass. <i>Bacteria</i>            | unclass. <i>Bacteria</i>            | unclass. <i>Bacteria</i>            | unclass. <i>Bacteria</i>      | unclass. <i>Bacteria</i> | <i>Bacteria</i> |
| Otu0046 | 0.95                                      | 0.2                            | 0.19              | 1.4                   | 0.32                | 29.09                | unclass. <i>Flavobacteriaceae</i>   | <i>Flavobacteriaceae</i>            | <i>Flavobacteriales</i>             | <i>Flavobacteria</i>          | <i>Bacteroidetes</i>     | <i>Bacteria</i> |
| Otu1081 | 0.82                                      | 0                              | 0.19              | 0.49                  | 0.31                | 29.41                | unclass. <i>Flavobacteriales</i>    | unclass. <i>Flavobacteriales</i>    | <i>Flavobacteriales</i>             | <i>Flavobacteria</i>          | <i>Bacteroidetes</i>     | <i>Bacteria</i> |
| Otu0282 | 0.4                                       | 0.68                           | 0.19              | 1.27                  | 0.31                | 29.72                | <i>Haliea</i>                       | <i>Alteromonadaceae</i>             | <i>Alteromonadales</i>              | <i>Gammaproteobacteria</i>    | <i>Proteobacteria</i>    | <i>Bacteria</i> |
| Otu0156 | 0.2                                       | 0.85                           | 0.19              | 1.03                  | 0.31                | 30.03                | unclass. <i>Gammaproteobacteria</i> | unclass. <i>Gammaproteobacteria</i> | unclass. <i>Gammaproteobacteria</i> | <i>Gammaproteobacteria</i>    | <i>Proteobacteria</i>    | <i>Bacteria</i> |
| Otu0369 | 0.8                                       | 0                              | 0.19              | 1.96                  | 0.3                 | 30.33                | unclass. <i>Deltaproteobacteria</i> | unclass. <i>Deltaproteobacteria</i> | unclass. <i>Deltaproteobacteria</i> | <i>Deltaproteobacteria</i>    | <i>Proteobacteria</i>    | <i>Bacteria</i> |
| Otu0076 | 1.63                                      | 1.64                           | 0.18              | 1.18                  | 0.3                 | 30.63                | unclass. <i>Flammeovirgaceae</i>    | <i>Flammeovirgaceae</i>             | <i>Sphingobacteriales</i>           | <i>Sphingobacteria</i>        | <i>Bacteroidetes</i>     | <i>Bacteria</i> |
| Otu0035 | 1.78                                      | 2.06                           | 0.18              | 1.41                  | 0.3                 | 30.93                | <i>Colwellia</i>                    | <i>Colwelliaceae</i>                | <i>Alteromonadales</i>              | <i>Gammaproteobacteria</i>    | <i>Proteobacteria</i>    | <i>Bacteria</i> |
| Otu0140 | 1.09                                      | 0.77                           | 0.18              | 1.27                  | 0.3                 | 31.23                | <i>Oleispira</i>                    | <i>Oceanospirillaceae</i>           | <i>Oceanospirillales</i>            | <i>Gammaproteobacteria</i>    | <i>Proteobacteria</i>    | <i>Bacteria</i> |
| Otu0036 | 0.77                                      | 0                              | 0.18              | 1.16                  | 0.3                 | 31.52                | <i>Glaciecola</i>                   | <i>Alteromonadaceae</i>             | <i>Alteromonadales</i>              | <i>Gammaproteobacteria</i>    | <i>Proteobacteria</i>    | <i>Bacteria</i> |
| Otu0170 | 0.88                                      | 0.2                            | 0.18              | 1.44                  | 0.29                | 31.82                | unclass. <i>Bacteria</i>            | unclass. <i>Bacteria</i>            | unclass. <i>Bacteria</i>            | unclass. <i>Bacteria</i>      | unclass. <i>Bacteria</i> | <i>Bacteria</i> |
| Otu0508 | 0.28                                      | 0.8                            | 0.18              | 1.83                  | 0.29                | 32.11                | unclass. <i>Flavobacteriales</i>    | unclass. <i>Flavobacteriales</i>    | <i>Flavobacteriales</i>             | <i>Flavobacteria</i>          | <i>Bacteroidetes</i>     | <i>Bacteria</i> |
| Otu0042 | 0.2                                       | 0.88                           | 0.18              | 1.46                  | 0.29                | 32.4                 | <i>Rhodococcus</i>                  | <i>Nocardiaceae</i>                 | <i>Actinomycetales</i>              | <i>Actinobacteria</i>         | <i>Actinobacteria</i>    | <i>Bacteria</i> |
| Otu1837 | 0.88                                      | 0.2                            | 0.18              | 1.45                  | 0.29                | 32.69                | unclass. <i>Flavobacteriales</i>    | unclass. <i>Flavobacteriales</i>    | <i>Flavobacteriales</i>             | <i>Flavobacteria</i>          | <i>Bacteroidetes</i>     | <i>Bacteria</i> |
| Otu1723 | 1.08                                      | 0.77                           | 0.18              | 1.21                  | 0.29                | 32.99                | unclass. <i>Bacteroidetes</i>       | unclass. <i>Bacteroidetes</i>       | unclass. <i>Bacteroidetes</i>       | unclass. <i>Bacteroidetes</i> | <i>Bacteroidetes</i>     | <i>Bacteria</i> |
| Otu0232 | 0.89                                      | 0.88                           | 0.18              | 1.44                  | 0.29                | 33.27                | unclass. <i>Rhodobacteraceae</i>    | <i>Rhodobacteraceae</i>             | <i>Rhodobacterales</i>              | <i>Alphaproteobacteria</i>    | <i>Proteobacteria</i>    | <i>Bacteria</i> |
| Otu0012 | 1.49                                      | 1.91                           | 0.17              | 1.24                  | 0.28                | 33.56                | unclass. <i>Comamonadaceae</i>      | <i>Comamonadaceae</i>               | <i>Burkholderiales</i>              | <i>Betaproteobacteria</i>     | <i>Proteobacteria</i>    | <i>Bacteria</i> |
| Otu0216 | 0.63                                      | 0.57                           | 0.17              | 0.99                  | 0.28                | 33.84                | <i>Pelagibacter</i>                 | SAR11-clade                         | <i>Rickettsiales</i>                | <i>Alphaproteobacteria</i>    | <i>Proteobacteria</i>    | <i>Bacteria</i> |
| Otu0333 | 0.48                                      | 0.75                           | 0.17              | 1.16                  | 0.27                | 34.12                | unclass. <i>Gammaproteobacteria</i> | unclass. <i>Gammaproteobacteria</i> | unclass. <i>Gammaproteobacteria</i> | <i>Gammaproteobacteria</i>    | <i>Proteobacteria</i>    | <i>Bacteria</i> |
| Otu0117 | 0.4                                       | 0.63                           | 0.16              | 1.11                  | 0.27                | 34.39                | <i>Arcobacter</i>                   | <i>Campylobacteraceae</i>           | <i>Campylobacterales</i>            | <i>Epsilonproteobacteria</i>  | <i>Proteobacteria</i>    | <i>Bacteria</i> |
| Otu0521 | 0.68                                      | 0.57                           | 0.16              | 1.19                  | 0.27                | 34.66                | unclass. <i>Rhodobacteraceae</i>    | <i>Rhodobacteraceae</i>             | <i>Rhodobacterales</i>              | <i>Alphaproteobacteria</i>    | <i>Proteobacteria</i>    | <i>Bacteria</i> |
| Otu0230 | 0.28                                      | 0.6                            | 0.16              | 0.88                  | 0.27                | 34.93                | unclass. <i>Rhodobacteraceae</i>    | <i>Rhodobacteraceae</i>             | <i>Rhodobacterales</i>              | <i>Alphaproteobacteria</i>    | <i>Proteobacteria</i>    | <i>Bacteria</i> |

| OTU     | Av.A <sub>i</sub><br>(pH <i>in situ</i> ) | Av.A <sub>i</sub><br>(pH 7.67) | Av.δ <sub>i</sub> | Av.δ <sub>i</sub> /SD | Av.δ <sub>i</sub> % | ΣAv.δ <sub>i</sub> % | Genus                               | Family                              | Order                               | Class                          | Phylum                   | Domain          |
|---------|-------------------------------------------|--------------------------------|-------------------|-----------------------|---------------------|----------------------|-------------------------------------|-------------------------------------|-------------------------------------|--------------------------------|--------------------------|-----------------|
| Otu0270 | 1.55                                      | 1.03                           | 0.16              | 1.21                  | 0.27                | 35.19                | unclass. <i>Bacteroidetes</i>       | unclass. <i>Bacteroidetes</i>       | unclass. <i>Bacteroidetes</i>       | unclass. <i>Bacteroidetes</i>  | <i>Bacteroidetes</i>     | <i>Bacteria</i> |
| Otu1821 | 0.68                                      | 0.28                           | 0.16              | 1.16                  | 0.27                | 35.46                | unclass. <i>Bacteroidetes</i>       | unclass. <i>Bacteroidetes</i>       | unclass. <i>Bacteroidetes</i>       | unclass. <i>Bacteroidetes</i>  | <i>Bacteroidetes</i>     | <i>Bacteria</i> |
| Otu0172 | 0.48                                      | 0.88                           | 0.16              | 1.3                   | 0.27                | 35.73                | unclass. <i>Gammaproteobacteria</i> | unclass. <i>Gammaproteobacteria</i> | unclass. <i>Gammaproteobacteria</i> | <i>Gammaproteobacteria</i>     | <i>Proteobacteria</i>    | <i>Bacteria</i> |
| Otu1629 | 0.68                                      | 0.28                           | 0.16              | 1.17                  | 0.27                | 35.99                | unclass. <i>Flammeovirgaceae</i>    | <i>Flammeovirgaceae</i>             | <i>Sphingobacteriales</i>           | <i>Sphingobacteria</i>         | <i>Bacteroidetes</i>     | <i>Bacteria</i> |
| Otu0272 | 0.4                                       | 0.6                            | 0.16              | 0.98                  | 0.26                | 36.26                | unclass. <i>Flavobacteriaceae</i>   | <i>Flavobacteriaceae</i>            | <i>Flavobacteriales</i>             | <i>Flavobacteria</i>           | <i>Bacteroidetes</i>     | <i>Bacteria</i> |
| Otu0313 | 0                                         | 0.68                           | 0.16              | 1.16                  | 0.26                | 36.52                | unclass. <i>Gammaproteobacteria</i> | unclass. <i>Gammaproteobacteria</i> | unclass. <i>Gammaproteobacteria</i> | <i>Gammaproteobacteria</i>     | <i>Proteobacteria</i>    | <i>Bacteria</i> |
| Otu0203 | 0.88                                      | 0.83                           | 0.16              | 1.31                  | 0.26                | 36.78                | <i>Pelagibacter</i>                 | SAR11-clade                         | <i>Rickettsiales</i>                | <i>Alphaproteobacteria</i>     | <i>Proteobacteria</i>    | <i>Bacteria</i> |
| Otu0348 | 0.8                                       | 0.2                            | 0.16              | 1.43                  | 0.26                | 37.05                | unclass. <i>Flavobacteriaceae</i>   | <i>Flavobacteriaceae</i>            | <i>Flavobacteriales</i>             | <i>Flavobacteria</i>           | <i>Bacteroidetes</i>     | <i>Bacteria</i> |
| Otu0337 | 0.2                                       | 0.63                           | 0.16              | 0.93                  | 0.26                | 37.3                 | unclass. <i>Bacteria</i>            | unclass. <i>Bacteria</i>            | unclass. <i>Bacteria</i>            | unclass. <i>Bacteria</i>       | unclass. <i>Bacteria</i> | <i>Bacteria</i> |
| Otu0190 | 0.2                                       | 0.63                           | 0.16              | 0.93                  | 0.26                | 37.56                | unclass. <i>Proteobacteria</i>      | unclass. <i>Proteobacteria</i>      | unclass. <i>Proteobacteria</i>      | unclass. <i>Proteobacteria</i> | <i>Proteobacteria</i>    | <i>Bacteria</i> |
| Otu0262 | 1.17                                      | 1.29                           | 0.16              | 1.63                  | 0.25                | 37.81                | unclass. <i>Gammaproteobacteria</i> | unclass. <i>Gammaproteobacteria</i> | unclass. <i>Gammaproteobacteria</i> | <i>Gammaproteobacteria</i>     | <i>Proteobacteria</i>    | <i>Bacteria</i> |
| Otu1848 | 0.48                                      | 0.68                           | 0.15              | 1.14                  | 0.25                | 38.07                | unclass. <i>Gammaproteobacteria</i> | unclass. <i>Gammaproteobacteria</i> | unclass. <i>Gammaproteobacteria</i> | <i>Gammaproteobacteria</i>     | <i>Proteobacteria</i>    | <i>Bacteria</i> |
| Otu0051 | 0.6                                       | 0.28                           | 0.15              | 1.26                  | 0.25                | 38.31                | unclass. <i>Flavobacteriaceae</i>   | <i>Flavobacteriaceae</i>            | <i>Flavobacteriales</i>             | <i>Flavobacteria</i>           | <i>Bacteroidetes</i>     | <i>Bacteria</i> |
| Otu1920 | 0.28                                      | 0.6                            | 0.15              | 1.27                  | 0.25                | 38.56                | unclass. <i>Gammaproteobacteria</i> | unclass. <i>Gammaproteobacteria</i> | unclass. <i>Gammaproteobacteria</i> | <i>Gammaproteobacteria</i>     | <i>Proteobacteria</i>    | <i>Bacteria</i> |
| Otu0359 | 0.2                                       | 0.68                           | 0.15              | 1.13                  | 0.25                | 38.81                | unclass. <i>Gammaproteobacteria</i> | unclass. <i>Gammaproteobacteria</i> | unclass. <i>Gammaproteobacteria</i> | <i>Gammaproteobacteria</i>     | <i>Proteobacteria</i>    | <i>Bacteria</i> |
| Otu1119 | 0.48                                      | 0.8                            | 0.15              | 1.35                  | 0.25                | 39.06                | unclass. <i>Bacteroidetes</i>       | unclass. <i>Bacteroidetes</i>       | unclass. <i>Bacteroidetes</i>       | unclass. <i>Bacteroidetes</i>  | <i>Bacteroidetes</i>     | <i>Bacteria</i> |
| Otu1873 | 0.68                                      | 0.2                            | 0.15              | 1.13                  | 0.25                | 39.3                 | unclass. <i>Bacteria</i>            | unclass. <i>Bacteria</i>            | unclass. <i>Bacteria</i>            | unclass. <i>Bacteria</i>       | unclass. <i>Bacteria</i> | <i>Bacteria</i> |
| Otu0133 | 0.97                                      | 0.68                           | 0.15              | 1.12                  | 0.24                | 39.54                | <i>Colwellia</i>                    | <i>Colwelliaceae</i>                | <i>Alteromonadales</i>              | <i>Gammaproteobacteria</i>     | <i>Proteobacteria</i>    | <i>Bacteria</i> |
| Otu0290 | 0.55                                      | 0.4                            | 0.15              | 1.01                  | 0.24                | 39.78                | unclass. <i>Flavobacteriaceae</i>   | <i>Flavobacteriaceae</i>            | <i>Flavobacteriales</i>             | <i>Flavobacteria</i>           | <i>Bacteroidetes</i>     | <i>Bacteria</i> |
| Otu0009 | 0.97                                      | 1                              | 0.14              | 1.14                  | 0.24                | 40.02                | unclass. <i>Rhodobacteraceae</i>    | <i>Rhodobacteraceae</i>             | <i>Rhodobacterales</i>              | <i>Alphaproteobacteria</i>     | <i>Proteobacteria</i>    | <i>Bacteria</i> |
| Otu0673 | 0.48                                      | 0.48                           | 0.14              | 1                     | 0.23                | 40.25                | <i>Thalassolituus</i>               | <i>Oceanospirillaceae</i>           | <i>Oceanospirillales</i>            | <i>Gammaproteobacteria</i>     | <i>Proteobacteria</i>    | <i>Bacteria</i> |
| Otu0878 | 0                                         | 0.6                            | 0.14              | 1.2                   | 0.23                | 40.48                | unclass. <i>Bacteria</i>            | unclass. <i>Bacteria</i>            | unclass. <i>Bacteria</i>            | unclass. <i>Bacteria</i>       | unclass. <i>Bacteria</i> | <i>Bacteria</i> |
| Otu1057 | 0                                         | 0.6                            | 0.14              | 1.2                   | 0.23                | 40.72                | unclass. <i>Gammaproteobacteria</i> | unclass. <i>Gammaproteobacteria</i> | unclass. <i>Gammaproteobacteria</i> | <i>Gammaproteobacteria</i>     | <i>Proteobacteria</i>    | <i>Bacteria</i> |
| Otu0072 | 0.48                                      | 0.6                            | 0.14              | 1.17                  | 0.23                | 40.95                | <i>Sulfitobacter</i>                | <i>Rhodobacteraceae</i>             | <i>Rhodobacterales</i>              | <i>Alphaproteobacteria</i>     | <i>Proteobacteria</i>    | <i>Bacteria</i> |
| Otu0173 | 0.55                                      | 0.2                            | 0.14              | 0.87                  | 0.23                | 41.17                | unclass. <i>Alteromonadaceae</i>    | <i>Alteromonadaceae</i>             | <i>Alteromonadales</i>              | <i>Gammaproteobacteria</i>     | <i>Proteobacteria</i>    | <i>Bacteria</i> |
| Otu0413 | 0.35                                      | 0.4                            | 0.14              | 0.93                  | 0.22                | 41.4                 | <i>Eudoraea</i>                     | <i>Flavobacteriaceae</i>            | <i>Flavobacteriales</i>             | <i>Flavobacteria</i>           | <i>Bacteroidetes</i>     | <i>Bacteria</i> |
| Otu0354 | 0.28                                      | 0.48                           | 0.14              | 0.88                  | 0.22                | 41.62                | <i>Andersenella</i>                 | <i>Rhodobiaceae</i>                 | <i>Rhizobiales</i>                  | <i>Alphaproteobacteria</i>     | <i>Proteobacteria</i>    | <i>Bacteria</i> |

| OTU     | Av. A <sub>i</sub><br>(pH <i>in situ</i> ) | Av. A <sub>i</sub><br>(pH 7.67) | Av. δ <sub>i</sub> | Av. δ <sub>i</sub> /SD | Av. δ <sub>i</sub> % | ΣAv. δ <sub>i</sub> % | Genus                               | Family                              | Order                               | Class                          | Phylum                   | Domain                 |
|---------|--------------------------------------------|---------------------------------|--------------------|------------------------|----------------------|-----------------------|-------------------------------------|-------------------------------------|-------------------------------------|--------------------------------|--------------------------|------------------------|
| Otu0056 | 1.39                                       | 0.95                            | 0.14               | 1.23                   | 0.22                 | 41.84                 | unclass. <i>Gammaproteobacteria</i> | unclass. <i>Gammaproteobacteria</i> | unclass. <i>Gammaproteobacteria</i> | <i>Gammaproteobacteria</i>     | <i>Proteobacteria</i>    | <i>Bacteria</i>        |
| Otu1159 | 0                                          | 0.57                            | 0.13               | 0.8                    | 0.22                 | 42.06                 | unclass. <i>Gammaproteobacteria</i> | unclass. <i>Gammaproteobacteria</i> | unclass. <i>Gammaproteobacteria</i> | <i>Gammaproteobacteria</i>     | <i>Proteobacteria</i>    | <i>Bacteria</i>        |
| Otu0254 | 0.48                                       | 0.28                            | 0.13               | 0.89                   | 0.22                 | 42.28                 | unclass. <i>Flavobacteriaceae</i>   | <i>Flavobacteriaceae</i>            | <i>Flavobacteriales</i>             | <i>Flavobacteria</i>           | <i>Bacteroidetes</i>     | <i>Bacteria</i>        |
| Otu0696 | 0.4                                        | 0.48                            | 0.13               | 1                      | 0.22                 | 42.5                  | unclass. <i>Flavobacteriaceae</i>   | <i>Flavobacteriaceae</i>            | <i>Flavobacteriales</i>             | <i>Flavobacteria</i>           | <i>Bacteroidetes</i>     | <i>Bacteria</i>        |
| Otu1816 | 0.8                                        | 0.4                             | 0.13               | 1.1                    | 0.22                 | 42.72                 | unclass. <i>Flavobacteriales</i>    | unclass. <i>Flavobacteriales</i>    | <i>Flavobacteriales</i>             | <i>Flavobacteria</i>           | <i>Bacteroidetes</i>     | <i>Bacteria</i>        |
| Otu0121 | 0.2                                        | 0.45                            | 0.13               | 0.66                   | 0.22                 | 42.93                 | unclass. <i>Deltaproteobacteria</i> | unclass. <i>Deltaproteobacteria</i> | unclass. <i>Deltaproteobacteria</i> | <i>Deltaproteobacteria</i>     | <i>Proteobacteria</i>    | <i>Bacteria</i>        |
| Otu0310 | 0.48                                       | 0.4                             | 0.13               | 1.01                   | 0.22                 | 43.15                 | unclass. <i>Bacteria</i>            | unclass. <i>Bacteria</i>            | unclass. <i>Bacteria</i>            | unclass. <i>Bacteria</i>       | unclass. <i>Bacteria</i> | <i>Bacteria</i>        |
| Otu0202 | 0.48                                       | 0.4                             | 0.13               | 1.01                   | 0.22                 | 43.36                 | unclass. <i>Alteromonadaceae</i>    | <i>Alteromonadaceae</i>             | <i>Alteromonadales</i>              | <i>Gammaproteobacteria</i>     | <i>Proteobacteria</i>    | <i>Bacteria</i>        |
| Otu0027 | 0.57                                       | 0                               | 0.13               | 0.8                    | 0.22                 | 43.58                 | <i>Pseudoalteromonas</i>            | <i>Pseudoalteromonadaceae</i>       | <i>Alteromonadales</i>              | <i>Gammaproteobacteria</i>     | <i>Proteobacteria</i>    | <i>Bacteria</i>        |
| Otu0364 | 0.6                                        | 0.2                             | 0.13               | 1.1                    | 0.21                 | 43.79                 | unclass. <i>Flavobacteriaceae</i>   | <i>Flavobacteriaceae</i>            | <i>Flavobacteriales</i>             | <i>Flavobacteria</i>           | <i>Bacteroidetes</i>     | <i>Bacteria</i>        |
| Otu0899 | 0.6                                        | 0.2                             | 0.13               | 1.1                    | 0.21                 | 44.01                 | unclass. <i>Betaproteobacteria</i>  | unclass. <i>Betaproteobacteria</i>  | unclass. <i>Betaproteobacteria</i>  | <i>Betaproteobacteria</i>      | <i>Proteobacteria</i>    | <i>Bacteria</i>        |
| Otu1379 | 0                                          | 0.55                            | 0.13               | 0.75                   | 0.21                 | 44.21                 | unclass. <i>Gammaproteobacteria</i> | unclass. <i>Gammaproteobacteria</i> | unclass. <i>Gammaproteobacteria</i> | <i>Gammaproteobacteria</i>     | <i>Proteobacteria</i>    | <i>Bacteria</i>        |
| Otu0204 | 0.2                                        | 0.48                            | 0.12               | 0.89                   | 0.2                  | 44.42                 | unclass. <i>Colwelliaceae</i>       | <i>Colwelliaceae</i>                | <i>Alteromonadales</i>              | <i>Gammaproteobacteria</i>     | <i>Proteobacteria</i>    | <i>Bacteria</i>        |
| Otu0312 | 0.2                                        | 0.48                            | 0.12               | 0.88                   | 0.2                  | 44.62                 | unclass. <i>Oceanospirillaceae</i>  | <i>Oceanospirillaceae</i>           | <i>Oceanospirillales</i>            | <i>Gammaproteobacteria</i>     | <i>Proteobacteria</i>    | <i>Bacteria</i>        |
| Otu0234 | 0.6                                        | 0.88                            | 0.12               | 0.99                   | 0.2                  | 44.82                 | <i>Arcobacter</i>                   | <i>Campylobacteraceae</i>           | <i>Campylobacterales</i>            | <i>Epsilonproteobacteria</i>   | <i>Proteobacteria</i>    | <i>Bacteria</i>        |
| Otu1820 | 0.2                                        | 0.48                            | 0.12               | 0.89                   | 0.2                  | 45.02                 | <i>Glaciecola</i>                   | <i>Alteromonadaceae</i>             | <i>Alteromonadales</i>              | <i>Gammaproteobacteria</i>     | <i>Proteobacteria</i>    | <i>Bacteria</i>        |
| Otu1223 | 0.2                                        | 0.48                            | 0.12               | 0.89                   | 0.2                  | 45.22                 | unclass. <i>Desulfobulbaceae</i>    | <i>Desulfobulbaceae</i>             | <i>Desulfobacterales</i>            | <i>Deltaproteobacteria</i>     | <i>Proteobacteria</i>    | <i>Bacteria</i>        |
| Otu0169 | 0.6                                        | 0.4                             | 0.12               | 1.02                   | 0.2                  | 45.42                 | unclass. <i>Bacteria</i>            | unclass. <i>Bacteria</i>            | unclass. <i>Bacteria</i>            | unclass. <i>Bacteria</i>       | unclass. <i>Bacteria</i> | <i>Bacteria</i>        |
| Otu1637 | 0.2                                        | 0.48                            | 0.12               | 0.89                   | 0.2                  | 45.62                 | unclass. <i>Proteobacteria</i>      | unclass. <i>Proteobacteria</i>      | unclass. <i>Proteobacteria</i>      | unclass. <i>Proteobacteria</i> | <i>Proteobacteria</i>    | <i>Bacteria</i>        |
| Otu0291 | 1.23                                       | 1.03                            | 0.12               | 1.06                   | 0.19                 | 45.81                 | unclass. <i>Flavobacteriaceae</i>   | <i>Flavobacteriaceae</i>            | <i>Flavobacteriales</i>             | <i>Flavobacteria</i>           | <i>Bacteroidetes</i>     | <i>Bacteria</i>        |
| Otu0037 | 0                                          | 0.48                            | 0.11               | 0.79                   | 0.19                 | 46                    | <i>Marinobacter</i>                 | <i>Alteromonadaceae</i>             | <i>Alteromonadales</i>              | <i>Gammaproteobacteria</i>     | <i>Proteobacteria</i>    | <i>Bacteria</i>        |
| Otu1770 | 0                                          | 0.48                            | 0.11               | 0.79                   | 0.19                 | 46.18                 | unclass. <i>Actinobacteria</i>      | unclass. <i>Actinobacteria</i>      | unclass. <i>Actinobacteria</i>      | <i>Actinobacteria</i>          | <i>Actinobacteria</i>    | <i>Bacteria</i>        |
| Otu2030 | 0                                          | 0.48                            | 0.11               | 0.79                   | 0.19                 | 46.37                 | unclass. <i>Bacteria</i>            | unclass. <i>Bacteria</i>            | unclass. <i>Bacteria</i>            | unclass. <i>Bacteria</i>       | unclass. <i>Bacteria</i> | <i>Bacteria</i>        |
| Otu2029 | 0                                          | 0.48                            | 0.11               | 0.78                   | 0.18                 | 46.56                 | unclass. <i>Bacteria</i>            | unclass. <i>Bacteria</i>            | unclass. <i>Bacteria</i>            | unclass. <i>Bacteria</i>       | unclass. <i>Bacteria</i> | <i>Bacteria</i>        |
| Otu1944 | 0                                          | 0.48                            | 0.11               | 0.78                   | 0.18                 | 46.74                 | unclass. <i>Proteobacteria</i>      | unclass. <i>Proteobacteria</i>      | unclass. <i>Proteobacteria</i>      | unclass. <i>Proteobacteria</i> | <i>Proteobacteria</i>    | <i>Bacteria</i>        |
| Otu0215 | 0                                          | 0.48                            | 0.11               | 0.78                   | 0.18                 | 46.92                 | unclass. <i>Domain</i>              | unclass. <i>Domain</i>              | unclass. <i>Domain</i>              | unclass. <i>Domain</i>         | unclass. <i>Domain</i>   | unclass. <i>Domain</i> |
| Otu0153 | 0.48                                       | 0                               | 0.11               | 0.78                   | 0.18                 | 47.11                 | unclass. <i>Gammaproteobacteria</i> | unclass. <i>Gammaproteobacteria</i> | unclass. <i>Gammaproteobacteria</i> | <i>Gammaproteobacteria</i>     | <i>Proteobacteria</i>    | <i>Bacteria</i>        |



| OTU     | Av.A <sub>i</sub><br>(pH <i>in situ</i> ) | Av.A <sub>i</sub><br>(pH 7.67) | Av.δ <sub>i</sub> | Av.δ <sub>i</sub> /SD | Av.δ <sub>i</sub> % | ΣAv.δ <sub>i</sub> % | Genus                               | Family                              | Order                               | Class                          | Phylum                   | Domain          |
|---------|-------------------------------------------|--------------------------------|-------------------|-----------------------|---------------------|----------------------|-------------------------------------|-------------------------------------|-------------------------------------|--------------------------------|--------------------------|-----------------|
| Otu1897 | 0.2                                       | 0.35                           | 0.11              | 0.68                  | 0.18                | 47.29                | unclass. <i>Flavobacteriaceae</i>   | <i>Flavobacteriaceae</i>            | <i>Flavobacteriales</i>             | <i>Flavobacteria</i>           | <i>Bacteroidetes</i>     | <i>Bacteria</i> |
| Otu0028 | 0.2                                       | 0.35                           | 0.11              | 0.69                  | 0.18                | 47.47                | unclass. <i>Gammaproteobacteria</i> | unclass. <i>Gammaproteobacteria</i> | unclass. <i>Gammaproteobacteria</i> | <i>Gammaproteobacteria</i>     | <i>Proteobacteria</i>    | <i>Bacteria</i> |
| Otu0177 | 1.17                                      | 1.03                           | 0.11              | 1.05                  | 0.18                | 47.65                | <i>Haliea</i>                       | <i>Alteromonadaceae</i>             | <i>Alteromonadales</i>              | <i>Gammaproteobacteria</i>     | <i>Proteobacteria</i>    | <i>Bacteria</i> |
| Otu1111 | 0.45                                      | 0                              | 0.1               | 0.49                  | 0.17                | 47.82                | unclass. <i>Proteobacteria</i>      | unclass. <i>Proteobacteria</i>      | unclass. <i>Proteobacteria</i>      | unclass. <i>Proteobacteria</i> | <i>Proteobacteria</i>    | <i>Bacteria</i> |
| Otu2067 | 0                                         | 0.45                           | 0.1               | 0.49                  | 0.17                | 47.99                | unclass. <i>Bacteria</i>            | unclass. <i>Bacteria</i>            | unclass. <i>Bacteria</i>            | unclass. <i>Bacteria</i>       | unclass. <i>Bacteria</i> | <i>Bacteria</i> |
| Otu0283 | 0.4                                       | 0.2                            | 0.1               | 0.87                  | 0.17                | 48.16                | unclass. <i>Gammaproteobacteria</i> | unclass. <i>Gammaproteobacteria</i> | unclass. <i>Gammaproteobacteria</i> | <i>Gammaproteobacteria</i>     | <i>Proteobacteria</i>    | <i>Bacteria</i> |
| Otu0208 | 0.2                                       | 0.4                            | 0.1               | 0.87                  | 0.17                | 48.33                | unclass. <i>Saprospiraceae</i>      | <i>Saprospiraceae</i>               | <i>Sphingobacteriales</i>           | <i>Sphingobacteria</i>         | <i>Bacteroidetes</i>     | <i>Bacteria</i> |
| Otu1249 | 0.2                                       | 0.4                            | 0.1               | 0.87                  | 0.17                | 48.5                 | unclass. <i>Gammaproteobacteria</i> | unclass. <i>Gammaproteobacteria</i> | unclass. <i>Gammaproteobacteria</i> | <i>Gammaproteobacteria</i>     | <i>Proteobacteria</i>    | <i>Bacteria</i> |
| Otu1861 | 0.4                                       | 0.2                            | 0.1               | 0.87                  | 0.17                | 48.67                | unclass. <i>Gammaproteobacteria</i> | unclass. <i>Gammaproteobacteria</i> | unclass. <i>Gammaproteobacteria</i> | <i>Gammaproteobacteria</i>     | <i>Proteobacteria</i>    | <i>Bacteria</i> |
| Otu0315 | 0.2                                       | 0.4                            | 0.1               | 0.87                  | 0.17                | 48.84                | unclass. <i>Gammaproteobacteria</i> | unclass. <i>Gammaproteobacteria</i> | unclass. <i>Gammaproteobacteria</i> | <i>Gammaproteobacteria</i>     | <i>Proteobacteria</i>    | <i>Bacteria</i> |
| Otu0199 | 0.2                                       | 0.4                            | 0.1               | 0.87                  | 0.17                | 49.01                | unclass. <i>Flavobacteriaceae</i>   | <i>Flavobacteriaceae</i>            | <i>Flavobacteriales</i>             | <i>Flavobacteria</i>           | <i>Bacteroidetes</i>     | <i>Bacteria</i> |
| Otu1836 | 0.4                                       | 0.2                            | 0.1               | 0.87                  | 0.17                | 49.18                | unclass. <i>Bacteroidetes</i>       | unclass. <i>Bacteroidetes</i>       | unclass. <i>Bacteroidetes</i>       | unclass. <i>Bacteroidetes</i>  | <i>Bacteroidetes</i>     | <i>Bacteria</i> |
| Otu0057 | 0.4                                       | 0.2                            | 0.1               | 0.87                  | 0.17                | 49.35                | <i>Ulvibacter</i>                   | <i>Flavobacteriaceae</i>            | <i>Flavobacteriales</i>             | <i>Flavobacteria</i>           | <i>Bacteroidetes</i>     | <i>Bacteria</i> |
| Otu1941 | 0.2                                       | 0.4                            | 0.1               | 0.87                  | 0.17                | 49.52                | <i>Haliea</i>                       | <i>Alteromonadaceae</i>             | <i>Alteromonadales</i>              | <i>Gammaproteobacteria</i>     | <i>Proteobacteria</i>    | <i>Bacteria</i> |
| Otu2098 | 0                                         | 0.45                           | 0.1               | 0.49                  | 0.17                | 49.69                | unclass. <i>Bacteria</i>            | unclass. <i>Bacteria</i>            | unclass. <i>Bacteria</i>            | unclass. <i>Bacteria</i>       | unclass. <i>Bacteria</i> | <i>Bacteria</i> |
| Otu0448 | 0.4                                       | 0.2                            | 0.1               | 0.87                  | 0.17                | 49.86                | unclass. <i>Desulfuromonadaceae</i> | <i>Desulfuromonadaceae</i>          | <i>Desulfuromonadales</i>           | <i>Deltaproteobacteria</i>     | <i>Proteobacteria</i>    | <i>Bacteria</i> |
| Otu1566 | 0.4                                       | 0.2                            | 0.1               | 0.87                  | 0.17                | 50.03                | <i>Gaetbulibacter</i>               | <i>Flavobacteriaceae</i>            | <i>Flavobacteriales</i>             | <i>Flavobacteria</i>           | <i>Bacteroidetes</i>     | <i>Bacteria</i> |
| Otu0356 | 0.4                                       | 0.2                            | 0.1               | 0.87                  | 0.17                | 50.2                 | unclass. <i>Comamonadaceae</i>      | <i>Comamonadaceae</i>               | <i>Burkholderiales</i>              | <i>Betaproteobacteria</i>      | <i>Proteobacteria</i>    | <i>Bacteria</i> |
| Otu0019 | 0.4                                       | 0.2                            | 0.1               | 0.87                  | 0.17                | 50.37                | unclass. <i>Gammaproteobacteria</i> | unclass. <i>Gammaproteobacteria</i> | unclass. <i>Gammaproteobacteria</i> | <i>Gammaproteobacteria</i>     | <i>Proteobacteria</i>    | <i>Bacteria</i> |
| Otu0319 | 0.4                                       | 0.2                            | 0.1               | 0.87                  | 0.17                | 50.54                | unclass. <i>Flammeovirgaceae</i>    | <i>Flammeovirgaceae</i>             | <i>Sphingobacteriales</i>           | <i>Sphingobacteria</i>         | <i>Bacteroidetes</i>     | <i>Bacteria</i> |
| Otu0954 | 0.2                                       | 0.4                            | 0.1               | 0.87                  | 0.17                | 50.7                 | unclass. <i>Gammaproteobacteria</i> | unclass. <i>Gammaproteobacteria</i> | unclass. <i>Gammaproteobacteria</i> | <i>Gammaproteobacteria</i>     | <i>Proteobacteria</i>    | <i>Bacteria</i> |
| Otu1851 | 0.4                                       | 0.2                            | 0.1               | 0.87                  | 0.17                | 50.87                | <i>Aureispira</i>                   | <i>Saprospiraceae</i>               | <i>Sphingobacteriales</i>           | <i>Sphingobacteria</i>         | <i>Bacteroidetes</i>     | <i>Bacteria</i> |
| Otu0370 | 0.4                                       | 0.2                            | 0.1               | 0.87                  | 0.17                | 51.04                | unclass. <i>Gammaproteobacteria</i> | unclass. <i>Gammaproteobacteria</i> | unclass. <i>Gammaproteobacteria</i> | <i>Gammaproteobacteria</i>     | <i>Proteobacteria</i>    | <i>Bacteria</i> |
| Otu0686 | 0.4                                       | 0.2                            | 0.1               | 0.87                  | 0.17                | 51.21                | <i>Marinomonas</i>                  | <i>Oceanospirillaceae</i>           | <i>Oceanospirillales</i>            | <i>Gammaproteobacteria</i>     | <i>Proteobacteria</i>    | <i>Bacteria</i> |
| Otu0347 | 0.4                                       | 0                              | 0.1               | 0.49                  | 0.16                | 51.37                | unclass. <i>Flavobacteriaceae</i>   | <i>Flavobacteriaceae</i>            | <i>Flavobacteriales</i>             | <i>Flavobacteria</i>           | <i>Bacteroidetes</i>     | <i>Bacteria</i> |
| Otu0151 | 0.28                                      | 0.2                            | 0.1               | 0.69                  | 0.16                | 51.52                | <i>Rhodococcus</i>                  | <i>Nocardiaceae</i>                 | <i>Actinomycetales</i>              | <i>Actinobacteria</i>          | <i>Actinobacteria</i>    | <i>Bacteria</i> |
| Otu0192 | 0.2                                       | 0.28                           | 0.1               | 0.7                   | 0.16                | 51.68                | unclass. <i>Gammaproteobacteria</i> | unclass. <i>Gammaproteobacteria</i> | unclass. <i>Gammaproteobacteria</i> | <i>Gammaproteobacteria</i>     | <i>Proteobacteria</i>    | <i>Bacteria</i> |

| OTU     | Av.A <sub>i</sub><br>(pH <i>in situ</i> ) | Av.A <sub>i</sub><br>(pH 7.67) | Av.δ <sub>i</sub> | Av.δ <sub>i</sub> /SD | Av.δ <sub>i</sub> % | ΣAv.δ <sub>i</sub> % | Genus                               | Family                              | Order                               | Class                          | Phylum                   | Domain          |
|---------|-------------------------------------------|--------------------------------|-------------------|-----------------------|---------------------|----------------------|-------------------------------------|-------------------------------------|-------------------------------------|--------------------------------|--------------------------|-----------------|
| Otu1697 | 0.4                                       | 0                              | 0.1               | 0.8                   | 0.16                | 51.84                | unclass. <i>Bacteria</i>            | unclass. <i>Bacteria</i>            | unclass. <i>Bacteria</i>            | unclass. <i>Bacteria</i>       | unclass. <i>Bacteria</i> | <i>Bacteria</i> |
| Otu0168 | 0.2                                       | 0.28                           | 0.1               | 0.7                   | 0.16                | 51.99                | unclass. <i>Flavobacteriaceae</i>   | <i>Flavobacteriaceae</i>            | <i>Flavobacteriales</i>             | <i>Flavobacteria</i>           | <i>Bacteroidetes</i>     | <i>Bacteria</i> |
| Otu1888 | 0.2                                       | 0.28                           | 0.1               | 0.7                   | 0.16                | 52.15                | unclass. <i>Bacteria</i>            | unclass. <i>Bacteria</i>            | unclass. <i>Bacteria</i>            | unclass. <i>Bacteria</i>       | unclass. <i>Bacteria</i> | <i>Bacteria</i> |
| Otu0212 | 0                                         | 0.4                            | 0.09              | 0.8                   | 0.16                | 52.3                 | <i>Balneola</i>                     | <i>Chitinophagaceae</i>             | <i>Sphingobacteriales</i>           | <i>Sphingobacteria</i>         | <i>Bacteroidetes</i>     | <i>Bacteria</i> |
| Otu1267 | 0.4                                       | 0                              | 0.09              | 0.8                   | 0.16                | 52.46                | unclass. <i>Gammaproteobacteria</i> | unclass. <i>Gammaproteobacteria</i> | unclass. <i>Gammaproteobacteria</i> | <i>Gammaproteobacteria</i>     | <i>Proteobacteria</i>    | <i>Bacteria</i> |
| Otu1818 | 0.4                                       | 0                              | 0.09              | 0.8                   | 0.16                | 52.61                | unclass. <i>Bacteria</i>            | unclass. <i>Bacteria</i>            | unclass. <i>Bacteria</i>            | unclass. <i>Bacteria</i>       | unclass. <i>Bacteria</i> | <i>Bacteria</i> |
| Otu0497 | 0.4                                       | 0                              | 0.09              | 0.8                   | 0.16                | 52.77                | <i>Opitutus</i>                     | <i>Opitutaceae</i>                  | <i>Opitutales</i>                   | <i>Opitutae</i>                | <i>Verrucomicrobia</i>   | <i>Bacteria</i> |
| Otu1480 | 0.4                                       | 0                              | 0.09              | 0.8                   | 0.16                | 52.92                | unclass. <i>Flavobacteriaceae</i>   | <i>Flavobacteriaceae</i>            | <i>Flavobacteriales</i>             | <i>Flavobacteria</i>           | <i>Bacteroidetes</i>     | <i>Bacteria</i> |
| Otu0324 | 0                                         | 0.4                            | 0.09              | 0.8                   | 0.15                | 53.08                | <i>Nisaea</i>                       | <i>Rhodospirillaceae</i>            | <i>Rhodospirillales</i>             | <i>Alphaproteobacteria</i>     | <i>Proteobacteria</i>    | <i>Bacteria</i> |
| Otu1738 | 0                                         | 0.4                            | 0.09              | 0.8                   | 0.15                | 53.23                | unclass. <i>Proteobacteria</i>      | unclass. <i>Proteobacteria</i>      | unclass. <i>Proteobacteria</i>      | unclass. <i>Proteobacteria</i> | <i>Proteobacteria</i>    | <i>Bacteria</i> |
| Otu1927 | 0.2                                       | 0.28                           | 0.09              | 0.69                  | 0.15                | 53.39                | unclass. <i>Flavobacteriales</i>    | unclass. <i>Flavobacteriales</i>    | <i>Flavobacteriales</i>             | <i>Flavobacteria</i>           | <i>Bacteroidetes</i>     | <i>Bacteria</i> |
| Otu1789 | 0.2                                       | 0.28                           | 0.09              | 0.69                  | 0.15                | 53.54                | <i>Colwellia</i>                    | <i>Colwelliaceae</i>                | <i>Alteromonadales</i>              | <i>Gammaproteobacteria</i>     | <i>Proteobacteria</i>    | <i>Bacteria</i> |
| Otu0148 | 0                                         | 0.4                            | 0.09              | 0.8                   | 0.15                | 53.7                 | unclass. <i>Sphingobacteriales</i>  | unclass. <i>Sphingobacteriales</i>  | <i>Sphingobacteriales</i>           | <i>Sphingobacteria</i>         | <i>Bacteroidetes</i>     | <i>Bacteria</i> |
| Otu1997 | 0                                         | 0.4                            | 0.09              | 0.8                   | 0.15                | 53.85                | unclass. <i>Sphingobacteriales</i>  | unclass. <i>Sphingobacteriales</i>  | <i>Sphingobacteriales</i>           | <i>Sphingobacteria</i>         | <i>Bacteroidetes</i>     | <i>Bacteria</i> |
| Otu0115 | 0                                         | 0.4                            | 0.09              | 0.49                  | 0.15                | 54                   | <i>Glaciecola</i>                   | <i>Alteromonadaceae</i>             | <i>Alteromonadales</i>              | <i>Gammaproteobacteria</i>     | <i>Proteobacteria</i>    | <i>Bacteria</i> |
| Otu0266 | 0                                         | 0.4                            | 0.09              | 0.49                  | 0.15                | 54.16                | unclass. <i>Bacteria</i>            | unclass. <i>Bacteria</i>            | unclass. <i>Bacteria</i>            | unclass. <i>Bacteria</i>       | unclass. <i>Bacteria</i> | <i>Bacteria</i> |
| Otu1833 | 0.2                                       | 0.28                           | 0.09              | 0.69                  | 0.15                | 54.31                | unclass. <i>Flavobacteriaceae</i>   | <i>Flavobacteriaceae</i>            | <i>Flavobacteriales</i>             | <i>Flavobacteria</i>           | <i>Bacteroidetes</i>     | <i>Bacteria</i> |
| Otu1854 | 0.28                                      | 0.2                            | 0.09              | 0.69                  | 0.15                | 54.46                | unclass. <i>Gammaproteobacteria</i> | unclass. <i>Gammaproteobacteria</i> | unclass. <i>Gammaproteobacteria</i> | <i>Gammaproteobacteria</i>     | <i>Proteobacteria</i>    | <i>Bacteria</i> |
| Otu0185 | 0.28                                      | 0.2                            | 0.09              | 0.69                  | 0.15                | 54.62                | unclass. <i>Bacteria</i>            | unclass. <i>Bacteria</i>            | unclass. <i>Bacteria</i>            | unclass. <i>Bacteria</i>       | unclass. <i>Bacteria</i> | <i>Bacteria</i> |
| Otu0015 | 0.4                                       | 0                              | 0.09              | 0.8                   | 0.15                | 54.77                | <i>Polaribacter</i>                 | <i>Flavobacteriaceae</i>            | <i>Flavobacteriales</i>             | <i>Flavobacteria</i>           | <i>Bacteroidetes</i>     | <i>Bacteria</i> |
| Otu0093 | 0.4                                       | 0                              | 0.09              | 0.8                   | 0.15                | 54.92                | <i>Aestuariicola</i>                | <i>Flavobacteriaceae</i>            | <i>Flavobacteriales</i>             | <i>Flavobacteria</i>           | <i>Bacteroidetes</i>     | <i>Bacteria</i> |
| Otu0443 | 0.4                                       | 0                              | 0.09              | 0.8                   | 0.15                | 55.08                | unclass. <i>Gammaproteobacteria</i> | unclass. <i>Gammaproteobacteria</i> | unclass. <i>Gammaproteobacteria</i> | <i>Gammaproteobacteria</i>     | <i>Proteobacteria</i>    | <i>Bacteria</i> |
| Otu0858 | 0.4                                       | 0                              | 0.09              | 0.8                   | 0.15                | 55.23                | unclass. <i>Flavobacteriaceae</i>   | <i>Flavobacteriaceae</i>            | <i>Flavobacteriales</i>             | <i>Flavobacteria</i>           | <i>Bacteroidetes</i>     | <i>Bacteria</i> |
| Otu1827 | 0.4                                       | 0                              | 0.09              | 0.8                   | 0.15                | 55.38                | unclass. <i>Acidobacteria_Gp22</i>  | unclass. <i>Acidobacteria_Gp22</i>  | unclass. <i>Acidobacteria_Gp22</i>  | <i>Acidobacteria_Gp22</i>      | <i>Acidobacteria</i>     | <i>Bacteria</i> |
| Otu1865 | 0.2                                       | 0.28                           | 0.09              | 0.69                  | 0.15                | 55.54                | unclass. <i>Proteobacteria</i>      | unclass. <i>Proteobacteria</i>      | unclass. <i>Proteobacteria</i>      | unclass. <i>Proteobacteria</i> | <i>Proteobacteria</i>    | <i>Bacteria</i> |
| Otu0460 | 0.2                                       | 0.28                           | 0.09              | 0.69                  | 0.15                | 55.69                | <i>Arcobacter</i>                   | <i>Campylobacteraceae</i>           | <i>Campylobacterales</i>            | <i>Epsilonproteobacteria</i>   | <i>Proteobacteria</i>    | <i>Bacteria</i> |
| Otu0919 | 0.2                                       | 0.28                           | 0.09              | 0.69                  | 0.15                | 55.84                | unclass. <i>Gammaproteobacteria</i> | unclass. <i>Gammaproteobacteria</i> | unclass. <i>Gammaproteobacteria</i> | <i>Gammaproteobacteria</i>     | <i>Proteobacteria</i>    | <i>Bacteria</i> |

| OTU     | Av.A <sub>i</sub><br>(pH <i>in situ</i> ) | Av.A <sub>i</sub><br>(pH 7.67) | Av.δ <sub>i</sub> | Av.δ <sub>i</sub> /SD | Av.δ <sub>i</sub> % | ΣAv.δ <sub>i</sub> % | Genus                               | Family                              | Order                               | Class                          | Phylum                   | Domain          |
|---------|-------------------------------------------|--------------------------------|-------------------|-----------------------|---------------------|----------------------|-------------------------------------|-------------------------------------|-------------------------------------|--------------------------------|--------------------------|-----------------|
| Otu1875 | 0.4                                       | 0                              | 0.09              | 0.8                   | 0.15                | 55.99                | unclass. <i>Bacteria</i>            | unclass. <i>Bacteria</i>            | unclass. <i>Bacteria</i>            | unclass. <i>Bacteria</i>       | unclass. <i>Bacteria</i> | <i>Bacteria</i> |
| Otu1913 | 0.4                                       | 0                              | 0.09              | 0.8                   | 0.15                | 56.15                | unclass. <i>Gammaproteobacteria</i> | unclass. <i>Gammaproteobacteria</i> | unclass. <i>Gammaproteobacteria</i> | <i>Gammaproteobacteria</i>     | <i>Proteobacteria</i>    | <i>Bacteria</i> |
| Otu0330 | 0                                         | 0.4                            | 0.09              | 0.8                   | 0.15                | 56.3                 | <i>Photobacterium</i>               | <i>Vibrionaceae</i>                 | <i>Vibrionales</i>                  | <i>Gammaproteobacteria</i>     | <i>Proteobacteria</i>    | <i>Bacteria</i> |
| Otu0412 | 0                                         | 0.4                            | 0.09              | 0.8                   | 0.15                | 56.45                | unclass. <i>Bacteroidetes</i>       | unclass. <i>Bacteroidetes</i>       | unclass. <i>Bacteroidetes</i>       | unclass. <i>Bacteroidetes</i>  | <i>Bacteroidetes</i>     | <i>Bacteria</i> |
| Otu1273 | 0                                         | 0.4                            | 0.09              | 0.8                   | 0.15                | 56.61                | unclass. <i>Bacteria</i>            | unclass. <i>Bacteria</i>            | unclass. <i>Bacteria</i>            | unclass. <i>Bacteria</i>       | unclass. <i>Bacteria</i> | <i>Bacteria</i> |
| Otu1823 | 0                                         | 0.4                            | 0.09              | 0.8                   | 0.15                | 56.76                | unclass. <i>Rhodobacteraceae</i>    | <i>Rhodobacteraceae</i>             | <i>Rhodobacterales</i>              | <i>Alphaproteobacteria</i>     | <i>Proteobacteria</i>    | <i>Bacteria</i> |
| Otu2091 | 0                                         | 0.4                            | 0.09              | 0.8                   | 0.15                | 56.91                | <i>Aureispira</i>                   | <i>Saprospiraceae</i>               | <i>Sphingobacteriales</i>           | <i>Sphingobacteria</i>         | <i>Bacteroidetes</i>     | <i>Bacteria</i> |
| Otu0176 | 0                                         | 0.4                            | 0.09              | 0.8                   | 0.15                | 57.06                | <i>Colwellia</i>                    | <i>Colwelliaceae</i>                | <i>Alteromonadales</i>              | <i>Gammaproteobacteria</i>     | <i>Proteobacteria</i>    | <i>Bacteria</i> |
| Otu1980 | 0                                         | 0.4                            | 0.09              | 0.8                   | 0.15                | 57.22                | <i>Sulfurovum</i>                   | <i>Helicobacteraceae</i>            | <i>Campylobacteriales</i>           | <i>Epsilonproteobacteria</i>   | <i>Proteobacteria</i>    | <i>Bacteria</i> |
| Otu1996 | 0                                         | 0.4                            | 0.09              | 0.8                   | 0.15                | 57.37                | unclass. <i>Bacteria</i>            | unclass. <i>Bacteria</i>            | unclass. <i>Bacteria</i>            | unclass. <i>Bacteria</i>       | unclass. <i>Bacteria</i> | <i>Bacteria</i> |
| Otu0196 | 0                                         | 0.4                            | 0.09              | 0.8                   | 0.15                | 57.52                | unclass. <i>Flavobacteriaceae</i>   | <i>Flavobacteriaceae</i>            | <i>Flavobacteriales</i>             | <i>Flavobacteria</i>           | <i>Bacteroidetes</i>     | <i>Bacteria</i> |
| Otu0286 | 0                                         | 0.4                            | 0.09              | 0.8                   | 0.15                | 57.67                | unclass. <i>Gammaproteobacteria</i> | unclass. <i>Gammaproteobacteria</i> | unclass. <i>Gammaproteobacteria</i> | <i>Gammaproteobacteria</i>     | <i>Proteobacteria</i>    | <i>Bacteria</i> |
| Otu1071 | 0                                         | 0.4                            | 0.09              | 0.8                   | 0.15                | 57.82                | unclass. <i>Colwelliaceae</i>       | <i>Colwelliaceae</i>                | <i>Alteromonadales</i>              | <i>Gammaproteobacteria</i>     | <i>Proteobacteria</i>    | <i>Bacteria</i> |
| Otu1990 | 0                                         | 0.4                            | 0.09              | 0.8                   | 0.15                | 57.98                | unclass. <i>Gammaproteobacteria</i> | unclass. <i>Gammaproteobacteria</i> | unclass. <i>Gammaproteobacteria</i> | <i>Gammaproteobacteria</i>     | <i>Proteobacteria</i>    | <i>Bacteria</i> |
| Otu1824 | 0.4                                       | 0                              | 0.09              | 0.8                   | 0.15                | 58.13                | unclass. <i>Gammaproteobacteria</i> | unclass. <i>Gammaproteobacteria</i> | unclass. <i>Gammaproteobacteria</i> | <i>Gammaproteobacteria</i>     | <i>Proteobacteria</i>    | <i>Bacteria</i> |
| Otu1841 | 0.4                                       | 0                              | 0.09              | 0.8                   | 0.15                | 58.28                | unclass. <i>Flavobacteriaceae</i>   | <i>Flavobacteriaceae</i>            | <i>Flavobacteriales</i>             | <i>Flavobacteria</i>           | <i>Bacteroidetes</i>     | <i>Bacteria</i> |
| Otu0191 | 0.4                                       | 0                              | 0.09              | 0.8                   | 0.15                | 58.43                | unclass. <i>Proteobacteria</i>      | unclass. <i>Proteobacteria</i>      | unclass. <i>Proteobacteria</i>      | unclass. <i>Proteobacteria</i> | <i>Proteobacteria</i>    | <i>Bacteria</i> |
| Otu1532 | 0                                         | 0.4                            | 0.09              | 0.8                   | 0.15                | 58.58                | unclass. <i>Gammaproteobacteria</i> | unclass. <i>Gammaproteobacteria</i> | unclass. <i>Gammaproteobacteria</i> | <i>Gammaproteobacteria</i>     | <i>Proteobacteria</i>    | <i>Bacteria</i> |
| Otu2024 | 0                                         | 0.4                            | 0.09              | 0.8                   | 0.15                | 58.74                | <i>Desulfosarcina</i>               | <i>Desulfobacteraceae</i>           | <i>Desulfobacteriales</i>           | <i>Deltaproteobacteria</i>     | <i>Proteobacteria</i>    | <i>Bacteria</i> |
| Otu0157 | 1.75                                      | 1.46                           | 0.09              | 1.01                  | 0.15                | 58.88                | unclass. <i>Gammaproteobacteria</i> | unclass. <i>Gammaproteobacteria</i> | unclass. <i>Gammaproteobacteria</i> | <i>Gammaproteobacteria</i>     | <i>Proteobacteria</i>    | <i>Bacteria</i> |
| Otu0119 | 0.35                                      | 0                              | 0.08              | 0.49                  | 0.14                | 59.02                | <i>Colwellia</i>                    | <i>Colwelliaceae</i>                | <i>Alteromonadales</i>              | <i>Gammaproteobacteria</i>     | <i>Proteobacteria</i>    | <i>Bacteria</i> |
| Otu1883 | 0.35                                      | 0                              | 0.08              | 0.49                  | 0.14                | 59.16                | unclass. <i>Rhodobacteraceae</i>    | <i>Rhodobacteraceae</i>             | <i>Rhodobacterales</i>              | <i>Alphaproteobacteria</i>     | <i>Proteobacteria</i>    | <i>Bacteria</i> |
| Otu0249 | 0                                         | 0.35                           | 0.08              | 0.49                  | 0.13                | 59.29                | unclass. <i>Bacteria</i>            | unclass. <i>Bacteria</i>            | unclass. <i>Bacteria</i>            | unclass. <i>Bacteria</i>       | unclass. <i>Bacteria</i> | <i>Bacteria</i> |
| Otu0305 | 0                                         | 0.35                           | 0.08              | 0.49                  | 0.13                | 59.42                | unclass. <i>Bacteria</i>            | unclass. <i>Bacteria</i>            | unclass. <i>Bacteria</i>            | unclass. <i>Bacteria</i>       | unclass. <i>Bacteria</i> | <i>Bacteria</i> |
| Otu0108 | 0.2                                       | 0.2                            | 0.08              | 0.67                  | 0.12                | 59.55                | unclass. <i>Colwelliaceae</i>       | <i>Colwelliaceae</i>                | <i>Alteromonadales</i>              | <i>Gammaproteobacteria</i>     | <i>Proteobacteria</i>    | <i>Bacteria</i> |
| Otu0618 | 0.2                                       | 0.2                            | 0.08              | 0.67                  | 0.12                | 59.67                | <i>Glaciecola</i>                   | <i>Alteromonadaceae</i>             | <i>Alteromonadales</i>              | <i>Gammaproteobacteria</i>     | <i>Proteobacteria</i>    | <i>Bacteria</i> |
| Otu1505 | 0.2                                       | 0.2                            | 0.08              | 0.67                  | 0.12                | 59.8                 | unclass. <i>Desulfobacteraceae</i>  | <i>Desulfobacteraceae</i>           | <i>Desulfobacteriales</i>           | <i>Deltaproteobacteria</i>     | <i>Proteobacteria</i>    | <i>Bacteria</i> |

| OTU     | Av.A <sub>i</sub><br>(pH <i>in situ</i> ) | Av.A <sub>i</sub><br>(pH 7.67) | Av.δ <sub>i</sub> | Av.δ <sub>i</sub> /SD | Av.δ <sub>i</sub> % | ΣAv.δ <sub>i</sub> % | Genus                               | Family                              | Order                               | Class                         | Phylum                   | Domain          |
|---------|-------------------------------------------|--------------------------------|-------------------|-----------------------|---------------------|----------------------|-------------------------------------|-------------------------------------|-------------------------------------|-------------------------------|--------------------------|-----------------|
| Otu0240 | 0.2                                       | 0.2                            | 0.08              | 0.67                  | 0.12                | 59.92                | unclass. <i>Chromatiales</i>        | unclass. <i>Chromatiales</i>        | <i>Chromatiales</i>                 | <i>Gammaproteobacteria</i>    | <i>Proteobacteria</i>    | <i>Bacteria</i> |
| Otu0931 | 0.2                                       | 0.2                            | 0.08              | 0.67                  | 0.12                | 60.04                | <i>Robiginitalea</i>                | <i>Flavobacteriaceae</i>            | <i>Flavobacteriales</i>             | <i>Flavobacteria</i>          | <i>Bacteroidetes</i>     | <i>Bacteria</i> |
| Otu1017 | 0.2                                       | 0.2                            | 0.08              | 0.67                  | 0.12                | 60.17                | unclass. <i>Actinomycetales</i>     | unclass. <i>Actinomycetales</i>     | <i>Actinomycetales</i>              | <i>Actinobacteria</i>         | <i>Actinobacteria</i>    | <i>Bacteria</i> |
| Otu0331 | 0.2                                       | 0.2                            | 0.08              | 0.67                  | 0.12                | 60.29                | unclass. <i>Gammaproteobacteria</i> | unclass. <i>Gammaproteobacteria</i> | unclass. <i>Gammaproteobacteria</i> | <i>Gammaproteobacteria</i>    | <i>Proteobacteria</i>    | <i>Bacteria</i> |
| Otu0421 | 0.2                                       | 0.2                            | 0.08              | 0.67                  | 0.12                | 60.42                | unclass. <i>Gammaproteobacteria</i> | unclass. <i>Gammaproteobacteria</i> | unclass. <i>Gammaproteobacteria</i> | <i>Gammaproteobacteria</i>    | <i>Proteobacteria</i>    | <i>Bacteria</i> |
| Otu1953 | 0.2                                       | 0.2                            | 0.08              | 0.67                  | 0.12                | 60.54                | unclass. <i>Gammaproteobacteria</i> | unclass. <i>Gammaproteobacteria</i> | unclass. <i>Gammaproteobacteria</i> | <i>Gammaproteobacteria</i>    | <i>Proteobacteria</i>    | <i>Bacteria</i> |
| Otu0314 | 0.2                                       | 0.2                            | 0.08              | 0.67                  | 0.12                | 60.66                | unclass. <i>Flavobacteriaceae</i>   | <i>Flavobacteriaceae</i>            | <i>Flavobacteriales</i>             | <i>Flavobacteria</i>          | <i>Bacteroidetes</i>     | <i>Bacteria</i> |
| Otu1889 | 0.2                                       | 0.2                            | 0.08              | 0.67                  | 0.12                | 60.79                | unclass. <i>Gammaproteobacteria</i> | unclass. <i>Gammaproteobacteria</i> | unclass. <i>Gammaproteobacteria</i> | <i>Gammaproteobacteria</i>    | <i>Proteobacteria</i>    | <i>Bacteria</i> |
| Otu1890 | 0.2                                       | 0.2                            | 0.08              | 0.67                  | 0.12                | 60.91                | unclass. <i>Bacteria</i>            | unclass. <i>Bacteria</i>            | unclass. <i>Bacteria</i>            | unclass. <i>Bacteria</i>      | unclass. <i>Bacteria</i> | <i>Bacteria</i> |
| Otu1908 | 0.2                                       | 0.2                            | 0.08              | 0.67                  | 0.12                | 61.04                | unclass. <i>Flavobacteriaceae</i>   | <i>Flavobacteriaceae</i>            | <i>Flavobacteriales</i>             | <i>Flavobacteria</i>          | <i>Bacteroidetes</i>     | <i>Bacteria</i> |
| Otu0159 | 0.2                                       | 0.2                            | 0.08              | 0.67                  | 0.12                | 61.16                | unclass. <i>Saprospiraceae</i>      | <i>Saprospiraceae</i>               | <i>Sphingobacteriales</i>           | <i>Sphingobacteria</i>        | <i>Bacteroidetes</i>     | <i>Bacteria</i> |
| Otu0765 | 0.2                                       | 0.2                            | 0.08              | 0.67                  | 0.12                | 61.28                | <i>Pelagicoccus</i>                 | <i>Puniceicoccaceae</i>             | <i>Puniceicoccales</i>              | <i>Opitutae</i>               | <i>Verrucomicrobia</i>   | <i>Bacteria</i> |
| Otu1907 | 0.2                                       | 0.2                            | 0.08              | 0.67                  | 0.12                | 61.41                | unclass. <i>Flavobacteriaceae</i>   | <i>Flavobacteriaceae</i>            | <i>Flavobacteriales</i>             | <i>Flavobacteria</i>          | <i>Bacteroidetes</i>     | <i>Bacteria</i> |
| Otu0278 | 0.2                                       | 0.2                            | 0.07              | 0.67                  | 0.12                | 61.53                | unclass. <i>Gammaproteobacteria</i> | unclass. <i>Gammaproteobacteria</i> | unclass. <i>Gammaproteobacteria</i> | <i>Gammaproteobacteria</i>    | <i>Proteobacteria</i>    | <i>Bacteria</i> |
| Otu0247 | 0.2                                       | 0.2                            | 0.07              | 0.67                  | 0.12                | 61.65                | unclass. <i>Flavobacteriaceae</i>   | <i>Flavobacteriaceae</i>            | <i>Flavobacteriales</i>             | <i>Flavobacteria</i>          | <i>Bacteroidetes</i>     | <i>Bacteria</i> |
| Otu0498 | 0.2                                       | 0.2                            | 0.07              | 0.67                  | 0.12                | 61.77                | unclass. <i>Flavobacteriales</i>    | unclass. <i>Flavobacteriales</i>    | <i>Flavobacteriales</i>             | <i>Flavobacteria</i>          | <i>Bacteroidetes</i>     | <i>Bacteria</i> |
| Otu0895 | 0.2                                       | 0.2                            | 0.07              | 0.67                  | 0.12                | 61.9                 | unclass. <i>Actinobacteria</i>      | unclass. <i>Actinobacteria</i>      | unclass. <i>Actinobacteria</i>      | <i>Actinobacteria</i>         | <i>Actinobacteria</i>    | <i>Bacteria</i> |
| Otu0601 | 0.2                                       | 0.2                            | 0.07              | 0.67                  | 0.12                | 62.02                | unclass. <i>Flammeovirgaceae</i>    | <i>Flammeovirgaceae</i>             | <i>Sphingobacteriales</i>           | <i>Sphingobacteria</i>        | <i>Bacteroidetes</i>     | <i>Bacteria</i> |
| Otu1666 | 0.2                                       | 0.2                            | 0.07              | 0.67                  | 0.12                | 62.14                | unclass. <i>Bacteria</i>            | unclass. <i>Bacteria</i>            | unclass. <i>Bacteria</i>            | unclass. <i>Bacteria</i>      | unclass. <i>Bacteria</i> | <i>Bacteria</i> |
| Otu0070 | 0.2                                       | 0.2                            | 0.07              | 0.67                  | 0.12                | 62.26                | <i>Winogradskyella</i>              | <i>Flavobacteriaceae</i>            | <i>Flavobacteriales</i>             | <i>Flavobacteria</i>          | <i>Bacteroidetes</i>     | <i>Bacteria</i> |
| Otu1919 | 0.2                                       | 0.2                            | 0.07              | 0.67                  | 0.12                | 62.39                | unclass. <i>Bacteroidetes</i>       | unclass. <i>Bacteroidetes</i>       | unclass. <i>Bacteroidetes</i>       | unclass. <i>Bacteroidetes</i> | <i>Bacteroidetes</i>     | <i>Bacteria</i> |
| Otu0426 | 0.2                                       | 0.2                            | 0.07              | 0.67                  | 0.12                | 62.51                | unclass. <i>Gammaproteobacteria</i> | unclass. <i>Gammaproteobacteria</i> | unclass. <i>Gammaproteobacteria</i> | <i>Gammaproteobacteria</i>    | <i>Proteobacteria</i>    | <i>Bacteria</i> |
| Otu0274 | 0.2                                       | 0.2                            | 0.07              | 0.67                  | 0.12                | 62.63                | unclass. <i>Alphaproteobacteria</i> | unclass. <i>Alphaproteobacteria</i> | unclass. <i>Alphaproteobacteria</i> | <i>Alphaproteobacteria</i>    | <i>Proteobacteria</i>    | <i>Bacteria</i> |
| Otu0445 | 0.2                                       | 0.2                            | 0.07              | 0.67                  | 0.12                | 62.75                | unclass. <i>Gammaproteobacteria</i> | unclass. <i>Gammaproteobacteria</i> | unclass. <i>Gammaproteobacteria</i> | <i>Gammaproteobacteria</i>    | <i>Proteobacteria</i>    | <i>Bacteria</i> |
| Otu0031 | 0.2                                       | 0.2                            | 0.07              | 0.67                  | 0.12                | 62.88                | unclass. <i>Gammaproteobacteria</i> | unclass. <i>Gammaproteobacteria</i> | unclass. <i>Gammaproteobacteria</i> | <i>Gammaproteobacteria</i>    | <i>Proteobacteria</i>    | <i>Bacteria</i> |
| Otu0373 | 0.2                                       | 0.2                            | 0.07              | 0.67                  | 0.12                | 63                   | unclass. <i>Bacteria</i>            | unclass. <i>Bacteria</i>            | unclass. <i>Bacteria</i>            | unclass. <i>Bacteria</i>      | unclass. <i>Bacteria</i> | <i>Bacteria</i> |
| Otu1825 | 0.2                                       | 0.2                            | 0.07              | 0.67                  | 0.12                | 63.12                | unclass. <i>Gammaproteobacteria</i> | unclass. <i>Gammaproteobacteria</i> | unclass. <i>Gammaproteobacteria</i> | <i>Gammaproteobacteria</i>    | <i>Proteobacteria</i>    | <i>Bacteria</i> |

| OTU     | Av.A <sub>i</sub><br>(pH <i>in situ</i> ) | Av.A <sub>i</sub><br>(pH 7.67) | Av.δ <sub>i</sub> | Av.δ <sub>i</sub> /SD | Av.δ <sub>i</sub> % | ΣAv.δ <sub>i</sub> % | Genus                               | Family                              | Order                               | Class                          | Phylum                   | Domain          |
|---------|-------------------------------------------|--------------------------------|-------------------|-----------------------|---------------------|----------------------|-------------------------------------|-------------------------------------|-------------------------------------|--------------------------------|--------------------------|-----------------|
| Otu1842 | 0.2                                       | 0.2                            | 0.07              | 0.67                  | 0.12                | 63.24                | unclass. <i>Bacteroidetes</i>       | unclass. <i>Bacteroidetes</i>       | unclass. <i>Bacteroidetes</i>       | unclass. <i>Bacteroidetes</i>  | <i>Bacteroidetes</i>     | <i>Bacteria</i> |
| Otu1105 | 0.2                                       | 0.2                            | 0.07              | 0.67                  | 0.12                | 63.36                | unclass. <i>Proteobacteria</i>      | unclass. <i>Proteobacteria</i>      | unclass. <i>Proteobacteria</i>      | unclass. <i>Proteobacteria</i> | <i>Proteobacteria</i>    | <i>Bacteria</i> |
| Otu0404 | 0.2                                       | 0.2                            | 0.07              | 0.67                  | 0.12                | 63.48                | unclass. <i>Flavobacteriaceae</i>   | <i>Flavobacteriaceae</i>            | <i>Flavobacteriales</i>             | <i>Flavobacteria</i>           | <i>Bacteroidetes</i>     | <i>Bacteria</i> |
| Otu1245 | 0.2                                       | 0.2                            | 0.07              | 0.67                  | 0.12                | 63.61                | unclass. <i>Gammaproteobacteria</i> | unclass. <i>Gammaproteobacteria</i> | unclass. <i>Gammaproteobacteria</i> | <i>Gammaproteobacteria</i>     | <i>Proteobacteria</i>    | <i>Bacteria</i> |
| Otu1359 | 0.2                                       | 0.2                            | 0.07              | 0.67                  | 0.12                | 63.73                | unclass. <i>Gammaproteobacteria</i> | unclass. <i>Gammaproteobacteria</i> | unclass. <i>Gammaproteobacteria</i> | <i>Gammaproteobacteria</i>     | <i>Proteobacteria</i>    | <i>Bacteria</i> |
| Otu0167 | 0.2                                       | 0.2                            | 0.07              | 0.67                  | 0.12                | 63.85                | unclass. <i>Rhodobacteraceae</i>    | <i>Rhodobacteraceae</i>             | <i>Rhodobacterales</i>              | <i>Alphaproteobacteria</i>     | <i>Proteobacteria</i>    | <i>Bacteria</i> |
| Otu0459 | 0.28                                      | 0                              | 0.07              | 0.49                  | 0.11                | 63.96                | <i>Croceibacter</i>                 | <i>Flavobacteriaceae</i>            | <i>Flavobacteriales</i>             | <i>Flavobacteria</i>           | <i>Bacteroidetes</i>     | <i>Bacteria</i> |
| Otu1188 | 0.28                                      | 0                              | 0.07              | 0.49                  | 0.11                | 64.07                | unclass. <i>Flammeovirgaceae</i>    | <i>Flammeovirgaceae</i>             | <i>Sphingobacteriales</i>           | <i>Sphingobacteria</i>         | <i>Bacteroidetes</i>     | <i>Bacteria</i> |
| Otu1383 | 0                                         | 0.28                           | 0.07              | 0.49                  | 0.11                | 64.19                | unclass. <i>Bacteria</i>            | unclass. <i>Bacteria</i>            | unclass. <i>Bacteria</i>            | unclass. <i>Bacteria</i>       | unclass. <i>Bacteria</i> | <i>Bacteria</i> |
| Otu1916 | 0                                         | 0.28                           | 0.07              | 0.49                  | 0.11                | 64.3                 | unclass. <i>Oceanospirillaceae</i>  | <i>Oceanospirillaceae</i>           | <i>Oceanospirillales</i>            | <i>Gammaproteobacteria</i>     | <i>Proteobacteria</i>    | <i>Bacteria</i> |
| Otu0490 | 0.28                                      | 0                              | 0.07              | 0.49                  | 0.11                | 64.41                | unclass. <i>Burkholderiales</i>     | unclass. <i>Burkholderiales</i>     | <i>Burkholderiales</i>              | <i>Betaproteobacteria</i>      | <i>Proteobacteria</i>    | <i>Bacteria</i> |
| Otu1274 | 0.28                                      | 0                              | 0.07              | 0.49                  | 0.11                | 64.52                | unclass. <i>Gammaproteobacteria</i> | unclass. <i>Gammaproteobacteria</i> | unclass. <i>Gammaproteobacteria</i> | <i>Gammaproteobacteria</i>     | <i>Proteobacteria</i>    | <i>Bacteria</i> |
| Otu1909 | 0.28                                      | 0                              | 0.07              | 0.49                  | 0.11                | 64.62                | unclass. <i>Bacteria</i>            | unclass. <i>Bacteria</i>            | unclass. <i>Bacteria</i>            | unclass. <i>Bacteria</i>       | unclass. <i>Bacteria</i> | <i>Bacteria</i> |
| Otu1910 | 0.28                                      | 0                              | 0.07              | 0.49                  | 0.11                | 64.73                | unclass. <i>Gammaproteobacteria</i> | unclass. <i>Gammaproteobacteria</i> | unclass. <i>Gammaproteobacteria</i> | <i>Gammaproteobacteria</i>     | <i>Proteobacteria</i>    | <i>Bacteria</i> |
| Otu1922 | 0.28                                      | 0                              | 0.07              | 0.49                  | 0.11                | 64.84                | unclass. <i>Bacteria</i>            | unclass. <i>Bacteria</i>            | unclass. <i>Bacteria</i>            | unclass. <i>Bacteria</i>       | unclass. <i>Bacteria</i> | <i>Bacteria</i> |
| Otu0422 | 0                                         | 0.28                           | 0.07              | 0.49                  | 0.11                | 64.95                | unclass. <i>Gammaproteobacteria</i> | unclass. <i>Gammaproteobacteria</i> | unclass. <i>Gammaproteobacteria</i> | <i>Gammaproteobacteria</i>     | <i>Proteobacteria</i>    | <i>Bacteria</i> |
| Otu0714 | 0                                         | 0.28                           | 0.07              | 0.49                  | 0.11                | 65.06                | unclass. <i>Alphaproteobacteria</i> | unclass. <i>Alphaproteobacteria</i> | unclass. <i>Alphaproteobacteria</i> | <i>Alphaproteobacteria</i>     | <i>Proteobacteria</i>    | <i>Bacteria</i> |
| Otu1967 | 0                                         | 0.28                           | 0.07              | 0.49                  | 0.11                | 65.17                | unclass. <i>Deltaproteobacteria</i> | unclass. <i>Deltaproteobacteria</i> | unclass. <i>Deltaproteobacteria</i> | <i>Deltaproteobacteria</i>     | <i>Proteobacteria</i>    | <i>Bacteria</i> |
| Otu1968 | 0                                         | 0.28                           | 0.07              | 0.49                  | 0.11                | 65.28                | unclass. <i>Saprospiraceae</i>      | <i>Saprospiraceae</i>               | <i>Sphingobacteriales</i>           | <i>Sphingobacteria</i>         | <i>Bacteroidetes</i>     | <i>Bacteria</i> |
| Otu1992 | 0                                         | 0.28                           | 0.07              | 0.49                  | 0.11                | 65.38                | unclass. <i>Desulfobacteraceae</i>  | <i>Desulfobacteraceae</i>           | <i>Desulfobacterales</i>            | <i>Deltaproteobacteria</i>     | <i>Proteobacteria</i>    | <i>Bacteria</i> |
| Otu1819 | 0.28                                      | 0                              | 0.07              | 0.49                  | 0.11                | 65.49                | unclass. <i>Bacteroidetes</i>       | unclass. <i>Bacteroidetes</i>       | unclass. <i>Bacteroidetes</i>       | unclass. <i>Bacteroidetes</i>  | <i>Bacteroidetes</i>     | <i>Bacteria</i> |
| Otu0256 | 0.28                                      | 0                              | 0.07              | 0.49                  | 0.11                | 65.6                 | <i>Glaciecola</i>                   | <i>Alteromonadaceae</i>             | <i>Alteromonadales</i>              | <i>Gammaproteobacteria</i>     | <i>Proteobacteria</i>    | <i>Bacteria</i> |
| Otu0985 | 0.28                                      | 0                              | 0.07              | 0.49                  | 0.11                | 65.71                | unclass. <i>Gammaproteobacteria</i> | unclass. <i>Gammaproteobacteria</i> | unclass. <i>Gammaproteobacteria</i> | <i>Gammaproteobacteria</i>     | <i>Proteobacteria</i>    | <i>Bacteria</i> |
| Otu0271 | 0.28                                      | 0                              | 0.07              | 0.49                  | 0.11                | 65.81                | unclass. <i>Proteobacteria</i>      | unclass. <i>Proteobacteria</i>      | unclass. <i>Proteobacteria</i>      | unclass. <i>Proteobacteria</i> | <i>Proteobacteria</i>    | <i>Bacteria</i> |
| Otu0691 | 0.28                                      | 0                              | 0.07              | 0.49                  | 0.11                | 65.92                | <i>Planctomyces</i>                 | <i>Planctomycetaceae</i>            | <i>Planctomycetales</i>             | <i>Planctomycetacia</i>        | <i>Planctomycetes</i>    | <i>Bacteria</i> |
| Otu0880 | 0.28                                      | 0                              | 0.07              | 0.49                  | 0.11                | 66.03                | unclass. <i>Flavobacteriaceae</i>   | <i>Flavobacteriaceae</i>            | <i>Flavobacteriales</i>             | <i>Flavobacteria</i>           | <i>Bacteroidetes</i>     | <i>Bacteria</i> |
| Otu1228 | 0.28                                      | 0                              | 0.07              | 0.49                  | 0.11                | 66.14                | unclass. <i>Desulfobulbaceae</i>    | <i>Desulfobulbaceae</i>             | <i>Desulfobacterales</i>            | <i>Deltaproteobacteria</i>     | <i>Proteobacteria</i>    | <i>Bacteria</i> |

| OTU     | Av.A <sub>i</sub><br>(pH <i>in situ</i> ) | Av.A <sub>i</sub><br>(pH 7.67) | Av.δ <sub>i</sub> | Av.δ <sub>i</sub> /SD | Av.δ <sub>i</sub> % | ΣAv.δ <sub>i</sub> % | Genus                                 | Family                                | Order                                 | Class                         | Phylum                     | Domain          |
|---------|-------------------------------------------|--------------------------------|-------------------|-----------------------|---------------------|----------------------|---------------------------------------|---------------------------------------|---------------------------------------|-------------------------------|----------------------------|-----------------|
| Otu1696 | 0.28                                      | 0                              | 0.07              | 0.49                  | 0.11                | 66.24                | <i>Pelagibacter</i>                   | SAR11-clade                           | <i>Rickettsiales</i>                  | <i>Alphaproteobacteria</i>    | <i>Proteobacteria</i>      | <i>Bacteria</i> |
| Otu0316 | 0                                         | 0.28                           | 0.07              | 0.49                  | 0.11                | 66.35                | unclass. <i>Bacteria</i>              | unclass. <i>Bacteria</i>              | unclass. <i>Bacteria</i>              | unclass. <i>Bacteria</i>      | unclass. <i>Bacteria</i>   | <i>Bacteria</i> |
| Otu1156 | 0                                         | 0.28                           | 0.07              | 0.49                  | 0.11                | 66.46                | unclass. <i>Gammaproteobacteria</i>   | unclass. <i>Gammaproteobacteria</i>   | unclass. <i>Gammaproteobacteria</i>   | <i>Gammaproteobacteria</i>    | <i>Proteobacteria</i>      | <i>Bacteria</i> |
| Otu2011 | 0                                         | 0.28                           | 0.07              | 0.49                  | 0.11                | 66.56                | unclass. <i>Bacteria</i>              | unclass. <i>Bacteria</i>              | unclass. <i>Bacteria</i>              | unclass. <i>Bacteria</i>      | unclass. <i>Bacteria</i>   | <i>Bacteria</i> |
| Otu2012 | 0                                         | 0.28                           | 0.07              | 0.49                  | 0.11                | 66.67                | <i>Neisseria</i>                      | <i>Neisseriaceae</i>                  | <i>Neisseriales</i>                   | <i>Betaproteobacteria</i>     | <i>Proteobacteria</i>      | <i>Bacteria</i> |
| Otu2032 | 0                                         | 0.28                           | 0.07              | 0.49                  | 0.11                | 66.78                | unclass. <i>Bacteroidetes</i>         | unclass. <i>Bacteroidetes</i>         | unclass. <i>Bacteroidetes</i>         | unclass. <i>Bacteroidetes</i> | <i>Bacteroidetes</i>       | <i>Bacteria</i> |
| Otu0217 | 0.2                                       | 0                              | 0.05              | 0.49                  | 0.08                | 66.86                | unclass. <i>Flavobacteriales</i>      | unclass. <i>Flavobacteriales</i>      | <i>Flavobacteriales</i>               | <i>Flavobacteria</i>          | <i>Bacteroidetes</i>       | <i>Bacteria</i> |
| Otu0295 | 0.2                                       | 0                              | 0.05              | 0.49                  | 0.08                | 66.94                | <i>Haliea</i>                         | <i>Alteromonadaceae</i>               | <i>Alteromonadales</i>                | <i>Gammaproteobacteria</i>    | <i>Proteobacteria</i>      | <i>Bacteria</i> |
| Otu0398 | 0.2                                       | 0                              | 0.05              | 0.49                  | 0.08                | 67.02                | unclass. <i>Flavobacteriaceae</i>     | <i>Flavobacteriaceae</i>              | <i>Flavobacteriales</i>               | <i>Flavobacteria</i>          | <i>Bacteroidetes</i>       | <i>Bacteria</i> |
| Otu0436 | 0.2                                       | 0                              | 0.05              | 0.49                  | 0.08                | 67.1                 | unclass. <i>Rhodobacteraceae</i>      | <i>Rhodobacteraceae</i>               | <i>Rhodobacterales</i>                | <i>Alphaproteobacteria</i>    | <i>Proteobacteria</i>      | <i>Bacteria</i> |
| Otu0479 | 0.2                                       | 0                              | 0.05              | 0.49                  | 0.08                | 67.17                | unclass. <i>Rhodospirillaceae</i>     | <i>Rhodospirillaceae</i>              | <i>Rhodospirillales</i>               | <i>Alphaproteobacteria</i>    | <i>Proteobacteria</i>      | <i>Bacteria</i> |
| Otu0718 | 0.2                                       | 0                              | 0.05              | 0.49                  | 0.08                | 67.25                | <i>Aureispira</i>                     | <i>Saprospiraceae</i>                 | <i>Sphingobacteriales</i>             | <i>Sphingobacteria</i>        | <i>Bacteroidetes</i>       | <i>Bacteria</i> |
| Otu1008 | 0.2                                       | 0                              | 0.05              | 0.49                  | 0.08                | 67.33                | unclass. <i>Flavobacteriaceae</i>     | <i>Flavobacteriaceae</i>              | <i>Flavobacteriales</i>               | <i>Flavobacteria</i>          | <i>Bacteroidetes</i>       | <i>Bacteria</i> |
| Otu1027 | 0.2                                       | 0                              | 0.05              | 0.49                  | 0.08                | 67.41                | unclass. <i>Epsilonproteobacteria</i> | unclass. <i>Epsilonproteobacteria</i> | unclass. <i>Epsilonproteobacteria</i> | <i>Epsilonproteobacteria</i>  | <i>Proteobacteria</i>      | <i>Bacteria</i> |
| Otu1137 | 0.2                                       | 0                              | 0.05              | 0.49                  | 0.08                | 67.49                | unclass. <i>Gammaproteobacteria</i>   | unclass. <i>Gammaproteobacteria</i>   | unclass. <i>Gammaproteobacteria</i>   | <i>Gammaproteobacteria</i>    | <i>Proteobacteria</i>      | <i>Bacteria</i> |
| Otu1180 | 0.2                                       | 0                              | 0.05              | 0.49                  | 0.08                | 67.57                | unclass. <i>Nitrosomonadaceae</i>     | <i>Nitrosomonadaceae</i>              | <i>Nitrosomonadales</i>               | <i>Betaproteobacteria</i>     | <i>Proteobacteria</i>      | <i>Bacteria</i> |
| Otu1211 | 0.2                                       | 0                              | 0.05              | 0.49                  | 0.08                | 67.65                | unclass. <i>Oceanospirillaceae</i>    | <i>Oceanospirillaceae</i>             | <i>Oceanospirillales</i>              | <i>Gammaproteobacteria</i>    | <i>Proteobacteria</i>      | <i>Bacteria</i> |
| Otu1587 | 0.2                                       | 0                              | 0.05              | 0.49                  | 0.08                | 67.73                | unclass. <i>Bacteria</i>              | unclass. <i>Bacteria</i>              | unclass. <i>Bacteria</i>              | unclass. <i>Bacteria</i>      | unclass. <i>Bacteria</i>   | <i>Bacteria</i> |
| Otu1774 | 0.2                                       | 0                              | 0.05              | 0.49                  | 0.08                | 67.81                | unclass. <i>Flavobacteriaceae</i>     | <i>Flavobacteriaceae</i>              | <i>Flavobacteriales</i>               | <i>Flavobacteria</i>          | <i>Bacteroidetes</i>       | <i>Bacteria</i> |
| Otu1880 | 0.2                                       | 0                              | 0.05              | 0.49                  | 0.08                | 67.89                | unclass. <i>Bacteria</i>              | unclass. <i>Bacteria</i>              | unclass. <i>Bacteria</i>              | unclass. <i>Bacteria</i>      | unclass. <i>Bacteria</i>   | <i>Bacteria</i> |
| Otu1881 | 0.2                                       | 0                              | 0.05              | 0.49                  | 0.08                | 67.97                | unclass. <i>Bacteria</i>              | unclass. <i>Bacteria</i>              | unclass. <i>Bacteria</i>              | unclass. <i>Bacteria</i>      | unclass. <i>Bacteria</i>   | <i>Bacteria</i> |
| Otu1882 | 0.2                                       | 0                              | 0.05              | 0.49                  | 0.08                | 68.05                | <i>Truepera</i>                       | <i>Trueperaceae</i>                   | <i>Deinococcales</i>                  | <i>Deinococci</i>             | <i>Deinococcus-Thermus</i> | <i>Bacteria</i> |
| Otu1885 | 0.2                                       | 0                              | 0.05              | 0.49                  | 0.08                | 68.13                | unclass. <i>Gammaproteobacteria</i>   | unclass. <i>Gammaproteobacteria</i>   | unclass. <i>Gammaproteobacteria</i>   | <i>Gammaproteobacteria</i>    | <i>Proteobacteria</i>      | <i>Bacteria</i> |
| Otu1886 | 0.2                                       | 0                              | 0.05              | 0.49                  | 0.08                | 68.21                | unclass. <i>Bacteria</i>              | unclass. <i>Bacteria</i>              | unclass. <i>Bacteria</i>              | unclass. <i>Bacteria</i>      | unclass. <i>Bacteria</i>   | <i>Bacteria</i> |
| Otu1891 | 0.2                                       | 0                              | 0.05              | 0.49                  | 0.08                | 68.29                | unclass. <i>Flavobacteriales</i>      | unclass. <i>Flavobacteriales</i>      | <i>Flavobacteriales</i>               | <i>Flavobacteria</i>          | <i>Bacteroidetes</i>       | <i>Bacteria</i> |
| Otu1892 | 0.2                                       | 0                              | 0.05              | 0.49                  | 0.08                | 68.36                | unclass. <i>Bacteroidetes</i>         | unclass. <i>Bacteroidetes</i>         | unclass. <i>Bacteroidetes</i>         | unclass. <i>Bacteroidetes</i> | <i>Bacteroidetes</i>       | <i>Bacteria</i> |
| Otu1896 | 0.2                                       | 0                              | 0.05              | 0.49                  | 0.08                | 68.44                | unclass. <i>Gammaproteobacteria</i>   | unclass. <i>Gammaproteobacteria</i>   | unclass. <i>Gammaproteobacteria</i>   | <i>Gammaproteobacteria</i>    | <i>Proteobacteria</i>      | <i>Bacteria</i> |

| OTU     | Av.A <sub>i</sub><br>(pH <i>in situ</i> ) | Av.A <sub>i</sub><br>(pH 7.67) | Av.δ <sub>i</sub> | Av.δ <sub>i</sub> /SD | Av.δ <sub>i</sub> % | ΣAv.δ <sub>i</sub> % | Genus                                     | Family                                           | Order                               | Class                         | Phylum                   | Domain   |
|---------|-------------------------------------------|--------------------------------|-------------------|-----------------------|---------------------|----------------------|-------------------------------------------|--------------------------------------------------|-------------------------------------|-------------------------------|--------------------------|----------|
| Otu1898 | 0.2                                       | 0                              | 0.05              | 0.49                  | 0.08                | 68.52                | <i>Winogradskyella</i>                    | Flavobacteriaceae                                | Flavobacteriales                    | Flavobacteria                 | Bacteroidetes            | Bacteria |
| Otu1899 | 0.2                                       | 0                              | 0.05              | 0.49                  | 0.08                | 68.6                 | unclass.<br><i>Ectothiorhodospiraceae</i> | Ectothiorhodospiraceae                           | Chromatiales                        | Gammaproteobacteria           | Proteobacteria           | Bacteria |
| Otu1900 | 0.2                                       | 0                              | 0.05              | 0.49                  | 0.08                | 68.68                | unclass. <i>Flavobacteriaceae</i>         | Flavobacteriaceae                                | Flavobacteriales                    | Flavobacteria                 | Bacteroidetes            | Bacteria |
| Otu1901 | 0.2                                       | 0                              | 0.05              | 0.49                  | 0.08                | 68.76                | <i>Glaciecola</i>                         | Alteromonadaceae                                 | Alteromonadales                     | Gammaproteobacteria           | Proteobacteria           | Bacteria |
| Otu1902 | 0.2                                       | 0                              | 0.05              | 0.49                  | 0.08                | 68.84                | unclass. <i>Bacteria</i>                  | unclass. <i>Bacteria</i>                         | unclass. <i>Bacteria</i>            | unclass. <i>Bacteria</i>      | unclass. <i>Bacteria</i> | Bacteria |
| Otu1903 | 0.2                                       | 0                              | 0.05              | 0.49                  | 0.08                | 68.92                | unclass. <i>Flavobacteriales</i>          | unclass. <i>Flavobacteriales</i>                 | Flavobacteriales                    | Flavobacteria                 | Bacteroidetes            | Bacteria |
| Otu1904 | 0.2                                       | 0                              | 0.05              | 0.49                  | 0.08                | 69                   | unclass. <i>Flavobacteriales</i>          | unclass. <i>Flavobacteriales</i>                 | Flavobacteriales                    | Flavobacteria                 | Bacteroidetes            | Bacteria |
| Otu1905 | 0.2                                       | 0                              | 0.05              | 0.49                  | 0.08                | 69.08                | <i>Dasania</i>                            | <i>Pseudomonadales_incertae_se</i><br><i>dis</i> | Pseudomonadales                     | Gammaproteobacteria           | Proteobacteria           | Bacteria |
| Otu1906 | 0.2                                       | 0                              | 0.05              | 0.49                  | 0.08                | 69.16                | unclass. <i>Bacteria</i>                  | unclass. <i>Bacteria</i>                         | unclass. <i>Bacteria</i>            | unclass. <i>Bacteria</i>      | unclass. <i>Bacteria</i> | Bacteria |
| Otu0080 | 0                                         | 0.2                            | 0.05              | 0.49                  | 0.08                | 69.24                | <i>Polaribacter</i>                       | Flavobacteriaceae                                | Flavobacteriales                    | Flavobacteria                 | Bacteroidetes            | Bacteria |
| Otu0161 | 0                                         | 0.2                            | 0.05              | 0.49                  | 0.08                | 69.32                | unclass. <i>Flavobacteriales</i>          | unclass. <i>Flavobacteriales</i>                 | Flavobacteriales                    | Flavobacteria                 | Bacteroidetes            | Bacteria |
| Otu0288 | 0                                         | 0.2                            | 0.05              | 0.49                  | 0.08                | 69.4                 | <i>Ulvibacter</i>                         | Flavobacteriaceae                                | Flavobacteriales                    | Flavobacteria                 | Bacteroidetes            | Bacteria |
| Otu0329 | 0                                         | 0.2                            | 0.05              | 0.49                  | 0.08                | 69.48                | <i>Gaetbulibacter</i>                     | Flavobacteriaceae                                | Flavobacteriales                    | Flavobacteria                 | Bacteroidetes            | Bacteria |
| Otu0372 | 0                                         | 0.2                            | 0.05              | 0.49                  | 0.08                | 69.55                | unclass. <i>Flavobacteriaceae</i>         | Flavobacteriaceae                                | Flavobacteriales                    | Flavobacteria                 | Bacteroidetes            | Bacteria |
| Otu0377 | 0                                         | 0.2                            | 0.05              | 0.49                  | 0.08                | 69.63                | <i>Reichenbachiella</i>                   | Flammeovirgaceae                                 | Sphingobacteriales                  | Sphingobacteria               | Bacteroidetes            | Bacteria |
| Otu0446 | 0                                         | 0.2                            | 0.05              | 0.49                  | 0.08                | 69.71                | unclass. <i>Bacteroidetes</i>             | unclass. <i>Bacteroidetes</i>                    | unclass. <i>Bacteroidetes</i>       | unclass. <i>Bacteroidetes</i> | Bacteroidetes            | Bacteria |
| Otu0481 | 0                                         | 0.2                            | 0.05              | 0.49                  | 0.08                | 69.79                | <i>Haliea</i>                             | Alteromonadaceae                                 | Alteromonadales                     | Gammaproteobacteria           | Proteobacteria           | Bacteria |
| Otu0482 | 0                                         | 0.2                            | 0.05              | 0.49                  | 0.08                | 69.87                | unclass. <i>Microbacteriaceae</i>         | Microbacteriaceae                                | Actinomycetales                     | Actinobacteria                | Actinobacteria           | Bacteria |
| Otu0724 | 0                                         | 0.2                            | 0.05              | 0.49                  | 0.08                | 69.95                | unclass. <i>Bacteria</i>                  | unclass. <i>Bacteria</i>                         | unclass. <i>Bacteria</i>            | unclass. <i>Bacteria</i>      | unclass. <i>Bacteria</i> | Bacteria |
| Otu1328 | 0                                         | 0.2                            | 0.05              | 0.49                  | 0.08                | 70.03                | unclass. <i>Gammaproteobacteria</i>       | unclass. <i>Gammaproteobacteria</i>              | unclass. <i>Gammaproteobacteria</i> | Gammaproteobacteria           | Proteobacteria           | Bacteria |
| Otu1371 | 0                                         | 0.2                            | 0.05              | 0.49                  | 0.08                | 70.11                | <i>Haliea</i>                             | Alteromonadaceae                                 | Alteromonadales                     | Gammaproteobacteria           | Proteobacteria           | Bacteria |
| Otu1581 | 0                                         | 0.2                            | 0.05              | 0.49                  | 0.08                | 70.19                | unclass. <i>Deltaproteobacteria</i>       | unclass. <i>Deltaproteobacteria</i>              | unclass. <i>Deltaproteobacteria</i> | Deltaproteobacteria           | Proteobacteria           | Bacteria |
| Otu1688 | 0                                         | 0.2                            | 0.05              | 0.49                  | 0.08                | 70.27                | unclass. <i>Saprospiraceae</i>            | Saprospiraceae                                   | Sphingobacteriales                  | Sphingobacteria               | Bacteroidetes            | Bacteria |
| Otu1749 | 0                                         | 0.2                            | 0.05              | 0.49                  | 0.08                | 70.35                | unclass. <i>Gammaproteobacteria</i>       | unclass. <i>Gammaproteobacteria</i>              | unclass. <i>Gammaproteobacteria</i> | Gammaproteobacteria           | Proteobacteria           | Bacteria |
| Otu1895 | 0                                         | 0.2                            | 0.05              | 0.49                  | 0.08                | 70.43                | unclass. <i>Flavobacteriales</i>          | unclass. <i>Flavobacteriales</i>                 | Flavobacteriales                    | Flavobacteria                 | Bacteroidetes            | Bacteria |
| Otu2043 | 0                                         | 0.2                            | 0.05              | 0.49                  | 0.08                | 70.51                | <i>Cellulophaga</i>                       | Flavobacteriaceae                                | Flavobacteriales                    | Flavobacteria                 | Bacteroidetes            | Bacteria |
| Otu2044 | 0                                         | 0.2                            | 0.05              | 0.49                  | 0.08                | 70.59                | unclass. <i>Alphaproteobacteria</i>       | unclass. <i>Alphaproteobacteria</i>              | unclass. <i>Alphaproteobacteria</i> | Alphaproteobacteria           | Proteobacteria           | Bacteria |

| OTU     | Av.A <sub>i</sub><br>(pH <i>in situ</i> ) | Av.A <sub>i</sub><br>(pH 7.67) | Av.δ <sub>i</sub> | Av.δ <sub>i</sub> /SD | Av.δ <sub>i</sub> % | ΣAv.δ <sub>i</sub> % | Genus                               | Family                              | Order                               | Class                          | Phylum                   | Domain          |
|---------|-------------------------------------------|--------------------------------|-------------------|-----------------------|---------------------|----------------------|-------------------------------------|-------------------------------------|-------------------------------------|--------------------------------|--------------------------|-----------------|
| Otu2045 | 0                                         | 0.2                            | 0.05              | 0.49                  | 0.08                | 70.66                | unclass. <i>Bacteria</i>            | unclass. <i>Bacteria</i>            | unclass. <i>Bacteria</i>            | unclass. <i>Bacteria</i>       | unclass. <i>Bacteria</i> | <i>Bacteria</i> |
| Otu2046 | 0                                         | 0.2                            | 0.05              | 0.49                  | 0.08                | 70.74                | unclass. <i>Bacteria</i>            | unclass. <i>Bacteria</i>            | unclass. <i>Bacteria</i>            | unclass. <i>Bacteria</i>       | unclass. <i>Bacteria</i> | <i>Bacteria</i> |
| Otu2047 | 0                                         | 0.2                            | 0.05              | 0.49                  | 0.08                | 70.82                | unclass. <i>Bacteria</i>            | unclass. <i>Bacteria</i>            | unclass. <i>Bacteria</i>            | unclass. <i>Bacteria</i>       | unclass. <i>Bacteria</i> | <i>Bacteria</i> |
| Otu2048 | 0                                         | 0.2                            | 0.05              | 0.49                  | 0.08                | 70.9                 | <i>Pseudonocardia</i>               | <i>Pseudonocardiaceae</i>           | <i>Actinomycetales</i>              | <i>Actinobacteria</i>          | <i>Actinobacteria</i>    | <i>Bacteria</i> |
| Otu2049 | 0                                         | 0.2                            | 0.05              | 0.49                  | 0.08                | 70.98                | unclass. <i>Gammaproteobacteria</i> | unclass. <i>Gammaproteobacteria</i> | unclass. <i>Gammaproteobacteria</i> | <i>Gammaproteobacteria</i>     | <i>Proteobacteria</i>    | <i>Bacteria</i> |
| Otu2050 | 0                                         | 0.2                            | 0.05              | 0.49                  | 0.08                | 71.06                | unclass. <i>Bacteria</i>            | unclass. <i>Bacteria</i>            | unclass. <i>Bacteria</i>            | unclass. <i>Bacteria</i>       | unclass. <i>Bacteria</i> | <i>Bacteria</i> |
| Otu2051 | 0                                         | 0.2                            | 0.05              | 0.49                  | 0.08                | 71.14                | unclass. <i>Flavobacteriales</i>    | unclass. <i>Flavobacteriales</i>    | <i>Flavobacteriales</i>             | <i>Flavobacteria</i>           | <i>Bacteroidetes</i>     | <i>Bacteria</i> |
| Otu2052 | 0                                         | 0.2                            | 0.05              | 0.49                  | 0.08                | 71.22                | <i>Sneathiella</i>                  | <i>Sneathiellaceae</i>              | <i>Sneathiellales</i>               | <i>Alphaproteobacteria</i>     | <i>Proteobacteria</i>    | <i>Bacteria</i> |
| Otu2053 | 0                                         | 0.2                            | 0.05              | 0.49                  | 0.08                | 71.3                 | unclass. <i>Gammaproteobacteria</i> | unclass. <i>Gammaproteobacteria</i> | unclass. <i>Gammaproteobacteria</i> | <i>Gammaproteobacteria</i>     | <i>Proteobacteria</i>    | <i>Bacteria</i> |
| Otu2054 | 0                                         | 0.2                            | 0.05              | 0.49                  | 0.08                | 71.38                | unclass. <i>Proteobacteria</i>      | unclass. <i>Proteobacteria</i>      | unclass. <i>Proteobacteria</i>      | unclass. <i>Proteobacteria</i> | <i>Proteobacteria</i>    | <i>Bacteria</i> |
| Otu2055 | 0                                         | 0.2                            | 0.05              | 0.49                  | 0.08                | 71.46                | <i>Glaciecola</i>                   | <i>Alteromonadaceae</i>             | <i>Alteromonadales</i>              | <i>Gammaproteobacteria</i>     | <i>Proteobacteria</i>    | <i>Bacteria</i> |
| Otu2056 | 0                                         | 0.2                            | 0.05              | 0.49                  | 0.08                | 71.54                | unclass. <i>Bacteroidetes</i>       | unclass. <i>Bacteroidetes</i>       | unclass. <i>Bacteroidetes</i>       | unclass. <i>Bacteroidetes</i>  | <i>Bacteroidetes</i>     | <i>Bacteria</i> |
| Otu2057 | 0                                         | 0.2                            | 0.05              | 0.49                  | 0.08                | 71.62                | unclass. <i>Gammaproteobacteria</i> | unclass. <i>Gammaproteobacteria</i> | unclass. <i>Gammaproteobacteria</i> | <i>Gammaproteobacteria</i>     | <i>Proteobacteria</i>    | <i>Bacteria</i> |
| Otu2058 | 0                                         | 0.2                            | 0.05              | 0.49                  | 0.08                | 71.7                 | unclass. <i>Rhodobacteraceae</i>    | <i>Rhodobacteraceae</i>             | <i>Rhodobacterales</i>              | <i>Alphaproteobacteria</i>     | <i>Proteobacteria</i>    | <i>Bacteria</i> |
| Otu2059 | 0                                         | 0.2                            | 0.05              | 0.49                  | 0.08                | 71.77                | unclass. <i>Rhizobiales</i>         | unclass. <i>Rhizobiales</i>         | <i>Rhizobiales</i>                  | <i>Alphaproteobacteria</i>     | <i>Proteobacteria</i>    | <i>Bacteria</i> |
| Otu2060 | 0                                         | 0.2                            | 0.05              | 0.49                  | 0.08                | 71.85                | unclass. <i>Chromatiales</i>        | unclass. <i>Chromatiales</i>        | <i>Chromatiales</i>                 | <i>Gammaproteobacteria</i>     | <i>Proteobacteria</i>    | <i>Bacteria</i> |
| Otu2061 | 0                                         | 0.2                            | 0.05              | 0.49                  | 0.08                | 71.93                | unclass. <i>Anaerolineaceae</i>     | <i>Anaerolineaceae</i>              | <i>Anaerolineales</i>               | <i>Anaerolineae</i>            | <i>Chloroflexi</i>       | <i>Bacteria</i> |
| Otu2062 | 0                                         | 0.2                            | 0.05              | 0.49                  | 0.08                | 72.01                | unclass. <i>Rhodobacteraceae</i>    | <i>Rhodobacteraceae</i>             | <i>Rhodobacterales</i>              | <i>Alphaproteobacteria</i>     | <i>Proteobacteria</i>    | <i>Bacteria</i> |
| Otu2063 | 0                                         | 0.2                            | 0.05              | 0.49                  | 0.08                | 72.09                | unclass. <i>Actinomycetales</i>     | unclass. <i>Actinomycetales</i>     | <i>Actinomycetales</i>              | <i>Actinobacteria</i>          | <i>Actinobacteria</i>    | <i>Bacteria</i> |
| Otu2064 | 0                                         | 0.2                            | 0.05              | 0.49                  | 0.08                | 72.17                | unclass. <i>Gammaproteobacteria</i> | unclass. <i>Gammaproteobacteria</i> | unclass. <i>Gammaproteobacteria</i> | <i>Gammaproteobacteria</i>     | <i>Proteobacteria</i>    | <i>Bacteria</i> |
| Otu2065 | 0                                         | 0.2                            | 0.05              | 0.49                  | 0.08                | 72.25                | unclass. <i>Bacteria</i>            | unclass. <i>Bacteria</i>            | unclass. <i>Bacteria</i>            | unclass. <i>Bacteria</i>       | unclass. <i>Bacteria</i> | <i>Bacteria</i> |
| Otu2066 | 0                                         | 0.2                            | 0.05              | 0.49                  | 0.08                | 72.33                | unclass. <i>Sphingobacteriales</i>  | unclass. <i>Sphingobacteriales</i>  | <i>Sphingobacteriales</i>           | <i>Sphingobacteria</i>         | <i>Bacteroidetes</i>     | <i>Bacteria</i> |
| Otu0011 | 0.2                                       | 0                              | 0.05              | 0.49                  | 0.08                | 72.41                | unclass. <i>Flavobacteriaceae</i>   | <i>Flavobacteriaceae</i>            | <i>Flavobacteriales</i>             | <i>Flavobacteria</i>           | <i>Bacteroidetes</i>     | <i>Bacteria</i> |
| Otu0088 | 0.2                                       | 0                              | 0.05              | 0.49                  | 0.08                | 72.48                | unclass. <i>Flavobacteriaceae</i>   | <i>Flavobacteriaceae</i>            | <i>Flavobacteriales</i>             | <i>Flavobacteria</i>           | <i>Bacteroidetes</i>     | <i>Bacteria</i> |
| Otu0150 | 0.2                                       | 0                              | 0.05              | 0.49                  | 0.08                | 72.56                | unclass. <i>Bacteria</i>            | unclass. <i>Bacteria</i>            | unclass. <i>Bacteria</i>            | unclass. <i>Bacteria</i>       | unclass. <i>Bacteria</i> | <i>Bacteria</i> |
| Otu0221 | 0.2                                       | 0                              | 0.05              | 0.49                  | 0.08                | 72.64                | unclass. <i>Flavobacteriaceae</i>   | <i>Flavobacteriaceae</i>            | <i>Flavobacteriales</i>             | <i>Flavobacteria</i>           | <i>Bacteroidetes</i>     | <i>Bacteria</i> |
| Otu0229 | 0.2                                       | 0                              | 0.05              | 0.49                  | 0.08                | 72.71                | unclass. <i>Saprospiraceae</i>      | <i>Saprospiraceae</i>               | <i>Sphingobacteriales</i>           | <i>Sphingobacteria</i>         | <i>Bacteroidetes</i>     | <i>Bacteria</i> |



| OTU     | Av.A <sub>i</sub><br>(pH <i>in situ</i> ) | Av.A <sub>i</sub><br>(pH 7.67) | Av.δ <sub>i</sub> | Av.δ <sub>i</sub> /SD | Av.δ <sub>i</sub> % | ΣAv.δ <sub>i</sub> % | Genus                               | Family                              | Order                               | Class                          | Phylum                   | Domain          |
|---------|-------------------------------------------|--------------------------------|-------------------|-----------------------|---------------------|----------------------|-------------------------------------|-------------------------------------|-------------------------------------|--------------------------------|--------------------------|-----------------|
| Otu0231 | 0.2                                       | 0                              | 0.05              | 0.49                  | 0.08                | 72.79                | unclass. <i>Gammaproteobacteria</i> | unclass. <i>Gammaproteobacteria</i> | unclass. <i>Gammaproteobacteria</i> | <i>Gammaproteobacteria</i>     | <i>Proteobacteria</i>    | <i>Bacteria</i> |
| Otu0238 | 0.2                                       | 0                              | 0.05              | 0.49                  | 0.08                | 72.87                | <i>Haliea</i>                       | <i>Alteromonadaceae</i>             | <i>Alteromonadales</i>              | <i>Gammaproteobacteria</i>     | <i>Proteobacteria</i>    | <i>Bacteria</i> |
| Otu0242 | 0.2                                       | 0                              | 0.05              | 0.49                  | 0.08                | 72.95                | unclass. <i>Gammaproteobacteria</i> | unclass. <i>Gammaproteobacteria</i> | unclass. <i>Gammaproteobacteria</i> | <i>Gammaproteobacteria</i>     | <i>Proteobacteria</i>    | <i>Bacteria</i> |
| Otu0302 | 0.2                                       | 0                              | 0.05              | 0.49                  | 0.08                | 73.02                | <i>Colwellia</i>                    | <i>Colwelliaceae</i>                | <i>Alteromonadales</i>              | <i>Gammaproteobacteria</i>     | <i>Proteobacteria</i>    | <i>Bacteria</i> |
| Otu0334 | 0.2                                       | 0                              | 0.05              | 0.49                  | 0.08                | 73.1                 | unclass. <i>Flavobacteriaceae</i>   | <i>Flavobacteriaceae</i>            | <i>Flavobacteriales</i>             | <i>Flavobacteria</i>           | <i>Bacteroidetes</i>     | <i>Bacteria</i> |
| Otu0335 | 0.2                                       | 0                              | 0.05              | 0.49                  | 0.08                | 73.18                | unclass. <i>Flavobacteriaceae</i>   | <i>Flavobacteriaceae</i>            | <i>Flavobacteriales</i>             | <i>Flavobacteria</i>           | <i>Bacteroidetes</i>     | <i>Bacteria</i> |
| Otu0565 | 0.2                                       | 0                              | 0.05              | 0.49                  | 0.08                | 73.25                | <i>Staphylococcus</i>               | <i>Staphylococcaceae</i>            | <i>Bacillales</i>                   | <i>Bacilli</i>                 | <i>Firmicutes</i>        | <i>Bacteria</i> |
| Otu0760 | 0.2                                       | 0                              | 0.05              | 0.49                  | 0.08                | 73.33                | unclass. <i>Bacteria</i>            | unclass. <i>Bacteria</i>            | unclass. <i>Bacteria</i>            | unclass. <i>Bacteria</i>       | unclass. <i>Bacteria</i> | <i>Bacteria</i> |
| Otu0780 | 0.2                                       | 0                              | 0.05              | 0.49                  | 0.08                | 73.41                | unclass. <i>Gammaproteobacteria</i> | unclass. <i>Gammaproteobacteria</i> | unclass. <i>Gammaproteobacteria</i> | <i>Gammaproteobacteria</i>     | <i>Proteobacteria</i>    | <i>Bacteria</i> |
| Otu0798 | 0.2                                       | 0                              | 0.05              | 0.49                  | 0.08                | 73.48                | unclass. <i>Gammaproteobacteria</i> | unclass. <i>Gammaproteobacteria</i> | unclass. <i>Gammaproteobacteria</i> | <i>Gammaproteobacteria</i>     | <i>Proteobacteria</i>    | <i>Bacteria</i> |
| Otu1052 | 0.2                                       | 0                              | 0.05              | 0.49                  | 0.08                | 73.56                | unclass. <i>Desulfobacteraceae</i>  | <i>Desulfobacteraceae</i>           | <i>Desulfobacterales</i>            | <i>Deltaproteobacteria</i>     | <i>Proteobacteria</i>    | <i>Bacteria</i> |
| Otu1115 | 0.2                                       | 0                              | 0.05              | 0.49                  | 0.08                | 73.64                | <i>Marinobacter</i>                 | <i>Alteromonadaceae</i>             | <i>Alteromonadales</i>              | <i>Gammaproteobacteria</i>     | <i>Proteobacteria</i>    | <i>Bacteria</i> |
| Otu1204 | 0.2                                       | 0                              | 0.05              | 0.49                  | 0.08                | 73.71                | unclass. <i>Bacteroidetes</i>       | unclass. <i>Bacteroidetes</i>       | unclass. <i>Bacteroidetes</i>       | unclass. <i>Bacteroidetes</i>  | <i>Bacteroidetes</i>     | <i>Bacteria</i> |
| Otu1246 | 0.2                                       | 0                              | 0.05              | 0.49                  | 0.08                | 73.79                | unclass. <i>Gammaproteobacteria</i> | unclass. <i>Gammaproteobacteria</i> | unclass. <i>Gammaproteobacteria</i> | <i>Gammaproteobacteria</i>     | <i>Proteobacteria</i>    | <i>Bacteria</i> |
| Otu1403 | 0.2                                       | 0                              | 0.05              | 0.49                  | 0.08                | 73.87                | unclass. <i>Bacteroidetes</i>       | unclass. <i>Bacteroidetes</i>       | unclass. <i>Bacteroidetes</i>       | unclass. <i>Bacteroidetes</i>  | <i>Bacteroidetes</i>     | <i>Bacteria</i> |
| Otu1620 | 0.2                                       | 0                              | 0.05              | 0.49                  | 0.08                | 73.95                | <i>Nitrospira</i>                   | <i>Nitrospiraceae</i>               | <i>Nitrospirales</i>                | <i>Nitrospira</i>              | <i>Nitrospira</i>        | <i>Bacteria</i> |
| Otu1741 | 0.2                                       | 0                              | 0.05              | 0.49                  | 0.08                | 74.02                | <i>Pelagibacter</i>                 | SAR11-clade                         | <i>Rickettsiales</i>                | <i>Alphaproteobacteria</i>     | <i>Proteobacteria</i>    | <i>Bacteria</i> |
| Otu1775 | 0.2                                       | 0                              | 0.05              | 0.49                  | 0.08                | 74.1                 | unclass. <i>Bacteria</i>            | unclass. <i>Bacteria</i>            | unclass. <i>Bacteria</i>            | unclass. <i>Bacteria</i>       | unclass. <i>Bacteria</i> | <i>Bacteria</i> |
| Otu1894 | 0.2                                       | 0                              | 0.05              | 0.49                  | 0.08                | 74.18                | <i>Colwellia</i>                    | <i>Colwelliaceae</i>                | <i>Alteromonadales</i>              | <i>Gammaproteobacteria</i>     | <i>Proteobacteria</i>    | <i>Bacteria</i> |
| Otu1911 | 0.2                                       | 0                              | 0.05              | 0.49                  | 0.08                | 74.25                | unclass. <i>Flavobacteriales</i>    | unclass. <i>Flavobacteriales</i>    | <i>Flavobacteriales</i>             | <i>Flavobacteria</i>           | <i>Bacteroidetes</i>     | <i>Bacteria</i> |
| Otu1912 | 0.2                                       | 0                              | 0.05              | 0.49                  | 0.08                | 74.33                | <i>Pelagibacter</i>                 | SAR11-clade                         | <i>Rickettsiales</i>                | <i>Alphaproteobacteria</i>     | <i>Proteobacteria</i>    | <i>Bacteria</i> |
| Otu1914 | 0.2                                       | 0                              | 0.05              | 0.49                  | 0.08                | 74.41                | <i>Microscilla</i>                  | <i>Cytophagaceae</i>                | <i>Sphingobacteriales</i>           | <i>Sphingobacteria</i>         | <i>Bacteroidetes</i>     | <i>Bacteria</i> |
| Otu1915 | 0.2                                       | 0                              | 0.05              | 0.49                  | 0.08                | 74.48                | unclass. <i>Proteobacteria</i>      | unclass. <i>Proteobacteria</i>      | unclass. <i>Proteobacteria</i>      | unclass. <i>Proteobacteria</i> | <i>Proteobacteria</i>    | <i>Bacteria</i> |
| Otu1917 | 0.2                                       | 0                              | 0.05              | 0.49                  | 0.08                | 74.56                | unclass. <i>Bacteria</i>            | unclass. <i>Bacteria</i>            | unclass. <i>Bacteria</i>            | unclass. <i>Bacteria</i>       | unclass. <i>Bacteria</i> | <i>Bacteria</i> |
| Otu1918 | 0.2                                       | 0                              | 0.05              | 0.49                  | 0.08                | 74.64                | unclass. <i>Flavobacteriaceae</i>   | <i>Flavobacteriaceae</i>            | <i>Flavobacteriales</i>             | <i>Flavobacteria</i>           | <i>Bacteroidetes</i>     | <i>Bacteria</i> |
| Otu1921 | 0.2                                       | 0                              | 0.05              | 0.49                  | 0.08                | 74.72                | unclass. <i>Bacteria</i>            | unclass. <i>Bacteria</i>            | unclass. <i>Bacteria</i>            | unclass. <i>Bacteria</i>       | unclass. <i>Bacteria</i> | <i>Bacteria</i> |
| Otu1924 | 0.2                                       | 0                              | 0.05              | 0.49                  | 0.08                | 74.79                | unclass. <i>Bacteria</i>            | unclass. <i>Bacteria</i>            | unclass. <i>Bacteria</i>            | unclass. <i>Bacteria</i>       | unclass. <i>Bacteria</i> | <i>Bacteria</i> |

| OTU     | Av.A <sub>i</sub><br>(pH <i>in situ</i> ) | Av.A <sub>i</sub><br>(pH 7.67) | Av.δ <sub>i</sub> | Av.δ <sub>i</sub> /SD | Av.δ <sub>i</sub> % | ΣAv.δ <sub>i</sub> % | Genus                               | Family                              | Order                               | Class                         | Phylum                   | Domain          |
|---------|-------------------------------------------|--------------------------------|-------------------|-----------------------|---------------------|----------------------|-------------------------------------|-------------------------------------|-------------------------------------|-------------------------------|--------------------------|-----------------|
| Otu1925 | 0.2                                       | 0                              | 0.05              | 0.49                  | 0.08                | 74.87                | unclass. <i>Gammaproteobacteria</i> | unclass. <i>Gammaproteobacteria</i> | unclass. <i>Gammaproteobacteria</i> | <i>Gammaproteobacteria</i>    | <i>Proteobacteria</i>    | <i>Bacteria</i> |
| Otu1926 | 0.2                                       | 0                              | 0.05              | 0.49                  | 0.08                | 74.95                | unclass. <i>Flavobacteriaceae</i>   | <i>Flavobacteriaceae</i>            | <i>Flavobacteriales</i>             | <i>Flavobacteria</i>          | <i>Bacteroidetes</i>     | <i>Bacteria</i> |
| Otu1928 | 0.2                                       | 0                              | 0.05              | 0.49                  | 0.08                | 75.02                | unclass. <i>Flavobacteriales</i>    | unclass. <i>Flavobacteriales</i>    | <i>Flavobacteriales</i>             | <i>Flavobacteria</i>          | <i>Bacteroidetes</i>     | <i>Bacteria</i> |
| Otu1929 | 0.2                                       | 0                              | 0.05              | 0.49                  | 0.08                | 75.1                 | unclass. <i>OD1</i>                 | unclass. <i>OD1</i>                 | unclass. <i>OD1</i>                 | unclass. <i>OD1</i>           | <i>OD1</i>               | <i>Bacteria</i> |
| Otu1930 | 0.2                                       | 0                              | 0.05              | 0.49                  | 0.08                | 75.18                | unclass. <i>Flavobacteriaceae</i>   | <i>Flavobacteriaceae</i>            | <i>Flavobacteriales</i>             | <i>Flavobacteria</i>          | <i>Bacteroidetes</i>     | <i>Bacteria</i> |
| Otu1932 | 0.2                                       | 0                              | 0.05              | 0.49                  | 0.08                | 75.25                | unclass. <i>Bacteria</i>            | unclass. <i>Bacteria</i>            | unclass. <i>Bacteria</i>            | unclass. <i>Bacteria</i>      | unclass. <i>Bacteria</i> | <i>Bacteria</i> |
| Otu1933 | 0.2                                       | 0                              | 0.05              | 0.49                  | 0.08                | 75.33                | unclass. <i>Flavobacteriaceae</i>   | <i>Flavobacteriaceae</i>            | <i>Flavobacteriales</i>             | <i>Flavobacteria</i>          | <i>Bacteroidetes</i>     | <i>Bacteria</i> |
| Otu1934 | 0.2                                       | 0                              | 0.05              | 0.49                  | 0.08                | 75.41                | unclass. <i>Flavobacteriaceae</i>   | <i>Flavobacteriaceae</i>            | <i>Flavobacteriales</i>             | <i>Flavobacteria</i>          | <i>Bacteroidetes</i>     | <i>Bacteria</i> |
| Otu1936 | 0.2                                       | 0                              | 0.05              | 0.49                  | 0.08                | 75.49                | unclass. <i>Gammaproteobacteria</i> | unclass. <i>Gammaproteobacteria</i> | unclass. <i>Gammaproteobacteria</i> | <i>Gammaproteobacteria</i>    | <i>Proteobacteria</i>    | <i>Bacteria</i> |
| Otu1938 | 0.2                                       | 0                              | 0.05              | 0.49                  | 0.08                | 75.56                | unclass. <i>Planctomycetaceae</i>   | <i>Planctomycetaceae</i>            | <i>Planctomycetales</i>             | <i>Planctomycetacia</i>       | <i>Planctomycetes</i>    | <i>Bacteria</i> |
| Otu0102 | 0                                         | 0.2                            | 0.05              | 0.49                  | 0.08                | 75.64                | unclass. <i>Flavobacteriaceae</i>   | <i>Flavobacteriaceae</i>            | <i>Flavobacteriales</i>             | <i>Flavobacteria</i>          | <i>Bacteroidetes</i>     | <i>Bacteria</i> |
| Otu0251 | 0                                         | 0.2                            | 0.05              | 0.49                  | 0.08                | 75.72                | unclass. <i>Bacteroidetes</i>       | unclass. <i>Bacteroidetes</i>       | unclass. <i>Bacteroidetes</i>       | unclass. <i>Bacteroidetes</i> | <i>Bacteroidetes</i>     | <i>Bacteria</i> |
| Otu0258 | 0                                         | 0.2                            | 0.05              | 0.49                  | 0.08                | 75.79                | <i>Haliea</i>                       | <i>Alteromonadaceae</i>             | <i>Alteromonadales</i>              | <i>Gammaproteobacteria</i>    | <i>Proteobacteria</i>    | <i>Bacteria</i> |
| Otu0280 | 0                                         | 0.2                            | 0.05              | 0.49                  | 0.08                | 75.87                | <i>Marinobacter</i>                 | <i>Alteromonadaceae</i>             | <i>Alteromonadales</i>              | <i>Gammaproteobacteria</i>    | <i>Proteobacteria</i>    | <i>Bacteria</i> |
| Otu0300 | 0                                         | 0.2                            | 0.05              | 0.49                  | 0.08                | 75.95                | unclass. <i>Gammaproteobacteria</i> | unclass. <i>Gammaproteobacteria</i> | unclass. <i>Gammaproteobacteria</i> | <i>Gammaproteobacteria</i>    | <i>Proteobacteria</i>    | <i>Bacteria</i> |
| Otu0382 | 0                                         | 0.2                            | 0.05              | 0.49                  | 0.08                | 76.02                | unclass. <i>Flavobacteriales</i>    | unclass. <i>Flavobacteriales</i>    | <i>Flavobacteriales</i>             | <i>Flavobacteria</i>          | <i>Bacteroidetes</i>     | <i>Bacteria</i> |
| Otu0670 | 0                                         | 0.2                            | 0.05              | 0.49                  | 0.08                | 76.1                 | unclass. <i>Flavobacteriaceae</i>   | <i>Flavobacteriaceae</i>            | <i>Flavobacteriales</i>             | <i>Flavobacteria</i>          | <i>Bacteroidetes</i>     | <i>Bacteria</i> |
| Otu0721 | 0                                         | 0.2                            | 0.05              | 0.49                  | 0.08                | 76.18                | unclass. <i>Alphaproteobacteria</i> | unclass. <i>Alphaproteobacteria</i> | unclass. <i>Alphaproteobacteria</i> | <i>Alphaproteobacteria</i>    | <i>Proteobacteria</i>    | <i>Bacteria</i> |
| Otu0857 | 0                                         | 0.2                            | 0.05              | 0.49                  | 0.08                | 76.25                | unclass. <i>Flavobacteriaceae</i>   | <i>Flavobacteriaceae</i>            | <i>Flavobacteriales</i>             | <i>Flavobacteria</i>          | <i>Bacteroidetes</i>     | <i>Bacteria</i> |
| Otu1157 | 0                                         | 0.2                            | 0.05              | 0.49                  | 0.08                | 76.33                | unclass. <i>Flavobacteriaceae</i>   | <i>Flavobacteriaceae</i>            | <i>Flavobacteriales</i>             | <i>Flavobacteria</i>          | <i>Bacteroidetes</i>     | <i>Bacteria</i> |
| Otu1332 | 0                                         | 0.2                            | 0.05              | 0.49                  | 0.08                | 76.41                | unclass. <i>Gammaproteobacteria</i> | unclass. <i>Gammaproteobacteria</i> | unclass. <i>Gammaproteobacteria</i> | <i>Gammaproteobacteria</i>    | <i>Proteobacteria</i>    | <i>Bacteria</i> |
| Otu1341 | 0                                         | 0.2                            | 0.05              | 0.49                  | 0.08                | 76.49                | unclass. <i>Gammaproteobacteria</i> | unclass. <i>Gammaproteobacteria</i> | unclass. <i>Gammaproteobacteria</i> | <i>Gammaproteobacteria</i>    | <i>Proteobacteria</i>    | <i>Bacteria</i> |
| Otu1556 | 0                                         | 0.2                            | 0.05              | 0.49                  | 0.08                | 76.56                | unclass. <i>Sphingobacteriales</i>  | unclass. <i>Sphingobacteriales</i>  | <i>Sphingobacteriales</i>           | <i>Sphingobacteria</i>        | <i>Bacteroidetes</i>     | <i>Bacteria</i> |
| Otu1674 | 0                                         | 0.2                            | 0.05              | 0.49                  | 0.08                | 76.64                | unclass. <i>Bacteria</i>            | unclass. <i>Bacteria</i>            | unclass. <i>Bacteria</i>            | unclass. <i>Bacteria</i>      | unclass. <i>Bacteria</i> | <i>Bacteria</i> |
| Otu1695 | 0                                         | 0.2                            | 0.05              | 0.49                  | 0.08                | 76.72                | <i>Balneola</i>                     | <i>Chitinophagaceae</i>             | <i>Sphingobacteriales</i>           | <i>Sphingobacteria</i>        | <i>Bacteroidetes</i>     | <i>Bacteria</i> |
| Otu1758 | 0                                         | 0.2                            | 0.05              | 0.49                  | 0.08                | 76.79                | unclass. <i>Deltaproteobacteria</i> | unclass. <i>Deltaproteobacteria</i> | unclass. <i>Deltaproteobacteria</i> | <i>Deltaproteobacteria</i>    | <i>Proteobacteria</i>    | <i>Bacteria</i> |
| Otu1769 | 0                                         | 0.2                            | 0.05              | 0.49                  | 0.08                | 76.87                | unclass. <i>Flavobacteriaceae</i>   | <i>Flavobacteriaceae</i>            | <i>Flavobacteriales</i>             | <i>Flavobacteria</i>          | <i>Bacteroidetes</i>     | <i>Bacteria</i> |

| OTU     | Av.A <sub>i</sub><br>(pH <i>in situ</i> ) | Av.A <sub>i</sub><br>(pH 7.67) | Av.δ <sub>i</sub> | Av.δ <sub>i</sub> /SD | Av.δ <sub>i</sub> % | ΣAv.δ <sub>i</sub> % | Genus                               | Family                              | Order                               | Class                          | Phylum                   | Domain          |
|---------|-------------------------------------------|--------------------------------|-------------------|-----------------------|---------------------|----------------------|-------------------------------------|-------------------------------------|-------------------------------------|--------------------------------|--------------------------|-----------------|
| Otu1791 | 0                                         | 0.2                            | 0.05              | 0.49                  | 0.08                | 76.95                | <i>Colwellia</i>                    | <i>Colwelliaceae</i>                | <i>Alteromonadales</i>              | <i>Gammaproteobacteria</i>     | <i>Proteobacteria</i>    | <i>Bacteria</i> |
| Otu2068 | 0                                         | 0.2                            | 0.05              | 0.49                  | 0.08                | 77.02                | unclass. <i>Alphaproteobacteria</i> | unclass. <i>Alphaproteobacteria</i> | unclass. <i>Alphaproteobacteria</i> | <i>Alphaproteobacteria</i>     | <i>Proteobacteria</i>    | <i>Bacteria</i> |
| Otu2069 | 0                                         | 0.2                            | 0.05              | 0.49                  | 0.08                | 77.1                 | <i>Colwellia</i>                    | <i>Colwelliaceae</i>                | <i>Alteromonadales</i>              | <i>Gammaproteobacteria</i>     | <i>Proteobacteria</i>    | <i>Bacteria</i> |
| Otu2070 | 0                                         | 0.2                            | 0.05              | 0.49                  | 0.08                | 77.18                | unclass. <i>Bacteria</i>            | unclass. <i>Bacteria</i>            | unclass. <i>Bacteria</i>            | unclass. <i>Bacteria</i>       | unclass. <i>Bacteria</i> | <i>Bacteria</i> |
| Otu2071 | 0                                         | 0.2                            | 0.05              | 0.49                  | 0.08                | 77.25                | unclass. <i>Bacteria</i>            | unclass. <i>Bacteria</i>            | unclass. <i>Bacteria</i>            | unclass. <i>Bacteria</i>       | unclass. <i>Bacteria</i> | <i>Bacteria</i> |
| Otu2072 | 0                                         | 0.2                            | 0.05              | 0.49                  | 0.08                | 77.33                | unclass. <i>Desulfobacteraceae</i>  | <i>Desulfobacteraceae</i>           | <i>Desulfobacterales</i>            | <i>Deltaproteobacteria</i>     | <i>Proteobacteria</i>    | <i>Bacteria</i> |
| Otu2073 | 0                                         | 0.2                            | 0.05              | 0.49                  | 0.08                | 77.41                | <i>Rothia</i>                       | <i>Micrococcaceae</i>               | <i>Actinomycetales</i>              | <i>Actinobacteria</i>          | <i>Actinobacteria</i>    | <i>Bacteria</i> |
| Otu2074 | 0                                         | 0.2                            | 0.05              | 0.49                  | 0.08                | 77.49                | unclass. <i>Bacteria</i>            | unclass. <i>Bacteria</i>            | unclass. <i>Bacteria</i>            | unclass. <i>Bacteria</i>       | unclass. <i>Bacteria</i> | <i>Bacteria</i> |
| Otu2075 | 0                                         | 0.2                            | 0.05              | 0.49                  | 0.08                | 77.56                | unclass. <i>Chromatiales</i>        | unclass. <i>Chromatiales</i>        | <i>Chromatiales</i>                 | <i>Gammaproteobacteria</i>     | <i>Proteobacteria</i>    | <i>Bacteria</i> |
| Otu2076 | 0                                         | 0.2                            | 0.05              | 0.49                  | 0.08                | 77.64                | unclass. <i>Sphingobacteriales</i>  | unclass. <i>Sphingobacteriales</i>  | <i>Sphingobacteriales</i>           | <i>Sphingobacteria</i>         | <i>Bacteroidetes</i>     | <i>Bacteria</i> |
| Otu2077 | 0                                         | 0.2                            | 0.05              | 0.49                  | 0.08                | 77.72                | unclass. <i>Bacteroidetes</i>       | unclass. <i>Bacteroidetes</i>       | unclass. <i>Bacteroidetes</i>       | unclass. <i>Bacteroidetes</i>  | <i>Bacteroidetes</i>     | <i>Bacteria</i> |
| Otu2078 | 0                                         | 0.2                            | 0.05              | 0.49                  | 0.08                | 77.79                | unclass. <i>Proteobacteria</i>      | unclass. <i>Proteobacteria</i>      | unclass. <i>Proteobacteria</i>      | unclass. <i>Proteobacteria</i> | <i>Proteobacteria</i>    | <i>Bacteria</i> |
| Otu2079 | 0                                         | 0.2                            | 0.05              | 0.49                  | 0.08                | 77.87                | unclass. <i>Bacteria</i>            | unclass. <i>Bacteria</i>            | unclass. <i>Bacteria</i>            | unclass. <i>Bacteria</i>       | unclass. <i>Bacteria</i> | <i>Bacteria</i> |
| Otu2080 | 0                                         | 0.2                            | 0.05              | 0.49                  | 0.08                | 77.95                | unclass. <i>Bacteria</i>            | unclass. <i>Bacteria</i>            | unclass. <i>Bacteria</i>            | unclass. <i>Bacteria</i>       | unclass. <i>Bacteria</i> | <i>Bacteria</i> |
| Otu2081 | 0                                         | 0.2                            | 0.05              | 0.49                  | 0.08                | 78.02                | <i>Reichenbachiella</i>             | <i>Flammeovirgaceae</i>             | <i>Sphingobacteriales</i>           | <i>Sphingobacteria</i>         | <i>Bacteroidetes</i>     | <i>Bacteria</i> |
| Otu2082 | 0                                         | 0.2                            | 0.05              | 0.49                  | 0.08                | 78.1                 | unclass. <i>Bacteria</i>            | unclass. <i>Bacteria</i>            | unclass. <i>Bacteria</i>            | unclass. <i>Bacteria</i>       | unclass. <i>Bacteria</i> | <i>Bacteria</i> |
| Otu2083 | 0                                         | 0.2                            | 0.05              | 0.49                  | 0.08                | 78.18                | unclass. <i>Proteobacteria</i>      | unclass. <i>Proteobacteria</i>      | unclass. <i>Proteobacteria</i>      | unclass. <i>Proteobacteria</i> | <i>Proteobacteria</i>    | <i>Bacteria</i> |
| Otu2084 | 0                                         | 0.2                            | 0.05              | 0.49                  | 0.08                | 78.25                | unclass. <i>Bacteroidetes</i>       | unclass. <i>Bacteroidetes</i>       | unclass. <i>Bacteroidetes</i>       | unclass. <i>Bacteroidetes</i>  | <i>Bacteroidetes</i>     | <i>Bacteria</i> |
| Otu2085 | 0                                         | 0.2                            | 0.05              | 0.49                  | 0.08                | 78.33                | unclass. <i>Bacteria</i>            | unclass. <i>Bacteria</i>            | unclass. <i>Bacteria</i>            | unclass. <i>Bacteria</i>       | unclass. <i>Bacteria</i> | <i>Bacteria</i> |
| Otu2086 | 0                                         | 0.2                            | 0.05              | 0.49                  | 0.08                | 78.41                | unclass. <i>Proteobacteria</i>      | unclass. <i>Proteobacteria</i>      | unclass. <i>Proteobacteria</i>      | unclass. <i>Proteobacteria</i> | <i>Proteobacteria</i>    | <i>Bacteria</i> |
| Otu2087 | 0                                         | 0.2                            | 0.05              | 0.49                  | 0.08                | 78.48                | unclass. <i>Bacteria</i>            | unclass. <i>Bacteria</i>            | unclass. <i>Bacteria</i>            | unclass. <i>Bacteria</i>       | unclass. <i>Bacteria</i> | <i>Bacteria</i> |
| Otu2088 | 0                                         | 0.2                            | 0.05              | 0.49                  | 0.08                | 78.56                | unclass. <i>Bacteria</i>            | unclass. <i>Bacteria</i>            | unclass. <i>Bacteria</i>            | unclass. <i>Bacteria</i>       | unclass. <i>Bacteria</i> | <i>Bacteria</i> |
| Otu2089 | 0                                         | 0.2                            | 0.05              | 0.49                  | 0.08                | 78.64                | <i>Devosia</i>                      | <i>Hyphomicrobiaceae</i>            | <i>Rhizobiales</i>                  | <i>Alphaproteobacteria</i>     | <i>Proteobacteria</i>    | <i>Bacteria</i> |
| Otu2090 | 0                                         | 0.2                            | 0.05              | 0.49                  | 0.08                | 78.72                | unclass. <i>Bacteroidetes</i>       | unclass. <i>Bacteroidetes</i>       | unclass. <i>Bacteroidetes</i>       | unclass. <i>Bacteroidetes</i>  | <i>Bacteroidetes</i>     | <i>Bacteria</i> |
| Otu2092 | 0                                         | 0.2                            | 0.05              | 0.49                  | 0.08                | 78.79                | unclass. <i>Alphaproteobacteria</i> | unclass. <i>Alphaproteobacteria</i> | unclass. <i>Alphaproteobacteria</i> | <i>Alphaproteobacteria</i>     | <i>Proteobacteria</i>    | <i>Bacteria</i> |
| Otu2093 | 0                                         | 0.2                            | 0.05              | 0.49                  | 0.08                | 78.87                | unclass. <i>Sphingobacteriales</i>  | unclass. <i>Sphingobacteriales</i>  | <i>Sphingobacteriales</i>           | <i>Sphingobacteria</i>         | <i>Bacteroidetes</i>     | <i>Bacteria</i> |
| Otu2094 | 0                                         | 0.2                            | 0.05              | 0.49                  | 0.08                | 78.95                | unclass. <i>Oceanospirillaceae</i>  | <i>Oceanospirillaceae</i>           | <i>Oceanospirillales</i>            | <i>Gammaproteobacteria</i>     | <i>Proteobacteria</i>    | <i>Bacteria</i> |

| OTU     | Av.A <sub>i</sub><br>(pH <i>in situ</i> ) | Av.A <sub>i</sub><br>(pH 7.67) | Av.δ <sub>i</sub> | Av.δ <sub>i</sub> /SD | Av.δ <sub>i</sub> % | ΣAv.δ <sub>i</sub> % | Genus                               | Family                              | Order                               | Class                         | Phylum                   | Domain          |
|---------|-------------------------------------------|--------------------------------|-------------------|-----------------------|---------------------|----------------------|-------------------------------------|-------------------------------------|-------------------------------------|-------------------------------|--------------------------|-----------------|
| Otu2095 | 0                                         | 0.2                            | 0.05              | 0.49                  | 0.08                | 79.02                | <i>Colwellia</i>                    | <i>Colwelliaceae</i>                | <i>Alteromonadales</i>              | <i>Gammaproteobacteria</i>    | <i>Proteobacteria</i>    | <i>Bacteria</i> |
| Otu2096 | 0                                         | 0.2                            | 0.05              | 0.49                  | 0.08                | 79.1                 | unclass. <i>Bacteria</i>            | unclass. <i>Bacteria</i>            | unclass. <i>Bacteria</i>            | unclass. <i>Bacteria</i>      | unclass. <i>Bacteria</i> | <i>Bacteria</i> |
| Otu2097 | 0                                         | 0.2                            | 0.05              | 0.49                  | 0.08                | 79.18                | unclass. <i>OD1</i>                 | unclass. <i>OD1</i>                 | unclass. <i>OD1</i>                 | unclass. <i>OD1</i>           | <i>OD1</i>               | <i>Bacteria</i> |
| Otu0103 | 0                                         | 0.2                            | 0.05              | 0.49                  | 0.08                | 79.25                | <i>Pseudomonas</i>                  | <i>Pseudomonadaceae</i>             | <i>Pseudomonadales</i>              | <i>Gammaproteobacteria</i>    | <i>Proteobacteria</i>    | <i>Bacteria</i> |
| Otu0228 | 0                                         | 0.2                            | 0.05              | 0.49                  | 0.08                | 79.33                | <i>Jannaschia</i>                   | <i>Rhodobacteraceae</i>             | <i>Rhodobacterales</i>              | <i>Alphaproteobacteria</i>    | <i>Proteobacteria</i>    | <i>Bacteria</i> |
| Otu0297 | 0                                         | 0.2                            | 0.05              | 0.49                  | 0.08                | 79.41                | <i>Lutibacter</i>                   | <i>Flavobacteriaceae</i>            | <i>Flavobacteriales</i>             | <i>Flavobacteria</i>          | <i>Bacteroidetes</i>     | <i>Bacteria</i> |
| Otu0299 | 0                                         | 0.2                            | 0.05              | 0.49                  | 0.08                | 79.48                | unclass. <i>Rhodobacteraceae</i>    | <i>Rhodobacteraceae</i>             | <i>Rhodobacterales</i>              | <i>Alphaproteobacteria</i>    | <i>Proteobacteria</i>    | <i>Bacteria</i> |
| Otu0357 | 0                                         | 0.2                            | 0.05              | 0.49                  | 0.08                | 79.56                | <i>Sphingopyxis</i>                 | <i>Sphingomonadaceae</i>            | <i>Sphingomonadales</i>             | <i>Alphaproteobacteria</i>    | <i>Proteobacteria</i>    | <i>Bacteria</i> |
| Otu0520 | 0                                         | 0.2                            | 0.05              | 0.49                  | 0.08                | 79.64                | unclass. <i>Alphaproteobacteria</i> | unclass. <i>Alphaproteobacteria</i> | unclass. <i>Alphaproteobacteria</i> | <i>Alphaproteobacteria</i>    | <i>Proteobacteria</i>    | <i>Bacteria</i> |
| Otu0655 | 0                                         | 0.2                            | 0.05              | 0.49                  | 0.08                | 79.71                | <i>Maricaulis</i>                   | <i>Hyphomonadaceae</i>              | <i>Caulobacterales</i>              | <i>Alphaproteobacteria</i>    | <i>Proteobacteria</i>    | <i>Bacteria</i> |
| Otu0802 | 0                                         | 0.2                            | 0.05              | 0.49                  | 0.08                | 79.79                | unclass. <i>Flammeovirgaceae</i>    | <i>Flammeovirgaceae</i>             | <i>Sphingobacteriales</i>           | <i>Sphingobacteria</i>        | <i>Bacteroidetes</i>     | <i>Bacteria</i> |
| Otu0807 | 0                                         | 0.2                            | 0.05              | 0.49                  | 0.08                | 79.87                | unclass. <i>Bacteroidetes</i>       | unclass. <i>Bacteroidetes</i>       | unclass. <i>Bacteroidetes</i>       | unclass. <i>Bacteroidetes</i> | <i>Bacteroidetes</i>     | <i>Bacteria</i> |
| Otu1234 | 0                                         | 0.2                            | 0.05              | 0.49                  | 0.08                | 79.94                | unclass. <i>Oceanospirillaceae</i>  | <i>Oceanospirillaceae</i>           | <i>Oceanospirillales</i>            | <i>Gammaproteobacteria</i>    | <i>Proteobacteria</i>    | <i>Bacteria</i> |
| Otu1759 | 0                                         | 0.2                            | 0.05              | 0.49                  | 0.08                | 80.02                | unclass. <i>Campylobacteriales</i>  | unclass. <i>Campylobacteriales</i>  | <i>Campylobacteriales</i>           | <i>Epsilonproteobacteria</i>  | <i>Proteobacteria</i>    | <i>Bacteria</i> |
| Otu1768 | 0                                         | 0.2                            | 0.05              | 0.49                  | 0.08                | 80.1                 | unclass. <i>OD1</i>                 | unclass. <i>OD1</i>                 | unclass. <i>OD1</i>                 | unclass. <i>OD1</i>           | <i>OD1</i>               | <i>Bacteria</i> |
| Otu1869 | 0                                         | 0.2                            | 0.05              | 0.49                  | 0.08                | 80.17                | unclass. <i>Bacteroidetes</i>       | unclass. <i>Bacteroidetes</i>       | unclass. <i>Bacteroidetes</i>       | unclass. <i>Bacteroidetes</i> | <i>Bacteroidetes</i>     | <i>Bacteria</i> |
| Otu1884 | 0                                         | 0.2                            | 0.05              | 0.49                  | 0.08                | 80.25                | unclass. <i>Bacteria</i>            | unclass. <i>Bacteria</i>            | unclass. <i>Bacteria</i>            | unclass. <i>Bacteria</i>      | unclass. <i>Bacteria</i> | <i>Bacteria</i> |
| Otu1969 | 0                                         | 0.2                            | 0.05              | 0.49                  | 0.08                | 80.33                | unclass. <i>Bacteria</i>            | unclass. <i>Bacteria</i>            | unclass. <i>Bacteria</i>            | unclass. <i>Bacteria</i>      | unclass. <i>Bacteria</i> | <i>Bacteria</i> |
| Otu1970 | 0                                         | 0.2                            | 0.05              | 0.49                  | 0.08                | 80.4                 | <i>Desulfonema</i>                  | <i>Desulfobacteraceae</i>           | <i>Desulfobacteriales</i>           | <i>Deltaproteobacteria</i>    | <i>Proteobacteria</i>    | <i>Bacteria</i> |
| Otu1971 | 0                                         | 0.2                            | 0.05              | 0.49                  | 0.08                | 80.48                | unclass. <i>Flavobacteriales</i>    | unclass. <i>Flavobacteriales</i>    | <i>Flavobacteriales</i>             | <i>Flavobacteria</i>          | <i>Bacteroidetes</i>     | <i>Bacteria</i> |
| Otu1972 | 0                                         | 0.2                            | 0.05              | 0.49                  | 0.08                | 80.56                | unclass. <i>Flavobacteriaceae</i>   | <i>Flavobacteriaceae</i>            | <i>Flavobacteriales</i>             | <i>Flavobacteria</i>          | <i>Bacteroidetes</i>     | <i>Bacteria</i> |
| Otu1973 | 0                                         | 0.2                            | 0.05              | 0.49                  | 0.08                | 80.63                | unclass. <i>Flavobacteriales</i>    | unclass. <i>Flavobacteriales</i>    | <i>Flavobacteriales</i>             | <i>Flavobacteria</i>          | <i>Bacteroidetes</i>     | <i>Bacteria</i> |
| Otu1974 | 0                                         | 0.2                            | 0.05              | 0.49                  | 0.08                | 80.71                | <i>Oleispira</i>                    | <i>Oceanospirillaceae</i>           | <i>Oceanospirillales</i>            | <i>Gammaproteobacteria</i>    | <i>Proteobacteria</i>    | <i>Bacteria</i> |
| Otu1975 | 0                                         | 0.2                            | 0.05              | 0.49                  | 0.08                | 80.79                | unclass. <i>Gammaproteobacteria</i> | unclass. <i>Gammaproteobacteria</i> | unclass. <i>Gammaproteobacteria</i> | <i>Gammaproteobacteria</i>    | <i>Proteobacteria</i>    | <i>Bacteria</i> |
| Otu1976 | 0                                         | 0.2                            | 0.05              | 0.49                  | 0.08                | 80.86                | <i>Pelagibacter</i>                 | SAR11-clade                         | <i>Rickettsiales</i>                | <i>Alphaproteobacteria</i>    | <i>Proteobacteria</i>    | <i>Bacteria</i> |
| Otu1977 | 0                                         | 0.2                            | 0.05              | 0.49                  | 0.08                | 80.94                | unclass. <i>Bacteria</i>            | unclass. <i>Bacteria</i>            | unclass. <i>Bacteria</i>            | unclass. <i>Bacteria</i>      | unclass. <i>Bacteria</i> | <i>Bacteria</i> |
| Otu1978 | 0                                         | 0.2                            | 0.05              | 0.49                  | 0.08                | 81.02                | unclass. <i>Bacteroidetes</i>       | unclass. <i>Bacteroidetes</i>       | unclass. <i>Bacteroidetes</i>       | unclass. <i>Bacteroidetes</i> | <i>Bacteroidetes</i>     | <i>Bacteria</i> |

| OTU     | Av.A <sub>i</sub><br>(pH <i>in situ</i> ) | Av.A <sub>i</sub><br>(pH 7.67) | Av.δ <sub>i</sub> | Av.δ <sub>i</sub> /SD | Av.δ <sub>i</sub> % | ΣAv.δ <sub>i</sub> % | Genus                               | Family                              | Order                               | Class                         | Phylum                   | Domain          |
|---------|-------------------------------------------|--------------------------------|-------------------|-----------------------|---------------------|----------------------|-------------------------------------|-------------------------------------|-------------------------------------|-------------------------------|--------------------------|-----------------|
| Otu1979 | 0                                         | 0.2                            | 0.05              | 0.49                  | 0.08                | 81.09                | <i>Pelagibacter</i>                 | SAR11-clade                         | <i>Rickettsiales</i>                | <i>Alphaproteobacteria</i>    | <i>Proteobacteria</i>    | <i>Bacteria</i> |
| Otu1981 | 0                                         | 0.2                            | 0.05              | 0.49                  | 0.08                | 81.17                | unclass. <i>Bacteria</i>            | unclass. <i>Bacteria</i>            | unclass. <i>Bacteria</i>            | unclass. <i>Bacteria</i>      | unclass. <i>Bacteria</i> | <i>Bacteria</i> |
| Otu1982 | 0                                         | 0.2                            | 0.05              | 0.49                  | 0.08                | 81.25                | unclass. <i>Gammaproteobacteria</i> | unclass. <i>Gammaproteobacteria</i> | unclass. <i>Gammaproteobacteria</i> | <i>Gammaproteobacteria</i>    | <i>Proteobacteria</i>    | <i>Bacteria</i> |
| Otu1983 | 0                                         | 0.2                            | 0.05              | 0.49                  | 0.08                | 81.32                | unclass. <i>Gammaproteobacteria</i> | unclass. <i>Gammaproteobacteria</i> | unclass. <i>Gammaproteobacteria</i> | <i>Gammaproteobacteria</i>    | <i>Proteobacteria</i>    | <i>Bacteria</i> |
| Otu1984 | 0                                         | 0.2                            | 0.05              | 0.49                  | 0.08                | 81.4                 | unclass. <i>Bacteria</i>            | unclass. <i>Bacteria</i>            | unclass. <i>Bacteria</i>            | unclass. <i>Bacteria</i>      | unclass. <i>Bacteria</i> | <i>Bacteria</i> |
| Otu1985 | 0                                         | 0.2                            | 0.05              | 0.49                  | 0.08                | 81.48                | unclass. <i>Bacteria</i>            | unclass. <i>Bacteria</i>            | unclass. <i>Bacteria</i>            | unclass. <i>Bacteria</i>      | unclass. <i>Bacteria</i> | <i>Bacteria</i> |
| Otu1986 | 0                                         | 0.2                            | 0.05              | 0.49                  | 0.08                | 81.55                | unclass. <i>Bacteria</i>            | unclass. <i>Bacteria</i>            | unclass. <i>Bacteria</i>            | unclass. <i>Bacteria</i>      | unclass. <i>Bacteria</i> | <i>Bacteria</i> |
| Otu1987 | 0                                         | 0.2                            | 0.05              | 0.49                  | 0.08                | 81.63                | unclass. <i>Gammaproteobacteria</i> | unclass. <i>Gammaproteobacteria</i> | unclass. <i>Gammaproteobacteria</i> | <i>Gammaproteobacteria</i>    | <i>Proteobacteria</i>    | <i>Bacteria</i> |
| Otu1988 | 0                                         | 0.2                            | 0.05              | 0.49                  | 0.08                | 81.71                | <i>Salinisphaera</i>                | <i>Salinisphaeraceae</i>            | <i>Salinisphaerales</i>             | <i>Gammaproteobacteria</i>    | <i>Proteobacteria</i>    | <i>Bacteria</i> |
| Otu1989 | 0                                         | 0.2                            | 0.05              | 0.49                  | 0.08                | 81.78                | <i>Desulfocapsa</i>                 | <i>Desulfobulbaceae</i>             | <i>Desulfobacterales</i>            | <i>Deltaproteobacteria</i>    | <i>Proteobacteria</i>    | <i>Bacteria</i> |
| Otu1991 | 0                                         | 0.2                            | 0.05              | 0.49                  | 0.08                | 81.86                | unclass. <i>Saprospiraceae</i>      | <i>Saprospiraceae</i>               | <i>Sphingobacteriales</i>           | <i>Sphingobacteria</i>        | <i>Bacteroidetes</i>     | <i>Bacteria</i> |
| Otu1993 | 0                                         | 0.2                            | 0.05              | 0.49                  | 0.08                | 81.94                | unclass. <i>Bacteria</i>            | unclass. <i>Bacteria</i>            | unclass. <i>Bacteria</i>            | unclass. <i>Bacteria</i>      | unclass. <i>Bacteria</i> | <i>Bacteria</i> |
| Otu1994 | 0                                         | 0.2                            | 0.05              | 0.49                  | 0.08                | 82.01                | unclass. <i>Rhodobacteraceae</i>    | <i>Rhodobacteraceae</i>             | <i>Rhodobacterales</i>              | <i>Alphaproteobacteria</i>    | <i>Proteobacteria</i>    | <i>Bacteria</i> |
| Otu1995 | 0                                         | 0.2                            | 0.05              | 0.49                  | 0.08                | 82.09                | unclass. <i>Rhodobacteraceae</i>    | <i>Rhodobacteraceae</i>             | <i>Rhodobacterales</i>              | <i>Alphaproteobacteria</i>    | <i>Proteobacteria</i>    | <i>Bacteria</i> |
| Otu1998 | 0                                         | 0.2                            | 0.05              | 0.49                  | 0.08                | 82.17                | <i>Polaribacter</i>                 | <i>Flavobacteriaceae</i>            | <i>Flavobacteriales</i>             | <i>Flavobacteria</i>          | <i>Bacteroidetes</i>     | <i>Bacteria</i> |
| Otu1999 | 0                                         | 0.2                            | 0.05              | 0.49                  | 0.08                | 82.24                | unclass. <i>Burkholderiales</i>     | unclass. <i>Burkholderiales</i>     | <i>Burkholderiales</i>              | <i>Betaproteobacteria</i>     | <i>Proteobacteria</i>    | <i>Bacteria</i> |
| Otu2000 | 0                                         | 0.2                            | 0.05              | 0.49                  | 0.08                | 82.32                | unclass. <i>Desulfuromonadales</i>  | unclass. <i>Desulfuromonadales</i>  | <i>Desulfuromonadales</i>           | <i>Deltaproteobacteria</i>    | <i>Proteobacteria</i>    | <i>Bacteria</i> |
| Otu2001 | 0                                         | 0.2                            | 0.05              | 0.49                  | 0.08                | 82.4                 | unclass. <i>Flavobacteriaceae</i>   | <i>Flavobacteriaceae</i>            | <i>Flavobacteriales</i>             | <i>Flavobacteria</i>          | <i>Bacteroidetes</i>     | <i>Bacteria</i> |
| Otu2002 | 0                                         | 0.2                            | 0.05              | 0.49                  | 0.08                | 82.47                | <i>Colwellia</i>                    | <i>Colwelliaceae</i>                | <i>Alteromonadales</i>              | <i>Gammaproteobacteria</i>    | <i>Proteobacteria</i>    | <i>Bacteria</i> |
| Otu2003 | 0                                         | 0.2                            | 0.05              | 0.49                  | 0.08                | 82.55                | <i>Jannaschia</i>                   | <i>Rhodobacteraceae</i>             | <i>Rhodobacterales</i>              | <i>Alphaproteobacteria</i>    | <i>Proteobacteria</i>    | <i>Bacteria</i> |
| Otu2004 | 0                                         | 0.2                            | 0.05              | 0.49                  | 0.08                | 82.63                | unclass. <i>Bacteria</i>            | unclass. <i>Bacteria</i>            | unclass. <i>Bacteria</i>            | unclass. <i>Bacteria</i>      | unclass. <i>Bacteria</i> | <i>Bacteria</i> |
| Otu2005 | 0                                         | 0.2                            | 0.05              | 0.49                  | 0.08                | 82.7                 | unclass. <i>OD1</i>                 | unclass. <i>OD1</i>                 | unclass. <i>OD1</i>                 | unclass. <i>OD1</i>           | <i>OD1</i>               | <i>Bacteria</i> |
| Otu2006 | 0                                         | 0.2                            | 0.05              | 0.49                  | 0.08                | 82.78                | unclass. <i>Actinomycetales</i>     | unclass. <i>Actinomycetales</i>     | <i>Actinomycetales</i>              | <i>Actinobacteria</i>         | <i>Actinobacteria</i>    | <i>Bacteria</i> |
| Otu2007 | 0                                         | 0.2                            | 0.05              | 0.49                  | 0.08                | 82.86                | unclass. <i>Gammaproteobacteria</i> | unclass. <i>Gammaproteobacteria</i> | unclass. <i>Gammaproteobacteria</i> | <i>Gammaproteobacteria</i>    | <i>Proteobacteria</i>    | <i>Bacteria</i> |
| Otu2008 | 0                                         | 0.2                            | 0.05              | 0.49                  | 0.08                | 82.93                | unclass. <i>Flammeovirgaceae</i>    | <i>Flammeovirgaceae</i>             | <i>Sphingobacteriales</i>           | <i>Sphingobacteria</i>        | <i>Bacteroidetes</i>     | <i>Bacteria</i> |
| Otu2009 | 0                                         | 0.2                            | 0.05              | 0.49                  | 0.08                | 83.01                | <i>Polaribacter</i>                 | <i>Flavobacteriaceae</i>            | <i>Flavobacteriales</i>             | <i>Flavobacteria</i>          | <i>Bacteroidetes</i>     | <i>Bacteria</i> |
| Otu2010 | 0                                         | 0.2                            | 0.05              | 0.49                  | 0.08                | 83.09                | unclass. <i>Bacteroidetes</i>       | unclass. <i>Bacteroidetes</i>       | unclass. <i>Bacteroidetes</i>       | unclass. <i>Bacteroidetes</i> | <i>Bacteroidetes</i>     | <i>Bacteria</i> |

| OTU     | Av.A <sub>i</sub><br>(pH <i>in situ</i> ) | Av.A <sub>i</sub><br>(pH 7.67) | Av.δ <sub>i</sub> | Av.δ <sub>i</sub> /SD | Av.δ <sub>i</sub> % | ΣAv.δ <sub>i</sub> % | Genus                                 | Family                                | Order                                 | Class                          | Phylum                   | Domain          |
|---------|-------------------------------------------|--------------------------------|-------------------|-----------------------|---------------------|----------------------|---------------------------------------|---------------------------------------|---------------------------------------|--------------------------------|--------------------------|-----------------|
| Otu0142 | 0.2                                       | 0                              | 0.05              | 0.49                  | 0.08                | 83.16                | unclass. <i>Gammaproteobacteria</i>   | unclass. <i>Gammaproteobacteria</i>   | unclass. <i>Gammaproteobacteria</i>   | <i>Gammaproteobacteria</i>     | <i>Proteobacteria</i>    | <i>Bacteria</i> |
| Otu0144 | 0.2                                       | 0                              | 0.05              | 0.49                  | 0.08                | 83.24                | <i>Lewinella</i>                      | <i>Saprospiraceae</i>                 | <i>Sphingobacteriales</i>             | <i>Sphingobacteria</i>         | <i>Bacteroidetes</i>     | <i>Bacteria</i> |
| Otu0211 | 0.2                                       | 0                              | 0.05              | 0.49                  | 0.08                | 83.31                | unclass. <i>Alphaproteobacteria</i>   | unclass. <i>Alphaproteobacteria</i>   | unclass. <i>Alphaproteobacteria</i>   | <i>Alphaproteobacteria</i>     | <i>Proteobacteria</i>    | <i>Bacteria</i> |
| Otu0308 | 0.2                                       | 0                              | 0.05              | 0.49                  | 0.08                | 83.39                | unclass. <i>Gammaproteobacteria</i>   | unclass. <i>Gammaproteobacteria</i>   | unclass. <i>Gammaproteobacteria</i>   | <i>Gammaproteobacteria</i>     | <i>Proteobacteria</i>    | <i>Bacteria</i> |
| Otu0321 | 0.2                                       | 0                              | 0.05              | 0.49                  | 0.08                | 83.47                | unclass. <i>Alphaproteobacteria</i>   | unclass. <i>Alphaproteobacteria</i>   | unclass. <i>Alphaproteobacteria</i>   | <i>Alphaproteobacteria</i>     | <i>Proteobacteria</i>    | <i>Bacteria</i> |
| Otu0361 | 0.2                                       | 0                              | 0.05              | 0.49                  | 0.08                | 83.54                | unclass. <i>Flavobacteriaceae</i>     | <i>Flavobacteriaceae</i>              | <i>Flavobacteriales</i>               | <i>Flavobacteria</i>           | <i>Bacteroidetes</i>     | <i>Bacteria</i> |
| Otu0389 | 0.2                                       | 0                              | 0.05              | 0.49                  | 0.08                | 83.62                | unclass. <i>Flavobacteriaceae</i>     | <i>Flavobacteriaceae</i>              | <i>Flavobacteriales</i>               | <i>Flavobacteria</i>           | <i>Bacteroidetes</i>     | <i>Bacteria</i> |
| Otu0461 | 0.2                                       | 0                              | 0.05              | 0.49                  | 0.08                | 83.7                 | unclass. <i>Microbacteriaceae</i>     | <i>Microbacteriaceae</i>              | <i>Actinomycetales</i>                | <i>Actinobacteria</i>          | <i>Actinobacteria</i>    | <i>Bacteria</i> |
| Otu0717 | 0.2                                       | 0                              | 0.05              | 0.49                  | 0.08                | 83.77                | unclass. <i>Rhodobacteraceae</i>      | <i>Rhodobacteraceae</i>               | <i>Rhodobacterales</i>                | <i>Alphaproteobacteria</i>     | <i>Proteobacteria</i>    | <i>Bacteria</i> |
| Otu0873 | 0.2                                       | 0                              | 0.05              | 0.49                  | 0.08                | 83.85                | unclass. <i>Gammaproteobacteria</i>   | unclass. <i>Gammaproteobacteria</i>   | unclass. <i>Gammaproteobacteria</i>   | <i>Gammaproteobacteria</i>     | <i>Proteobacteria</i>    | <i>Bacteria</i> |
| Otu1004 | 0.2                                       | 0                              | 0.05              | 0.49                  | 0.08                | 83.92                | unclass. <i>Gammaproteobacteria</i>   | unclass. <i>Gammaproteobacteria</i>   | unclass. <i>Gammaproteobacteria</i>   | <i>Gammaproteobacteria</i>     | <i>Proteobacteria</i>    | <i>Bacteria</i> |
| Otu1229 | 0.2                                       | 0                              | 0.05              | 0.49                  | 0.08                | 84                   | <i>Haliea</i>                         | <i>Alteromonadaceae</i>               | <i>Alteromonadales</i>                | <i>Gammaproteobacteria</i>     | <i>Proteobacteria</i>    | <i>Bacteria</i> |
| Otu1362 | 0.2                                       | 0                              | 0.05              | 0.49                  | 0.08                | 84.08                | unclass. <i>Bacteria</i>              | unclass. <i>Bacteria</i>              | unclass. <i>Bacteria</i>              | unclass. <i>Bacteria</i>       | unclass. <i>Bacteria</i> | <i>Bacteria</i> |
| Otu1683 | 0.2                                       | 0                              | 0.05              | 0.49                  | 0.08                | 84.15                | unclass. <i>Gammaproteobacteria</i>   | unclass. <i>Gammaproteobacteria</i>   | unclass. <i>Gammaproteobacteria</i>   | <i>Gammaproteobacteria</i>     | <i>Proteobacteria</i>    | <i>Bacteria</i> |
| Otu1687 | 0.2                                       | 0                              | 0.05              | 0.49                  | 0.08                | 84.23                | <i>Haliea</i>                         | <i>Alteromonadaceae</i>               | <i>Alteromonadales</i>                | <i>Gammaproteobacteria</i>     | <i>Proteobacteria</i>    | <i>Bacteria</i> |
| Otu1699 | 0.2                                       | 0                              | 0.05              | 0.49                  | 0.08                | 84.3                 | <i>Flavobacterium</i>                 | <i>Flavobacteriaceae</i>              | <i>Flavobacteriales</i>               | <i>Flavobacteria</i>           | <i>Bacteroidetes</i>     | <i>Bacteria</i> |
| Otu1703 | 0.2                                       | 0                              | 0.05              | 0.49                  | 0.08                | 84.38                | unclass. <i>Proteobacteria</i>        | unclass. <i>Proteobacteria</i>        | unclass. <i>Proteobacteria</i>        | unclass. <i>Proteobacteria</i> | <i>Proteobacteria</i>    | <i>Bacteria</i> |
| Otu1735 | 0.2                                       | 0                              | 0.05              | 0.49                  | 0.08                | 84.46                | <i>Sulfurovum</i>                     | <i>Helicobacteraceae</i>              | <i>Campylobacterales</i>              | <i>Epsilonproteobacteria</i>   | <i>Proteobacteria</i>    | <i>Bacteria</i> |
| Otu1748 | 0.2                                       | 0                              | 0.05              | 0.49                  | 0.08                | 84.53                | unclass. <i>Epsilonproteobacteria</i> | unclass. <i>Epsilonproteobacteria</i> | unclass. <i>Epsilonproteobacteria</i> | <i>Epsilonproteobacteria</i>   | <i>Proteobacteria</i>    | <i>Bacteria</i> |
| Otu1817 | 0.2                                       | 0                              | 0.05              | 0.49                  | 0.08                | 84.61                | unclass. <i>Flavobacteriaceae</i>     | <i>Flavobacteriaceae</i>              | <i>Flavobacteriales</i>               | <i>Flavobacteria</i>           | <i>Bacteroidetes</i>     | <i>Bacteria</i> |
| Otu1826 | 0.2                                       | 0                              | 0.05              | 0.49                  | 0.08                | 84.68                | unclass. <i>Sphingobacteriales</i>    | unclass. <i>Sphingobacteriales</i>    | <i>Sphingobacteriales</i>             | <i>Sphingobacteria</i>         | <i>Bacteroidetes</i>     | <i>Bacteria</i> |
| Otu1829 | 0.2                                       | 0                              | 0.05              | 0.49                  | 0.08                | 84.76                | unclass. <i>Bacteria</i>              | unclass. <i>Bacteria</i>              | unclass. <i>Bacteria</i>              | unclass. <i>Bacteria</i>       | unclass. <i>Bacteria</i> | <i>Bacteria</i> |
| Otu1830 | 0.2                                       | 0                              | 0.05              | 0.49                  | 0.08                | 84.84                | unclass. <i>Flavobacteriaceae</i>     | <i>Flavobacteriaceae</i>              | <i>Flavobacteriales</i>               | <i>Flavobacteria</i>           | <i>Bacteroidetes</i>     | <i>Bacteria</i> |
| Otu1831 | 0.2                                       | 0                              | 0.05              | 0.49                  | 0.08                | 84.91                | unclass. <i>Proteobacteria</i>        | unclass. <i>Proteobacteria</i>        | unclass. <i>Proteobacteria</i>        | unclass. <i>Proteobacteria</i> | <i>Proteobacteria</i>    | <i>Bacteria</i> |
| Otu1832 | 0.2                                       | 0                              | 0.05              | 0.49                  | 0.08                | 84.99                | <i>Neptunomonas</i>                   | <i>Oceanospirillaceae</i>             | <i>Oceanospirillales</i>              | <i>Gammaproteobacteria</i>     | <i>Proteobacteria</i>    | <i>Bacteria</i> |
| Otu1835 | 0.2                                       | 0                              | 0.05              | 0.49                  | 0.08                | 85.07                | unclass. <i>Gammaproteobacteria</i>   | unclass. <i>Gammaproteobacteria</i>   | unclass. <i>Gammaproteobacteria</i>   | <i>Gammaproteobacteria</i>     | <i>Proteobacteria</i>    | <i>Bacteria</i> |
| Otu1838 | 0.2                                       | 0                              | 0.05              | 0.49                  | 0.08                | 85.14                | unclass. <i>Bacteria</i>              | unclass. <i>Bacteria</i>              | unclass. <i>Bacteria</i>              | unclass. <i>Bacteria</i>       | unclass. <i>Bacteria</i> | <i>Bacteria</i> |

| OTU     | Av.A <sub>i</sub><br>(pH <i>in situ</i> ) | Av.A <sub>i</sub><br>(pH 7.67) | Av.δ <sub>i</sub> | Av.δ <sub>i</sub> /SD | Av.δ <sub>i</sub> % | ΣAv.δ <sub>i</sub> % | Genus                               | Family                              | Order                               | Class                         | Phylum                   | Domain          |
|---------|-------------------------------------------|--------------------------------|-------------------|-----------------------|---------------------|----------------------|-------------------------------------|-------------------------------------|-------------------------------------|-------------------------------|--------------------------|-----------------|
| Otu1839 | 0.2                                       | 0                              | 0.05              | 0.49                  | 0.08                | 85.22                | unclass. <i>Flavobacteriaceae</i>   | <i>Flavobacteriaceae</i>            | <i>Flavobacteriales</i>             | <i>Flavobacteria</i>          | <i>Bacteroidetes</i>     | <i>Bacteria</i> |
| Otu1840 | 0.2                                       | 0                              | 0.05              | 0.49                  | 0.08                | 85.29                | unclass. <i>Desulfobulbaceae</i>    | <i>Desulfobulbaceae</i>             | <i>Desulfobacterales</i>            | <i>Deltaproteobacteria</i>    | <i>Proteobacteria</i>    | <i>Bacteria</i> |
| Otu1843 | 0.2                                       | 0                              | 0.05              | 0.49                  | 0.08                | 85.37                | unclass. <i>Bacteria</i>            | unclass. <i>Bacteria</i>            | unclass. <i>Bacteria</i>            | unclass. <i>Bacteria</i>      | unclass. <i>Bacteria</i> | <i>Bacteria</i> |
| Otu1844 | 0.2                                       | 0                              | 0.05              | 0.49                  | 0.08                | 85.45                | unclass. <i>Bacteroidetes</i>       | unclass. <i>Bacteroidetes</i>       | unclass. <i>Bacteroidetes</i>       | unclass. <i>Bacteroidetes</i> | <i>Bacteroidetes</i>     | <i>Bacteria</i> |
| Otu1845 | 0.2                                       | 0                              | 0.05              | 0.49                  | 0.08                | 85.52                | unclass. <i>Sphingobacteriales</i>  | unclass. <i>Sphingobacteriales</i>  | <i>Sphingobacteriales</i>           | <i>Sphingobacteria</i>        | <i>Bacteroidetes</i>     | <i>Bacteria</i> |
| Otu1846 | 0.2                                       | 0                              | 0.05              | 0.49                  | 0.08                | 85.6                 | unclass. <i>Flavobacteriaceae</i>   | <i>Flavobacteriaceae</i>            | <i>Flavobacteriales</i>             | <i>Flavobacteria</i>          | <i>Bacteroidetes</i>     | <i>Bacteria</i> |
| Otu1847 | 0.2                                       | 0                              | 0.05              | 0.49                  | 0.08                | 85.67                | unclass. <i>Gammaproteobacteria</i> | unclass. <i>Gammaproteobacteria</i> | unclass. <i>Gammaproteobacteria</i> | <i>Gammaproteobacteria</i>    | <i>Proteobacteria</i>    | <i>Bacteria</i> |
| Otu1849 | 0.2                                       | 0                              | 0.05              | 0.49                  | 0.08                | 85.75                | unclass. <i>Alphaproteobacteria</i> | unclass. <i>Alphaproteobacteria</i> | unclass. <i>Alphaproteobacteria</i> | <i>Alphaproteobacteria</i>    | <i>Proteobacteria</i>    | <i>Bacteria</i> |
| Otu1850 | 0.2                                       | 0                              | 0.05              | 0.49                  | 0.08                | 85.83                | <i>Reichenbachiella</i>             | <i>Flammeovirgaceae</i>             | <i>Sphingobacteriales</i>           | <i>Sphingobacteria</i>        | <i>Bacteroidetes</i>     | <i>Bacteria</i> |
| Otu1852 | 0.2                                       | 0                              | 0.05              | 0.49                  | 0.08                | 85.9                 | unclass. <i>Acidobacteria_Gp22</i>  | unclass. <i>Acidobacteria_Gp22</i>  | unclass. <i>Acidobacteria_Gp22</i>  | <i>Acidobacteria_Gp22</i>     | <i>Acidobacteria</i>     | <i>Bacteria</i> |
| Otu1853 | 0.2                                       | 0                              | 0.05              | 0.49                  | 0.08                | 85.98                | unclass. <i>Bacteria</i>            | unclass. <i>Bacteria</i>            | unclass. <i>Bacteria</i>            | unclass. <i>Bacteria</i>      | unclass. <i>Bacteria</i> | <i>Bacteria</i> |
| Otu0006 | 0.2                                       | 0                              | 0.05              | 0.49                  | 0.08                | 86.05                | <i>Polaribacter</i>                 | <i>Flavobacteriaceae</i>            | <i>Flavobacteriales</i>             | <i>Flavobacteria</i>          | <i>Bacteroidetes</i>     | <i>Bacteria</i> |
| Otu0014 | 0.2                                       | 0                              | 0.05              | 0.49                  | 0.08                | 86.13                | <i>Reinekea</i>                     | <i>Oceanospirillaceae</i>           | <i>Oceanospirillales</i>            | <i>Gammaproteobacteria</i>    | <i>Proteobacteria</i>    | <i>Bacteria</i> |
| Otu0064 | 0.2                                       | 0                              | 0.05              | 0.49                  | 0.08                | 86.21                | unclass. <i>Flavobacteriaceae</i>   | <i>Flavobacteriaceae</i>            | <i>Flavobacteriales</i>             | <i>Flavobacteria</i>          | <i>Bacteroidetes</i>     | <i>Bacteria</i> |
| Otu0081 | 0.2                                       | 0                              | 0.05              | 0.49                  | 0.08                | 86.28                | <i>Altererythrobacter</i>           | <i>Erythrobacteraceae</i>           | <i>Sphingomonadales</i>             | <i>Alphaproteobacteria</i>    | <i>Proteobacteria</i>    | <i>Bacteria</i> |
| Otu0374 | 0.2                                       | 0                              | 0.05              | 0.49                  | 0.08                | 86.36                | unclass. <i>Flavobacteriaceae</i>   | <i>Flavobacteriaceae</i>            | <i>Flavobacteriales</i>             | <i>Flavobacteria</i>          | <i>Bacteroidetes</i>     | <i>Bacteria</i> |
| Otu0420 | 0.2                                       | 0                              | 0.05              | 0.49                  | 0.08                | 86.43                | unclass. <i>Gammaproteobacteria</i> | unclass. <i>Gammaproteobacteria</i> | unclass. <i>Gammaproteobacteria</i> | <i>Gammaproteobacteria</i>    | <i>Proteobacteria</i>    | <i>Bacteria</i> |
| Otu0488 | 0.2                                       | 0                              | 0.05              | 0.49                  | 0.08                | 86.51                | unclass. <i>Gammaproteobacteria</i> | unclass. <i>Gammaproteobacteria</i> | unclass. <i>Gammaproteobacteria</i> | <i>Gammaproteobacteria</i>    | <i>Proteobacteria</i>    | <i>Bacteria</i> |
| Otu0515 | 0.2                                       | 0                              | 0.05              | 0.49                  | 0.08                | 86.59                | unclass. <i>Gammaproteobacteria</i> | unclass. <i>Gammaproteobacteria</i> | unclass. <i>Gammaproteobacteria</i> | <i>Gammaproteobacteria</i>    | <i>Proteobacteria</i>    | <i>Bacteria</i> |
| Otu0535 | 0.2                                       | 0                              | 0.05              | 0.49                  | 0.08                | 86.66                | <i>Loktanela</i>                    | <i>Rhodobacteraceae</i>             | <i>Rhodobacterales</i>              | <i>Alphaproteobacteria</i>    | <i>Proteobacteria</i>    | <i>Bacteria</i> |
| Otu0710 | 0.2                                       | 0                              | 0.05              | 0.49                  | 0.08                | 86.74                | unclass. <i>Gammaproteobacteria</i> | unclass. <i>Gammaproteobacteria</i> | unclass. <i>Gammaproteobacteria</i> | <i>Gammaproteobacteria</i>    | <i>Proteobacteria</i>    | <i>Bacteria</i> |
| Otu0791 | 0.2                                       | 0                              | 0.05              | 0.49                  | 0.08                | 86.81                | <i>Thalassomonas</i>                | <i>Colwelliaceae</i>                | <i>Alteromonadales</i>              | <i>Gammaproteobacteria</i>    | <i>Proteobacteria</i>    | <i>Bacteria</i> |
| Otu0870 | 0.2                                       | 0                              | 0.05              | 0.49                  | 0.08                | 86.89                | unclass. <i>Gammaproteobacteria</i> | unclass. <i>Gammaproteobacteria</i> | unclass. <i>Gammaproteobacteria</i> | <i>Gammaproteobacteria</i>    | <i>Proteobacteria</i>    | <i>Bacteria</i> |
| Otu0892 | 0.2                                       | 0                              | 0.05              | 0.49                  | 0.08                | 86.97                | unclass. <i>Bacteroidetes</i>       | unclass. <i>Bacteroidetes</i>       | unclass. <i>Bacteroidetes</i>       | unclass. <i>Bacteroidetes</i> | <i>Bacteroidetes</i>     | <i>Bacteria</i> |
| Otu0946 | 0.2                                       | 0                              | 0.05              | 0.49                  | 0.08                | 87.04                | <i>Pelagibacter</i>                 | SAR11-clade                         | <i>Rickettsiales</i>                | <i>Alphaproteobacteria</i>    | <i>Proteobacteria</i>    | <i>Bacteria</i> |
| Otu0949 | 0.2                                       | 0                              | 0.05              | 0.49                  | 0.08                | 87.12                | unclass. <i>Gammaproteobacteria</i> | unclass. <i>Gammaproteobacteria</i> | unclass. <i>Gammaproteobacteria</i> | <i>Gammaproteobacteria</i>    | <i>Proteobacteria</i>    | <i>Bacteria</i> |
| Otu1126 | 0.2                                       | 0                              | 0.05              | 0.49                  | 0.08                | 87.19                | unclass. <i>Bacteroidetes</i>       | unclass. <i>Bacteroidetes</i>       | unclass. <i>Bacteroidetes</i>       | unclass. <i>Bacteroidetes</i> | <i>Bacteroidetes</i>     | <i>Bacteria</i> |

| OTU     | Av.A <sub>i</sub><br>(pH <i>in situ</i> ) | Av.A <sub>i</sub><br>(pH 7.67) | Av.δ <sub>i</sub> | Av.δ <sub>i</sub> /SD | Av.δ <sub>i</sub> % | ΣAv.δ <sub>i</sub> % | Genus                               | Family                              | Order                               | Class                         | Phylum                   | Domain                 |
|---------|-------------------------------------------|--------------------------------|-------------------|-----------------------|---------------------|----------------------|-------------------------------------|-------------------------------------|-------------------------------------|-------------------------------|--------------------------|------------------------|
| Otu1145 | 0.2                                       | 0                              | 0.05              | 0.49                  | 0.08                | 87.27                | unclass. <i>Bacteria</i>            | unclass. <i>Bacteria</i>            | unclass. <i>Bacteria</i>            | unclass. <i>Bacteria</i>      | unclass. <i>Bacteria</i> | <i>Bacteria</i>        |
| Otu1415 | 0.2                                       | 0                              | 0.05              | 0.49                  | 0.08                | 87.35                | <i>Polaribacter</i>                 | <i>Flavobacteriaceae</i>            | <i>Flavobacteriales</i>             | <i>Flavobacteria</i>          | <i>Bacteroidetes</i>     | <i>Bacteria</i>        |
| Otu1542 | 0.2                                       | 0                              | 0.05              | 0.49                  | 0.08                | 87.42                | unclass. <i>Burkholderiales</i>     | unclass. <i>Burkholderiales</i>     | <i>Burkholderiales</i>              | <i>Betaproteobacteria</i>     | <i>Proteobacteria</i>    | <i>Bacteria</i>        |
| Otu1645 | 0.2                                       | 0                              | 0.05              | 0.49                  | 0.08                | 87.5                 | <i>Thalassomonas</i>                | <i>Colwelliaceae</i>                | <i>Alteromonadales</i>              | <i>Gammaproteobacteria</i>    | <i>Proteobacteria</i>    | <i>Bacteria</i>        |
| Otu1713 | 0.2                                       | 0                              | 0.05              | 0.49                  | 0.08                | 87.57                | unclass. <i>Flavobacteriaceae</i>   | <i>Flavobacteriaceae</i>            | <i>Flavobacteriales</i>             | <i>Flavobacteria</i>          | <i>Bacteroidetes</i>     | <i>Bacteria</i>        |
| Otu1767 | 0.2                                       | 0                              | 0.05              | 0.49                  | 0.08                | 87.65                | unclass. <i>Bacteria</i>            | unclass. <i>Bacteria</i>            | unclass. <i>Bacteria</i>            | unclass. <i>Bacteria</i>      | unclass. <i>Bacteria</i> | <i>Bacteria</i>        |
| Otu1795 | 0.2                                       | 0                              | 0.05              | 0.49                  | 0.08                | 87.73                | <i>Colwellia</i>                    | <i>Colwelliaceae</i>                | <i>Alteromonadales</i>              | <i>Gammaproteobacteria</i>    | <i>Proteobacteria</i>    | <i>Bacteria</i>        |
| Otu1813 | 0.2                                       | 0                              | 0.05              | 0.49                  | 0.08                | 87.8                 | <i>Colwellia</i>                    | <i>Colwelliaceae</i>                | <i>Alteromonadales</i>              | <i>Gammaproteobacteria</i>    | <i>Proteobacteria</i>    | <i>Bacteria</i>        |
| Otu1834 | 0.2                                       | 0                              | 0.05              | 0.49                  | 0.08                | 87.88                | <i>Eudoraea</i>                     | <i>Flavobacteriaceae</i>            | <i>Flavobacteriales</i>             | <i>Flavobacteria</i>          | <i>Bacteroidetes</i>     | <i>Bacteria</i>        |
| Otu1855 | 0.2                                       | 0                              | 0.05              | 0.49                  | 0.08                | 87.95                | unclass. <i>Gammaproteobacteria</i> | unclass. <i>Gammaproteobacteria</i> | unclass. <i>Gammaproteobacteria</i> | <i>Gammaproteobacteria</i>    | <i>Proteobacteria</i>    | <i>Bacteria</i>        |
| Otu1856 | 0.2                                       | 0                              | 0.05              | 0.49                  | 0.08                | 88.03                | unclass. <i>Bacteria</i>            | unclass. <i>Bacteria</i>            | unclass. <i>Bacteria</i>            | unclass. <i>Bacteria</i>      | unclass. <i>Bacteria</i> | <i>Bacteria</i>        |
| Otu1857 | 0.2                                       | 0                              | 0.05              | 0.49                  | 0.08                | 88.1                 | <i>Gaetbulibacter</i>               | <i>Flavobacteriaceae</i>            | <i>Flavobacteriales</i>             | <i>Flavobacteria</i>          | <i>Bacteroidetes</i>     | <i>Bacteria</i>        |
| Otu1858 | 0.2                                       | 0                              | 0.05              | 0.49                  | 0.08                | 88.18                | <i>Glaciecola</i>                   | <i>Alteromonadaceae</i>             | <i>Alteromonadales</i>              | <i>Gammaproteobacteria</i>    | <i>Proteobacteria</i>    | <i>Bacteria</i>        |
| Otu1859 | 0.2                                       | 0                              | 0.05              | 0.49                  | 0.08                | 88.26                | <i>Ferrimonas</i>                   | <i>Ferrimonadaceae</i>              | <i>Alteromonadales</i>              | <i>Gammaproteobacteria</i>    | <i>Proteobacteria</i>    | <i>Bacteria</i>        |
| Otu1860 | 0.2                                       | 0                              | 0.05              | 0.49                  | 0.08                | 88.33                | unclass. <i>Alteromonadaceae</i>    | <i>Alteromonadaceae</i>             | <i>Alteromonadales</i>              | <i>Gammaproteobacteria</i>    | <i>Proteobacteria</i>    | <i>Bacteria</i>        |
| Otu1862 | 0.2                                       | 0                              | 0.05              | 0.49                  | 0.08                | 88.41                | unclass. <i>Bacteroidetes</i>       | unclass. <i>Bacteroidetes</i>       | unclass. <i>Bacteroidetes</i>       | unclass. <i>Bacteroidetes</i> | <i>Bacteroidetes</i>     | <i>Bacteria</i>        |
| Otu1863 | 0.2                                       | 0                              | 0.05              | 0.49                  | 0.08                | 88.48                | unclass. <i>Desulfuromonadaceae</i> | <i>Desulfuromonadaceae</i>          | <i>Desulfuromonadales</i>           | <i>Deltaproteobacteria</i>    | <i>Proteobacteria</i>    | <i>Bacteria</i>        |
| Otu1864 | 0.2                                       | 0                              | 0.05              | 0.49                  | 0.08                | 88.56                | <i>Lewinella</i>                    | <i>Saprospiraceae</i>               | <i>Sphingobacteriales</i>           | <i>Sphingobacteria</i>        | <i>Bacteroidetes</i>     | <i>Bacteria</i>        |
| Otu1866 | 0.2                                       | 0                              | 0.05              | 0.49                  | 0.08                | 88.64                | <i>Algibacter</i>                   | <i>Flavobacteriaceae</i>            | <i>Flavobacteriales</i>             | <i>Flavobacteria</i>          | <i>Bacteroidetes</i>     | <i>Bacteria</i>        |
| Otu1867 | 0.2                                       | 0                              | 0.05              | 0.49                  | 0.08                | 88.71                | unclass. <i>Bacteria</i>            | unclass. <i>Bacteria</i>            | unclass. <i>Bacteria</i>            | unclass. <i>Bacteria</i>      | unclass. <i>Bacteria</i> | <i>Bacteria</i>        |
| Otu1868 | 0.2                                       | 0                              | 0.05              | 0.49                  | 0.08                | 88.79                | <i>Maribacter</i>                   | <i>Flavobacteriaceae</i>            | <i>Flavobacteriales</i>             | <i>Flavobacteria</i>          | <i>Bacteroidetes</i>     | <i>Bacteria</i>        |
| Otu1870 | 0.2                                       | 0                              | 0.05              | 0.49                  | 0.08                | 88.86                | unclass. <i>Gammaproteobacteria</i> | unclass. <i>Gammaproteobacteria</i> | unclass. <i>Gammaproteobacteria</i> | <i>Gammaproteobacteria</i>    | <i>Proteobacteria</i>    | <i>Bacteria</i>        |
| Otu1871 | 0.2                                       | 0                              | 0.05              | 0.49                  | 0.08                | 88.94                | unclass. <i>Flavobacteriaceae</i>   | <i>Flavobacteriaceae</i>            | <i>Flavobacteriales</i>             | <i>Flavobacteria</i>          | <i>Bacteroidetes</i>     | <i>Bacteria</i>        |
| Otu1872 | 0.2                                       | 0                              | 0.05              | 0.49                  | 0.08                | 89.02                | unclass. <i>Domain</i>              | unclass. <i>Domain</i>              | unclass. <i>Domain</i>              | unclass. <i>Domain</i>        | unclass. <i>Domain</i>   | unclass. <i>Domain</i> |
| Otu1874 | 0.2                                       | 0                              | 0.05              | 0.49                  | 0.08                | 89.09                | unclass. <i>Gammaproteobacteria</i> | unclass. <i>Gammaproteobacteria</i> | unclass. <i>Gammaproteobacteria</i> | <i>Gammaproteobacteria</i>    | <i>Proteobacteria</i>    | <i>Bacteria</i>        |
| Otu1876 | 0.2                                       | 0                              | 0.05              | 0.49                  | 0.08                | 89.17                | <i>Glaciecola</i>                   | <i>Alteromonadaceae</i>             | <i>Alteromonadales</i>              | <i>Gammaproteobacteria</i>    | <i>Proteobacteria</i>    | <i>Bacteria</i>        |
| Otu1877 | 0.2                                       | 0                              | 0.05              | 0.49                  | 0.08                | 89.24                | unclass. <i>Bacteria</i>            | unclass. <i>Bacteria</i>            | unclass. <i>Bacteria</i>            | unclass. <i>Bacteria</i>      | unclass. <i>Bacteria</i> | <i>Bacteria</i>        |



| OTU                                                     | Av.A <sub>i</sub><br>(pH <i>in situ</i> ) | Av.A <sub>i</sub><br>(pH 7.67) | Av.δ <sub>i</sub> | Av.δ <sub>i</sub> /SD | Av.δ <sub>i</sub> % | ΣAv.δ <sub>i</sub> % | Genus                                              | Family                                    | Order                                           | Class                        | Phylum                   | Domain          |
|---------------------------------------------------------|-------------------------------------------|--------------------------------|-------------------|-----------------------|---------------------|----------------------|----------------------------------------------------|-------------------------------------------|-------------------------------------------------|------------------------------|--------------------------|-----------------|
| Otu1878                                                 | 0.2                                       | 0                              | 0.05              | 0.49                  | 0.08                | 89.32                | unclass. <i>Bacteria</i>                           | unclass. <i>Bacteria</i>                  | unclass. <i>Bacteria</i>                        | unclass. <i>Bacteria</i>     | unclass. <i>Bacteria</i> | <i>Bacteria</i> |
| Otu1879                                                 | 0.2                                       | 0                              | 0.05              | 0.49                  | 0.08                | 89.4                 | unclass. <i>Flavobacteriaceae</i>                  | <i>Flavobacteriaceae</i>                  | <i>Flavobacteriales</i>                         | <i>Flavobacteria</i>         | <i>Bacteroidetes</i>     | <i>Bacteria</i> |
| Otu0007                                                 | 0.2                                       | 0                              | 0.05              | 0.49                  | 0.08                | 89.47                | unclass. <i>Flavobacteriales</i>                   | unclass. <i>Flavobacteriales</i>          | <i>Flavobacteriales</i>                         | <i>Flavobacteria</i>         | <i>Bacteroidetes</i>     | <i>Bacteria</i> |
| Otu0048                                                 | 0.2                                       | 0                              | 0.05              | 0.49                  | 0.08                | 89.55                | unclass. <i>Flavobacteriaceae</i>                  | <i>Flavobacteriaceae</i>                  | <i>Flavobacteriales</i>                         | <i>Flavobacteria</i>         | <i>Bacteroidetes</i>     | <i>Bacteria</i> |
| Otu0131                                                 | 0.2                                       | 0                              | 0.05              | 0.49                  | 0.08                | 89.62                | <i>Roseivirga</i>                                  | <i>Flammeovirgaceae</i>                   | <i>Sphingobacteriales</i>                       | <i>Sphingobacteria</i>       | <i>Bacteroidetes</i>     | <i>Bacteria</i> |
| Otu0180                                                 | 0.2                                       | 0                              | 0.05              | 0.49                  | 0.08                | 89.7                 | <i>Reichenbachiella</i>                            | <i>Flammeovirgaceae</i>                   | <i>Sphingobacteriales</i>                       | <i>Sphingobacteria</i>       | <i>Bacteroidetes</i>     | <i>Bacteria</i> |
| Otu0222                                                 | 0.2                                       | 0                              | 0.05              | 0.49                  | 0.08                | 89.78                | <i>Haliea</i>                                      | <i>Alteromonadaceae</i>                   | <i>Alteromonadales</i>                          | <i>Gammaproteobacteria</i>   | <i>Proteobacteria</i>    | <i>Bacteria</i> |
| Otu0253                                                 | 0.2                                       | 0                              | 0.05              | 0.49                  | 0.08                | 89.85                | unclass. <i>Saprospiraceae</i>                     | <i>Saprospiraceae</i>                     | <i>Sphingobacteriales</i>                       | <i>Sphingobacteria</i>       | <i>Bacteroidetes</i>     | <i>Bacteria</i> |
| Otu0265                                                 | 0.2                                       | 0                              | 0.05              | 0.49                  | 0.08                | 89.93                | unclass. <i>Bacteria</i>                           | unclass. <i>Bacteria</i>                  | unclass. <i>Bacteria</i>                        | unclass. <i>Bacteria</i>     | unclass. <i>Bacteria</i> | <i>Bacteria</i> |
| Otu0323                                                 | 0.2                                       | 0                              | 0.05              | 0.49                  | 0.08                | 90                   | unclass. <i>Gammaproteobacteria_incertae_sedis</i> | <i>Gammaproteobacteria_incertae_sedis</i> | <i>Gammaproteobacteria_order_incertae_sedis</i> | <i>Gammaproteobacteria</i>   | <i>Proteobacteria</i>    | <i>Bacteria</i> |
| Winter 'serial dilution' (average dissimilarity: 56.6%) |                                           |                                |                   |                       |                     |                      |                                                    |                                           |                                                 |                              |                          |                 |
| Otu0117                                                 | 0.88                                      | 14.6                           | 9.3               | 6.9                   | 16.44               | 16.44                | <i>Arcobacter</i>                                  | <i>Campylobacteraceae</i>                 | <i>Campylobacterales</i>                        | <i>Epsilonproteobacteria</i> | <i>Proteobacteria</i>    | <i>Bacteria</i> |
| Otu1748                                                 | 0                                         | 6.37                           | 4.31              | 5.61                  | 7.61                | 24.05                | unclass. <i>Epsilonproteobacteria</i>              | unclass. <i>Epsilonproteobacteria</i>     | unclass. <i>Epsilonproteobacteria</i>           | <i>Epsilonproteobacteria</i> | <i>Proteobacteria</i>    | <i>Bacteria</i> |
| Otu0055                                                 | 9.17                                      | 4.54                           | 3.77              | 1.75                  | 6.67                | 30.72                | <i>Colwellia</i>                                   | <i>Colwelliaceae</i>                      | <i>Alteromonadales</i>                          | <i>Gammaproteobacteria</i>   | <i>Proteobacteria</i>    | <i>Bacteria</i> |
| Otu0686                                                 | 0.4                                       | 5.23                           | 3.25              | 2.1                   | 5.75                | 36.47                | <i>Marinomonas</i>                                 | <i>Oceanospirillaceae</i>                 | <i>Oceanospirillales</i>                        | <i>Gammaproteobacteria</i>   | <i>Proteobacteria</i>    | <i>Bacteria</i> |
| Otu0132                                                 | 8.64                                      | 4.05                           | 3.11              | 2.16                  | 5.5                 | 41.97                | unclass. <i>Alteromonadales</i>                    | unclass. <i>Alteromonadales</i>           | <i>Alteromonadales</i>                          | <i>Gammaproteobacteria</i>   | <i>Proteobacteria</i>    | <i>Bacteria</i> |
| Otu0106                                                 | 12.27                                     | 7.72                           | 3.1               | 1.86                  | 5.48                | 47.45                | <i>Marinomonas</i>                                 | <i>Oceanospirillaceae</i>                 | <i>Oceanospirillales</i>                        | <i>Gammaproteobacteria</i>   | <i>Proteobacteria</i>    | <i>Bacteria</i> |
| Otu0234                                                 | 0.2                                       | 4.68                           | 3.03              | 3.7                   | 5.36                | 52.81                | <i>Arcobacter</i>                                  | <i>Campylobacteraceae</i>                 | <i>Campylobacterales</i>                        | <i>Epsilonproteobacteria</i> | <i>Proteobacteria</i>    | <i>Bacteria</i> |
| Otu0160                                                 | 5.46                                      | 1.2                            | 2.98              | 1.78                  | 5.27                | 58.09                | <i>Colwellia</i>                                   | <i>Colwelliaceae</i>                      | <i>Alteromonadales</i>                          | <i>Gammaproteobacteria</i>   | <i>Proteobacteria</i>    | <i>Bacteria</i> |
| Otu0123                                                 | 5.62                                      | 2.75                           | 2.21              | 1.05                  | 3.91                | 62                   | unclass. <i>Gammaproteobacteria</i>                | unclass. <i>Gammaproteobacteria</i>       | unclass. <i>Gammaproteobacteria</i>             | <i>Gammaproteobacteria</i>   | <i>Proteobacteria</i>    | <i>Bacteria</i> |
| Otu0471                                                 | 4.28                                      | 1.03                           | 2.19              | 2.03                  | 3.88                | 65.88                | <i>Oceaniserpentilla</i>                           | <i>Oceanospirillaceae</i>                 | <i>Oceanospirillales</i>                        | <i>Gammaproteobacteria</i>   | <i>Proteobacteria</i>    | <i>Bacteria</i> |
| Otu1778                                                 | 0.2                                       | 2.28                           | 1.44              | 0.89                  | 2.55                | 68.43                | <i>Arcobacter</i>                                  | <i>Campylobacteraceae</i>                 | <i>Campylobacterales</i>                        | <i>Epsilonproteobacteria</i> | <i>Proteobacteria</i>    | <i>Bacteria</i> |
| Otu0035                                                 | 2.68                                      | 1.23                           | 1.09              | 0.92                  | 1.92                | 70.35                | <i>Colwellia</i>                                   | <i>Colwelliaceae</i>                      | <i>Alteromonadales</i>                          | <i>Gammaproteobacteria</i>   | <i>Proteobacteria</i>    | <i>Bacteria</i> |
| Otu1780                                                 | 0.77                                      | 1.81                           | 0.98              | 1.95                  | 1.74                | 72.09                | unclass. <i>Oceanospirillales</i>                  | unclass. <i>Oceanospirillales</i>         | <i>Oceanospirillales</i>                        | <i>Gammaproteobacteria</i>   | <i>Proteobacteria</i>    | <i>Bacteria</i> |
| Otu1801                                                 | 0                                         | 1.31                           | 0.89              | 4.41                  | 1.57                | 73.66                | <i>Arcobacter</i>                                  | <i>Campylobacteraceae</i>                 | <i>Campylobacterales</i>                        | <i>Epsilonproteobacteria</i> | <i>Proteobacteria</i>    | <i>Bacteria</i> |
| Otu0460                                                 | 0                                         | 1.08                           | 0.74              | 1.64                  | 1.3                 | 74.96                | <i>Arcobacter</i>                                  | <i>Campylobacteraceae</i>                 | <i>Campylobacterales</i>                        | <i>Epsilonproteobacteria</i> | <i>Proteobacteria</i>    | <i>Bacteria</i> |
| Otu1777                                                 | 5.49                                      | 5.32                           | 0.69              | 1.56                  | 1.22                | 76.18                | <i>Oceaniserpentilla</i>                           | <i>Oceanospirillaceae</i>                 | <i>Oceanospirillales</i>                        | <i>Gammaproteobacteria</i>   | <i>Proteobacteria</i>    | <i>Bacteria</i> |

| OTU     | Av.A <sub>i</sub><br>(pH <i>in situ</i> ) | Av.A <sub>i</sub><br>(pH 7.67) | Av.δ <sub>i</sub> | Av.δ <sub>i</sub> /SD | Av.δ <sub>i</sub> % | ΣAv.δ <sub>i</sub> % | Genus                                 | Family                                | Order                                 | Class                        | Phylum                | Domain          |
|---------|-------------------------------------------|--------------------------------|-------------------|-----------------------|---------------------|----------------------|---------------------------------------|---------------------------------------|---------------------------------------|------------------------------|-----------------------|-----------------|
| Otu0542 | 0.91                                      | 0                              | 0.62              | 1.18                  | 1.09                | 77.28                | unclass. <i>Oceanospirillaceae</i>    | <i>Oceanospirillaceae</i>             | <i>Oceanospirillales</i>              | <i>Gammaproteobacteria</i>   | <i>Proteobacteria</i> | <i>Bacteria</i> |
| Otu0571 | 1.95                                      | 1.28                           | 0.59              | 1.19                  | 1.04                | 78.31                | <i>Marinomonas</i>                    | <i>Oceanospirillaceae</i>             | <i>Oceanospirillales</i>              | <i>Gammaproteobacteria</i>   | <i>Proteobacteria</i> | <i>Bacteria</i> |
| Otu1781 | 1.09                                      | 0.48                           | 0.59              | 1.37                  | 1.04                | 79.35                | <i>Oceaniserpentilla</i>              | <i>Oceanospirillaceae</i>             | <i>Oceanospirillales</i>              | <i>Gammaproteobacteria</i>   | <i>Proteobacteria</i> | <i>Bacteria</i> |
| Otu0209 | 1.54                                      | 1.38                           | 0.58              | 1.4                   | 1.03                | 80.38                | unclass. <i>Oceanospirillales</i>     | unclass. <i>Oceanospirillales</i>     | <i>Oceanospirillales</i>              | <i>Gammaproteobacteria</i>   | <i>Proteobacteria</i> | <i>Bacteria</i> |
| Otu0010 | 0.97                                      | 0.2                            | 0.57              | 1.51                  | 1.01                | 81.39                | unclass. <i>Flavobacteriaceae</i>     | <i>Flavobacteriaceae</i>              | <i>Flavobacteriales</i>               | <i>Flavobacteria</i>         | <i>Bacteroidetes</i>  | <i>Bacteria</i> |
| Otu0140 | 1.08                                      | 0.68                           | 0.5               | 1.19                  | 0.88                | 82.27                | <i>Oleispira</i>                      | <i>Oceanospirillaceae</i>             | <i>Oceanospirillales</i>              | <i>Gammaproteobacteria</i>   | <i>Proteobacteria</i> | <i>Bacteria</i> |
| Otu1027 | 0                                         | 0.69                           | 0.48              | 0.8                   | 0.84                | 83.11                | unclass. <i>Epsilonproteobacteria</i> | unclass. <i>Epsilonproteobacteria</i> | unclass. <i>Epsilonproteobacteria</i> | <i>Epsilonproteobacteria</i> | <i>Proteobacteria</i> | <i>Bacteria</i> |
| Otu1804 | 0                                         | 0.6                            | 0.41              | 1.2                   | 0.72                | 83.83                | unclass. <i>Epsilonproteobacteria</i> | unclass. <i>Epsilonproteobacteria</i> | unclass. <i>Epsilonproteobacteria</i> | <i>Epsilonproteobacteria</i> | <i>Proteobacteria</i> | <i>Bacteria</i> |
| Otu0176 | 0.6                                       | 0.2                            | 0.38              | 1.1                   | 0.67                | 84.5                 | <i>Colwellia</i>                      | <i>Colwelliaceae</i>                  | <i>Alteromonadales</i>                | <i>Gammaproteobacteria</i>   | <i>Proteobacteria</i> | <i>Bacteria</i> |
| Otu1783 | 0.6                                       | 0.2                            | 0.38              | 1.1                   | 0.67                | 85.17                | <i>Marinomonas</i>                    | <i>Oceanospirillaceae</i>             | <i>Oceanospirillales</i>              | <i>Gammaproteobacteria</i>   | <i>Proteobacteria</i> | <i>Bacteria</i> |
| Otu0533 | 0.48                                      | 0                              | 0.33              | 0.78                  | 0.59                | 85.76                | <i>Nisaea</i>                         | <i>Rhodospirillaceae</i>              | <i>Rhodospirillales</i>               | <i>Alphaproteobacteria</i>   | <i>Proteobacteria</i> | <i>Bacteria</i> |
| Otu1084 | 0.48                                      | 0                              | 0.32              | 0.78                  | 0.57                | 86.33                | <i>Marinomonas</i>                    | <i>Oceanospirillaceae</i>             | <i>Oceanospirillales</i>              | <i>Gammaproteobacteria</i>   | <i>Proteobacteria</i> | <i>Bacteria</i> |
| Otu1231 | 0.48                                      | 0                              | 0.32              | 0.78                  | 0.57                | 86.9                 | unclass. <i>Gammaproteobacteria</i>   | unclass. <i>Gammaproteobacteria</i>   | unclass. <i>Gammaproteobacteria</i>   | <i>Gammaproteobacteria</i>   | <i>Proteobacteria</i> | <i>Bacteria</i> |
| Otu1079 | 0.4                                       | 0                              | 0.27              | 0.8                   | 0.48                | 87.38                | <i>Marinomonas</i>                    | <i>Oceanospirillaceae</i>             | <i>Oceanospirillales</i>              | <i>Gammaproteobacteria</i>   | <i>Proteobacteria</i> | <i>Bacteria</i> |
| Otu1802 | 0                                         | 0.4                            | 0.27              | 0.8                   | 0.48                | 87.86                | <i>Oceaniserpentilla</i>              | <i>Oceanospirillaceae</i>             | <i>Oceanospirillales</i>              | <i>Gammaproteobacteria</i>   | <i>Proteobacteria</i> | <i>Bacteria</i> |
| Otu1065 | 0.4                                       | 0                              | 0.27              | 0.8                   | 0.48                | 88.34                | <i>Marinomonas</i>                    | <i>Oceanospirillaceae</i>             | <i>Oceanospirillales</i>              | <i>Gammaproteobacteria</i>   | <i>Proteobacteria</i> | <i>Bacteria</i> |
| Otu0110 | 0                                         | 0.4                            | 0.26              | 0.49                  | 0.47                | 88.81                | unclass. <i>Rhodobacteraceae</i>      | <i>Rhodobacteraceae</i>               | <i>Rhodobacterales</i>                | <i>Alphaproteobacteria</i>   | <i>Proteobacteria</i> | <i>Bacteria</i> |
| Otu1807 | 0                                         | 0.4                            | 0.26              | 0.8                   | 0.47                | 89.27                | <i>Arcobacter</i>                     | <i>Campylobacteraceae</i>             | <i>Campylobacterales</i>              | <i>Epsilonproteobacteria</i> | <i>Proteobacteria</i> | <i>Bacteria</i> |
| Otu1782 | 0.2                                       | 0.2                            | 0.21              | 0.67                  | 0.37                | 89.65                | <i>Oceaniserpentilla</i>              | <i>Oceanospirillaceae</i>             | <i>Oceanospirillales</i>              | <i>Gammaproteobacteria</i>   | <i>Proteobacteria</i> | <i>Bacteria</i> |
| Otu0204 | 0                                         | 0.28                           | 0.2               | 0.49                  | 0.35                | 89.99                | unclass. <i>Colwelliaceae</i>         | <i>Colwelliaceae</i>                  | <i>Alteromonadales</i>                | <i>Gammaproteobacteria</i>   | <i>Proteobacteria</i> | <i>Bacteria</i> |
| Otu0115 | 0.28                                      | 0                              | 0.18              | 0.49                  | 0.33                | 90.32                | <i>Glaciecola</i>                     | <i>Alteromonadaceae</i>               | <i>Alteromonadales</i>                | <i>Gammaproteobacteria</i>   | <i>Proteobacteria</i> | <i>Bacteria</i> |
